# Supplementary material for: Late-stage (radio)fluorination of alkyl phosphonates via electrophilic activation
Source: PubMed Central journal article supplement — Nat Commun. 2024 Nov 28;15:10338. doi: 10.1038/s41467-024-54208-y (PMC11604993; doi:10.1038/s41467-024-54208-y), 2024-11-28
Supplement: 41467_2024_54208_MOESM1_ESM.pdf [file 41467_2024_54208_MOESM1_ESM.pdf]

# Supplementary Information for

## **Late-Stage (Radio)Fluorination of Alkyl Phosphonates via Electrophilic Activation**

Kaiqiang Zhang, *et al.*

# Table of Contents

|                                                                                                           |             |
|-----------------------------------------------------------------------------------------------------------|-------------|
| <b>1 Supplementary Notes.....</b>                                                                         | <b>S3</b>   |
| 1.1 General reagent information .....                                                                     | S3          |
| 1.2 General analytical information .....                                                                  | S3          |
| 1.3 General radiochemistry information.....                                                               | S4          |
| <b>2 Supplementary Methods .....</b>                                                                      | <b>S6</b>   |
| 2.1 Condition optimization for fluorination of alkyl phosphonates .....                                   | S6          |
| 2.2 General synthetic procedures and characterization .....                                               | S7          |
| 2.3 Experimental procedures for radiochemistry .....                                                      | S57         |
| 2.4 Automated radiosynthesis.....                                                                         | S85         |
| 2.5 From Stability to Interaction .....                                                                   | S90         |
| 2.6 Positron emission tomography imaging.....                                                             | S96         |
| 2.7 Mechanism proposal and computational study .....                                                      | S97         |
| <b>3 Supplementary Figures .....</b>                                                                      | <b>S103</b> |
| 3.1 Radio-TLC traces of RCCs .....                                                                        | S103        |
| 3.2 NMR spectra ( <sup>1</sup> H NMR, <sup>13</sup> C NMR, <sup>31</sup> P NMR, <sup>19</sup> F NMR)..... | S106        |
| <b>4 Supplementary references.....</b>                                                                    | <b>S413</b> |

## 1 Supplementary Notes

### 1.1 General reagent information

Commercially available reagents were procured from Energy Chemical (China) and Sigma-Aldrich (Switzerland) and utilized as received unless specified otherwise. Anhydrous *N,N*-dimethylformamide (DMF), anhydrous tetrahydrofuran (THF), anhydrous dimethyl sulfoxide (DMSO), all stored over molecular sieves, were purchased from Energy Chemical. Additional common solvents were procured from Sinopharm (China) and employed without further treatment. Deuterated solvents including CDCl<sub>3</sub>, D<sub>2</sub>O, CD<sub>3</sub>OD, CH<sub>3</sub>OD, and DMSO-*d*<sub>6</sub> were obtained from Energy Chemical; CD<sub>2</sub>Cl<sub>2</sub> was procured from Cambridge Isotope Laboratories (United States). Ultra-pure water was obtained from an ELGA PURELAB flex system (UK).

The compounds (**S16–S36**, E[c(RGDyK)]<sub>2</sub>) were procured from commercial suppliers and employed as reagents in the direct fluorination of alkyl phosphonates *via* electrophilic activation.

### 1.2 General analytical information

All fluorination reactions were carried out with magnetic agitation in oven-dried glass-bottomed vessels. Subsequent concentration of organic solutions was performed under reduced pressure using a Heidolph rotary evaporator (Hei-VAP Value, Germany). The reaction progress was tracked *via* thin-layer chromatography (TLC) on aluminum plates (2.5 cm × 5 cm) coated with silicone GF254, supplied by Energy Chemical, or on polyamide film plates sourced from Lu Qiao Si-Jia Biochemistry Plastics Company (China). Chromatographic visualization utilized a 254 nm ultraviolet fluorescence quenching technique, alkaline potassium permanganate staining, or iodine staining.

<sup>1</sup>H, <sup>13</sup>C, <sup>31</sup>P and <sup>19</sup>F nuclear magnetic resonance (NMR) spectra were recorded on a Zhongke-Niujin AS 400 MHz or Bruker AVANCE 600 MHz NMR spectrometer (China) at room temperature. All the chemical shifts (δ) for protons were reported in ppm downfield from tetramethylsilane (TMS) and were referenced to residual protium in the deuterated solvents (<sup>1</sup>H NMR: CD<sub>3</sub>OD at 3.31 ppm, CDCl<sub>3</sub> at 7.26 ppm). Chemical shifts for carbon signals were reported in ppm and were referenced to the carbon resonances of the solvent peak (<sup>13</sup>C NMR: CD<sub>3</sub>OD at 49.00 ppm, CDCl<sub>3</sub> at 77.00 ppm). Multiplicity was described with singlet (s), doublet (d) and multiplet (m). Coupling constants (*J*) were given in Hertz (Hz). High resolution mass spectrometry (HRMS)

data is recorded on a Waters Xevo G2-XS ToF mass Spectrometer (USA) or Thermo Q-Exactive Mass Spectrometer (USA). High-performance liquid chromatography (HPLC) analysis was performed using a NanoChrom C18 column (5  $\mu\text{m}$ , 4.6  $\times$  250 mm, China). HPLC purification was carried out on a SEP Basic-C18 semi-preparative column (120A 5 $\mu\text{m}$  10  $\times$  250 mm China).

### 1.3 General radiochemistry information

Activation of the Sep-Pak® Plus Short C18 cartridge (Waters, Part No. WAT020515): Using a 10 mL syringe, extract 5 mL of methanol and slowly wash the C18 column. Then, push 10 mL of air through the column to remove any remaining methanol. Next, wash the C18 column with 10 mL of pure water. Finally, push 10 mL of air through the column to complete the activation process.

Activation of the Sep-Pak® light QMA cartridge (Waters, USA): The QMA column was activated using a 10 mL syringe to draw 5 mL of a pre-prepared 0.5 M  $\text{K}_2\text{CO}_3$  solution, which was slowly washed through the column. Subsequently, 10 mL of air flushed the column to remove the liquid. Next, a wash with 10 mL of pure water was performed on the QMA column. Finally, an additional 10 mL of air completed the activation process.

HPLC analysis was performed using two Thermo Fisher Dionex ultra-mate 3000 instruments (United States) denoted as HPLC 1# and HPLC 2#, both equipped with an SPD-20A UV detector and an Elysia Raytest Gabi Star  $\gamma$ -radiation detector from Hungary, interconnected in series. In both HPLC 1# and 2#, the retention times of the radio peaks and the corresponding UV peaks were observed to shift by 0.10 to 0.20 min and 0.50 to 0.80 min, respectively, due to the distance between the UV detector (254 nm) and the radiation detector. Radio-TLC were acquired using an Eckert & Ziegler MS-1000F scanner from the United States, which was equipped with Mini-Scan and Flow-Count functionalities. All phosphonate fluorination precursors are now numbered as **S1–S57**, and the resulting fluorinated phosphonates are numbered **1–46**, with [ $^{18}\text{F}$ ] added before the corresponding Arabic numerals to indicate the  $^{18}\text{F}$ -products. Intermediates in the synthesis of phosphonate precursors are labeled as **i-1** to **i-10**, and unstable intermediates in mechanistic studies are represented as **INT-1** to **INT-5**. The bases in the additive screening are represented by the letter 'a' and superscript Arabic numerals from 1 to 11 (**a<sup>1</sup>-a<sup>11</sup>**).

## 2. Supplementary Methods

### 2.1 Condition optimization for fluorination of alkyl phosphonates

Table S1: Selected optimization table for alkyl phosphonates fluorination<sup>[a]</sup>

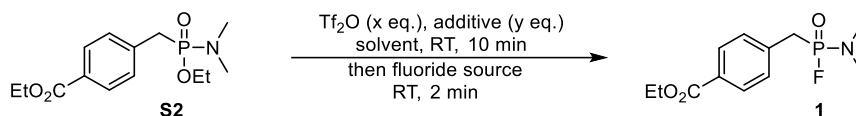

| Entry            | $\text{Tf}_2\text{O}/x$ eq. | Additive/<br>y eq.  | Solvnet <sup>[b]</sup>   | Fluoride<br>source                     | Conversion (%) <sup>[c]</sup> |
|------------------|-----------------------------|---------------------|--------------------------|----------------------------------------|-------------------------------|
| 1                | 1.0                         | Pyridine/1.0        | $\text{CH}_2\text{Cl}_2$ | TBAF                                   | $11 \pm 6$                    |
| 2                | 1.0                         | Pyridine/1.5        | $\text{CH}_2\text{Cl}_2$ | TBAF                                   | $36 \pm 3$                    |
| 3                | 1.5                         | Pyridine/1.0        | $\text{CH}_2\text{Cl}_2$ | TBAF                                   | $6 \pm 2$                     |
| 4                | 2.0                         | Pyridine/1.5        | $\text{CH}_2\text{Cl}_2$ | TBAF                                   | $19 \pm 3$                    |
| 5                | 2.0                         | Pyridine/2.0        | $\text{CH}_2\text{Cl}_2$ | TBAF                                   | $27 \pm 5$                    |
| 6                | 1.5                         | Pyridine/2.0        | $\text{CH}_2\text{Cl}_2$ | TBAF                                   | $47 \pm 1$                    |
| 7                | 1.5                         | Diphenylsulfane/2.0 | $\text{CH}_2\text{Cl}_2$ | TBAF                                   | 0                             |
| 8                | 1.5                         | Pyridine/2.0        | $\text{CH}_2\text{Cl}_2$ | $\text{Et}_3\text{N} \cdot 3\text{HF}$ | $93 \pm 3$                    |
| 9 <sup>[d]</sup> | TFAA, 1.5 eq.               | Pyridine/2.0        | $\text{CH}_2\text{Cl}_2$ | $\text{Et}_3\text{N} \cdot 3\text{HF}$ | trace                         |
| 10               | 1.5                         | Pyridine/2.0        | THF                      | $\text{Et}_3\text{N} \cdot 3\text{HF}$ | trace                         |
| 11               | 1.5                         | Pyridine/2.0        | Toluene                  | $\text{Et}_3\text{N} \cdot 3\text{HF}$ | $11 \pm 2$                    |
| 12               | 1.5                         | Pyridine/2.0        | $\text{CH}_3\text{CN}$   | $\text{Et}_3\text{N} \cdot 3\text{HF}$ | $35 \pm 2$                    |
| 13               | 1.5                         | Pyridine/2.0        | 1,4-Dioxane              | $\text{Et}_3\text{N} \cdot 3\text{HF}$ | $3 \pm 1$                     |

<sup>[a]</sup> Reactions were performed using 0.2 mmol **16**, tetrabutylammonium fluoride (TBAF 1.2 eq.)/ $\text{Et}_3\text{N} \cdot 3\text{HF}$  (0.5 eq.) in solvent (0.2 M).

<sup>[b]</sup>  $\text{CH}_2\text{Cl}_2$ : dichloromethane; THF: tetrahydrofuran;  $\text{CH}_3\text{CN}$ : acetonitrile.

<sup>[c]</sup> Conversions determined by  $^{31}\text{P}$  NMR.

<sup>[d]</sup> Replace  $\text{Tf}_2\text{O}$  with trifluoroacetic anhydride (TFAA).

## 2.2 General synthetic procedures and characterization

### General compounds information

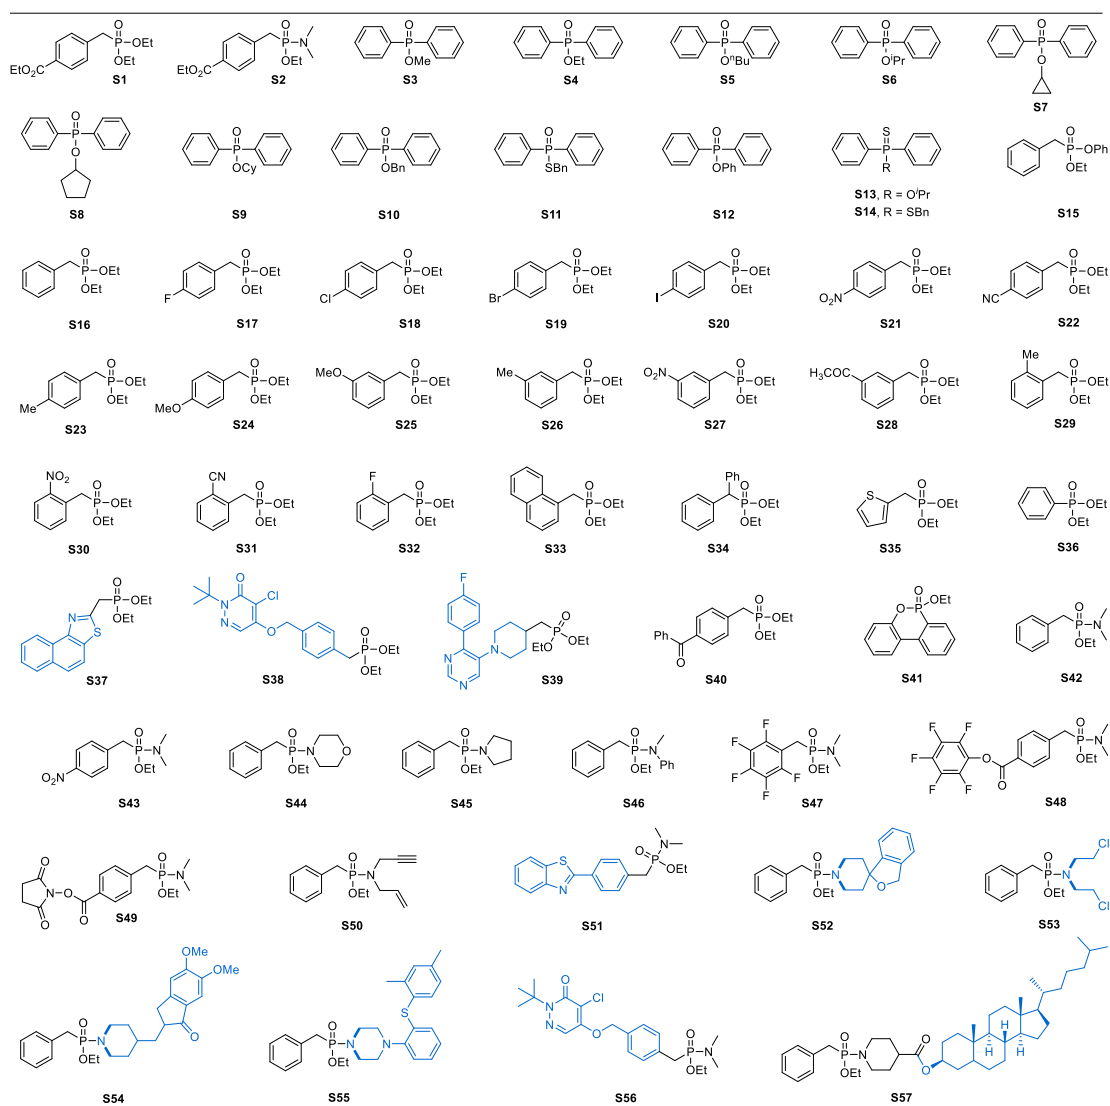

**Fig. S1:** An Overview of ethyl phosphonates (S1–S57) was discussed in this work.

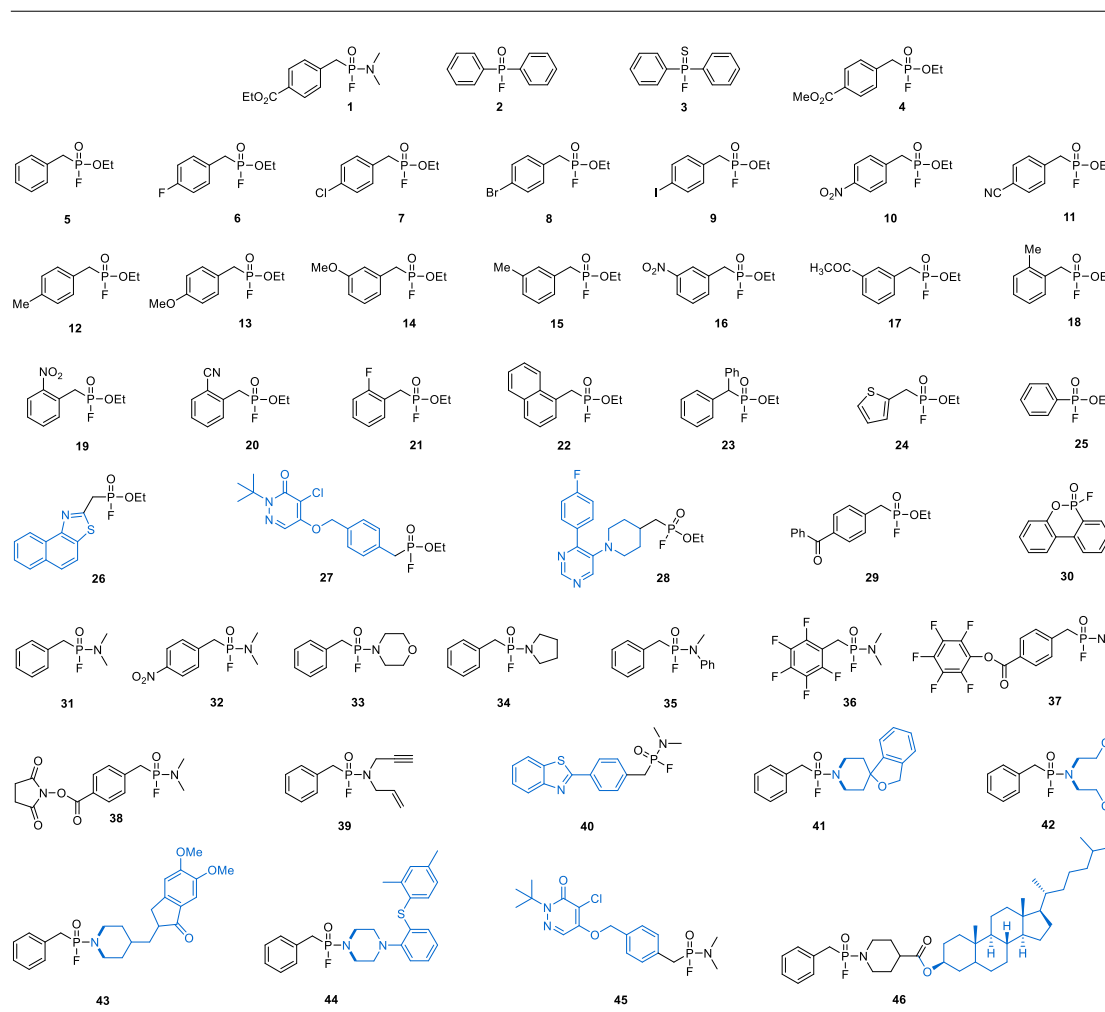

**Fig. S2:** An Overview of fluorophosphines (1–46) was discussed in this work.

## 2.2.1 General synthetic procedures for substrates

### Procedure A for the formation of S1

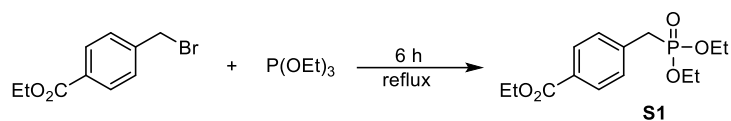

4-(Bromomethyl)benzoic acid ethyl ester (1.1 eq.) and triethyl phosphite (1.0 eq.) were initially stirred at room temperature without additional solvent and subsequently heated to 150 °C for refluxing over a period of 3–6 h<sup>1</sup>. The progress of the reaction was carefully monitored using thin-layer chromatography (TLC) or <sup>31</sup>P NMR. Once the reaction reached completion, any residual unreacted triethyl phosphite was removed through vacuum distillation. The resulting crude product was then subjected to purification by silica gel column chromatography with a mixture of petroleum ether and ethyl acetate as the eluent in a ratio of 3:1, effectively removing the solvent and yielding the purified compound S1.

### Ethyl 4-((diethoxyphosphoryl)methyl)benzoate (S1)

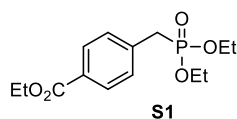

Colorless oil, yield: 73%.

**<sup>1</sup>H NMR (400 MHz, CDCl<sub>3</sub>):** δ 7.95 (d, *J* = 7.6 Hz, 2H), 7.3 (d, *J* = 7.6 Hz, 2H), 4.33 (q, *J* = 6.8 Hz, 2H), 3.98 (t, *J* = 7.2 Hz, 4H), 3.17 (d, *J* = 22.4 Hz, 2H), 1.35 (t, *J* = 7.2 Hz, 3H), 1.21 (t, *J* = 6.8 Hz, 6H).

**<sup>13</sup>C NMR (100 MHz, CDCl<sub>3</sub>):** δ 166.3, 136.9 (d, *J* = 9.2 Hz), 129.7, 129.6, 129.0 (d, *J* = 3.5 Hz), 62.2 (d, *J* = 6.7 Hz), 60.8, 33.9 (d, *J* = 136.8 Hz), 16.3 (d, *J* = 5.8 Hz), 14.2.

**<sup>31</sup>P NMR (162 MHz, CDCl<sub>3</sub>):** δ 25.2 (s, 1P).

**HRMS (m/z)** calculated for C<sub>14</sub>H<sub>22</sub>O<sub>5</sub>P<sup>+</sup> ([M+H]<sup>+</sup>): 301.1199, found: 301.1201.



## Procedure B for the formation of S2

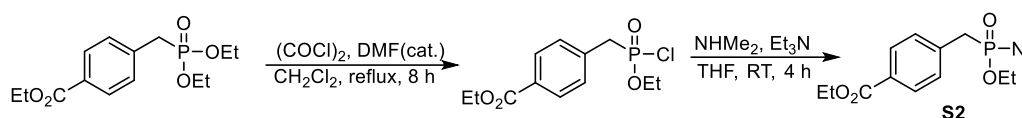

**Step 1:** Under ambient conditions, a 2 M solution of oxalyl chloride (2 eq.) was gradually added dropwise to the ethyl 4-((diethoxyphosphoryl)methyl)benzoate (**S1**) (1.0 eq.). Next, 2 drops of DMF were introduced as a catalyst. The reaction mixture was then heated to 60 °C and refluxed for 8 h<sup>2</sup>. The reaction progress was monitored using <sup>31</sup>P NMR, as the P<sup>v</sup>-Cl compound typically exhibits a chemical shift around 35–45 ppm. While TLC is ineffective in detecting the reaction process of unstable intermediates, <sup>31</sup>P NMR enables clear product identification and quantification of conversion. Upon completion of the reaction, the solvent and excess oxalyl chloride were removed under reduced pressure. The resulting product can be utilized directly in the subsequent step without requiring further purification.

**Step 2:** The initial product was dissolved in tetrahydrofuran, followed by the slow addition of a mixture of NHMe<sub>2</sub> and Et<sub>3</sub>N, both dissolved in THF, under ice bath conditions. Subsequently, the reaction mixture was allowed to warm up to RT and react for 2 h, with the progress of the reaction monitored by TLC. After the reaction was complete, the precipitate was filtered, and the solvent was removed under reduced pressure. The crude product was then purified using silica gel column chromatography to eliminate the solvent and obtain the purified compounds **S2**.

### Ethyl 4-(((dimethylamino)(ethoxy)phosphoryl)methyl)benzoate (**S2**)

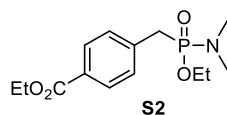

White solid, yield: 65%.

**<sup>1</sup>H NMR (400 MHz, CDCl<sub>3</sub>):** δ 7.91 (d, *J* = 8.0 Hz, 2H), 7.30 (d, *J* = 6.4 Hz, 2H), 4.30 (q, *J* = 7.2 Hz, 2H), 3.79–4.01 (m, 2H), 3.04–3.19 (m, 2H), 2.48 (t, *J* = 8 Hz, 6H), 1.32 (t, *J* = 7.2 Hz, 3H), 1.32 (t, *J* = 7.2 Hz, 3H).

**<sup>13</sup>C NMR (100 MHz, CDCl<sub>3</sub>):** δ 166.3, 137.9 (d, *J* = 8.1 Hz), 129.6, 129.5, 128.7 (d, *J* = 3.2 Hz), 60.7, 59.6 (d, *J* = 6.8 Hz), 36.2 (d, *J* = 3.9 Hz), 33.9 (d, *J* = 123.8 Hz), 16.1

(d,  $J = 6.5$  Hz), 14.2.

$^{31}\text{P}$  NMR (162 MHz,  $\text{CDCl}_3$ ):  $\delta$  29.9 (s, 1P).

HRMS ( $m/z$ ) calculated for  $\text{C}_{14}\text{H}_{23}\text{NO}_4\text{P}^+$  ( $[\text{M}+\text{H}]^+$ ): 300.1359; found: 300.1351.

### General procedure C for the formation of diphenylphosphinate (S3–S12).

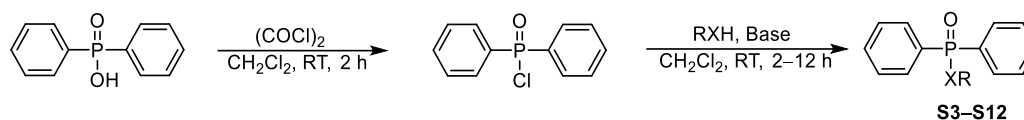

**Step 1:** The diphenylphosphinic acid was dissolved in a small amount of dichloromethane, and then oxalyl chloride (1.5 eq. 2 M in  $\text{CH}_2\text{Cl}_2$ ) was slowly added dropwise with vigorous stirring. The reaction was conducted at room temperature for 2 h<sup>3</sup>, and its progress was monitored using  $^{31}\text{P}$  NMR. After the reaction was completed, the solvent and residual oxalyl chloride were removed by vacuum evaporation without the need for purification.

**Step 2:** The reaction mixture from the previous step was then dissolved in  $\text{CH}_2\text{Cl}_2$ . A mixture of  $\text{RXH}$  and base (base = 2.0 eq.  $\text{Et}_3\text{N}$  for  $\text{R} = \text{Ar}/\text{Bn}$ ; base = 1.2 eq.  $\text{NaH}$  for  $\text{R} = \text{Alkyl}$ ) was gradually added dropwise under an ice bath, and the reaction was continued at room temperature for 2–12 h<sup>3</sup>. The advancement of the reaction was monitored by TLC. Upon completion of the reaction, the organic layer was extracted, and the collected organic phase was dried and concentrated. Subsequently, the crude product was purified using silica gel column chromatography with a petroleum ether: ethyl acetate eluent in a ratio of 3:2 to 1:1, to remove the solvent and obtain the purified compounds **S3–S12**.

### Methyl diphenylphosphinate (S3)

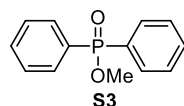

Colorless oil, yield: 87%.

$^1\text{H}$  NMR (400 MHz,  $\text{CDCl}_3$ ):  $\delta$  3.74 (d,  $J = 11.2$  Hz, 3H), 7.40–7.44 (m, 4H), 7.47–7.51 (m, 2H), 7.76–7.81 (m, 4H).

$^{13}\text{C}$  NMR (100 MHz,  $\text{CDCl}_3$ ):  $\delta$  132.2 (d,  $J = 2.6$  Hz), 131.6 (d,  $J = 10$  Hz), 130.3, 128.6 (d,  $J = 13.1$  Hz), 51.53 (d,  $J = 6$  Hz).

$^{31}\text{P}$  NMR (162 MHz,  $\text{CDCl}_3$ ):  $\delta$  33.3 (s, 1P).

HRMS (m/z) calculated for  $C_{13}H_{14}O_2P^+$  ( $[M+H]^+$ ): 233.0726; found: 233.0733.

#### Ethyl diphenylphosphinate (S4)

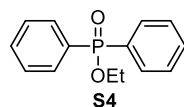

Colorless oil, yield: 64%.

$^1H$  NMR (400 MHz,  $CDCl_3$ ):  $\delta$  7.79 (dd,  $J = 12$  Hz, 8 Hz, 4H), 7.45–7.49 (m, 2H), 7.38–7.43 (m, 4H), 4.04–4.11 (m, 2H), 1.33 (t,  $J = 6.8$  Hz, 3H).

$^{13}C$  NMR (100 MHz,  $CDCl_3$ ):  $\delta$  131.9 (d,  $J = 10.4$  Hz), 131.5 (d,  $J = 40.4$  Hz), 131.4 (d,  $J = 137$  Hz), 128.4 (d,  $J = 52$  Hz), 61.1 (d,  $J = 23.6$  Hz), 16.3 (d,  $J = 26$  Hz).

$^{31}P$  NMR (162 MHz,  $CDCl_3$ ):  $\delta$  31.5 (s, 1P).

HRMS (m/z) calculated for  $C_{14}H_{16}O_2P^+$  ( $[M+H]^+$ ): 247.0882; found: 247.0890.

#### Butyl diphenylphosphinate (S5)

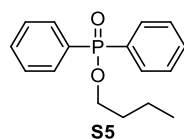

White solid, yield: 77%.

$^1H$  NMR (400 MHz,  $CDCl_3$ ):  $\delta$  7.78–7.83 (m, 4H), 7.48–7.52 (m, 2H), 7.41–7.46 (m, 4H), 4.02 (q,  $J = 6.8$  Hz, 2H), 1.67–1.74 (m, 2H), 1.38–1.48 (m, 2H), 0.91 (t,  $J = 7.6$  Hz, 3H).

$^{13}C$  NMR (100 MHz,  $CDCl_3$ ):  $\delta$  132.0 (d,  $J = 2.6$  Hz), 133.7 (d,  $J = 136$  Hz), 131.6 (d,  $J = 10$  Hz), 128.5 (d,  $J = 13$  Hz), 64.7 (d,  $J = 6$  Hz), 32.6 (d,  $J = 6.5$  Hz), 18.8, 13.6.

$^{31}P$  NMR (162 MHz,  $CDCl_3$ ):  $\delta$  31.1 (s, 1P).

HRMS (m/z) calculated for  $C_{16}H_{20}O_2P^+$  ( $[M+H]^+$ ): 275.1195; found: 275.1208.

#### Isopropyl diphenylphosphinate (S6)

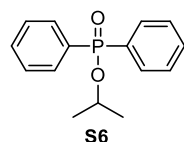

White solid, yield: 52%.

$^1H$  NMR (400 MHz,  $CDCl_3$ ):  $\delta$  7.78–7.83 (m, 4H), 7.47–7.50 (m, 2H), 7.40–7.44 (m, 4H), 4.63–4.70 (m, 1H), 1.33 (d,  $J = 6.4$  Hz, 6H).

**<sup>13</sup>C NMR (100 MHz, CDCl<sub>3</sub>):** δ 24.3 (d, *J* = 4 Hz), 70.2 (d, *J* = 6 Hz), 128.4 (d, *J* = 13 Hz), 131.6 (d, *J* = 10 Hz), 131.9 (d, *J* = 2.6 Hz), 132.4 (d, *J* = 136 Hz).

**<sup>31</sup>P NMR (162 MHz, CDCl<sub>3</sub>):** δ 29.7 (s, 1P).

**HRMS (m/z)** calculated for C<sub>15</sub>H<sub>18</sub>O<sub>2</sub>P<sup>+</sup> ([M+H]<sup>+</sup>): 261.1039; found: 261.1044.

### Cyclopropyl diphenylphosphinate (S7)

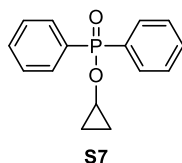

Colorless oil, yield: 37%.

**<sup>1</sup>H NMR (400 MHz, CDCl<sub>3</sub>):** δ 7.75–7.80 (m, 4H), 7.45–7.49 (m, 2H), 7.38–7.43 (m, 4H), 3.86–3.91 (m, 1H), 0.82–0.83 (m, 2H), 0.51–0.55 (m, 2H).

**<sup>13</sup>C NMR (100 MHz, CDCl<sub>3</sub>):** δ 132.1, 131.3 (d, *J* = 137 Hz), 131.5 (d, *J* = 10.2 Hz), 128.4 (d, *J* = 13.1 Hz), 49.8 (d, *J* = 6 Hz), 5.7 (d, *J* = 4.1 Hz).

**<sup>31</sup>P NMR (162 MHz, CDCl<sub>3</sub>):** δ 32.4 (s, 1P).

**HRMS (m/z)** calculated for C<sub>15</sub>H<sub>16</sub>O<sub>2</sub>P<sup>+</sup> ([M+H]<sup>+</sup>): 259.0882; found: 259.0886.

### Cyclopentyl diphenylphosphinate (S8)

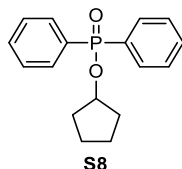

White solid, yield: 75%.

**<sup>1</sup>H NMR (400 MHz, CDCl<sub>3</sub>):** δ 7.76–7.81 (m, 4H), 7.45–7.50 (m, 2H), 7.41–7.43 (m, 4H), 4.88 (m, 1H), 1.79–1.89 (m, 6H), 1.56 (m, 2H).

**<sup>13</sup>C NMR (100 MHz, CDCl<sub>3</sub>):** δ 132.4 (d, *J* = 137 Hz), 131.8 (d, *J* = 2.4 Hz), 131.6 (d, *J* = 10 Hz), 128.4 (d, *J* = 13 Hz), 78.7 (d, *J* = 6.3 Hz), 34.28 (d, *J* = 4.1 Hz), 23.0.

**<sup>31</sup>P NMR (162 MHz, CDCl<sub>3</sub>):** δ 29.9 (s, 1P).

**HRMS (m/z)** calculated for C<sub>17</sub>H<sub>20</sub>O<sub>2</sub>P<sup>+</sup> ([M+H]<sup>+</sup>): 287.1195; found: 287.1201.

### Cyclohexyl diphenylphosphinate (S9)

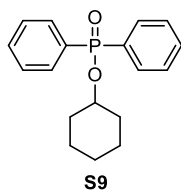

White solid, yield: 69%.

**<sup>1</sup>H NMR (400 MHz, CDCl<sub>3</sub>):** δ 7.78–7.83 (m, 4H), 7.48–7.50 (m, 2H), 7.42–7.44 (m, 4H), 4.40–4.42 (m, 1H), 1.87–1.88 (m, 2H), 1.70–1.72 (m, 2H), 1.59–1.61 (m, 2H), 1.37–1.47 (m, 1H), 1.26–1.36 (m, 3H).

**<sup>13</sup>C NMR (100 MHz, CDCl<sub>3</sub>):** δ 132.6 (d, *J* = 136 Hz), 131.8 (d, *J* = 2.4 Hz), 131.5 (d, *J* = 10 Hz), 128.6 (d, *J* = 13 Hz), 74.9 (d, *J* = 6.1 Hz), 33.9 (d, *J* = 3.5 Hz), 25.1, 23.5.

**<sup>31</sup>P NMR (162 MHz, CDCl<sub>3</sub>):** δ 29.7 (s, 1P).

**HRMS (m/z)** calculated for C<sub>18</sub>H<sub>22</sub>O<sub>2</sub>P<sup>+</sup> ([M+H]<sup>+</sup>): 301.1352; found: 301.1359.

### Benzyl diphenylphosphinate (S10)

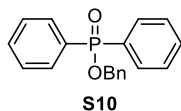

White solid, yield: 81%.

**<sup>1</sup>H NMR (400 MHz, CDCl<sub>3</sub>):** δ 7.81–7.86 (m, 4H), 7.51–7.53 (m, 2H), 7.41–7.46 (m, 4H), 7.29–7.37 (m, 5H), 5.07 (d, *J* = 6.8 Hz, 2H).

**<sup>13</sup>C NMR (100 MHz, CDCl<sub>3</sub>):** δ 136.3 (d, *J* = 7.4 Hz), 132.1 (d, *J* = 2.6 Hz), 131.6 (d, *J* = 10.2 Hz), 131.9, 130.6, 128.5 (d, *J* = 7.9 Hz), 128.1 (d, *J* = 63.9 Hz), 128.2, 66.2 (d, *J* = 5.5 Hz).

**<sup>31</sup>P NMR (162 MHz, CDCl<sub>3</sub>):** δ 32.3 (s, 1P).

**HRMS (m/z)** calculated for C<sub>19</sub>H<sub>18</sub>O<sub>2</sub>P<sup>+</sup> ([M+H]<sup>+</sup>): 309.1039; found: 309.1042.

### S-benzyl diphenylphosphinothioate (S11)

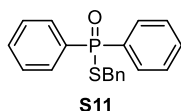

White solid, yield: 78%.

**<sup>1</sup>H NMR (400 MHz, CDCl<sub>3</sub>):** δ 7.84–7.89 (m, 4H), 7.45–7.52 (m, 6H), 7.39–7.45 (m, 4H), 7.20–7.23 (m, 5H), 4.02 (d, *J* = 2.3 Hz, 2H).

**<sup>13</sup>C NMR (100 MHz, CDCl<sub>3</sub>):** δ 136.8 (d, *J* = 5.3 Hz), 133.1 (d, *J* = 106 Hz), 132.3 (d, *J* = 2.8 Hz), 131.5 (d, *J* = 10.4 Hz), 128.9, 128.7, 128.53 (d, *J* = 2.4 Hz), 127.4, 33.1 (d,

$J = 1.7$  Hz).

$^{31}\text{P}$  NMR (162 MHz,  $\text{CDCl}_3$ ):  $\delta$  42.7 (s, 1P).

HRMS ( $m/z$ ) calculated for  $\text{C}_{19}\text{H}_{18}\text{OPS}^+$  ( $[\text{M}+\text{H}]^+$ ): 325.0810; found: 325.0816.

### Phenyl diphenylphosphinate (S12)

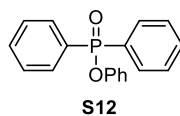

White solid, yield: 65%.

$^1\text{H}$  NMR (400 MHz,  $\text{CDCl}_3$ ):  $\delta$  7.11 (t,  $J = 3.4$  Hz, 1H), 7.24–7.31 (m, 4H), 7.48–7.52 (m, 4H), 7.55–7.59 (m, 2H), 7.91–7.97 (m, 4H).

$^{13}\text{C}$  NMR (100 MHz,  $\text{CDCl}_3$ ):  $\delta$  150.9 (d,  $J = 8.3$  Hz), 132.4 (d,  $J = 2.7$  Hz), 131.8 (d,  $J = 10.3$  Hz), 130.9 (d,  $J = 137$  Hz), 129.6, 128.5 (d,  $J = 13.4$  Hz), 124.5, 120.7 (d,  $J = 4.7$  Hz).

$^{31}\text{P}$  NMR (162 MHz,  $\text{CDCl}_3$ ):  $\delta$  30.4 (s, 1P).

HRMS ( $m/z$ ) calculated for  $\text{C}_{18}\text{H}_{16}\text{O}_2\text{P}^+$  ( $[\text{M}+\text{H}]^+$ ): 295.0882; found: 295.0894.

## General procedure D for the formation of diphenylphosphinothioate (S13, S14)

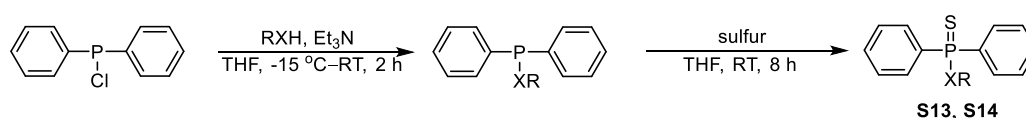

Chlorodiphenylphosphane (1.1 equiv.) was dissolved in THF, and the temperature was lowered to  $-15\text{ }^{\circ}\text{C}$ . Then, a mixture of 1.0 eq. RXH (propane-2-alcohol/phenyl methylmercaptan) and 1.2 eq.  $\text{Et}_3\text{N}$  was slowly added dropwise. The reaction mixture was then allowed to warm up to room temperature (RT) and react for 2 h<sup>4</sup>. After the completion of the reaction, sulfur (5.0 eq.) was added to the reaction system, and the reaction was continued at RT for 8 h. The progress of the reaction was monitored by TLC. Upon completion of the reaction, the reaction mixture was extracted, and the organic phase was collected, dried, and concentrated under reduced pressure. Subsequently, the crude product was purified using silica gel column chromatography to remove the solvent and obtain the purified compounds **S13**, **S14**.

### *O*-Isopropyl diphenylphosphinothioate (**S13**)

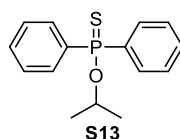

White solid, yield: 43%.

**<sup>1</sup>H NMR (400 MHz, CDCl<sub>3</sub>):**  $\delta$  7.86–7.92 (m, 4H), 7.38–7.44 (m, 6H), 4.86–4.95 (m, 1H), 1.30 (d,  $J = 6.4$  Hz, 6H).

**<sup>13</sup>C NMR (100 MHz, CDCl<sub>3</sub>):**  $\delta$  133.1, 131.9 (d,  $J = 2.6$  Hz), 131.6 (d,  $J = 10$  Hz), 128.4 (d,  $J = 13$  Hz), 70.3 (d,  $J = 6$  Hz), 24.3 (d,  $J = 4$  Hz).

**<sup>31</sup>P NMR (162 MHz, CDCl<sub>3</sub>):**  $\delta$  42.1 (s, 1P).

**HRMS (m/z)** calculated for  $\text{C}_{15}\text{H}_{18}\text{OPS}^+$  ( $[\text{M}+\text{H}]^+$ ): 277.0810; found: 277.0816.

### Benzyl diphenylphosphinodithioate (**S14**)

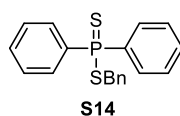

White solid, yield: 21%.

**<sup>1</sup>H NMR (400 MHz, CDCl<sub>3</sub>):**  $\delta$  7.96–7.81 (m, 4H), 7.51–7.54 (m, 6H), 7.30–7.32 (m,

2H), 7.19–7.27 (m, 3H), 4.22 (d,  $J = 3$  Hz, 2H).

$^{13}\text{C}$  NMR (100 MHz,  $\text{CDCl}_3$ ):  $\delta$  136.7 (d,  $J = 5.7$  Hz), 134.1 (d,  $J = 84$  Hz), 133.8 (d,  $J = 3$  Hz), 131.5 (d,  $J = 11.3$  Hz), 129.3, 128.6, 128.5 (d,  $J = 4.1$  Hz), 127.44, 35.9 (d,  $J = 1.4$  Hz).

$^{31}\text{P}$  NMR (162 MHz,  $\text{CDCl}_3$ ):  $\delta$  64.1 (s, 1P).

HRMS ( $m/z$ ) calculated for  $\text{C}_{19}\text{H}_{18}\text{PS}_2^+$  ( $[\text{M}+\text{H}]^+$ ): 341.0582; found: 341.0588.

### General procedure E for the formation of S15

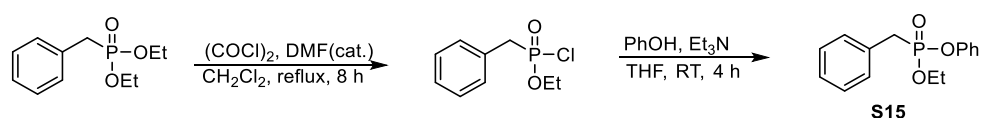

**Step 1:** The synthesis method employs **Step 1 of Procedure B**.

**Step 2:** The initial product was dissolved in tetrahydrofuran, followed by the slow addition of a mixture of PhOH and  $\text{Et}_3\text{N}$ , both dissolved in THF, under ice bath conditions. Subsequently, the reaction mixture was allowed to warm up to RT and react for 2 h, with the progress of the reaction monitored by TLC. After the reaction was complete, the precipitate was filtered, and the solvent was removed under reduced pressure. The crude product was then purified using silica gel column chromatography to eliminate the solvent and obtain the purified compounds **S15**.

### Phenyl benzylphosphonate (S15)

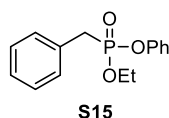

Colorless oil, yield: 54%.

$^1\text{H}$  NMR (400 MHz,  $\text{CDCl}_3$ ):  $\delta$  7.33–7.21 (m, 7H), 7.15–7.06 (m, 3H), 4.13–3.98 (m, 2H), 3.31 (dd,  $J = 21.7, 2.6$  Hz, 2H), 1.19 (t,  $J = 7.1$  Hz, 3H).

$^{13}\text{C}$  NMR (100 MHz,  $\text{CDCl}_3$ ):  $\delta$  150.5 (d,  $J = 8.8$  Hz), 130.9 (d,  $J = 9.4$  Hz), 129.9 (d,  $J = 6.8$  Hz), 129.6, 128.6 (d,  $J = 3.2$  Hz), 127.0 (d,  $J = 3.7$  Hz), 124.8, 120.4 (d,  $J = 4.3$  Hz), 63.0 (d,  $J = 7.2$  Hz), 33.7 (d,  $J = 138.9$  Hz), 16.2 (d,  $J = 5.9$  Hz).

$^{31}\text{P}$  NMR (162 MHz,  $\text{CDCl}_3$ ):  $\delta$  23.3 (s, 1P).

HRMS ( $m/z$ ) calculated for  $\text{C}_{15}\text{H}_{18}\text{O}_3\text{P}^+$  ( $[\text{M}+\text{H}]^+$ ): 277.0988; found: 277.0982.



### Procedure F for the formation of S37

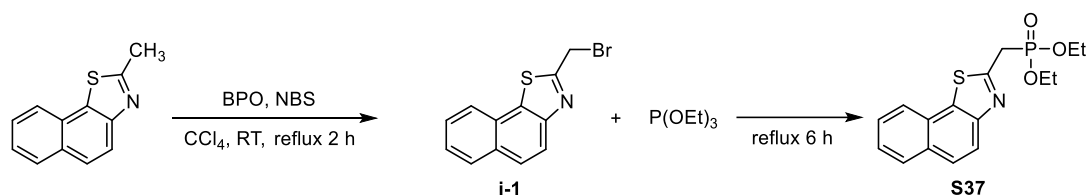

**Step 1:** 2-methylnaphtho[2,1-*d*]thiazole (4 mmol, 1.0 eq.) and *N*-bromosuccinimide (NBS, 1.0 eq.) were introduced into the reaction flask, succeeded by the addition of the dibenzoyl peroxide (BPO, 0.05 eq.) in 50 mL CCl<sub>4</sub>, while maintaining constant stirring. Elevate the mixture's temperature to 80 °C and maintain reflux for a duration of 2 h<sup>5</sup>. The reaction's progression was monitored using TLC. After the completion of the reaction, allow it to cool to RT, filter the mixture, and remove CCl<sub>4</sub> under reduced pressure. For column chromatography purification of the residue, a mixture of petroleum ether and ethyl acetate (3:2–1:1) was employed as the elution, resulting in the isolation of the purified bromine compound **i-1**.

**Step 2:** The synthesis method employs **Procedure A**.

### Ethyl (naphtho[1,2-*d*]thiazol-2-ylmethyl)phosphonofluoridate (S37)

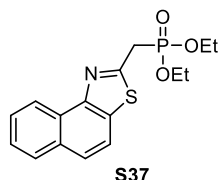

Colorless oil, yield: 74%.

**<sup>1</sup>H NMR (600 MHz, CDCl<sub>3</sub>):** δ 8.76 (d, *J* = 8.3 Hz, 1H), 7.92 (d, *J* = 8.1 Hz, 1H), 7.84 (d, *J* = 7.4 Hz, 1H), 7.78 (d, *J* = 8.8 Hz, 1H), 7.65 (t, *J* = 7.6 Hz, 1H), 7.56 (t, *J* = 7.2 Hz, 1H), 4.22–4.13 (m, 4H), 3.84 (d, *J* = 20.0 Hz, 2H), 1.31 (t, *J* = 7.2 Hz, 6H).

**<sup>13</sup>C NMR (151 MHz, CDCl<sub>3</sub>):** δ 159.8 (d, *J* = 9.8 Hz), 149.2, 132.6, 131.9, 128.5, 128.1, 127.0, 126.1, 125.9, 123.8, 118.8, 63.0 (d, *J* = 6.6 Hz), 33.5, 16.4 (d, *J* = 5.7 Hz).

**<sup>31</sup>P NMR (243 MHz, CDCl<sub>3</sub>):** δ 21.2 (s, 1P).

**HRMS (m/z)** calculated for C<sub>16</sub>H<sub>18</sub>NNaO<sub>3</sub>PS<sup>+</sup> ([M+Na]<sup>+</sup>): 358.0637; found: 358.0630.

### Procedure G for the formation of S38

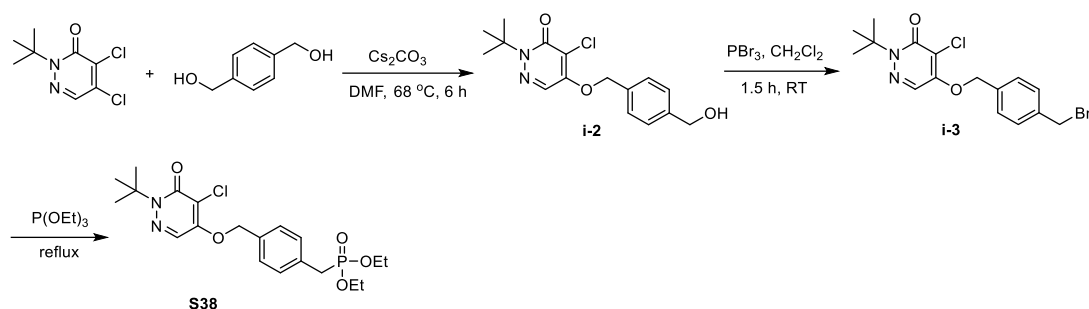

**Step 1:** 2-(*tert*-Butyl)-4,5-dichloropyridazin-3(2H)-one (4.53 mmol) was dissolved in 15 mL dry DMF. 1,4-phenylene dimethanol (3.2 g, 23.16 mmol) and Cs<sub>2</sub>CO<sub>3</sub> (6.0 g, 18.41 mmol) were added, and the mixture was stirred at 68 °C for 6 h, then cooled. The product was extracted with EtOAc, dried under vacuum, and purified by column chromatography to yield compound **i-2** as a white solid<sup>6</sup>.

**Step 2:** Compound **i-2** (0.91 g, alcoholic) was dissolved in 15 ml of dry dichloromethane. PBr<sub>3</sub> (0.14 ml) was then introduced dropwise into the solution. The reaction was performed at room temperature for approximately 1.5 h. The crude product was isolated by extraction with water (30 mL) and dried under vacuum. The resulting white solid product **i-3** was obtained in a quantitative yield, ready for the subsequent step without further purification.

**Step 3:** The synthesis of compound **S38** was completed according to the synthesis **Procedure A** of this study.

### 2-(*Tert*-butyl)-4-chloro-5-((4-(hydroxymethyl)benzyl)oxy)pyridazin-3(2H)-one (**i-2**)

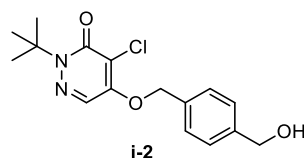

White solid, yield: 76%.

<sup>1</sup>H NMR (400 MHz, CDCl<sub>3</sub>): δ 7.71 (s, 1H), 7.40 (d, *J* = 1.6 Hz, 4H), 5.30 (s, 2H), 4.71 (s, 2H), 1.61 (s, 9H).

<sup>13</sup>C NMR (100 MHz, CDCl<sub>3</sub>): δ 159.0, 153.7, 141.7, 134.0, 127.4, 127.3, 125.1, 118.2, 71.6, 66.4, 64.7, 27.8.

HRMS (*m/z*) calculated for C<sub>16</sub>H<sub>20</sub>ClN<sub>2</sub>O<sub>3</sub><sup>+</sup> ([M+H]<sup>+</sup>): 323.1157; found: 323.1151.

**5-((4-(Bromomethyl)benzyl)oxy)-2-(tert-butyl)-4-chloropyridazin-3(2H)-one (i-3)**

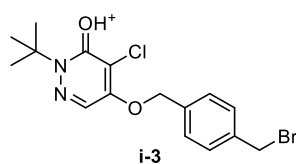

White solid, yield: 96%.

**<sup>1</sup>H NMR (400 MHz, CDCl<sub>3</sub>):** δ 7.71 (s, 1H), 7.43 (d, *J* = 7.6 Hz, 2H), 7.39 (d, *J* = 7.6 Hz, 2H), 5.30 (s, 2H), 4.49 (s, 2H), 1.62 (s, 9H).

**<sup>13</sup>C NMR (100 MHz, CDCl<sub>3</sub>):** δ 158.9, 153.5, 138.4, 135.0, 129.6, 127.4, 124.9, 118.2, 71.3, 66.4, 32.7, 27.8.

**HRMS (m/z)** calculated for C<sub>16</sub>H<sub>19</sub>BrClN<sub>2</sub>O<sub>2</sub><sup>+</sup> ([M+H]<sup>+</sup>): 385.0313; found: 385.0318.

**Diethyl 4-(((1-(tert-butyl)-5-chloro-6-oxo-1,6-dihydropyridazin-4-yl)oxy)methyl)benzyl)phosphonate (S38)**

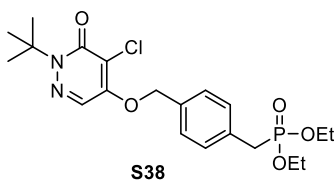

White solid, yield: 69%.

**<sup>1</sup>H NMR (400 MHz, CDCl<sub>3</sub>):** δ 7.69 (s, 1H), 7.29–7.32 (s, 4H), 5.26 (d, *J* = 1.6 Hz, 2H), 3.96–3.99 (m, 4H), 3.12 (d, *J* = 21.6 Hz, 2H), 1.58 (s, 9H), 1.19, (t, *J* = 7.2 Hz, 6H).

**<sup>13</sup>C NMR (100 MHz, CDCl<sub>3</sub>):** δ 158.9, 153.5, 133.4 (d, *J* = 3.9 Hz), 132.3 (d, *J* = 9.0 Hz), 130.2 (d, *J* = 6.5 Hz), 127.2 (d, *J* = 2.9 Hz), 125.0, 118.1, 71.4, 66.3, 62.1 (d, *J* = 6.7 Hz), 33.4 (d, *J* = 137.5 Hz), 27.7, 16.2 (d, *J* = 5.9 Hz).

**<sup>31</sup>P NMR (162 MHz, DMSO-*d*<sub>6</sub>):** δ 25.9 (1P).

**HRMS (m/z)** calculated for C<sub>20</sub>H<sub>29</sub>ClN<sub>2</sub>O<sub>5</sub>P<sup>+</sup> ([M+H]<sup>+</sup>): 443.1497; found: 443.1492.

## Procedure H for the formation of S39

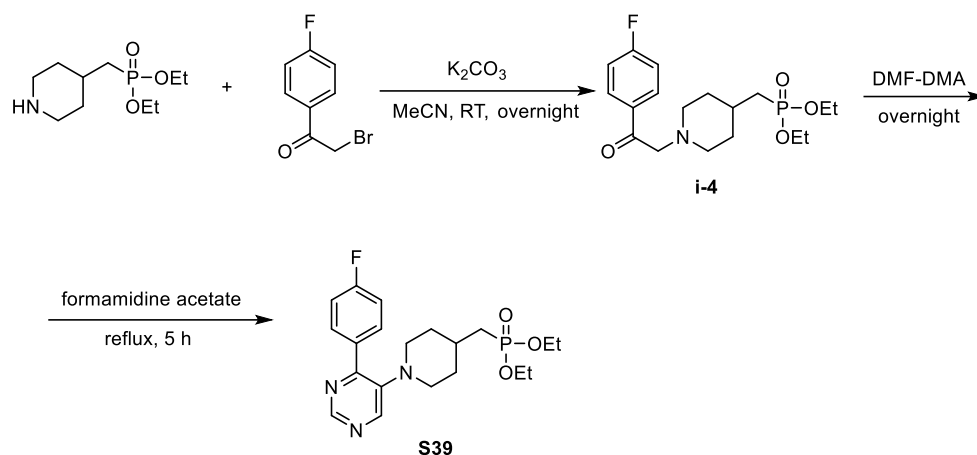

To a solution of diethyl (piperidin-4-ylmethyl)phosphonate (5.8 g, 25.0 mmol) and  $K_2CO_3$  (4.33 g, 31.3 mmol) in acetonitrile (50 mL), 2-bromo-1-(4-fluorophenyl)ethanone (4.91 g, 22.7 mmol) dissolved in acetonitrile (30 mL) was added dropwise at room temperature. The reaction mixture was stirred overnight at the same temperature. Following this, the mixture was concentrated under reduced pressure, diluted with water, and extracted with ethyl acetate. The organic phase was washed with brine, dried over sodium sulfate, filtered, and then concentrated in vacuo. The resulting pale yellow solid, **i-4** (7.42 g, 88%), was used directly in the subsequent reaction without additional purification.

A solution of **i-4** (3.71 g, 10 mmol) and DMF-DMA (18.2 mL, 130 mmol) was heated to reflux overnight. After cooling, the mixture was concentrated under reduced pressure. The residue was then dissolved in *n*-butanol (10 mL) and diisopropylethylamine (DIPEA, 10 mL). Formamidine acetate (3.6 g, 35 mmol) was added, and the resulting mixture was stirred at 100 °C overnight. The reaction mixture was then diluted with water and extracted with ethyl acetate. The organic layer was washed with water and brine, dried over magnesium sulfate, filtered, and concentrated under reduced pressure. The crude product was purified by column chromatography on silica gel to afford **S39** (1.75 g, 43%) as a dark brown oil.

## Diethyl ((1-(4-(4-fluorophenyl)pyrimidin-5-yl)piperidin-4-yl)methyl)phosphonate (S39)

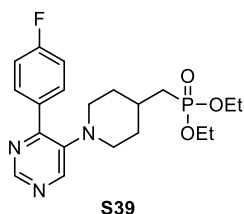

Dark brown oil, yield: 43%.

**<sup>1</sup>H NMR (400 MHz, CDCl<sub>3</sub>):** δ 8.88 (s, 1H), 8.40 (s, 1H), 8.06–8.19 (m, 2H), 7.13–7.19 (m, 2H), 4.06–4.13 (m, 4H), 3.18 (d, *J* = 10.1 Hz, 2H), 2.62–2.68 (m, 2H), 2.04–2.07 (m, 2H), 1.82–1.90 (m, 3H), 1.69–1.78 (m, 2H), 1.32 (t, *J* = 7.2 Hz, 6H).

**<sup>13</sup>C NMR (100 MHz, CDCl<sub>3</sub>):** δ 164.3, 162.7, 156.5, 152.4, 147.1, 144.0, 134.0, 130.2 (d, *J* = 8.3 Hz), 115.4 (d, *J* = 21.2 Hz), 61.5 (d, *J* = 6.6 Hz), 50.7, 33.1 (d, *J* = 11.0 Hz), 32.7, 31.8, 30.3 (d, *J* = 4.3 Hz), 16.4 (d, *J* = 5.7 Hz).

**<sup>31</sup>P NMR (162 MHz, CDCl<sub>3</sub>):** δ 30.5 (s, 1P).

**<sup>19</sup>F NMR (376 MHz, CDCl<sub>3</sub>):** δ -110.5 (s, 1F).

**HRMS (m/z)** calculated for C<sub>20</sub>H<sub>27</sub>FN<sub>3</sub>NaO<sub>3</sub>P<sup>+</sup> ([M+Na]<sup>+</sup>): 430.1666; found: 430.1660.

### Procedure I for the formation of S40

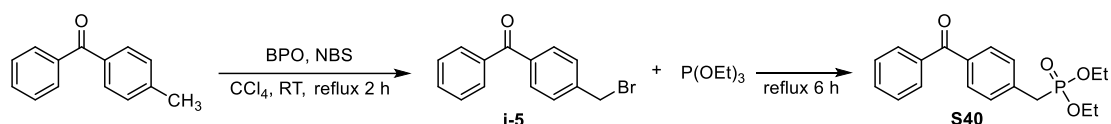

**Step 1:** Phenyl(*p*-tolyl)methanone (4 mmol, 1.0 eq.) and *N*-bromosuccinimide (NBS, 1.0 eq.) were introduced into the reaction flask, succeeded by the addition of the dibenzoyl peroxide (BPO, 0.05 eq.) in 50 mL CCl<sub>4</sub>, while maintaining constant stirring. Elevate the mixture's temperature to 80 °C and maintain reflux for a duration of 2 h<sup>7</sup>. The reaction's progression was monitored using TLC. After the completion of the reaction, allow it to cool to RT, filter the mixture, and remove CCl<sub>4</sub> under reduced pressure. For column chromatography purification of the residue, a mixture of petroleum ether and ethyl acetate (3:2–1:1) was employed as the elution, resulting in the isolation of the purified compound **i-5**.

**Step 2:** The synthesis method employs **Procedure A**.

### Diethyl (4-benzoylbenzyl)phosphonate (**i-5**)

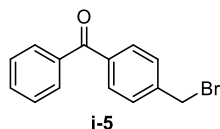

White solid, yield: 93%.

<sup>1</sup>H NMR (400 MHz, CDCl<sub>3</sub>): δ 7.77–7.80 (m, 4H), 7.60 (t, *J* = 7.6 Hz, 1H), 7.47–7.51 (m, 4H), 4.53 (s, 2H).

<sup>13</sup>C NMR (100 MHz, CDCl<sub>3</sub>): δ 195.9, 142.1, 137.4, 132.5, 130.5, 129.9, 128.9, 128.3, 32.2.

HRMS (*m/z*) calculated for C<sub>14</sub>H<sub>12</sub>BrO<sup>+</sup> ([*M*+*H*]<sup>+</sup>): 275.0066; found: 275.0061.

### Diethyl (4-benzoylbenzyl)phosphonate (**S40**)

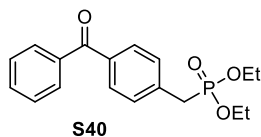

White solid, yield: 77%.

<sup>1</sup>H NMR (400 MHz, CDCl<sub>3</sub>): δ 7.77 (t, *J* = 6.0 Hz, 4H), 7.58 (t, *J* = 6.8 Hz, 1H), 7.47

(t,  $J = 6.8$  Hz, 2H), 7.41 (d,  $J = 8.0$  Hz, 2H), 4.01–4.09 (m, 4H), 3.22 (d,  $J = 22.4$  Hz, 2H), 1.26 (t,  $J = 7.2$  Hz, 6H).

**$^{13}\text{C}$  NMR (100 MHz,  $\text{CDCl}_3$ ):**  $\delta$  196.2, 137.6, 136.7 (d,  $J = 9.1$  Hz), 136.1 (d,  $J = 3.4$  Hz), 132.3, 130.3 (d,  $J = 2.8$  Hz), 129.9, 129.7 (d,  $J = 6.3$  Hz), 128.3, 62.3 (d,  $J = 6.7$  Hz), 33.9 (d,  $J = 137$  Hz), 16.4 (d,  $J = 5.8$  Hz).

**$^{31}\text{P}$  NMR (162 MHz,  $\text{CDCl}_3$ ):**  $\delta$  25.2 (s, 1P).

**HRMS (m/z)** calculated for  $\text{C}_{18}\text{H}_{22}\text{O}_4\text{P}^+$  ( $[\text{M}+\text{H}]^+$ ): 333.1250; found: 333.1256.

### Procedure J for the formation of S41

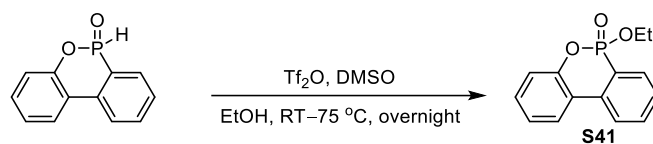

The mixture of the dibenzo[*c,e*][1,2]oxaphosphinine 6-oxide (0.2 mmol, 40.4 mg, 1.0 eq.), Tf<sub>2</sub>O (0.6 mmol, 169.3 mg, 3.0 eq.), and DMSO (0.4 mmol, 31.2 mg, 2.0 eq.) was dissolved in 1.0 mL of EtOH under a N<sub>2</sub> atmosphere. (Tf<sub>2</sub>O and DMSO form an *in situ*

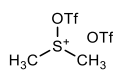 active intermediate to initiate the reaction.) Subsequently, the reaction mixture was heated in a round-bottom flask in a 75 °C oil bath overnight<sup>8</sup>. The progress of the reaction was monitored using TLC. After the completion of the reaction, water was added to quench it, and then the organic phase was extracted and dried under reduced pressure. Finally, the crude product was purified using silica gel column chromatography with petroleum ether/ethyl acetate (4:1–3:1) as the eluent to obtain the purified compound S41.

### 6-Ethoxydibenzo[*c,e*][1,2]oxaphosphinine 6-oxide (S41)

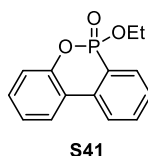

Colorless oil, yield: 77%.

**<sup>1</sup>H NMR (400 MHz, CDCl<sub>3</sub>):** δ 7.94–8.02 (m, 3H), 7.72 (t, *J* = 7.6 Hz, 1H), 7.51–7.55 (m, 1H), 7.40 (t, *J* = 15.2 Hz, 1H), 7.24–7.30 (m, 2H), 4.19–4.27 (m, 2H), 1.29 (t, *J* = 7.2 Hz, 3H).

**<sup>13</sup>C NMR (100 MHz, CDCl<sub>3</sub>):** δ 149.8 (d, *J* = 7.7 Hz), 136.9 (d, *J* = 7 Hz), 133.4 (d, *J* = 2.2 Hz), 130.4, 130.0 (d, *J* = 9.1 Hz), 128.2 (d, *J* = 15.3 Hz), 125.2, 124.6, 123.9 (d, *J* = 12 Hz), 123.3 (d, *J* = 181 Hz), 122.5 (d, *J* = 12 Hz), 120.1, (d, *J* = 6.6 Hz), 62.9 (d, *J* = 6.6 Hz), 16.2 (d, *J* = 5.7 Hz).

**<sup>31</sup>P NMR (162 MHz, CDCl<sub>3</sub>):** δ 10.2 (1P).

**HRMS (m/z)** calculated for C<sub>14</sub>H<sub>14</sub>O<sub>3</sub>P<sup>+</sup> ([M+H]<sup>+</sup>): 261.0675; found: 261.0673.



### General procedure K for the formation of S42–S47, S50–S56,

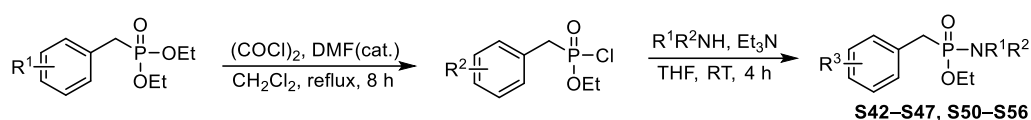

**Step 1:** Under ambient conditions, a 2 M solution of oxalyl chloride (2.0 eq.) was gradually added dropwise to the desired benzyl phosphonate diethyl compound (1.0 eq.). Next, 2 drops of DMF were introduced as a catalyst. The reaction mixture was then heated to 60 °C and refluxed for 8 h<sup>9</sup>. The reaction progress was monitored using <sup>31</sup>P-NMR (the P–Cl compound typically exhibits a chemical shift around 35–45 ppm). Upon completion of the reaction, the solvent and excess oxalyl chloride were removed under reduced pressure. The resulting product can be utilized directly in the subsequent step without requiring further purification.

**Step 2:** The initial product was dissolved in tetrahydrofuran, followed by the slow addition of a mixture of R<sup>1</sup>R<sup>2</sup>NH and Et<sub>3</sub>N, both dissolved in THF, under ice bath conditions. Subsequently, the reaction mixture was allowed to warm up to RT and react for 2 h, with the progress of the reaction monitored by TLC. After the reaction was complete, the precipitate was filtered, and the solvent was removed under reduced pressure. The crude product was then purified using silica gel column chromatography to eliminate the solvent and obtain the purified compounds S42–S47, S50–S56.

### General procedure L for the formation of S48, S49

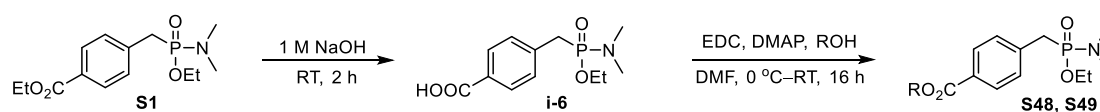

**Step 1:** Compound ethyl 4-(((ethoxyphosphoryl)oxy)methyl)benzoate **S1** (1.0 eq.) was dissolved in a 1 M NaOH aqueous solution (3.0 eq.) and stirred at RT for 2 h. The progress of the reaction was monitored by TLC until the reaction mixture became clear. After the reaction was complete, the mixture was extracted once with CH<sub>2</sub>Cl<sub>2</sub>, and the aqueous phase was acidified with 1 M HCl. Subsequently, CH<sub>2</sub>Cl<sub>2</sub> was added for three extractions, and the organic layer was collected, dried, and concentrated to obtain the carboxylated compound **i-6** resulting from the hydrolysis, which was directly used in the next reaction without purification.

**Step 2:** The carboxylated compound **i-6** (1.0 eq.) was dissolved in CH<sub>2</sub>Cl<sub>2</sub>, and 1-(3-dimethylaminopropyl)-3-ethylcarbodiimide hydrochloride (EDCI, 1.5 eq.) and 4-dimethylaminopyridine (DMAP, 2.0 eq.) were added at 0 °C. Subsequently, the hydroxyl-containing compound (*N*-hydroxysuccinimide or pentafluorophenol) dissolved in CH<sub>2</sub>Cl<sub>2</sub> was slowly added dropwise to the reaction mixture. After the addition was complete, the reaction was allowed to proceed at room temperature for 16 h<sup>10</sup>, and the progress of the reaction was monitored by TLC. Upon completion of the reaction, water was added to quench the reaction, and then the mixture was extracted with CH<sub>2</sub>Cl<sub>2</sub>. The organic layer was collected, dried, and concentrated to remove the organic solvent. Finally, the crude product was purified using silica gel column chromatography (petroleum ether: ethyl acetate = 1:1–2:3) to obtain the purified compounds **S48** and **S49**.

**Ethyl *P*-benzyl-*N,N*-dimethylphosphonamidate (**S42**)**

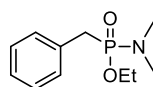

**S42**

Yellowish solid, yield: 79%.

**<sup>1</sup>H NMR (400 MHz, CDCl<sub>3</sub>):** δ 7.27–7.31 (m, 5H), 3.85–4.07 (m, 2H), 3.04–3.19 (m, 2H), 2.52 (d, *J* = 8.8 Hz, 6H), 1.28 (t, *J* = 6.8 Hz, 3H).

**<sup>13</sup>C NMR (100 MHz, CDCl<sub>3</sub>):** δ 132.2 (d, *J* = 8.0 Hz), 129.5 (d, *J* = 6.2 Hz), 128.2 (d, *J* = 2.7 Hz), 126.3 (d, *J* = 3.3 Hz), 59.5 (d, *J* = 7.0 Hz), 36.2 (d, *J* = 3.9 Hz), 33.6 (d, *J* = 124.9 Hz), 16.0 (d, *J* = 6.5 Hz).

**<sup>31</sup>P NMR (162 MHz, CDCl<sub>3</sub>):** δ 31.3 (1P).

**HRMS (m/z)** calculated for C<sub>11</sub>H<sub>19</sub>NO<sub>2</sub>P<sup>+</sup> ([M+H]<sup>+</sup>): 228.1148; found: 228.1141.

**Ethyl *N,N*-dimethyl-*P*-(4-nitrobenzyl)phosphonamidate (**S43**)**

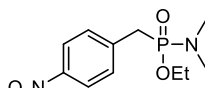

**S43**

Yellowish solid, yield: 87%.

**<sup>1</sup>H NMR (400 MHz, CDCl<sub>3</sub>):** δ 1.23 (t, *J* = 7.2 Hz, 6H), 2.55 (d, *J* = 8.8 Hz, 2H), 3.82–4.02 (m, 2H), 7.39–7.42 (m, 2H), 8.10 (d, *J* = 8.4 Hz, 2H).

**<sup>13</sup>C NMR (100 MHz, CDCl<sub>3</sub>):** δ 16.0 (d, *J* = 6.5 Hz), 33.7 (d, *J* = 123.7 Hz), 36.2 (d, *J* = 4 Hz), 123.5 (d, *J* = 2.7 Hz), 59.9 (d, *J* = 6.9 Hz), 130.4 (d, *J* = 6.0 Hz), 140.6 (d, *J* = 8.2 Hz), 146.7 (d, *J* = 3.6 Hz).

**<sup>31</sup>P NMR (162 MHz, CDCl<sub>3</sub>):** δ 29.0 (1P).

**HRMS (m/z)** calculated for C<sub>11</sub>H<sub>18</sub>N<sub>2</sub>O<sub>4</sub>P<sup>+</sup> ([M+H]<sup>+</sup>): 273.0999; found: 273.1006.

#### Ethyl benzyl(morpholino)phosphinate (S44)

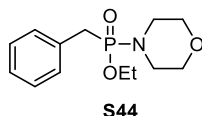

White solid, yield: 72%.

**<sup>1</sup>H NMR (400 MHz, CDCl<sub>3</sub>):** δ 1.34 (t, *J* = 14 Hz, 3H), 2.85–2.96 (m, 4H), 3.08–3.27 (m, 2H), 3.48–3.55 (m, 4H), 4.12–4.18 (m, 2H), 7.26–7.37 (m, 5H).

**<sup>13</sup>C NMR (100 MHz, CDCl<sub>3</sub>):** δ 131.9 (d, *J* = 7.7 Hz), 129.8 (d, *J* = 6.4 Hz), 128.5 (d, *J* = 2.4 Hz), 126.8 (d, *J* = 3.8 Hz), 67.1 (d, *J* = 4.8 Hz), 59.9 (d, *J* = 7.3 Hz), 44.2, 34.1 (d, *J* = 126 Hz), 16.3 (d, *J* = 6.7 Hz).

**<sup>31</sup>P NMR (162 MHz, CDCl<sub>3</sub>):** δ 28.5 (1P).

**HRMS (m/z)** calculated for C<sub>13</sub>H<sub>21</sub>NO<sub>3</sub>P<sup>+</sup> ([M+H]<sup>+</sup>): 270.1254; found: 270.1250.

#### Ethyl benzyl(pyrrolidin-1-yl)phosphinate (S45)

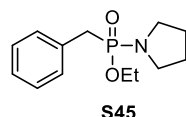

Colorless oil, yield: 70%.

**<sup>1</sup>H NMR (400 MHz, CDCl<sub>3</sub>):** δ 1.29 (t, *J* = 6.8 Hz, 3H), 1.69–1.75 (m, 4H), 3.07–3.09 (m, 2H), 2.95–2.97 (m, 2H), 3.15 (dd, *J* = 28 Hz, 8.8 Hz, 2H), 3.88–4.09 (m, 2H), 7.21–7.24 (m, 1H), 7.29 (d, *J* = 4.4 Hz, 4H).

**<sup>13</sup>C NMR (100 MHz, CDCl<sub>3</sub>):** δ 16.3 (d, *J* = 6.5 Hz), 26.2 (d, *J* = 7.7 Hz), 33.7 (d, *J* = 125 Hz), 46.5 (d, *J* = 4.2 Hz), 59.7 (d, *J* = 6.8 Hz), 126.5 (d, *J* = 3.2 Hz), 128.3 (d, *J* = 2.5 Hz), 129.6 (d, *J* = 6.2 Hz), 132.5 (d, *J* = 8 Hz).

**<sup>31</sup>P NMR (162 MHz, CDCl<sub>3</sub>):** δ 28.5 (1P).

**HRMS (m/z)** calculated for C<sub>13</sub>H<sub>21</sub>NO<sub>2</sub>P<sup>+</sup> ([M+H]<sup>+</sup>): 254.1304; found: 254.1308.

### Ethyl *P*-benzyl-*N*-methyl-*N*-phenylphosphonamidate (S46)

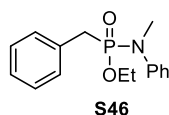

Yellow oil, yield: 26%.

**<sup>1</sup>H NMR (400 MHz, CDCl<sub>3</sub>):** δ 7.21–7.30 (m, 5H), 7.11–7.16 (m, 4H), 7.05–7.08 (m, 1H), 3.94–4.19 (m, 2H), 3.24 (d, *J* = 20 Hz, 2H), 3.0 (d, *J* = 7.6 Hz, 3H), 1.29 (t, *J* = 7.2 Hz, 3H).

**<sup>13</sup>C NMR (100 MHz, CDCl<sub>3</sub>):** δ 144.3 (d, *J* = 4.6 Hz), 131.5 (d, *J* = 8.2 Hz), 129.8 (d, *J* = 6.4 Hz), 128.9, 128.3 (d, *J* = 2.9 Hz), 126.7 (d, *J* = 3.5 Hz), 123.4, 121.8 (d, *J* = 3.4 Hz), 60.4 (d, *J* = 7.0 Hz), 36.2 (d, *J* = 3.8 Hz), 33.7 (d, *J* = 125.6 Hz), 16.1 (d, *J* = 6.7 Hz).

**<sup>31</sup>P NMR (162 MHz, CDCl<sub>3</sub>):** δ 28.4 (1P).

**HRMS (m/z)** calculated for C<sub>16</sub>H<sub>21</sub>NO<sub>2</sub>P<sup>+</sup> ([M+H]<sup>+</sup>): 290.1304; found: 290.1309.

### Ethyl *N,N*-dimethyl-*P*-((perfluorophenyl)methyl)phosphonamidate (S47)

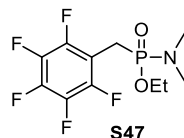

Colorless oil, yield: 36%.

**<sup>1</sup>H NMR (400 MHz, CDCl<sub>3</sub>):** δ 1.29 (t, *J* = 6.8 Hz, 3H), 2.64 (d, *J* = 9.2 Hz, 6H), 3.10–3.17 (m, 2H), 3.88–4.09 (m, 2H).

**<sup>13</sup>C NMR (100 MHz, CDCl<sub>3</sub>):** δ 145.1 (d, *J* = 245.7 Hz), 143.8 (m), 141.2 (m), 138.7 (m), 136.2 (m), 107.5 (m), 60.2 (d, *J* = 6.7 Hz), 35.9 (d, *J* = 4.2 Hz), 20.7 (d, *J* = 128.6 Hz), 15.9 (d, *J* = 6.7 Hz).

**<sup>31</sup>P NMR (162 MHz, CDCl<sub>3</sub>):** δ 26.1 (1P). **<sup>19</sup>F NMR (376 MHz, CDCl<sub>3</sub>):** δ -141.8 (2F), -156.3 (1F), -162.3 (2F).

**HRMS (m/z)** calculated for C<sub>11</sub>H<sub>14</sub>F<sub>5</sub>NO<sub>2</sub>P<sup>+</sup> ([M+H]<sup>+</sup>): 318.0677; found: 318.0671.

### Perfluorophenyl 4-(((dimethylamino)(ethoxy)phosphoryl)methyl)benzoate (S48)

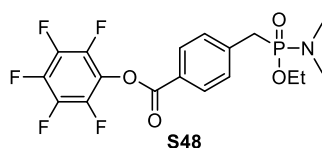

White solid, yield: 43%.

**<sup>1</sup>H NMR (400 MHz, CDCl<sub>3</sub>):** δ 8.13 (d, *J* = 7.6 Hz, 2H), 7.47 (d, *J* = 8.0 Hz, 2H), 3.88–4.09 (m, 2H), 3.12–3.29 (m, 2H), 2.60 (d, *J* = 8.8 Hz, 6H), 1.30 (t, *J* = 7.2 Hz, 3H).

**<sup>13</sup>C NMR (100 MHz, CDCl<sub>3</sub>):** δ 165.6, 162.4, 140.5 (d, *J* = 8.1 Hz), 139.2, 138.2, 136.7, 130.8 (d, *J* = 2.5 Hz), 130.3 (d, *J* = 6 Hz), 125.2 (d, *J* = 3.4 Hz), 59.9 (d, *J* = 6.9 Hz), 36.4 (d, *J* = 4 Hz), 34.1 (d, *J* = 123.6 Hz), 16.2 (d, *J* = 6.6 Hz).

**<sup>31</sup>P NMR (162 MHz, CDCl<sub>3</sub>):** δ 24.1 (1P).

**HRMS (m/z)** calculated for C<sub>18</sub>H<sub>18</sub>F<sub>5</sub>NO<sub>4</sub>P<sup>+</sup> ([M+H]<sup>+</sup>): 438.0888; found: 438.0893.

**2,5-Dioxopyrrolidin-1-yl 4-(((dimethylamino)(ethoxy)phosphoryl)methyl)benzoate (S49)**

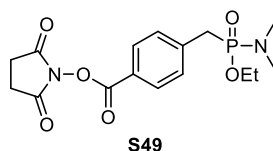

White solid, yield: 55%.

**<sup>1</sup>H NMR (400 MHz, CDCl<sub>3</sub>):** δ 1.14 (t, *J* = 7.2 Hz, 3H), 2.43 (d, *J* = 8.8 Hz, 6H) 2.75 (s, 4H), 3.07 (dd, *J* = 22 Hz, 8.8 Hz, 2H), 3.73–3.93 (m, 2H), 7.31 (d, *J* = 7.2 Hz, 2H), 7.92 (d, *J* = 8.0 Hz, 2H).

**<sup>13</sup>C NMR (100 MHz, CDCl<sub>3</sub>):** δ 169.1, 161.4, 140.5 (d, *J* = 8.1 Hz), 130.2 (d, *J* = 2.4 Hz), 129.9 (d, *J* = 5.9 Hz), 122.9 (d, *J* = 3.1 Hz), 59.5 (d, *J* = 6.8 Hz), 35.9 (d, *J* = 3.9 Hz), 33.8 (d, *J* = 123.3 Hz), 25.3, 15.8 (d, *J* = 6.5 Hz).

**<sup>31</sup>P NMR (162 MHz, CDCl<sub>3</sub>):** δ 29.3 (1P).

**HRMS (m/z)** calculated for C<sub>16</sub>H<sub>22</sub>N<sub>2</sub>O<sub>6</sub>P<sup>+</sup> ([M+H]<sup>+</sup>): 369.1210; found: 369.1213.

**Ethyl *N*-allyl-*P*-benzyl-*N*-(prop-2-yn-1-yl)phosphonamidate (S50)**

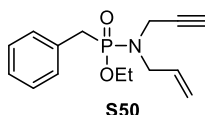

White solid, yield: 56%.

**<sup>1</sup>H NMR (400 MHz, CDCl<sub>3</sub>):** δ 7.27–7.32 (m, 4H), 7.21–7.23 (m, 1H), 5.45–5.55 (m, 1H), 5.16 (dd, *J* = 22.8 Hz, 17.2 Hz, 2H), 3.89–4.10 (m, 2H), 3.51–3.80 (m, 4H), 3.08–3.23 (m, 2H), 1.27 (t, *J* = 7.2 Hz, 3H), 2.20 (s, 1H).

**<sup>13</sup>C NMR (100 MHz, CDCl<sub>3</sub>):** δ 133.5 (d, *J* = 3.1 Hz), 132.0 (d, *J* = 8.7 Hz), 129.9 (d, *J* = 6.3 Hz), 128.4 (d, *J* = 2.8 Hz), 126.6 (d, *J* = 3.4 Hz), 118.5, 79.7, 71.9, 60.14 (d, *J*

= 7 Hz), 47.5 (d,  $J = 3.6$  Hz), 34.8 (d,  $J = 126$  Hz), 34.0, (d,  $J = 5.3$  Hz), 16.1 (d,  $J = 6.9$  Hz).

$^{31}\text{P}$  NMR (162 MHz,  $\text{CDCl}_3$ ):  $\delta$  30.3 (1P).

HRMS ( $m/z$ ) calculated for  $\text{C}_{15}\text{H}_{21}\text{NO}_2\text{P}^+$  ( $[\text{M}+\text{H}]^+$ ): 278.1304; found: 278.1307.

### Procedure M for the formation of S51

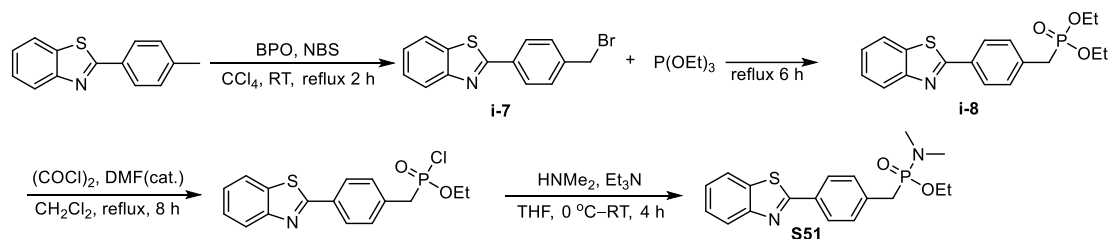

The synthesis methods for preparing **i-7** and **i-8** in **Steps 1** and **2**, respectively, utilize **Procedure A**. The synthesis method for preparing compound **S51** in **Steps 3** and **4** employs **Procedure E**.

### 2-(4-(Bromomethyl)phenyl)benzo[d]thiazole (i-7)

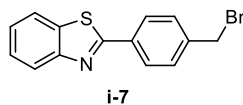

White solid, yield: 97%.

$^1\text{H}$  NMR (400 MHz,  $\text{CDCl}_3$ ):  $\delta$  8.07–8.09 (m, 3H), 7.91 (d,  $J = 8.0$  Hz, 1H), 7.52 (d,  $J = 8.4$  Hz, 3H), 7.40 (t,  $J = 7.2$  Hz, 1H), 4.54 (s, 2H).

$^{13}\text{C}$  NMR (100 MHz,  $\text{CDCl}_3$ ):  $\delta$  167.2, 154.0, 140.6, 135.0, 133.6, 129.7, 127.9, 126.4, 125.4, 123.3, 121.6, 32.5.

HRMS ( $m/z$ ) calculated for  $\text{C}_{14}\text{H}_{11}\text{BrNS}^+$  ( $[\text{M}+\text{H}]^+$ ): 303.9790; found: 303.9793.

### Diethyl (benzo[d]thiazol-2-ylmethyl)phosphonate (i-8)

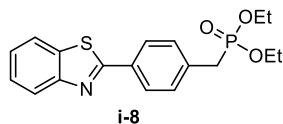

White solid, yield: 77%.

$^1\text{H}$  NMR (400 MHz,  $\text{CDCl}_3$ ):  $\delta$  8.05 (t,  $J = 7.6$  Hz, 3H), 7.90 (d,  $J = 8.0$  Hz, 1H), 7.49 (t,  $J = 7.2$  Hz, 1H), 7.40–7.44 (m, 2H), 7.38 (t,  $J = 7.6$  Hz, 1H), 4.00–4.08 (m, 4H), 3.22 (d,  $J = 22.0$  Hz, 2H), 1.26 (t,  $J = 6.8$  Hz, 6H).

**<sup>13</sup>C NMR (100 MHz, CDCl<sub>3</sub>):** δ 167.7, 154.0, 134.9 (d, *J* = 2.4 Hz), 134.8, 132.3 (d, *J* = 3.5 Hz), 130.4 (d, *J* = 6.5 Hz), 127.7 (d, *J* = 3.0 Hz), 126.3, 125.2, 123.1, 121.6, 62.3 (d, *J* = 6.7 Hz), 33.8 (d, *J* = 137.0 Hz), 16.4 (d, *J* = 6.0 Hz).

**<sup>31</sup>P NMR (162 MHz, CDCl<sub>3</sub>):** δ 25.5 (1P).

**HRMS (m/z)** calculated for C<sub>18</sub>H<sub>21</sub>NO<sub>3</sub>PS<sup>+</sup> ([M+H]<sup>+</sup>): 362.0974; found: 362.0970.

### Ethyl *P*-benzyl-*N,N*-bis(2-chloroethyl)phosphoramidate (S51)

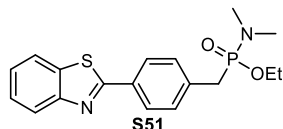

White solid, yield: 64%.

**<sup>1</sup>H NMR (400 MHz, CDCl<sub>3</sub>):** δ 8.02–8.07 (m, 3H), 7.88 (t, *J* = 8.0 Hz, 1H), 7.47 (t, *J* = 7.2 Hz, 1H), 7.35–7.42 (m, 3H), 3.87–4.09 (m, 2H), 3.11–3.25 (m, 2H), 2.57 (d, *J* = 8.8 Hz, 6H), 1.29 (t, *J* = 6.9 Hz, 3H).

**<sup>13</sup>C NMR (100 MHz, CDCl<sub>3</sub>):** δ 167.8, 153.9, 136.0 (d, *J* = 8.2 Hz), 134.9, 131.9 (d, *J* = 3.5 Hz), 130.3 (d, *J* = 6.0 Hz), 127.6 (d, *J* = 2.4 Hz), 126.3, 125.1, 123.0, 121.6, 59.8 (d, *J* = 6.8 Hz), 36.4 (d, *J* = 3.7 Hz), 33.9 (d, *J* = 124.3 Hz), 16.2 (d, *J* = 6.1 Hz).

**<sup>31</sup>P NMR (162 MHz, CDCl<sub>3</sub>):** δ 30.2 (1P).

**HRMS (m/z)** calculated for C<sub>18</sub>H<sub>22</sub>N<sub>2</sub>O<sub>2</sub>PS<sup>+</sup> ([M+H]<sup>+</sup>): 361.1134; found: 361.1139.

### Ethyl benzyl(3*H*-spiro[isobenzofuran-1,4'-piperidin]-1'-yl)phosphinate (S52)

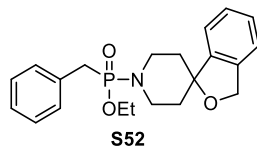

White solid, yield: 78%.

**<sup>1</sup>H NMR (400 MHz, CDCl<sub>3</sub>):** δ 7.30–7.36 (m, 4H), 7.22–7.25 (m, 3H), 7.15–7.18 (m, 1H), 6.93–6.95 (m, 1H), 5.0 (s, 2H), 3.92–4.12 (m, 2H), 3.37–3.43 (m, 2H), 2.93–3.09 (m, 4H), 2.51 (d, *J* = 8.8 Hz, 1H), 1.56–1.64 (m, 3H), 1.31 (t, *J* = 7.2 Hz, 3H).

**<sup>13</sup>C NMR (100 MHz, CDCl<sub>3</sub>):** δ 145.2, 138.7, 132.5 (d, *J* = 7.7 Hz), 129.8, 128.5, 127.7, 127.3, 126.7, 120.8 (d, *J* = 51.3 Hz), 84.5, 70.7, 59.7 (d, *J* = 6.8 Hz), 40.8 (d, *J* = 20.9 Hz), 36.5 (d, *J* = 8.9 Hz), 34.2 (d, *J* = 126.5 Hz), 16.3 (d, *J* = 6.5 Hz).

**<sup>31</sup>P NMR (162 MHz, CDCl<sub>3</sub>):** δ 29.7 (1P).

**HRMS (m/z)** calculated for C<sub>21</sub>H<sub>27</sub>NO<sub>3</sub>P<sup>+</sup> ([M+H]<sup>+</sup>): 372.1723; found: 372.1728.

**Ethyl *P*-benzyl-*N,N*-bis(2-chloroethyl)phosphonamidate (S53)**

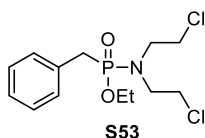

White solid, yield: 54%.

**<sup>1</sup>H NMR (400 MHz, CDCl<sub>3</sub>):** δ 7.25–7.33 (m, 5H), 3.91–4.15 (m, 2H), 3.40 (d, *J* = 6.8 Hz, 4H), 3.08–3.32 (m, 6H), 1.28 (t, *J* = 6.8 Hz, 3H).

**<sup>13</sup>C NMR (100 MHz, CDCl<sub>3</sub>):** 16.2 (d, *J* = 6.6 Hz), 34.3 (d, *J* = 125.4 Hz), 42.17, 48.7 (d, *J* = 4 Hz), 60.5 (d, *J* = 6.8 Hz), 126.9 (d, *J* = 3.4 Hz), 128.6 (d, *J* = 2.7 Hz), 129.7 (d, *J* = 6.4 Hz), δ 131.7 (d, *J* = 8 Hz).

**<sup>31</sup>P NMR (162 MHz, CDCl<sub>3</sub>):** δ 31.0 (1P).

**HRMS (m/z)** calculated for C<sub>13</sub>H<sub>21</sub>Cl<sub>2</sub>NO<sub>2</sub>P<sup>+</sup> ([M+H]<sup>+</sup>): 324.0681; found: 324.0688.

**Ethyl benzyl(4-((5,6-dimethoxy-1-oxo-2,3-dihydro-1*H*-inden-2-yl)methyl)piperidin-1-yl)phosphinate (S54)**

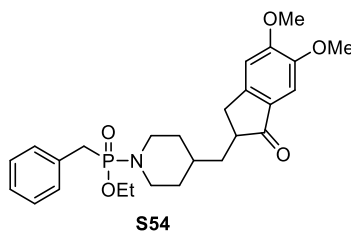

White solid, yield: 69%.

**<sup>1</sup>H NMR (400 MHz, CDCl<sub>3</sub>):** δ 7.27–7.33 (m, 5H), 7.18 (s, 1H), 6.87 (s, 1H), 3.98 (s, 3H), 3.92 (s, 3H), 3.48–3.51 (m, 2H), 3.20–3.26 (m, 2H), 3.05–3.15 (m, 1H), 2.67 (d, *J* = 14.4 Hz, 2H), 2.59–2.61 (m, 1H), 2.38–2.48 (m, 2H), 1.84–1.87 (m, 1H), 1.59–1.70 (m, 3H), 1.28–1.34 (m, 5H), 0.96–1.12 (m, 2H).

**<sup>13</sup>C NMR (100 MHz, CDCl<sub>3</sub>):** δ 207.4, 155.5, 149.4, 148.6, 132.4 (d, *J* = 7.8 Hz), 129.8, (d, *J* = 6.1 Hz), 129.1, 128.3, 126.5, 107.3, 104.4, 59.6 (d, *J* = 6.8 Hz), 56.1 (d, *J* = 12.3 Hz), 44.9 (d, *J* = 5.4 Hz), 44.3 (d, *J* = 10.4 Hz), 38.8 (d, *J* = 10.5 Hz), 34.3, (d, *J* = 126 Hz), 34.4, (d, *J* = 7.8 Hz), 33.2, (d, *J* = 7.1 Hz), 32.1, 16.2 (d, *J* = 6.4 Hz).

**<sup>31</sup>P NMR (162 MHz, CDCl<sub>3</sub>):** δ 29.2 (1P).

**HRMS (m/z)** calculated for C<sub>26</sub>H<sub>35</sub>NO<sub>5</sub>P<sup>+</sup> ([M+H]<sup>+</sup>): 472.2247; found: 472.2245.



**Ethyl benzyl(4-(2-((2,4-dimethylphenyl)thio)phenyl)piperazin-1-yl)phosphinate (S55)**

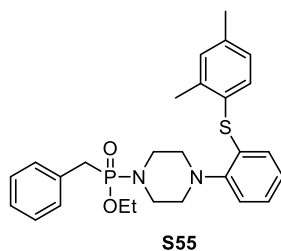

White solid, yield: 51%.

**<sup>1</sup>H NMR (400 MHz, CDCl<sub>3</sub>):** δ 7.29–7.39 (m, 6H), 7.18 (d, *J* = 7.2 Hz, 1H), 7.04–7.128 (m, 2H), 6.98 (d, *J* = 7.6 Hz, 1H), 6.87–6.92 (m, 1H), 6.54 (t, *J* = 7.2 Hz, 1H), 3.99–4.21 (m, 2H), 3.11–3.26 (m, 6H), 2.88–2.93 (m, 4H), 2.36 (dd, *J*<sub>1</sub> = 24.4 Hz, *J*<sub>2</sub> = 7.6 Hz, 6H), 1.34–1.39 (m, 3H).

**<sup>13</sup>C NMR (100 MHz, CDCl<sub>3</sub>):** δ 149.0, 142.3, 139.2, 136.1, 134.6, 131.3 (d, *J* = 8.1 Hz), 131.6, 129.9 (d, *J* = 6.0 Hz), 128.5, 127.8, 126.7, 126.2, 125.4, 124.5, 119.9, 59.8 (d, *J* = 6.6 Hz), 53.4, 52.1, 44.5, 34.3 (d, *J* = 125.8 Hz), 20.8 (d, *J* = 61.1 Hz), 16.3 (d, *J* = 6.3 Hz).

**<sup>31</sup>P NMR (162 MHz, CDCl<sub>3</sub>):** δ 29.9 (1P).

**HRMS (m/z)** calculated for C<sub>27</sub>H<sub>34</sub>N<sub>2</sub>O<sub>2</sub>PS<sup>+</sup> ([M+H]<sup>+</sup>): 481.2073; found: 481.2073.

**Ethyl *P*-(4-(((1-(tert-butyl)-5-chloro-6-oxo-1,6-dihydropyridazin-4-yl)oxy)methyl)benzyl)-*N,N*-dimethylphosphonamidate (S56)**

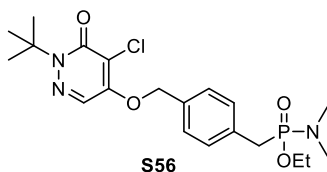

White solid, yield: 49%.

**<sup>1</sup>H NMR (400 MHz, CDCl<sub>3</sub>):** δ 7.70 (s, 1H), 7.31–7.36 (m, 4H), 5.29 (s, 2H), 3.84–4.03 (m, 2H), 3.08–3.17 (m, 2H), 2.55 (d, *J* = 8.8 Hz, 6H), 1.62 (s, 9H), 1.28, (t, *J* = 7.2 Hz, 3H).

**<sup>13</sup>C NMR (100 MHz, CDCl<sub>3</sub>):** δ 159.0, 153.6, 133.3 (d, *J* = 8.1 Hz), 133.2 (d, *J* = 3.7 Hz), 130.3 (d, *J* = 6.1 Hz), 127.3 (d, *J* = 2.8 Hz), 125.1, 118.3, 71.6, 66.4, 59.7 (d, *J* = 7.0 Hz), 36.4 (d, *J* = 3.9 Hz), 33.4 (d, *J* = 124.9 Hz), 27.8, 16.2 (d, *J* = 6.6 Hz).

**<sup>31</sup>P NMR (162 MHz, DMSO-*d*<sub>6</sub>):** δ 30.8 (1P).

**HRMS (m/z)** calculated for C<sub>20</sub>H<sub>30</sub>ClN<sub>3</sub>O<sub>4</sub>P<sup>+</sup> ([M+H]<sup>+</sup>): 442.1657; found: 442.1655.

## Procedure N for the formation of S57

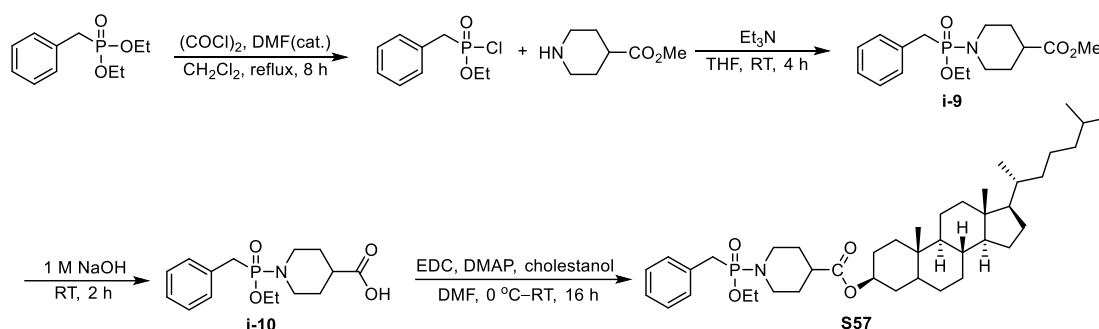

The synthetic methods for preparing **i-9** in **steps 1** and **2** are consistent with the aforementioned "General **procedure B** for the formation of **S2**."

**Step 3:** Compound **i-9** (1.0 eq.), which is 1-(benzyloxycarbonyl) piperidine-4-carboxylic acid methyl ester, was dissolved in a 1 M NaOH aqueous solution (3.0 eq.) and stirred at RT for 2 h. The progress of the reaction was monitored using TLC until the reaction mixture became clear. Upon completion of the reaction, the mixture was subjected to a single extraction with dichloromethane, and the resulting aqueous phase was acidified using 1 M HCl. Then,  $\text{CH}_2\text{Cl}_2$  was added for three extractions, and the organic layer was collected, dried, and concentrated to obtain the carboxylated compound **i-10** through hydrolysis.

**Step 4:** Compound **i-10** (1.0 eq.) carboxylate was dissolved in DMF, and 1-(3-dimethylaminopropyl)-3-ethylcarbodiimide hydrochloride (EDCI 1.5 eq.) and DMAP (2.0 eq.) were added at  $0^\circ\text{C}$ . Then, the hydroxyl-containing compound cholestanol was slowly added to the reaction mixture dissolved in DMF. After the addition was complete, the reaction was allowed to proceed at room temperature for 16 h, and the progress of the reaction was monitored by TLC. Upon completion of the reaction, the organic solvent was removed under reduced pressure, and the residue was purified using silica gel column chromatography with a mixture of petroleum ether and ethyl acetate (1:1–2:3) as the eluent to remove the solvent and obtain the purified compound **S57**.

### Methyl 1-(benzyl(ethoxy)phosphoryl)piperidine-4-carboxylate (**i-9**)

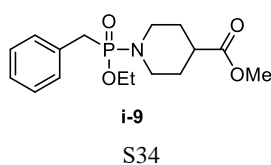

White solid, yield: 86%.

**<sup>1</sup>H NMR (400 MHz, CDCl<sub>3</sub>):** δ 1.30 (t, *J* = 7.2 Hz, 3H), 1.39–1.54 (m, 2H), 1.78 (t, *J* = 11.6 Hz, 2H), 2.31–2.65 (m, 3H), 3.03–3.23 (m, 2H), 3.37–3.47 (m, 2H), 3.67 (s, 3H), 4.05–4.11 (m, 2H), 7.24–7.30 (m, 5H).

**<sup>13</sup>C NMR (100 MHz, CDCl<sub>3</sub>):** δ 174.8, 132.2 (d, *J* = 7.9 Hz), 129.7 (d, *J* = 6.4 Hz), 128.3 (d, *J* = 2.4 Hz), 126.6 (d, *J* = 3.2 Hz), 59.7 (d, *J* = 6.9 Hz), 51.6, 43.5, 40.9, 34.2 (d, *J* = 125.6 Hz), 28.4 (dd, *J* = 8.3 Hz, 3.9 Hz), 16.2 (d, *J* = 6.5 Hz).

**<sup>31</sup>P NMR (162 MHz, CDCl<sub>3</sub>):** δ 29.1 (1P).

**HRMS (m/z)** calculated for C<sub>16</sub>H<sub>25</sub>NO<sub>4</sub>P<sup>+</sup> ([M+H]<sup>+</sup>): 326.1516; found: 326.1511.

### 1-(Benzyl(ethoxy)phosphoryl)piperidine-4-carboxylic acid (i-10)

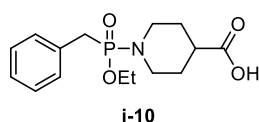

White solid, yield: 82%.

**<sup>1</sup>H NMR (400 MHz, MeOD):** δ 7.22–7.27 (m, 5H), 6.04 (s, 1H), 3.88–4.11 (m, 2H), 3.34–3.45 (m, 2H), 3.04–3.23 (m, 2H), 2.29–2.64 (m, 3H), 1.79 (t, *J* = 11.2 Hz, 2H), 1.40–1.52 (m, 2H), 1.28 (t, *J* = 7.2 Hz, 3H).

**<sup>13</sup>C NMR (100 MHz, MeOD):** δ 177.8, 131.9 (d, *J* = 8.1 Hz), 129.8 (d, *J* = 6.4 Hz), 128.4 (d, *J* = 2.6 Hz), 126.7 (d, *J* = 3.2 Hz), 60.2 (d, *J* = 7.0 Hz), 43.6, 40.8, 34.3 (d, *J* = 125.9 Hz), 28.3 (dd, *J* = 10.4 Hz, 3.7 Hz), 16.2 (d, *J* = 6.5 Hz).

**<sup>31</sup>P NMR (162 MHz, MeOD):** δ 29.7 (1P).

**HRMS (m/z)** calculated for C<sub>15</sub>H<sub>23</sub>NO<sub>4</sub>P<sup>+</sup> ([M+H]<sup>+</sup>): 312.1359; found: 312.1361.

### (3*S*,8*R*,9*S*,10*S*,13*R*,14*S*,17*R*)-10,13-Dimethyl-17-((*R*)-6-methylheptan-2-yl)hexadecahydro-1*H*-cyclopenta[*a*]phenanthren-3-yl 1-(benzyl(ethoxy)phosphoryl)piperidine-4-carboxylate (S57)

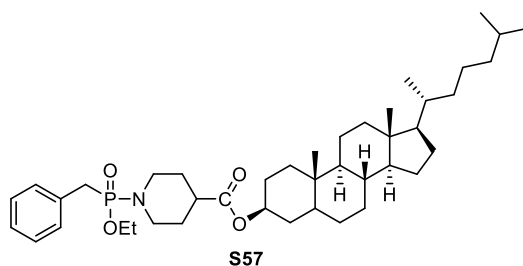

White solid, yield: 40%.

**<sup>1</sup>H NMR (400 MHz, DMSO-*d*<sub>6</sub>):** δ 7.27–7.29 (m, 4H), 7.22–7.23 (m, 1H), 4.04–4.09

(m, 1H), 3.34–3.50 (m, 2H), 3.01–3.21 (m, 1H), 2.24–2.64 (m, 2H), 1.91–2.04 (m, 2H), 1.61–1.83 (m, 8H), 1.46–1.53 (m, 6H), 1.21–1.42 (m, 15H), 0.97–1.04 (m, 11H), 0.90 (d,  $J = 6.4$  Hz, 3H), 0.86 (d,  $J = 6.4$  Hz, 6H), 0.81 (s, 3H), 0.64 (s, 3H).

**$^{13}\text{C}$  NMR (100 MHz,  $\text{DMSO-}d_6$ ):**  $\delta$  174.1, 132.3 (d,  $J = 7.8$  Hz), 129.8 (d,  $J = 6.3$  Hz), 128.4 (d,  $J = 2.7$  Hz), 126.7 (d,  $J = 3.3$  Hz), 73.7, 59.7 (d,  $J = 6.9$  Hz), 56.3 (d,  $J = 13.6$  Hz), 54.2, 48.9, 44.6, 43.6, 42.6, 41.3, 39.9, 39.5, 36.7, 36.1, 35.8, 35.4 (d,  $J = 2.1$  Hz), 34.3 (d,  $J = 125.3$  Hz), 33.9, 31.9, 28.6, 28.5, 28.4 (d,  $J = 3.5$  Hz), 28.2, 27.9, 27.4, 25.6, 24.9, 24.2, 23.8, 22.6 (d,  $J = 25.1$  Hz), 21.2, 18.6, 16.3 (d,  $J = 6.6$  Hz), 12.1 (d,  $J = 16.1$  Hz).

**$^{31}\text{P}$  NMR (162 MHz,  $\text{DMSO-}d_6$ ):**  $\delta$  29.0 (1P).

**HRMS (m/z)** calculated for  $\text{C}_{42}\text{H}_{69}\text{NO}_4\text{P}^+$  ( $[\text{M}+\text{H}]^+$ ): 682.4959; found: 682.4953.

## 2.2.2 Representative procedure for the fluorination of alkyl phosphonates

### General procedure for the synthesis of ethyl phosphorofluoridate

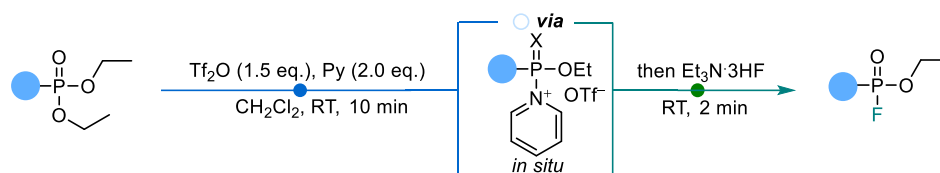

The diethyl phosphonate compound (0.2 mmol) was dissolved in 1 mL of  $\text{CH}_2\text{Cl}_2$  at RT, and then  $\text{Tf}_2\text{O}$  (0.3 mmol, 50.5  $\mu\text{L}$ , 1.5 eq.) was added to the reaction mixture for 5 min, followed by  $\text{Py}$  (0.4 mmol, 32  $\mu\text{L}$ , 2.0 eq.) for an additional 5 min. Following this, the fluorinating reagent  $\text{Et}_3\text{N}\cdot 3\text{HF}$  (0.5 eq.) was introduced into the system. The progress of the reaction was monitored using TLC or  $^{31}\text{P}$  NMR, and after 2 min, the reaction was completed. The reaction mixture, with a volume of approximately 1 mL, underwent direct purification through silica gel column chromatography to afford the desired products **4–30**.

### General procedure for the synthesis of fluorophosphoramidate

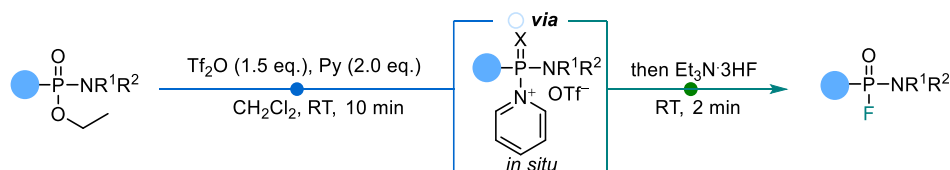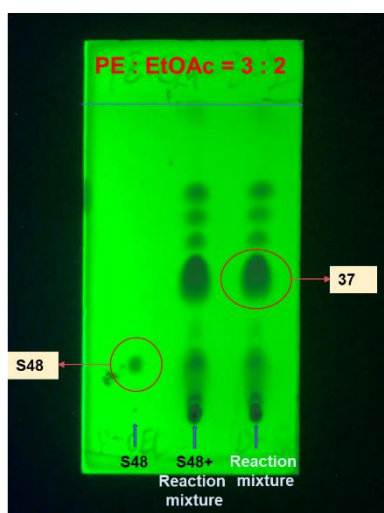

**Fig. S3:** Thin Layer Chromatography (TLC) analysis of the synthesis of fluorophosphoramidate (**37**) from phosphoramidate ethyl ester (**S43**).

The phosphonic acid monoethyl ester compound (0.2 mmol) was dissolved in 1 mL of  $\text{CH}_2\text{Cl}_2$  at RT. Subsequently,  $\text{Tf}_2\text{O}$  (0.3 mmol, 50.5  $\mu\text{L}$ , 1.5 eq.) was added dropwise,

and the reaction proceeded for 5 min. Following this, Py (0.4 mmol, 32  $\mu$ L, 2.0 eq.) was slowly introduced to the reaction mixture, and the reaction was allowed to continue for an additional 5 min. Then, the fluorinating reagent Et<sub>3</sub>N·3HF (0.5 eq.) was incorporated into the system. The progress of the reaction was monitored using TLC or <sup>31</sup>P NMR, and after 2 min, the reaction reached completion. The reaction mixture, with an approximate volume of 1 mL, underwent direct purification through silica gel column chromatography to eliminate the solvent and obtain the purified compounds **1**, **31–46**.

### Ethyl 4-(((dimethylamino)fluorophosphoryl)methyl)benzoate (**1**)

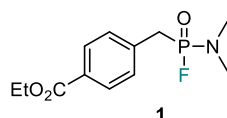

White solid, yield: 92%.

**<sup>1</sup>H NMR (400 MHz, CDCl<sub>3</sub>):**  $\delta$  7.97 (d,  $J$  = 7.6 Hz, 2H), 7.34 (d,  $J$  = 2.0 Hz, 2H), 7.32 (d,  $J$  = 2.4 Hz, 2H), 4.31–4.36 (m, 2H), 3.23–3.38 (m, 2H), 2.60 (dd,  $J$  = 2.4 Hz, 10.0 Hz), 1.35 (t,  $J$  = 7.2 Hz, 3H).

**<sup>13</sup>C NMR (100 MHz, CDCl<sub>3</sub>):**  $\delta$  166.1, 135.7 (dd,  $J$  = 2.4 Hz, 8.6 Hz), 129.9 (d,  $J$  = 2.9 Hz), 129.5, 129.4, 60.9, 35.8, 32.7 (dd,  $J$  = 32.9 Hz, 129.0 Hz), 14.2.

**<sup>31</sup>P NMR (162 MHz, CDCl<sub>3</sub>):**  $\delta$  32.64 (d,  $J$  = 1050.9 Hz, 1P).

**<sup>19</sup>F NMR (376 MHz, CDCl<sub>3</sub>):**  $\delta$  -66.37 (d,  $J$  = 1049.8 Hz, 1F).

**HRMS (m/z)** calculated for C<sub>12</sub>H<sub>18</sub>NFO<sub>3</sub>P<sup>+</sup> ([M+H]<sup>+</sup>): 274.1003, found 274.1007.

### Diphenylphosphinic fluoride (**2**)

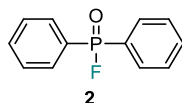

Colorless oil, yield: 68%.

**<sup>1</sup>H NMR (400 MHz, CDCl<sub>3</sub>):**  $\delta$  7.26–7.58 (m, 6H), 7.78–7.83 (m, 4H).

**<sup>13</sup>C NMR (100 MHz, CDCl<sub>3</sub>):**  $\delta$  133.2 (d,  $J$  = 7 Hz), 131.3 (d,  $J$  = 11.2 Hz), 128.7 (d,  $J$  = 14 Hz), 128.6 (dd,  $J$  = 140.4 Hz, 22.1 Hz).

**<sup>31</sup>P NMR (162 MHz, CDCl<sub>3</sub>):**  $\delta$  40.8 (d,  $J$  = 1020 Hz, 1P).

**<sup>19</sup>F NMR (376 MHz, CDCl<sub>3</sub>):**  $\delta$  -75.1 (d,  $J$  = 1020 Hz, 1F).

**HRMS (m/z)** calculated for C<sub>12</sub>H<sub>10</sub>FN<sub>0</sub>OP<sup>+</sup> ([M+Na]<sup>+</sup>): 243.0346; found: 243.0340.

### Diphenylphosphinothioic fluoride (3)

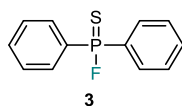

Colorless oil, yield: 83%.

$^1\text{H NMR}$  (400 MHz,  $\text{CDCl}_3$ ):  $\delta$  7.84–7.89 (m, 4H), 7.56–7.59 (m, 2H), 7.47–7.52 (m, 4H).

$^{13}\text{C NMR}$  (100 MHz,  $\text{CDCl}_3$ ):  $\delta$  132.8 (d,  $J = 2.6$  Hz), 131.0 (d,  $J = 12.3$  Hz), 128.7 (d,  $J = 14.1$  Hz), 53.4.

$^{31}\text{P NMR}$  (162 MHz,  $\text{CDCl}_3$ ):  $\delta$  102.2 (d,  $J = 1022$  Hz, 1P).

$^{19}\text{F NMR}$  (376 MHz,  $\text{CDCl}_3$ ):  $\delta$  -82.6 (d,  $J = 1022$  Hz, 1F).

HRMS ( $m/z$ ) calculated for  $\text{C}_{12}\text{H}_{10}\text{FNaPS}^+$  ( $[\text{M}+\text{Na}]^+$ ): 259.0117; found: 259.0113.

### Methyl 4-((ethoxyfluorophosphoryl)methyl)benzoate (4)

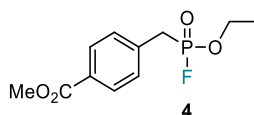

Colorless oil, yield: 42%.

$^1\text{H NMR}$  (400 MHz,  $\text{CDCl}_3$ ):  $\delta$  8.02 (d,  $J = 8.0$  Hz, 2H), 7.38 (d,  $J = 6.8$  Hz, 2H), 4.17–4.24 (m, 2H), 3.92 (s, 3H), 3.36 (d,  $J = 23.2$  Hz, 2H), 1.29 (t,  $J = 7.2$  Hz, 3H).

$^{13}\text{C NMR}$  (100 MHz,  $\text{CDCl}_3$ ):  $\delta$  166.6, 134.7 (d,  $J = 10.6$  Hz), 130.1 (d,  $J = 2.7$  Hz), 129.8, 129.7, 64.2 (d,  $J = 7.4$  Hz), 52.1 (d,  $J = 20.5$  Hz), 32.4 (dd,  $J = 141.7$  Hz, 25 Hz), 16.2 (d,  $J = 5.4$  Hz).

$^{31}\text{P NMR}$  (162 MHz,  $\text{CDCl}_3$ ):  $\delta$  23.7 (d,  $J = 1078$  Hz, 1P).

$^{19}\text{F NMR}$  (376 MHz,  $\text{CDCl}_3$ ):  $\delta$  -65.4 (d,  $J = 1077$  Hz, 1F).

HRMS ( $m/z$ ) calculated for  $\text{C}_{11}\text{H}_{15}\text{FO}_4\text{P}^+$  ( $[\text{M}+\text{H}]^+$ ): 261.0687; found: 261.0683.

### Ethyl benzylphosphonofluoridate (5)

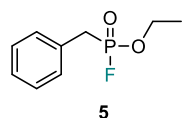

Colorless oil, yield: 73%.

$^1\text{H NMR}$  (400 MHz,  $\text{CDCl}_3$ ):  $\delta$  1.28 (t,  $J = 7.2$  Hz, 3H), 3.30 (d,  $J = 22.4$  Hz, 2H), 4.15–4.23 (m, 2H), 7.29–7.36 (m, 5H).

$^{13}\text{C NMR}$  (100 MHz,  $\text{CDCl}_3$ ):  $\delta$  129.7 (d,  $J = 7$  Hz), 129.4 (d,  $J = 9.8$  Hz), 128.8 (d,  $J$

= 2.9 Hz), 127.5 (d,  $J = 3.6$  Hz), 63.9 (d,  $J = 7.3$  Hz), 32.2 (d,  $J = 141.7$  Hz, 24.6 Hz), 16.2 (d,  $J = 5.5$  Hz).

$^{31}\text{P}$  NMR (162 MHz,  $\text{CDCl}_3$ ):  $\delta$  25.1 (d,  $J = 1077$  Hz, 1P).

$^{19}\text{F}$  NMR (376 MHz,  $\text{CDCl}_3$ ):  $\delta$  -64.3 (d,  $J = 1076$  Hz, 1F).

HRMS ( $m/z$ ) calculated for  $\text{C}_9\text{H}_{13}\text{FO}_2\text{P}^+$  ( $[\text{M}+\text{H}]^+$ ): 203.0632; found: 203.0638.

### Ethyl (4-fluorobenzyl)phosphonofluoridate (6)

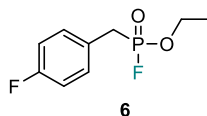

Colorless oil, yield: 91%.

$^1\text{H}$  NMR (400 MHz,  $\text{CDCl}_3$ ):  $\delta$  1.30 (t,  $J = 7.2$  Hz, 3H), 3.28 (d,  $J = 22.4$  Hz, 2H), 4.17–4.24 (m, 2H), 7.03 (t,  $J = 8.4$  Hz, 2H), 7.26–7.27 (m, 2H).

$^{13}\text{C}$  NMR (100 MHz,  $\text{CDCl}_3$ ):  $\delta$  162.3 (dd,  $J = 245$  Hz, 4 Hz), 131.2 (t,  $J = 7.7$  Hz), 125.1 (d,  $J = 35.1$  Hz), 115.8 (dd,  $J = 21.6$  Hz, 2.9 Hz), 63.9 (d,  $J = 7.3$  Hz), 31.3 (dd,  $J = 142.7$  Hz, 24.8 Hz), 16.2 (d,  $J = 5.2$  Hz).

$^{19}\text{F}$  NMR (376 MHz,  $\text{CDCl}_3$ ):  $\delta$  -64.5 (d,  $J = 1078$  Hz, 1F), -114.7 (d,  $J = 5.3$  Hz, 1F).

$^{31}\text{P}$  NMR (162 MHz,  $\text{CDCl}_3$ ):  $\delta$  24.5 (d,  $J = 1078$  Hz, 1P).

HRMS ( $m/z$ ) calculated for  $\text{C}_9\text{H}_{12}\text{F}_2\text{O}_2\text{P}^+$  ( $[\text{M}+\text{H}]^+$ ): 221.0537; found: 221.0535.

### Ethyl (4-chlorobenzyl)phosphonofluoridate (7)

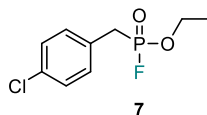

Colorless oil, yield: 77%.

$^1\text{H}$  NMR (400 MHz,  $\text{CDCl}_3$ ):  $\delta$  1.29 (t,  $J = 6.8$  Hz, 3H), 3.26 (d,  $J = 22.8$  Hz, 2H), 4.16–4.24 (m, 2H), 7.21–7.24 (m, 2H), 7.31 (d,  $J = 8.4$  Hz, 2H).

$^{13}\text{C}$  NMR (100 MHz,  $\text{CDCl}_3$ ):  $\delta$  16.2 (d,  $J = 5.3$  Hz), 31.6 (dd,  $J = 142.5$  Hz, 24.9 Hz), 64.1 (d,  $J = 7.4$  Hz), 127.9 (d,  $J = 9.9$  Hz), 129.0 (d,  $J = 3$  Hz), 130.9 (d,  $J = 7.1$  Hz), 133.6 (d,  $J = 4.5$  Hz).

$^{31}\text{P}$  NMR (162 MHz,  $\text{CDCl}_3$ ):  $\delta$  24.2 (d,  $J = 1078$  Hz, 1P).

$^{19}\text{F}$  NMR (376 MHz,  $\text{CDCl}_3$ ):  $\delta$  -64.1 (d,  $J = 1077$  Hz, 1F).

HRMS ( $m/z$ ) calculated for  $\text{C}_9\text{H}_{12}\text{ClFO}_2\text{P}^+$  ( $[\text{M}+\text{H}]^+$ ): 237.0242; found: 237.0245.



### Ethyl (4-bromobenzyl)phosphonofluoridate (8)

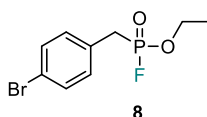

Colorless oil, yield: 87%.

**<sup>1</sup>H NMR (400 MHz, CDCl<sub>3</sub>):** δ 1.29 (t, *J* = 7.2 Hz, 3H), 3.25 (d, *J* = 22.8 Hz, 2H), 4.16–4.24 (m, 2H), 7.16–7.18 (m, 2H), 7.46 (d, *J* = 8.4 Hz, 2H).

**<sup>13</sup>C NMR (100 MHz, CDCl<sub>3</sub>):** δ 132.0 (d, *J* = 2.8 Hz), 131.3 (d, *J* = 7.1 Hz), 128.5 (d, *J* = 9.8 Hz), 121.7 (d, *J* = 4.8 Hz), 64.1 (d, *J* = 7.3 Hz), 31.6 (dd, *J* = 142.3 Hz, 24.8 Hz), 16.2 (d, *J* = 5.5 Hz).

**<sup>19</sup>F NMR (376 MHz, CDCl<sub>3</sub>):** δ -64.1 (d, *J* = 1077 Hz, 1F).

**<sup>31</sup>P NMR (162 MHz, CDCl<sub>3</sub>):** δ 24.2 (d, *J* = 1078 Hz, 1P).

**HRMS (m/z)** calculated for C<sub>9</sub>H<sub>12</sub>BrFO<sub>2</sub>P<sup>+</sup> ([M+H]<sup>+</sup>): 280.9737; found: 280.9731.

### Ethyl (4-iodobenzyl)phosphonofluoridate (9)

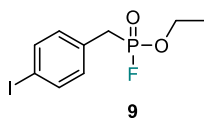

Colorless oil, yield: 76%.

**<sup>1</sup>H NMR (400 MHz, CDCl<sub>3</sub>):** δ 1.30 (t, *J* = 6.8 Hz, 3H), 3.23 (d, *J* = 21.6 Hz, 2H), 4.16–4.24 (m, 2H), 7.04 (d, *J* = 8 Hz, 2H), 7.66 (d, *J* = 7.2 Hz, 2H).

**<sup>13</sup>C NMR (100 MHz, CDCl<sub>3</sub>):** δ 137.9 (d, *J* = 2.7 Hz), 131.5 (d, *J* = 6.9 Hz), 129.2 (d, *J* = 9.5 Hz), 93.1 (d, *J* = 5 Hz), 64.0 (d, *J* = 7.4 Hz), 31.8 (dd, *J* = 142.2 Hz, 24.7 Hz), 16.2 (d, *J* = 5.3 Hz).

**<sup>31</sup>P NMR (162 MHz, CDCl<sub>3</sub>):** δ 23.9 (d, *J* = 1078 Hz, 1P).

**<sup>19</sup>F NMR (376 MHz, CDCl<sub>3</sub>):** δ -63.9 (d, *J* = 1078 Hz, 1F).

**HRMS (m/z)** calculated for C<sub>9</sub>H<sub>12</sub>FIO<sub>2</sub>P<sup>+</sup> ([M+H]<sup>+</sup>): 328.9598; found: 328.9593.

### Ethyl (4-nitrobenzyl)phosphonofluoridate (10)

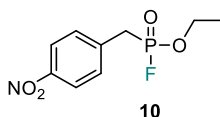

Colorless oil, yield: 55%.

**<sup>1</sup>H NMR (400 MHz, CDCl<sub>3</sub>):** δ 1.31 (t, *J* = 6.8 Hz, 3H), 3.41 (d, *J* = 23.6 Hz, 2H), 4.19–4.27 (m, 2H), 7.48 (dd, *J* = 8.8 Hz, 2.4 Hz, 2H), 8.20 (d, *J* = 8.4 Hz, 2H).

**<sup>13</sup>C NMR (100 MHz, CDCl<sub>3</sub>):** δ 16.2 (d, *J* = 5.4 Hz), 32.2 (dd, *J* = 141.7 Hz, 25.4 Hz), 64.4 (d, *J* = 7.3 Hz), 123.9 (d, *J* = 2.7 Hz), 130.6 (d, *J* = 6.8 Hz), 137.2 (d, *J* = 9.7 Hz), 147.4 (d, *J* = 3.9 Hz).

**<sup>31</sup>P NMR (162 MHz, CDCl<sub>3</sub>):** δ 22.5 (d, *J* = 1078 Hz, 1P).

**<sup>19</sup>F NMR (376 MHz, CDCl<sub>3</sub>):** δ -62.9 (d, *J* = 1077 Hz, 1F).

**HRMS (m/z)** calculated for C<sub>9</sub>H<sub>12</sub>FNO<sub>4</sub>P<sup>+</sup> ([M+H]<sup>+</sup>): 248.0482; found: 248.0486.

### Ethyl (4-cyanobenzyl)phosphonofluoridate (11)

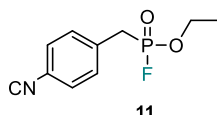

Colorless oil, yield: 74%.

**<sup>1</sup>H NMR (400 MHz, CDCl<sub>3</sub>):** δ 1.30 (t, *J* = 7.2 Hz, 3H), 3.36 (d, *J* = 23.6 Hz, 2H), 4.19–4.27 (m, 2H), 7.42 (d, *J* = 7.6 Hz, 2H), 7.64 (d, *J* = 7.6 Hz, 2H).

**<sup>13</sup>C NMR (100 MHz, CDCl<sub>3</sub>):** δ 16.2 (d, *J* = 5.4 Hz), 32.5 (dd, *J* = 142 Hz, 25.3 Hz), 64.3 (d, *J* = 7.2 Hz), 111.7 (d, *J* = 3.9 Hz), 118.3, 130.5 (d, *J* = 7 Hz), 132.6 (d, *J* = 2.9 Hz), 135.1 (d, *J* = 9.6 Hz).

**<sup>31</sup>P NMR (162 MHz, CDCl<sub>3</sub>):** δ 22.8 (d, *J* = 1078 Hz, 1P).

**<sup>19</sup>F NMR (376 MHz, CDCl<sub>3</sub>):** δ -65.0 (d, *J* = 1078 Hz, 1F).

**HRMS (m/z)** calculated for C<sub>10</sub>H<sub>12</sub>FNO<sub>2</sub>P<sup>+</sup> ([M+H]<sup>+</sup>): 228.0584; found: 228.0587.

### Ethyl (4-methylbenzyl)phosphonofluoridate (12)

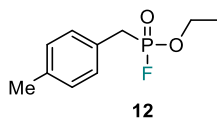

Colorless oil, yield: 89%.

**<sup>1</sup>H NMR (400 MHz, CDCl<sub>3</sub>):** δ 1.29 (t, *J* = 7.2 Hz, 3H), 2.33 (s, 3H), 3.26 (d, *J* = 22.4 Hz, 2H), 4.15–4.22 (m, 2H), 7.13–7.19 (m, 4H).

**<sup>13</sup>C NMR (100 MHz, CDCl<sub>3</sub>):** δ 137.2 (d, *J* = 3.9 Hz), 129.5, 129.4, 126.2 (d, *J* = 9.9 Hz), 63.8 (d, *J* = 7.3 Hz), 31.7 (dd, *J* = 141.7 Hz, 24.3 Hz), 21.0, 16.2 (d, *J* = 5.4 Hz).

**<sup>31</sup>P NMR (162 MHz, CDCl<sub>3</sub>):** δ 25.4 (d, *J* = 1078 Hz, 1P).

**<sup>19</sup>F NMR (376 MHz, CDCl<sub>3</sub>):** δ -64.7 (d, *J* = 1076 Hz, 1F).

**HRMS (m/z)** calculated for C<sub>10</sub>H<sub>15</sub>FO<sub>2</sub>P<sup>+</sup> ([M+H]<sup>+</sup>): 217.0788; found: 217.0782.

### Ethyl (4-methoxybenzyl)phosphonofluoridate (13)

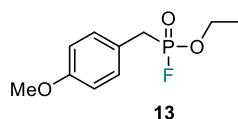

Colorless oil, yield: 43%.

**<sup>1</sup>H NMR (400 MHz, CDCl<sub>3</sub>):** δ 7.24–7.31 (m, 2H), 6.89–6.92 (m, 2H), 4.20–4.22 (m, 2H), 3.80 (s, 3H), 3.23–3.30 (m, 2H), 1.30–1.34 (m, 3H).

**<sup>13</sup>C NMR (100 MHz, CDCl<sub>3</sub>):** δ 159.0, 130.7, 121.1, 114.3, 63.8, 55.2, 31.2 (dd, *J* = 143.1 Hz, 25.1 Hz), 16.2.

**<sup>31</sup>P NMR (162 MHz, CDCl<sub>3</sub>):** δ 25.4 (d, *J* = 1078 Hz, 1P).

**<sup>19</sup>F NMR (376 MHz, CDCl<sub>3</sub>):** δ -65.0 (d, *J* = 1078 Hz, 1F).

**HRMS (m/z)** calculated for C<sub>10</sub>H<sub>15</sub>FO<sub>3</sub>P<sup>+</sup> ([M+H]<sup>+</sup>): 233.0737; found: 233.0733.

### Ethyl (3-methoxybenzyl)phosphonofluoridate (14)

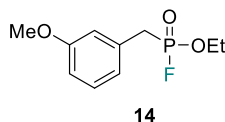

Colorless oil, yield: 76%.

**<sup>1</sup>H NMR (400 MHz, CDCl<sub>3</sub>):** δ 7.22–7.26 (m, 1H), 6.86–6.89 (m, 1H), 6.81–6.84 (m, 2H), 4.15–4.23 (m, 2H), 3.8 (s, 3H), 3.23–3.30 (m, 2H), 1.3 (t, *J* = 7.1 Hz, 3H).

**<sup>13</sup>C NMR (100 MHz, CDCl<sub>3</sub>):** δ 159.8 (d, *J* = 3.2 Hz), 130.7 (d, *J* = 9.8 Hz), 129.8 (d, *J* = 3.4 Hz), 122.0 (d, *J* = 7.2 Hz), 115.3 (d, *J* = 7.1 Hz), 113.0 (d, *J* = 3.8 Hz), 63.9 (d, *J* = 7.4 Hz), 55.2, 32.2 (dd, *J* = 142.4, 24.4 Hz), 16.2 (d, *J* = 5.6 Hz).

**<sup>31</sup>P NMR (162 MHz, CDCl<sub>3</sub>):** δ 24.9 (d, *J* = 1076.6 Hz, 1P).

**<sup>19</sup>F NMR (376 MHz, CDCl<sub>3</sub>):** δ -64.2 (d, *J* = 1076.1 Hz, 1F).

**HRMS (m/z)** calculated for C<sub>10</sub>H<sub>15</sub>FO<sub>3</sub>P<sup>+</sup> ([M+H]<sup>+</sup>): 233.0737; found: 233.0728.

### Ethyl (3-methylbenzyl)phosphonofluoridate (15)

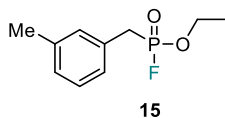

Colorless oil, yield: 74%.

**<sup>1</sup>H NMR (400 MHz, CDCl<sub>3</sub>):** δ 7.20–7.26 (m, 1H), 7.11 (s, 3H), 4.15–4.23 (m, 2H), 3.26 (dd, *J* = 22.4 Hz, 2 Hz, 2H), 2.34 (s, 3H), 1.27–1.29 (m, 3H).

**<sup>13</sup>C NMR (100 MHz, CDCl<sub>3</sub>):** δ 138.5 (d, *J* = 3 Hz), 130.4 (d, *J* = 7 Hz), 129.2 (d, *J* =

9.8 Hz), 128.5 (dd,  $J = 40.4$  Hz, 2.7 Hz), 126.7 (d,  $J = 7$  Hz), 63.9 (d,  $J = 7.2$  Hz), 32.1 (dd,  $J = 141.6$  Hz, 24.2 Hz), 21.3, 16.2 (d,  $J = 5.3$  Hz).

$^{31}\text{P}$  NMR (162 MHz,  $\text{CDCl}_3$ ):  $\delta$  25.3 (d,  $J = 1077$  Hz, 1P).

$^{19}\text{F}$  NMR (376 MHz,  $\text{CDCl}_3$ ):  $\delta$  -64.3 (d,  $J = 1077$  Hz, 1F).

HRMS ( $m/z$ ) calculated for  $\text{C}_{10}\text{H}_{15}\text{FO}_2\text{P}^+$  ( $[\text{M}+\text{H}]^+$ ): 217.0788; found: 217.0781.

### Ethyl (3-nitrobenzyl)phosphonofluoridate (16)

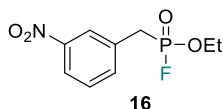

Colorless oil, yield: 77%.

$^1\text{H}$  NMR (600 MHz,  $\text{CDCl}_3$ ):  $\delta$  8.19–8.15 (m, 1H), 7.66–7.67 (m, 1H), 7.54 (t,  $J = 8.0$  Hz, 1H), 4.22–4.28 (m, 1H), 3.41 (d,  $J = 23.2$  Hz, 1H), 1.32 (t,  $J = 7.1$  Hz, 2H).

$^{13}\text{C}$  NMR (151 MHz,  $\text{CDCl}_3$ ):  $\delta$  148.5, 135.7 (d,  $J = 6.6$  Hz), 131.7 (d,  $J = 9.5$  Hz), 129.9 (d,  $J = 3.3$  Hz), 124.6 (d,  $J = 7.6$  Hz), 122.7 (d,  $J = 3.3$  Hz), 64.4 (d,  $J = 7.6$  Hz), 31.9 (dd,  $J = 143.7$ , 25.6 Hz), 16.2 (d,  $J = 5.6$  Hz).

$^{31}\text{P}$  NMR (243 MHz,  $\text{CDCl}_3$ ):  $\delta$  22.9 (d,  $J = 1077.1$  Hz, 1P).

$^{19}\text{F}$  NMR (565 MHz,  $\text{CDCl}_3$ ):  $\delta$  -63.3 (d,  $J = 1078.6$  Hz, 1F).

HRMS ( $m/z$ ) calculated for  $\text{C}_9\text{H}_{12}\text{FNO}_4\text{P}^+$  ( $[\text{M}+\text{H}]^+$ ): 248.0482; found: 248.0487.

### Ethyl (3-acetylbenzyl)phosphonofluoridate (17)

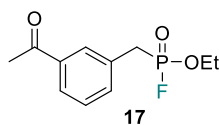

Colorless oil, yield: 47%.

$^1\text{H}$  NMR (400 MHz,  $\text{CDCl}_3$ ):  $\delta$  7.9 (s, 2H), 7.5 (d,  $J = 8.0$  Hz, 1H), 7.4 (t,  $J = 7.8$  Hz, 1H), 4.17–4.25 (m, 2H), 3.4 (d,  $J = 22.9$  Hz, 2H), 2.6 (s, 3H), 1.3 (t,  $J = 7.6$  Hz, 3H).

$^{13}\text{C}$  NMR (100 MHz,  $\text{CDCl}_3$ ):  $\delta$  191.1, 133.0 (d,  $J = 7.8$  Hz), 130.7 (d,  $J = 10.7$  Hz), 129.4 (d,  $J = 3.9$  Hz), 128.4 (d,  $J = 8.2$  Hz), 126.4 (d,  $J = 4.5$  Hz), 124.9, 64.2 (d,  $J = 8.3$  Hz), 32.1 (dd,  $J = 143.1$ , 25.7 Hz), 29.6, 16.2 (d,  $J = 6.4$  Hz).

$^{31}\text{P}$  NMR (162 MHz,  $\text{CDCl}_3$ ):  $\delta$  23.8 (d,  $J = 1077.3$  Hz, 1P).

$^{19}\text{F}$  NMR (376 MHz,  $\text{CDCl}_3$ ):  $\delta$  -63.8 (d,  $J = 1077.3$  Hz, 1F).

HRMS ( $m/z$ ) calculated for  $\text{C}_{11}\text{H}_{15}\text{FO}_3\text{P}^+$  ( $[\text{M}+\text{H}]^+$ ): 245.0737; found: 245.0731.

### Ethyl (2-methylbenzyl)phosphonofluoridate (18)

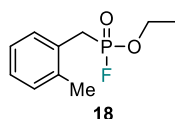

Colorless oil, yield: 66%.

**<sup>1</sup>H NMR (400 MHz, CDCl<sub>3</sub>):** δ 1.21 (t, *J* = 6.8 Hz, 3H), 2.31 (s, 3H), 3.23 (d, *J* = 22.8 Hz, 2H), 4.07–4.15 (m, 2H), 7.11–7.12 (m, 3H), 7.16–7.19 (m, 2H).

**<sup>13</sup>C NMR (100 MHz, CDCl<sub>3</sub>):** δ 16.2 (d, *J* = 5.5 Hz), 19.8, 29.5 (dd, *J* = 141.4 Hz, 24.2 Hz), 63.8 (d, *J* = 7.4 Hz), 126.3 (d, *J* = 3.4 Hz), 127.7 (d, *J* = 3.9 Hz), 130.5 (d, *J* = 5.9 Hz), 130.7 (d, *J* = 3.2 Hz), 137.0 (d, *J* = 2.7 Hz).

**<sup>31</sup>P NMR (162 MHz, CDCl<sub>3</sub>):** δ 25.3 (d, *J* = 1079 Hz, 1P).

**<sup>19</sup>F NMR (376 MHz, CDCl<sub>3</sub>):** δ -63.5 (d, *J* = 1079 Hz, 1F).

**HRMS (m/z)** calculated for C<sub>10</sub>H<sub>15</sub>FO<sub>2</sub>P<sup>+</sup> ([M+H]<sup>+</sup>): 217.0788; found: 217.0791.

### Ethyl (2-nitrobenzyl)phosphonofluoridate (19)

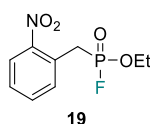

Colorless oil, yield: 32%.

**<sup>1</sup>H NMR (400 MHz, CDCl<sub>3</sub>):** δ 8.04 (d, *J* = 8.4 Hz, 1H), 7.58–7.62 (m, 1H), 7.47–7.50 (m, 2H), 4.18–4.25 (m, 2H), 3.77–3.97 (m, 2H), 1.29 (t, *J* = 7.2 Hz, 3H).

**<sup>13</sup>C NMR (100 MHz, CDCl<sub>3</sub>):** δ 149.0, 133.5 (d, *J* = 4.2 Hz), 133.1 (d, *J* = 7.3 Hz), 128.8 (d, *J* = 4.5 Hz), 125.6 (d, *J* = 3.9 Hz), 125.3 (d, *J* = 11.0 Hz), 64.4 (d, *J* = 8.1 Hz), 29.4 (dd, *J* = 143.5, 26.2 Hz), 16.1 (d, *J* = 6.4 Hz).

**<sup>31</sup>P NMR (162 MHz, CDCl<sub>3</sub>):** δ 22.3 (d, *J* = 1079.1, 1P).

**<sup>19</sup>F NMR (376 MHz, CDCl<sub>3</sub>):** δ -62.7 (d, *J* = 1077.7 Hz, 1F).

**HRMS (m/z)** calculated for C<sub>9</sub>H<sub>12</sub>FNO<sub>4</sub>P<sup>+</sup> ([M+H]<sup>+</sup>): 248.0482; found: 248.0485.

### Ethyl (2-cyanobenzyl)phosphonofluoridate (20)

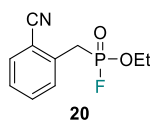

Colorless oil, yield: 43%.

**<sup>1</sup>H NMR (400 MHz, CDCl<sub>3</sub>):** δ 7.66–7.68 (m, 1H), 7.52–7.61 (m, 2H), 7.39–7.42 (m, 1H), 4.24–4.28 (m, 2H), 3.56 (d, *J* = 23.6 Hz, 2H), 1.31 (t, *J* = 7.2 Hz, 3H).

**<sup>13</sup>C NMR (100 MHz, CDCl<sub>3</sub>):** δ 133.6 (d, *J* = 10.2 Hz), 133.1 (d, *J* = 6.1 Hz), 133.0 (d, *J* = 6.5 Hz), 130.9 (d, *J* = 6.5 Hz), 128.2 (d, *J* = 4.5 Hz), 117.2 (d, *J* = 3.1 Hz), 113.5 (d, *J* = 8.6 Hz), 64.5 (d, *J* = 8.0 Hz), 30.8 (dd, *J* = 143.7, 26.6 Hz), 16.1 (d, *J* = 6.5 Hz).

**<sup>31</sup>P NMR (162 MHz, CDCl<sub>3</sub>):** δ 21.8 (d, *J* = 1078.5 Hz, 1P).

**<sup>19</sup>F NMR (376 MHz, CDCl<sub>3</sub>):** δ -62.9 (d, *J* = 1078.1 Hz, 1F).

**HRMS (m/z)** calculated for C<sub>10</sub>H<sub>12</sub>FNO<sub>2</sub>P<sup>+</sup> ([M+H]<sup>+</sup>): 228.0584; found: 228.0567.

### Ethyl (2-fluorobenzyl)phosphonofluoridate (21)

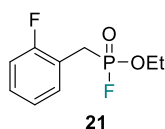

Colorless oil, yield: 81%.

**<sup>1</sup>H NMR (400 MHz, CDCl<sub>3</sub>):** δ 7.27–7.38 (m, 1H), 7.27–7.31 (m, 1H), 7.06–7.15 (m, 2H), 4.19–4.26 (m, 2H), 3.36 (dd, *J* = 22.8, 3.2 Hz, 2H), 1.31 (t, *J* = 7.2 Hz, 3H).

**<sup>13</sup>C NMR (100 MHz, CDCl<sub>3</sub>):** δ 160.8 (dd, *J* = 247.4, 7.8 Hz), 131.6 (dd, *J* = 5.9, 3.2 Hz), 129.5 (dd, *J* = 8.0, 3.9 Hz), 124.4 (t, *J* = 3.7 Hz), 117.0 (dd, *J* = 15.5, 10.1 Hz), 115.7 (dd, *J* = 21.8, 3.2 Hz), 64.1 (d, *J* = 7.2 Hz), 25.1 (ddd, *J* = 145.6, 26.5, 3.5 Hz), 16.2 (d, *J* = 5.6 Hz).

**<sup>31</sup>P NMR (162 MHz, CDCl<sub>3</sub>):** δ 23.7 (d, *J* = 1077.9, 5.18 Hz, 1P).

**<sup>19</sup>F NMR (376 MHz, CDCl<sub>3</sub>):** δ -64.0 (d, *J* = 1076.1 Hz, 1F), -116.8 (s, 1F).

**HRMS (m/z)** calculated for C<sub>9</sub>H<sub>12</sub>F<sub>2</sub>O<sub>2</sub>P<sup>+</sup> ([M+H]<sup>+</sup>): 221.0537; found: 221.0531.

### Ethyl (naphthalen-1-ylmethyl)phosphonofluoridate (22)

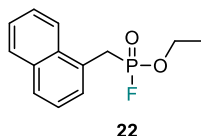

Colorless oil, yield: 70%.

**<sup>1</sup>H NMR (400 MHz, CDCl<sub>3</sub>):** δ 1.19 (t, *J* = 7.2 Hz, 3H), 3.78 (dd, *J* = 23.2 Hz, 2.4 Hz, 2H), 4.09–4.16 (m, 2H), 7.43–7.53 (m, 3H), 7.57 (t, *J* = 7.2 Hz, 1H), 7.82 (d, *J* = 7.6 Hz, 1H), 7.87 (d, *J* = 8 Hz, 1H), 8.03 (d, *J* = 8.4 Hz, 1H).

**<sup>13</sup>C NMR (100 MHz, CDCl<sub>3</sub>):** δ 133.9 (d, *J* = 2.8 Hz), 131.7 (d, *J* = 5.5 Hz), 128.8, 128.6 (d, *J* = 8.1 Hz), 128.5 (d, *J* = 4.4 Hz), 126.5, 125.9, 125.8 (d, *J* = 10.8 Hz), 125.3 (d, *J* = 4.2 Hz), 123.8, 64.0 (d, *J* = 7.3 Hz), 29.2 (dd, *J* = 142.6 Hz, 24.9 Hz), 16.1 (d, *J* = 4.3 Hz).

**<sup>31</sup>P NMR (162 MHz, CDCl<sub>3</sub>):** δ 24.8 (d, *J* = 1081 Hz, 1P).

**<sup>19</sup>F NMR (376 MHz, CDCl<sub>3</sub>):** δ -62.9 (d, *J* = 1080 Hz, 1F).

**HRMS (m/z)** calculated for C<sub>13</sub>H<sub>15</sub>FO<sub>2</sub>P<sup>+</sup> ([M+H]<sup>+</sup>): 253.0788; found: 253.0781.

### Ethyl benzhydrylphosphonofluoridate (23)

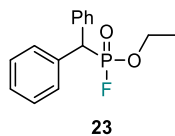

Colorless oil, yield: 42%.

**<sup>1</sup>H NMR (400 MHz, CDCl<sub>3</sub>):** δ 1.19 (t, *J* = 6.8 Hz, 3H), 4.06–4.21 (m, 2H), 4.60 (d, *J* = 27.2 Hz, 2H), 7.30 (d, *J* = 6.4 Hz, 2H), 7.35 (t, *J* = 7.2 Hz, 4H), 7.50 (d, *J* = 7.2 Hz, 4H).

**<sup>13</sup>C NMR (100 MHz, CDCl<sub>3</sub>):** δ 16.0 (d, *J* = 4.3 Hz), 49.9 (dd, *J* = 141.3 Hz, 22.9 Hz), 64.6 (d, *J* = 6.9 Hz), 127.7, 128.9, 129.2 (dd, *J* = 18 Hz, 8.5 Hz), 134.9 (d, *J* = 3.7 Hz).

**<sup>31</sup>P NMR (162 MHz, CDCl<sub>3</sub>):** δ 23.4 (d, *J* = 1094 Hz, 1P).

**<sup>19</sup>F NMR (376 MHz, CDCl<sub>3</sub>):** δ -64.2 (d, *J* = 1094 Hz, 1F).

**HRMS (m/z)** calculated for C<sub>15</sub>H<sub>17</sub>FO<sub>2</sub>P<sup>+</sup> ([M+H]<sup>+</sup>): 279.0945; found: 279.0947.

### Ethyl (thiophen-2-ylmethyl)phosphonofluoridate (24)

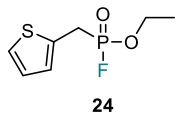

Colorless oil, yield: 51%.

**<sup>1</sup>H NMR (400 MHz, CDCl<sub>3</sub>):** δ 7.15–7.19 (m, 1H), 6.90–6.95 (m, 2H), 4.14–4.22 (m, 2H), 3.45 (dd, *J* = 21.2 Hz, 6.4 Hz, 2H), 1.24 (t, *J* = 7.2 Hz, 3H).

**<sup>13</sup>C NMR (100 MHz, CDCl<sub>3</sub>):** δ 129.6 (d, *J* = 11.3 Hz), 127.9 (d, *J* = 8.8 Hz), 127.3, 125.5, 64.3 (d, *J* = 7.1 Hz), 26.6 (dd, *J* = 148 Hz, 27.5 Hz), 16.2 (d, *J* = 4.3 Hz).

**<sup>31</sup>P NMR (162 MHz, CDCl<sub>3</sub>):** δ 22.6 (d, *J* = 1080 Hz, 1P).

**<sup>19</sup>F NMR (376 MHz, CDCl<sub>3</sub>):** δ -64.8 (d, *J* = 1080 Hz, 1F).

**HRMS (m/z)** calculated for C<sub>7</sub>H<sub>11</sub>FO<sub>2</sub>PS<sup>+</sup> ([M+H]<sup>+</sup>): 209.0196; found: 209.0197.

### Ethyl phenylphosphonofluoridate (25)

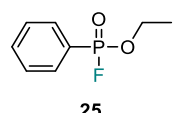

Colorless oil, yield: 59%.

**<sup>1</sup>H NMR (400 MHz, CDCl<sub>3</sub>):** δ 1.42 (t, *J* = 7.2 Hz, 3H), 4.30–4.38 (m, 2H), 7.52 (dd, *J* = 12.4 Hz, 7.2 Hz, 2H), 7.64 (t, *J* = 7.6 Hz, 1H), 7.85 (dd, *J* = 14.4 Hz, 8 Hz, 2H).

**<sup>13</sup>C NMR (100 MHz, CDCl<sub>3</sub>):** δ 133.6 (d, *J* = 2.7 Hz), 131.7 (d, *J* = 10.8 Hz), 128.7 (d, *J* = 16.3 Hz), 123.8 (d, *J* = 29.9 Hz), 63.9 (d, *J* = 6.1 Hz), 16.3 (d, *J* = 5.7 Hz).

**<sup>31</sup>P NMR (162 MHz, CDCl<sub>3</sub>):** δ 17.1 (d, *J* = 1043 Hz, 1P).

**<sup>19</sup>F NMR (376 MHz, CDCl<sub>3</sub>):** δ -63.9 (d, *J* = 1042 Hz, 1F).

**HRMS (m/z)** calculated for C<sub>8</sub>H<sub>11</sub>FO<sub>2</sub>P<sup>+</sup> ([M+H]<sup>+</sup>): 189.0475; found: 189.0471.

### Ethyl (naphtho[1,2-*d*]thiazol-2-ylmethyl)phosphonofluoridate (26)

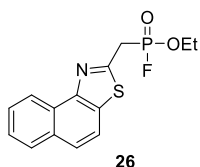

Colorless oil, yield: 45%.

**<sup>1</sup>H NMR (600 MHz, CDCl<sub>3</sub>):** δ 8.78 (d, *J* = 8.2 Hz, 1H), 7.95 (d, *J* = 8.1 Hz, 1H), 7.87 (d, *J* = 8.8 Hz, 1H), 7.83 (d, *J* = 8.8 Hz, 1H), 7.68 (t, *J* = 7.2 Hz, 1H), 7.59 (t, *J* = 7.2 Hz, 1H), 4.33–4.40 (m, 2H), 4.00 (dd, *J* = 22.9, 2.3 Hz, 2H), 1.38 (t, *J* = 7.1 Hz, 3H).

**<sup>13</sup>C NMR (151 MHz, CDCl<sub>3</sub>):** δ 156.9 (dd, *J* = 9.7, 1.9 Hz), 149.3 (d, *J* = 1.9 Hz), 132.6 (d, *J* = 1.9 Hz), 132.0, 128.5, 128.1, 127.2, 126.4, 126.3, 123.8, 118.6, 65.0 (d, *J* = 7.4 Hz), 31.6 (dd, *J* = 146.0, 27.7 Hz), 16.3 (d, *J* = 5.9 Hz).

**<sup>31</sup>P NMR (243 MHz, CDCl<sub>3</sub>):** δ 19.5 (d, *J* = 1073.7 Hz, 1P).

**<sup>19</sup>F NMR (565 MHz, CDCl<sub>3</sub>):** δ -61.6 (d, *J* = 1075.0 Hz, 1F).

**HRMS (m/z)** calculated for C<sub>14</sub>H<sub>14</sub>FNO<sub>2</sub>PS<sup>+</sup> ([M+H]<sup>+</sup>): 310.0461; found: 310.0455.

### Ethyl (4-(((1-(tert-butyl)-5-chloro-6-oxo-1,6-dihydropyridazin-4-yl)oxy)methyl)benzyl)phosphonofluoridate (27)

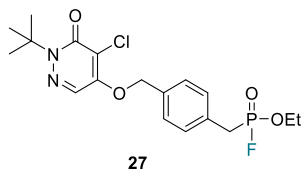

Colorless oil, yield: 57%.

**<sup>1</sup>H NMR (600 MHz, CDCl<sub>3</sub>):** δ 7.71 (s, 1H), 7.38 (d, *J* = 7.9 Hz, 2H), 7.33–7.35 (m, 2H), 5.29 (s, 2H), 4.17–4.22 (m, 2H), 3.28–3.30 (m, 2H), 1.61 (s, 9H), 1.28 (t, *J* = 7.1 Hz, 3H).



**<sup>13</sup>C NMR (151 MHz, CDCl<sub>3</sub>):** δ 159.0, 153.6, 134.3 (d, *J* = 4.3 Hz), 130.2 (d, *J* = 6.8 Hz), 130.1 (d, *J* = 10.0 Hz), 127.5 (d, *J* = 3.8 Hz), 125.0, 118.3, 71.4, 66.4, 64.0 (d, *J* = 7.6 Hz), 31.9 (dd, *J* = 142.7, 24.4 Hz), 27.8, 16.2 (d, *J* = 5.5 Hz).

**<sup>31</sup>P NMR (243 MHz, CDCl<sub>3</sub>):** δ 24.5 (d, *J* = 1077.4 Hz, 1P).

**<sup>19</sup>F NMR (565 MHz, CDCl<sub>3</sub>):** δ -64.0 (d, *J* = 1077.9 Hz, 1F).

**HRMS (m/z)** calculated for C<sub>18</sub>H<sub>24</sub>ClFN<sub>2</sub>O<sub>4</sub>P<sup>+</sup> ([M+H]<sup>+</sup>): 417.1141; found: 417.1146.

### Ethyl ((1-(4-(4-fluorophenyl)pyrimidin-5-yl)piperidin-4-yl)methyl)phosphonofluoridate (28)

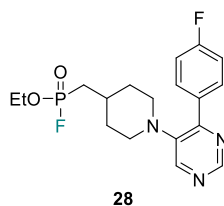

Colorless oil, yield: 50%.

**<sup>1</sup>H NMR (600 MHz, CDCl<sub>3</sub>):** δ 8.89 (s, 1H), 8.40 (s, 1H), 8.09–8.11 (m, 2H), 7.15 (t, *J* = 8.7 Hz, 2H), 4.23–4.31 (m, 2H), 3.16–3.21 (m, 2H), 2.67 (t, *J* = 11.4 Hz, 2H), 1.91–1.93 (m, 1H), 1.87–1.90 (m, 3H), 1.67 (s, 3H), 1.38 (t, *J* = 7.0 Hz, 3H).

**<sup>13</sup>C NMR (151 MHz, CDCl<sub>3</sub>):** δ 164.4, 162.8, 156.6, 152.7, 147.3, 143.9, 134.0, 130.3 (d, *J* = 7.9 Hz), 115.5 (d, *J* = 22.0 Hz), 63.2 (d, *J* = 7.6 Hz), 50.7, 46.7, 32.9 (d, *J* = 11.5 Hz), 31.1 (dd, *J* = 142.4, 21.3 Hz), 29.7, 16.3 (d, *J* = 5.5 Hz).

**<sup>31</sup>P NMR (243 MHz, CDCl<sub>3</sub>):** δ 29.7 (d, *J* = 1072.0 Hz, 1P).

**<sup>19</sup>F NMR (376 MHz, CDCl<sub>3</sub>):** δ -60.3 (d, *J* = 1072.9 Hz, 1F), -110.4 (s, 1F).

**HRMS (m/z)** calculated for C<sub>18</sub>H<sub>23</sub>F<sub>2</sub>N<sub>3</sub>O<sub>2</sub>P<sup>+</sup> ([M+H]<sup>+</sup>): 382.1490; found: 382.1483.

### Ethyl (4-benzoylbenzyl)phosphonofluoridate (29)

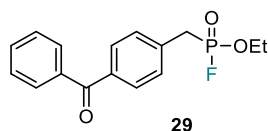

Colorless oil, yield: 78%.

**<sup>1</sup>H NMR (400 MHz, DMSO-*d*<sub>6</sub>):** δ 7.78 (d, *J* = 8.0 Hz, 4H), 7.59 (t, *J* = 7.2 Hz, 1H), 7.48 (t, *J* = 7.2 Hz, 2H), 7.42 (d, *J* = 6.8 Hz, 2H), 4.20–4.28 (m, 2H), 3.39 (d, *J* = 23.6 Hz, 2H), 1.32 (t, *J* = 6.8 Hz, 3H).

**<sup>13</sup>C NMR (100 MHz, DMSO-*d*<sub>6</sub>):** δ 196.0, 137.3, 136.8, 134.2 (d, *J* = 9.7 Hz), 132.5, 130.6 (d, *J* = 2.7 Hz), 129.9, 129.6 (d, *J* = 20.0 Hz), 128.3 (d, *J* = 14.5 Hz), 64.2 (d, *J* =

7.5 Hz), 32.44 (dd,  $J_1 = 141.5$  Hz,  $J_2 = 25.0$  Hz), 16.2.

$^{31}\text{P}$  NMR (162 MHz,  $\text{DMSO-}d_6$ ):  $\delta$  23.8 (d,  $J = 1077$  Hz, 1P).

$^{19}\text{F}$  NMR (376 MHz,  $\text{CDCl}_3$ ):  $\delta$  -63.43 (d,  $J = 1077$  Hz, 1F).

HRMS ( $m/z$ ) calculated for  $\text{C}_{16}\text{H}_{17}\text{FO}_3\text{P}^+$  ( $[\text{M}+\text{H}]^+$ ): 307.0894; found: 307.0899.

### 6-Fluorodibenzo[*c,e*][1,2]oxaphosphinine 6-oxide (30)

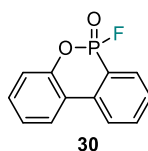

Colorless oil, yield: 67%.

$^1\text{H}$  NMR (400 MHz,  $\text{CDCl}_3$ ):  $\delta$  7.29–7.36 (m, 2H), 7.44 (t,  $J = 3.9$  Hz, 1H), 7.56–7.61 (m, 1H), 7.82 (t,  $J = 8$  Hz, 1H), 7.97–8.12 (m, 3H).

$^{13}\text{C}$  NMR (100 MHz,  $\text{CDCl}_3$ ):  $\delta$  149.3 (d,  $J = 8.3$  Hz), 137.5 (d,  $J = 7.9$  Hz), 134.9, 131.0 (t,  $J = 4.6$  Hz), 128.6 (d,  $J = 16.4$  Hz), 125.6, 125.3, 124.3 (d,  $J = 13$  Hz), 121.7 (d,  $J = 12.7$  Hz), 120.3 (d,  $J = 7.3$  Hz), 119.5 (d,  $J = 28.9$  Hz), 117.7, (d,  $J = 29$  Hz).

$^{31}\text{P}$  NMR (162 MHz,  $\text{CDCl}_3$ ):  $\delta$  7.3 (d,  $J = 1074$  Hz, 1P).

$^{19}\text{F}$  NMR (376 MHz,  $\text{CDCl}_3$ ):  $\delta$  -55.4 (d,  $J = 1073$  Hz, 1F).

HRMS ( $m/z$ ) calculated for  $\text{C}_{12}\text{H}_9\text{FO}_2\text{P}^+$  ( $[\text{M}+\text{H}]^+$ ): 235.0319; found: 235.0325.

### *P*-benzyl-*N,N*-dimethylphosphonamidic fluoride (31)

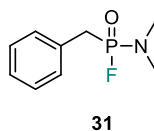

Colorless oil, yield: 67%.

$^1\text{H}$  NMR (400 MHz,  $\text{CDCl}_3$ ):  $\delta$  7.32–7.37 (m, 5H), 3.24–3.38 (m, 2H), 2.65 (d,  $J = 9.6$ , 6H).

$^{13}\text{C}$  NMR (100 MHz,  $\text{CDCl}_3$ ):  $\delta$  130.4 (dd,  $J = 8.6, 2.2$  Hz), 129.4 (d,  $J = 6.6$  Hz), 128.7, 127.2, 35.74 (d,  $J = 4.1$  Hz), 32.5 (dd,  $J = 32.0, 129.4$  Hz).

$^{31}\text{P}$  NMR (162 MHz,  $\text{CDCl}_3$ ):  $\delta$  34.1 (d,  $J = 1049$  Hz, 1P).

$^{19}\text{F}$  NMR (376 MHz,  $\text{CDCl}_3$ ):  $\delta$  -67.3 (d,  $J = 1049$  Hz, 1F).

HRMS ( $m/z$ ) calculated for  $\text{C}_9\text{H}_{14}\text{FNOP}^+$  ( $[\text{M}+\text{H}]^+$ ): 202.0792; found: 202.0797.

### *N,N*-Dimethyl-*P*-(4-nitrobenzyl)phosphonamidic fluoride (32)

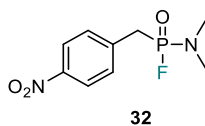

Yellowish solid, yield: 65%.

**<sup>1</sup>H NMR (400 MHz, CDCl<sub>3</sub>):** δ 8.18 (d, *J* = 8 Hz, 2H), 7.47 (d, *J* = 7.6 Hz, 2H), 3.29–3.45 (m, 2H), 2.68 (d, *J* = 9.6 Hz, 6H).

**<sup>13</sup>C NMR (100 MHz, CDCl<sub>3</sub>):** δ 147.2 (d, *J* = 3.5 Hz), 138.4 (d, *J* = 8.5 Hz), 130.4 (d, *J* = 6.5 Hz), 123.9 (d, *J* = 2.4 Hz), 35.8 (d, *J* = 3.8 Hz), 32.5 (dd, *J* = 129.2 Hz, 33.7 Hz). **<sup>31</sup>P NMR (162 MHz, CDCl<sub>3</sub>):** δ 31.5 (d, *J* = 1053 Hz, 1P).

**<sup>19</sup>F NMR (376 MHz, CDCl<sub>3</sub>):** δ -68.1 (d, *J* = 1050 Hz, 1F).

**HRMS (m/z)** calculated for C<sub>12</sub>H<sub>9</sub>FO<sub>2</sub>P<sup>+</sup> ([M+H]<sup>+</sup>): 247.0642; found: 247.0644.

### Benzyl(morpholino)phosphinic fluoride (33)

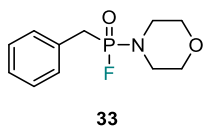

White solid, yield: 61%.

**<sup>1</sup>H NMR (400 MHz, CDCl<sub>3</sub>):** δ 7.33–7.40 (m, 5H), 3.56–3.60 (m, 4H), 3.25–3.43 (m, 2H), 3.07–3.16 (m, 4H).

**<sup>13</sup>C NMR (100 MHz, CDCl<sub>3</sub>):** δ 130.1 (d, *J* = 8.6 Hz), 129.6 (d, *J* = 6.8 Hz), 128.9 (d, *J* = 2.7 Hz), 127.5 (d, *J* = 3.5 Hz), 66.9 (d, *J* = 4.1 Hz), 43.9, 38.9 (dd, *J* = 129.9 Hz, 31.3 Hz).

**<sup>31</sup>P NMR (162 MHz, CDCl<sub>3</sub>):** δ 31.0 (d, *J* = 1055 Hz, 1P).

**<sup>19</sup>F NMR (376 MHz, CDCl<sub>3</sub>):** δ -65.5 (d, *J* = 1055 Hz, 1F).

**HRMS (m/z)** calculated for C<sub>12</sub>H<sub>9</sub>FO<sub>2</sub>P<sup>+</sup> ([M+H]<sup>+</sup>): 244.0897; found: 244.0906.

### Benzyl(pyrrolidin-1-yl)phosphinic fluoride (34)

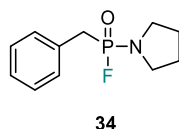

White solid, yield: 51%.

**<sup>1</sup>H NMR (400 MHz, CDCl<sub>3</sub>):** δ 7.27–7.33 (m, 5H), 3.13–3.39 (m, 6H), 1.74–1.79 (m, 4H).

**<sup>13</sup>C NMR (100 MHz, CDCl<sub>3</sub>):** δ 130.6 (d, *J* = 8.2 Hz), 129.5 (d, *J* = 6.5 Hz), 128.7 (d,

$J = 2$  Hz), 127.1 (d,  $J = 1$  Hz), 46.4 (d,  $J = 4$  Hz), 33.1 (dd,  $J = 128.6$  Hz, 31.1 Hz), 26.1 (d,  $J = 8.1$  Hz).

$^{31}\text{P}$  NMR (162 MHz,  $\text{CDCl}_3$ ):  $\delta$  31.3 (d,  $J = 1044$  Hz, 1P).

$^{19}\text{F}$  NMR (376 MHz,  $\text{CDCl}_3$ ):  $\delta$  -64.4 (d,  $J = 1045$  Hz, 1F).

HRMS ( $m/z$ ) calculated for  $\text{C}_{12}\text{H}_9\text{FO}_2\text{P}^+$   $[\text{M}+\text{H}]^+$ : 228.0948; found: 228.0941.

### *N,N*-Dimethyl-*P*-((perfluorophenyl)methyl)phosphonamidic fluoride (36)

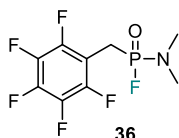

Light yellow oil, yield: 43%.

$^1\text{H}$  NMR (400 MHz,  $\text{CDCl}_3$ ):  $\delta$  3.25–3.41 (m, 2H), 2.64 (d,  $J = 10.0$  Hz, 6H).

$^{13}\text{C}$  NMR (100 MHz,  $\text{CDCl}_3$ ):  $\delta$  179.9, 144.9 (d,  $J = 250$  Hz), 140.0 (d,  $J = 278$  Hz), 62.5 (d,  $J = 6.5$  Hz), 20.9 (d,  $J = 142$  Hz), 16.2 (d,  $J = 6$  Hz).

$^{31}\text{P}$  NMR (162 MHz,  $\text{CDCl}_3$ ):  $\delta$  28.1 (d,  $J = 1054$  Hz, 1P).

$^{19}\text{F}$  NMR (376 MHz,  $\text{CDCl}_3$ ):  $\delta$  -65.3 (d,  $J = 1053$  Hz, 2F), -141.5 (2F), -154.4 (1F), -161.2 (2F).

HRMS ( $m/z$ ) calculated for  $\text{C}_9\text{H}_9\text{F}_6\text{NOP}^+$   $[\text{M}+\text{H}]^+$ : 292.0320; found: 292.0324.

### Perfluorophenyl 4-(((dimethylamino)fluorophosphoryl)methyl)benzoate (37)

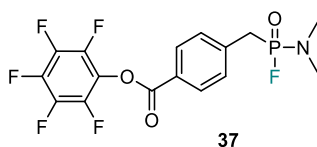

White solid, yield: 66%.

$^1\text{H}$  NMR (400 MHz,  $\text{CDCl}_3$ ):  $\delta$  2.70 (dd,  $J = 10.0$  Hz, 2.0 Hz, 6H), 3.33–3.49 (m, 2H), 7.48 (d,  $J = 8.0$  Hz, 2H), 8.17 (d,  $J = 8.0$  Hz, 2H).

$^{13}\text{C}$  NMR (100 MHz,  $\text{CDCl}_3$ ):  $\delta$  162.2, 142.6 (d,  $J = 8.5$  Hz), 140.1 (m), 139.2 (m), 137.9 (m), 136.7 (m), 131.2 (d,  $J = 2.5$  Hz), 130.1 (d,  $J = 6.5$  Hz), 126.1 (d,  $J = 3.4$  Hz), 35.8 (d,  $J = 4.2$  Hz), 32.8 (dd,  $J = 32.7$  Hz, 129.3 Hz).

$^{31}\text{P}$  NMR (162 MHz,  $\text{CDCl}_3$ ):  $\delta$  32.0 ( $J = 1052$  Hz, 1P).

$^{19}\text{F}$  NMR (376 MHz,  $\text{CDCl}_3$ ):  $\delta$  -65.8 (d,  $J = 1052$  Hz, 1F), -152.4 (d,  $J = 17.7$  Hz, 2F), -157.8 (t,  $J = 21.1$  Hz, 1F), -162.2 (t,  $J = 21.8$  Hz, 2F).

HRMS ( $m/z$ ) calculated for  $\text{C}_{16}\text{H}_{13}\text{F}_6\text{NO}_3\text{P}^+$   $[\text{M}+\text{H}]^+$ : 412.0532; found: 412.0537.

**2,5-Dioxopyrrolidin-1-yl 4-(((dimethylamino)fluorophosphoryl)methyl)benzoate (38)**

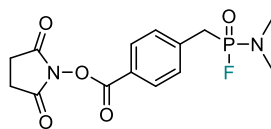

38

White solid, yield: 45%.

**<sup>1</sup>H NMR (400 MHz, CDCl<sub>3</sub>):** δ 2.65 (dd, *J* = 9.6 Hz, 1.6 Hz, 6H), 2.90 (s, 4H), 3.30–3.46 (m, 2H), 7.46 (d, *J* = 6.4 Hz, 2H), 8.10 (d, *J* = 8.0 Hz, 2H).

**<sup>13</sup>C NMR (100 MHz, CDCl<sub>3</sub>):** δ 169.2, 161.5, 138.5 (d, *J* = 6.2 Hz), 131.0 (d, *J* = 2.8 Hz), 130.1 (d, *J* = 6.6 Hz), 124.2 (d, *J* = 3.4 Hz), 35.9 (d, *J* = 4.1 Hz), 33.0 (dd, *J* = 129.1 Hz, 33.7 Hz), 25.6.

**<sup>31</sup>P NMR (162 MHz, CDCl<sub>3</sub>):** δ 31.9 (d, *J* = 1052 Hz, 1P).

**<sup>19</sup>F NMR (376 MHz, CDCl<sub>3</sub>):** δ -65.7 (d, *J* = 1051 Hz, 1F).

**HRMS (m/z)** calculated for C<sub>14</sub>H<sub>17</sub>FN<sub>2</sub>O<sub>5</sub>P<sup>+</sup> ([M+H]<sup>+</sup>): 343.0854; found: 343.0856.

***N*-Allyl-*P*-benzyl-*N*-(prop-2-yn-1-yl)phosphonamidic fluoride (39)**

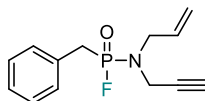

39

White solid, yield: 63%.

**<sup>1</sup>H NMR (400 MHz, CDCl<sub>3</sub>):** δ 7.26–7.33 (m, 5H), 5.52–5.59 (m, 1H), 5.19–5.25 (m, 2H), 3.68–3.91 (m, 2H), 3.61–3.64 (m, 2H), 3.27–3.42 (m, 2H), 2.23 (s, 1H).

**<sup>13</sup>C NMR (100 MHz, CDCl<sub>3</sub>):** δ 133.5 (d, *J* = 2 Hz), 129.9 (d, *J* = 8.6 Hz), 129.8 (d, *J* = 6.7 Hz), 128.8 (d, *J* = 2 Hz), 127.4 (d, *J* = 3.2 Hz), 119.4, 78.6, 72.6, 47.6 (d, *J* = 3.2 Hz), 34.0 (d, *J* = 5.4 Hz), 33.7 (d, *J* = 128.5 Hz).

**<sup>31</sup>P NMR (162 MHz, CDCl<sub>3</sub>):** δ 33.1 (d, *J* = 1058 Hz, 1P).

**<sup>19</sup>F NMR (376 MHz, CDCl<sub>3</sub>):** δ -65.4 (d, *J* = 1057 Hz, 1F).

**HRMS (m/z)** calculated for C<sub>13</sub>H<sub>16</sub>FNOP<sup>+</sup> ([M+H]<sup>+</sup>): 252.0948; found: 252.0940.

***P*-(4-(benzo[*d*]thiazol-2-yl)benzyl)-*N,N*-dimethylphosphonamidic fluoride (40)**

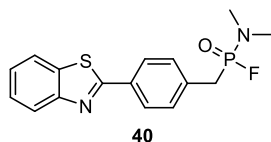

White solid, yield: 47%.

**<sup>1</sup>H NMR (400 MHz, CDCl<sub>3</sub>):** δ 8.07 (d, *J* = 8.0 Hz, 3H), 7.91 (d, *J* = 7.7 Hz, 1H), 7.48–7.52 (m, 1H), 7.38–7.45 (m, 3H), 3.29–3.45 (m, 2H), 2.68 (dd, *J* = 9.7, 2.2 Hz, 6H).

**<sup>13</sup>C NMR (100 MHz, CDCl<sub>3</sub>):** δ 154.1, 135.0, 132.8, 130.2 (d, *J* = 6.8 Hz), 127.9 (d, *J* = 3.0 Hz), 127.8, 127.5, 126.4, 125.3, 123.2, 121.6, 35.9 (d, *J* = 4.2 Hz, 4H), 30.8 (dd, *J* = 43.9 Hz, 125.4 Hz).

**<sup>31</sup>P NMR (162 MHz, CDCl<sub>3</sub>):** δ 32.9 (d, *J* = 1052 Hz, 1P).

**<sup>19</sup>F NMR (376 MHz, CDCl<sub>3</sub>):** δ -66.4 (d, *J* = 1051 Hz, 1F).

**HRMS (m/z)** calculated for C<sub>16</sub>H<sub>17</sub>FN<sub>2</sub>OPS<sup>+</sup> ([M+H]<sup>+</sup>): 335.0778; found: 335.0772.

#### Benzyl(3*H*-spiro[isobenzofuran-1,4'-piperidin]-1'-yl)phosphinic fluoride (41)

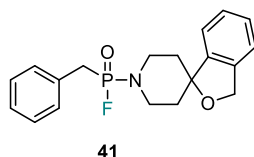

White solid, yield: 63%.

**<sup>1</sup>H NMR (400 MHz, CDCl<sub>3</sub>):** δ 7.23–7.32 (m, 5H), 7.18–7.19 (m, 2H), 7.10–7.12 (m, 1H), 6.88–6.90 (m, 1H), 4.95 (s, 2H), 3.35–3.45 (m, 2H), 3.17–3.54 (m, 2H), 3.03–3.12 (m, 2H), 1.51–1.61 (m, 4H).

**<sup>13</sup>C NMR (100 MHz, CDCl<sub>3</sub>):** δ 144.9, 138.6, 130.7 (d, *J* = 2.4 Hz), 130.6 (d, *J* = 2.3 Hz), 129.6 (d, *J* = 6.8 Hz), 128.9, 127.8, 127.4, 127.3, 120.9 (d, *J* = 54.5 Hz), 84.3, 70.9, 40.8 (d, *J* = 3.1 Hz), 36.4, 32.9 (dd, *J* = 131.0 Hz, 32.6 Hz).

**<sup>31</sup>P NMR (162 MHz, CDCl<sub>3</sub>):** δ 32.1 (d, *J* = 1052 Hz, 1P).

**<sup>19</sup>F NMR (376 MHz, CDCl<sub>3</sub>):** δ -64.6 (dd, *J* = 5.64 Hz, 1051 Hz, 1F).

**HRMS (m/z)** calculated for C<sub>19</sub>H<sub>22</sub>FNO<sub>2</sub>P<sup>+</sup> ([M+H]<sup>+</sup>): 346.1367; found: 346.1368.

#### *P*-benzyl-*N,N*-bis(2-chloroethyl)phosphonamidic fluoride (42)

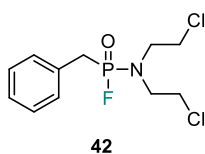

White solid, yield: 71%.

$^1\text{H NMR}$  (400 MHz,  $\text{CDCl}_3$ ):  $\delta$  7.34–7.38 (m, 5H), 3.35–3.47 (m, 8H), 3.23–3.31 (m, 2H).

$^{13}\text{C NMR}$  (100 MHz,  $\text{CDCl}_3$ ):  $\delta$  129.7, 129.6, 129.1, 127.7 (d,  $J = 15.4$  Hz), 48.0 (d,  $J = 3.9$  Hz), 41.6, 33.0 (dd,  $J = 128.7$  Hz, 30.1 Hz).

$^{31}\text{P NMR}$  (162 MHz,  $\text{CDCl}_3$ ):  $\delta$  34.0 (d,  $J = 1062$  Hz, 1P).

$^{19}\text{F NMR}$  (376 MHz,  $\text{CDCl}_3$ ):  $\delta$  -62.9 (d,  $J = 1061$  Hz, 1F).

HRMS ( $m/z$ ) calculated for  $\text{C}_{11}\text{H}_{16}\text{Cl}_2\text{FNOP}^+$  ( $[\text{M}+\text{H}]^+$ ): 298.0325; found: 298.0331.

**Benzyl(4-((5,6-dimethoxy-1-oxo-2,3-dihydro-1*H*-inden-2-yl)methyl)piperidin-1-yl)phosphinic fluoride (43)**

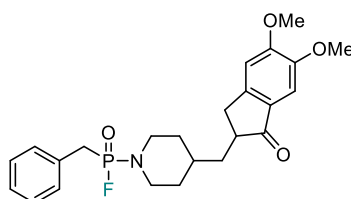

43

White solid, yield: 76%.

$^1\text{H NMR}$  (400 MHz,  $\text{CDCl}_3$ ):  $\delta$  7.38–7.46 (m, 5H), 7.36 (s, 1H), 6.95 (s, 1H), 4.06 (s, 3H), 4.00 (s, 3H), 3.58–3.66 (m, 2H), 3.42–3.48 (m, 1H), 3.29–3.83 (m, 2H), 2.74–2.77 (m, 3H), 1.88–1.93 (m, 3H), 1.70–1.75 (m, 3H), 1.11–1.22 (m, 2H).

$^{13}\text{C NMR}$  (100 MHz,  $\text{CDCl}_3$ ):  $\delta$  206.9, 155.3, 149.2, 148.3, 130.3 (d,  $J = 8.3$  Hz), 129.3, 128.8, 128.4, 126.9, 107.1 (d,  $J = 6.1$  Hz), 104.1 (d,  $J = 10.5$  Hz), 55.8 (d,  $J = 15.9$  Hz), 44.5, 43.8 (d,  $J = 6.7$  Hz), 38.4, 33.8, 33.3, 32.4 (dd,  $J = 131.7$  Hz, 38.5 Hz).

$^{31}\text{P NMR}$  (162 MHz,  $\text{CDCl}_3$ ):  $\delta$  31.9 (d,  $J = 1052$  Hz, 1P).

$^{19}\text{F NMR}$  (376 MHz,  $\text{CDCl}_3$ ):  $\delta$  -65.1 (dd,  $J = 1052$  Hz, 25.5 Hz, 1F).

HRMS ( $m/z$ ) calculated for  $\text{C}_{24}\text{H}_{30}\text{FNO}_4\text{P}^+$  ( $[\text{M}+\text{H}]^+$ ): 446.1891; found: 446.1897.

**Benzyl(4-(2-((2,4-dimethylphenyl)thio)phenyl)piperazin-1-yl)phosphinic fluoride (44)**

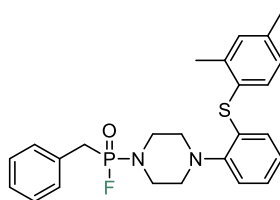

44

White solid, yield: 56%.

**<sup>1</sup>H NMR (400 MHz, CDCl<sub>3</sub>):** δ 7.30–7.39 (m, 6H), 7.15 (s, 1H), 7.02–7.08 (m, 2H), 6.95 (d, *J* = 8.0 Hz, 1H), 6.88 (t, *J* = 7.6 Hz, 1H), 3.24–3.43 (m, 6H), 2.92 (s, 4H), 2.33 (d, *J* = 25.6 Hz, 6H).

**<sup>13</sup>C NMR (100 MHz, CDCl<sub>3</sub>):** δ 148.7, 142.3, 139.3, 136.1, 134.7, 131.7, 130.4 (d, *J* = 8.7 Hz), 129.7 (d, *J* = 6.8 Hz), 128.9 (d, *J* = 2.5 Hz), 127.8, 127.6, 127.4 (d, *J* = 3.2 Hz), 126.3, 125.5, 124.8, 120.0, 51.9 (d, *J* = 3.8 Hz), 44.3, 33.0 (dd, *J* = 130.4 Hz, 32 Hz), 21.2, 20.5.

**<sup>31</sup>P NMR (162 MHz, CDCl<sub>3</sub>):** δ 31.6 (d, *J* = 1055 Hz, 1P).

**<sup>19</sup>F NMR (376 MHz, CDCl<sub>3</sub>):** δ -64.6 (d, *J* = 1054 Hz, 1F).

**HRMS (m/z)** calculated for C<sub>25</sub>H<sub>29</sub>FN<sub>2</sub>OPS<sup>+</sup> ([M+H]<sup>+</sup>): 455.1717; found: 455.1713.

***P*-(4-(((1-(*tert*-butyl)-5-chloro-6-oxo-1,6-dihydropyridazin-4-yl)oxy)methyl)benzyl)-*N,N*-dimethylphosphonamidic fluoride (45)**

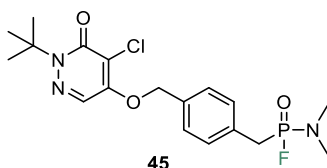

White solid, yield: 51%.

**<sup>1</sup>H NMR (400 MHz, CDCl<sub>3</sub>):** δ 7.71 (d, *J* = 4.5 Hz, 1H), 7.36 (dd, *J* = 3.3 Hz, 13.1 Hz, 4H), 5.30 (d, *J* = 2.4 Hz, 2H), 3.23–3.36 (m, 2H), 2.64–2.68 (m, 6H), 1.63 (d, *J* = 4.5 Hz, 9H).

**<sup>13</sup>C NMR (100 MHz, CDCl<sub>3</sub>):** δ 158.9, 153.6, 133.9 (d, *J* = 3.6 Hz), 131.3 (d, *J* = 8.8 Hz), 130.1 (d, *J* = 6.6 Hz), 127.6 (d, *J* = 2.8 Hz), 125.0, 118.3, 71.4, 66.4, 35.8 (d, *J* = 4.1 Hz), 32.2 (dd, *J* = 32.5 Hz, 130.5 Hz), 27.8 (s, 21H).

**<sup>31</sup>P NMR (162 MHz, CDCl<sub>3</sub>):** δ 33.5 (d, *J* = 1051 Hz, 1P).

**<sup>19</sup>F NMR (376 MHz, CDCl<sub>3</sub>):** δ -66.7 (d, *J* = 1051 Hz, 1F).

**HRMS (m/z)** calculated for C<sub>18</sub>H<sub>25</sub>ClFN<sub>3</sub>O<sub>3</sub>P<sup>+</sup> ([M+H]<sup>+</sup>): 416.1301; found: 416.1306.



**(3*S*,8*R*,9*S*,10*S*,13*R*,14*S*,17*R*)-10,13-Dimethyl-17-((*R*)-6-methylheptan-2-yl)hexadecahydro-1*H*-cyclopenta[*a*]phenanthren-3-yl 1-(benzylfluorophosphoryl)-piperidine-4-carboxylate (46)**

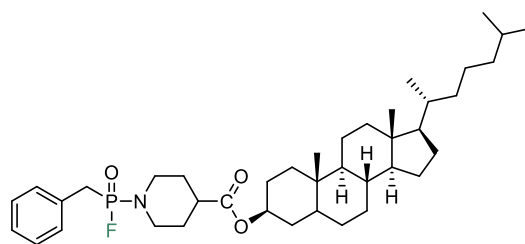

46

White solid, yield: 50%.

**<sup>1</sup>H NMR (400 MHz, CDCl<sub>3</sub>):** δ 7.30–7.35 (m, 5H), 3.38–3.43 (m, 1H), 3.19–3.31 (m, 1H), 2.72–2.77 (m, 1H), 2.32–2.37 (m, 1H), 1.96 (d, *J* = 12 Hz, 1H), 1.71–1.81 (m, 4H), 1.64–1.67 (m, 2H), 1.43–1.58 (m, 8H), 1.22–1.38 (m, 14H), 1.04–1.15 (m, 6H), 0.94–0.99 (m, 3H), 0.85–0.90 (m, 10H), 0.81 (s, 3H), 0.64 (s, 3H).

**<sup>13</sup>C NMR (100 MHz, CDCl<sub>3</sub>):** δ 173.6, 130.4 (d, *J* = 10.7 Hz), 129.6 (d, *J* = 6.8 Hz), 128.8 (d, *J* = 2.7 Hz), 127.4 (d, *J* = 3.4 Hz), 73.9, 56.3 (d, *J* = 13.5 Hz), 54.2, 44.6, 43.3, 42.6, 40.9, 39.9, 39.5, 36.7, 36.2, 35.8, 35.5, 34.0, 33.8, 33.5, 32.6, 32.2, 30.0, 29.7, 31.9, 28.6, 28.2 (d, *J* = 6.6 Hz), 28.0, 27.4, 24.2, 23.8, 22.7 (d, *J* = 25.3 Hz), 21.2, 18.7, 12.1 (d, *J* = 16.3 Hz).

**<sup>31</sup>P NMR (162 MHz, CDCl<sub>3</sub>):** δ 31.7 (d, *J* = 1055 Hz, 1P).

**<sup>19</sup>F NMR (376 MHz, CDCl<sub>3</sub>):** δ -65.4 (d, *J* = 1054 Hz, 1F).

**HRMS (m/z)** calculated for C<sub>40</sub>H<sub>64</sub>FNO<sub>3</sub>P<sup>+</sup> ([M+H]<sup>+</sup>): 656.4602; found: 656.4606.

## 2.3 Experimental Procedures for Radiochemistry

### 2.3.1 General procedure for the preparation of [<sup>18</sup>F]TBAF, [<sup>18</sup>F]CsF, [<sup>18</sup>F]KF/K<sub>222</sub>, [<sup>18</sup>F]KF/18-cr-6

[<sup>18</sup>F]F<sup>-</sup> was produced through the <sup>18</sup>O(p, n)<sup>18</sup>F reaction using the IBA 18/9 cyclotron (Belgium) and was delivered in [<sup>18</sup>O]H<sub>2</sub>O. The [<sup>18</sup>F] fluoride ([<sup>18</sup>F]F<sup>-</sup>) was extracted from the [<sup>18</sup>O]-enriched water using QMA and then introduced into a glass vial reactor with a pre-configured eluent (**Table S2**). The resulting solution was co-evaporated and dried at 110 °C, and this process was repeated three times using clean glass vials (300 μL acetonitrile × 3) for subsequent utilization.

**Table S2:** Detailed formulas of eluent

| Entry | [ <sup>18</sup> F]fluoride            | Eluent                                                                                                                    |
|-------|---------------------------------------|---------------------------------------------------------------------------------------------------------------------------|
| 1     | [ <sup>18</sup> F]TBAF                | 6.0 mg <i>n</i> Bu <sub>4</sub> N <sup>+</sup> OH <sup>-</sup> in 100 μL CH <sub>3</sub> CN                               |
| 2     | [ <sup>18</sup> F]CsF                 | 7.5 mg Cs <sub>2</sub> CO <sub>3</sub> in 100 μL CH <sub>3</sub> CN                                                       |
| 3     | [ <sup>18</sup> F]KF/K <sub>222</sub> | 8.0 mg K <sub>222</sub> , 1.0 mg K <sub>2</sub> CO <sub>3</sub> in CH <sub>3</sub> CN/H <sub>2</sub> O (4/1, v/v, 0.5 mL) |
| 4     | [ <sup>18</sup> F]KF/18-cr-6          | 6.0 mg 18-crown-6, 1.0 mg K <sub>2</sub> CO <sub>3</sub> in CH <sub>3</sub> CN/H <sub>2</sub> O (4/1, v/v, 0.5 mL)        |

### 2.3.2 Optimization studies for alkyl phosphonates <sup>18</sup>F-fluorination

The reaction conditions for <sup>18</sup>F-fluorination were reevaluated in comparison to fluorination. Initially, the conditions were kept consistent with those used for non-radioactive in order to screen suitable [<sup>18</sup>F]fluoride. The precursor **S2** underwent conversion into a pyridinium salt intermediate within a 10 min period. Subsequently, the intermediate was introduced into a glass vial reactor, where a previously prepared dry 37–55.5 MBq [<sup>18</sup>F]fluoride was present, and the mixture was incubated at RT with continuous shaking for 5–10 min. After the completion of the reaction, 9900 μL of water was added to quench the reaction and radiochemical conversion (RCC) was assessed using radio-TLC by dividing the area under the curve (AUC) of the radioactive peak of interest by the total AUC of all radioactive peaks. The radiochemical yield (RCY) is based on the ratio of the final isolated product to that of the initial radioactivity, with all amounts decay corrected to the same time<sup>11</sup>. In all <sup>18</sup>F-labeling reaction systems, due to the presence of acidic and water-soluble impurities in the reaction mixture, a simple purification step using a C18 cartridge is typically performed prior to HPLC analysis to remove these impurities.

**Table S3:** Optimization for alkyl phosphonates <sup>18</sup>F-fluorination

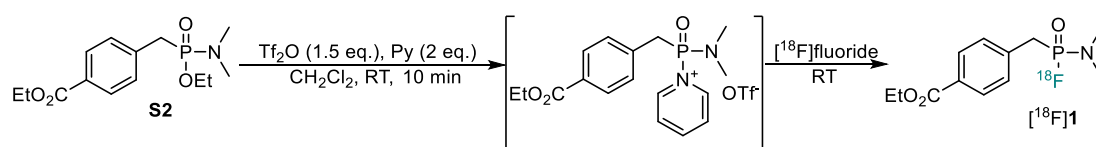

| Entry | Precursor load<br>/μmol | [ <sup>18</sup> F]fluoride            | Reaction time<br>/min | RCC <sub>TLC</sub><br>(%) <sup>[a]</sup> |
|-------|-------------------------|---------------------------------------|-----------------------|------------------------------------------|
| 1     | 20                      | [ <sup>18</sup> F]TBAF                | 5                     | 10 ± 5                                   |
| 2     | 20                      | [ <sup>18</sup> F]CsF                 | 5                     | 37 ± 1                                   |
| 3     | 20                      | [ <sup>18</sup> F]KF/K <sub>222</sub> | 5                     | 58 ± 5                                   |
| 4     | 20                      | [ <sup>18</sup> F]KF/18-cr-6          | 5                     | 5 ± 1                                    |
| 5     | 20                      | [ <sup>18</sup> F]KF/K <sub>222</sub> | 10                    | 78 ± 5                                   |
| 6     | 2                       | [ <sup>18</sup> F]KF/K <sub>222</sub> | 10                    | 67 ± 5                                   |
| 7     | 1                       | [ <sup>18</sup> F]KF/K <sub>222</sub> | 10                    | 62 ± 3                                   |
| 8     | 0.2                     | [ <sup>18</sup> F]KF/K <sub>222</sub> | 10                    | 16 ± 6                                   |
| 9     | 0.02                    | [ <sup>18</sup> F]KF/K <sub>222</sub> | 10                    | 5 ± 2                                    |

[a] RCC<sub>TLC</sub>s determined by radio-TLC.

### 2.3.3 RadioTLC and radio-HPLC analysis of $^{18}\text{F}$ -labeled compounds

All  $^{18}\text{F}$ -labeling reactions were performed following the specified protocol: 3  $\mu\text{mol}$  of precursor were dissolved in 300  $\mu\text{L}$   $\text{CH}_2\text{Cl}_2$ . Then, 2 eq. of  $\text{Tf}_2\text{O}$  were added for 5 min, followed by the addition of 1.5 eq. of pyridine for another 5 min. The resulting intermediate solution was subsequently divided into three equal portions and introduced into separate glass vial reactors, each containing pre-prepared 37–55.5 MBq dried  $^{18}\text{F}[\text{Kf}/\text{K}_{222}]$ . The reactors were continuously oscillated at room temperature for 10 minutes. Upon completion of the reaction, 9900  $\mu\text{L}$  of water was added to quench the reaction. The RCCs of the reaction were determined using radio-TLC with methanol as the developing agent ( $n = 3$ ). Additionally, the RCY and co-injection were measured using a radio-HPLC.

**S15**, as a precursor, undergoes highly selective  $^{18}\text{F}$ -fluorination to yield an unstable phenyl benzylphosphonofluoridate, which, as reported in the literature<sup>12</sup>, is prone to hydrolysis and cannot be isolated due to its instability, spontaneously converting into benzylphosphonofluoridic acid. The results demonstrated a high selectivity for the alkyl phosphonate esters, aligning with our expectations.

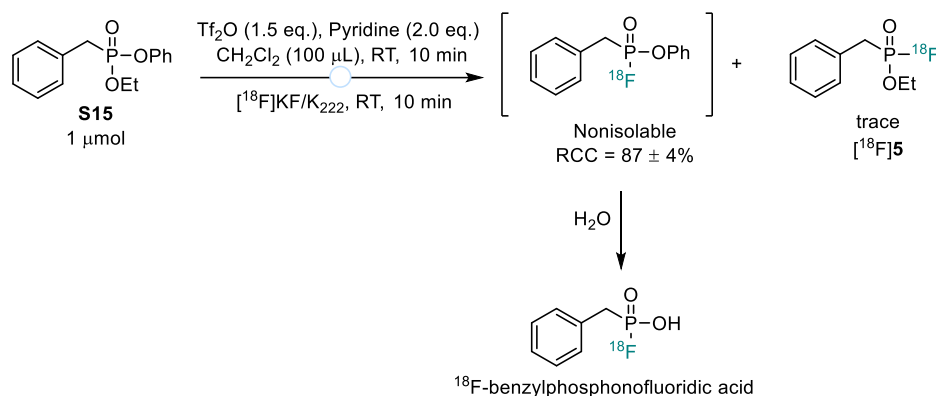

**Fig. S4:** The selectivity of the reaction was verified by  $^{18}\text{F}$ -fluorination.

**Table S4:** Average radiochemical conversion for  $^{18}\text{F}$ -benzylphosphonofluoridic acid

| Run                    | 1  | 2  | 3  | Average    |
|------------------------|----|----|----|------------|
| RCC <sub>TLC</sub> (%) | 77 | 76 | 80 | $78 \pm 2$ |

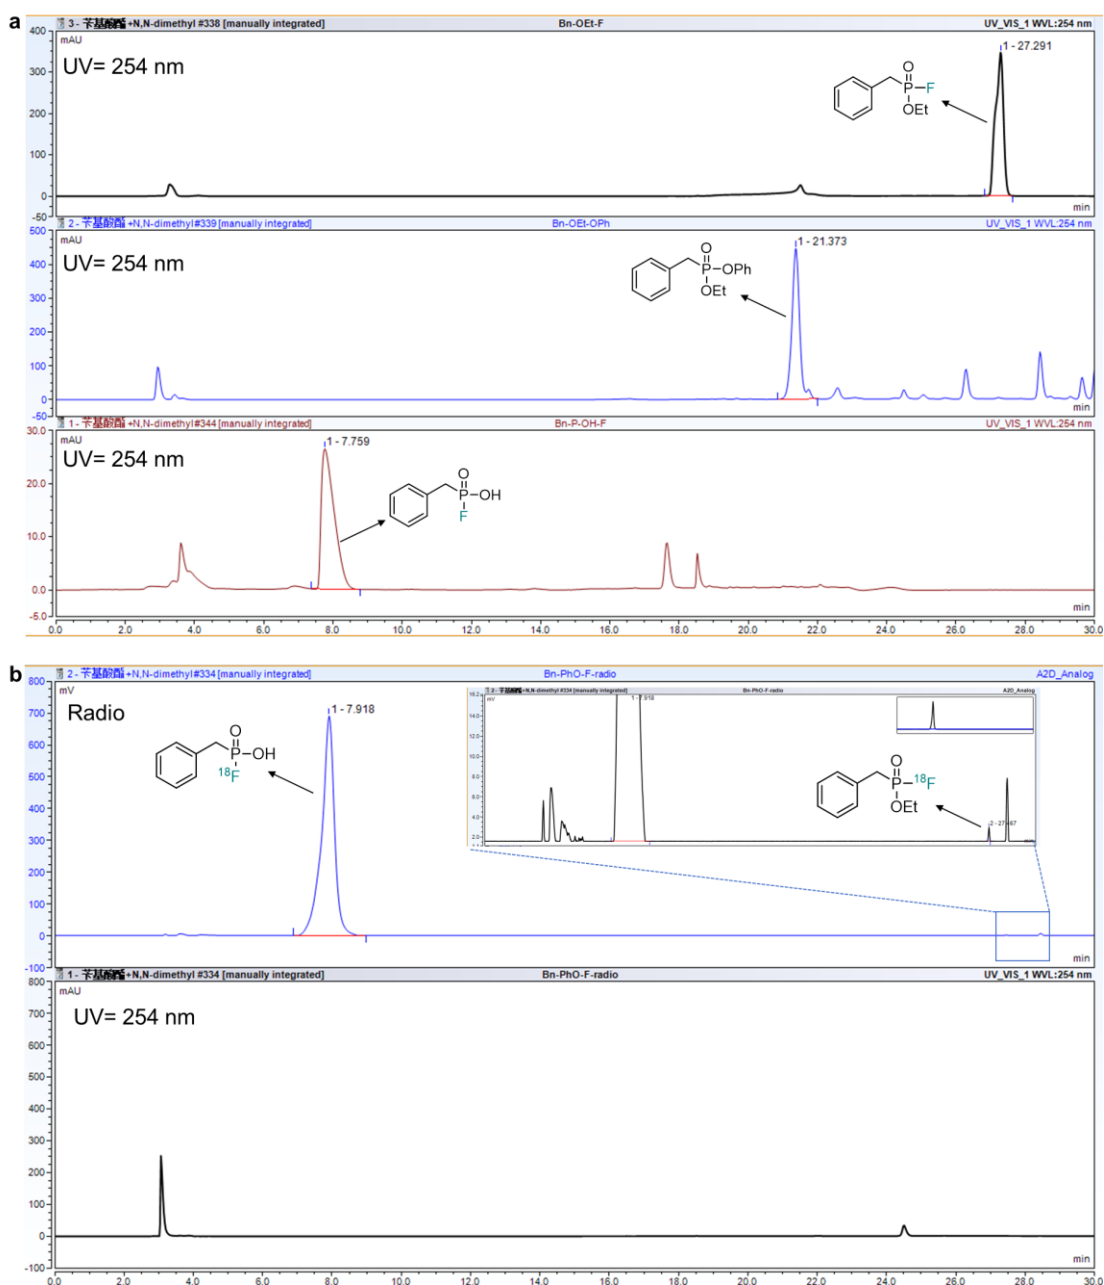

**Fig. S5:** **a.** HPLC traces of precursor and reference compounds; **b.** HPLC traces of crude  $^{18}\text{F}$ -labeled products. 1# HPLC conditions; NanoChrom C18 column ( $5\ \mu\text{m}$ ,  $4.6 \times 250\ \text{mm}$ ); isocratic elution, 0–10 min, 10% of  $\text{CH}_3\text{CN}$  and 90% of water containing 0.1%TFA, 10–30 min, from 10% of  $\text{CH}_3\text{CN}$  and 90% of water containing 0.1%TFA to 70% of  $\text{CH}_3\text{CN}$  and 30% of water containing 0.1%TFA; flow rate: 1.0 mL/min.

### Preparation of $^{18}\text{F}$ 1

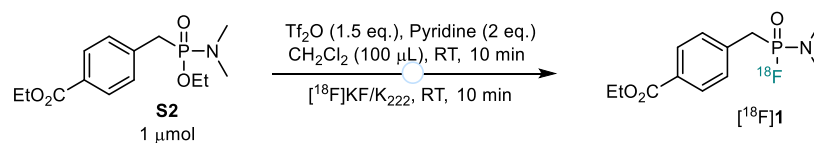

**Table S5:** Average radiochemical conversion for [ $^{18}\text{F}$ ]1

| Run                    | 1  | 2  | 3  | Average |
|------------------------|----|----|----|---------|
| RCC <sub>TLC</sub> (%) | 63 | 66 | 59 | 62 ± 3  |

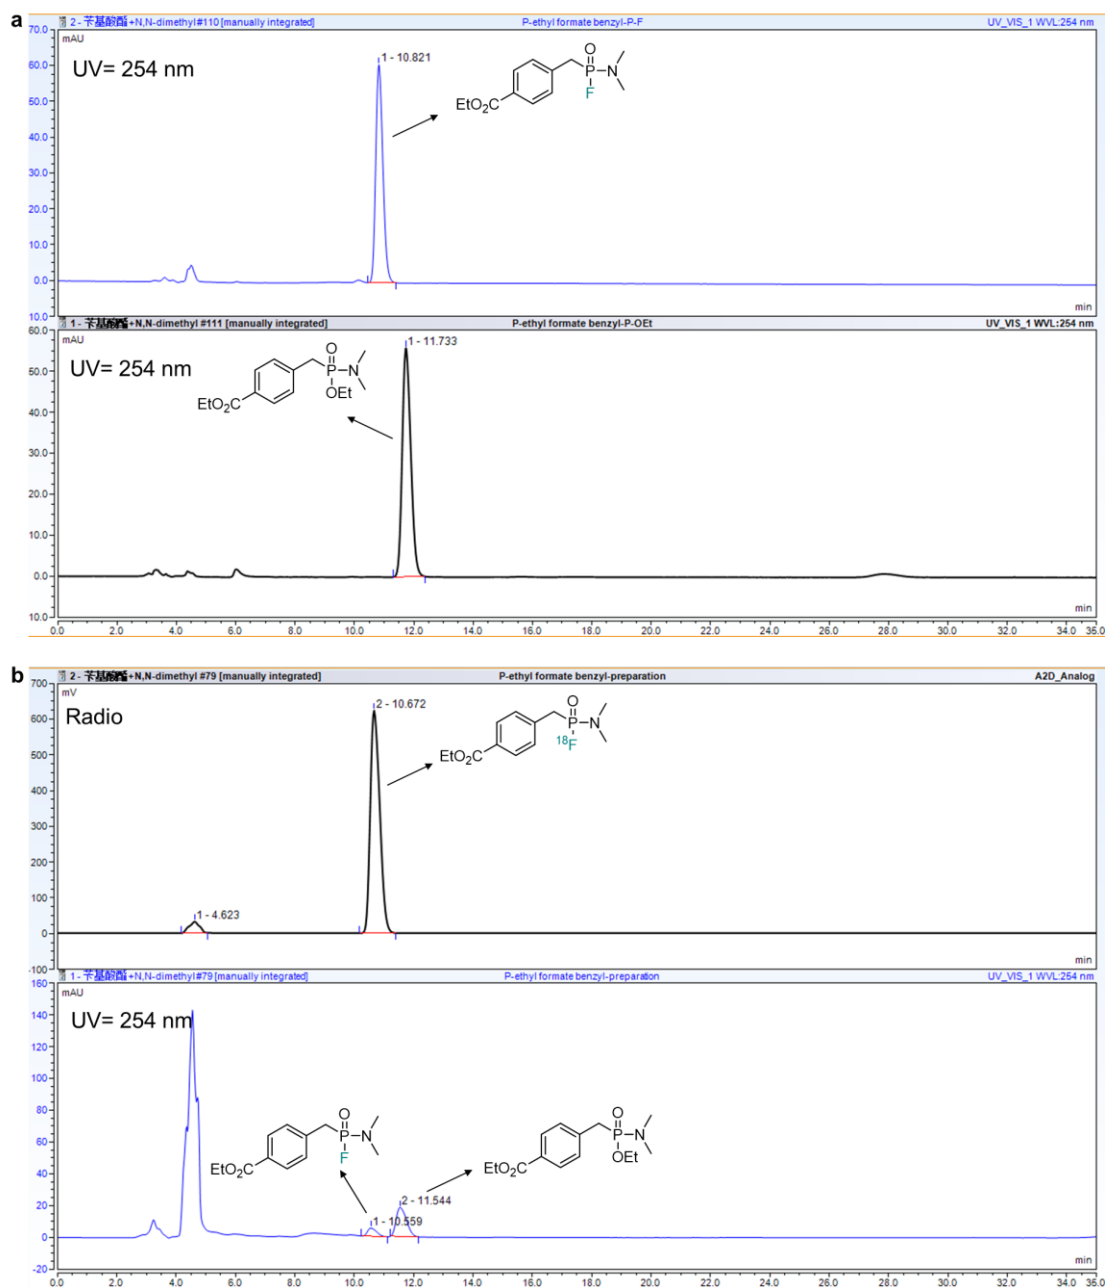

**Fig. S6:** **a.** HPLC traces of precursor and reference compounds; **b.** HPLC traces of crude  $^{18}\text{F}$ -labeled products. 1# HPLC conditions; SEP Basic-C18 semi-preparative column (120A  $5\mu\text{m}$   $10 \times 250$  mm); isocratic elution, 0–10 min, from 50% of  $\text{CH}_3\text{CN}$  and 50% of water containing 0.1%TFA to 40% of  $\text{CH}_3\text{CN}$  and 60% of water containing 0.1%TFA; 10–25 min, from 40% of  $\text{CH}_3\text{CN}$  and 60% of water containing 0.1%TFA to 35% of  $\text{CH}_3\text{CN}$  and 65%

of water containing 0.1%TFA; 25–35 min, 35% of CH<sub>3</sub>CN and 65% of water containing 0.1%TFA; flow rate: 3.0 mL/min.

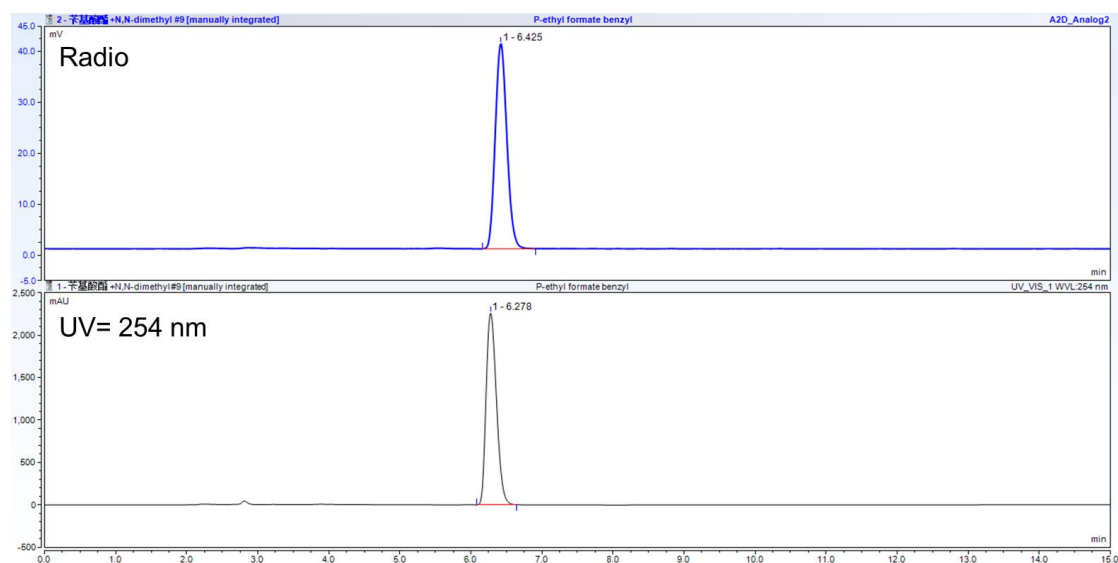

**Fig. S7:** Co-injection for [<sup>18</sup>F]**1**. 1# HPLC conditions; NanoChrom C18 column (5 μm, 4.6 × 250 mm); isocratic elution, H<sub>2</sub>O/CH<sub>3</sub>CN = 50/50, and the flow rate was 1.0 mL/min for 15 min. The RCP was > 99%. (The HPLC trace of the co-injection represents the results of the purified <sup>18</sup>F-product mixed with the corresponding reference compound, allowing confirmation of radiochemical purity (RCP) from the co-injection HPLC trace.)

### Preparation of [<sup>18</sup>F]**36**

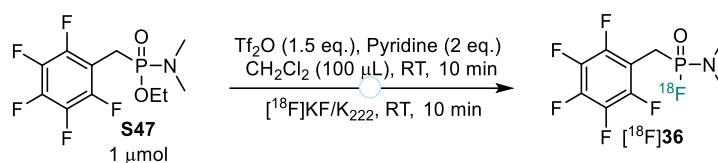

**Table S6:** Average radiochemical conversion for [<sup>18</sup>F]**36**

| Run                    | 1  | 2  | 3  | Average |
|------------------------|----|----|----|---------|
| RCC <sub>TLC</sub> (%) | 75 | 84 | 69 | 76 ± 7  |

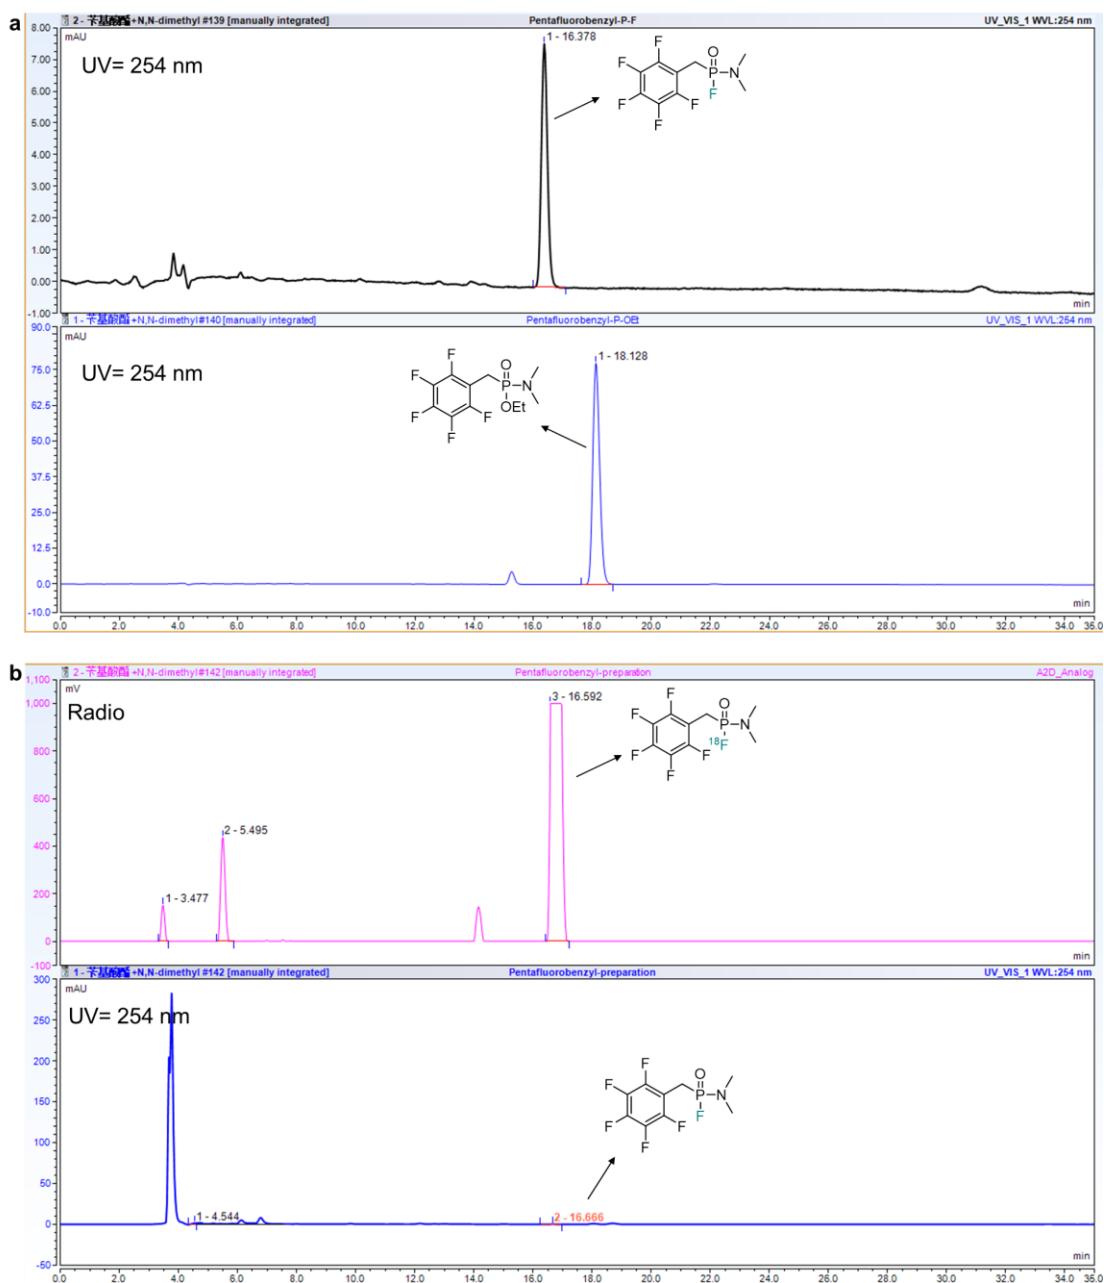

**Fig. S8:** **a.** HPLC traces of precursor and reference compounds; **b.** HPLC traces of crude <sup>18</sup>F-labeled products. 1# HPLC conditions; SEP Basic-C18 semi-preparative column (120A 5 $\mu$ m 10  $\times$  250mm); isocratic elution, 0–10 min, from 40% of CH<sub>3</sub>CN and 60% of water containing 0.1%TFA to 50% of CH<sub>3</sub>CN and 50% of water containing 0.1%TFA; 10–20 min, 50% of CH<sub>3</sub>CN and 50% of water containing 0.1%TFA; 20–35 min, from 50% of CH<sub>3</sub>CN and 50% of water containing 0.1%TFA to 55% of CH<sub>3</sub>CN and 45% of water containing 0.1%TFA; flow rate: 3.0 mL/min.



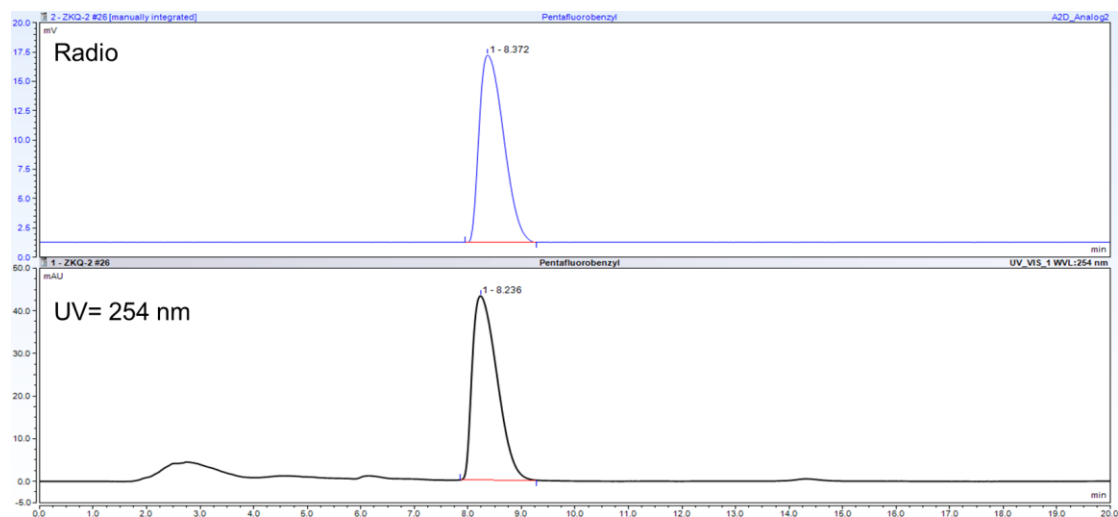

**Fig. S9:** Co-injection for [ $^{18}\text{F}$ ]36. 1# HPLC condition; NanoChrom C18 column (5  $\mu\text{m}$ , 4.6  $\times$  250 mm); isocratic elution,  $\text{H}_2\text{O}/\text{CH}_3\text{CN} = 50/50$ , and the flow rate was 1.0 mL/min for 20 min. The RCP was > 99%.

### Preparation of [ $^{18}\text{F}$ ]37

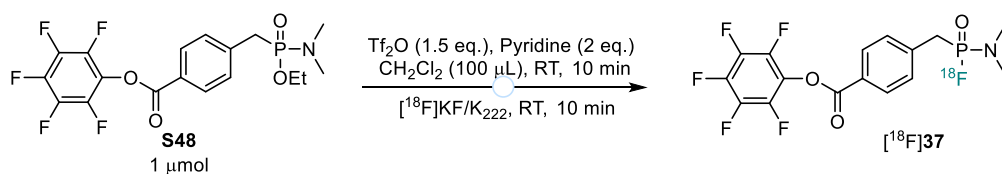

**Table S7:** Average radiochemical conversion for [ $^{18}\text{F}$ ]37

| Run                    | 1  | 2  | 3  | Average    |
|------------------------|----|----|----|------------|
| RCC <sub>TLC</sub> (%) | 70 | 67 | 77 | 71 $\pm$ 5 |

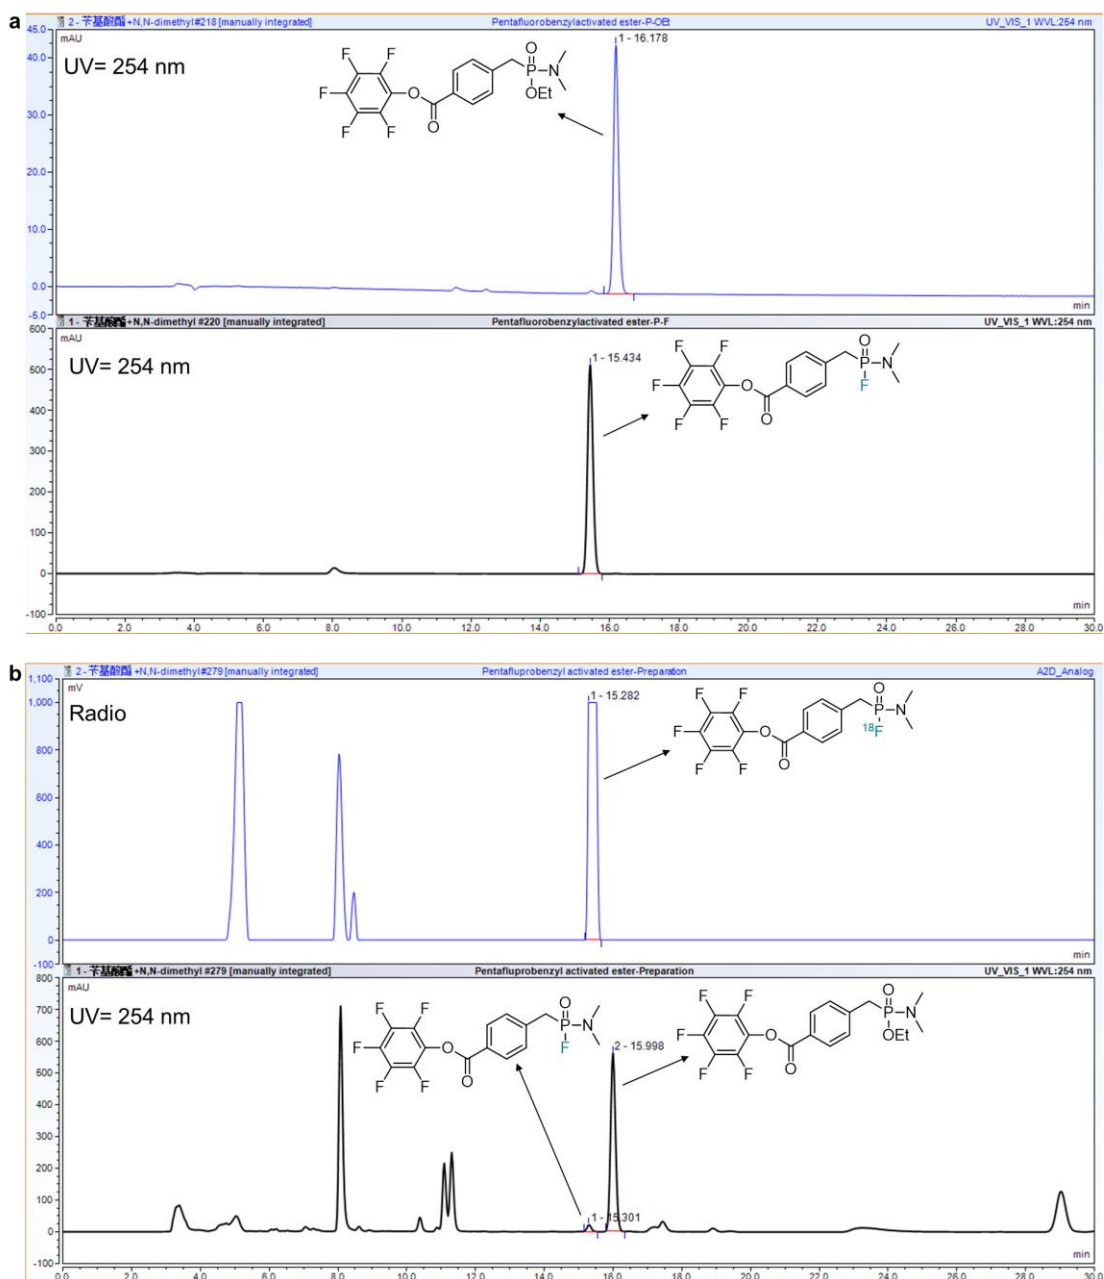

**Fig. S10:** **a.** HPLC traces of precursor and reference compounds; **b.** HPLC traces of crude  $^{18}\text{F}$ -labeled products. 1# HPLC conditions; SEP Basic-C18 semi-preparative column (120A  $5\mu\text{m}$   $10 \times 250\text{mm}$ ); isocratic elution, 0–10 min, from 50% of  $\text{CH}_3\text{CN}$  and 50% of water containing 0.1%TFA to 70% of  $\text{CH}_3\text{CN}$  and 30% of water containing 0.1%TFA; 10–30 min, from 70% of  $\text{CH}_3\text{CN}$  and 30% of water containing 0.1%TFA to 75% of  $\text{CH}_3\text{CN}$  and 25% of water containing 0.1%TFA; flow rate: 3.0 mL/min.

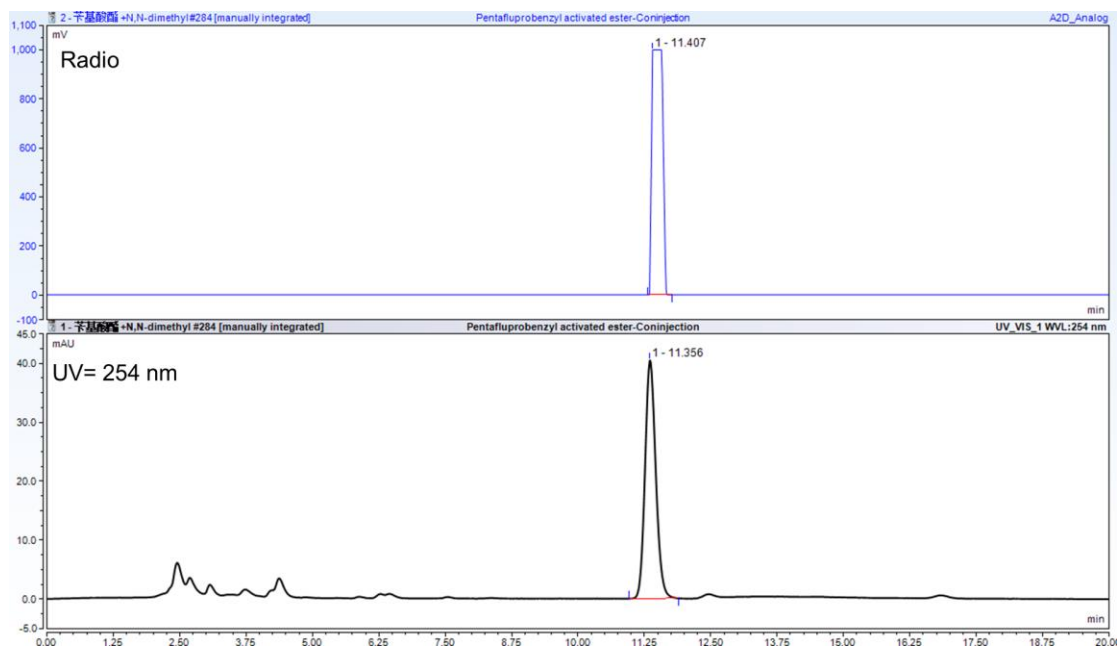

**Fig. S11:** Co-injection for  $[^{18}\text{F}]\mathbf{37}$ . 2# HPLC condition; NanoChrom C18 column (5  $\mu\text{m}$ ,  $4.6 \times 250$  mm), isocratic elution, water containing 0.1%TFA/ $\text{CH}_3\text{CN} = 40/60$ , and the flow rate was 1.0 mL/min for 20 min. The RCP was > 99%.

### Preparation of $[^{18}\text{F}]\mathbf{38}$

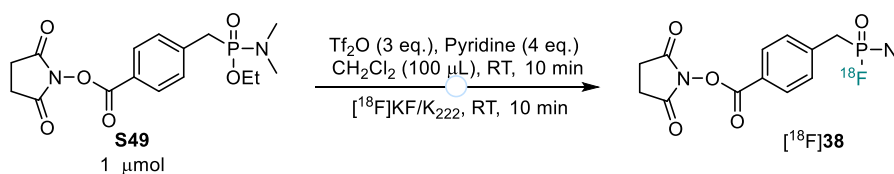

**Table S8:** Average radiochemical conversion for  $[^{18}\text{F}]\mathbf{38}$

| Run                    | 1  | 2  | 3  | Average |
|------------------------|----|----|----|---------|
| RCC <sub>TLC</sub> (%) | 90 | 88 | 85 | 88 ± 3  |

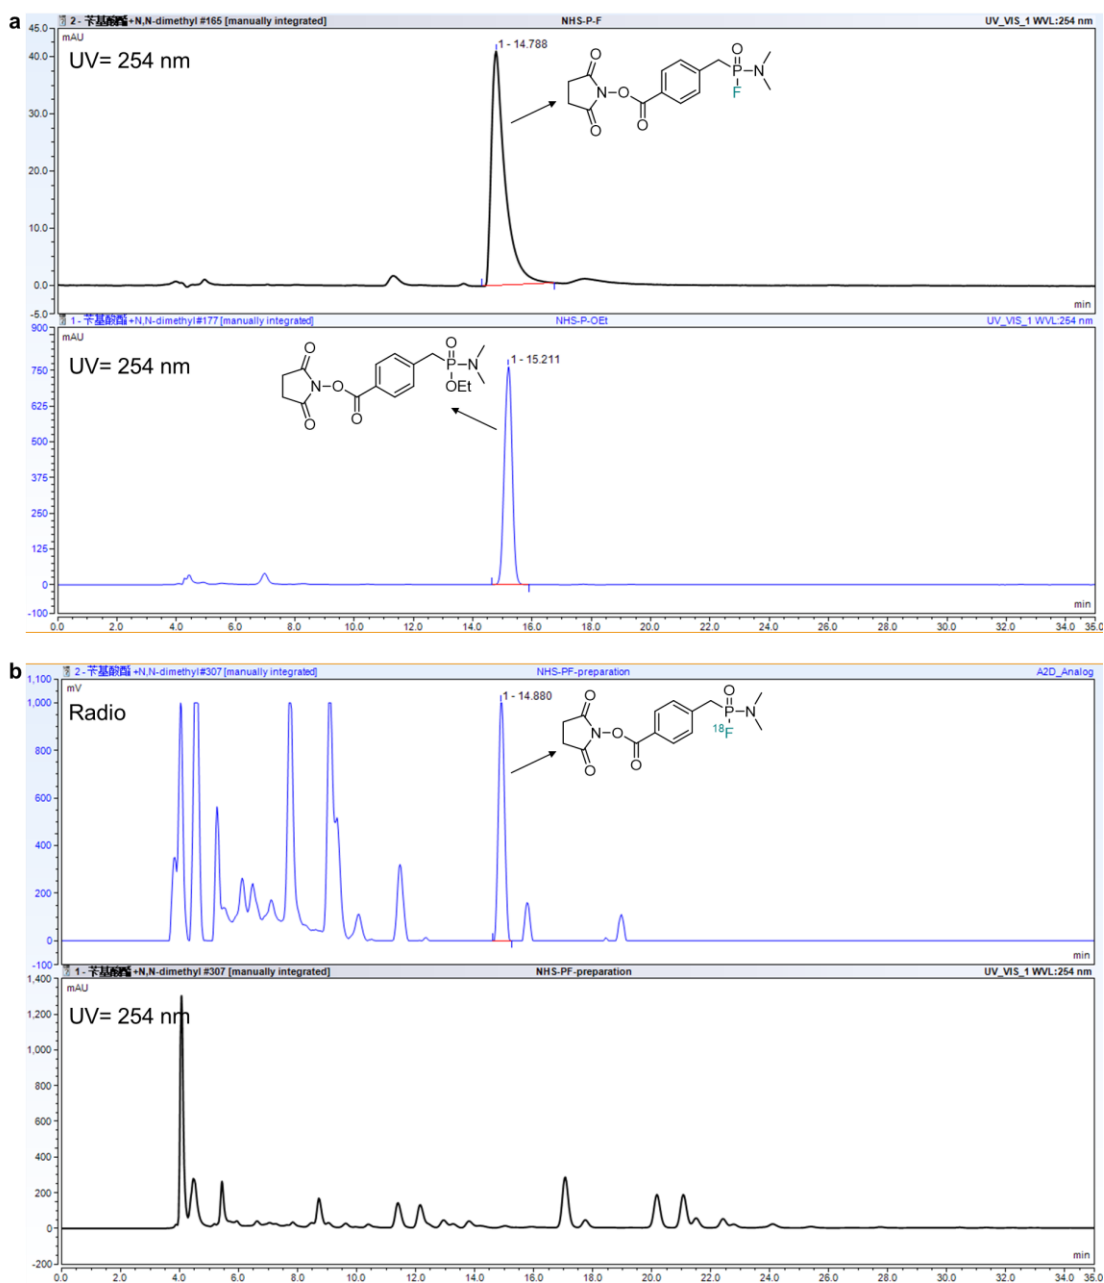

**Fig. S12: a.** HPLC traces of precursor and reference compounds; **b.** HPLC traces of crude  $^{18}\text{F}$ -labeled products. 1# HPLC conditions; SEP Basic-C18 semi-preparative column (120A  $5\mu\text{m}$   $10 \times 250\text{mm}$ ); isocratic elution, 0–20 min, from 30% of  $\text{CH}_3\text{CN}$  and 70% of water containing 0.1%TFA to 40% of  $\text{CH}_3\text{CN}$  and 60% of water containing 0.1%TFA; from 40% of  $\text{CH}_3\text{CN}$  and 60% of water containing 0.1%TFA to 50% of  $\text{CH}_3\text{CN}$  and 50% of water containing 0.1%TFA; flow rate: 3.0 mL/min.

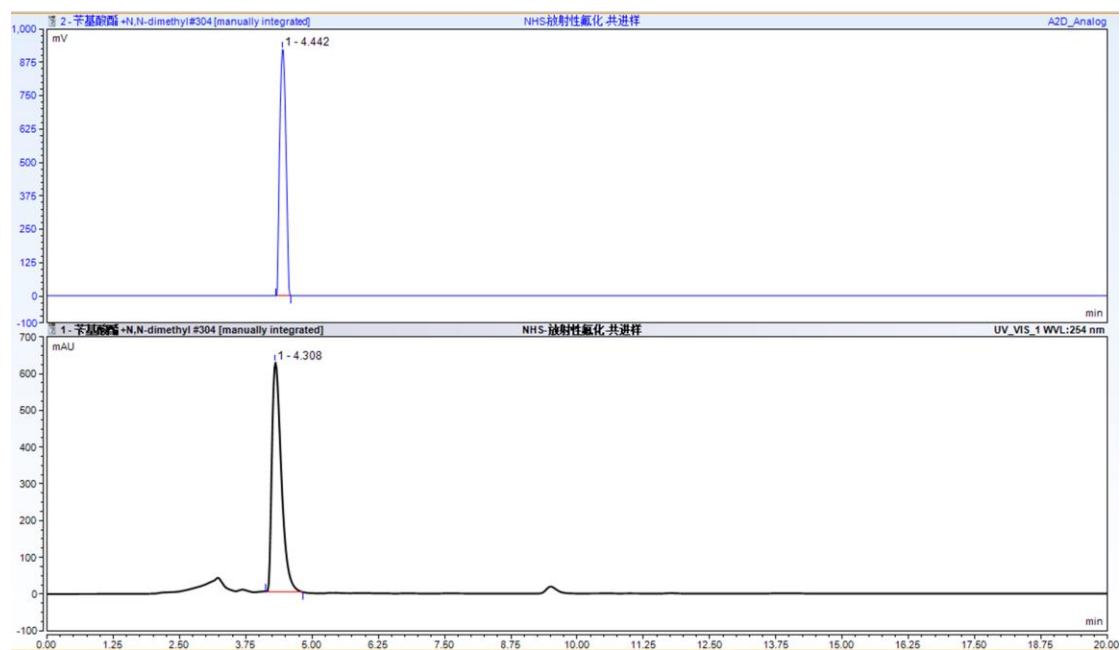

**Fig. S13:** Co-injection for  $[^{18}\text{F}]\mathbf{38}$ . 1# HPLC condition; NanoChrom C18 column ( $5\ \mu\text{m}$ ,  $4.6 \times 250\ \text{mm}$ ), isocratic elution, water containing 0.1%TFA/ $\text{CH}_3\text{CN} = 45/55$ , and the flow rate was 1 mL/min for 20 min. The RCP was  $> 99\%$ .

### Preparation of $[^{18}\text{F}]\mathbf{39}$

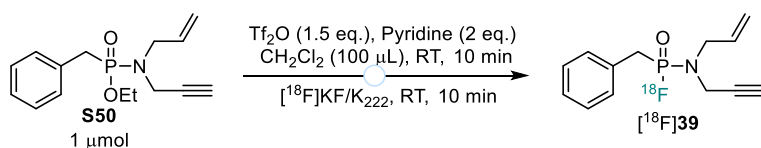

**Table S9.** Average radiochemical conversion for  $[^{18}\text{F}]\mathbf{39}$

| Run                    | 1  | 2  | 3  | Average    |
|------------------------|----|----|----|------------|
| RCC <sub>TLC</sub> (%) | 73 | 85 | 72 | $77 \pm 7$ |

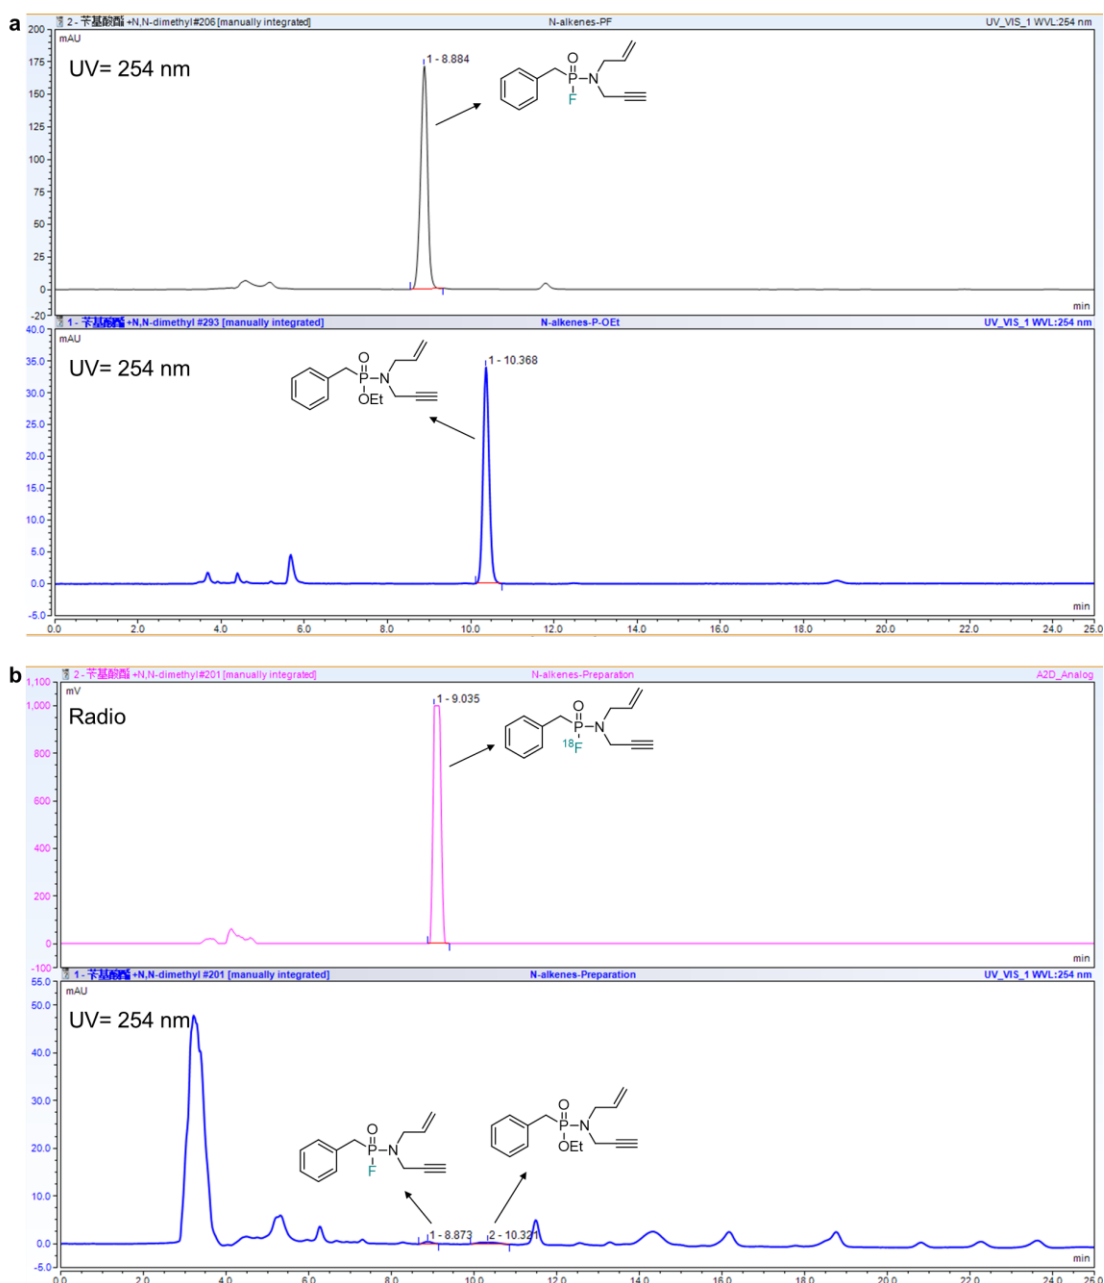

**Fig. S14:** **a.** HPLC traces of precursor and reference compounds; **b.** HPLC traces of crude  $^{18}\text{F}$ -labeled products. 1# HPLC conditions; SEP Basic-C18 semi-preparative column (120A  $5\mu\text{m}$   $10 \times 250\text{mm}$ ); isocratic elution, 0–10 min, from 50% of  $\text{CH}_3\text{CN}$  and 50% of water containing 0.1%TFA to 65% of  $\text{CH}_3\text{CN}$  and 35% of water containing 0.1%TFA; from 65% of  $\text{CH}_3\text{CN}$  and 35% of water containing 0.1%TFA to 70% of  $\text{CH}_3\text{CN}$  and 30% of water containing 0.1%TFA; flow rate: 3.0 mL/min.

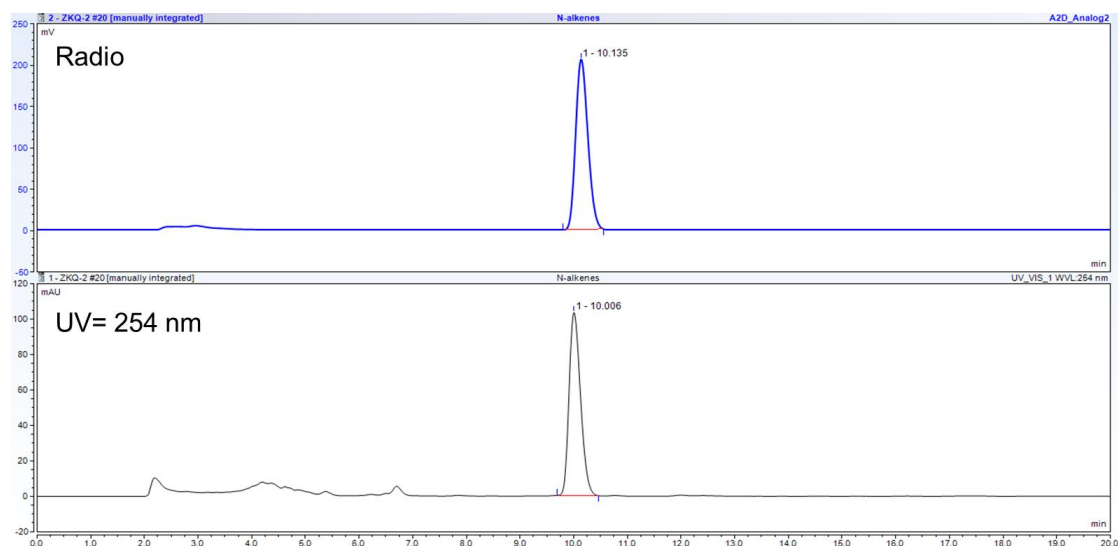

**Fig. S15:** Co-injection for  $[^{18}\text{F}]\mathbf{39}$ . 1# HPLC condition; NanoChrom C18 column (5  $\mu\text{m}$ ,  $4.6 \times 250$  mm), isocratic elution, water containing 0.1%TFA/ $\text{CH}_3\text{CN} = 50/50$ , and the flow rate was 1 mL/min for 20 min. The RCP was  $>97\%$ .

### Preparation of $[^{18}\text{F}]\mathbf{40}$

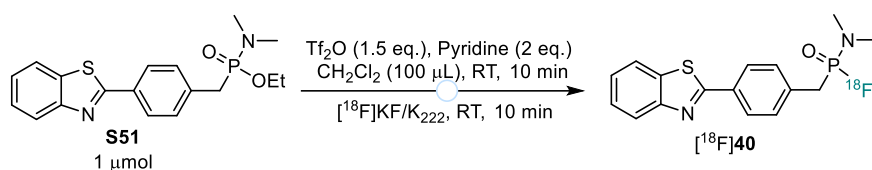

**Table S10.** Average radiochemical conversion for  $[^{18}\text{F}]\mathbf{40}$

| Run                    | 1  | 2  | 3  | Average    |
|------------------------|----|----|----|------------|
| RCC <sub>TLC</sub> (%) | 61 | 59 | 55 | $58 \pm 3$ |

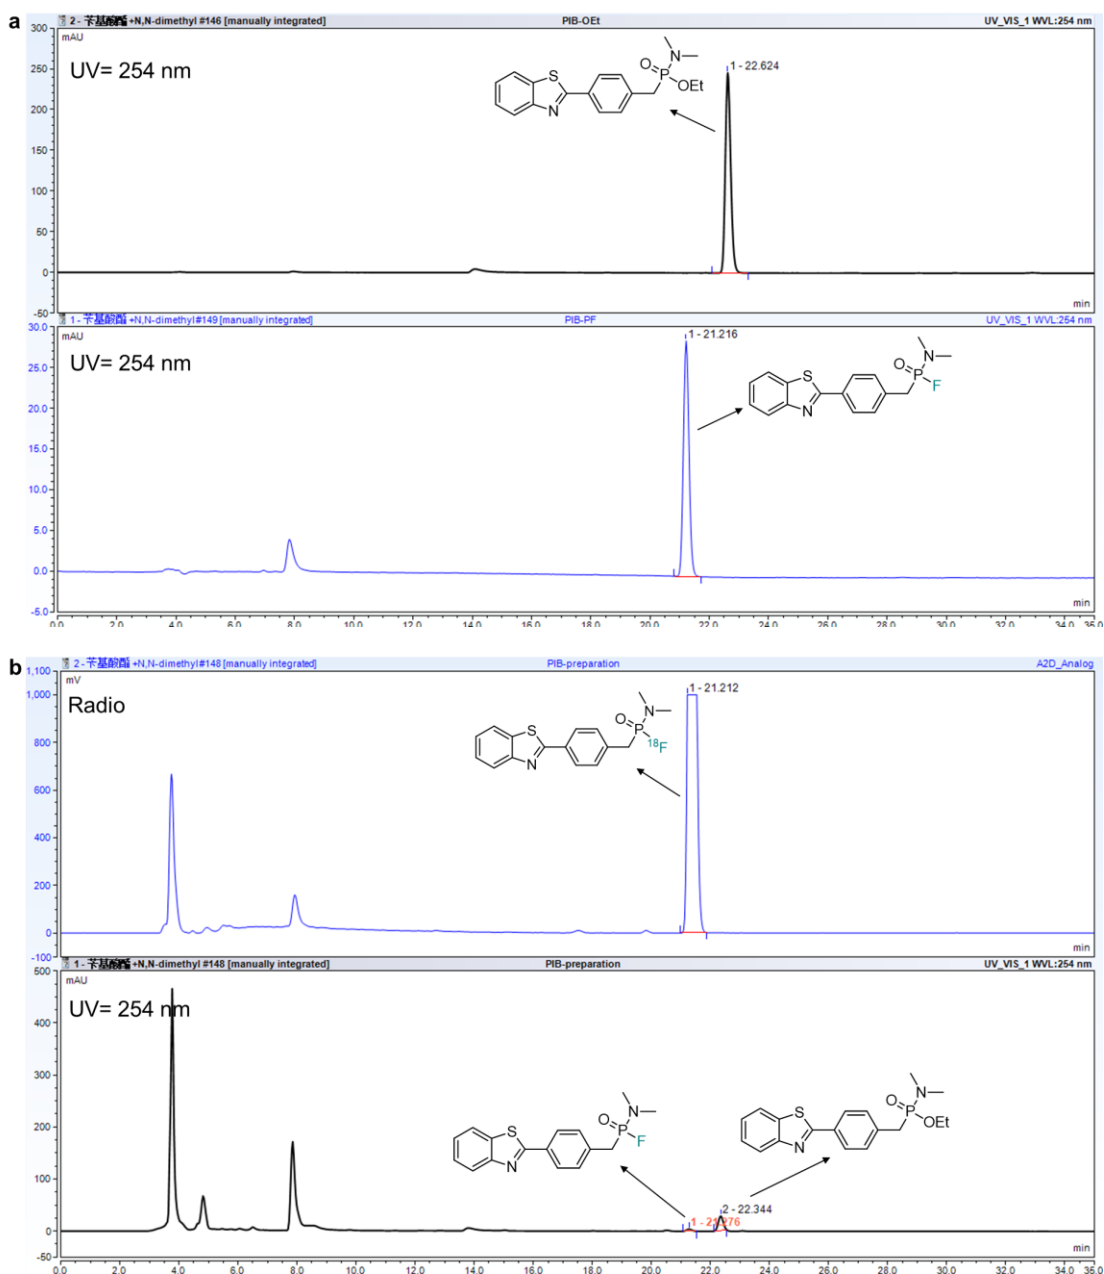

**Fig. S16:** **a.** HPLC traces of precursor and reference compounds; **b.** HPLC traces of crude  $^{18}\text{F}$ -labeled products. 1# HPLC conditions; SEP Basic-C18 semi-preparative column (120A  $5\mu\text{m}$   $10 \times 250\text{mm}$ ); isocratic elution, 0–10 min, from 40% of  $\text{CH}_3\text{CN}$  and 60% of water containing 0.1%TFA to 50% of  $\text{CH}_3\text{CN}$  and 50% of water containing 0.1%TFA; 10–15 min, from 50% of  $\text{CH}_3\text{CN}$  and 50% of water containing 0.1%TFA to 55% of  $\text{CH}_3\text{CN}$  and 45% of water containing 0.1%TFA; 15–18 min, from 55% of  $\text{CH}_3\text{CN}$  and 45% of water containing 0.1%TFA to 60% of  $\text{CH}_3\text{CN}$  and 40% of water containing 0.1%TFA; 18–35 min, 60% of  $\text{CH}_3\text{CN}$  and 40% of water containing 0.1%TFA; flow rate: 3.0 mL/min.



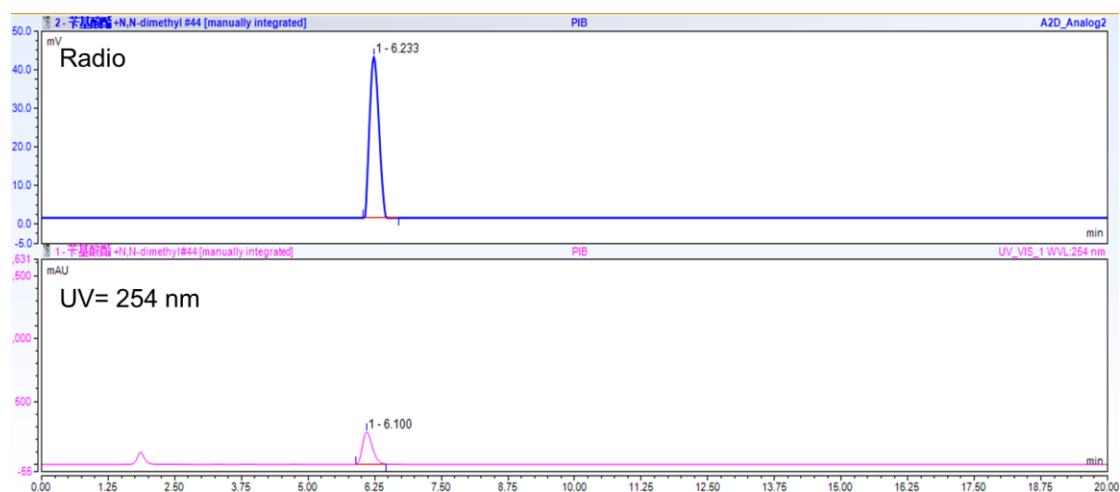

**Fig. S17:** Co-injection for [ $^{18}\text{F}$ ]40. 1# HPLC condition; NanoChrom C18 column (5  $\mu\text{m}$ , 4.6  $\times$  250 mm), isocratic elution,  $\text{H}_2\text{O}/\text{CH}_3\text{CN} = 50/50$ , and the flow rate was 1 mL/min for 20 min. The RCP was >99%.

### Preparation of [ $^{18}\text{F}$ ]41

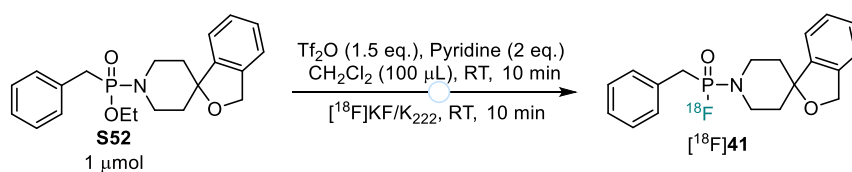

**Table S11:** Average radiochemical conversion for [ $^{18}\text{F}$ ]41

| Run                    | 1  | 2  | 3  | Average     |
|------------------------|----|----|----|-------------|
| RCC <sub>TLC</sub> (%) | 38 | 58 | 57 | 51 $\pm$ 11 |

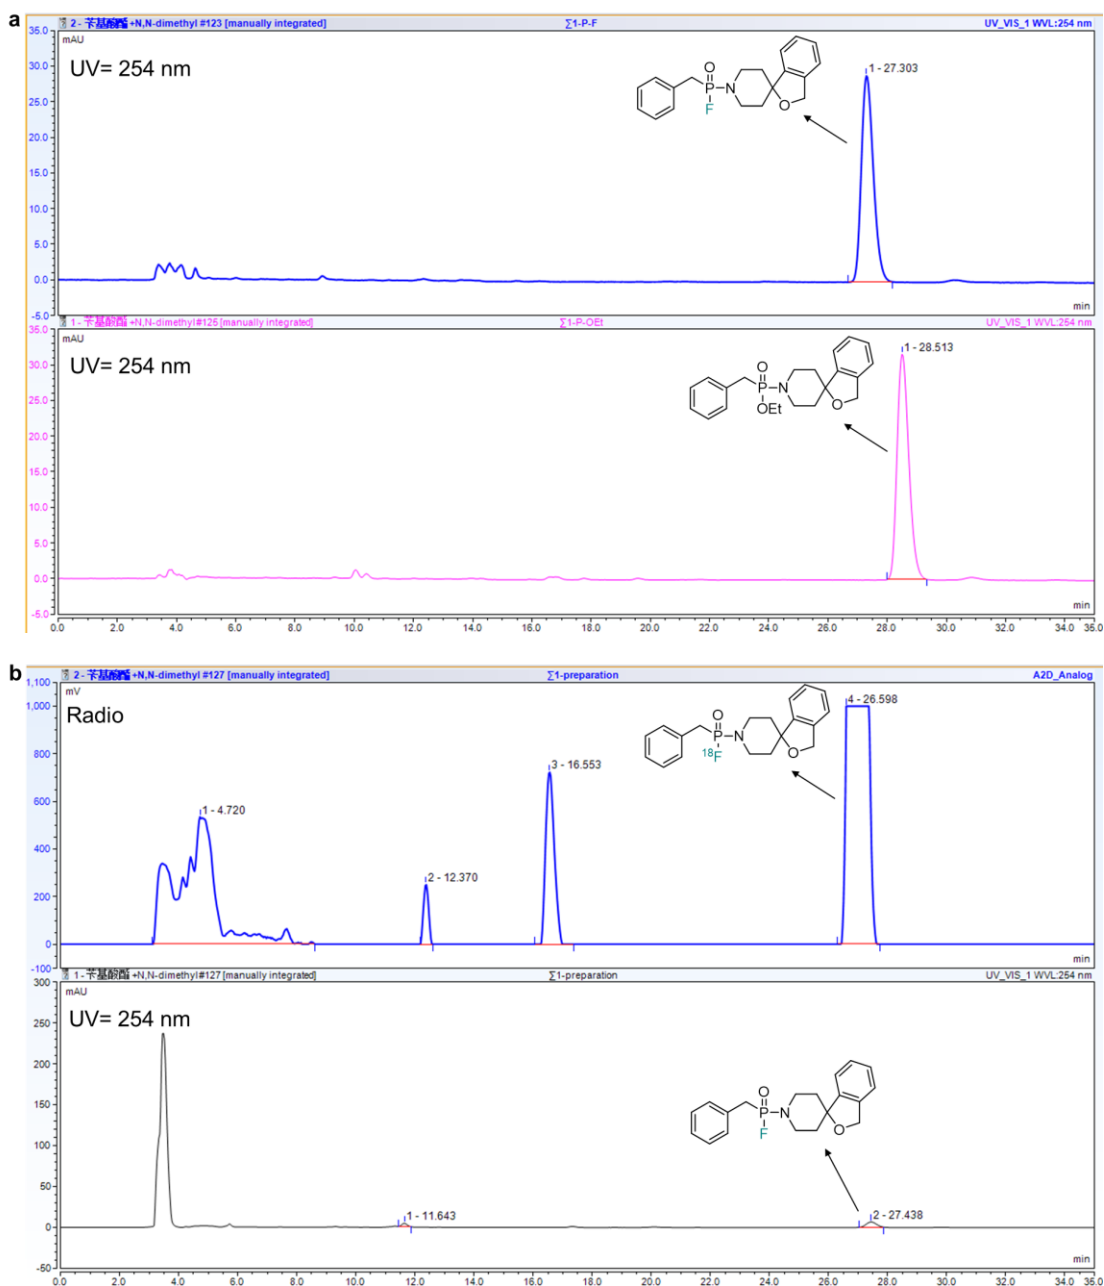

**Fig. S18:** **a.** HPLC traces of precursor and reference compounds; **b.** HPLC traces of crude  $^{18}\text{F}$ -labeled products. 1# HPLC conditions; SEP Basic-C18 semi-preparative column (120A  $5\mu\text{m}$   $10 \times 250\text{mm}$ ); isocratic elution, 0–10 min, from 40% of  $\text{CH}_3\text{CN}$  and 60% of water containing 0.1%TFA to 50% of  $\text{CH}_3\text{CN}$  and 50% of water containing 0.1%TFA; 10–20 min, 50% of  $\text{CH}_3\text{CN}$  and 50% of water containing 0.1%TFA for 10 min; 20–35 min, from 50% of  $\text{CH}_3\text{CN}$  and 50% of water containing 0.1%TFA to 55% of  $\text{CH}_3\text{CN}$  and 45% of water containing 0.1%TFA; flow rate: 3.0 mL/min.

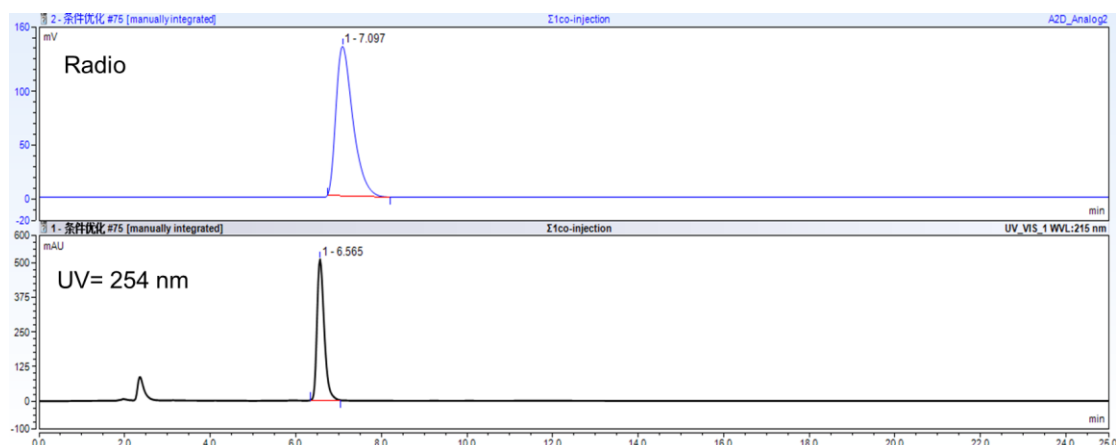

**Fig. S19:** Co-injection for  $[^{18}\text{F}]\mathbf{41}$ . 2# HPLC condition; NanoChrom C18 column (5  $\mu\text{m}$ ,  $4.6 \times 250$  mm), isocratic elution,  $\text{H}_2\text{O}/\text{CH}_3\text{CN} = 35/65$ , and the flow rate was 1 mL/min for 25 min. The RCP was  $> 99\%$ .

### Preparation of $[^{18}\text{F}]\mathbf{42}$

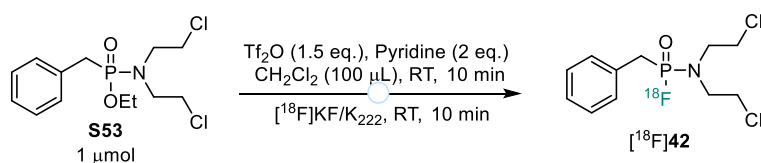

**Table S12:** Average radiochemical conversion for  $[^{18}\text{F}]\mathbf{42}$

| Run                    | 1  | 2  | 3  | Average     |
|------------------------|----|----|----|-------------|
| RCC <sub>TLC</sub> (%) | 86 | 62 | 77 | $75 \pm 12$ |

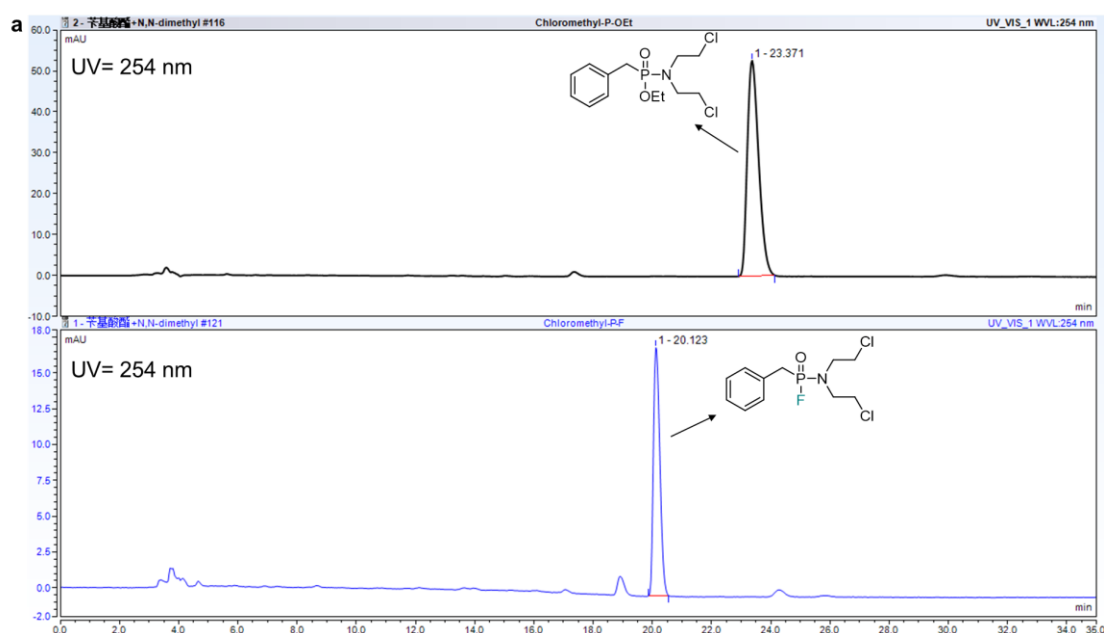

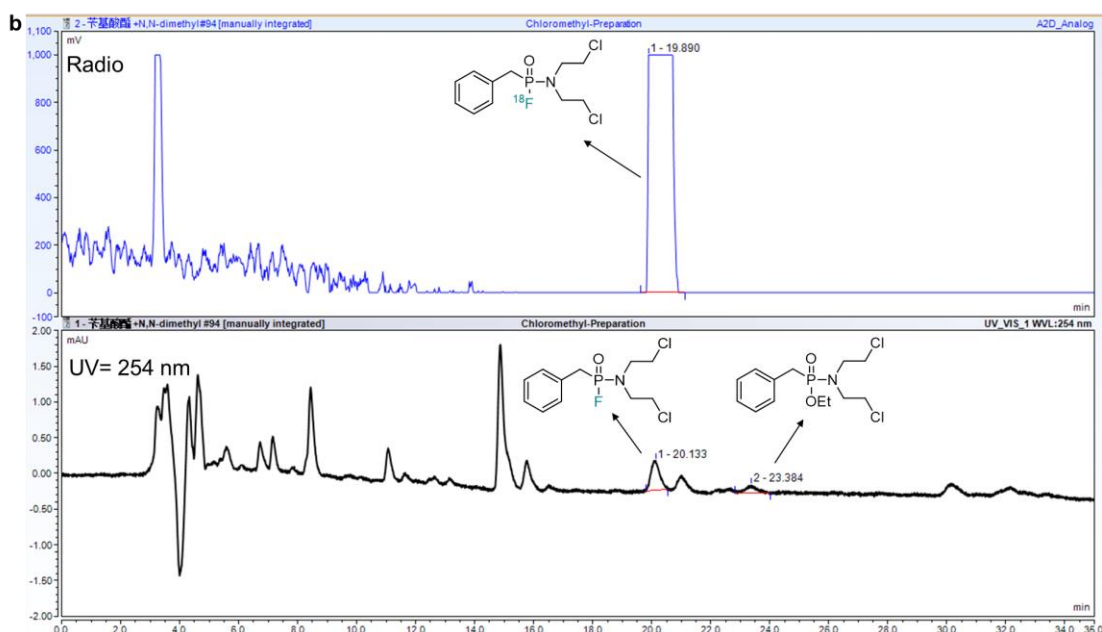

**Fig. S20:** a. HPLC traces of precursor and reference compounds; b. HPLC traces of crude  $^{18}\text{F}$ -labeled products. 1# HPLC conditions; SEP Basic-C18 semi-preparative column (120A  $5\mu\text{m}$   $10 \times 250\text{mm}$ ); isocratic elution, 0–10 min, from 40% of  $\text{CH}_3\text{CN}$  and 60% of water containing 0.1%TFA to 50% of  $\text{CH}_3\text{CN}$  and 50% of water containing 0.1%TFA; 10–20 min, 50% of  $\text{CH}_3\text{CN}$  and 50% of water containing 0.1%TFA; 20–35 min, from 50% of  $\text{CH}_3\text{CN}$  and 50% of water containing 0.1%TFA to 55% of  $\text{CH}_3\text{CN}$  and 45% of water containing 0.1%TFA; flow rate: 3.0 mL/min.

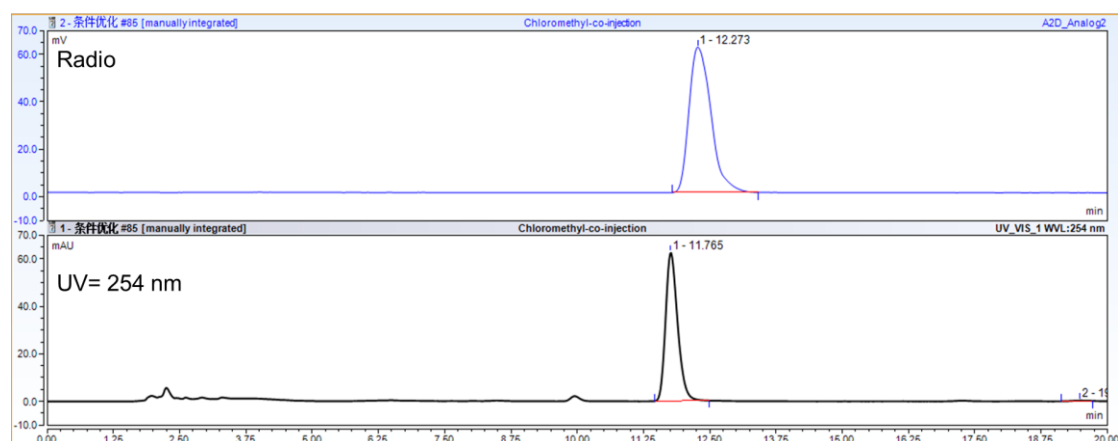

**Fig. S21:** Co-injection for  $^{18}\text{F}$ 42. 2# HPLC condition: NanoChrom C18 column ( $5\mu\text{m}$ ,  $4.6 \times 250\text{mm}$ ), isocratic elution,  $\text{H}_2\text{O}/\text{CH}_3\text{CN} = 50/50$ , and the flow rate was 1 mL/min for 20 min. The RCP was  $> 99\%$ .

## Preparation of [<sup>18</sup>F]43

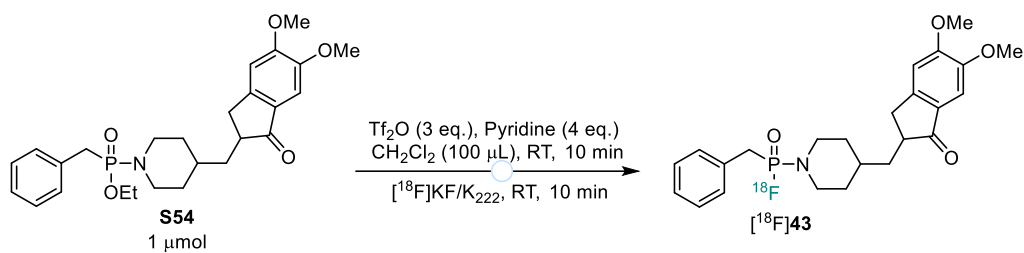

**Table S13:** Average radiochemical conversion for [<sup>18</sup>F]43

| Run                    | 1  | 2  | 3  | Average |
|------------------------|----|----|----|---------|
| RCC <sub>TLC</sub> (%) | 63 | 57 | 64 | 61 ± 4  |

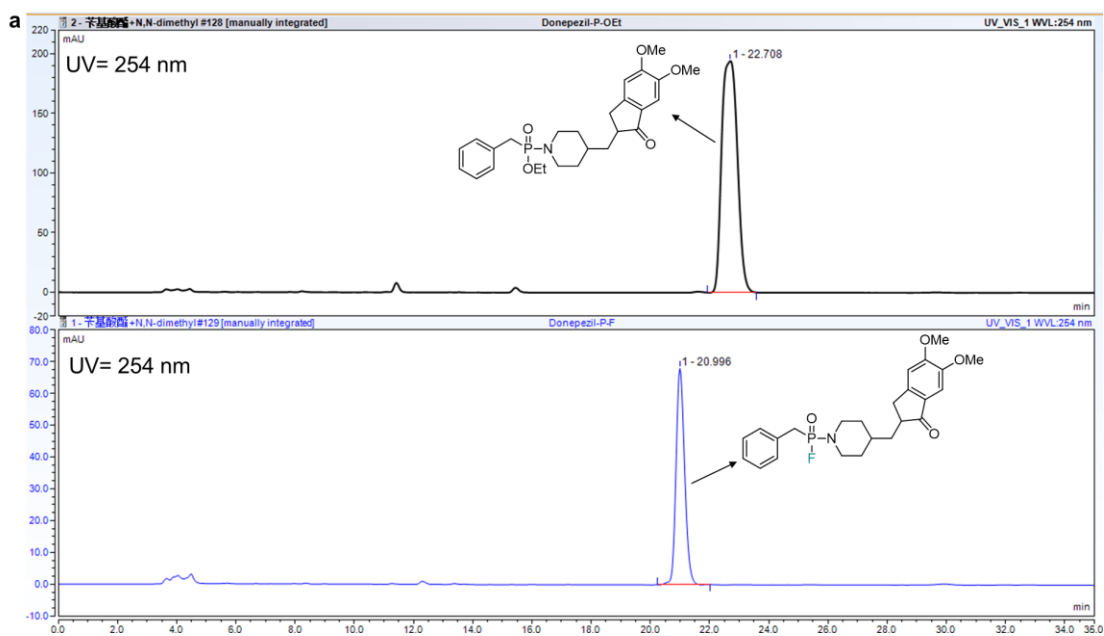

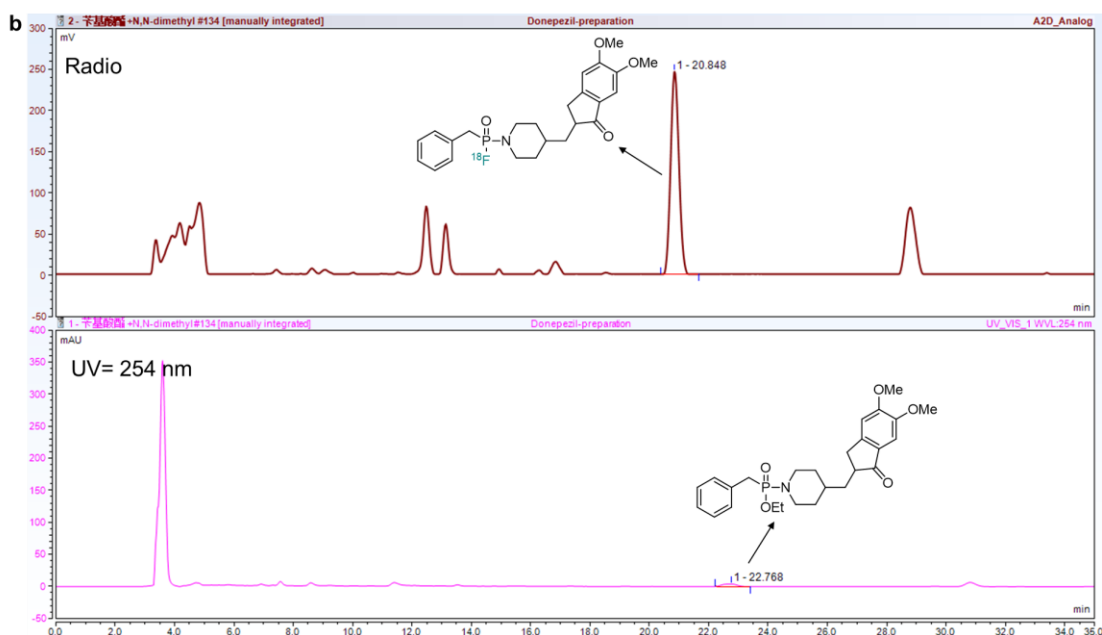

**Fig. S22:** **a.** HPLC traces of precursor and reference compounds; **b.** HPLC traces of crude  $^{18}\text{F}$ -labeled products. 1# HPLC conditions; SEP Basic-C18 semi-preparative column (120A  $5\mu\text{m}$   $10 \times 250\text{mm}$ ); isocratic elution, 0–10 min, from 40% of  $\text{CH}_3\text{CN}$  and 60% of water containing 0.1%TFA to 50% of  $\text{CH}_3\text{CN}$  and 50% of water containing 0.1%TFA; 10–20 min, 50% of  $\text{CH}_3\text{CN}$  and 50% of water containing 0.1%TFA; 20–35 min, from 50% of  $\text{CH}_3\text{CN}$  and 50% of water containing 0.1%TFA to 55% of  $\text{CH}_3\text{CN}$  and 45% of water containing 0.1%TFA; flow rate: 3.0 mL/min.

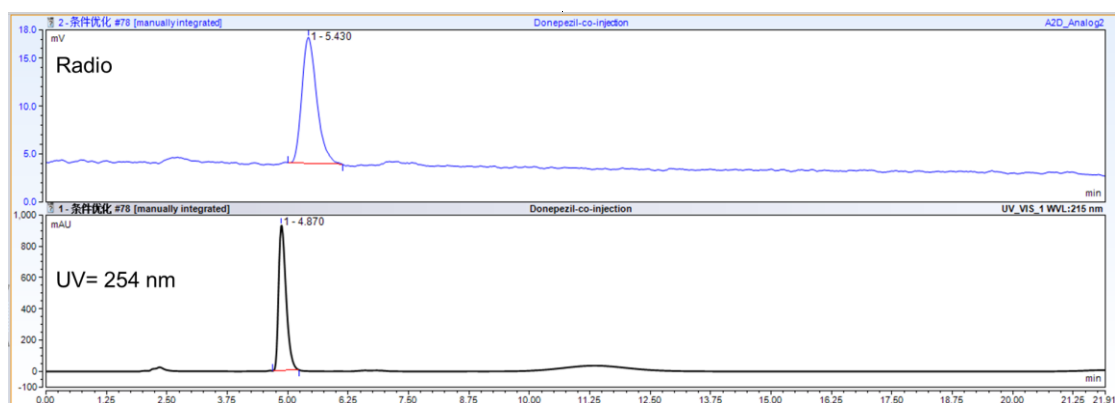

**Fig. S23:** Co-injection for  $[^{18}\text{F}]\mathbf{43}$ . 2# HPLC condition; NanoChrom C18 column ( $5\mu\text{m}$ ,  $4.6 \times 250\text{mm}$ ), isocratic elution,  $\text{H}_2\text{O}/\text{CH}_3\text{CN} = 35/65$ , and the flow rate was 1 mL/min for 20 min. The RCP was  $> 97\%$ .

## Preparation of [<sup>18</sup>F]44

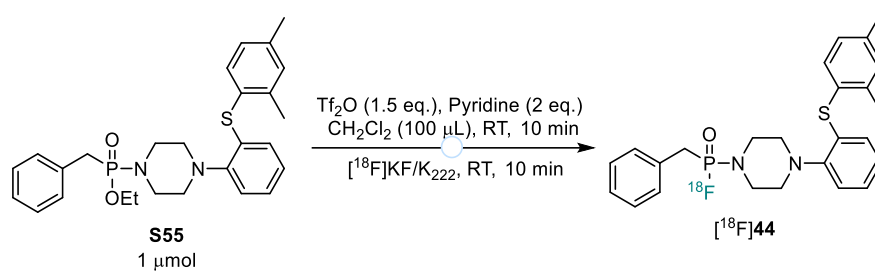

**Table S14:** Average radiochemical conversion for [<sup>18</sup>F]44

| Run                    | 1  | 2  | 3  | Average |
|------------------------|----|----|----|---------|
| RCC <sub>TLC</sub> (%) | 67 | 66 | 71 | 68 ± 2  |

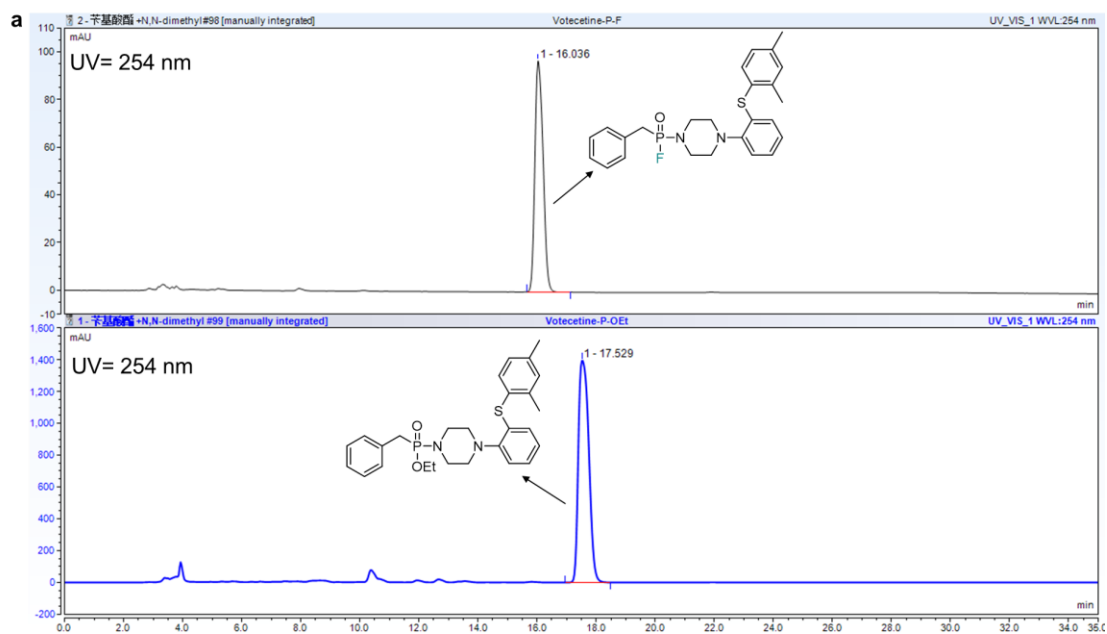

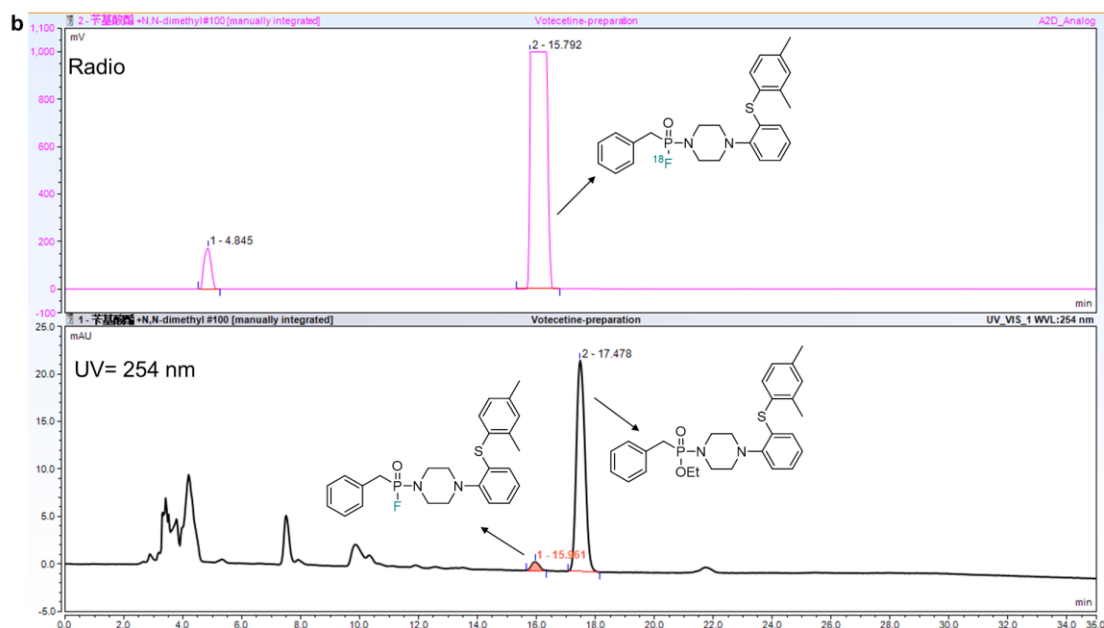

**Fig. S24:** a. HPLC traces of precursor and reference compounds; b. HPLC traces of crude  $^{18}\text{F}$ -labeled products. 1# HPLC conditions; SEP Basic-C18 semi-preparative column (120A  $5\mu\text{m}$   $10 \times 250\text{mm}$ ); isocratic elution, 0–15 min, from 80% of  $\text{CH}_3\text{CN}$  and 20% of water containing 0.1%TFA to 85% of  $\text{CH}_3\text{CN}$  and 15% of water containing 0.1%TFA; 15–25 min, 85% of  $\text{CH}_3\text{CN}$  and 15% of water containing 0.1%TFA; 25–35 min, from 85% of  $\text{CH}_3\text{CN}$  and 15% of water containing 0.1%TFA to 90% of  $\text{CH}_3\text{CN}$  and 10% of water containing 0.1%TFA; flow rate: 3.0 mL/min.

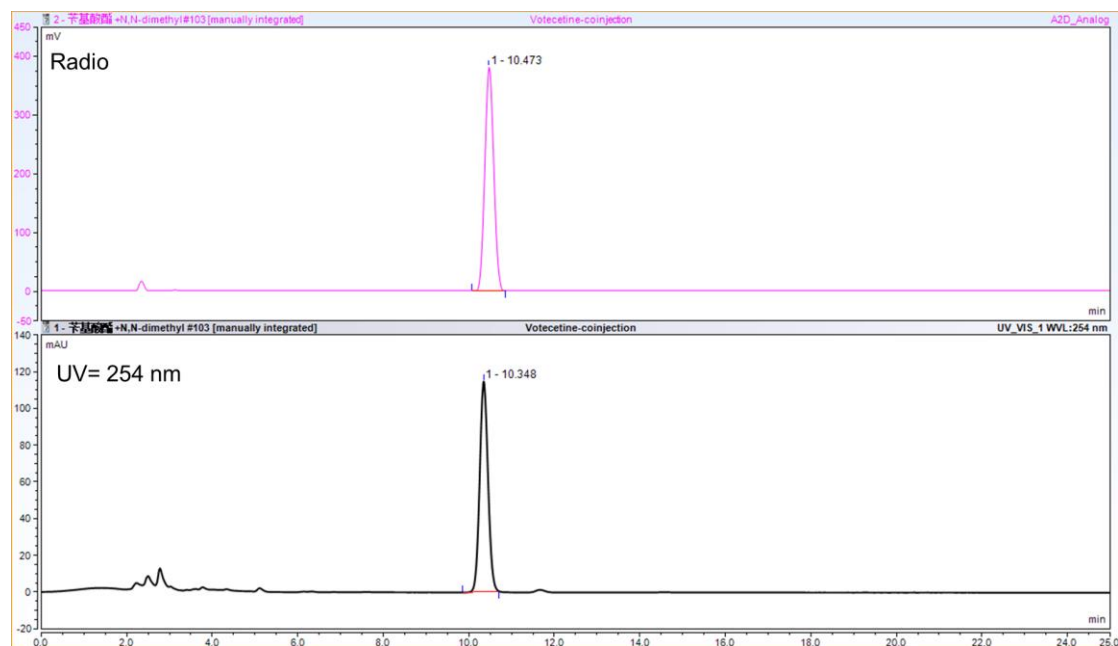

**Fig. S25:** Co-injection for  $^{18}\text{F}$ 44. 1# HPLC condition: NanoChrom C18 column ( $5\mu\text{m}$ ,  $4.6 \times 250\text{mm}$ ), isocratic elution, water containing 0.1%TFA/ $\text{CH}_3\text{CN}$  = 50/50, and the flow



rate was 1 mL/min for 20 min. The RCP was > 98%.

### Preparation of [<sup>18</sup>F]45

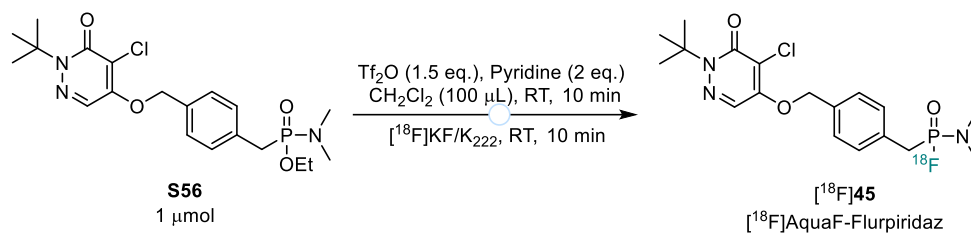

**Table S15.** Average radiochemical conversion for [<sup>18</sup>F]45

| Run                    | 1  | 2  | 3  | Average |
|------------------------|----|----|----|---------|
| RCC <sub>TLC</sub> (%) | 65 | 59 | 47 | 57 ± 9  |

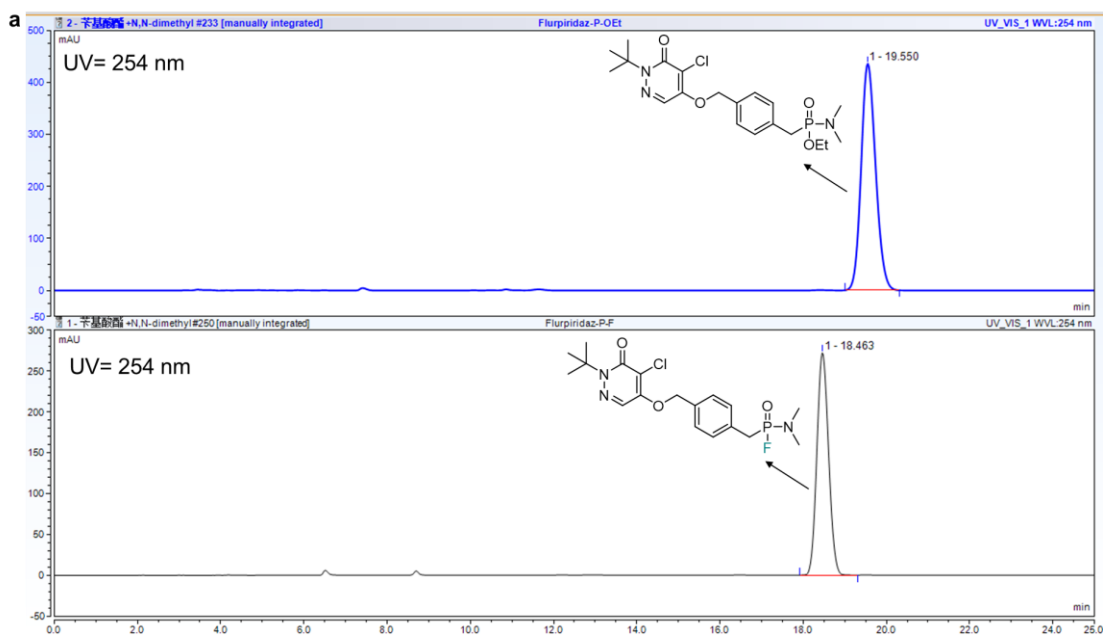

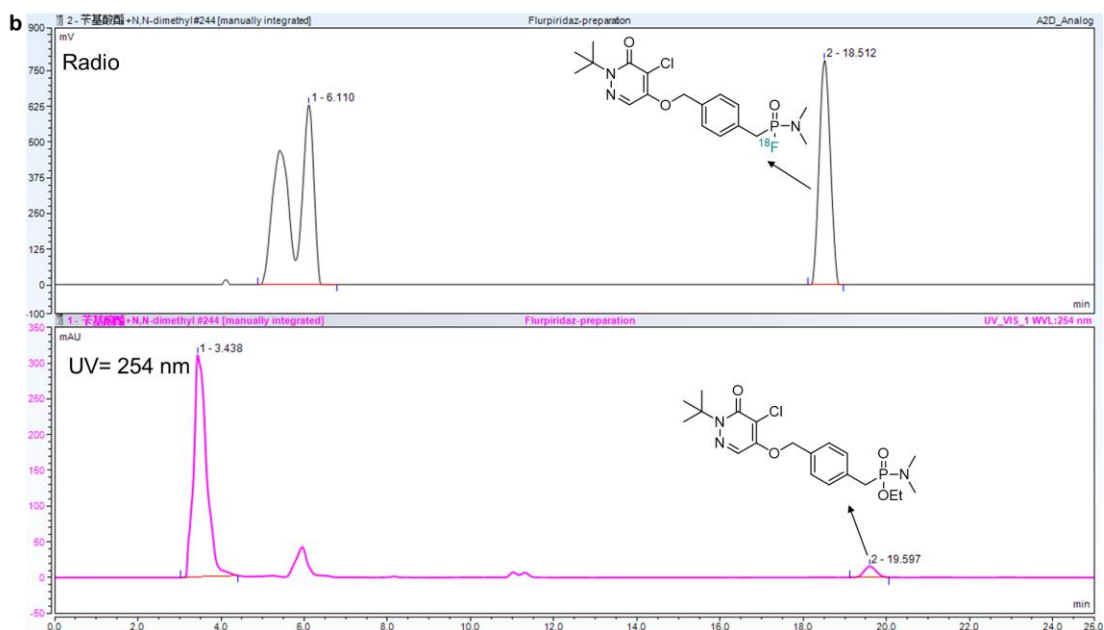

**Fig. S26:** a. HPLC traces of precursor and reference compounds; b. HPLC traces of crude  $^{18}\text{F}$ -labeled products. 1# HPLC conditions; SEP Basic-C18 semi-preparative column (120A  $5\mu\text{m}$   $10 \times 250\text{mm}$ ); elution: isocratic elution, water containing 0.1%TFA/ $\text{CH}_3\text{CN}$  = 50/50, and the flow rate was 3 mL/min for 25 min.

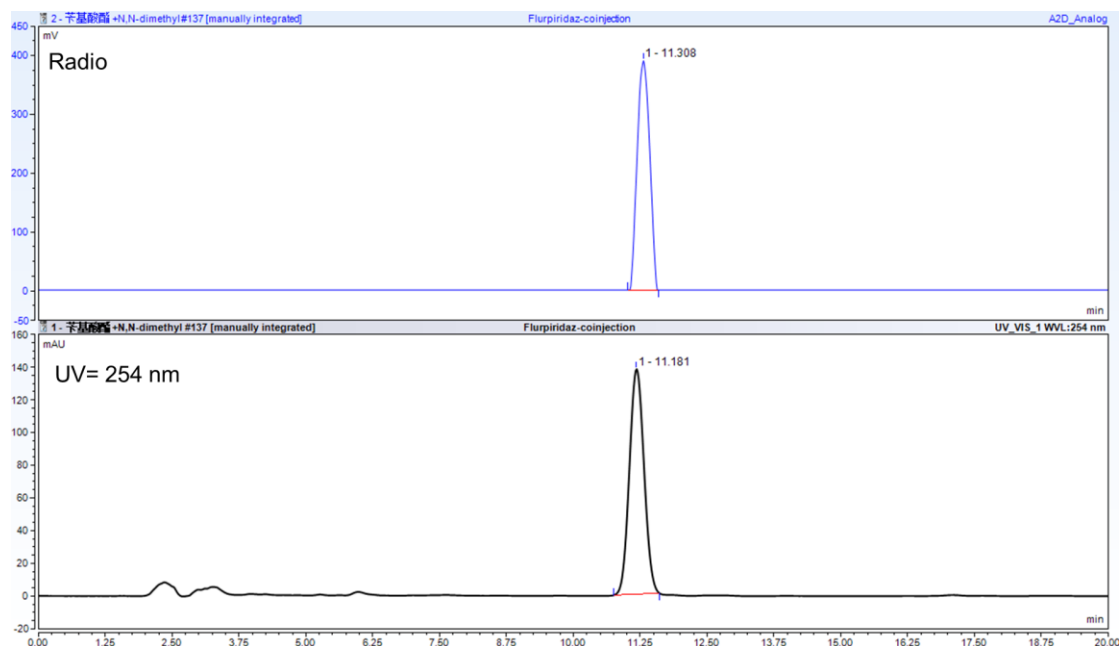

**Fig. S27:** Co-injection for  $^{18}\text{F}$ 45. 1# HPLC condition: NanoChrom C18 column ( $5\mu\text{m}$ ,  $4.6 \times 250\text{mm}$ ), isocratic elution,  $\text{H}_2\text{O}/\text{CH}_3\text{CN}$  = 50/50, and the flow rate was 1 mL/min for 20 min. The RCP was >98%.

## Preparation of BFPA-E[c(RGDyK)]<sub>2</sub>

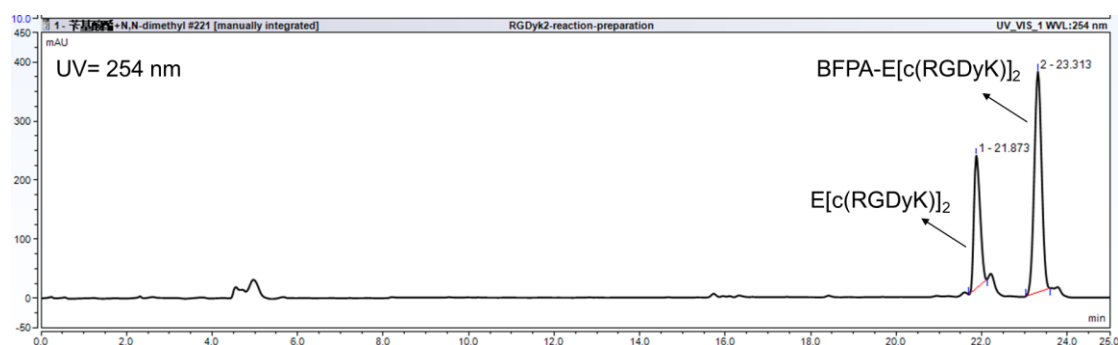

**Fig. S28:** HPLC traces of crude products. 1# HPLC conditions: SEP Basic-C18 semi-preparative column (120A 5 $\mu$ m 10  $\times$  250mm); gradient elution, 0–10 min, from 10% of CH<sub>3</sub>CN and 90% of water containing 0.1%TFA to 20% of CH<sub>3</sub>CN and 80% of water containing 0.1%TFA; 10–25 min, from 20% of CH<sub>3</sub>CN and 80% of water containing 0.1%TFA to 30% of CH<sub>3</sub>CN and 70% of water containing 0.1%TFA; flow rate: 3.0 mL/min.

## Preparation of [<sup>18</sup>F]BFPA-E[c(RGDyK)]<sub>2</sub>

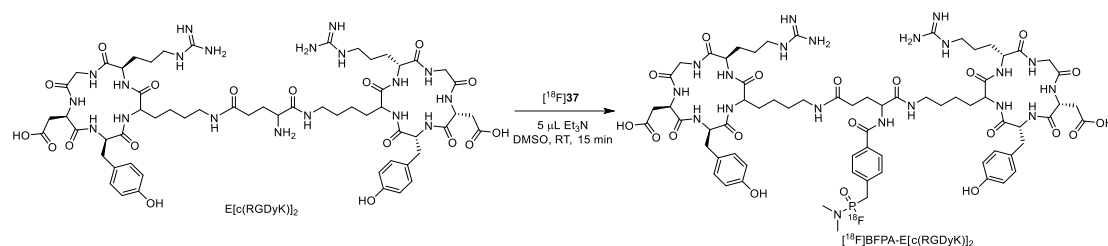

T: FTMS + p ESI Full ms [200.0000-2000.0000]

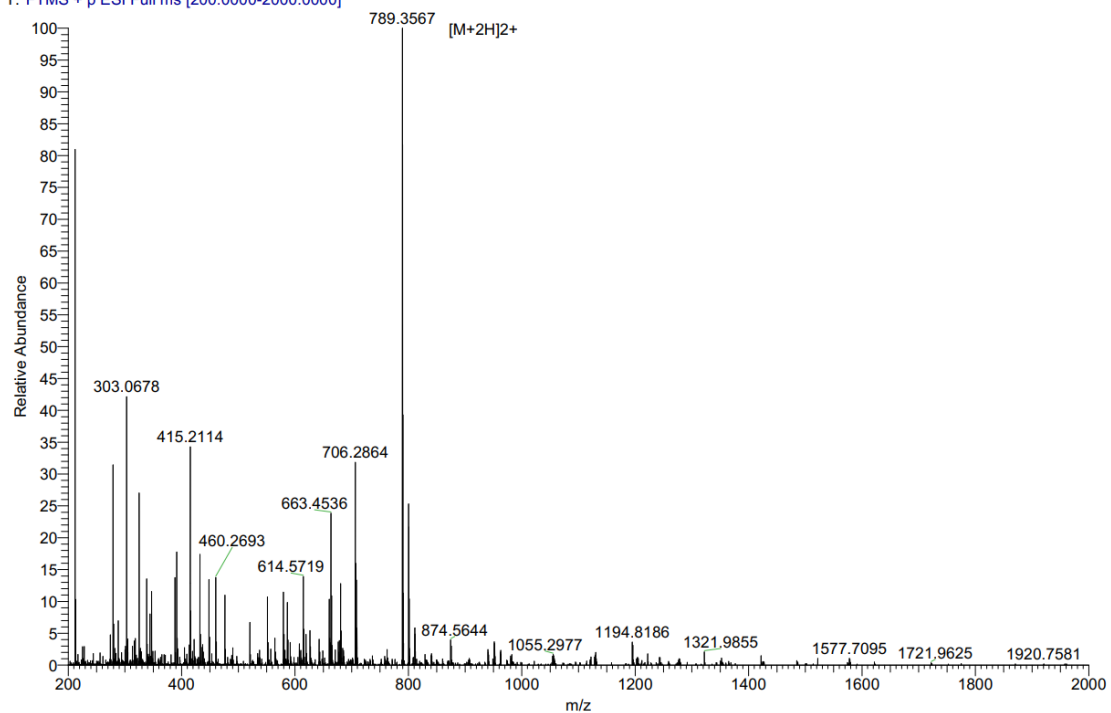

**Fig. S29:** Mass spectrometry identification of standards. **HRMS (m/z)** calculated for  $C_{69}H_{99}FN_{20}O_{20}P^{2+}$  ( $[M+2H]^{2+}$ ): 789.3567 found: 789.3567.

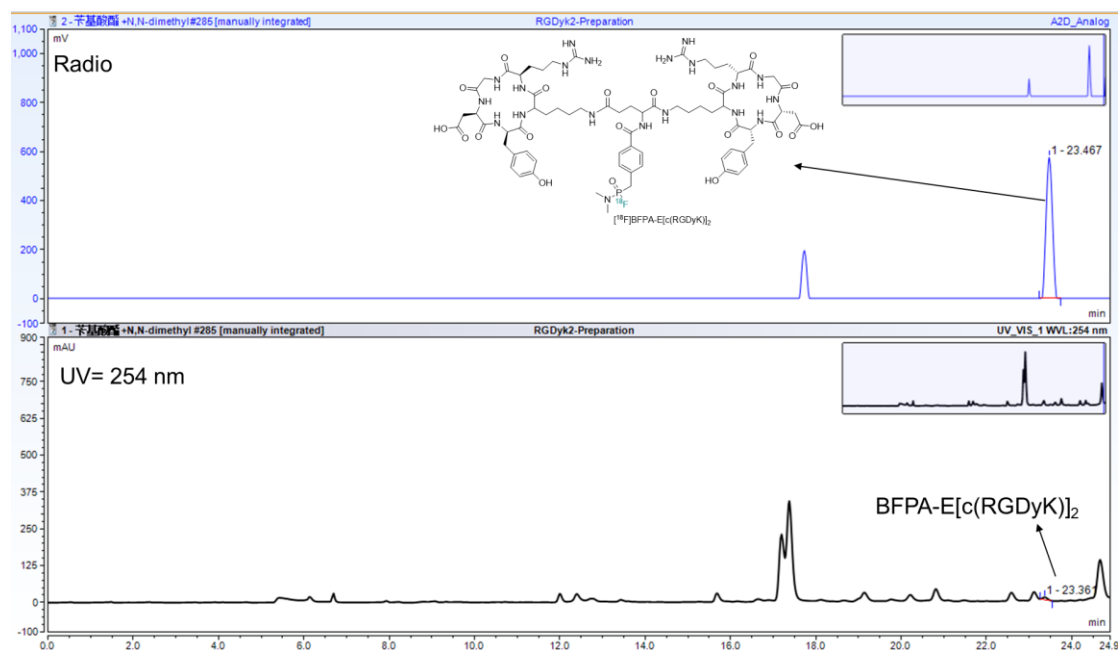

**Fig. S30:** HPLC traces of crude  $^{18}\text{F}$ -labeled products. 1# HPLC conditions: SEP Basic-C18 semi-preparative column (120A  $5\mu\text{m}$   $10 \times 250\text{mm}$ ); gradient elution, 0–10 min, from 10% of  $\text{CH}_3\text{CN}$  and 90% of water containing 0.1%TFA to 20% of  $\text{CH}_3\text{CN}$  and 80% of water containing 0.1%TFA; 10–25 min, from 20% of  $\text{CH}_3\text{CN}$  and 80% of water containing 0.1%TFA to 30% of  $\text{CH}_3\text{CN}$  and 70% of water containing 0.1%TFA; flow rate: 3.0 mL/min.

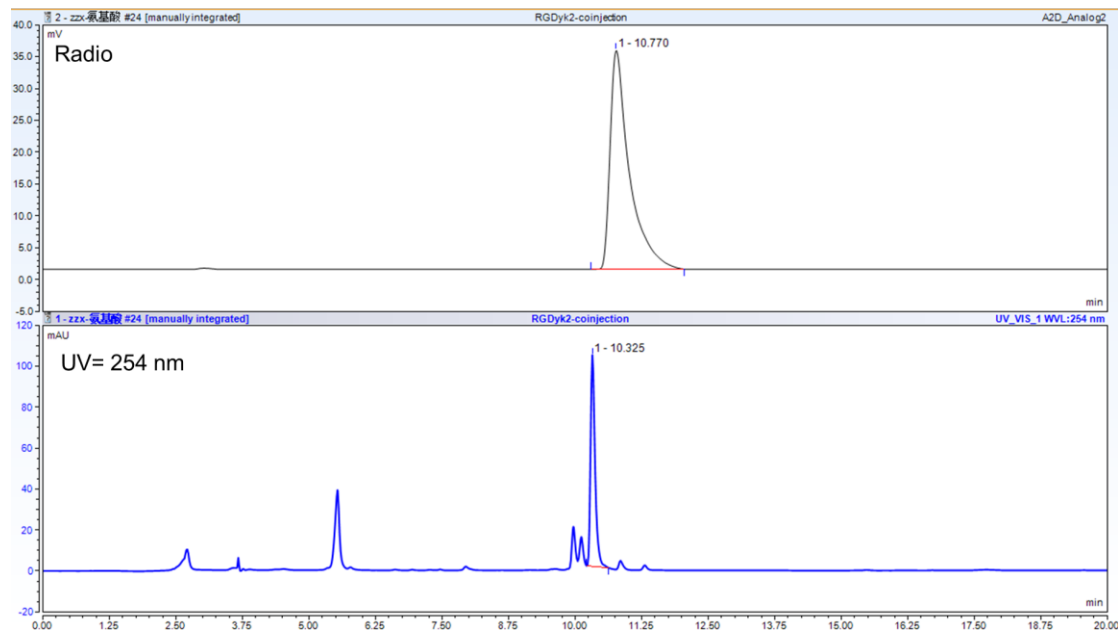

**Fig. S31:** Co-injection for  $^{18}\text{F}$ -BFPA-E[c(RGDyK)]<sub>2</sub>. 2# HPLC condition: NanoChrom C18 column ( $5\mu\text{m}$ ,  $4.6 \times 250\text{mm}$ ), gradient elution, from 10% of  $\text{CH}_3\text{CN}$  and 90% of water containing 0.1%TFA to 50% of  $\text{CH}_3\text{CN}$  and 50% of water containing 0.1%TFA, and the flow rate was 1 mL/min for 20 min. The RCP was  $> 99\%$ .

## 2.4 Automated radiosynthesis

### 2.4.1 Synthesizing [<sup>18</sup>F]42 on an Allinone module

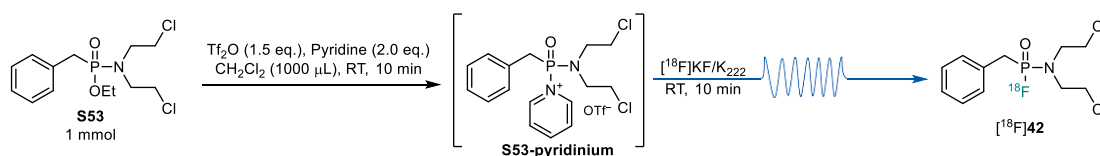

The automated synthesis of [<sup>18</sup>F]42 was performed on an AllinOne module (Trasis, Ans, Belgium) following this stepwise procedure, and the resultant module program was edited in Trasis-AllinOne 2.3.4.

The Sep-Pak<sup>®</sup> Plus Short C18 cartridge and Sep-Pak<sup>®</sup> Light QMA cartridge utilized in the experiment were pre-activated and subsequently loaded into the cartridge as detailed in section 1.3 of this report. Slot 2 was filled with a solution containing 8.0 mg of K<sub>222</sub>, 1.0 mg of K<sub>2</sub>CO<sub>3</sub> in CH<sub>3</sub>CN/H<sub>2</sub>O (4/1, v/v, 0.5 mL) as the eluent. Slot 3 was filled with an anhydrous CH<sub>2</sub>Cl<sub>2</sub> (1.0 mL) solution of the precursor 1-(benzyl(bis(2-chloroethyl)amino)phosphoryl)pyridin-1-ium. The solvent reservoirs (slot 14 and 15) were filled with anhydrous EtOH (~10 mL) and CH<sub>3</sub>CN (~20 mL), respectively, and a water bag was placed in slot 16. During liquid transmission, the dead volume of the corresponding pipeline should be cleared based on the actual situation to ensure the precision of the liquid dosage.

The [<sup>18</sup>F]fluoride obtained from the [<sup>18</sup>O]H<sub>2</sub>O supplied by the cyclotron is captured on the QMA located in slot 5. Subsequently, the QMA is purged with air, followed by the elution of [<sup>18</sup>F]fluoride from the QMA into the reactor using the eluent from slot 2. 1 mL of CH<sub>3</sub>CN is added and then dried under an airflow at 110 °C. Once the drying process is completed and the reactor temperature returns to room temperature, the precursor solution from slot 3 is transferred into the reactor. The resulting mixture is agitated and thoroughly mixed using a syringe in slot 3, with this step repeated twice for homogenization. Subsequently, the loop is purged with 3 mL of air, and the reaction mixture is allowed to proceed at room temperature for 10 min. After the completion of the reaction, 9 mL of water is added to the reactor to dilute the reaction mixture. Subsequently, the organic compounds in the mixture are trapped on the C18 in slot 9. Using a syringe, 10 mL of water is slowly injected into the C18 for washing, followed by air blowing to remove fluoride ions and acidic impurities. Finally, the crude product is eluted with 0.5 mL of CH<sub>3</sub>CN into a transfer vial, and then injected into the HPLC

system for separation. The crude reaction mixture is purified using reverse-phase semi-preparative HPLC (120A 5 $\mu$ m 10  $\times$  250mm). Receive the CH<sub>3</sub>CN/H<sub>2</sub>O mixed solution separated by HPLC in another transfer vial, dilute it with water (10 mL), then concentrate the product on the C18 in slot 13. Dry the captured product with air blowing, then elute the desired [<sup>18</sup>F]**42** into a product vial using 0.5 mL of EtOH. Subsequently, take an appropriate amount for the determination of A<sub>m</sub>.

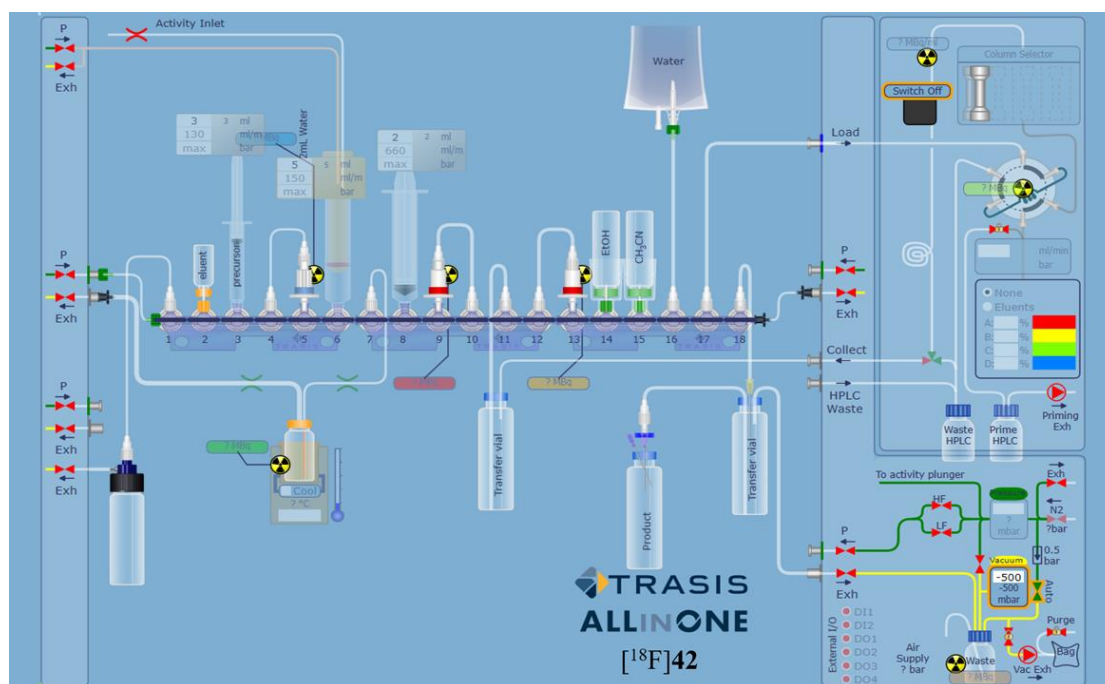

**Fig. S32:** Graphical representation of the cassette designed for the automated synthesis of [<sup>18</sup>F]**42** on a Trasis AllinOne synthesizer.

#### 2.4.2 Molar activity calculations

A<sub>m</sub> values were determined with the separated chemically and radiochemically pure samples > 99% purity samples. The sample was injected into HPLC to record the injection activity and injection time, respectively. Subsequently, the UV signal corresponding to the desired radioactive fluorination product was integrated, the chemical amount of the sample is calculated by the standard curve, and then A<sub>m</sub> is calculated.

#### Molar activity calculation of [<sup>18</sup>F]**37**

The standard curve (**Fig. S33**) of HPLC peak area (UV, 254 nm) versus molar amount of **37** was plotted.

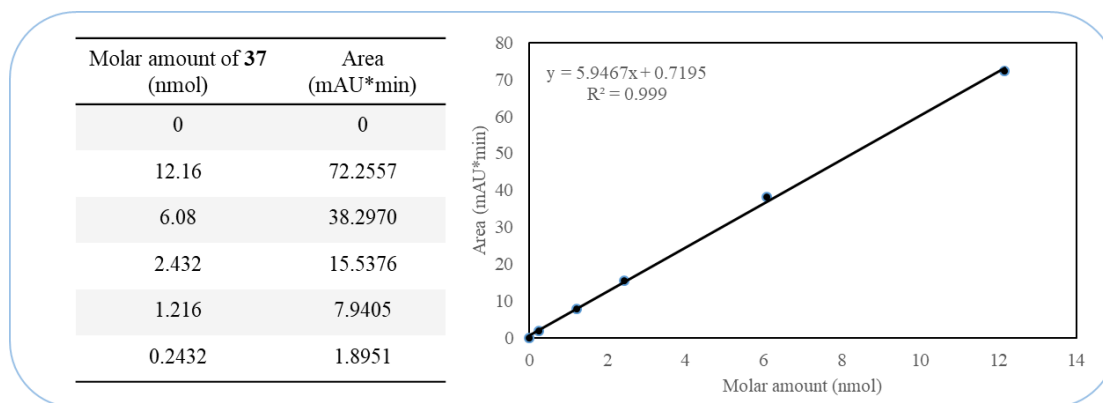

Standard curve equation:  $y = 5.9467x + 0.7195$

**Fig. S33:** Standard curve acquired with **37** at 254 nm

**Table S16:** Molar activity calculation of [<sup>18</sup>F]**37**

| Measurement | Activity injected<br>(MBq, d.c.) | Peak area<br>(mAU*min) | Molar amount<br>( $\mu\text{mol}$ ) | $A_m$<br>(GBq/ $\mu\text{mol}$ ) |
|-------------|----------------------------------|------------------------|-------------------------------------|----------------------------------|
| 1           | 0.402                            | 0.785                  | $1.10 \times 10^{-5}$               | 36.5                             |
| 2           | 2.459                            | 1.028                  | $5.19 \times 10^{-5}$               | 47.4                             |

"d.c." means decay correction.

The isolated [<sup>18</sup>F]**37** has an average  $A_m$  of  $42 \pm 7$  GBq/ $\mu\text{mol}$  ( $n = 2$ ).

#### Molar activity calculation of [<sup>18</sup>F]**40**

The standard curve (**Fig. S34**) of HPLC peak area (UV, 254 nm) versus molar amount of **40** was plotted.

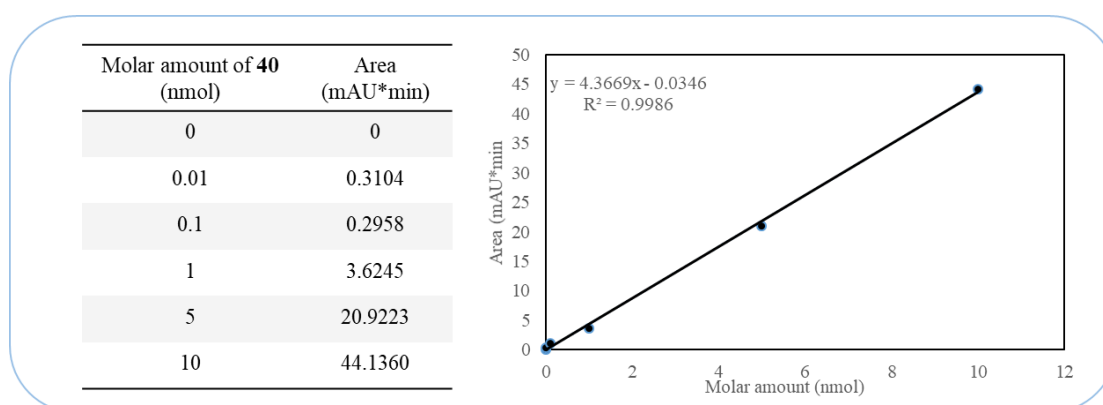

Standard curve equation:  $y = 4.33669x - 0.0346$

**Fig. S34:** Standard curve acquired with [<sup>18</sup>F]**40** at 254 nm



**Table S17:** Molar activity calculation of [<sup>18</sup>F]40

| Measurement | Activity injected<br>(MBq, d.c.) | Peak area<br>(mAU*min) | Molar amount<br>( $\mu\text{mol}$ ) | $A_m$<br>(GBq/ $\mu\text{mol}$ ) |
|-------------|----------------------------------|------------------------|-------------------------------------|----------------------------------|
| 1           | 2.64                             | 0.0852                 | $2.74 \times 10^{-5}$               | 95                               |
| 2           | 3.88                             | 0.1118                 | $3.35 \times 10^{-5}$               | 115.8                            |

The isolated [<sup>18</sup>F]40 has an average  $A_m$  of  $105 \pm 14$  GBq/ $\mu\text{mol}$  ( $n = 2$ ).

### Molar activity calculation of [<sup>18</sup>F]42

The standard curve (Fig. S35) of HPLC peak area (UV, 254 nm) versus molar amount of 42 was plotted.

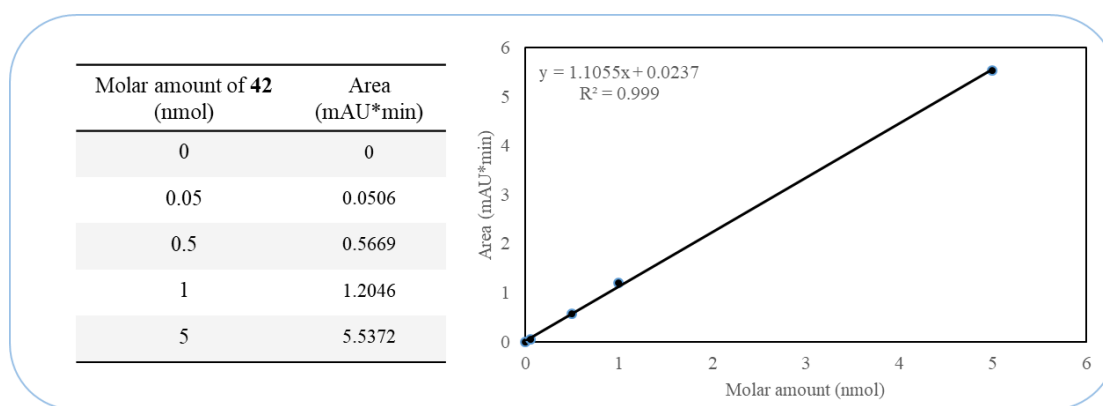

Standard curve equation:  $y = 1.1055x + 0.0237$

**Fig. S35:** Standard curve acquired with 42 at 254 nm**Table S18:** Molar activity calculation of [<sup>18</sup>F]42

| Measurement | Activity injected<br>(MBq, d.c.) | Peak area<br>(mAU*min) | Molar amount<br>( $\mu\text{mol}$ ) | $A_m$<br>(GBq/ $\mu\text{mol}$ ) |
|-------------|----------------------------------|------------------------|-------------------------------------|----------------------------------|
| 1           | 7.08                             | 0.0544                 | $2.778 \times 10^{-5}$              | 254.9                            |
| 2           | 8.03                             | 0.0271                 | $3.076 \times 10^{-5}$              | 261.1                            |
| 3           | 7.41                             | 0.0582                 | $3.121 \times 10^{-5}$              | 237.4                            |

The isolated [<sup>18</sup>F]42 has an average  $A_m$  of  $251 \pm 12$  GBq/ $\mu\text{mol}$  ( $n = 3$ ).

### Molar activity calculation of [<sup>18</sup>F]43

The standard curve (Fig. S36) of HPLC peak area (UV, 254 nm) versus molar amount of 43 was plotted.

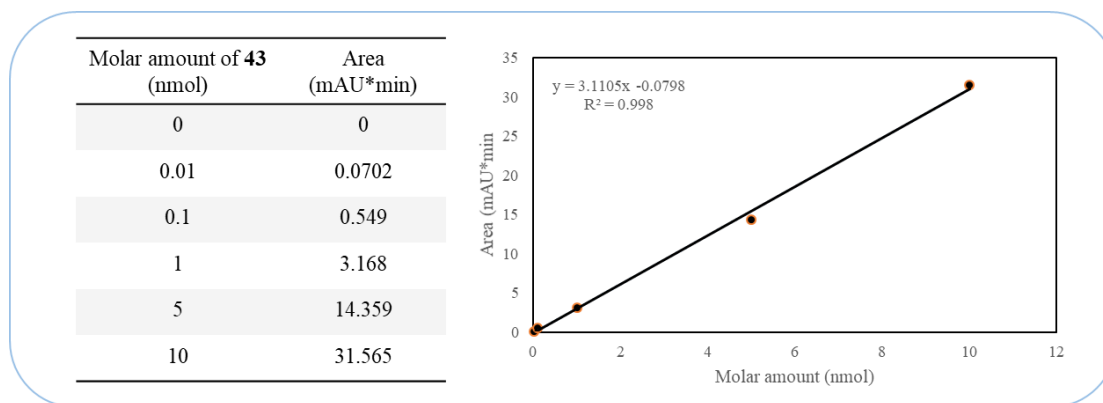

Standard curve equation:  $y = 3.1105x - 0.0798$

**Fig. S36:** Standard curve acquired with **43** at 254 nm

**Table S19:** Molar activity calculation of [<sup>18</sup>F]**43**

| Measurement | Activity injected<br>(MBq, d.c.) | Peak area<br>(mAU*min) | Molar amount<br>( $\mu\text{mol}$ ) | $A_m$<br>(GBq/ $\mu\text{mol}$ ) |
|-------------|----------------------------------|------------------------|-------------------------------------|----------------------------------|
| 1           | 2.98                             | 0.0982                 | $5.72 \times 10^{-5}$               | 52.1                             |
| 2           | 7.322                            | 0.2550                 | $10.76 \times 10^{-5}$              | 68                               |

The isolated [<sup>18</sup>F]**37** has an average  $A_m$  of  $60 \pm 11$  GBq/ $\mu\text{mol}$  ( $n = 2$ ).

### Molar activity calculation of [<sup>18</sup>F]**45**

The standard curve (**Fig. S37**) of HPLC peak area (UV, 254 nm) versus molar amount of **45** was plotted.

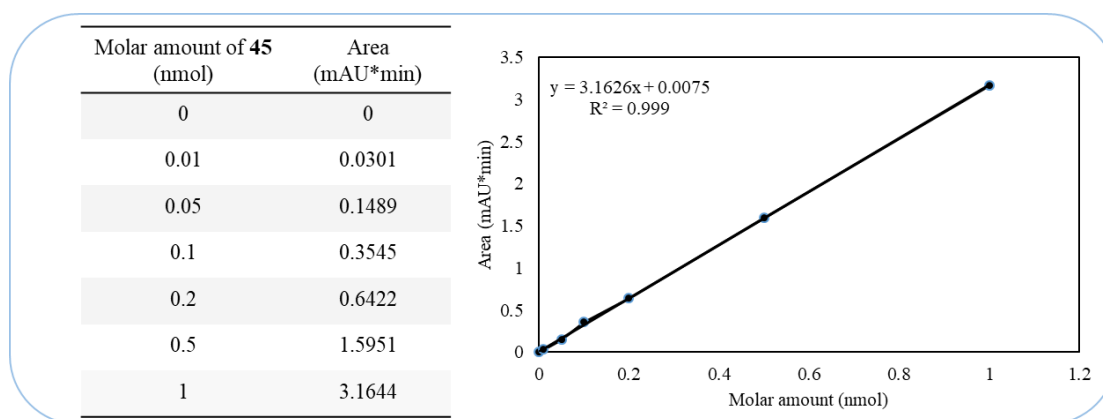

Standard curve equation:  $y = 3.1626x + 0.0075$

**Fig. S37:** Standard curve acquired with **45** at 254 nm

**Table S20:** Molar activity calculation of [<sup>18</sup>F]45

| Measurement | Activity injected<br>(MBq, d.c.) | Peak area<br>(mAU*min) | Molar amount<br>(μmol)   | A <sub>m</sub><br>(GBq/μmol) |
|-------------|----------------------------------|------------------------|--------------------------|------------------------------|
| 1           | 2.891                            | 0.0863                 | 2.492 × 10 <sup>-5</sup> | 116                          |

The isolated [<sup>18</sup>F]45 has an average A<sub>m</sub> of 116 GBq/μmol.

## 2.5 From Stability to Interaction

### 2.5.1 Stability evaluation

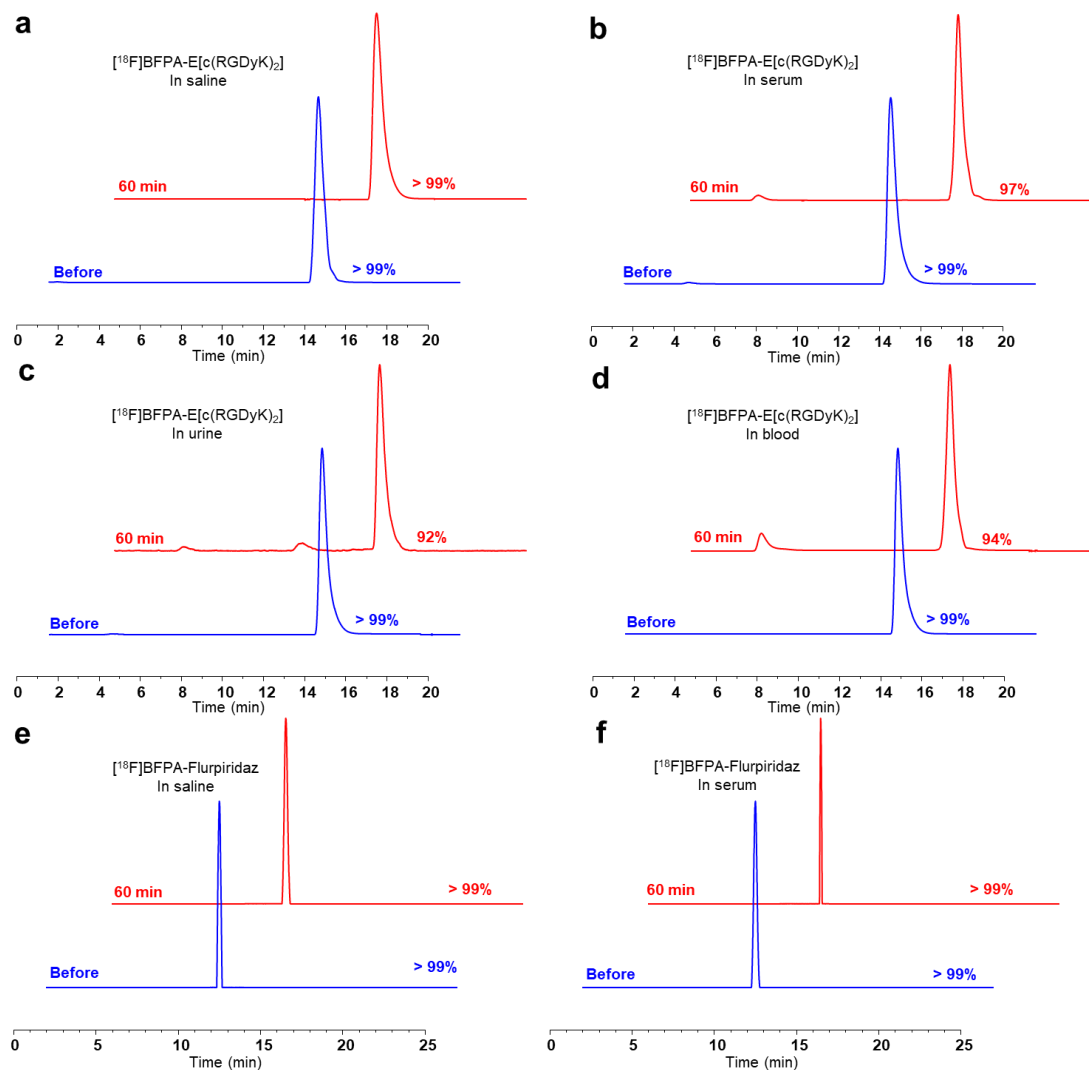

**Fig. S38:** Stability of radiotracer in *vivo* and *vitro* for 60 min. (a, b) Radio-HPLC analysis

demonstrated that the stability of [ $^{18}\text{F}$ ]BFPA-E[c(RGDyK)]<sub>2</sub> in saline > 99% and serum > 97% *in vitro*. 1# HPLC conditions: NanoChrom C18 column (5  $\mu\text{m}$ , 4.6  $\times$  250 mm), gradient elution, from 10% of CH<sub>3</sub>CN and 90% of water containing 0.1%TFA to 50% of CH<sub>3</sub>CN and 55% of water containing 0.1%TFA, and the flow rate was 1 mL/min for 20 min. (c, d) Radio-HPLC analysis demonstrated that [ $^{18}\text{F}$ ]BFPA-E[c(RGDyK)]<sub>2</sub> remains stable at over 92% in urine and over 94% in blood *in vivo*. (e, f) Radio-HPLC analysis also confirmed that [ $^{18}\text{F}$ ]BFPA-Flurpiridaz exhibited stability of over 99% in both saline and serum *in vitro*. HPLC conditions were consistent with Fig. S27.

### 2.5.2 IC<sub>50</sub> determination *via* cell competitive binding assay

The IC<sub>50</sub> value for [ $^{18}\text{F}$ ]BFPA-Flurpiridaz was found to be 148.0 nM, which is significantly lower than the IC<sub>50</sub> of 248.2 nM for the parent compound Flurpiridaz. This suggests that the modified with fluorophosphine moiety tracer exhibits enhanced binding affinity.

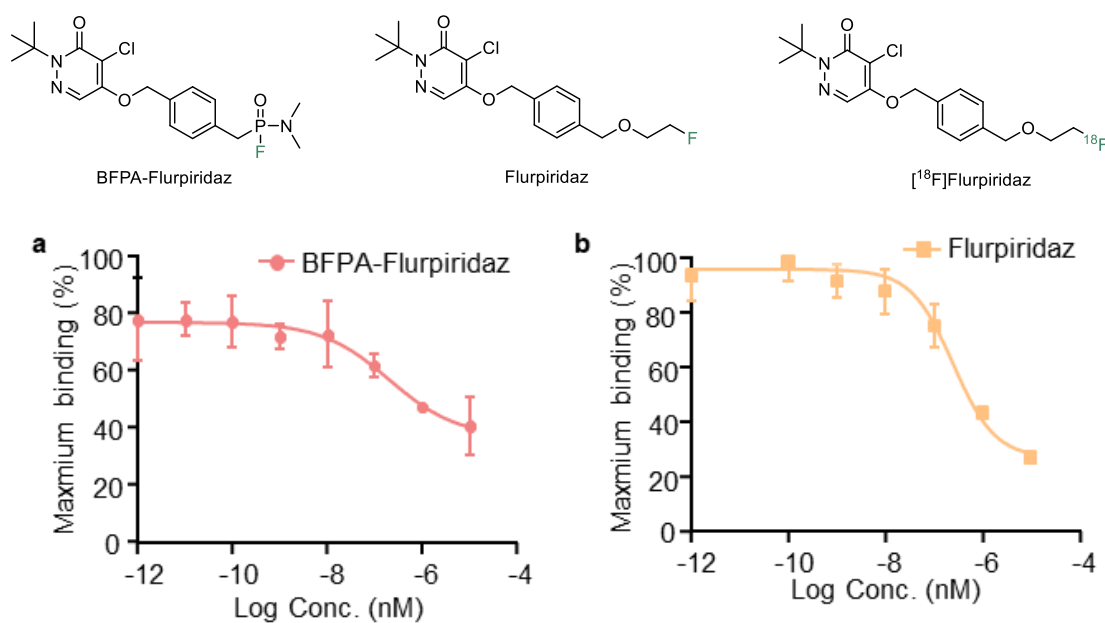

**Fig. S39:** IC<sub>50</sub> curves of BFPA-Flurpiridaz (a) and Flurpiridaz (b) inhibiting [ $^{18}\text{F}$ ]Flurpiridaz.

### 2.5.3 Molecular Docking

The docking results revealed that the binding modes of the parent drug and the BFPA-modified derivative were nearly identical, indicating that the modification did not impair the drug's binding affinity or interaction with the protein. Notably, in certain cases, the BFPA-modified derivatives were able to form an additional hydrogen bond (the additional hydrogen bond donor is from the P=O), which may enhance the overall binding interaction with the target protein.<sup>13-15</sup>

#### a. Docking Flutemetamo and **40** to A $\beta$ . (PDB: 2LMO)

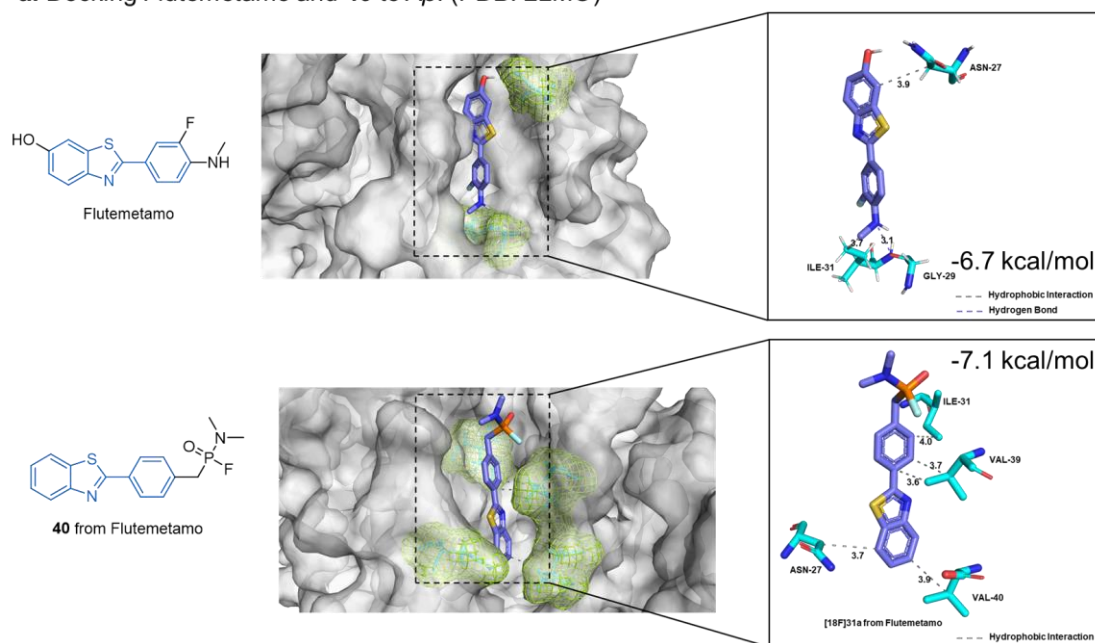

#### b. Docking Fluspidine and **41** to $\sigma$ 1. (PDB: 5HK1)

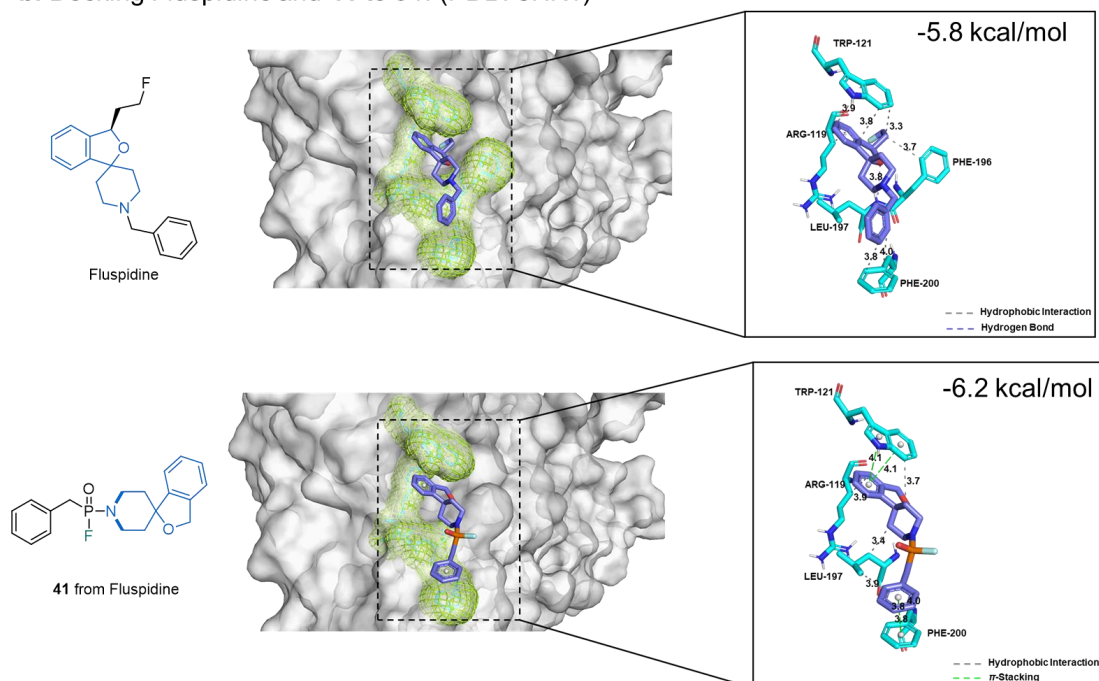

c. Docking Donepezil and **43** to AChE. (PDB: 1EVE)

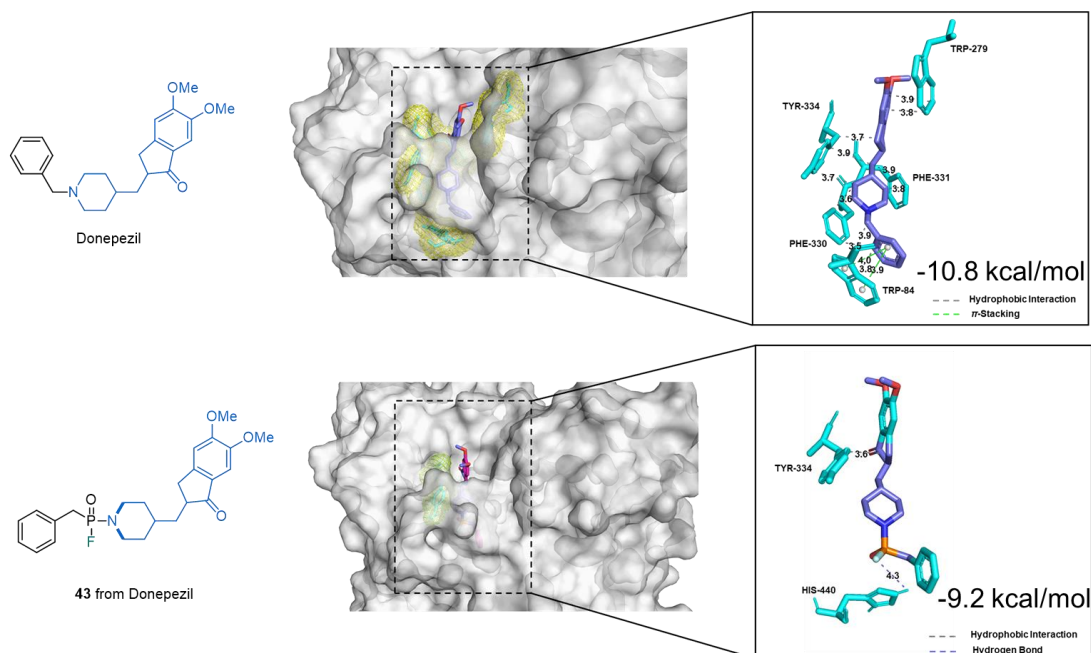

d. Docking Vortioxetine and **44** to SERT. (PDB: 6ZDV)

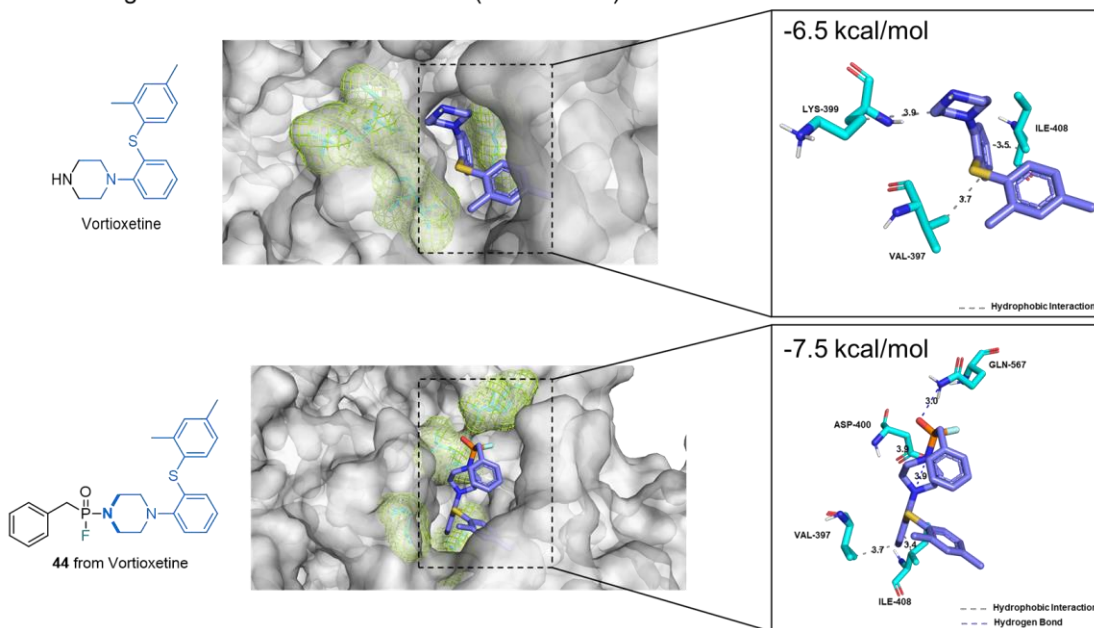

e. Docking Flurpiridaz and BFPA-Flurpiridaz to MC I . (PDB: 7ZM8)

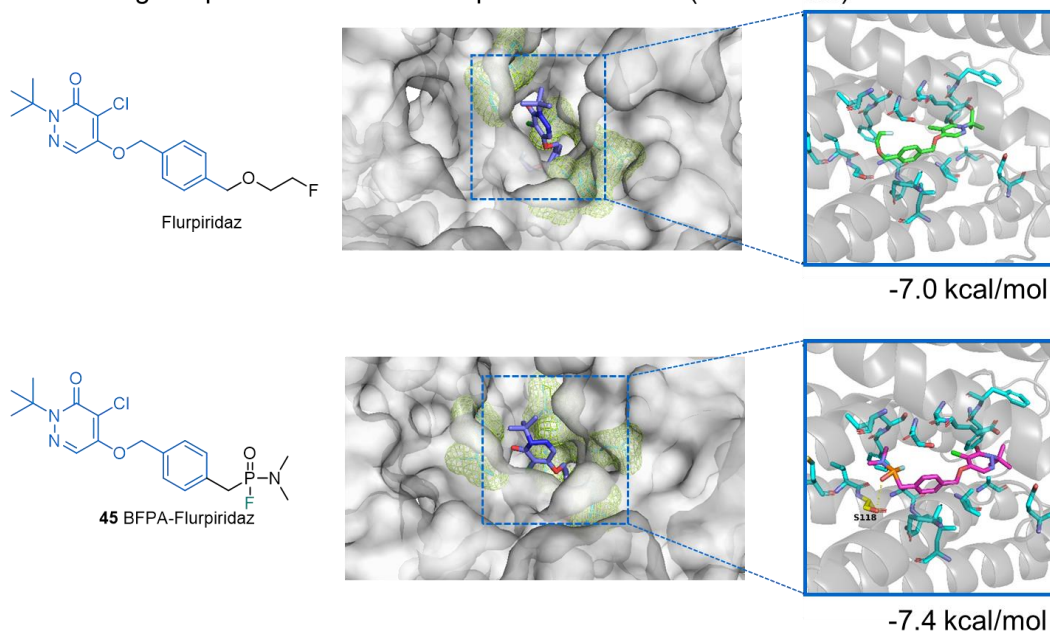

f. Docking E[c(RGDyK)]<sub>2</sub> and BFPA-E[c(RGDyK)]<sub>2</sub> to α<sub>v</sub>β<sub>3</sub>. (PDB: 4G1E)

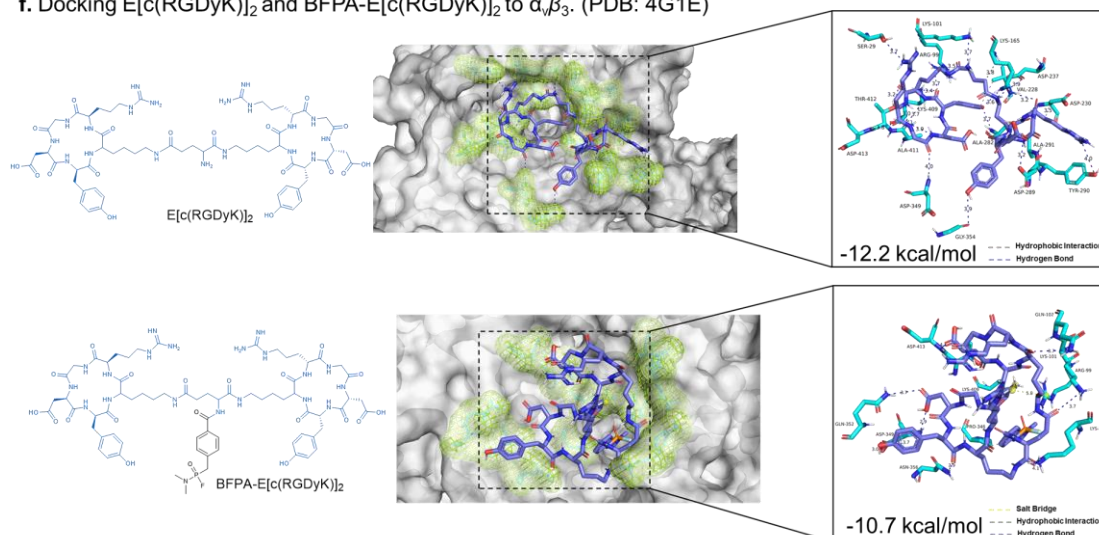

**Fig. S40:** Ligand–protein docking. All protein structures are sourced from the Protein Data Bank (PDB, <http://www.rcsb.org/>).

**Table S21:** Physicochemical Properties Analysis: cLog *P* and Log *D*

| Log <i>D</i> <sub>7.4</sub> of original molecule                                                                                        | Trend                                                                               | Log <i>D</i> <sub>7.4</sub> of BFPA-modified                                                                                                                         |
|-----------------------------------------------------------------------------------------------------------------------------------------|-------------------------------------------------------------------------------------|----------------------------------------------------------------------------------------------------------------------------------------------------------------------|
| 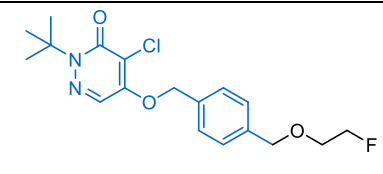<br>Flurpiridaz<br>Log <i>P</i> = 2.73 <sup>16</sup> |  | <br>[18F]BFPA-Flurpiridaz ([18F]45)<br>Log <i>D</i> <sub>7.4</sub> = 2.06 ± 0.01 |

|                                                                                                                                                                                    |                                                                                     |                                                                                                                                                                                                                        |
|------------------------------------------------------------------------------------------------------------------------------------------------------------------------------------|-------------------------------------------------------------------------------------|------------------------------------------------------------------------------------------------------------------------------------------------------------------------------------------------------------------------|
| 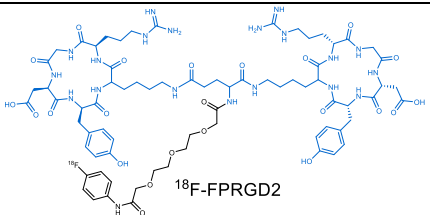 <p><math>^{18}\text{F}</math>-FPRGD2</p> <p><math>\text{Log } P = -2.28 \pm 0.05^{17}</math></p> |    |  <p><math>[^{18}\text{F}]\text{BFPA-E}[\text{c}(\text{RGDyK})]_2</math></p> <p><math>\text{Log } D_{7.4} = -2.05 \pm 0.04</math></p> |
| <b>cLog <math>P</math> of original molecule</b>                                                                                                                                    | <b>Trend</b>                                                                        | <b>cLog <math>P</math> of BFPA-modified</b>                                                                                                                                                                            |
|  <p>Flutemetamo</p> <p><math>\text{cLog } P = 4.16</math></p>                                     |    |  <p><math>[^{18}\text{F}]\mathbf{40}</math> from Flutemetamo</p> <p><math>\text{cLog } P = 3.09</math></p>                           |
|  <p>Fluspidine</p> <p><math>\text{cLog } P = 4.08</math></p>                                      |    |  <p><math>[^{18}\text{F}]\mathbf{41}</math> from Fluspidine</p> <p><math>\text{cLog } P = 2.89</math></p>                            |
|  <p>Cyclophosphamide</p> <p><math>\text{cLog } P = 0.76</math></p>                              |  |  <p><math>[^{18}\text{F}]\mathbf{42}</math> from cyclophosphamide</p> <p><math>\text{cLog } P = 2.64</math></p>                    |
|  <p>Donepezil</p> <p><math>\text{cLog } P = 4.14</math></p>                                     |  |  <p><math>[^{18}\text{F}]\mathbf{43}</math> from Donepezil</p> <p><math>\text{cLog } P = 3.93</math></p>                           |
|  <p>Vortioxetine</p> <p><math>\text{cLog } P = 4.51</math></p>                                  |  |  <p><math>[^{18}\text{F}]\mathbf{44}</math> from Vortioxetine</p> <p><math>\text{cLog } P = 5.40</math></p>                        |



## 2.6 Positron emission tomography imaging

**2.6.1 Animal models.** All animal procedures were conducted in accordance with the Guide for the Care and Use of Laboratory Animals and approved by the Animal Care and Use Committee of Xiamen University (240506 XMULAC20240099).

### 2.6.2 *In vivo* MicroPET imaging of [<sup>18</sup>F]BFPA-E[c(RGDyK)]<sub>2</sub> was conducted in U87MG glioma xenografts in male nude mice.

All MicroPET/CT images were acquired using an Inveon MicroPET/CT scanner (Siemens) and subsequently analyzed with the Inveon Research Workplace Software (Siemens).

For the MicroPET imaging study, an U87MG tumor-bearing male nude mice received a bolus tail-vein injection of a solution of [<sup>18</sup>F]BFPA-E[c(RGDyK)]<sub>2</sub> (~3.7 MBq) dissolved in 0.9% saline (100 μL). The mouse was anesthetized using inhaled 2% isoflurane 25 min after injection and then placed on the MicroPET/CT scanner bed. A 5 min PET scan was performed at 30 min after injection.

### 2.6.3 Blocking study

A male nude mice with an U87MG tumor was administered a bolus tail-vein injection of a solution containing [<sup>18</sup>F]BFPA-E[c(RGDyK)]<sub>2</sub> (~3.7 MBq) and E[c(RGDyK)]<sub>2</sub> (200 μg), dissolved in 0.9% saline (100 μL). The mice was anesthetized with 2% inhaled isoflurane 25 min after injection and then carefully positioned on the MicroPET/CT scanner bed. Subsequently, a 5 min MicroPET scan was performed at 30 min post-injection to assess the imaging results.

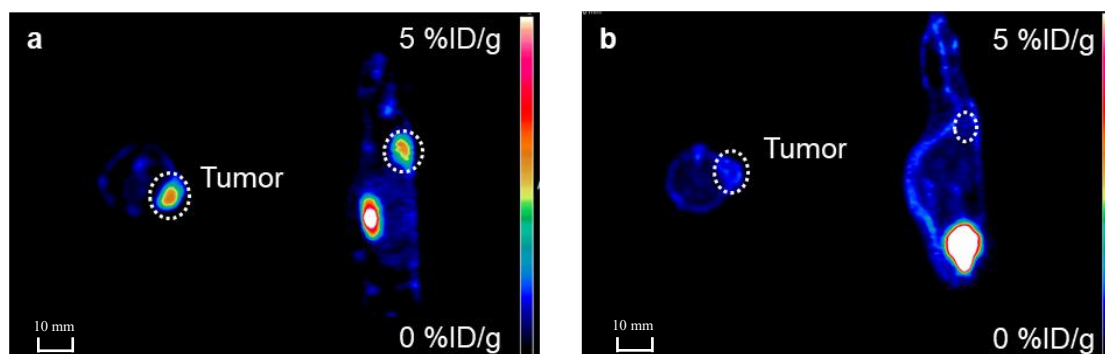

**Fig. S41:** **a** MicroPET images of [<sup>18</sup>F]BFPA-E[c(RGDyK)]<sub>2</sub> in U87MG xenograft mice at 30 min after tail vein injection. **b** MicroPET images of U87MG xenograft mice at 30 min after simultaneous injection of [<sup>18</sup>F]BFPA-E[c(RGDyK)]<sub>2</sub> and E[c(RGDyK)]<sub>2</sub> (200 μg).

## 2.7 Mechanism proposal and computational study

### 2.7.1 Research mechanisms: NMR and MS

The possible compounds in the reaction system were estimated by  $^1\text{H}$ NMR,  $^{19}\text{F}$  NMR and  $^{31}\text{P}$  NMR *in situ*.

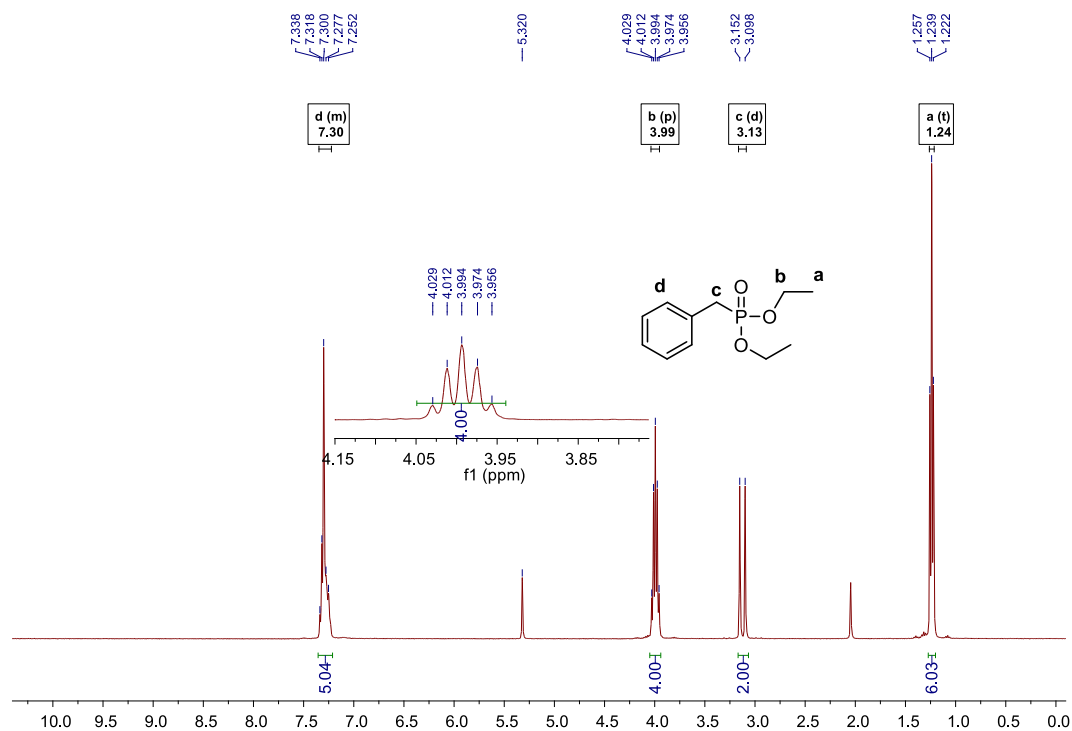

Fig. S42:  $^1\text{H}$  NMR of CCOP(=O)(OCC)c1ccccc1 in  $\text{CD}_2\text{Cl}_2$ , 400 MHz.

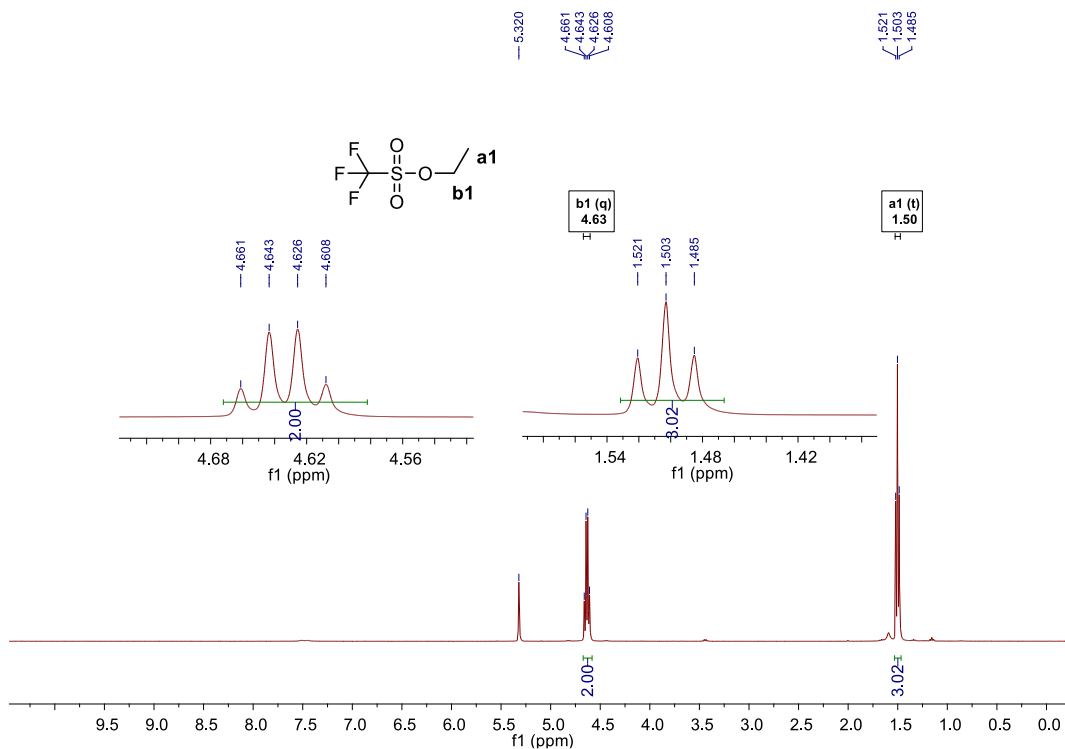

Fig. S43:  $^1\text{H}$  NMR of TfOEt in  $\text{CD}_2\text{Cl}_2$ , 400 MHz.

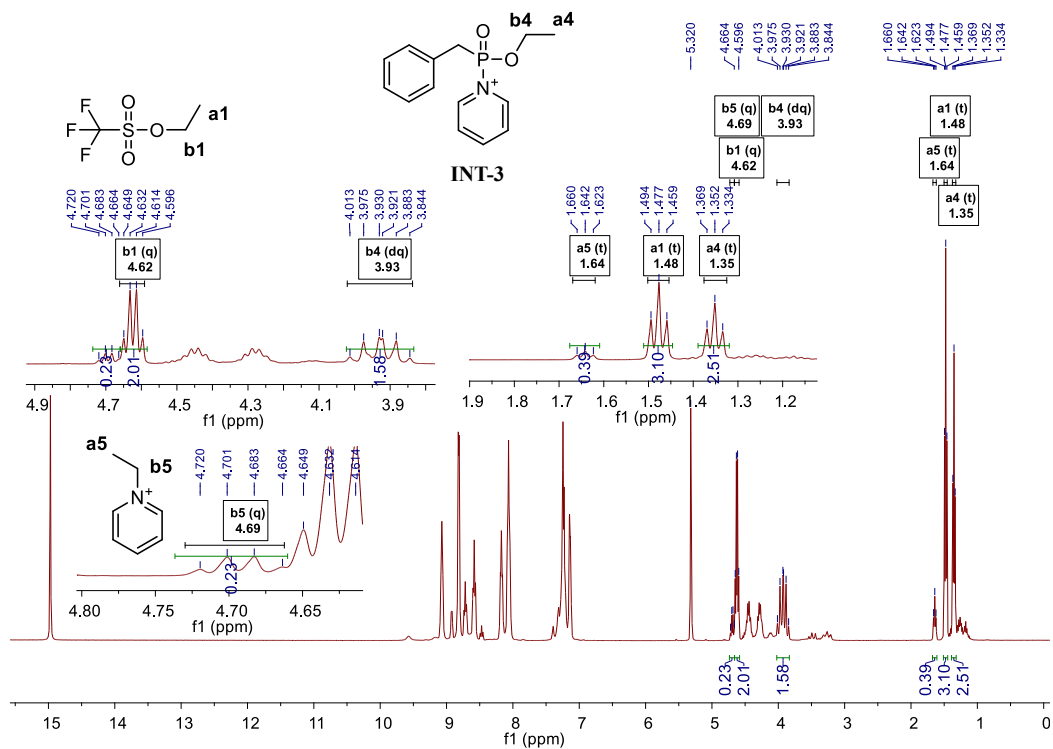

Fig. S44: Crude  $^1\text{H}$  NMR of CCOP(=O)(F)F + Tf\_2O + C1=CC=CC=C1N in  $\text{CD}_2\text{Cl}_2$ , 400 MHz.

In the reaction system, 1-ethylpyridin-1-ium detected may be the product of the reaction between pyridine and TfOEt.

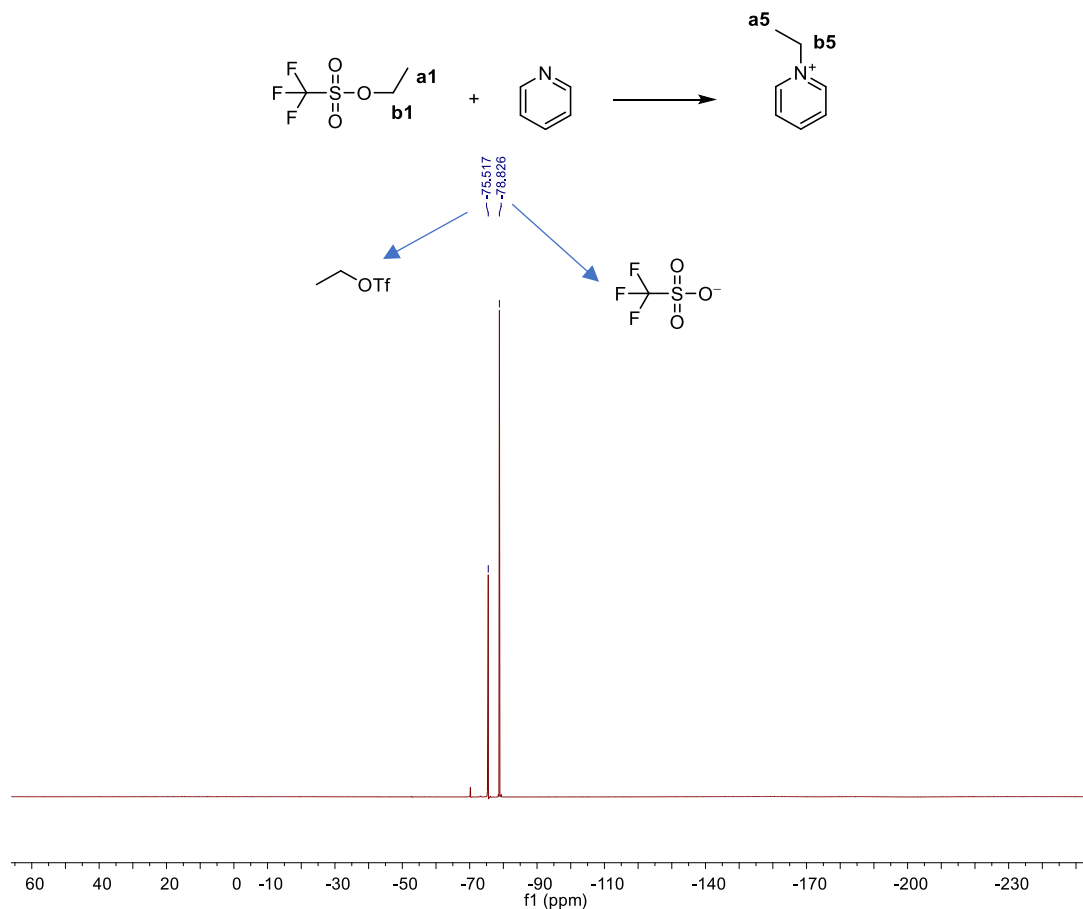

**Fig. S45:** Crude <sup>19</sup>F NMR of CCOP(=O)(OC)c1ccccc1 + Tf<sub>2</sub>O + C1=CC=NC=C1 in CD<sub>2</sub>Cl<sub>2</sub>, 162 MHz.

**INT-4:** MS (m/z) calculated for C<sub>18</sub>H<sub>19</sub>F<sub>3</sub>O<sub>4</sub>PS<sup>+</sup> [M+H]<sup>+</sup>: 419.0688; found: 419.05.

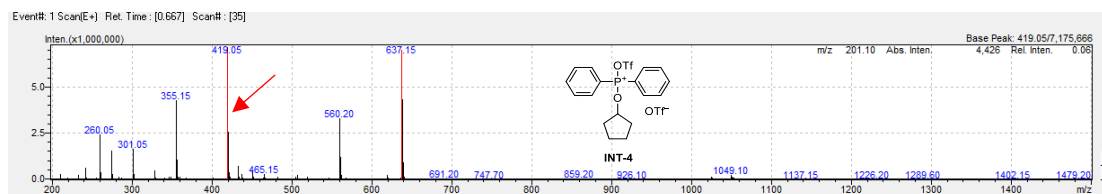

**INT-5:** MS (m/z) calculated for C<sub>23</sub>H<sub>24</sub>F<sub>3</sub>NO<sub>4</sub>PS<sup>+</sup> [M+H]<sup>+</sup>: 498.1110; found: 498.10.

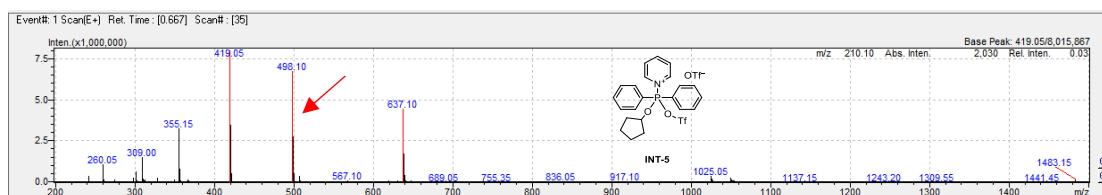

**Fig. S46:** MS determination of fluorination of compound **S8** *in situ*.

## 2.7.2 Reaction pathways and free-energy profiles

### Computational Details:

Calculations were carried out using the Gaussian 09 programme. Geometries were optimized using the M06 density functional method<sup>18</sup> and 6-31G\* basis set. Solvation effect was treated by the default PCM method<sup>19</sup>. Then, frequency analyses were performed at the same level of theory. Single-point energy calculations were performed using the 6-311++G\*\* basis set with the same density functional method and solvation model.

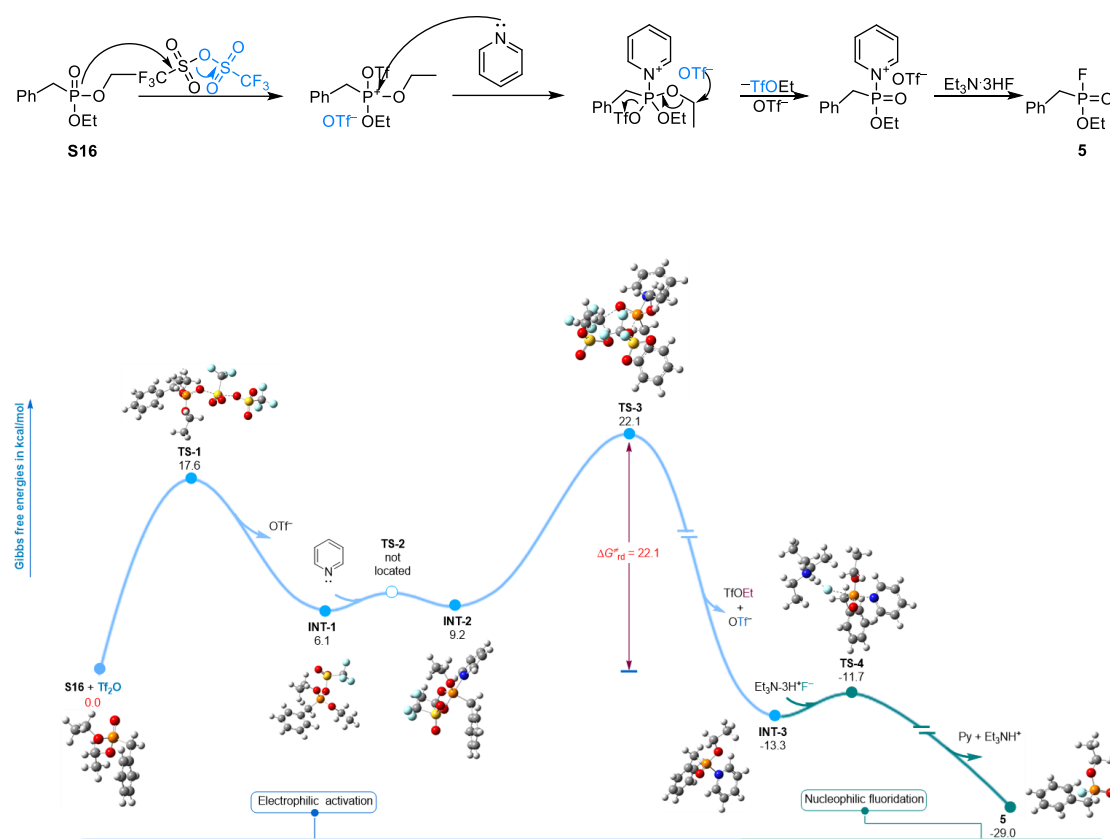

**Fig.. S47:** Using the Gaussian 09 program, DFT calculations at the m06+GD3/6-311++G\*\* level of theory were employed to predict activation energy barriers for the mechanistic proposal for fluorination of alkyl phosphonates, along with reaction pathways and free-energy profiles. Gaussview 5.0 is used for data analysis.

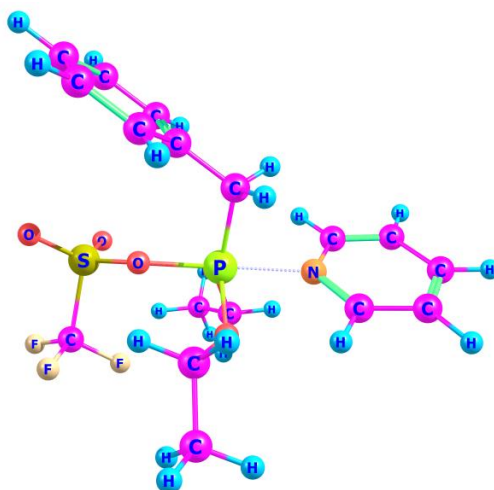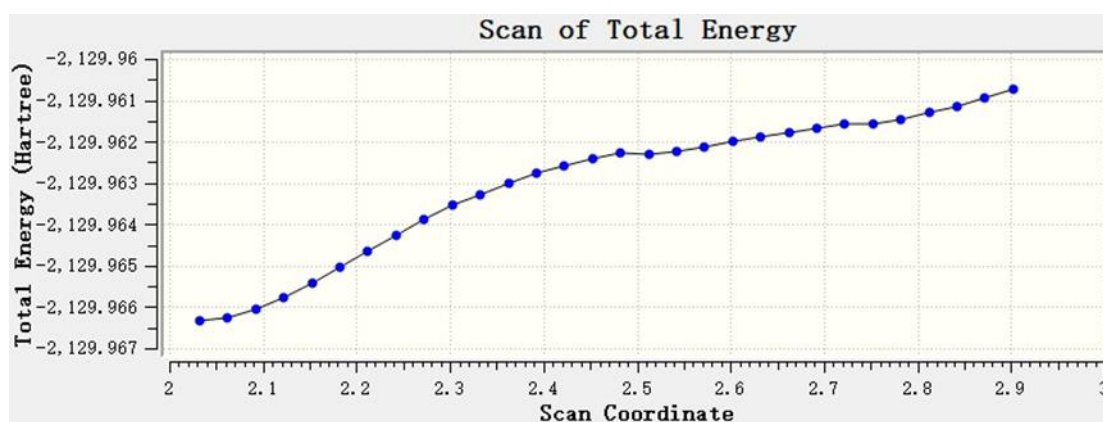

**Fig. S48:** Scan of total energy with respect to the P...N distance from 2.03 to 2.95 Å indicates that transition state between B and C may not exist.

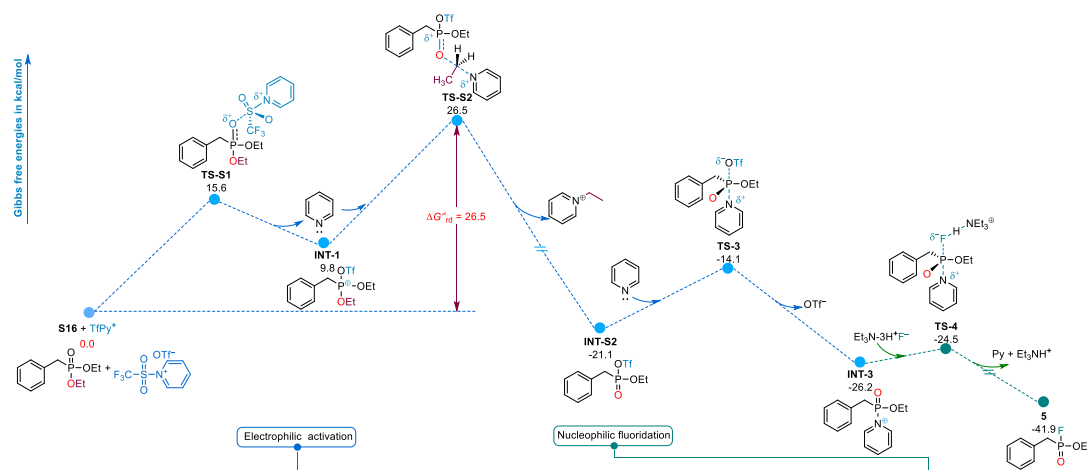

**Fig. S49:** The energy distribution of alkyl phosphonate (S16) activated by Tf<sub>2</sub>O for fluorination at a less likely alternative pathway.

### 3. Supplementary Figures

#### 3.1 Radio-TLC traces of RCCs

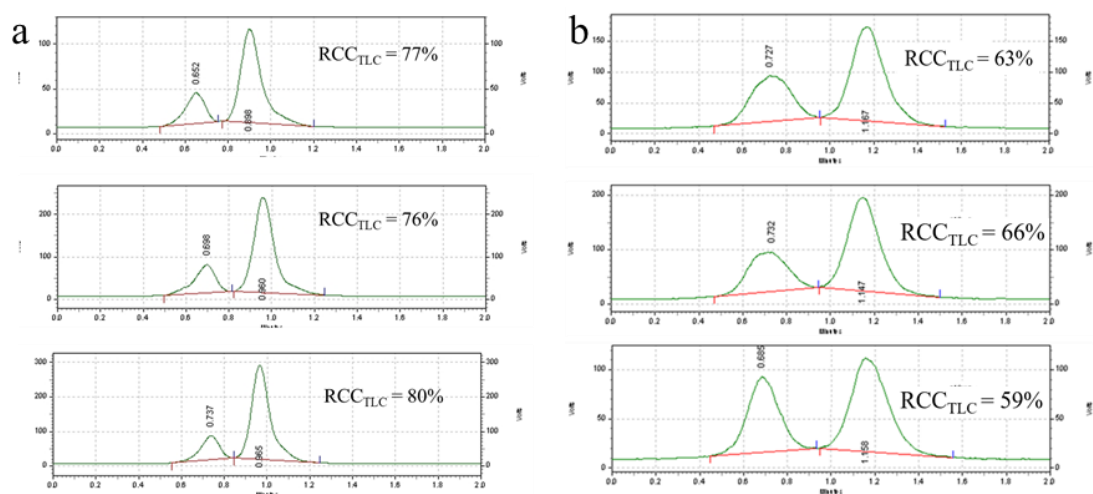

**Fig. A1:** Radio-TLC traces of (a)  $^{18}\text{F}$ -benzylphosphonofluoridic acid ( $\text{RCC} = 78 \pm 2\%$ ) and (b)  $^{18}\text{F}$ ]1 ( $\text{RCC} = 62 \pm 3\%$ ). Developing solvent: MeOH.

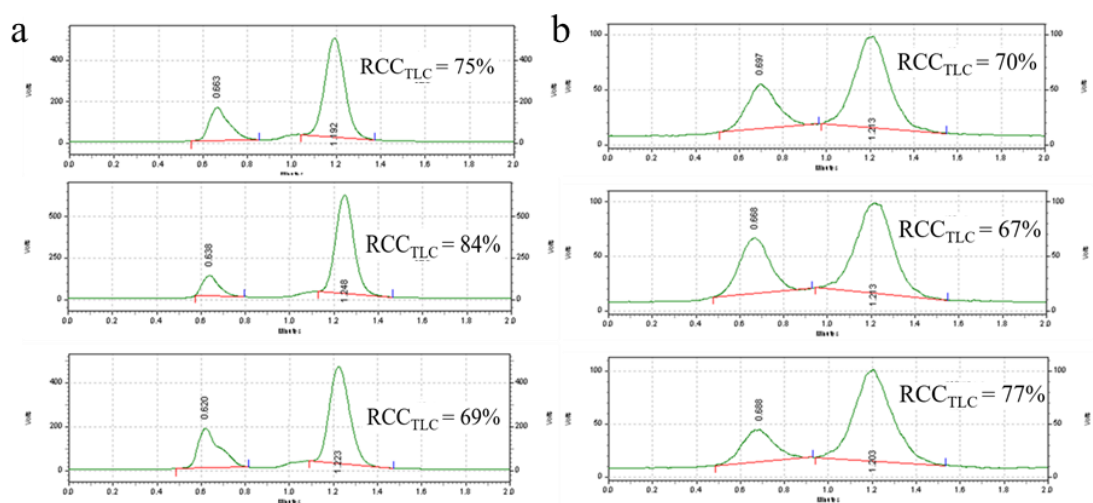

**Fig. A2:** Radio-TLC traces of (a)  $^{18}\text{F}$ ]36 ( $\text{RCC} = 76 \pm 7\%$ ) and (b)  $^{18}\text{F}$ ]37 ( $\text{RCC} = 71 \pm 5\%$ ). Developing solvent: MeOH.

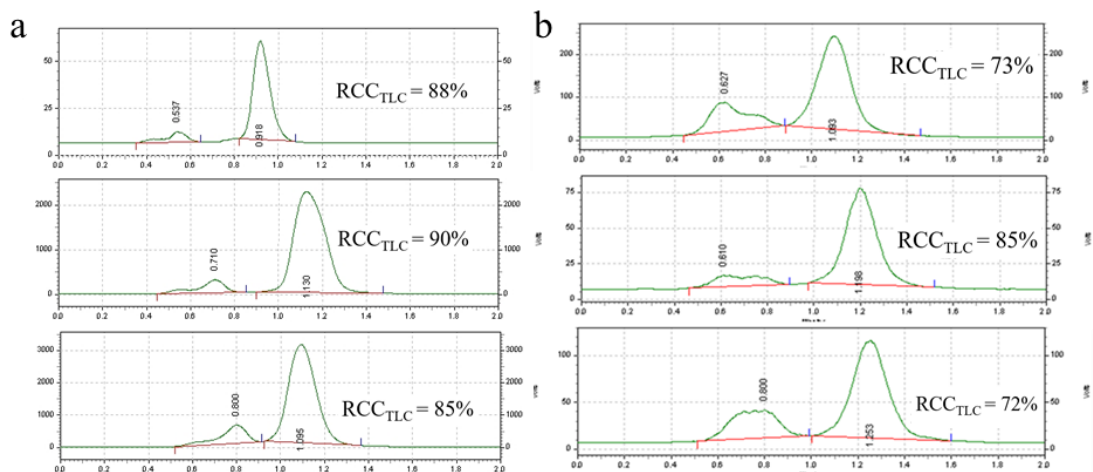

**Fig. A3:** Radio-TLC traces of (a)  $[^{18}\text{F}]\mathbf{38}$  ( $\text{RCC} = 88 \pm 3\%$ ) and (b)  $[^{18}\text{F}]\mathbf{39}$  ( $\text{RCC} = 77 \pm 7\%$ ). Developing solvent: MeOH.

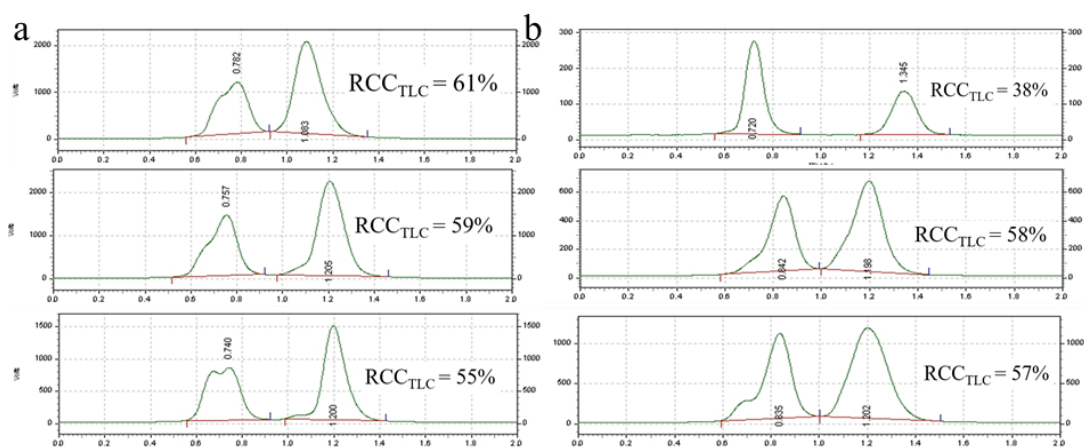

**Fig. A4:** Radio-TLC traces of (a)  $[^{18}\text{F}]\mathbf{40}$  ( $\text{RCC} = 58 \pm 3\%$ ) and (b)  $[^{18}\text{F}]\mathbf{41}$  ( $\text{RCC} = 51 \pm 11\%$ ). Developing solvent: MeOH.

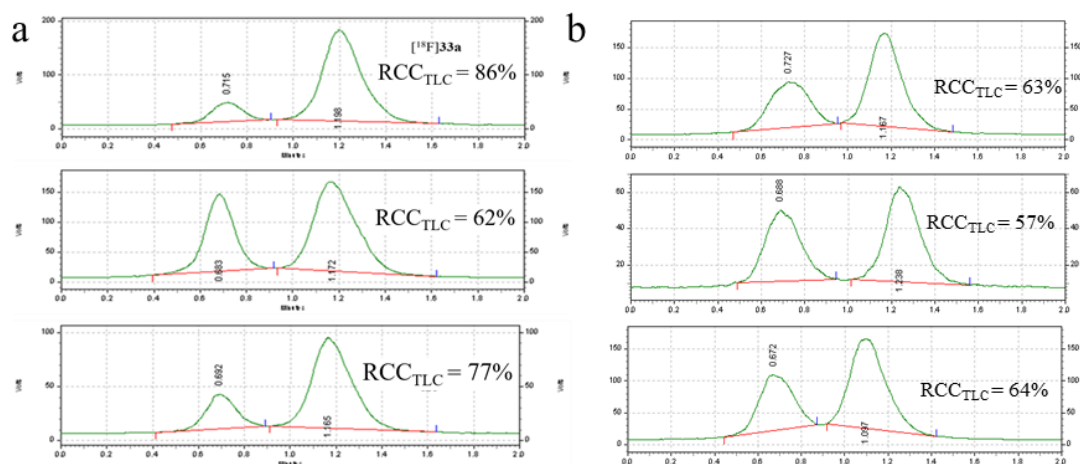

**Fig. A5:** Radio-TLC traces of (a)  $[^{18}\text{F}]\mathbf{42}$  ( $\text{RCC} = 75 \pm 12\%$ ) and (b)  $[^{18}\text{F}]\mathbf{43}$  ( $\text{RCC} = 61 \pm 4\%$ ). Developing solvent: MeOH.



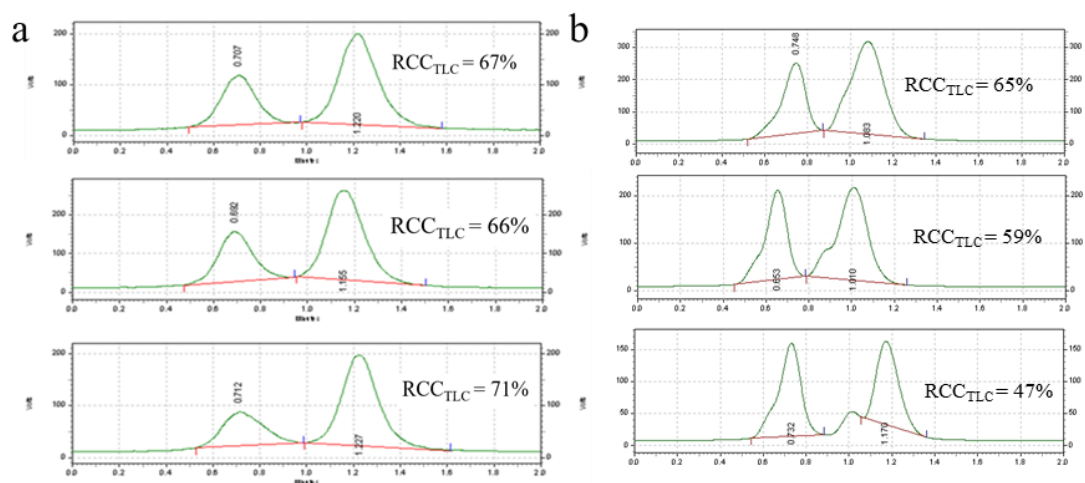

**Fig. A6:** Radio-TLC traces of (a)  $[^{18}\text{F}]\mathbf{44}$  ( $\text{RCC} = 68 \pm 2\%$ ) and (b)  $[^{18}\text{F}]\mathbf{45}$  ( $\text{RCC} = 57 \pm 9\%$ ). Developing solvent: MeOH.

### 3.2 NMR spectra ( $^1\text{H}$ NMR, $^{13}\text{C}$ NMR, $^{31}\text{P}$ NMR, $^{19}\text{F}$ NMR)

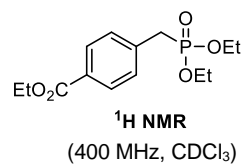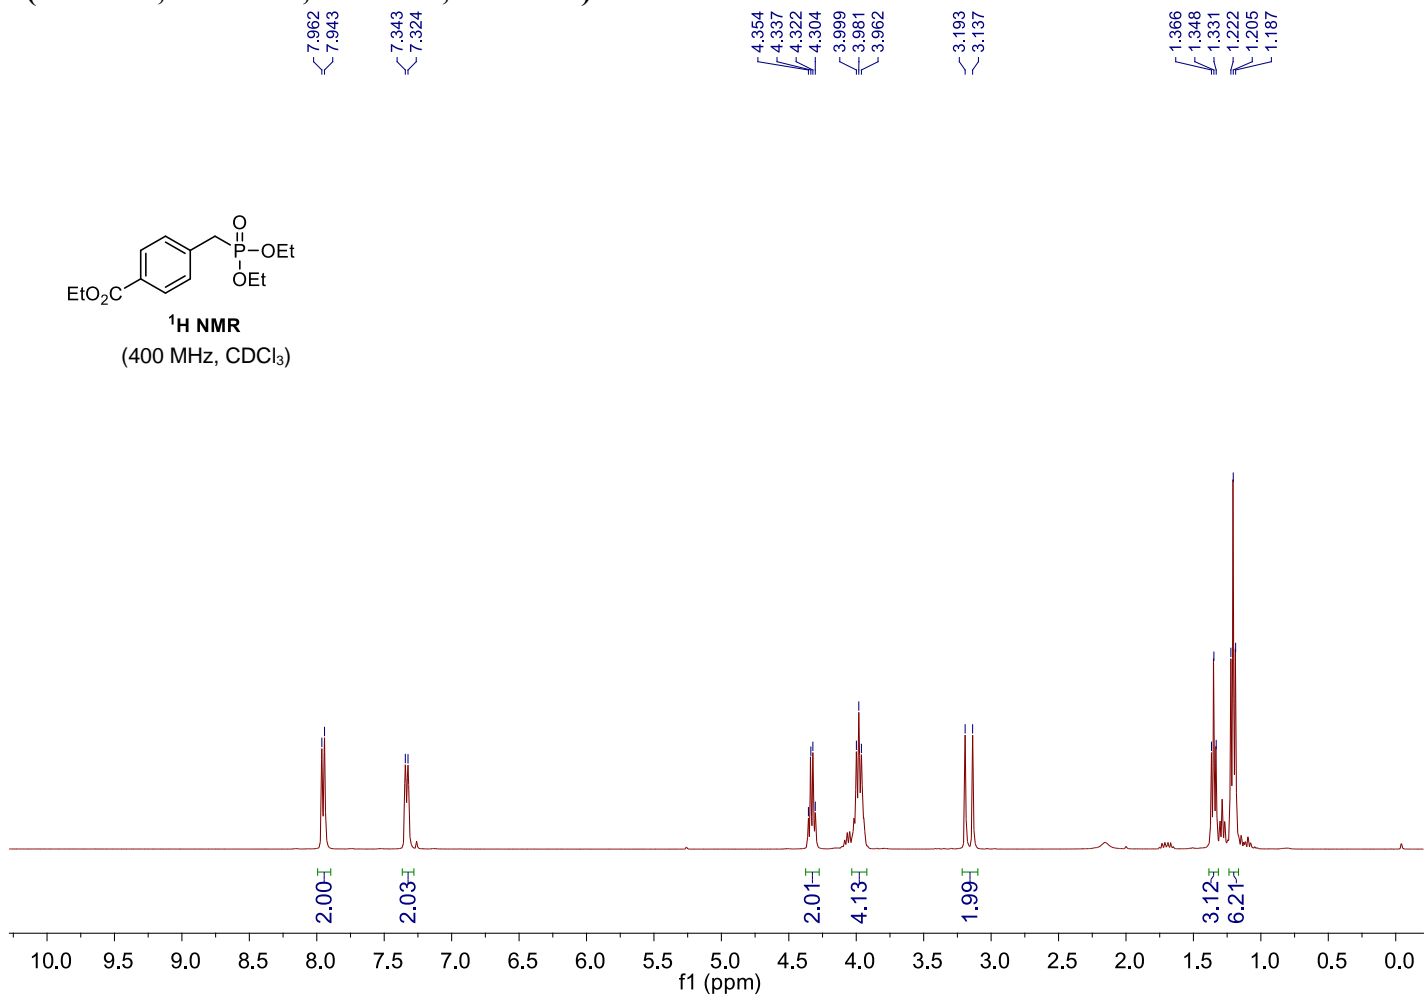

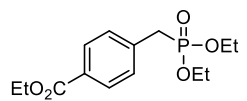

**<sup>13</sup>C NMR**  
(100 MHz, CDCl<sub>3</sub>)

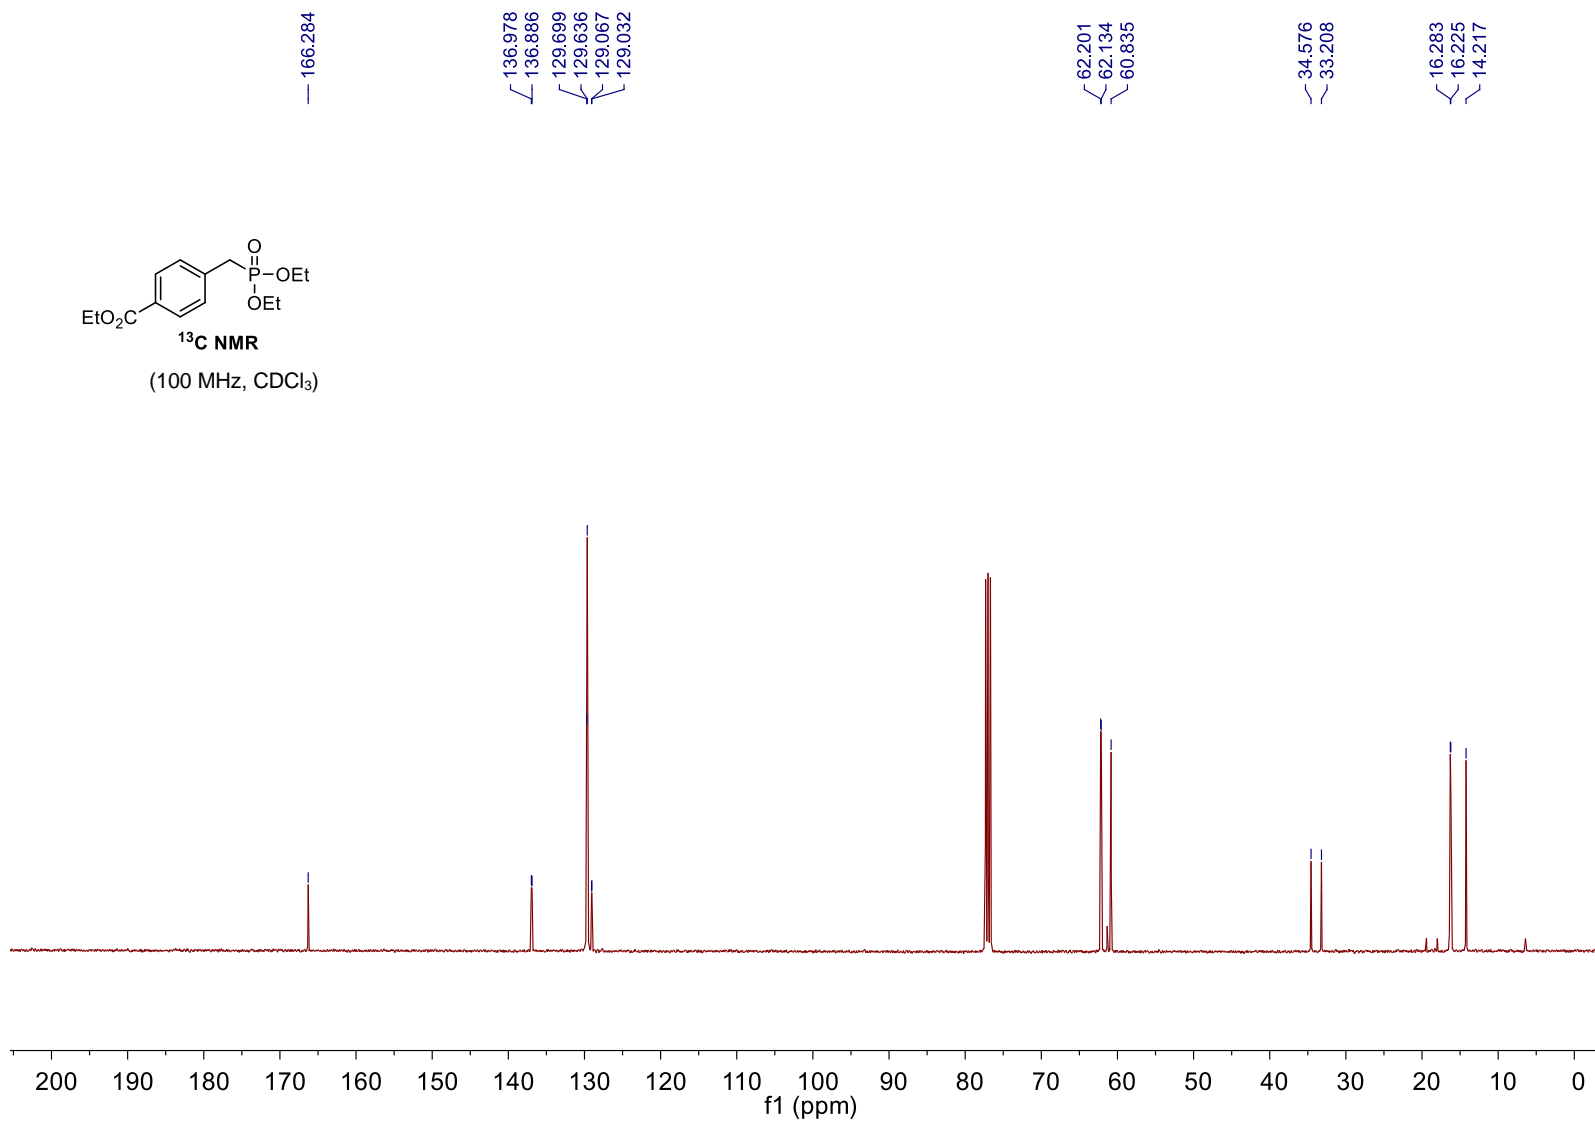

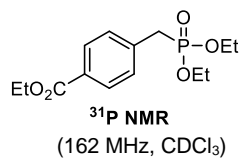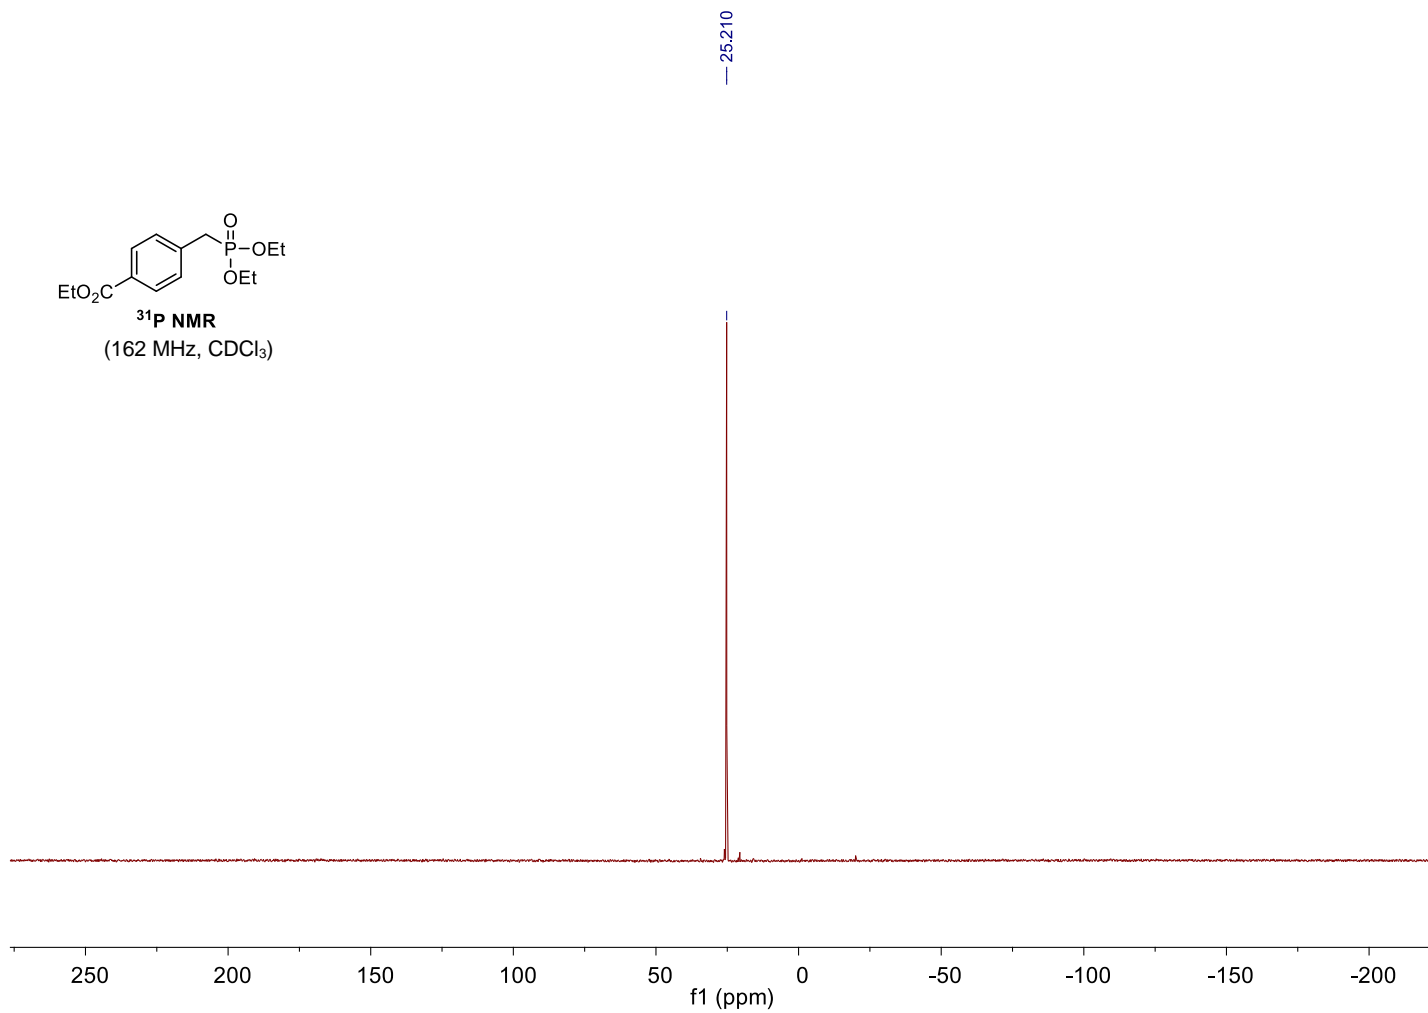

S108

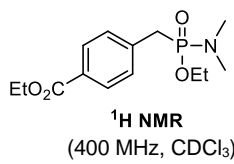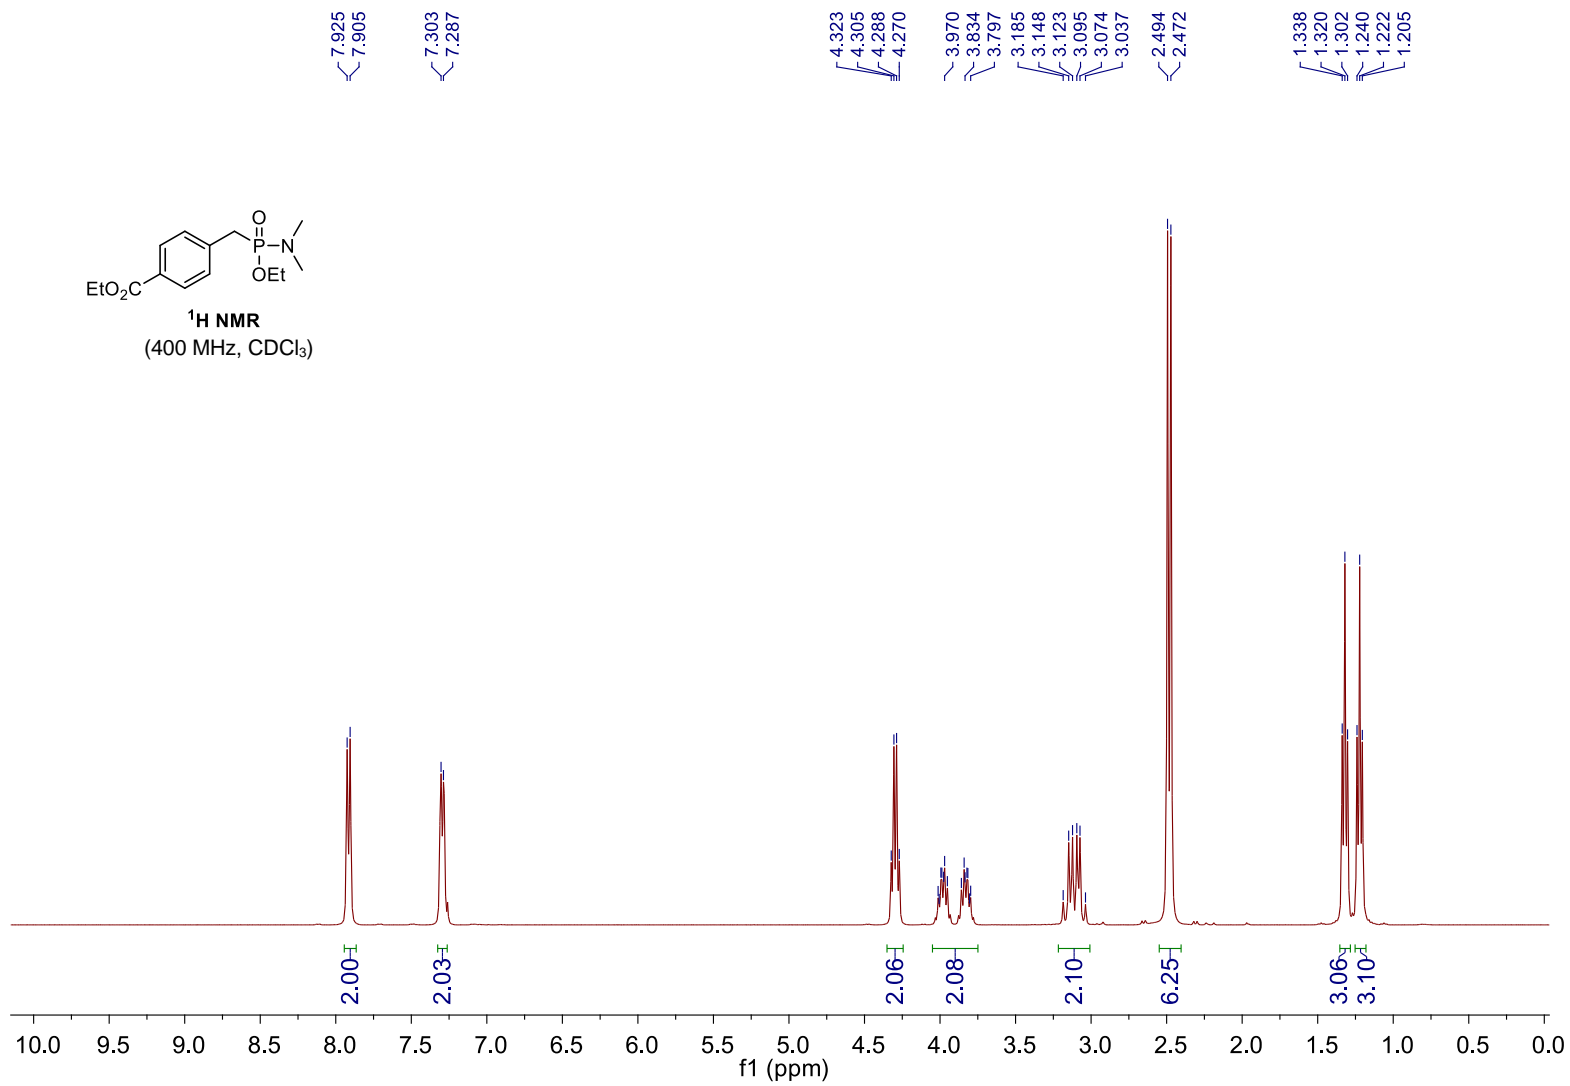

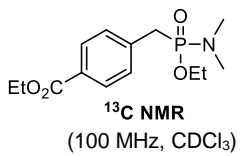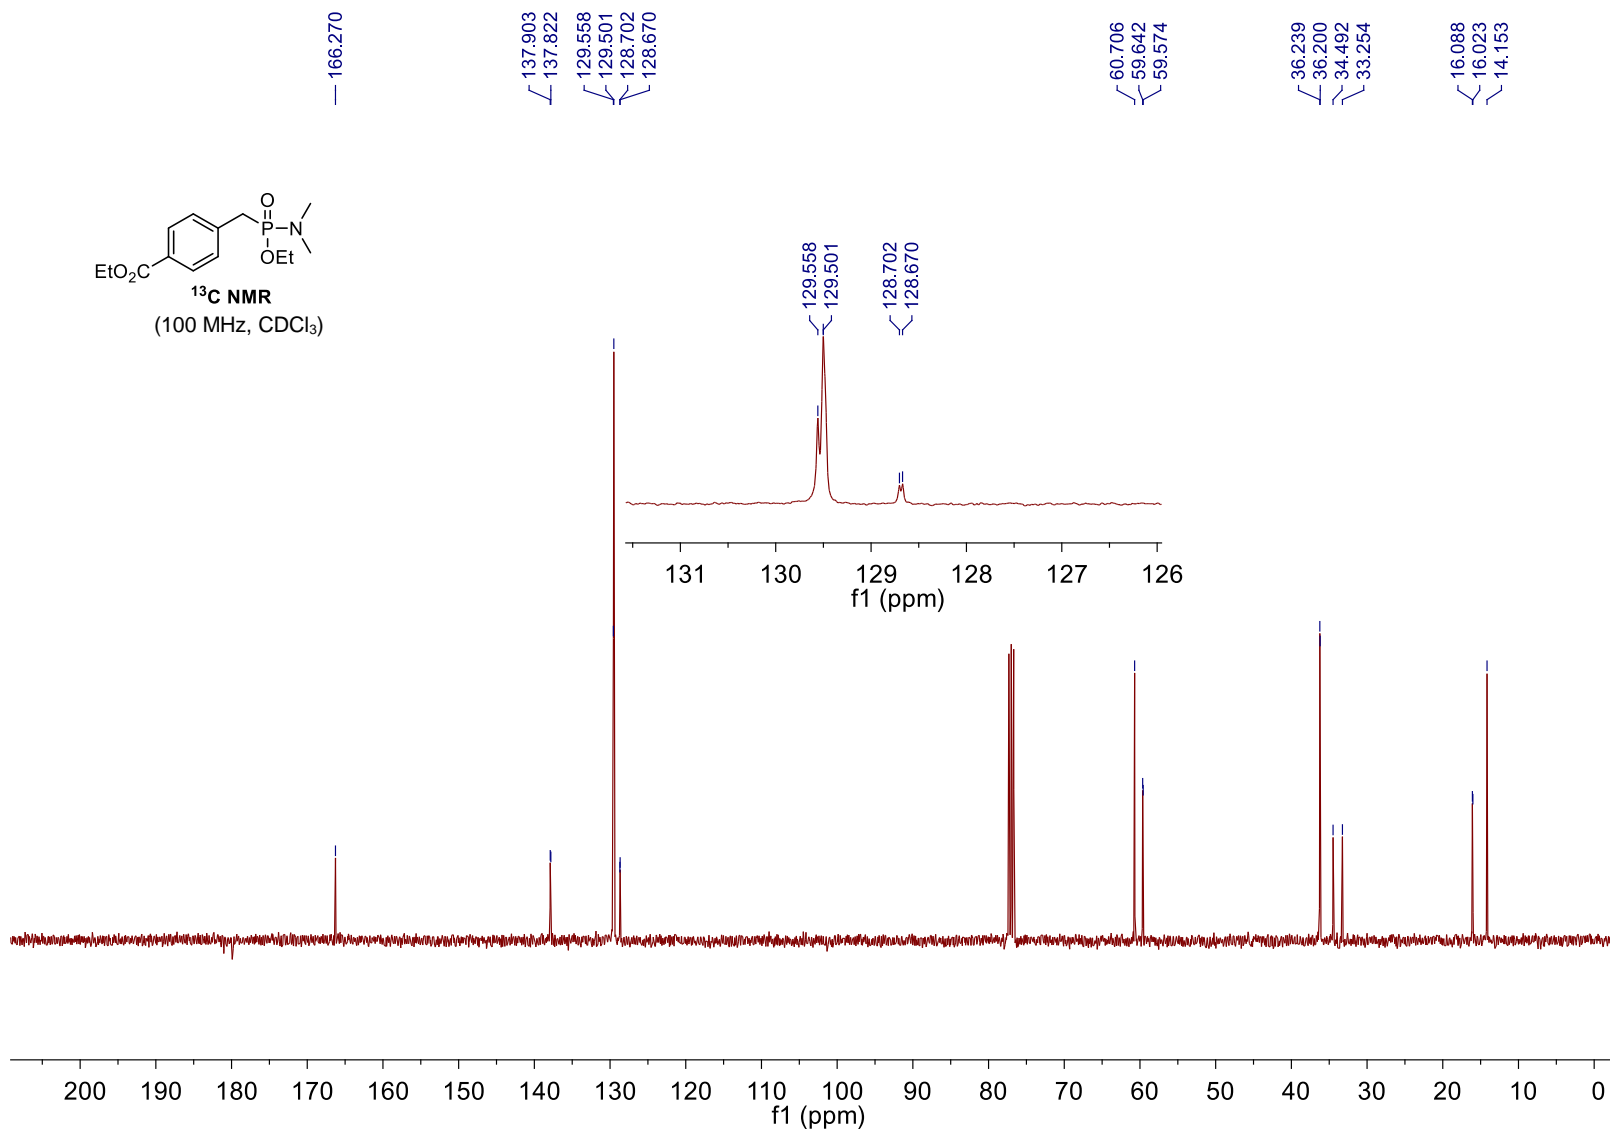

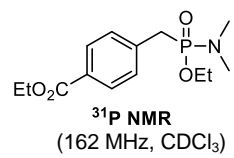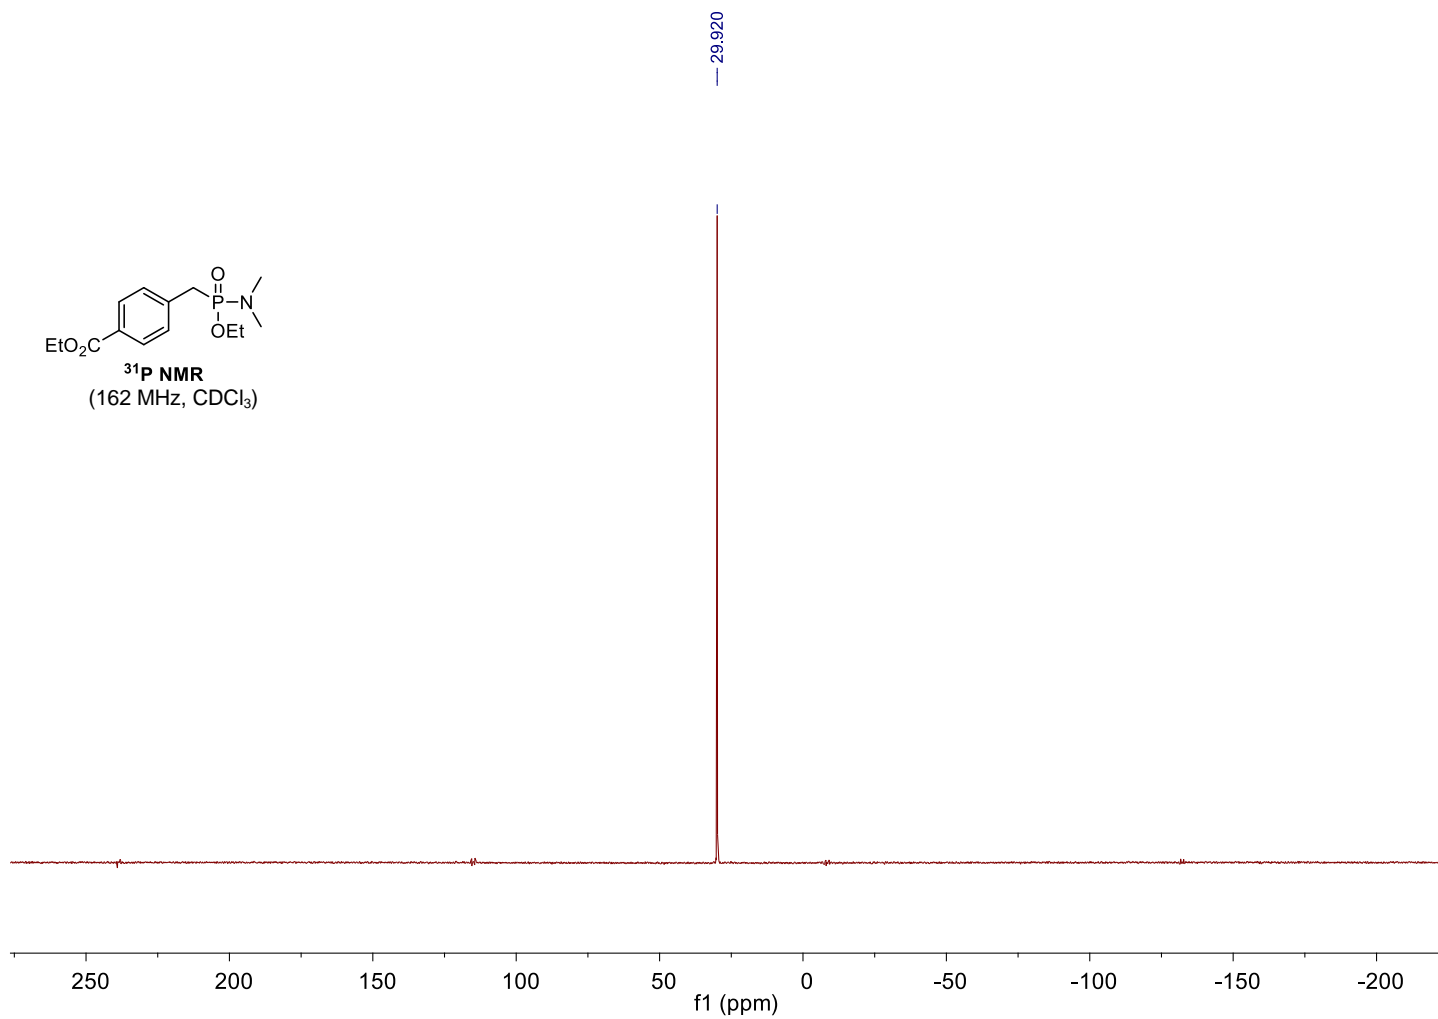

S111

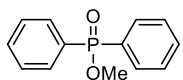

**<sup>1</sup>H NMR**  
(400 MHz, CDCl<sub>3</sub>)

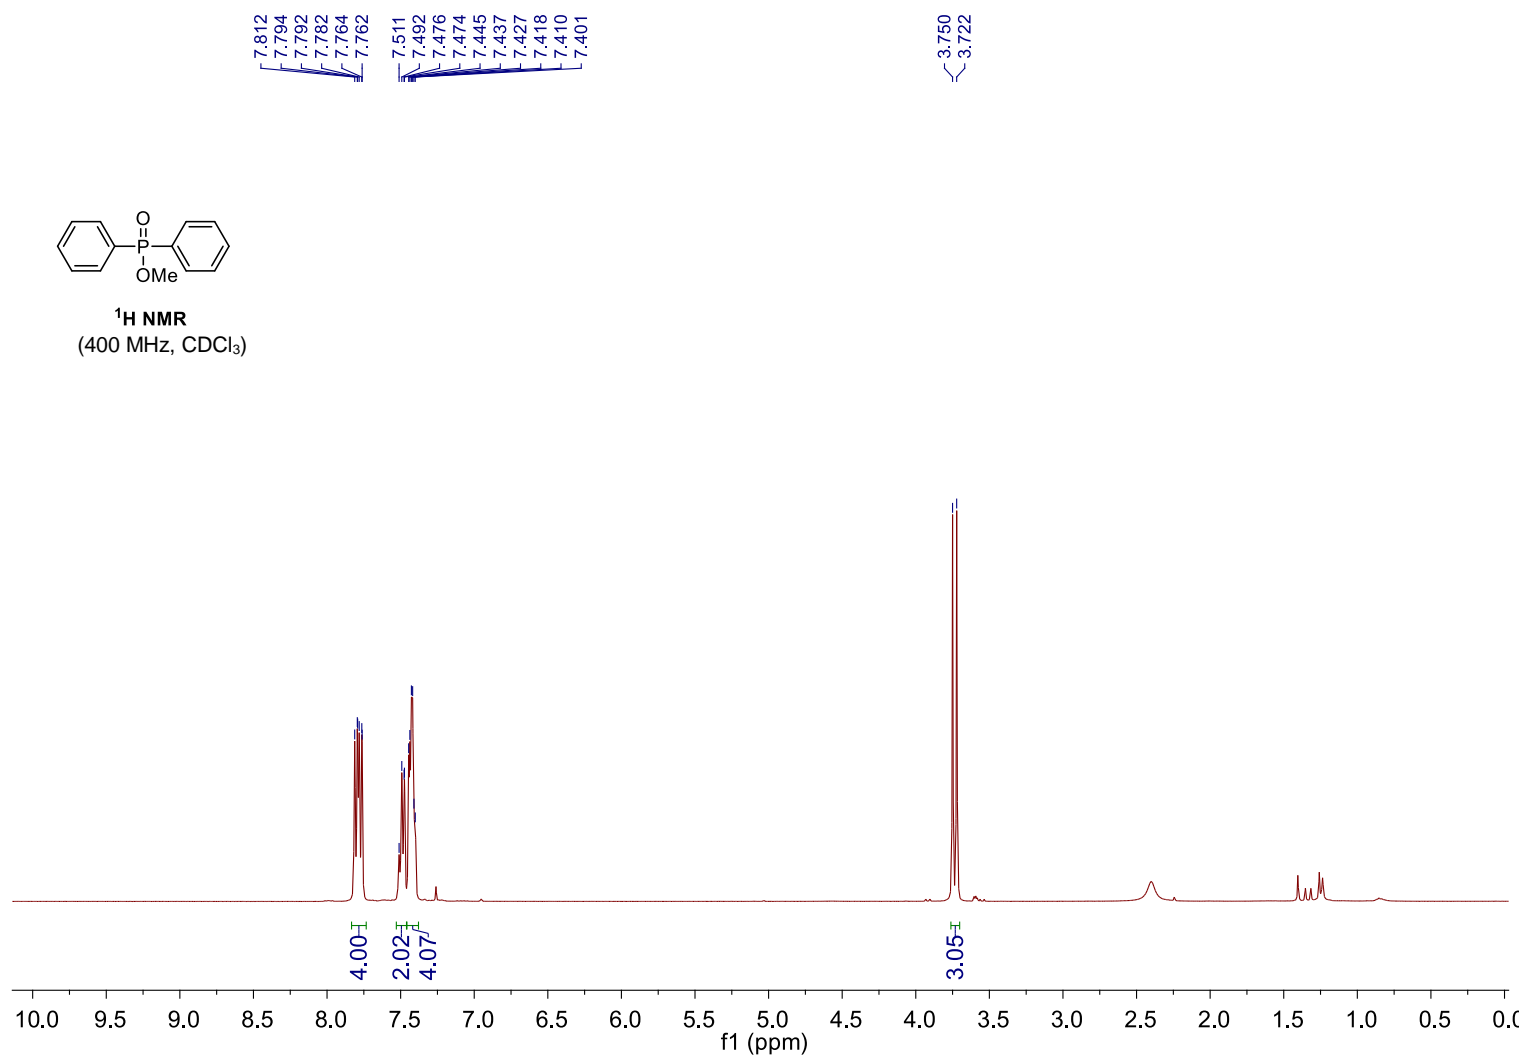



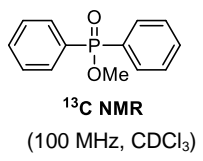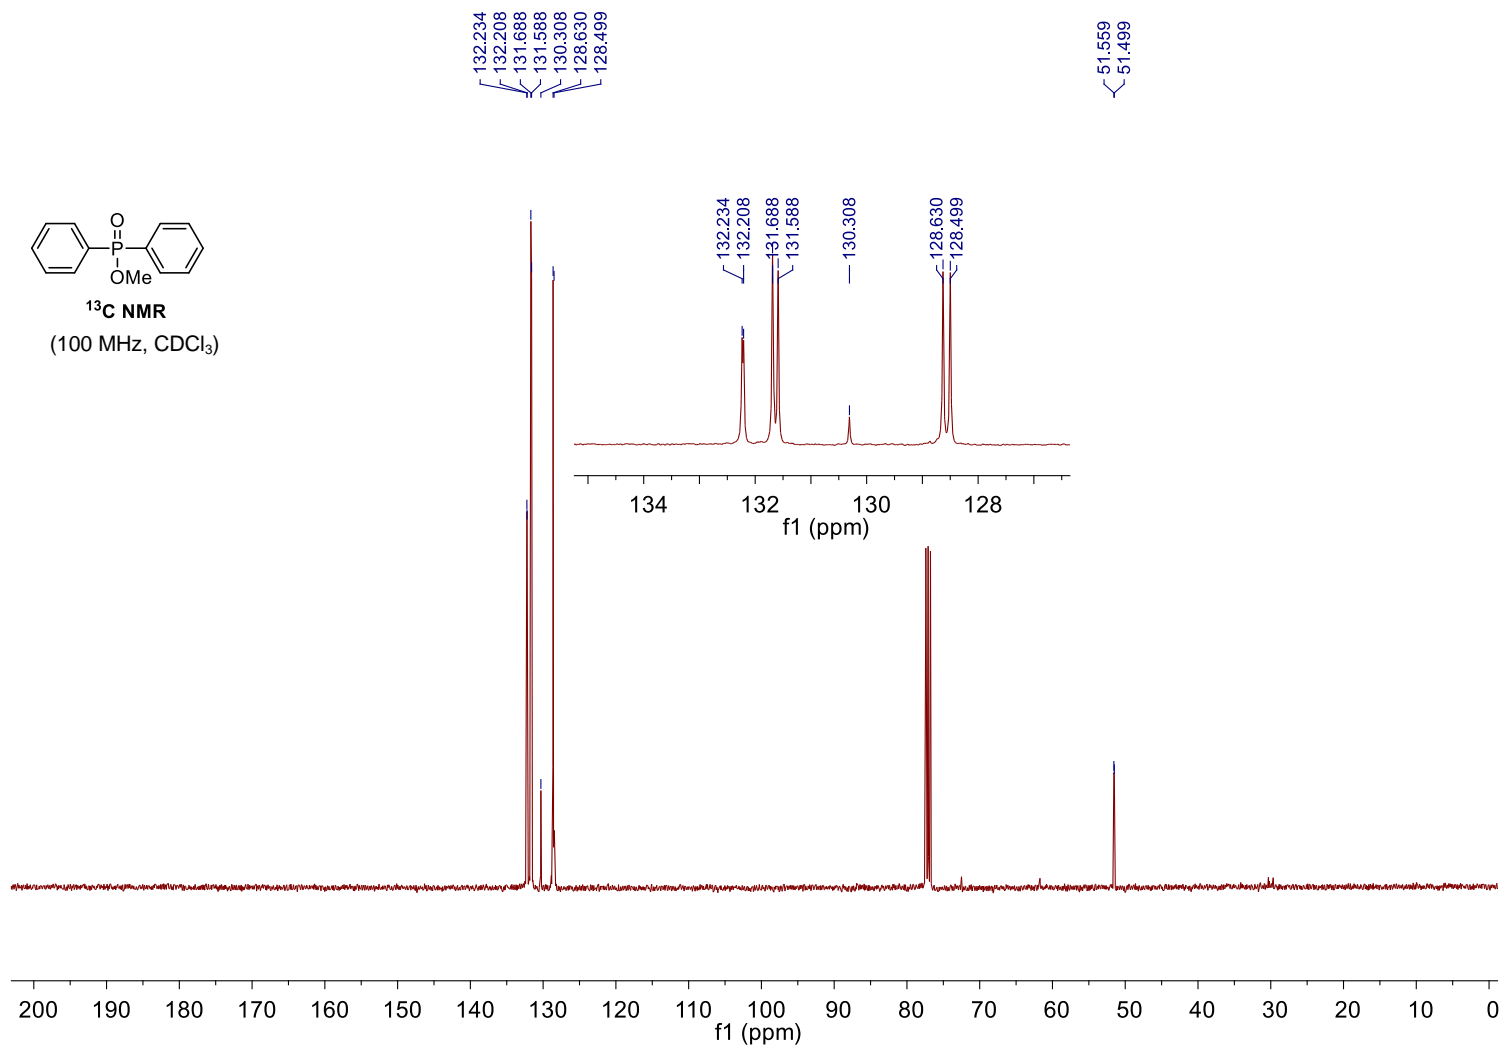

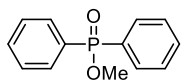

**<sup>31</sup>P NMR**  
(162 MHz, CDCl<sub>3</sub>)

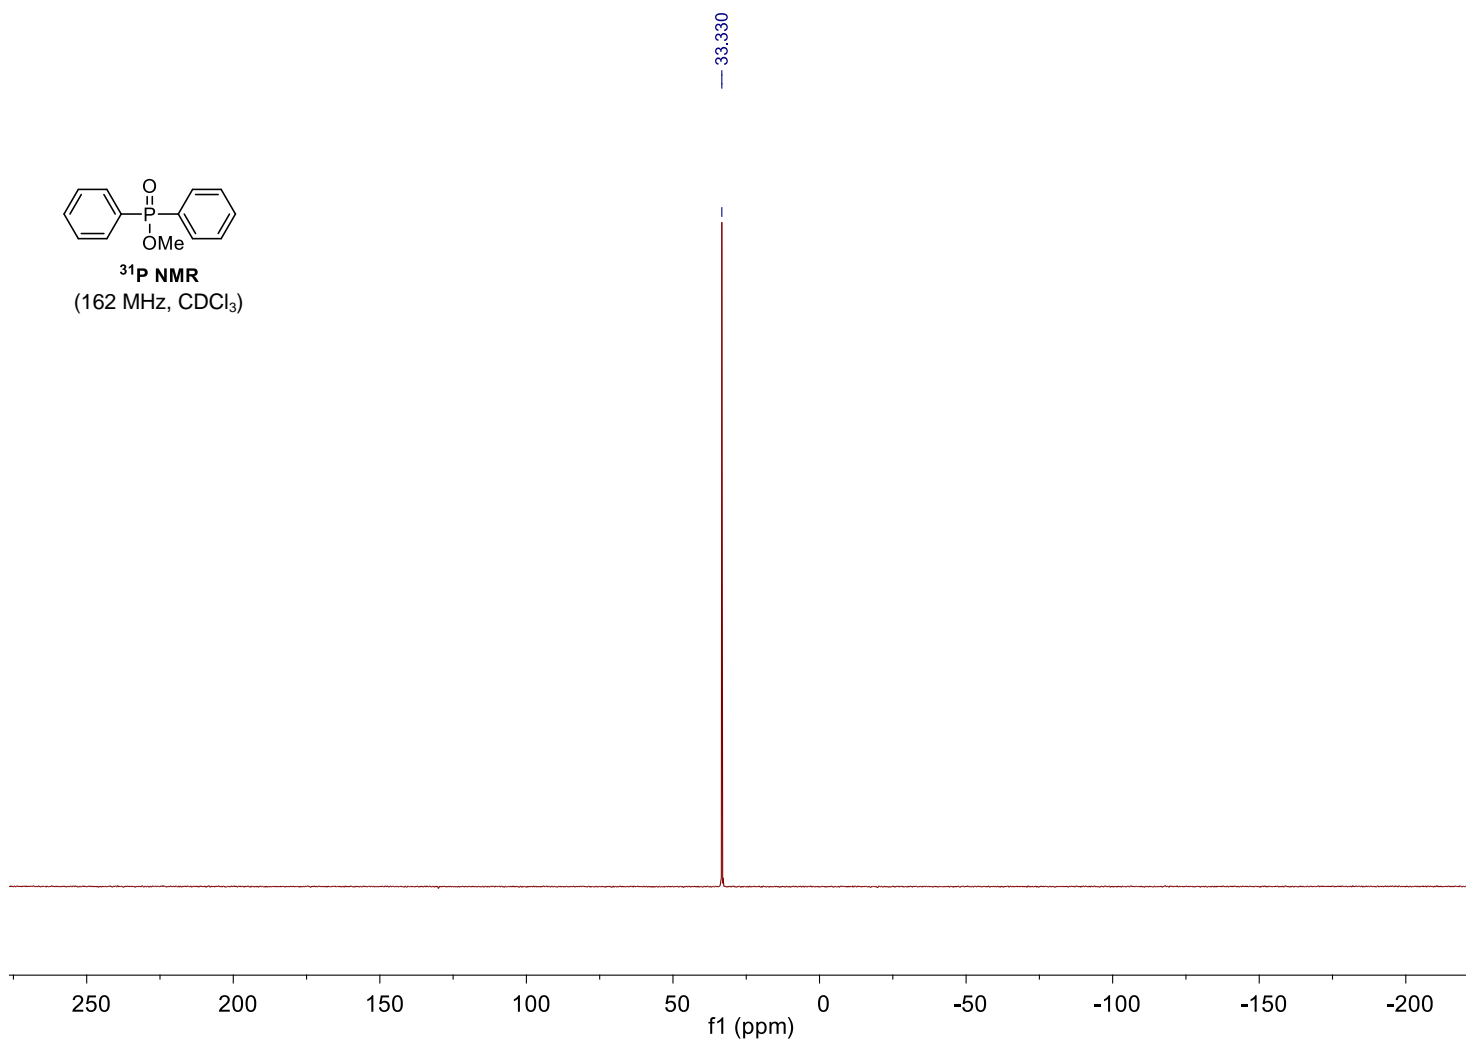

S114

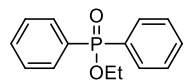

**<sup>1</sup>H NMR**  
(400 MHz, CDCl<sub>3</sub>)

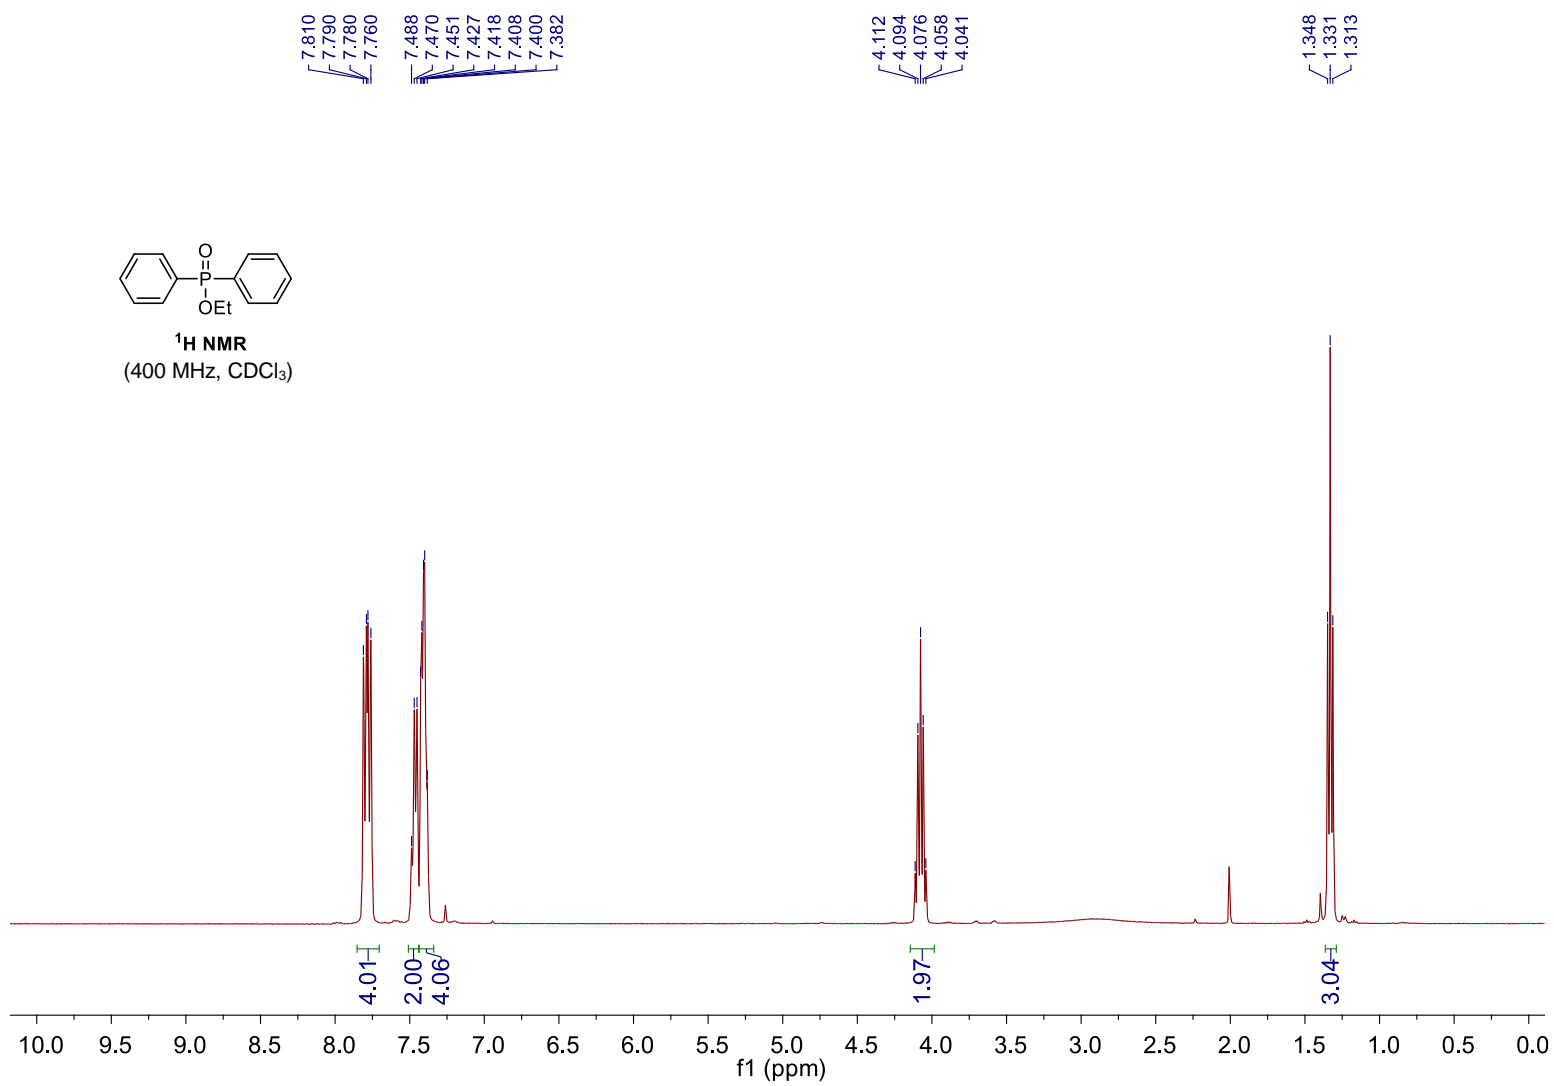

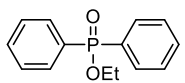

<sup>13</sup>C NMR  
(100 MHz, CDCl<sub>3</sub>)

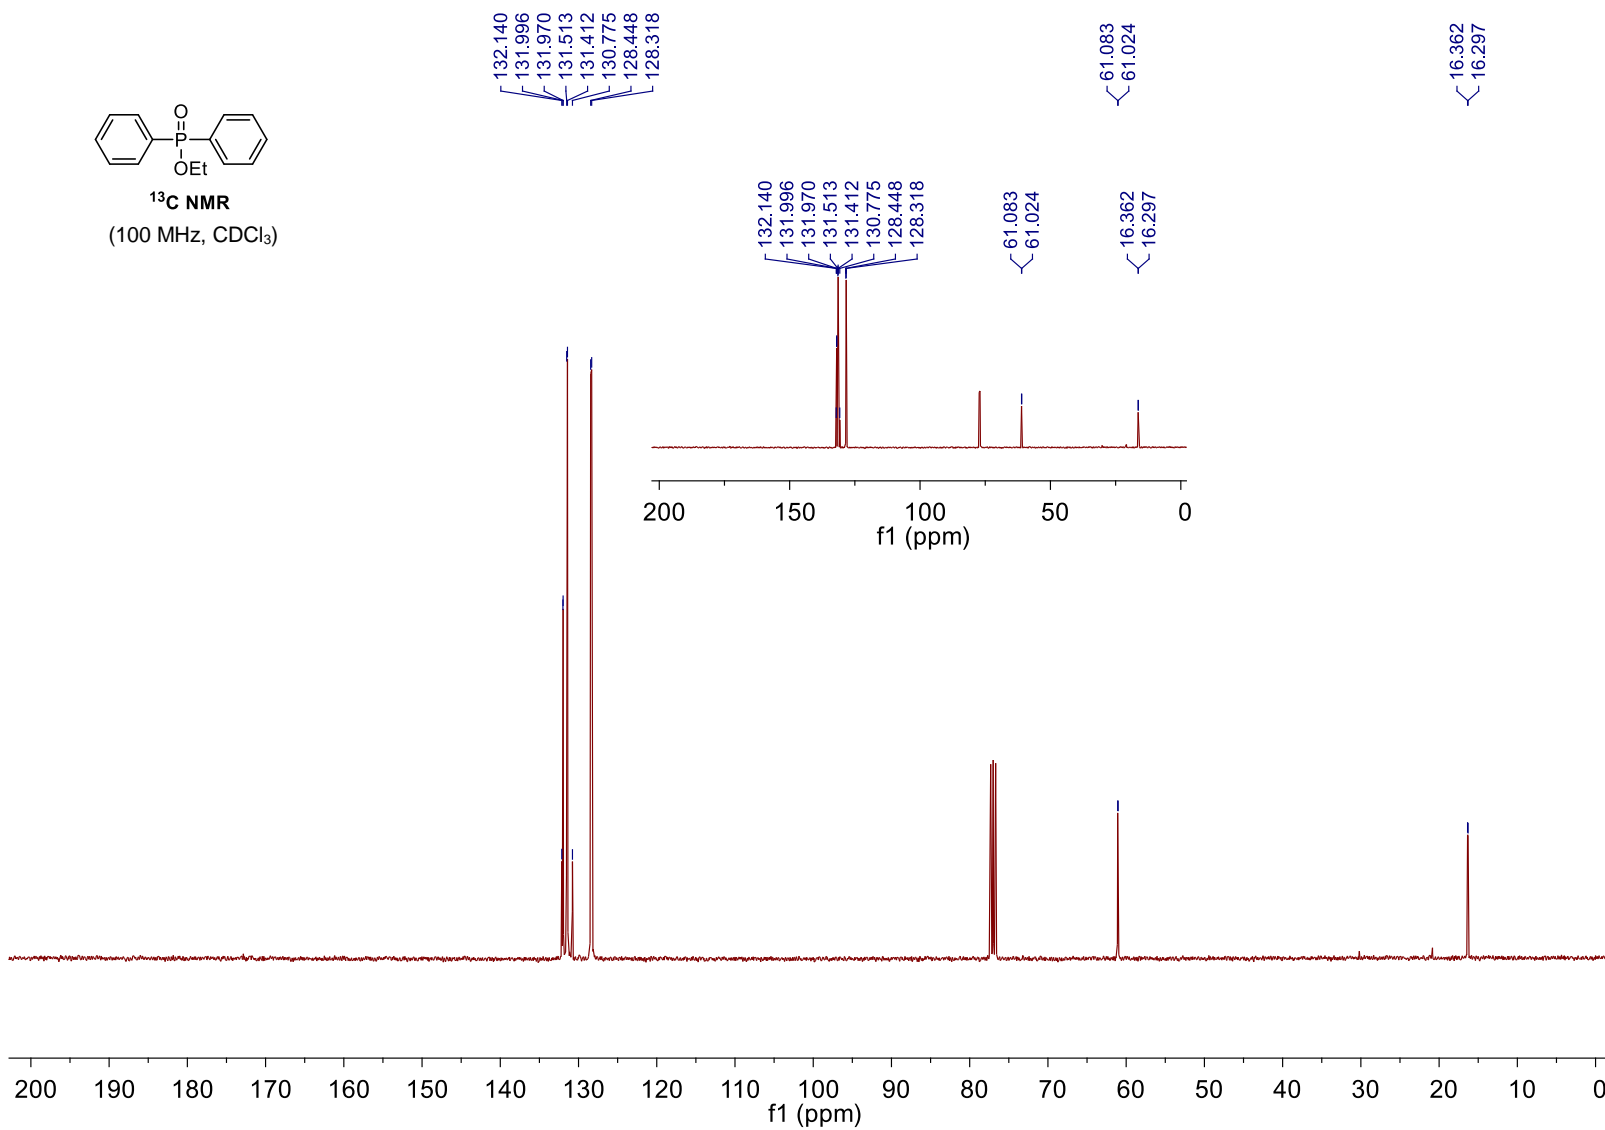

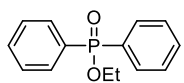

**<sup>31</sup>P NMR**  
(162 MHz, CDCl<sub>3</sub>)

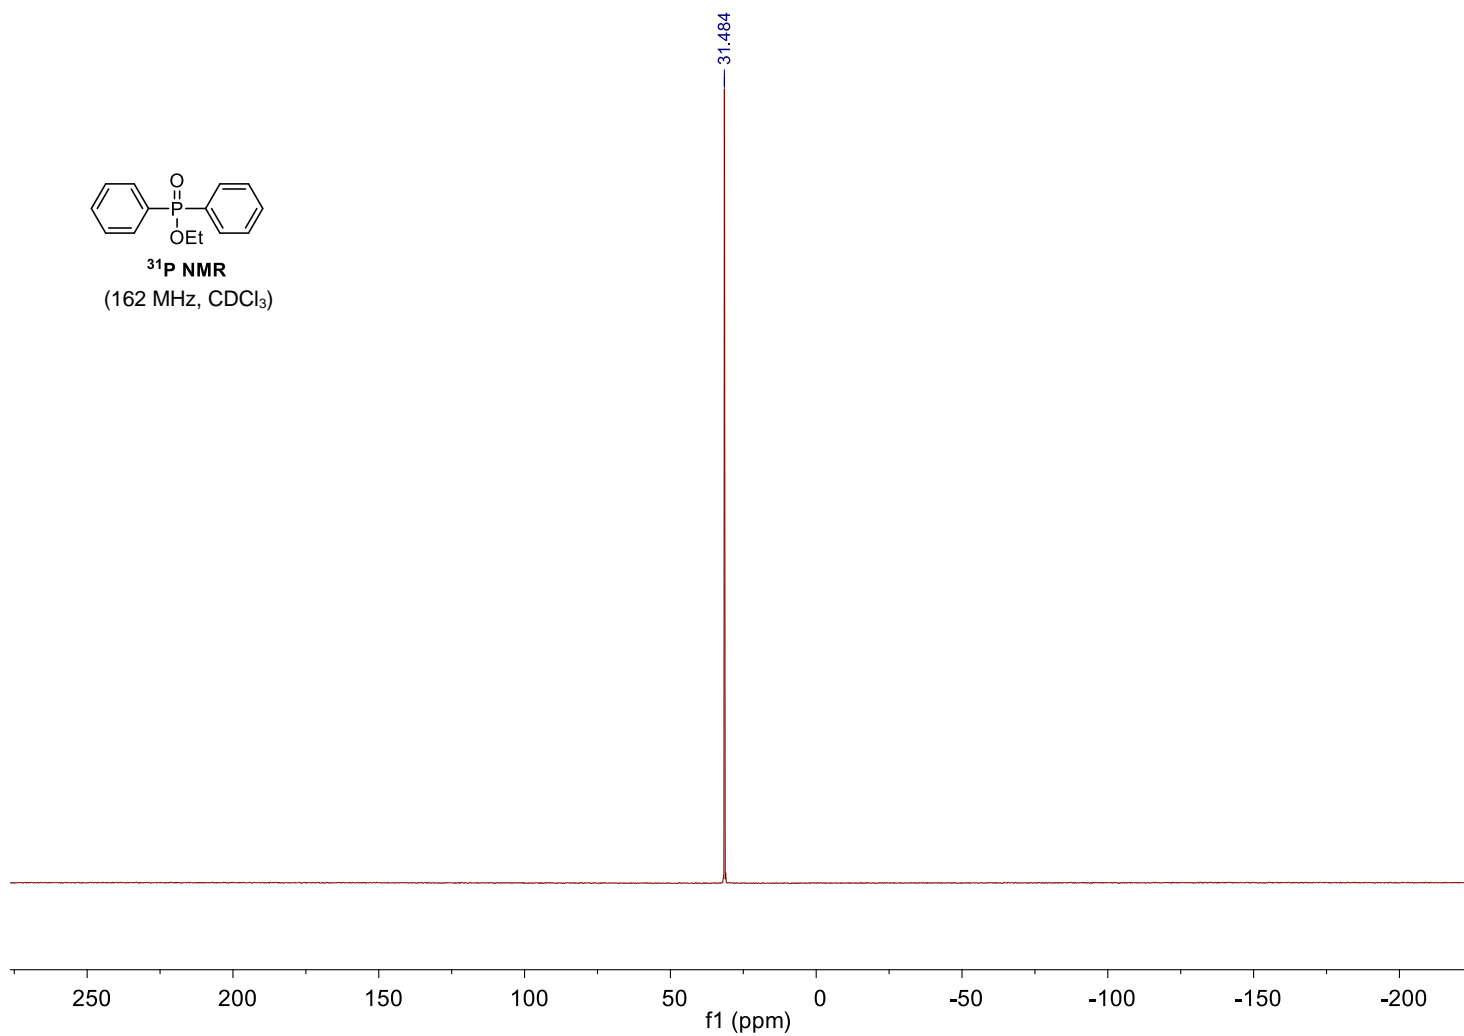

S117

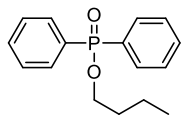

<sup>1</sup>H NMR  
(400 MHz, CDCl<sub>3</sub>)

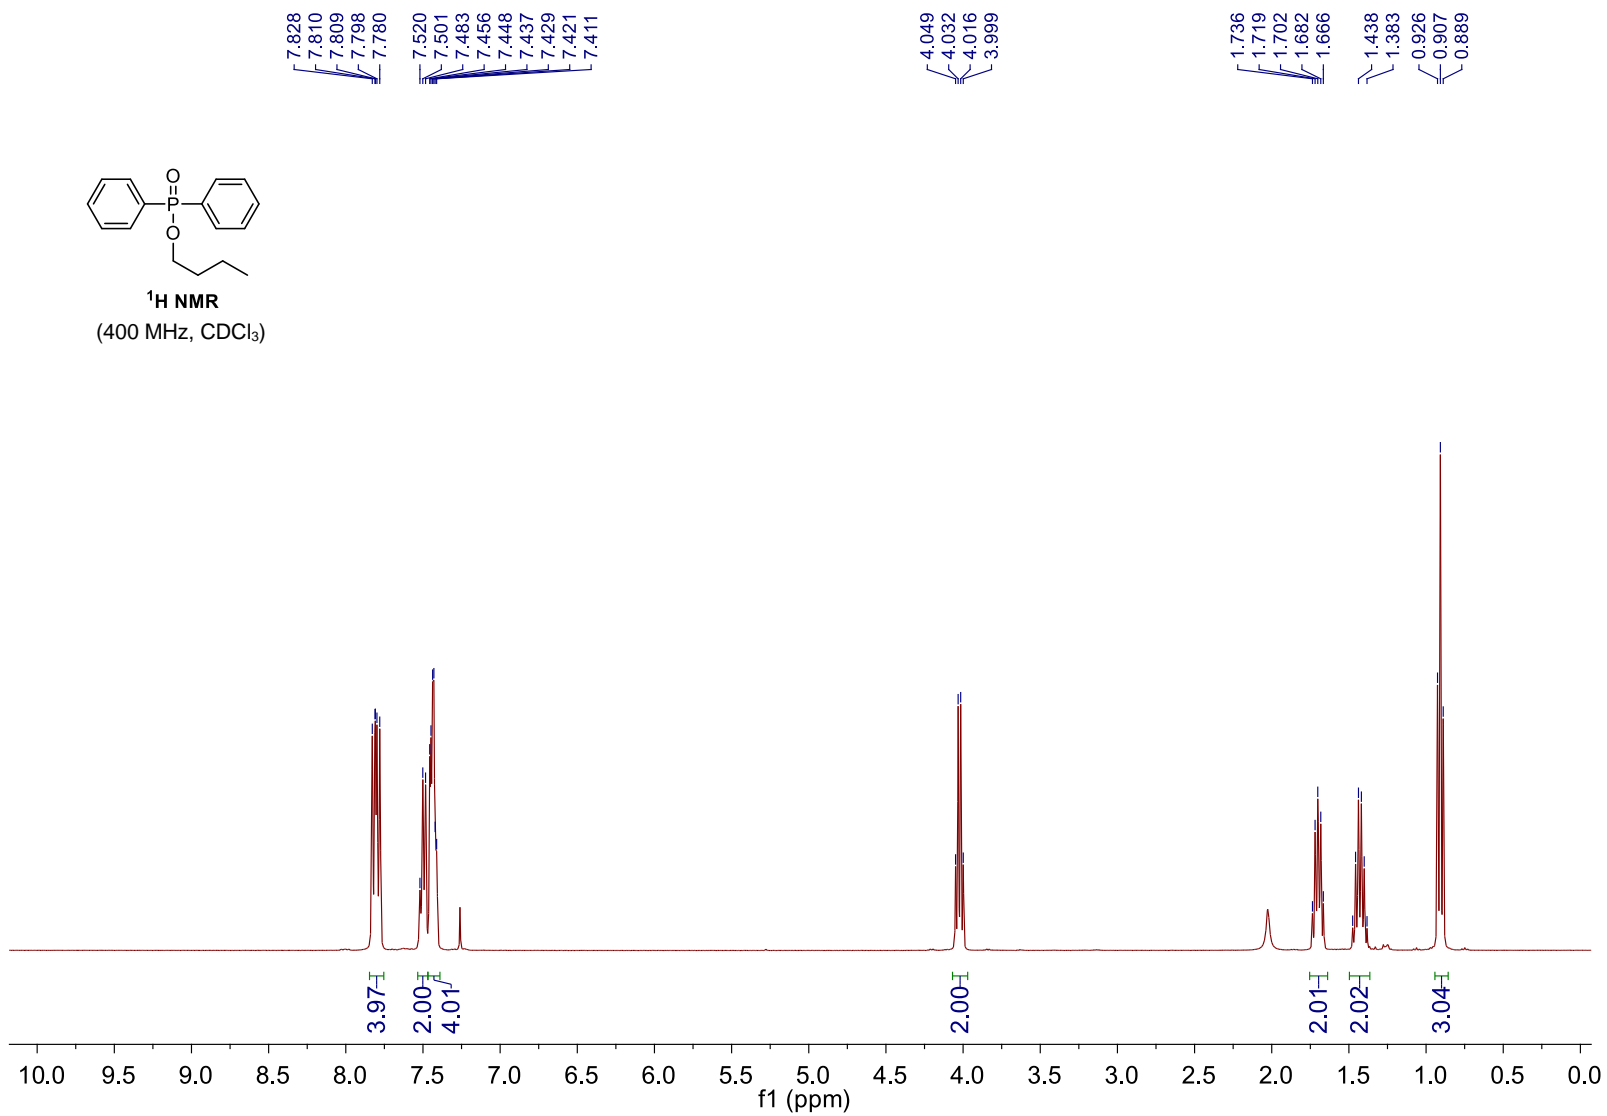

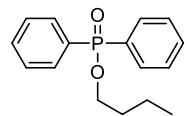

<sup>13</sup>C NMR  
(100 MHz, CDCl<sub>3</sub>)

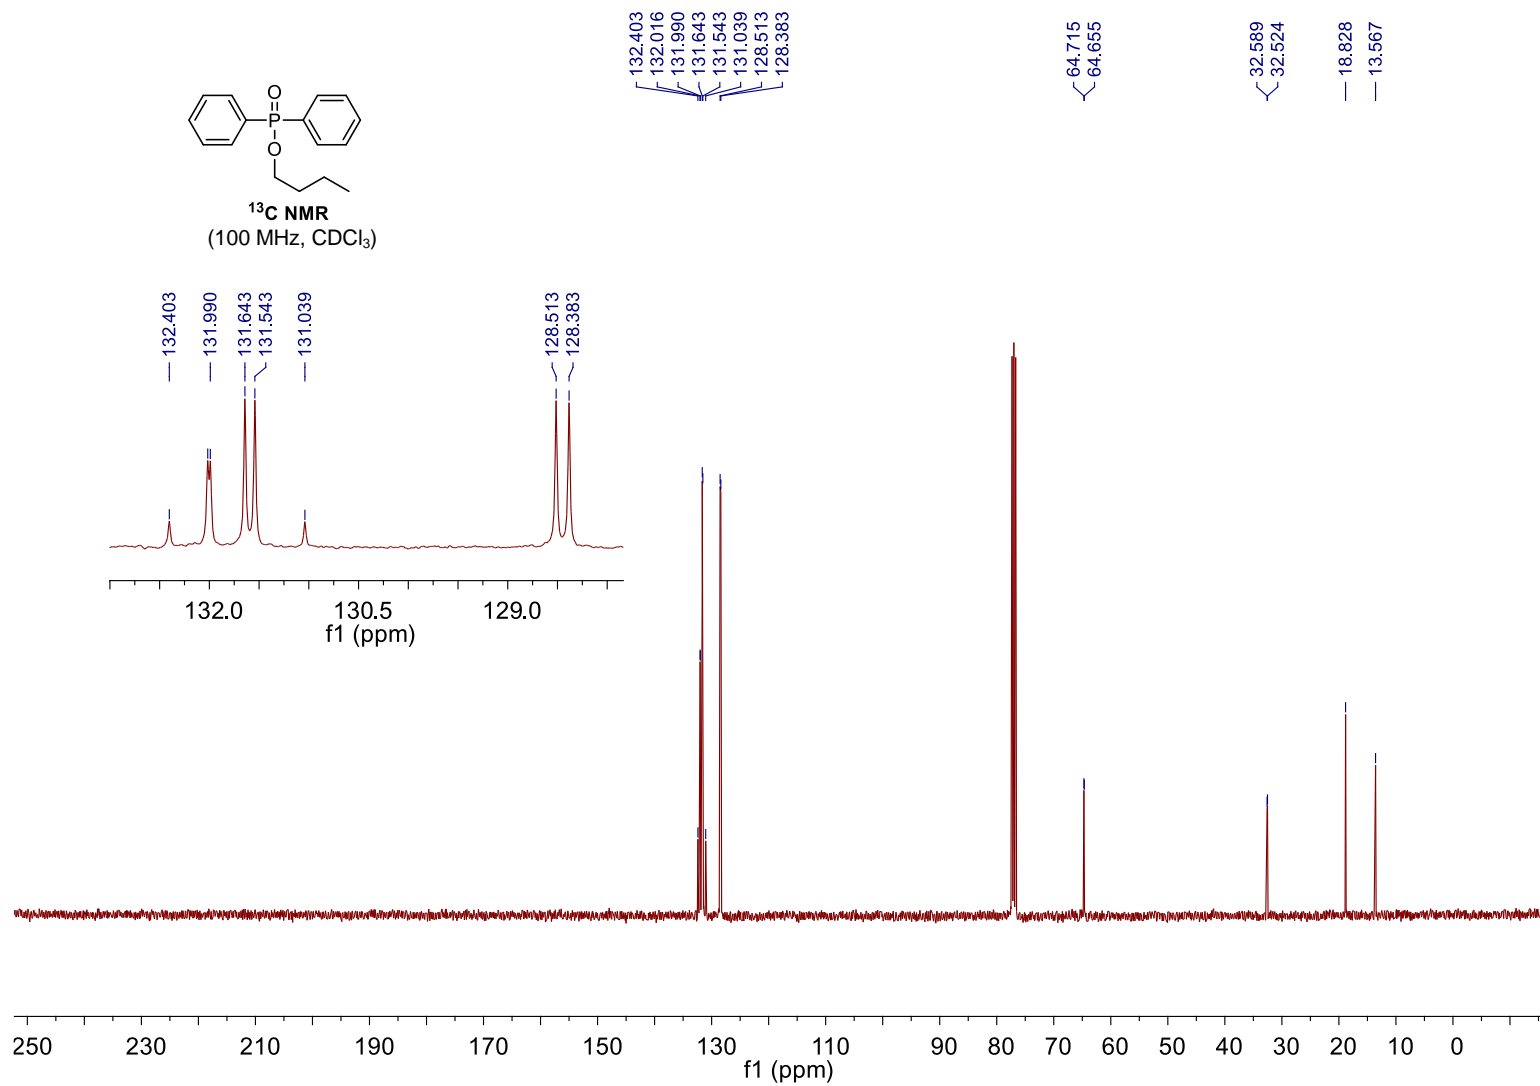

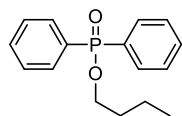

**<sup>31</sup>P NMR**  
(162 MHz, CDCl<sub>3</sub>)

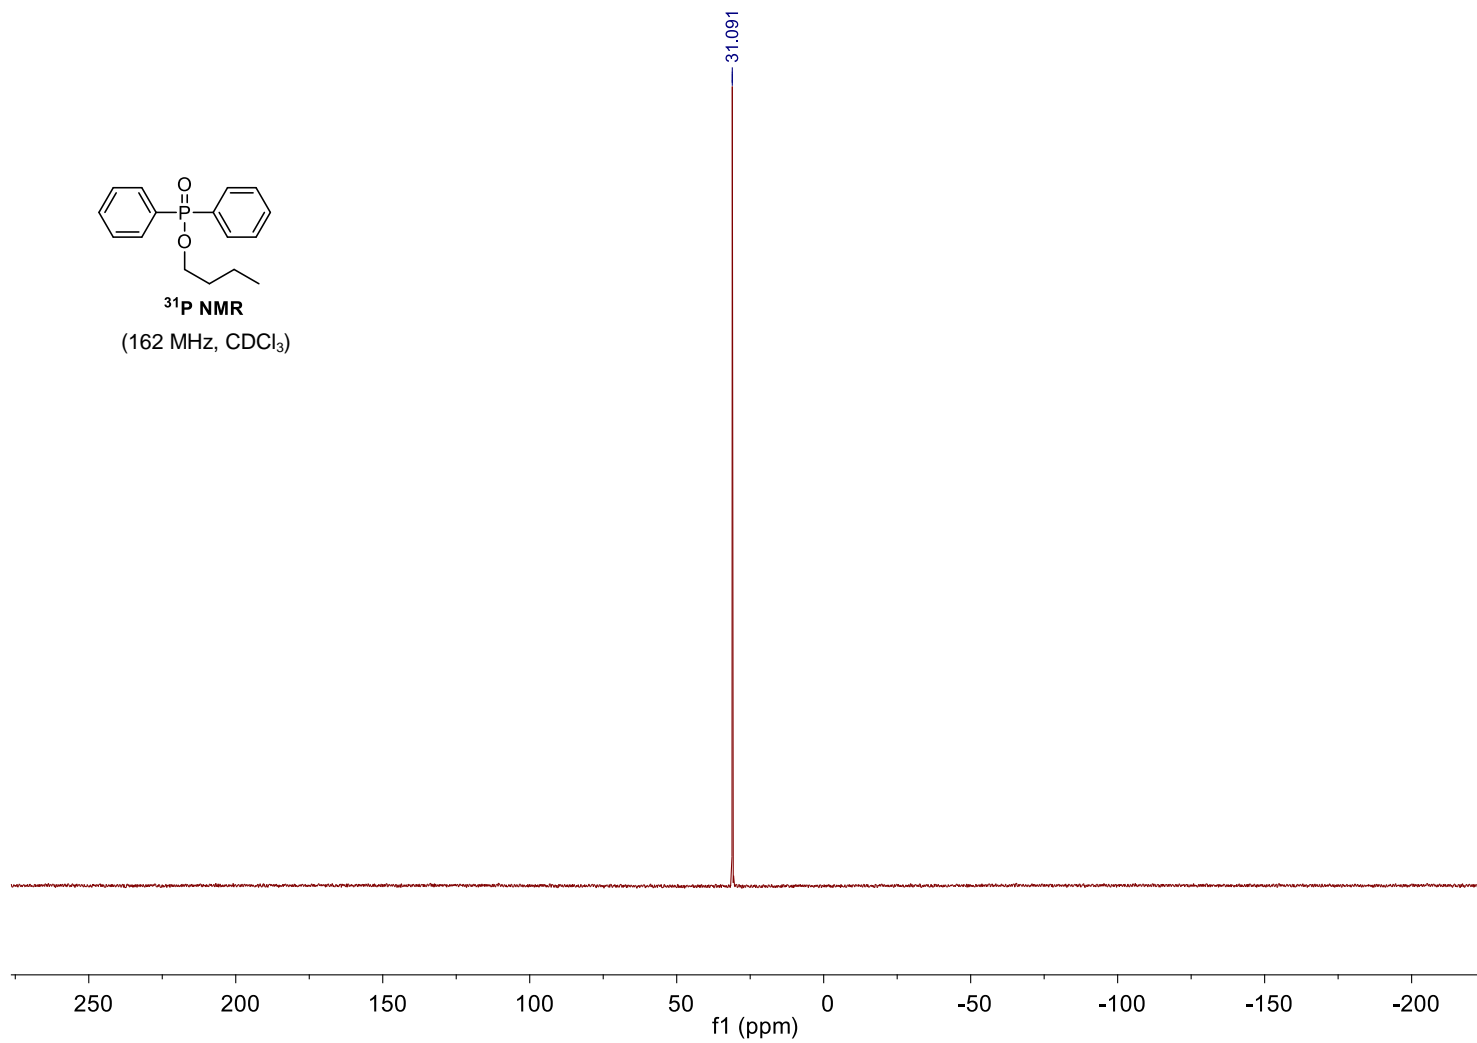

S120



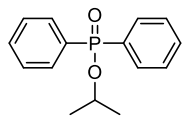

**<sup>1</sup>H NMR**  
(400 MHz, CDCl<sub>3</sub>)

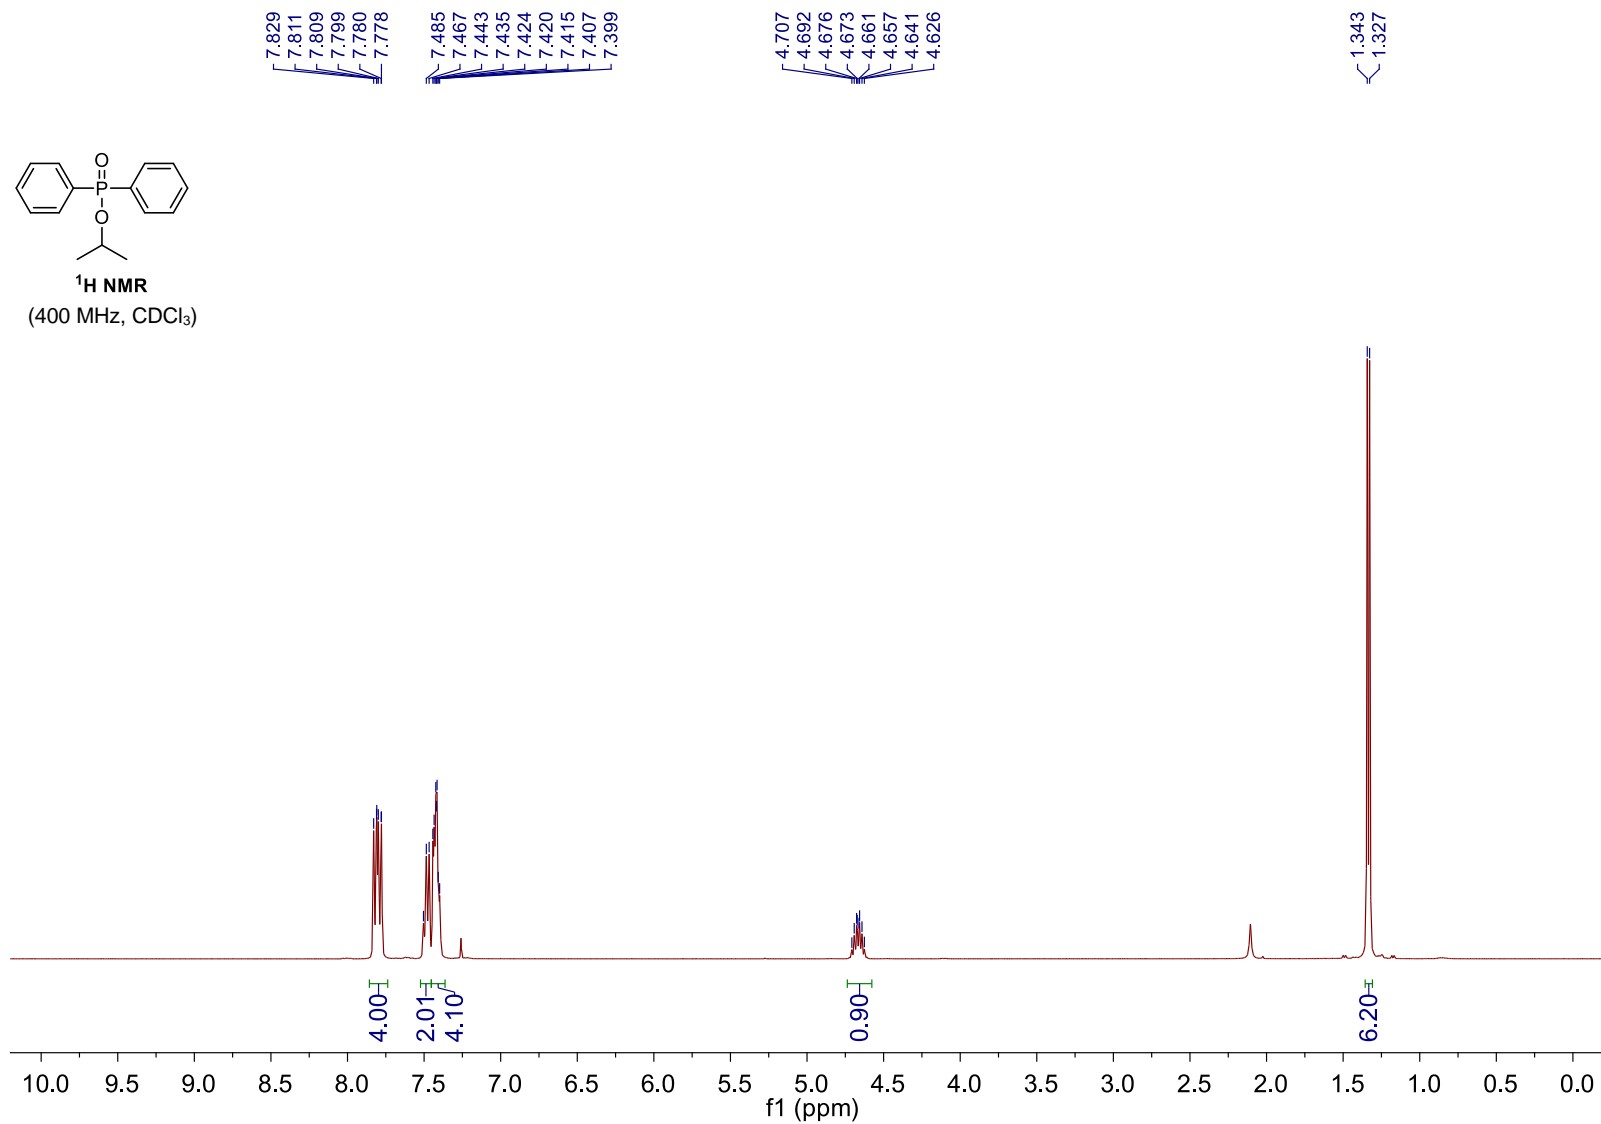

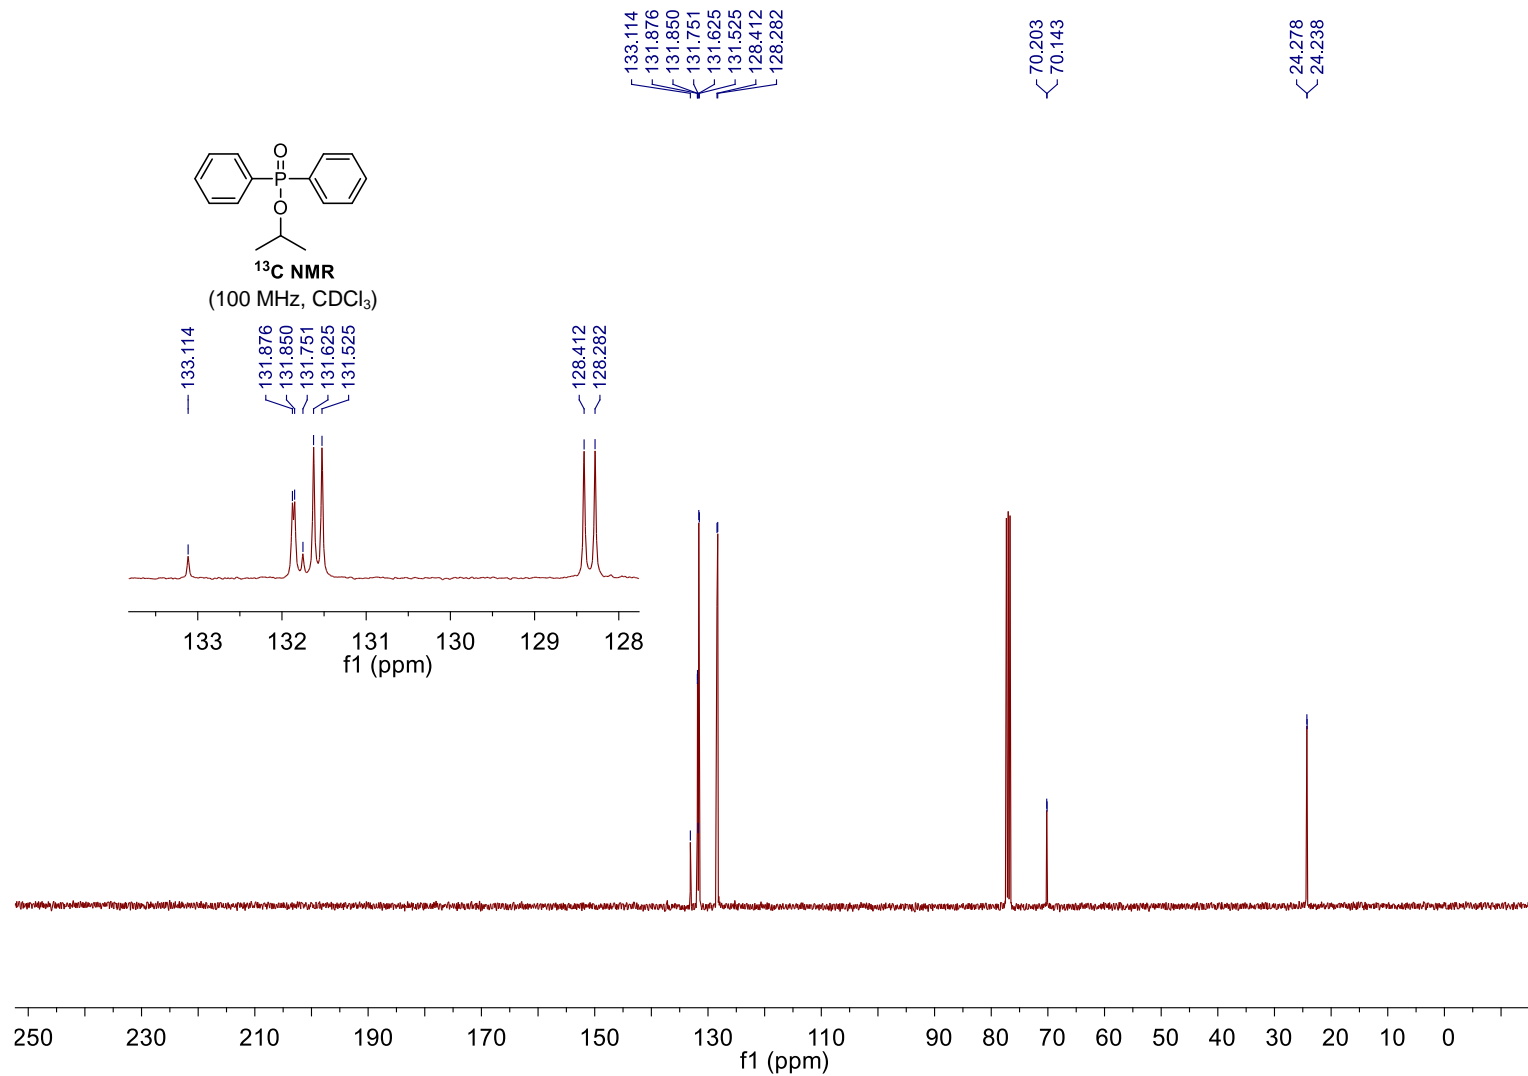

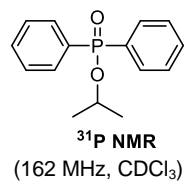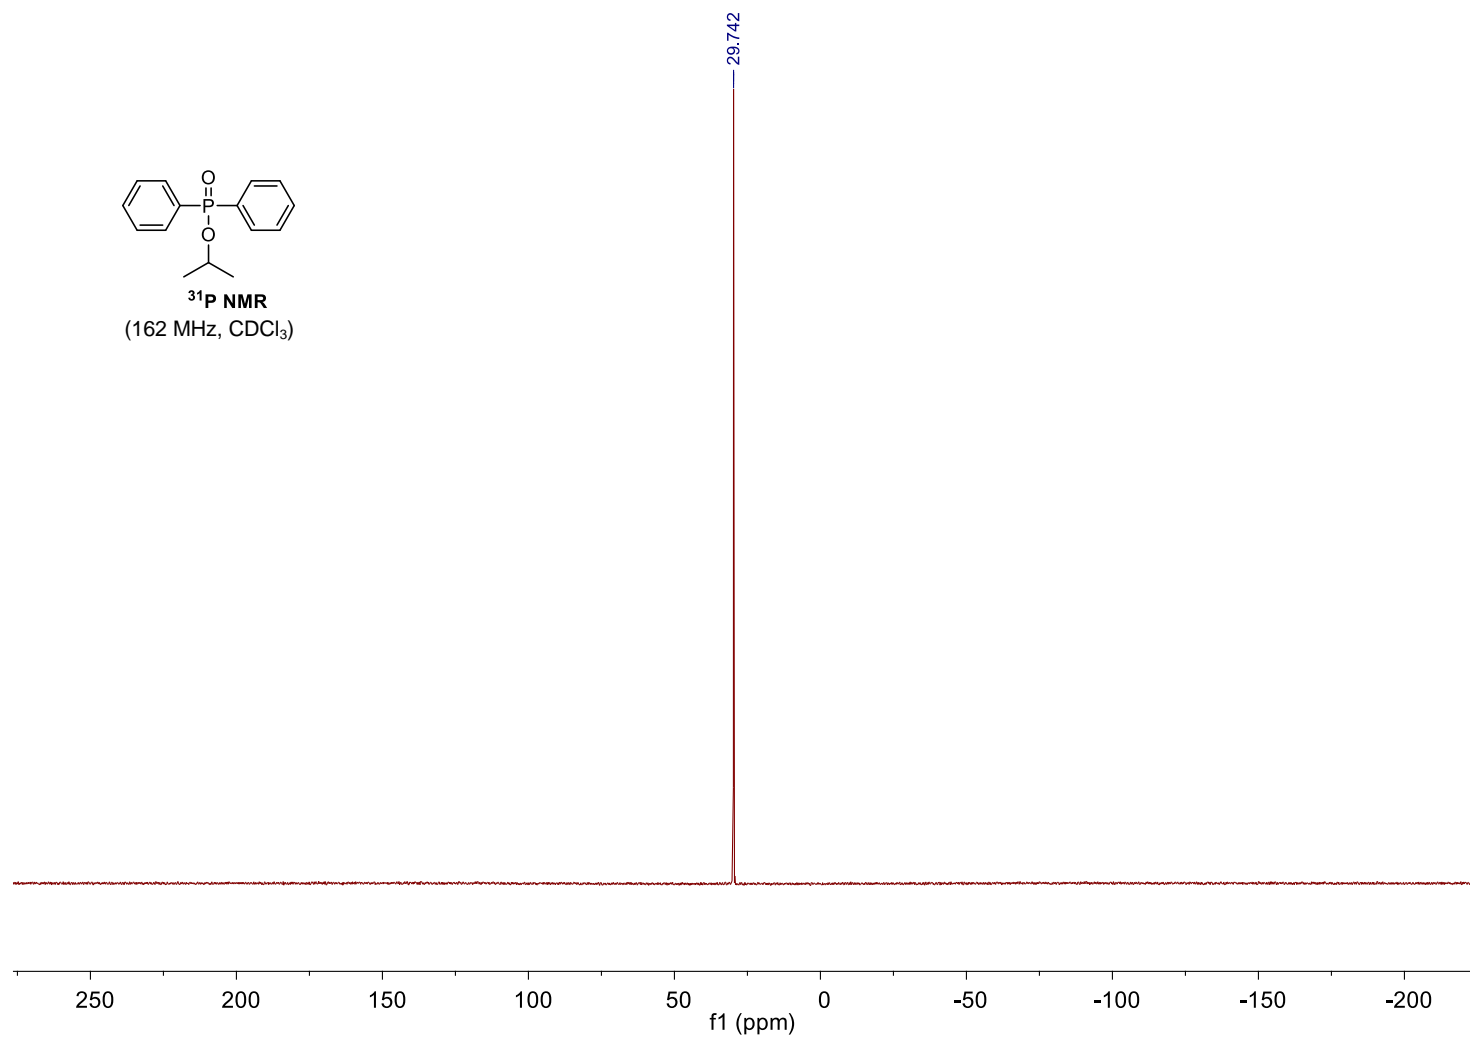

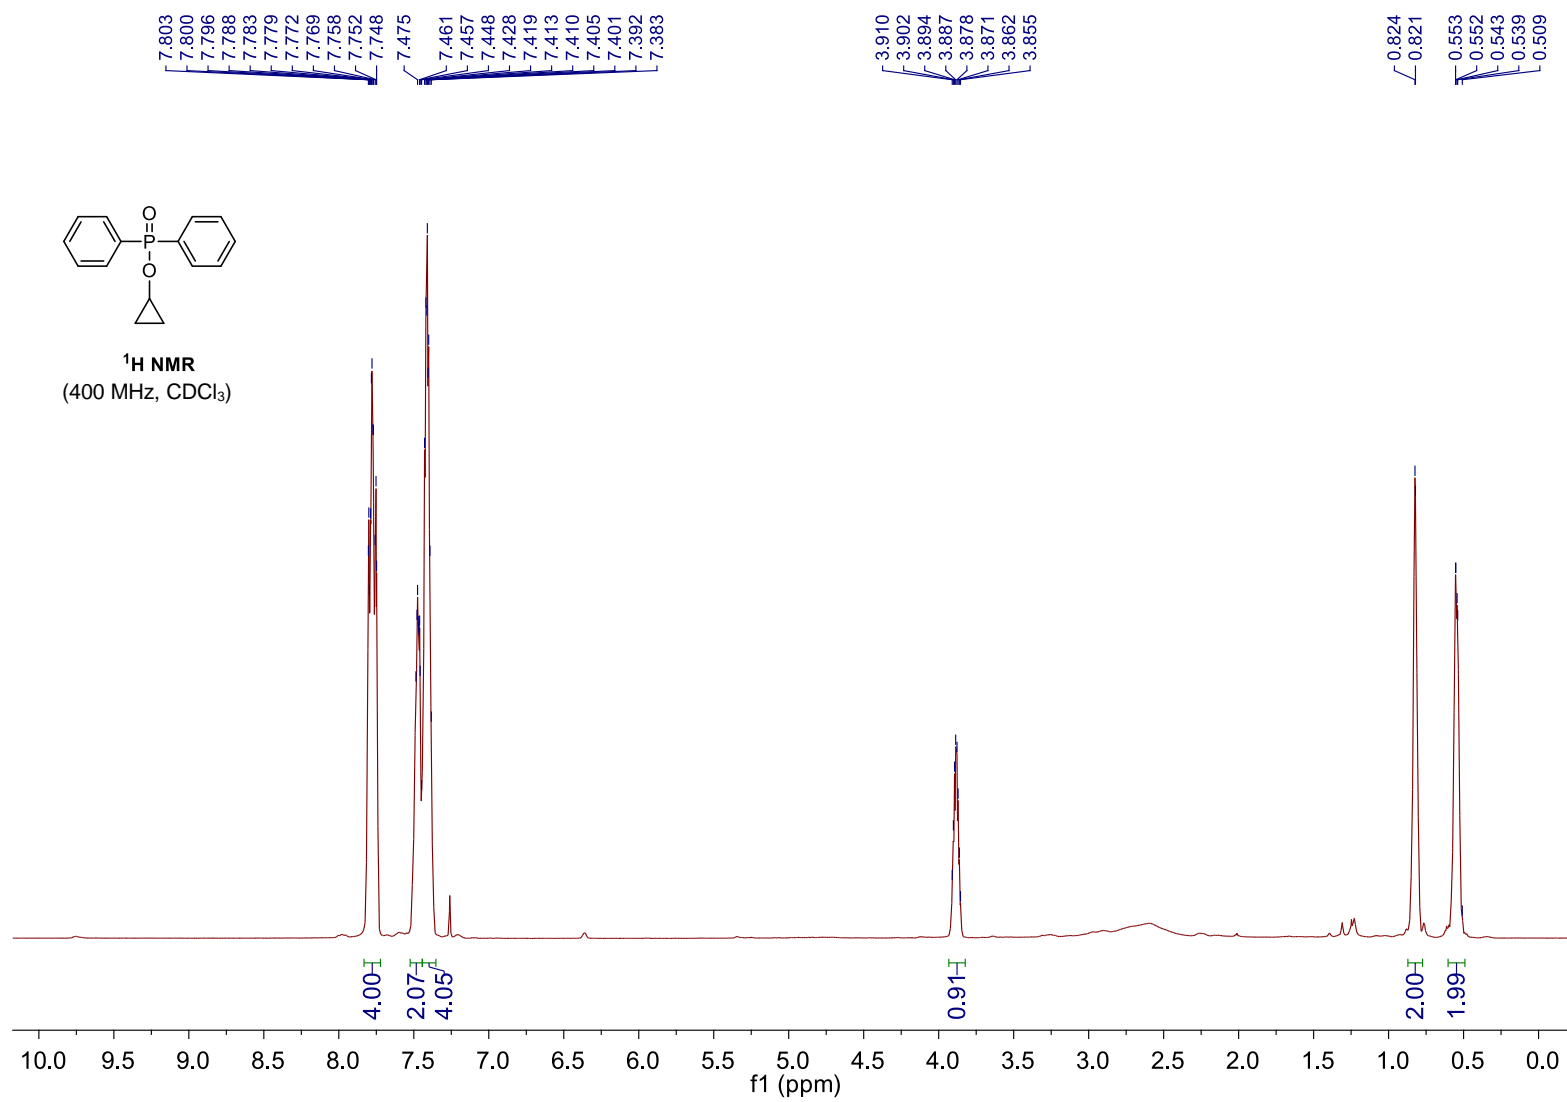

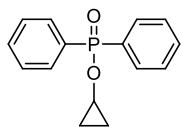

<sup>13</sup>C NMR  
(100 MHz, CDCl<sub>3</sub>)

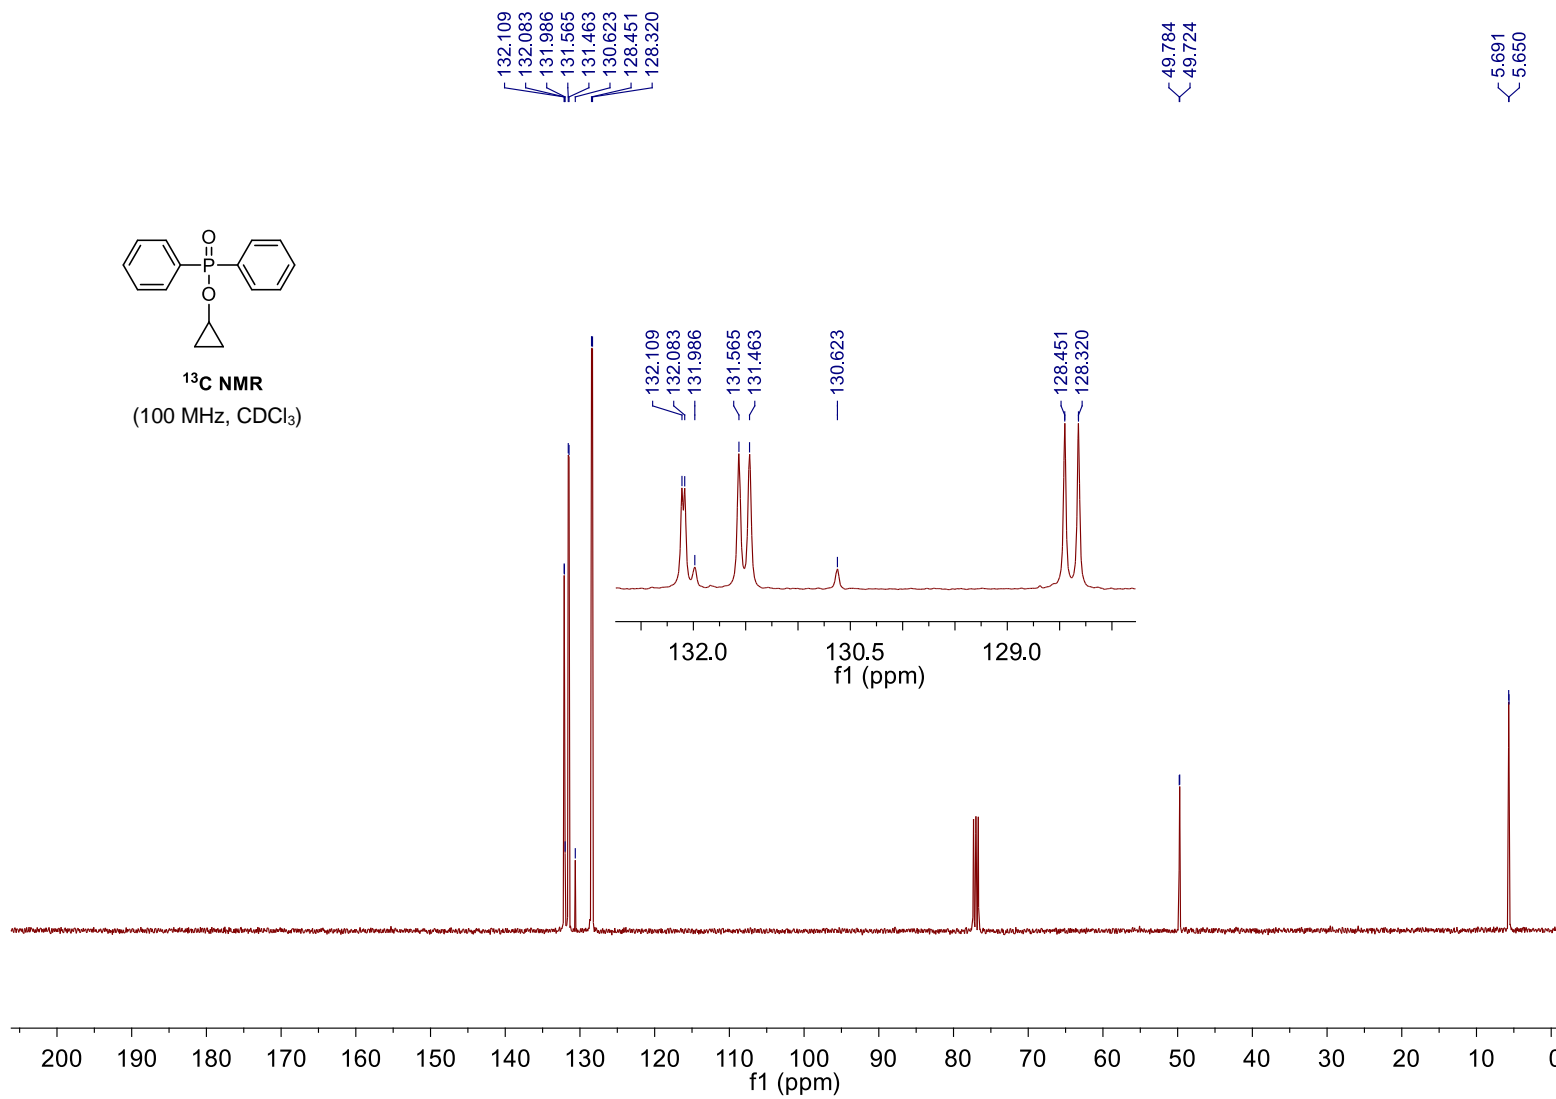

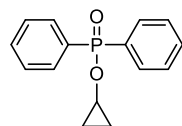

**<sup>31</sup>P NMR**  
(162 MHz, CDCl<sub>3</sub>)

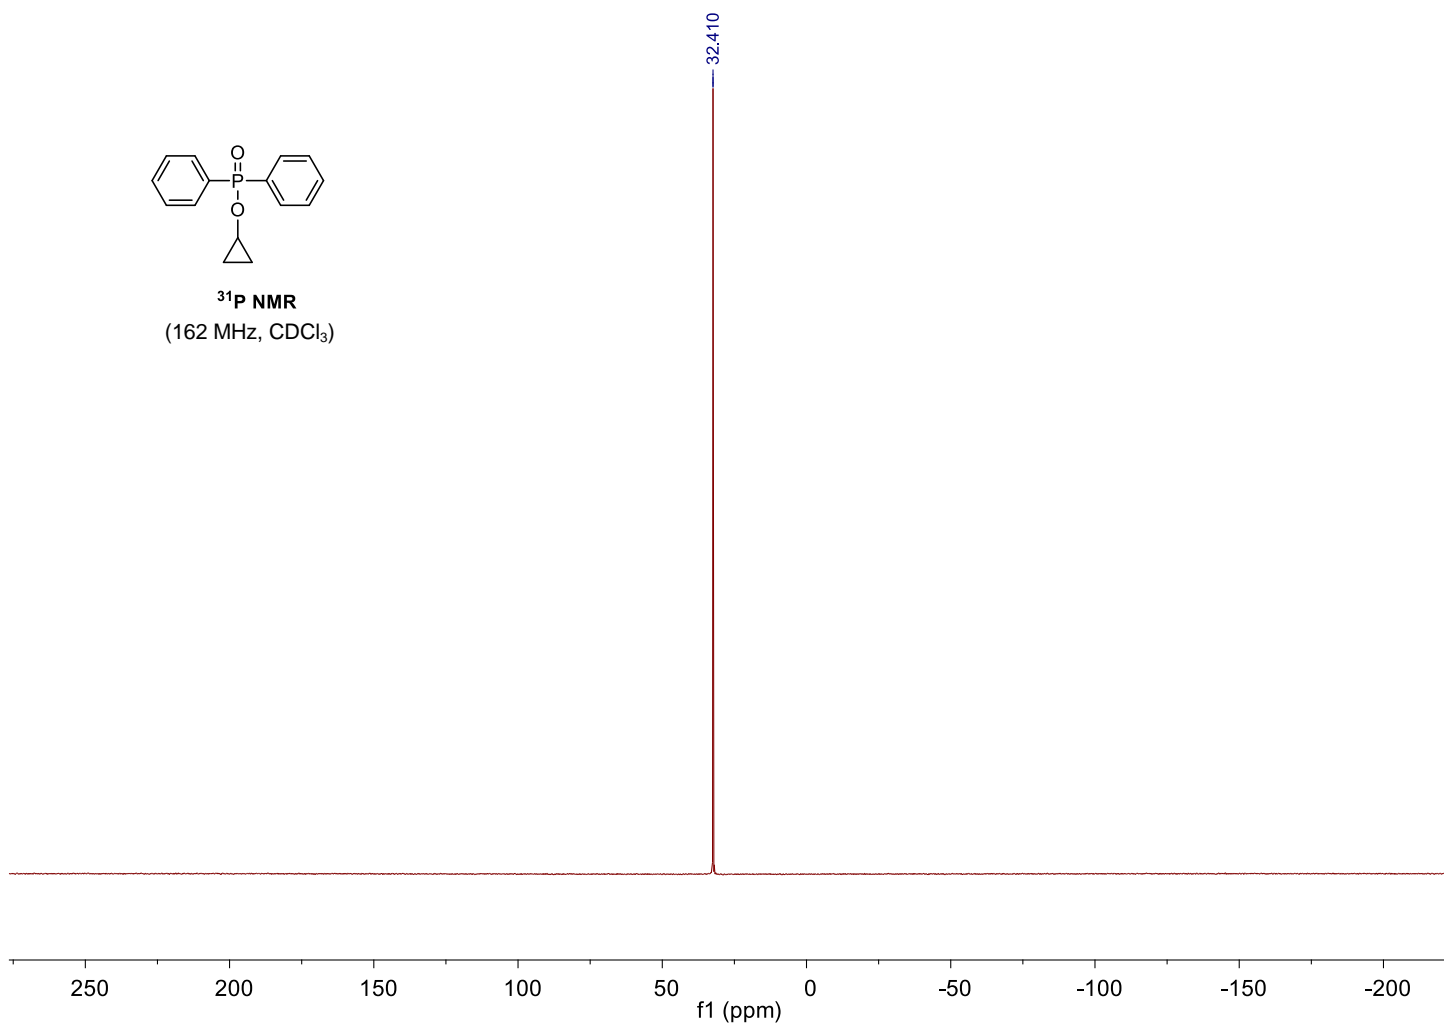

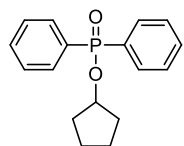

**<sup>1</sup>H NMR**  
(400 MHz, CDCl<sub>3</sub>)

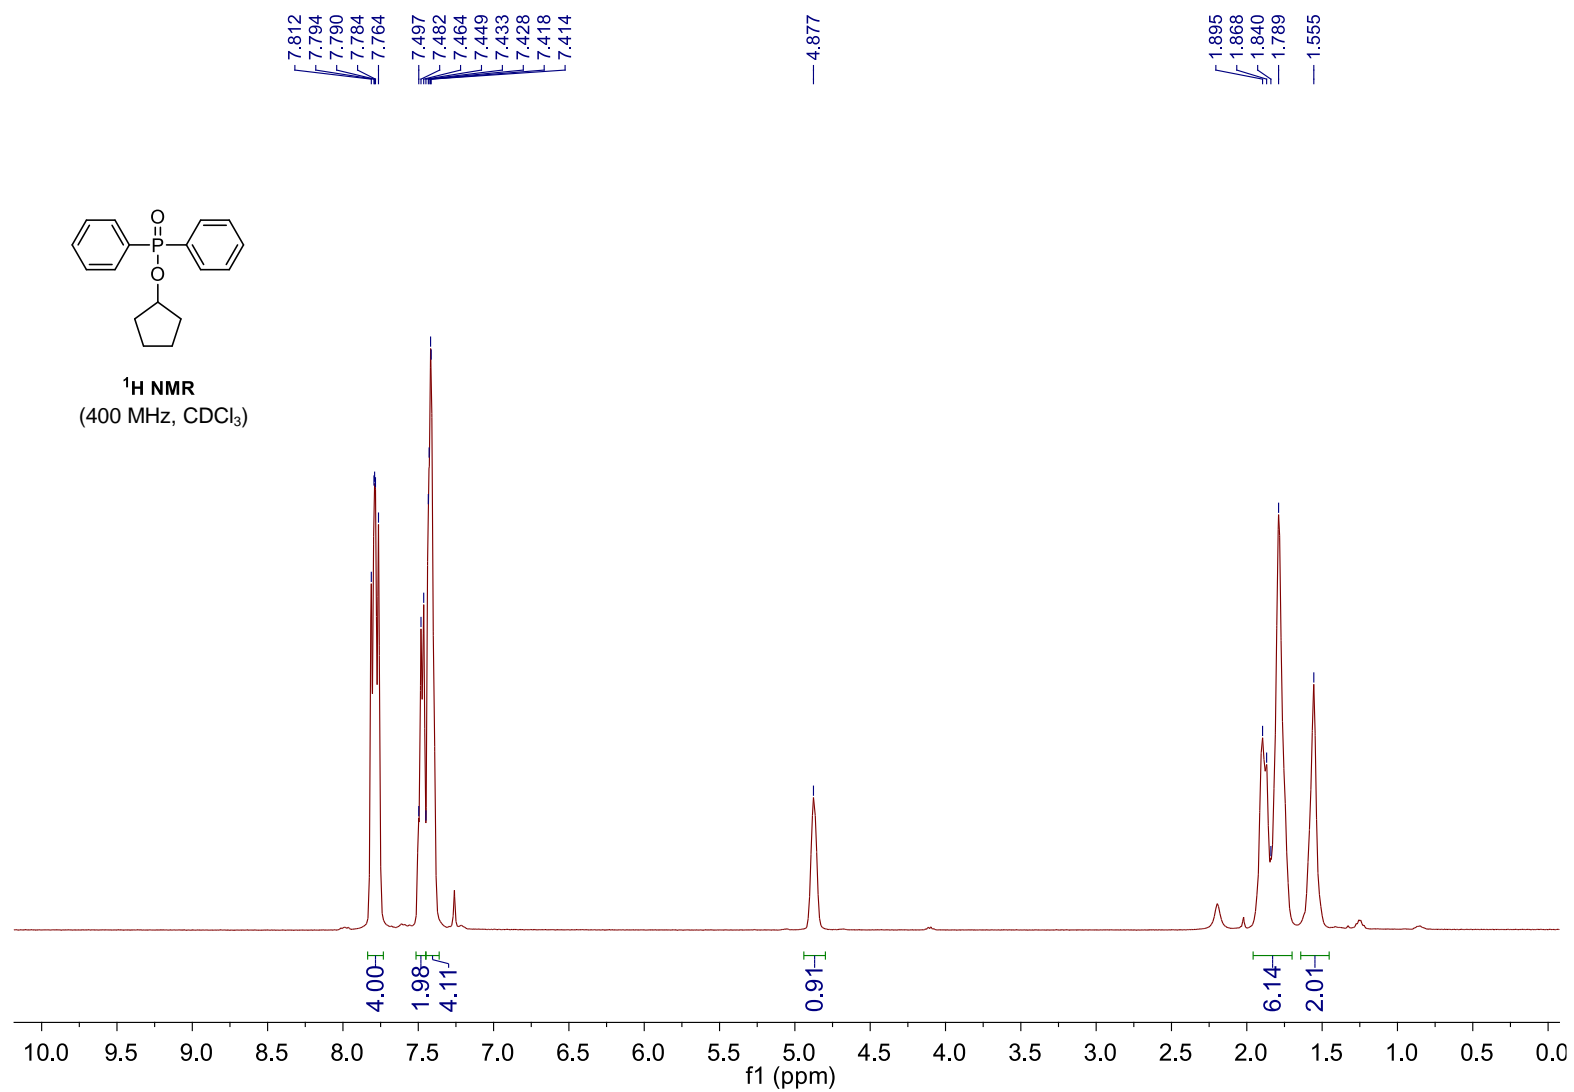

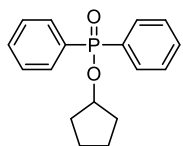

**<sup>13</sup>C NMR**  
(100 MHz, CDCl<sub>3</sub>)

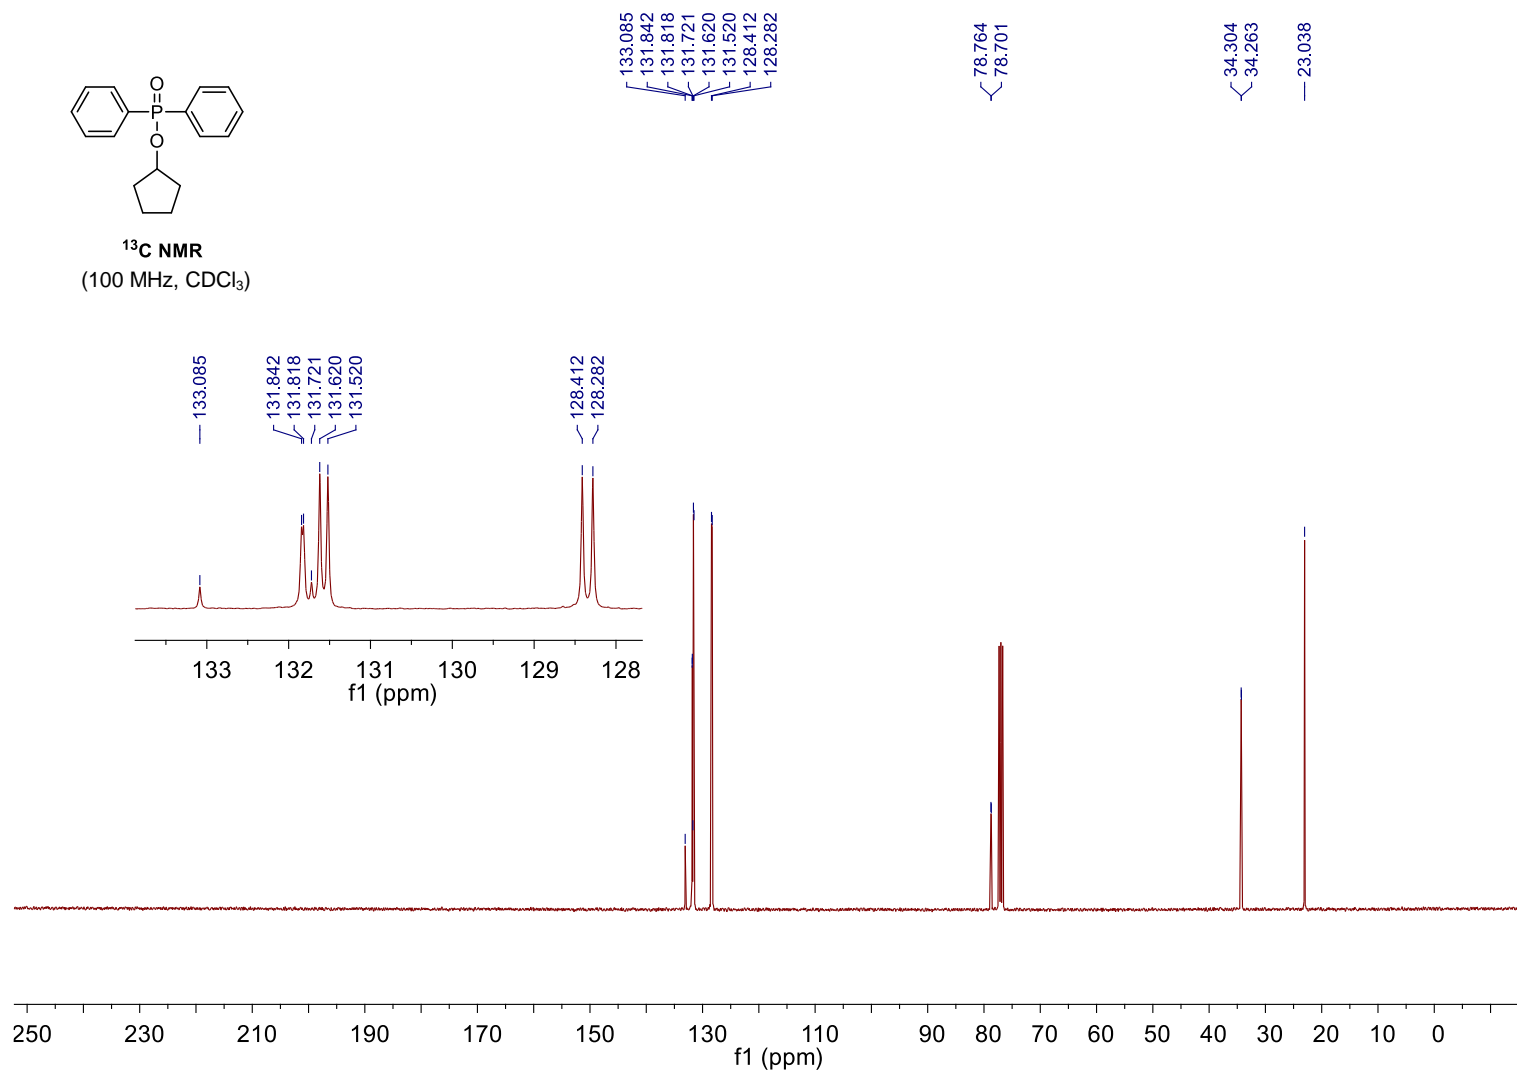



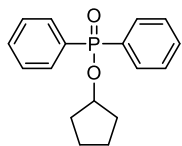

**<sup>31</sup>P NMR**  
(162 MHz, CDCl<sub>3</sub>)

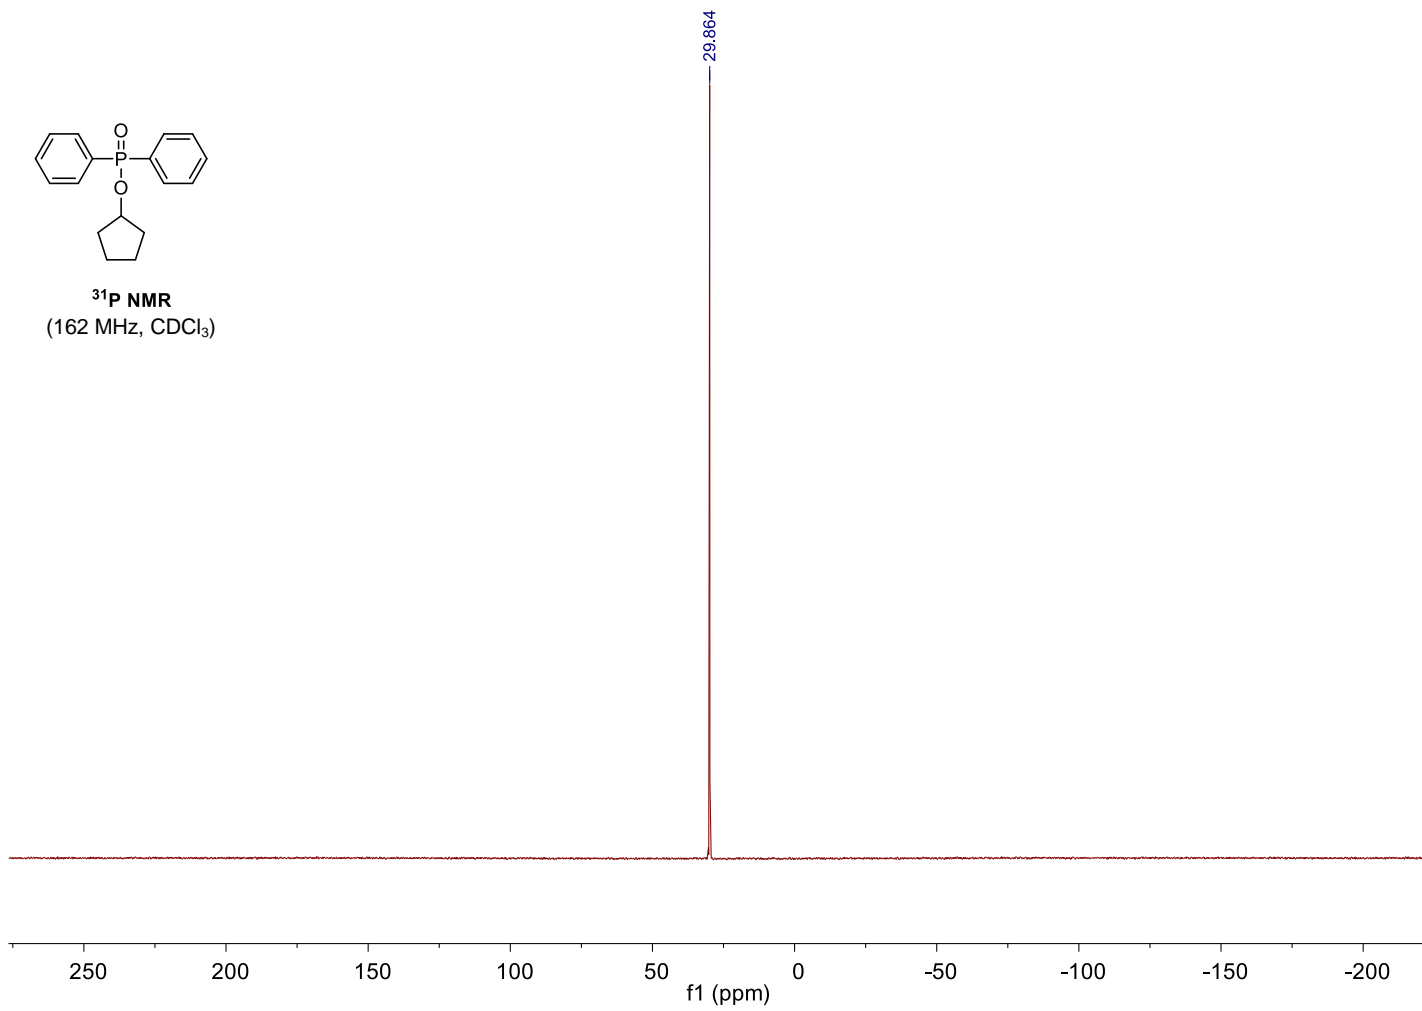

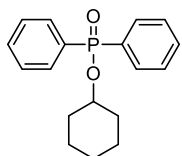

<sup>1</sup>H NMR  
(400 MHz, CDCl<sub>3</sub>)

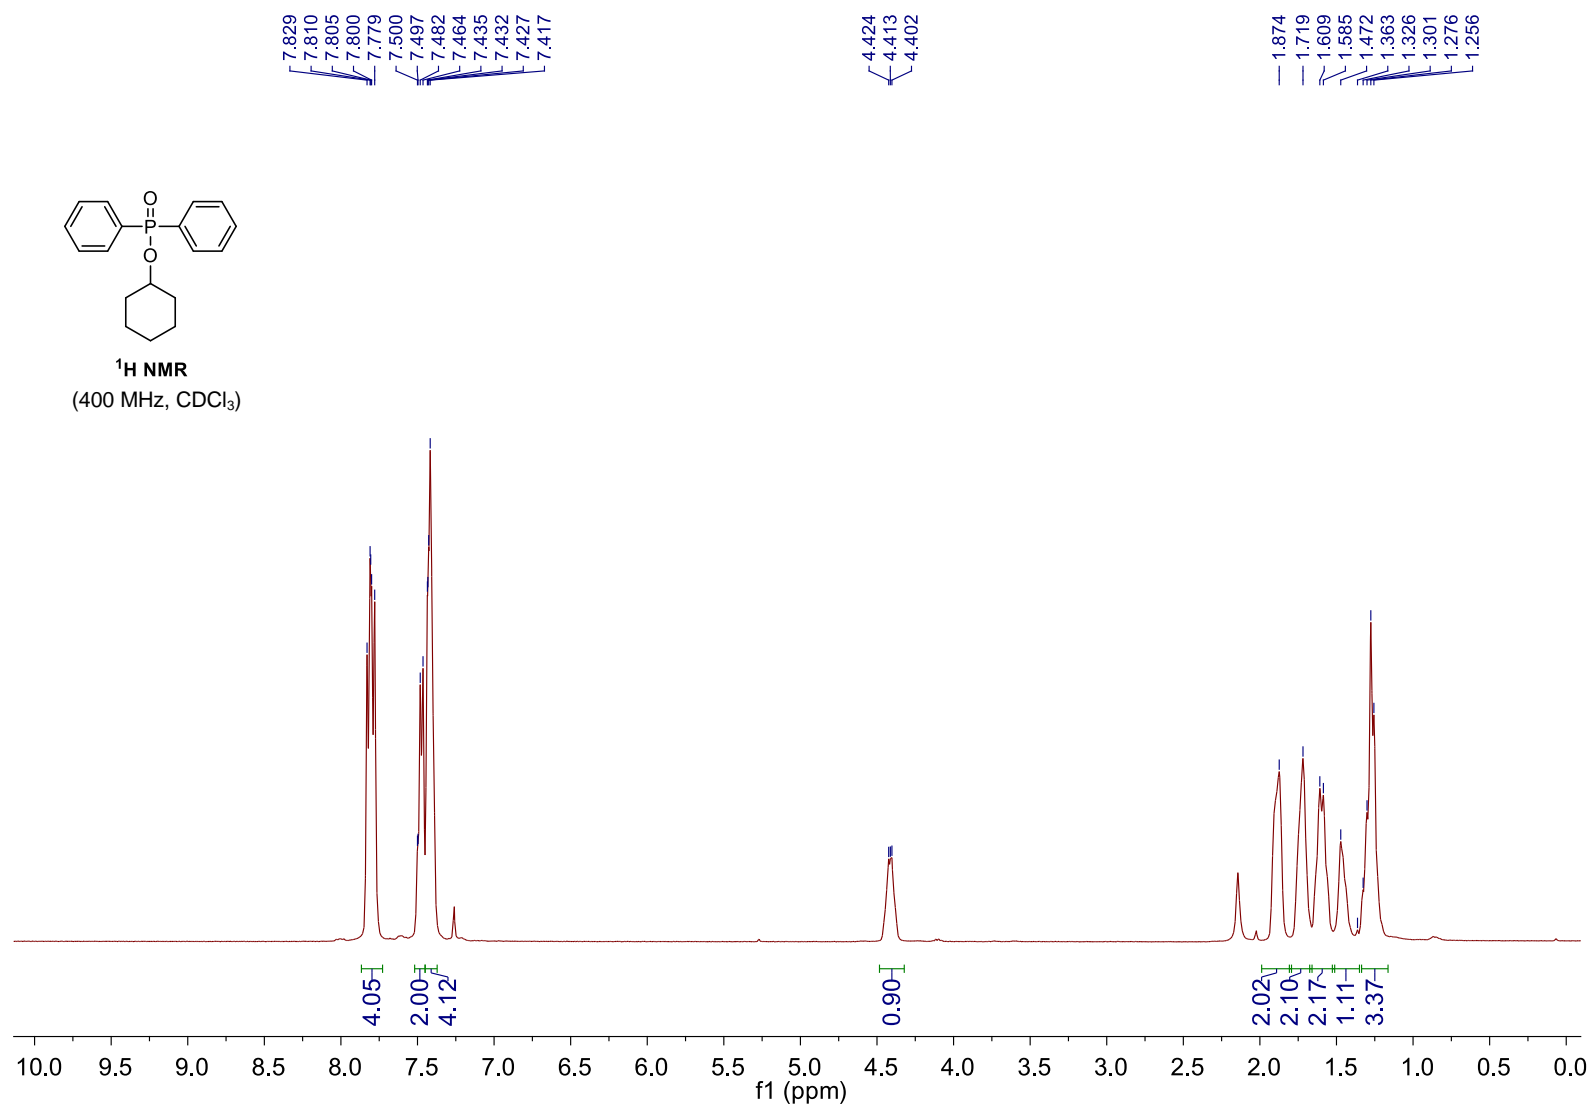

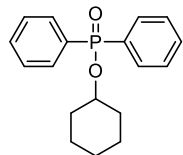

<sup>13</sup>C NMR  
(100 MHz, CDCl<sub>3</sub>)

133.294  
131.929  
131.827  
131.803  
131.587  
131.487  
128.385  
128.255

74.930  
74.869

33.900  
33.865

25.154  
23.517

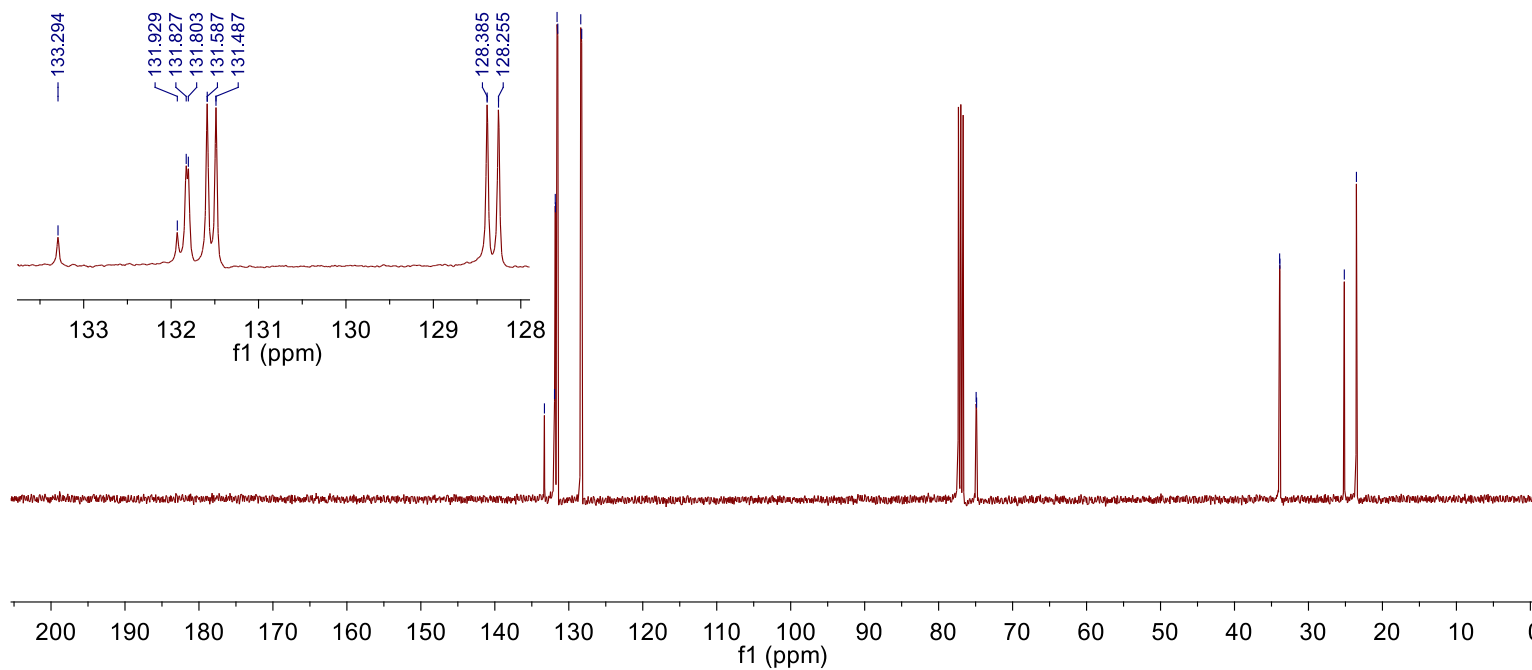

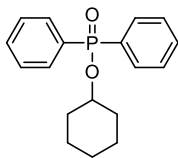

**<sup>31</sup>P NMR**  
(162 MHz, CDCl<sub>3</sub>)

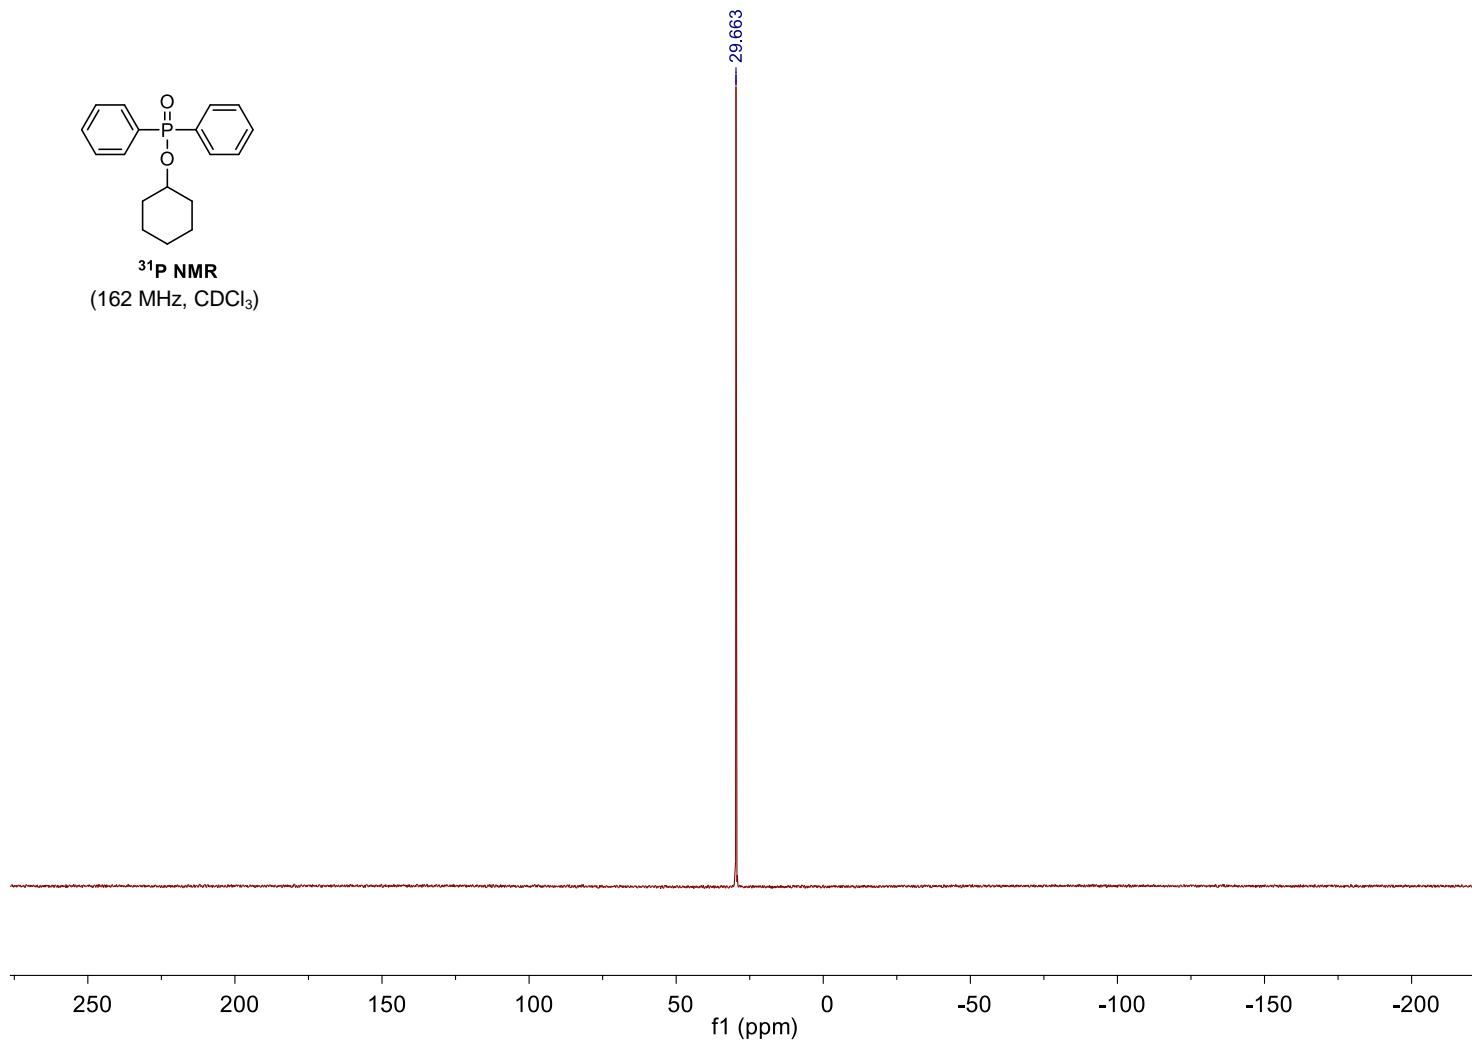

S132

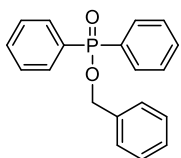

<sup>1</sup>H NMR  
(400 MHz, CDCl<sub>3</sub>)

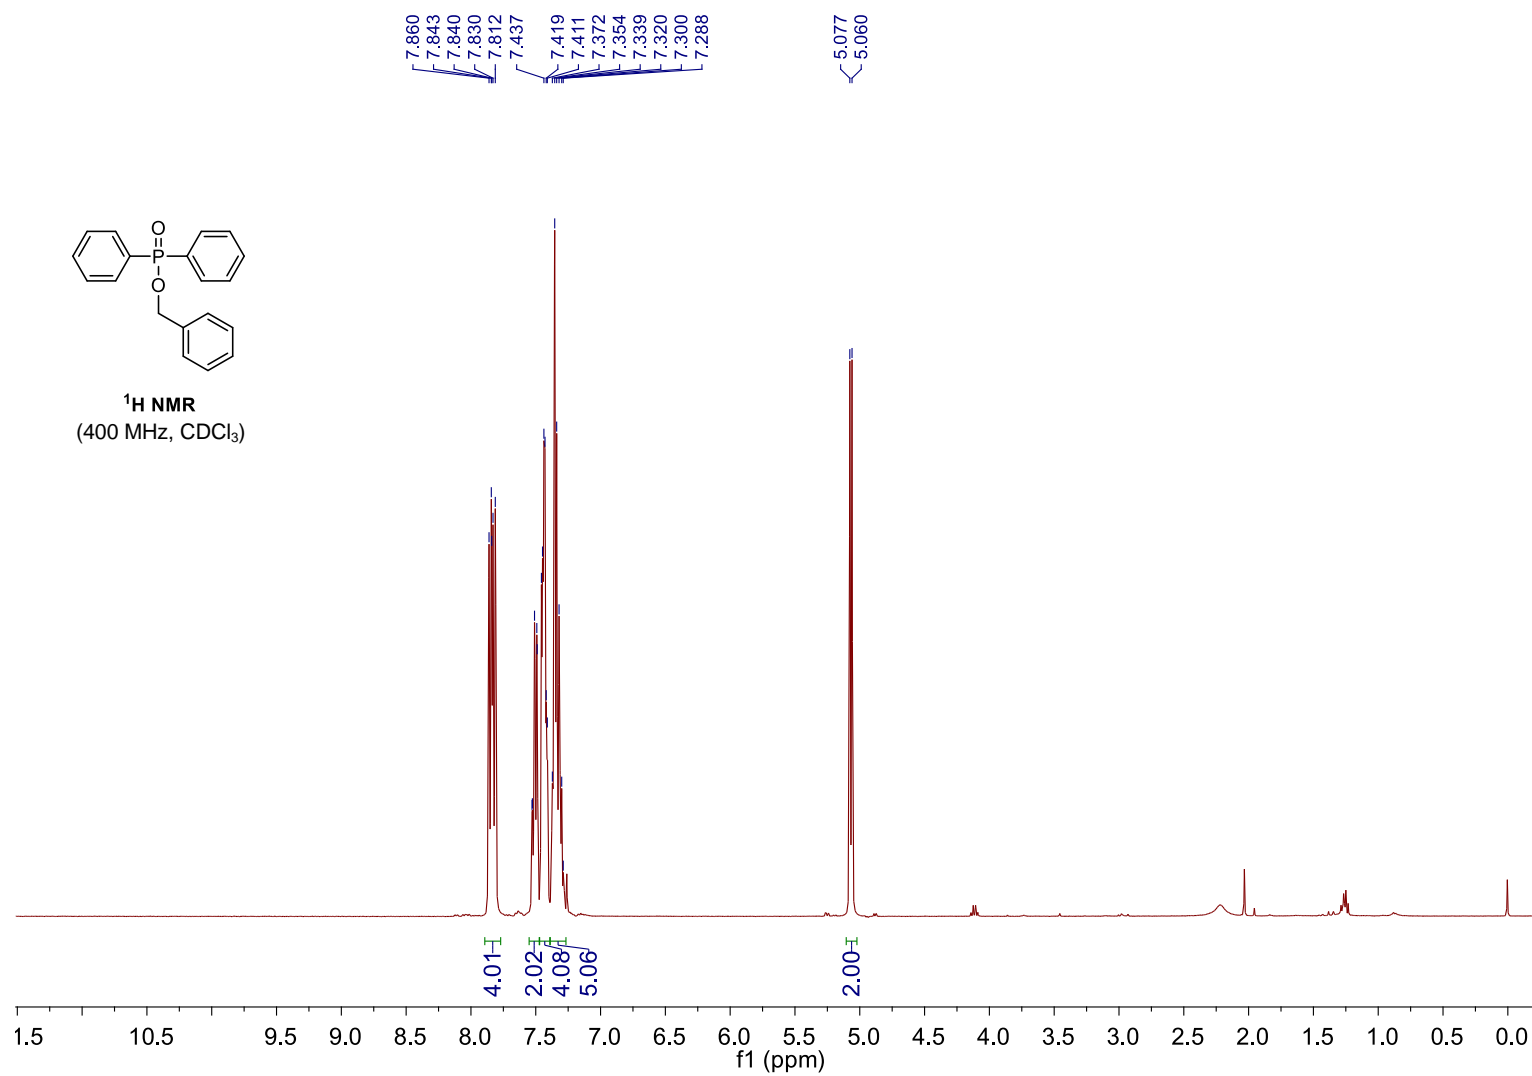

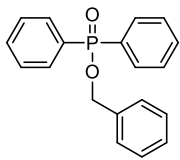

**<sup>13</sup>C NMR**  
(100 MHz, CDCl<sub>3</sub>)

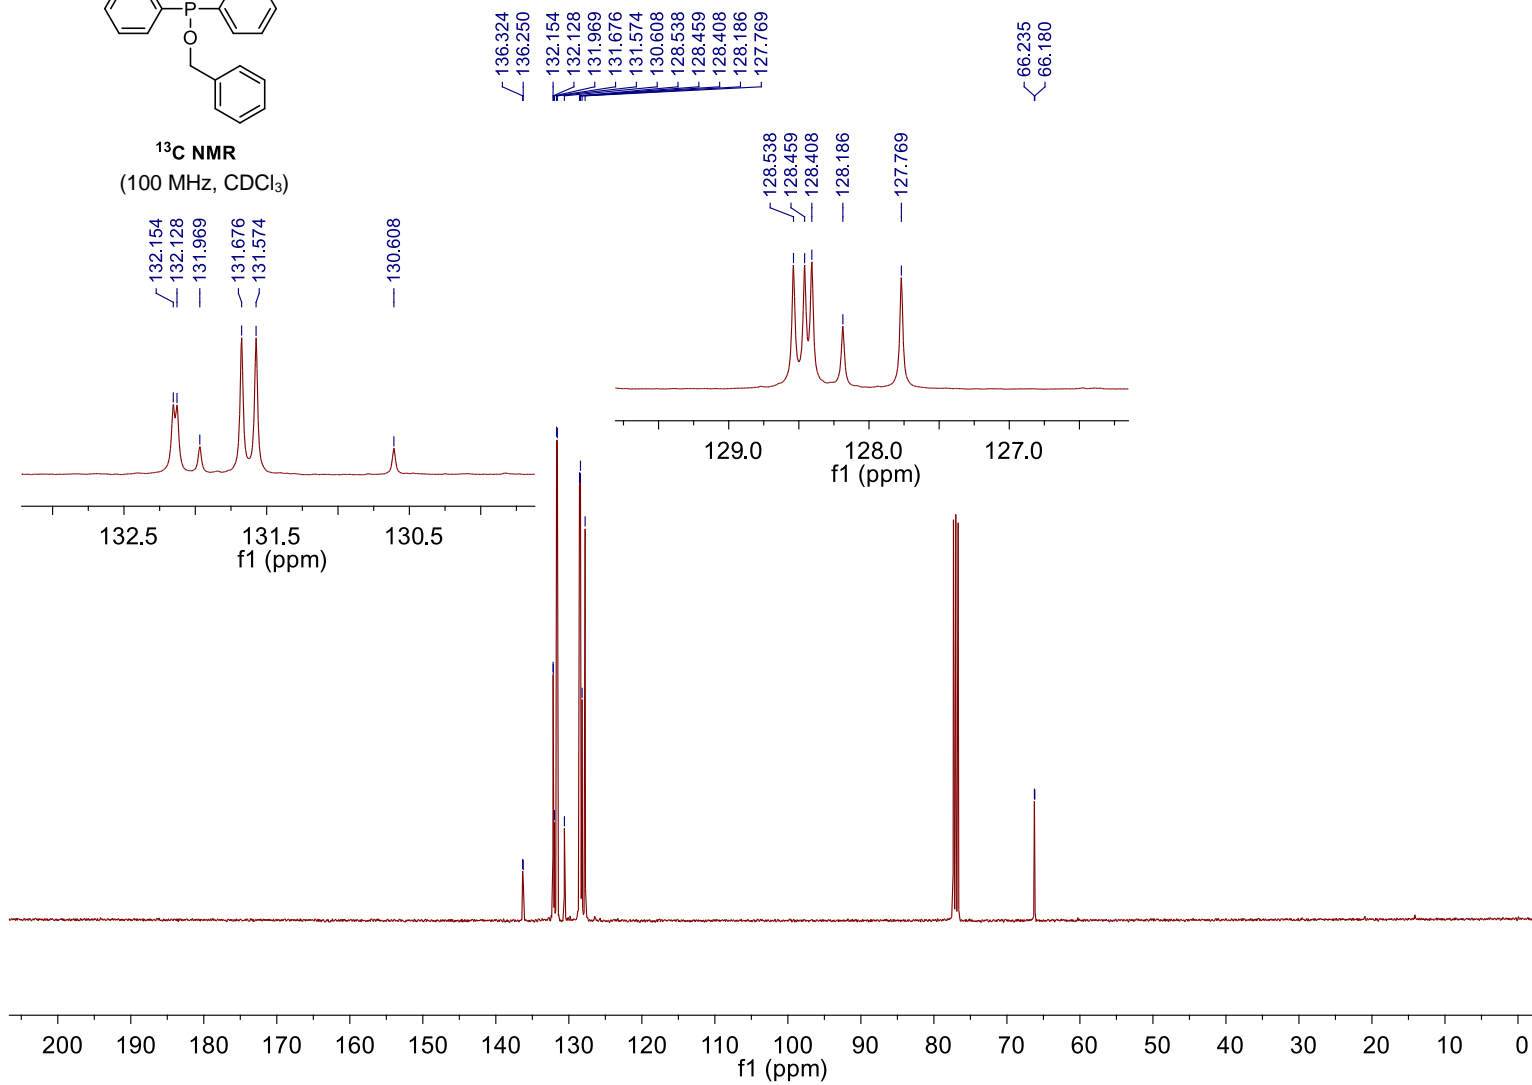

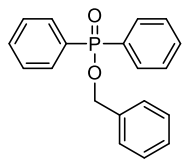

**<sup>31</sup>P NMR**  
(162 MHz, CDCl<sub>3</sub>)

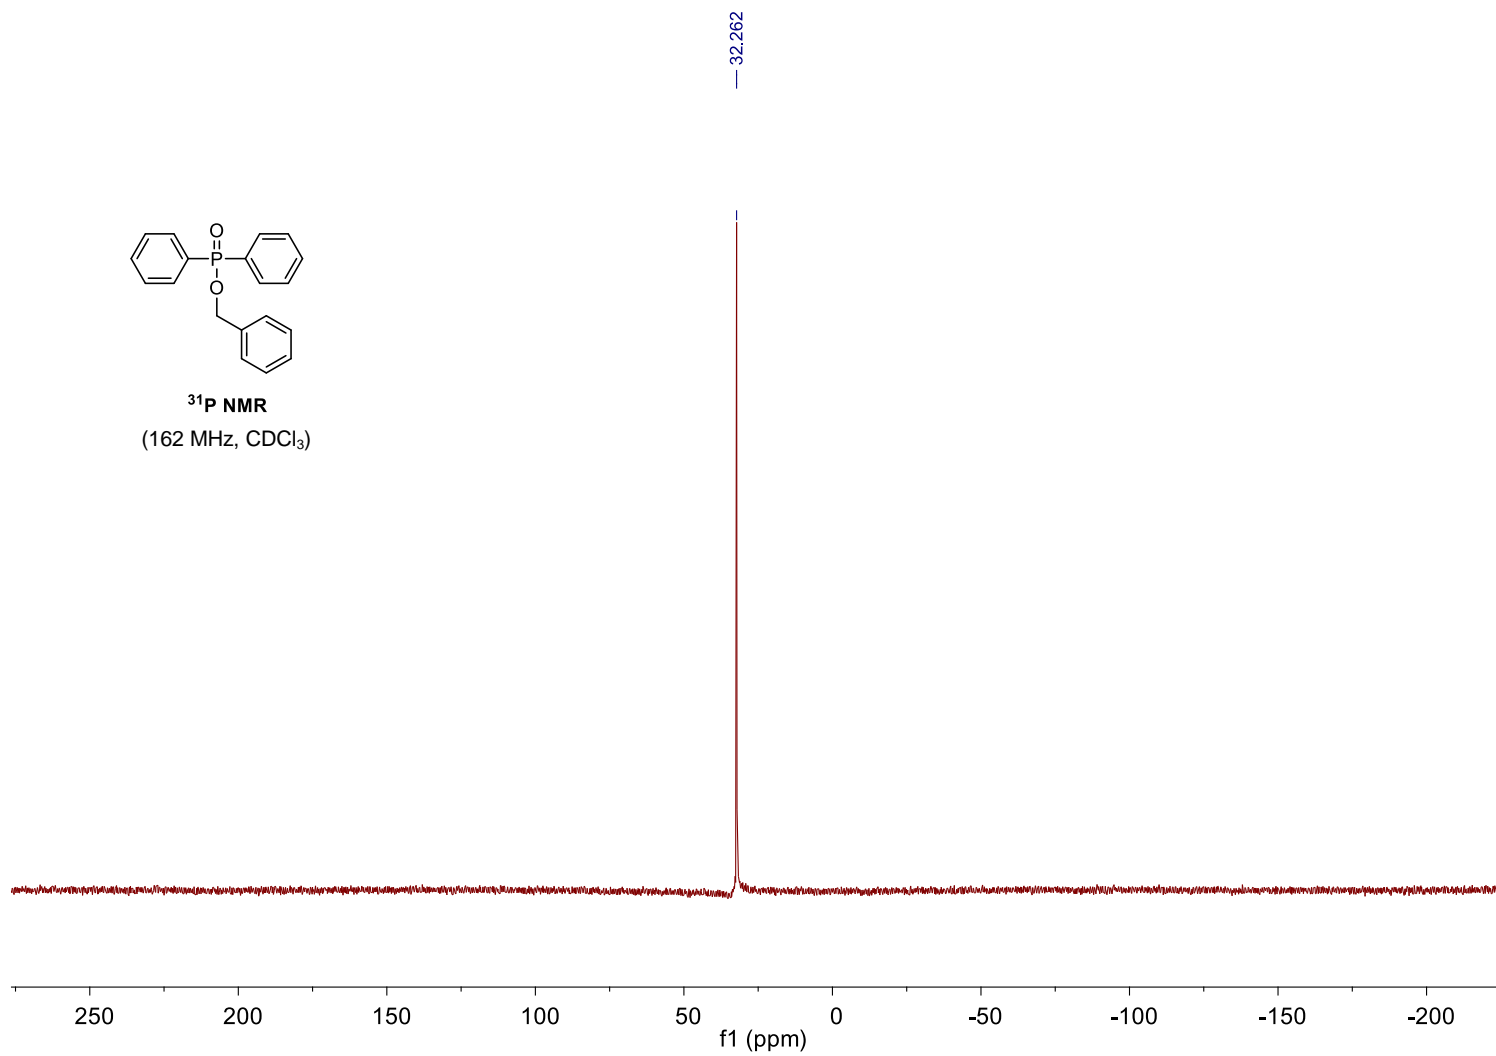

S135

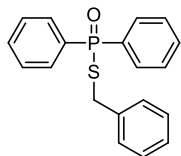

**<sup>1</sup>H NMR**  
(400 MHz, CDCl<sub>3</sub>)

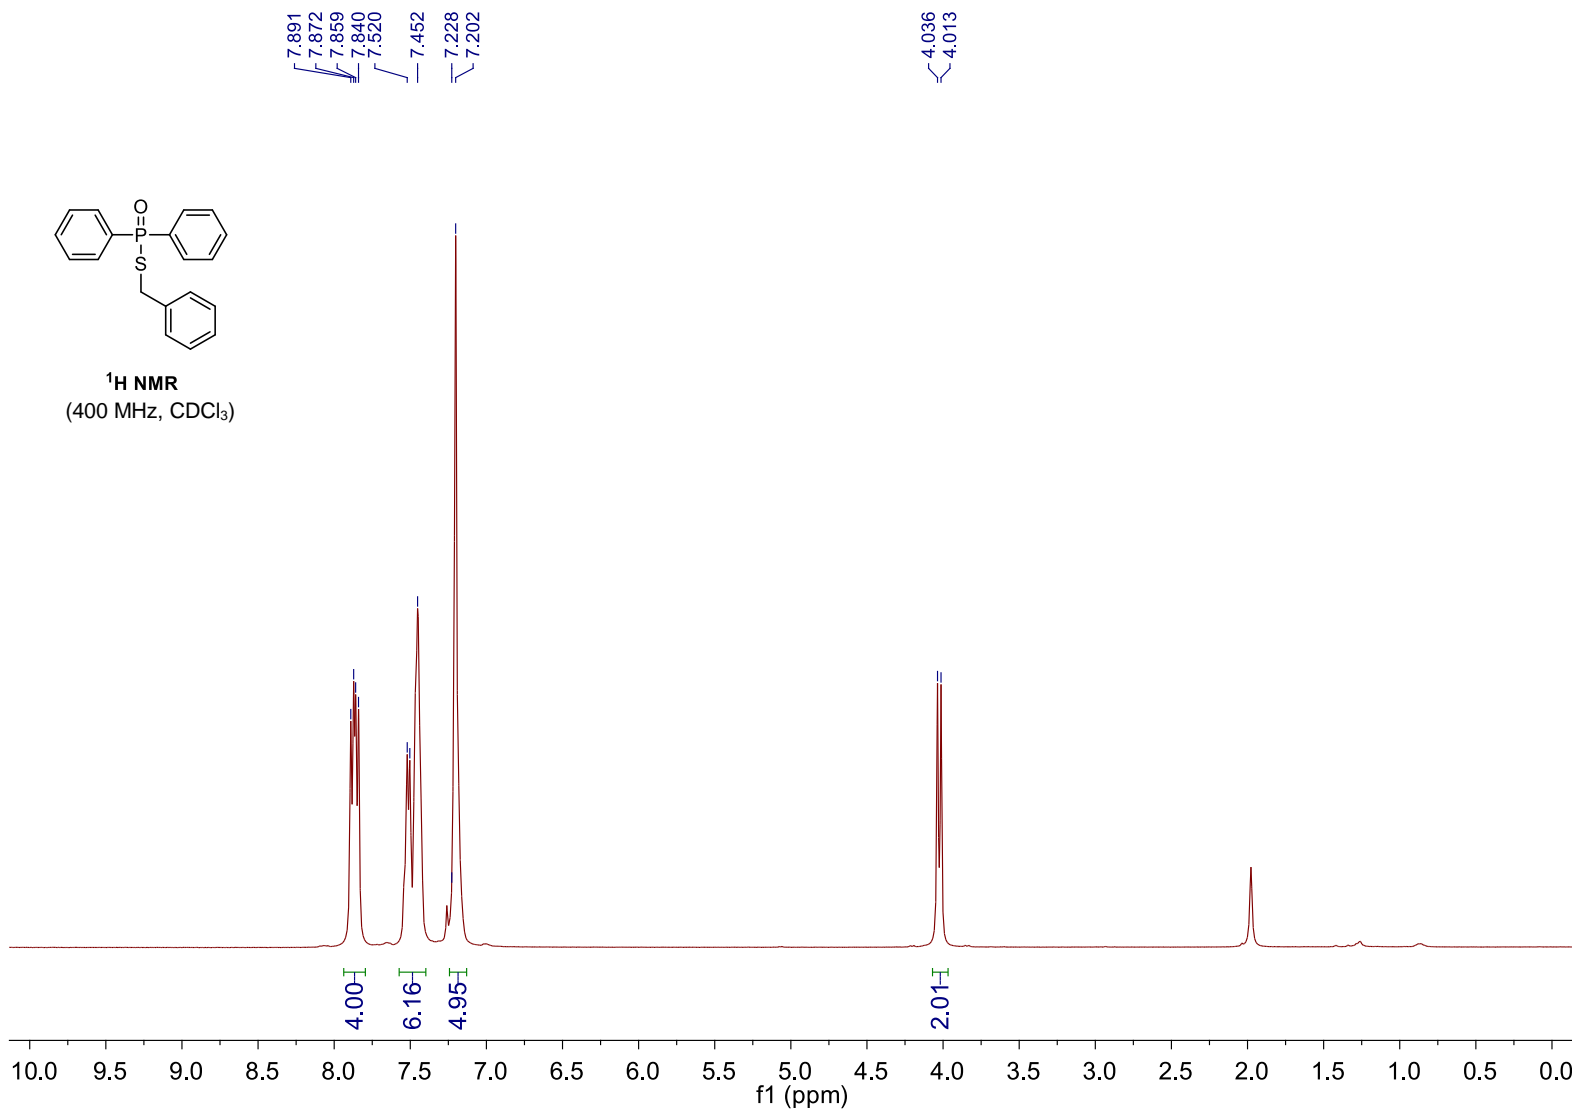



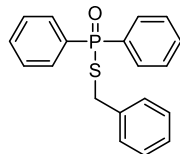

**<sup>13</sup>C NMR**  
(100 MHz, CDCl<sub>3</sub>)

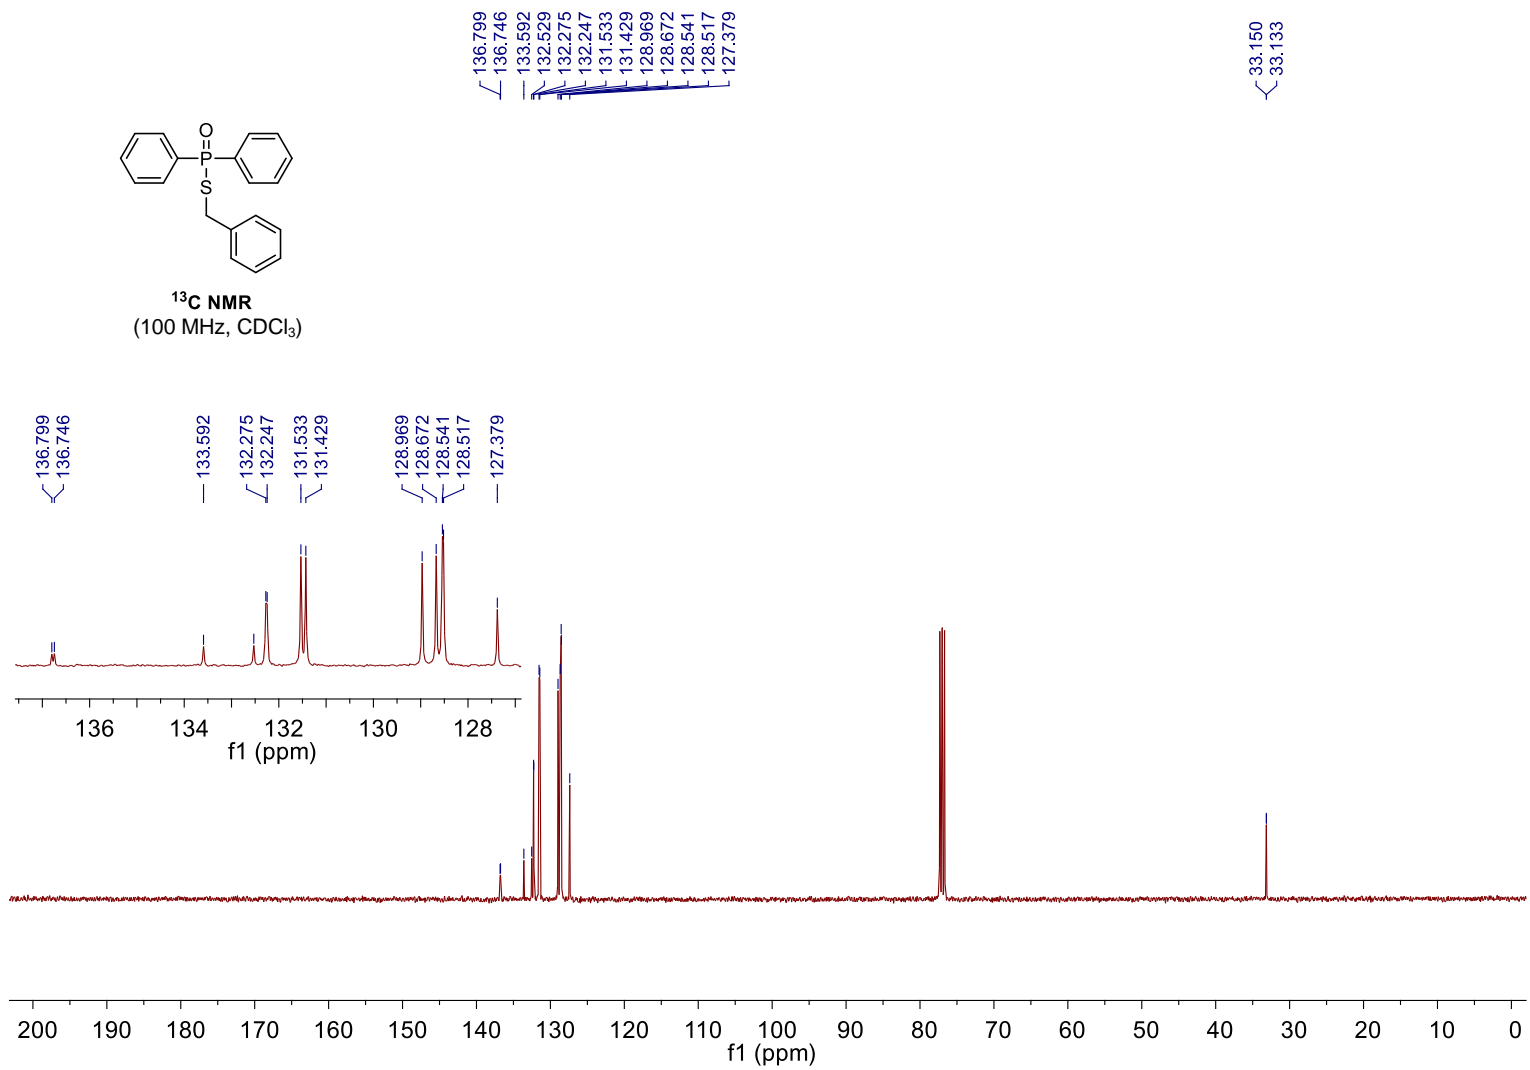

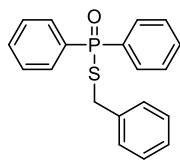

**<sup>31</sup>P NMR**  
(162 MHz, CDCl<sub>3</sub>)

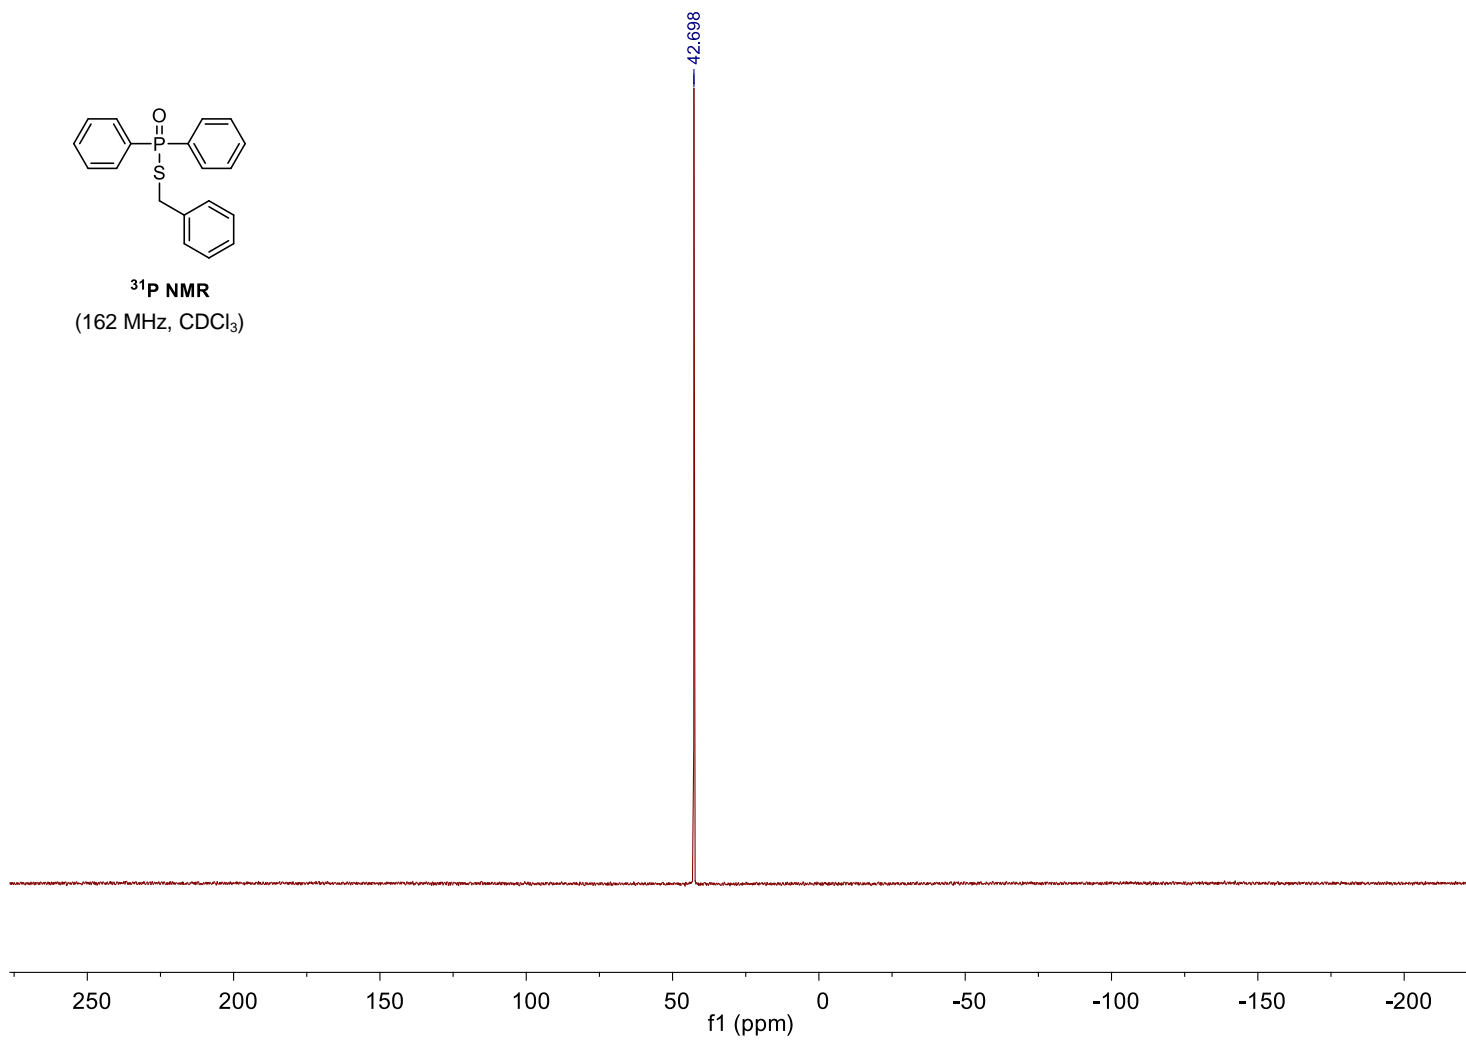

S138

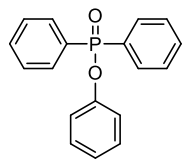

**<sup>1</sup>H NMR**  
(400 MHz, CDCl<sub>3</sub>)

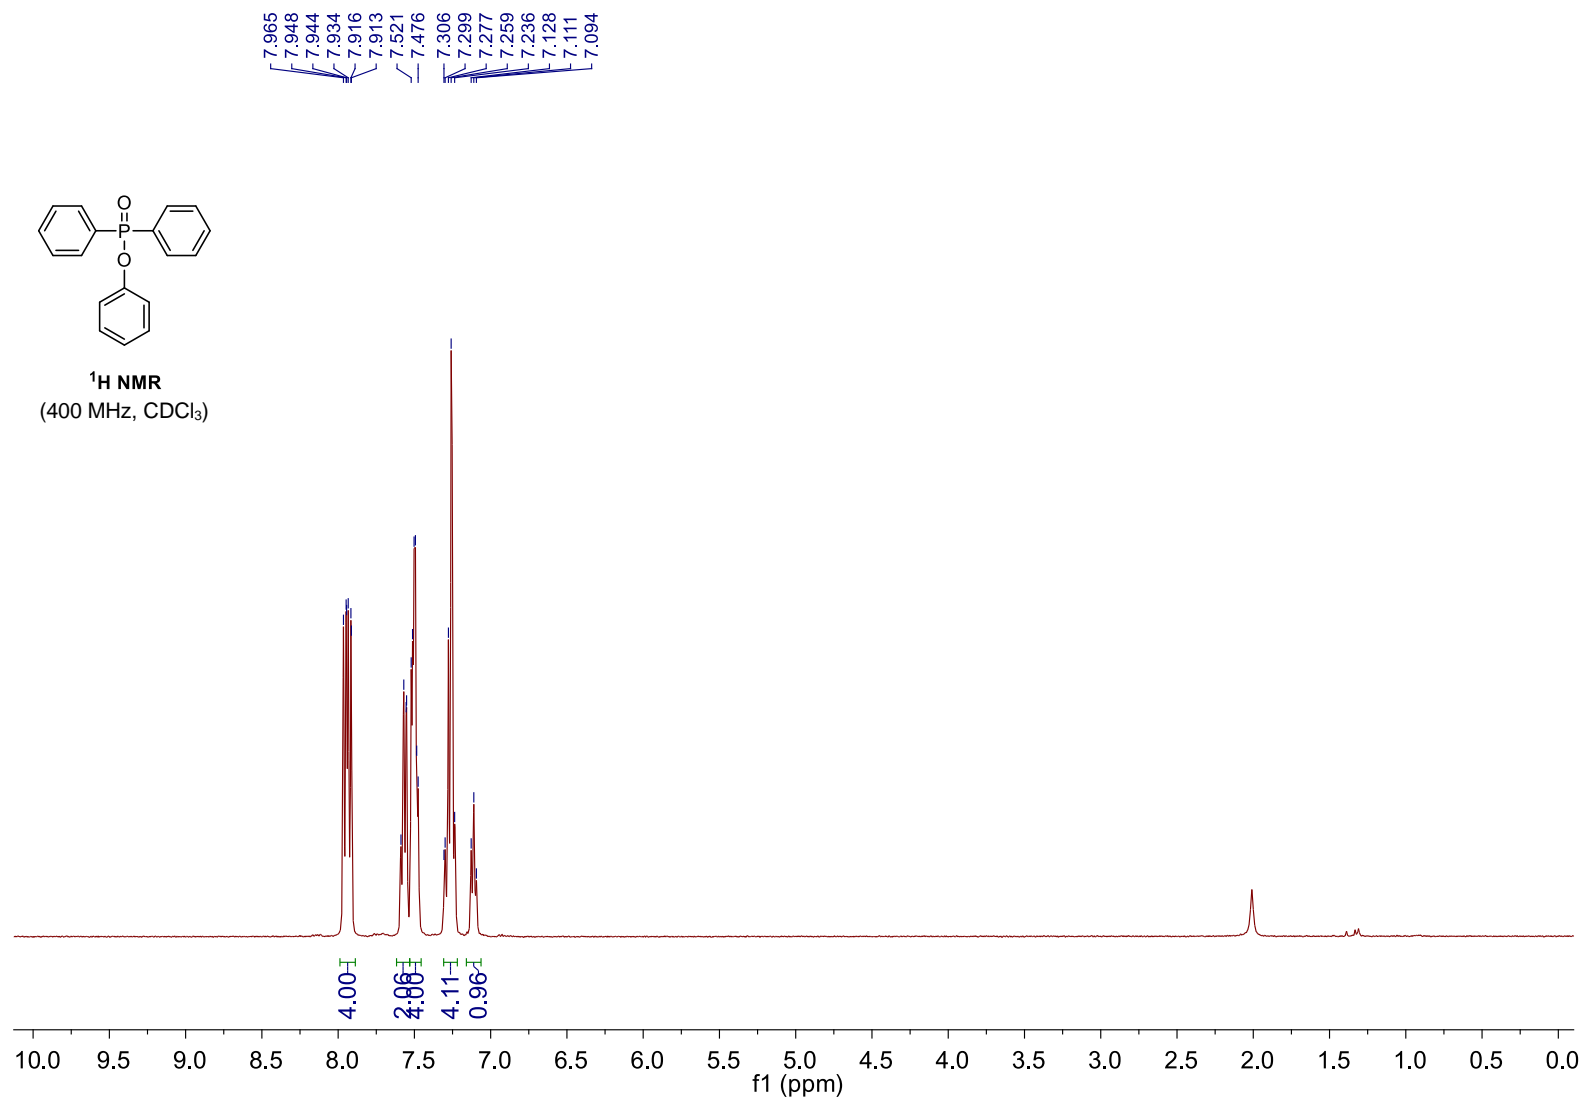

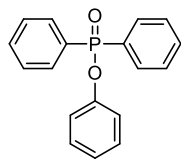

**<sup>13</sup>C NMR**  
(100 MHz, CDCl<sub>3</sub>)

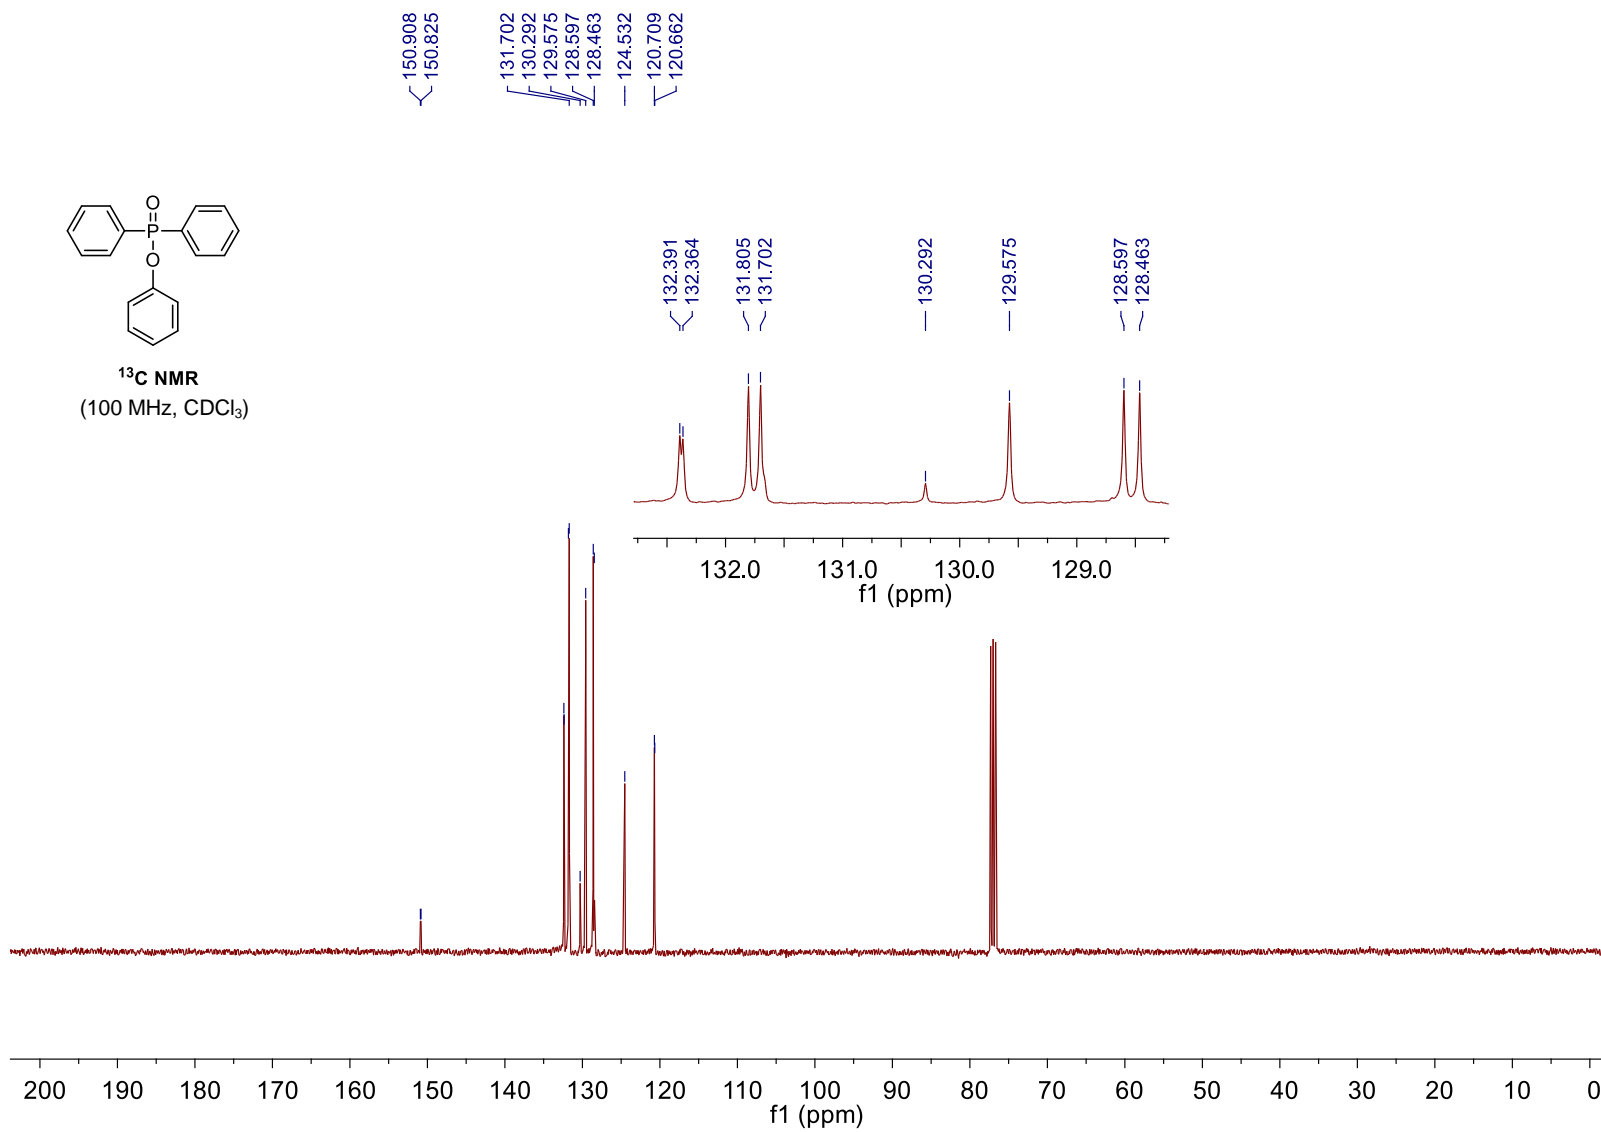

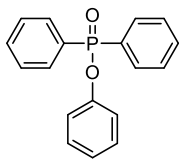

**<sup>31</sup>P NMR**  
(162 MHz, CDCl<sub>3</sub>)

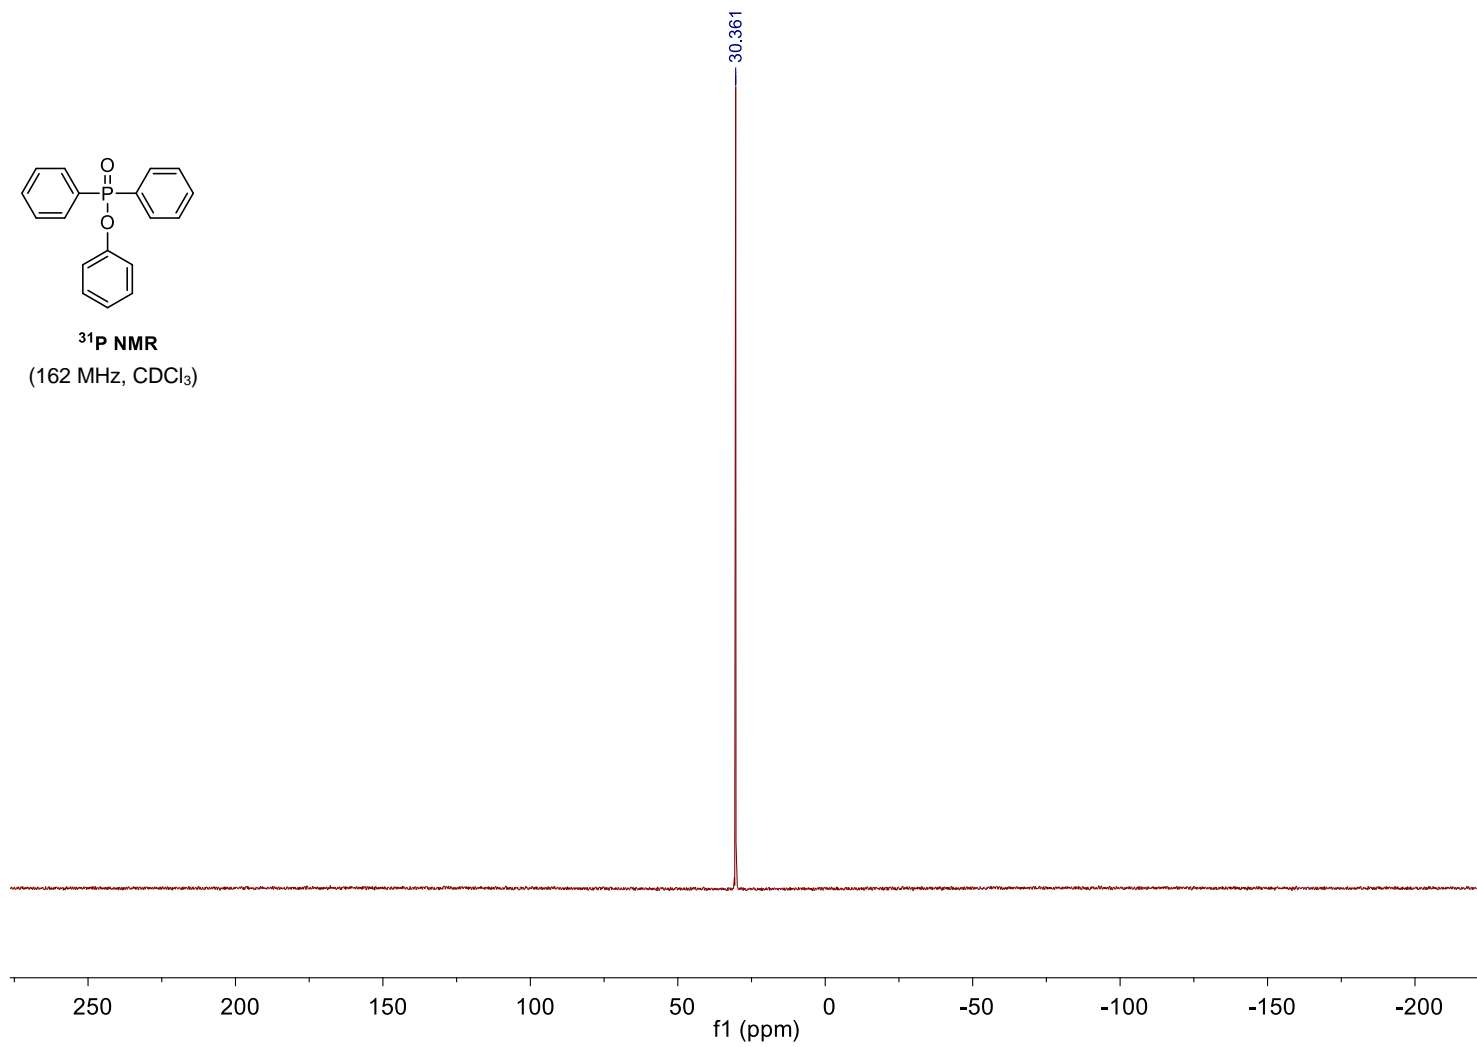

S141

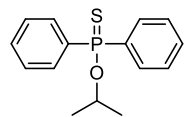

**<sup>1</sup>H NMR**  
(400 MHz, CDCl<sub>3</sub>)

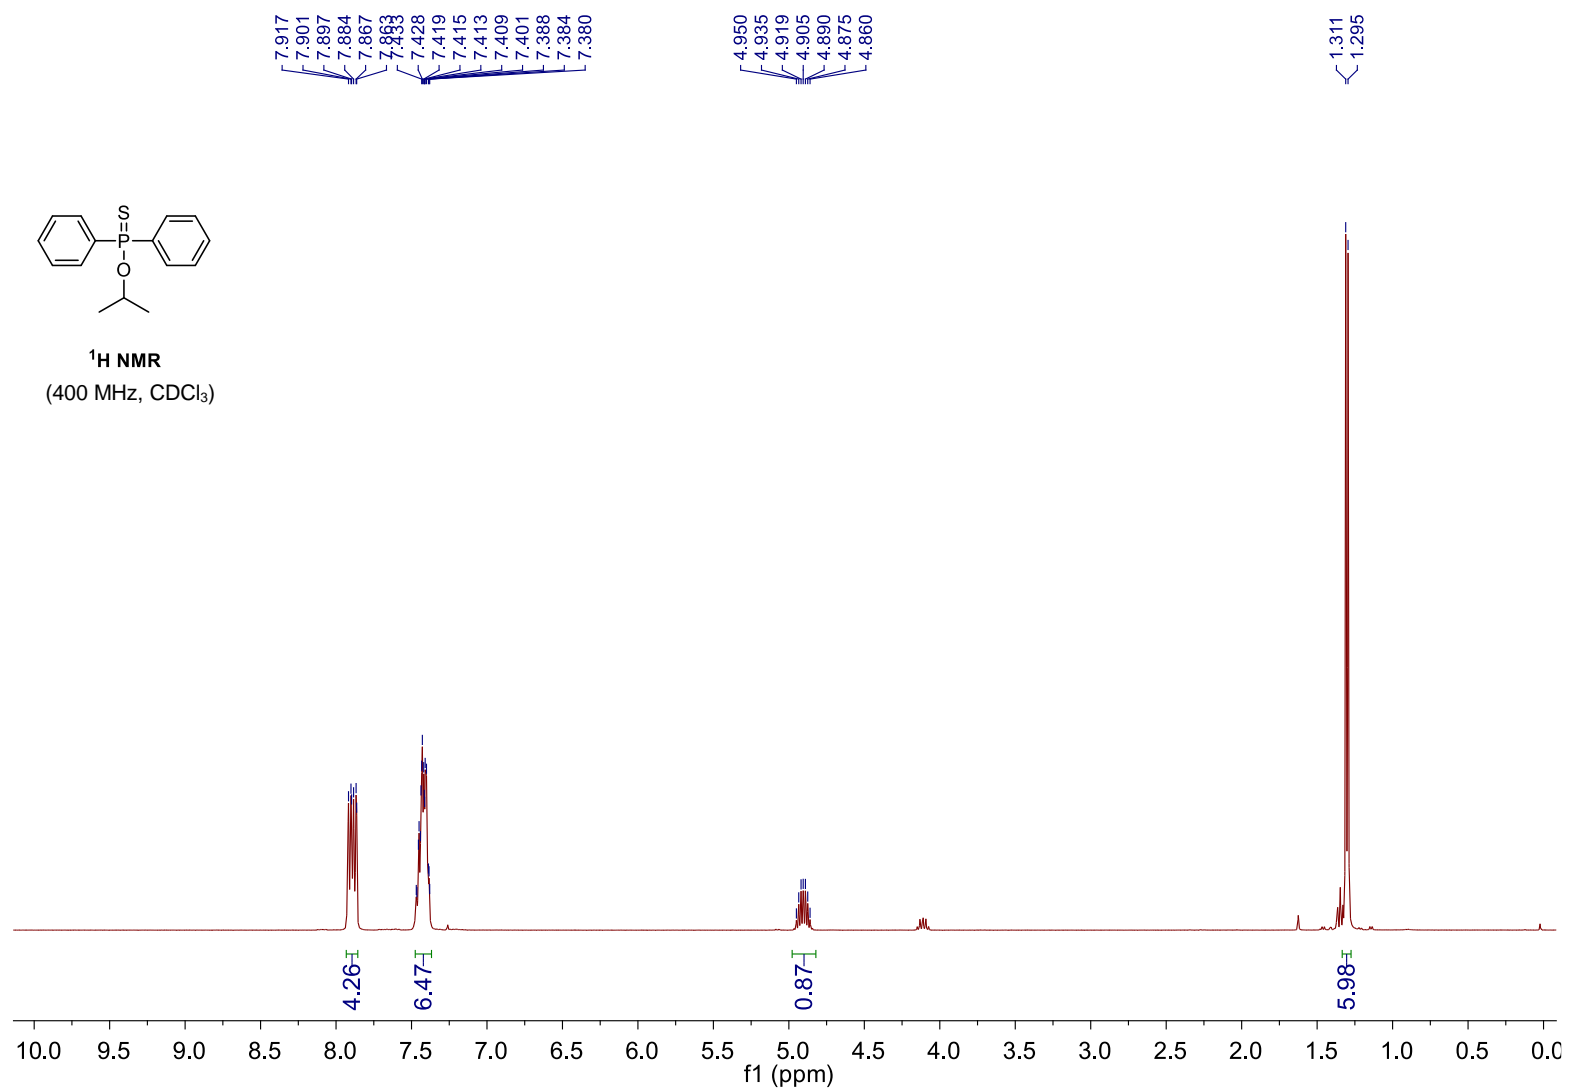

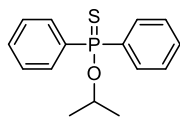

<sup>13</sup>C NMR  
(100 MHz, CDCl<sub>3</sub>)

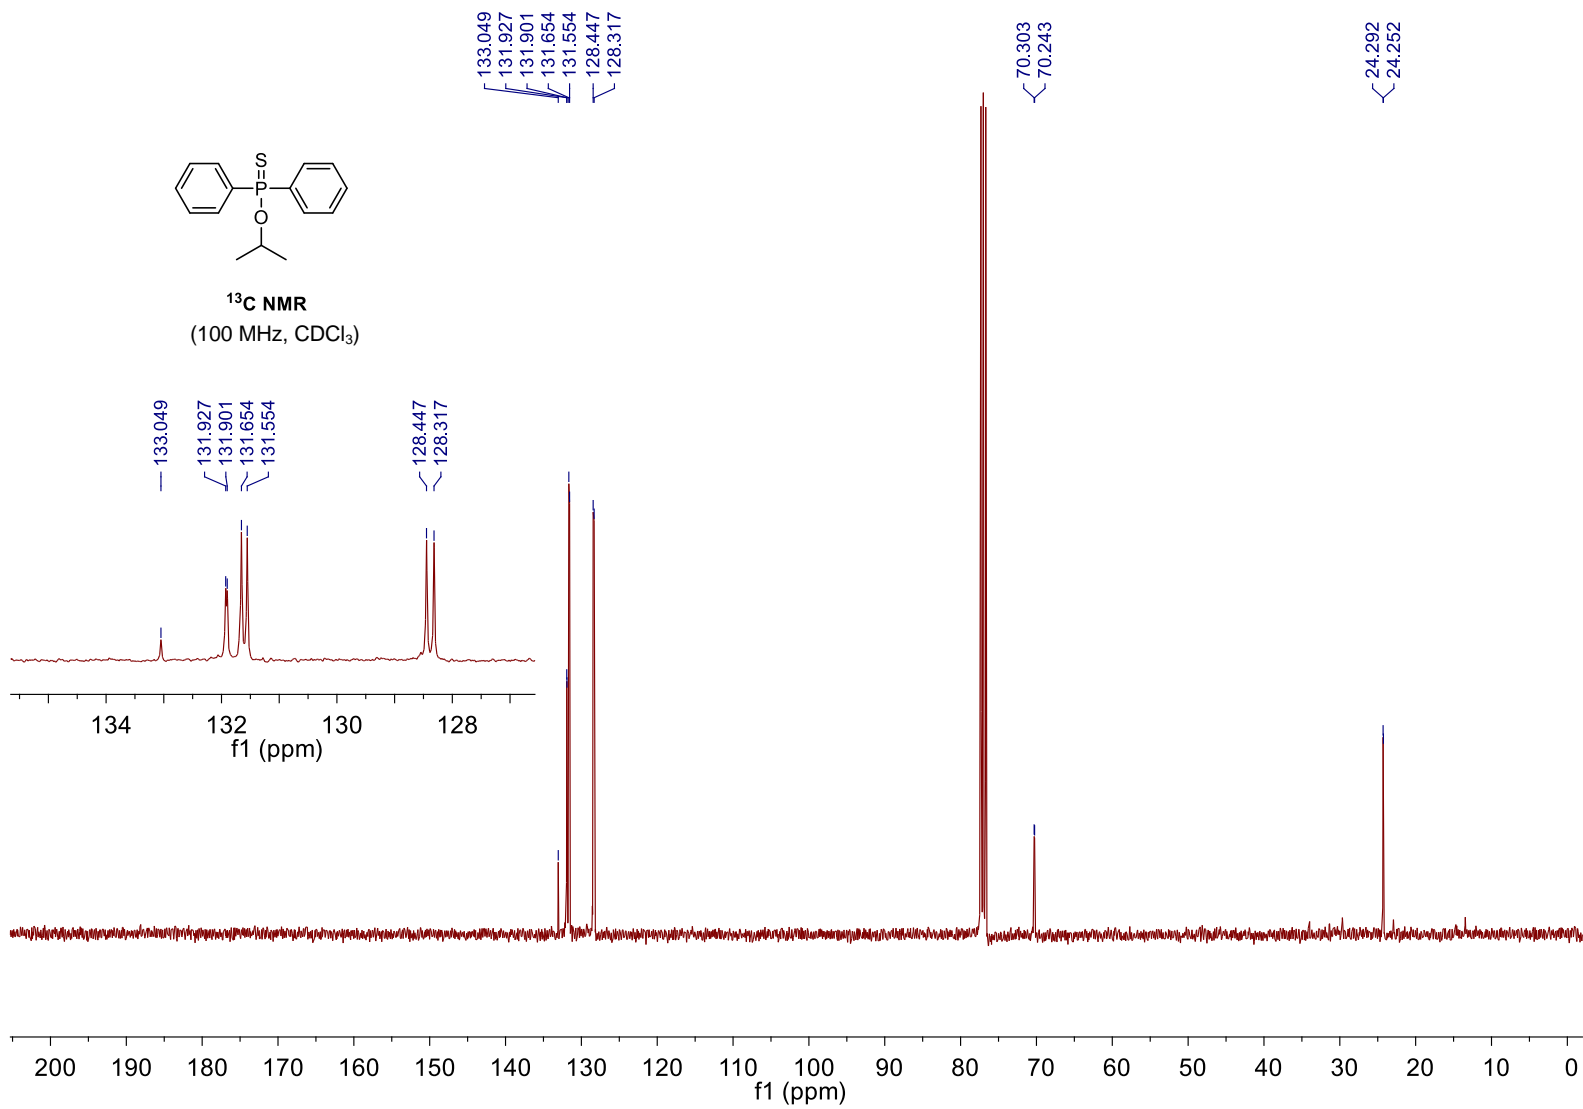

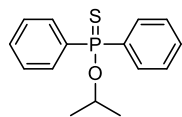

**<sup>31</sup>P NMR**  
(162 MHz, CDCl<sub>3</sub>)

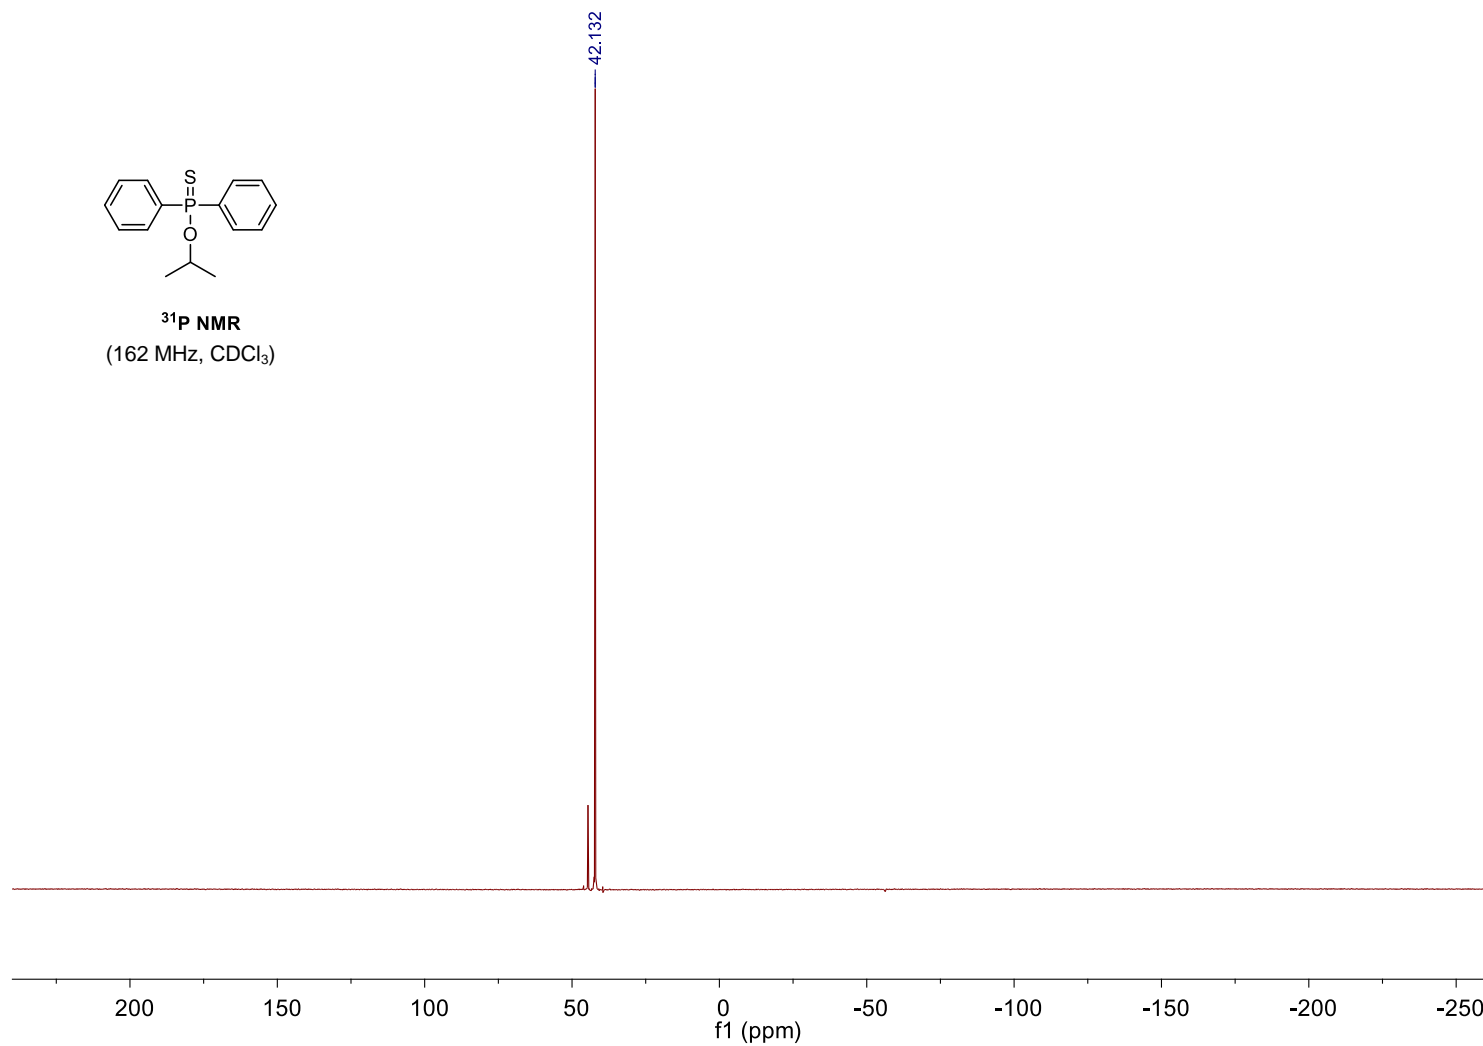



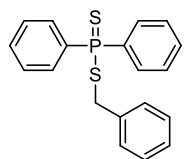

**<sup>1</sup>H NMR**  
(400 MHz, CDCl<sub>3</sub>)

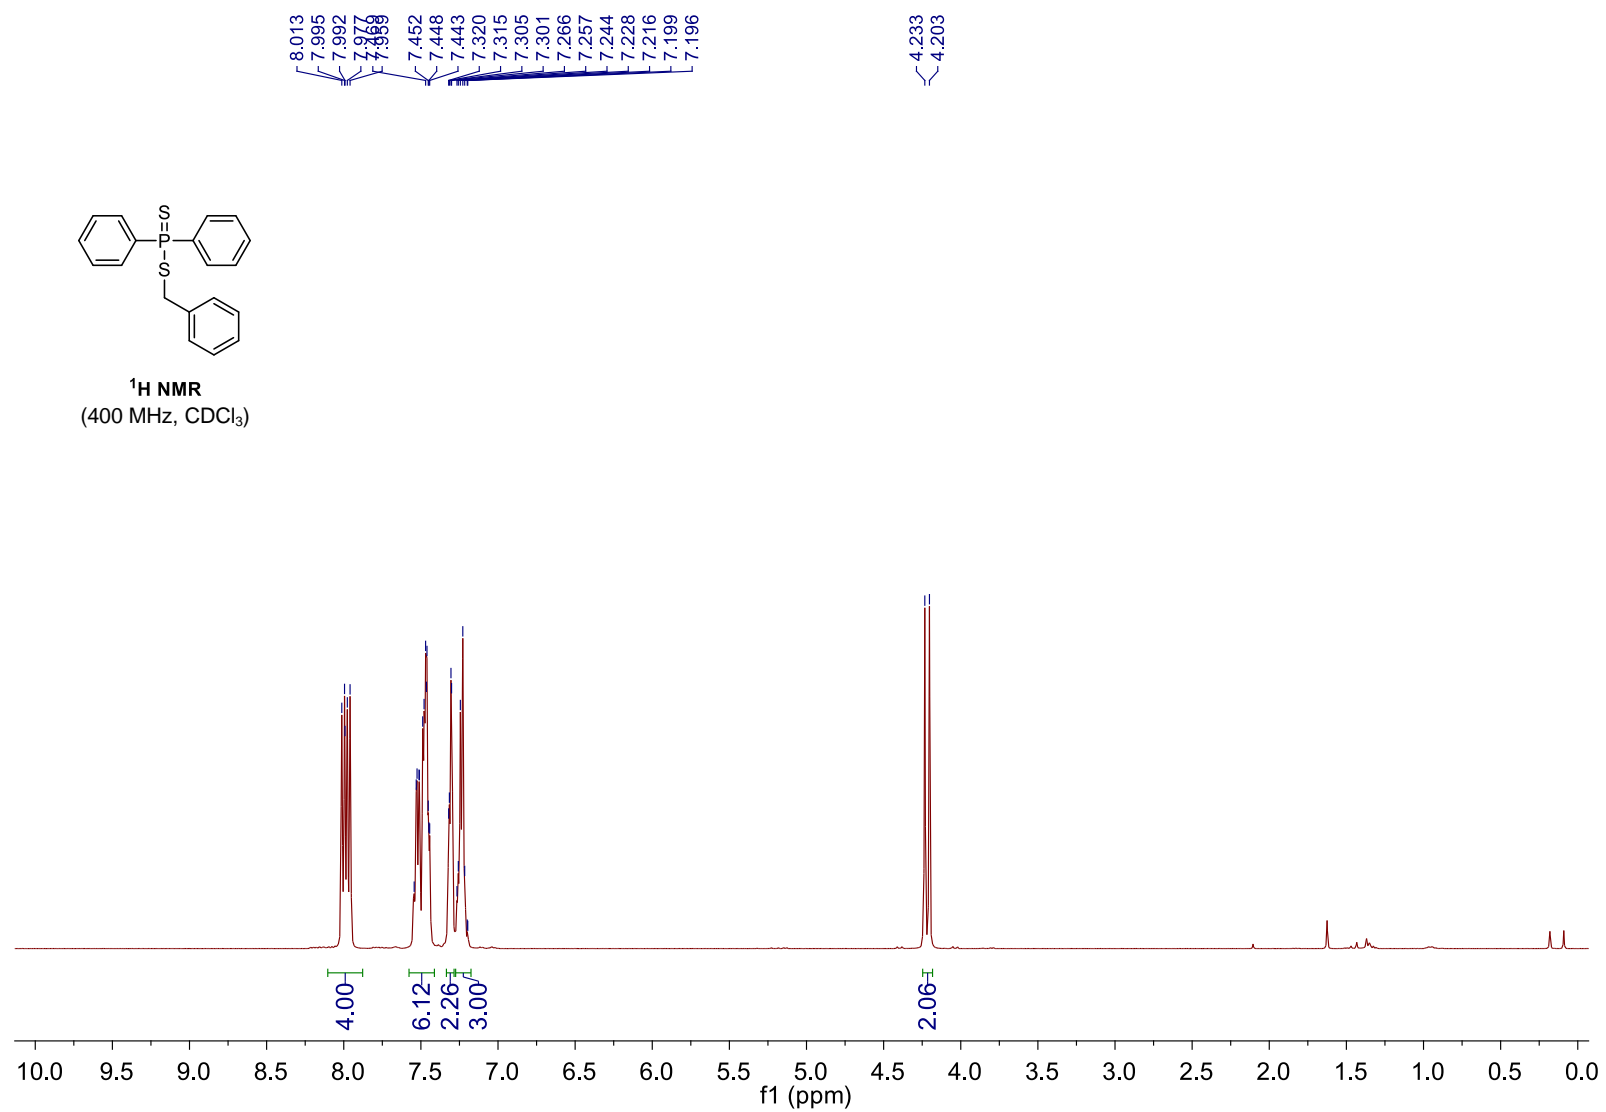

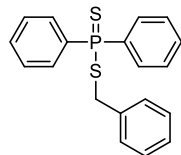

**<sup>13</sup>C NMR**  
(100 MHz, CDCl<sub>3</sub>)

136.715  
136.658  
134.555  
133.711  
131.873  
131.843  
131.546  
131.433  
129.294  
128.625  
128.533  
128.492  
127.440

35.866  
35.852

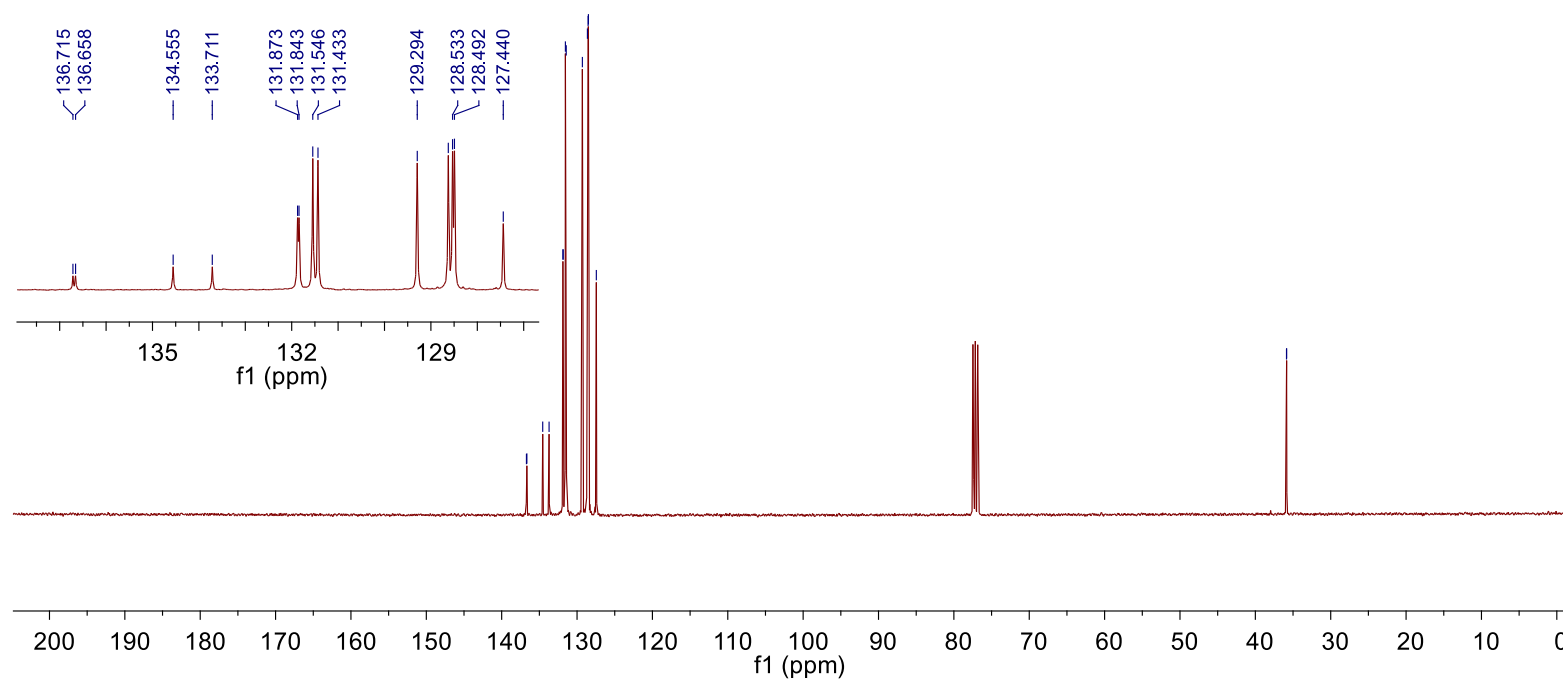

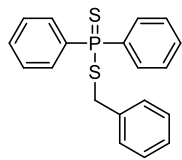

**<sup>31</sup>P NMR**  
(162 MHz, CDCl<sub>3</sub>)

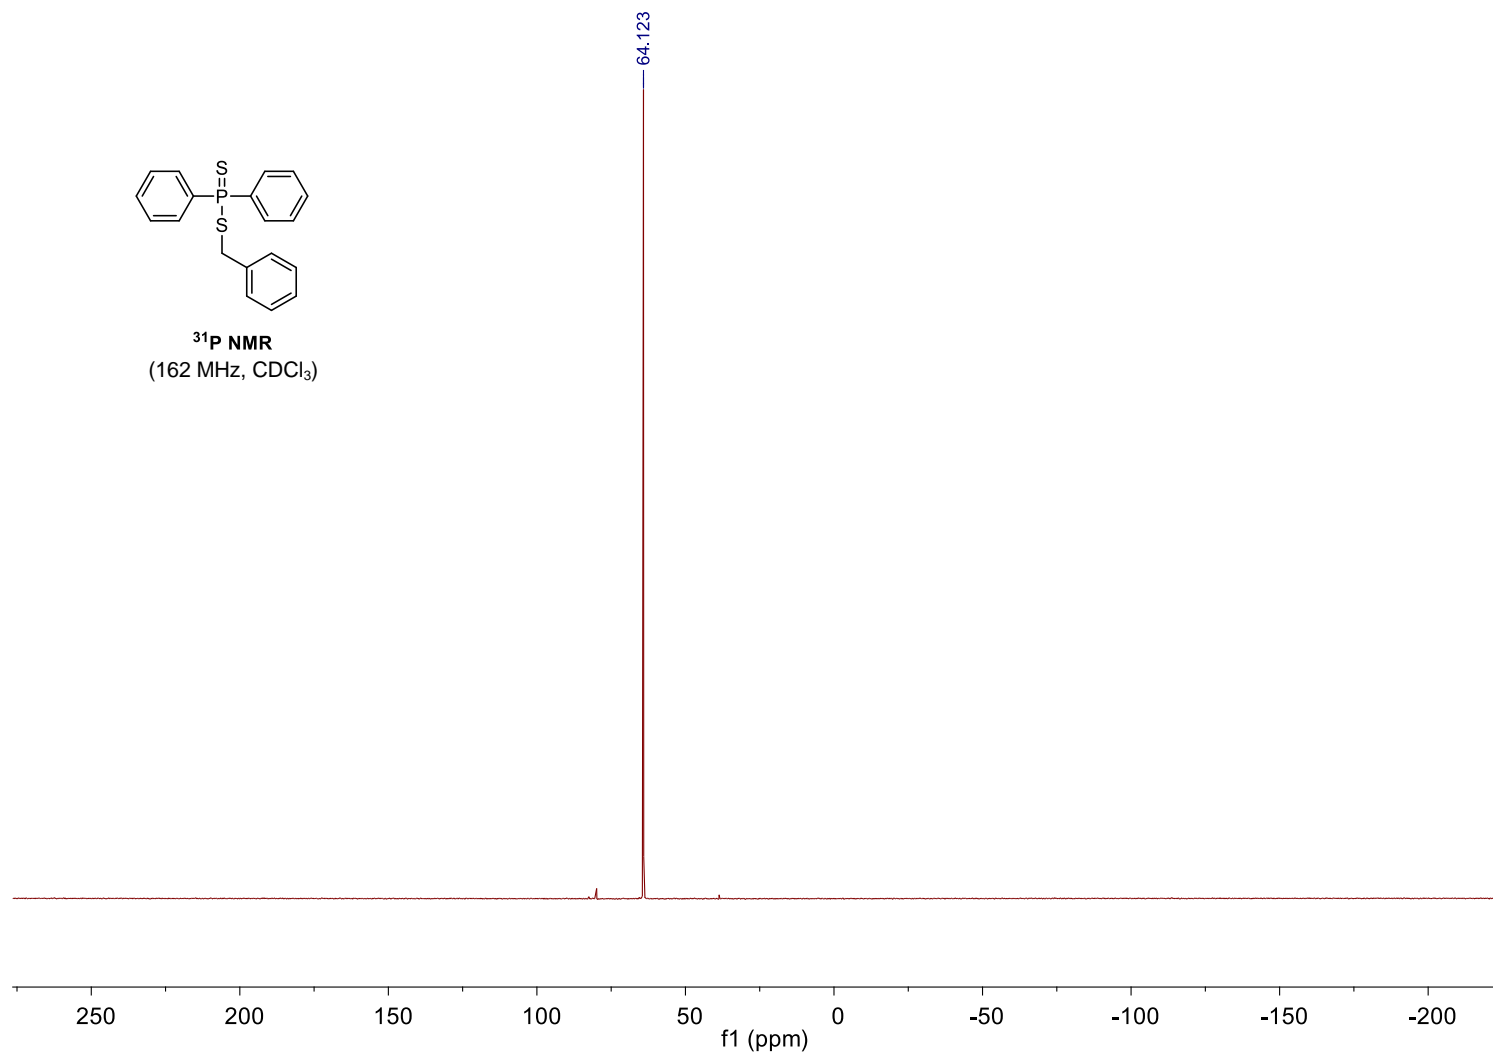

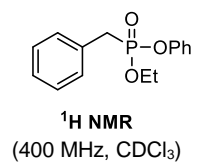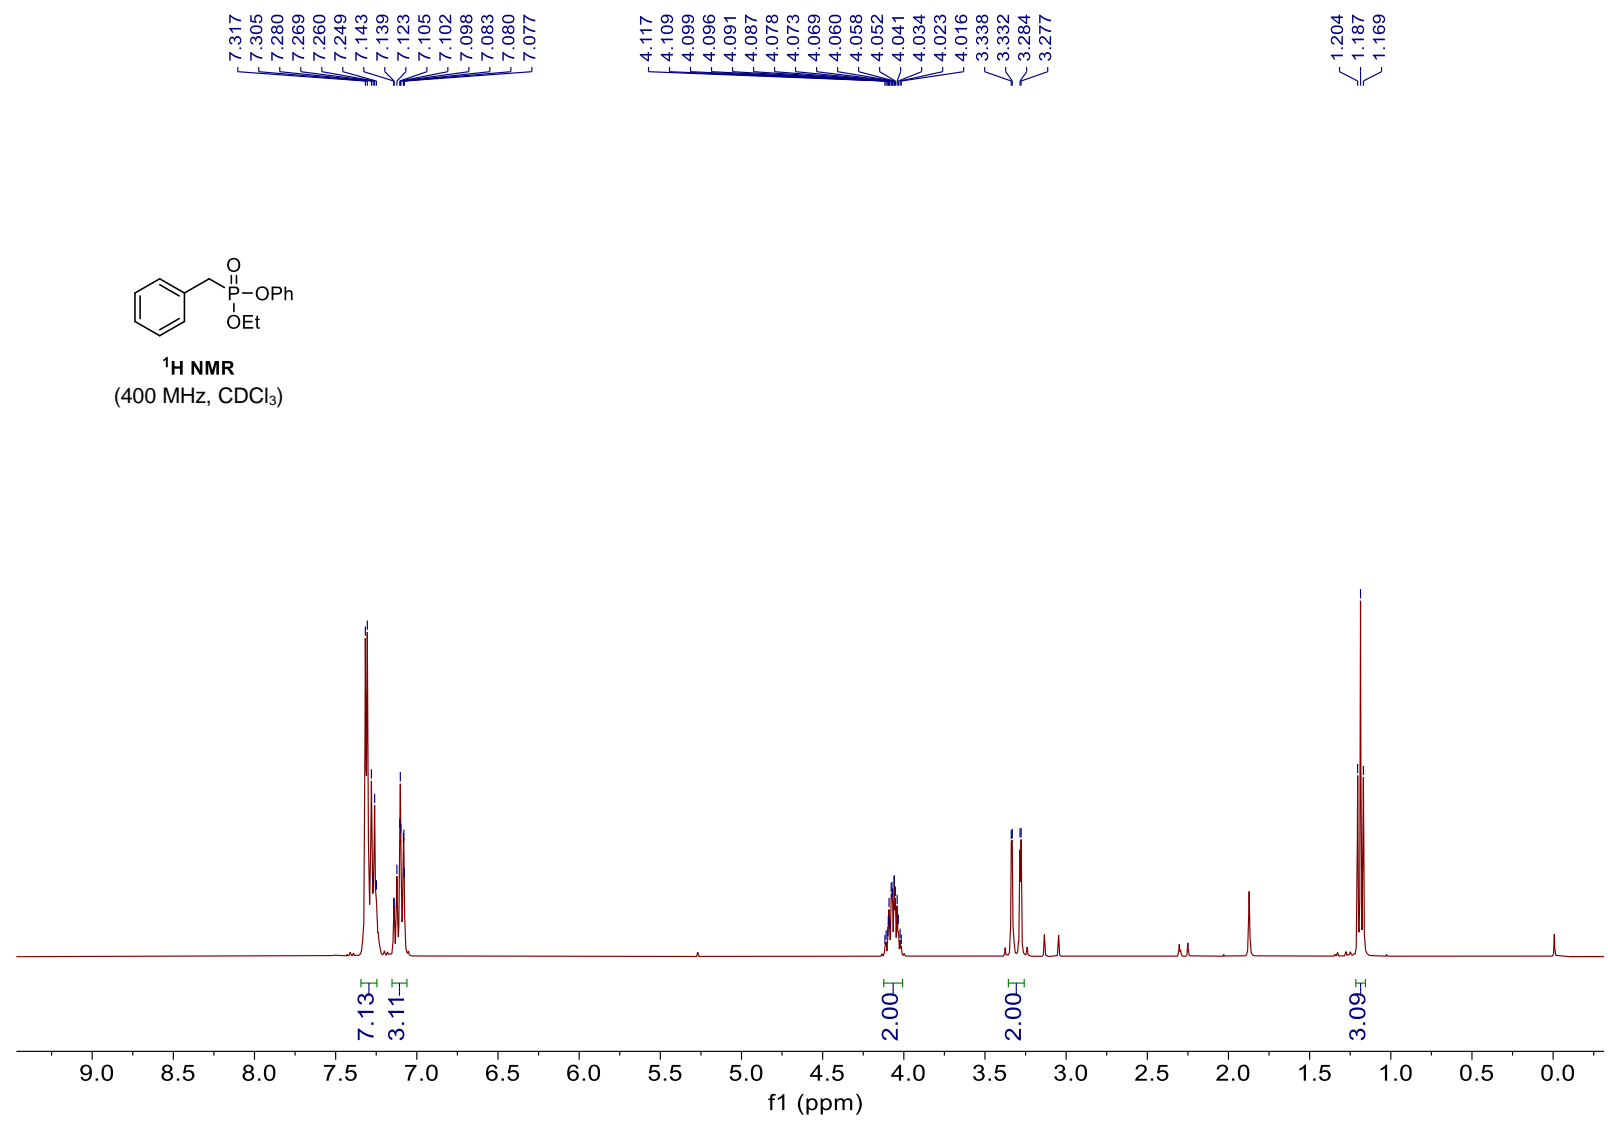

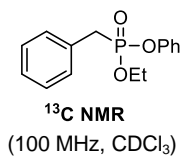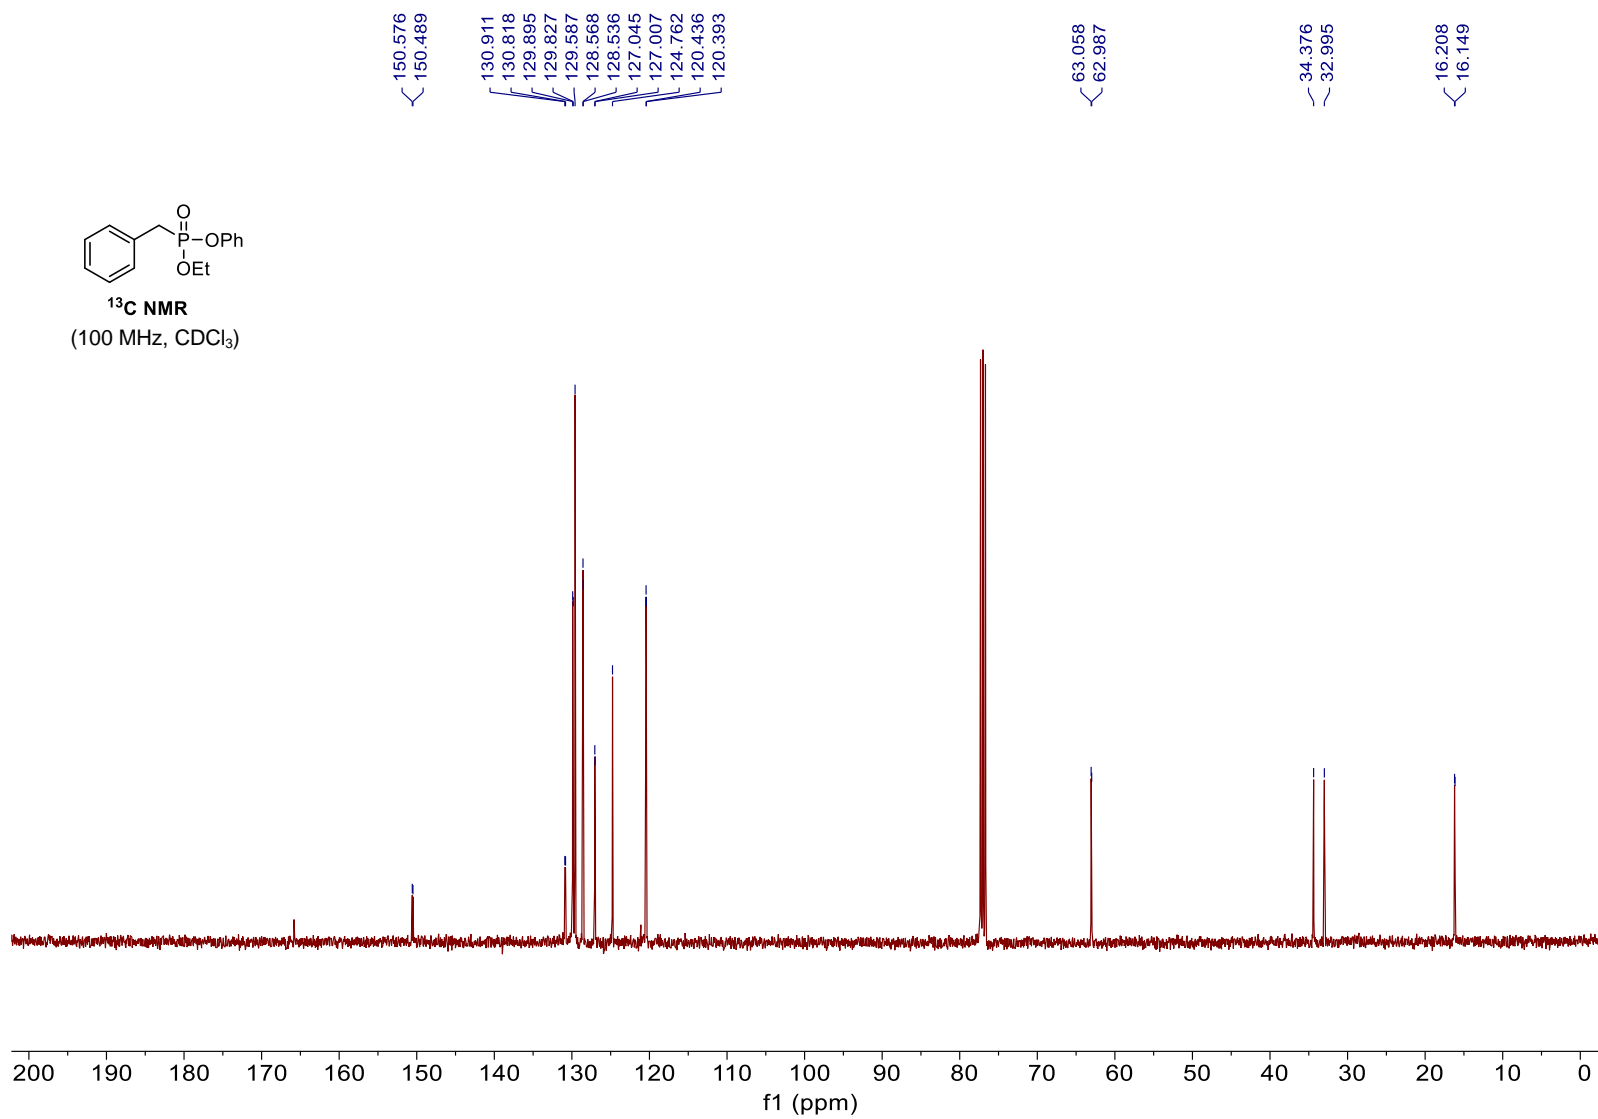

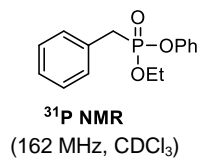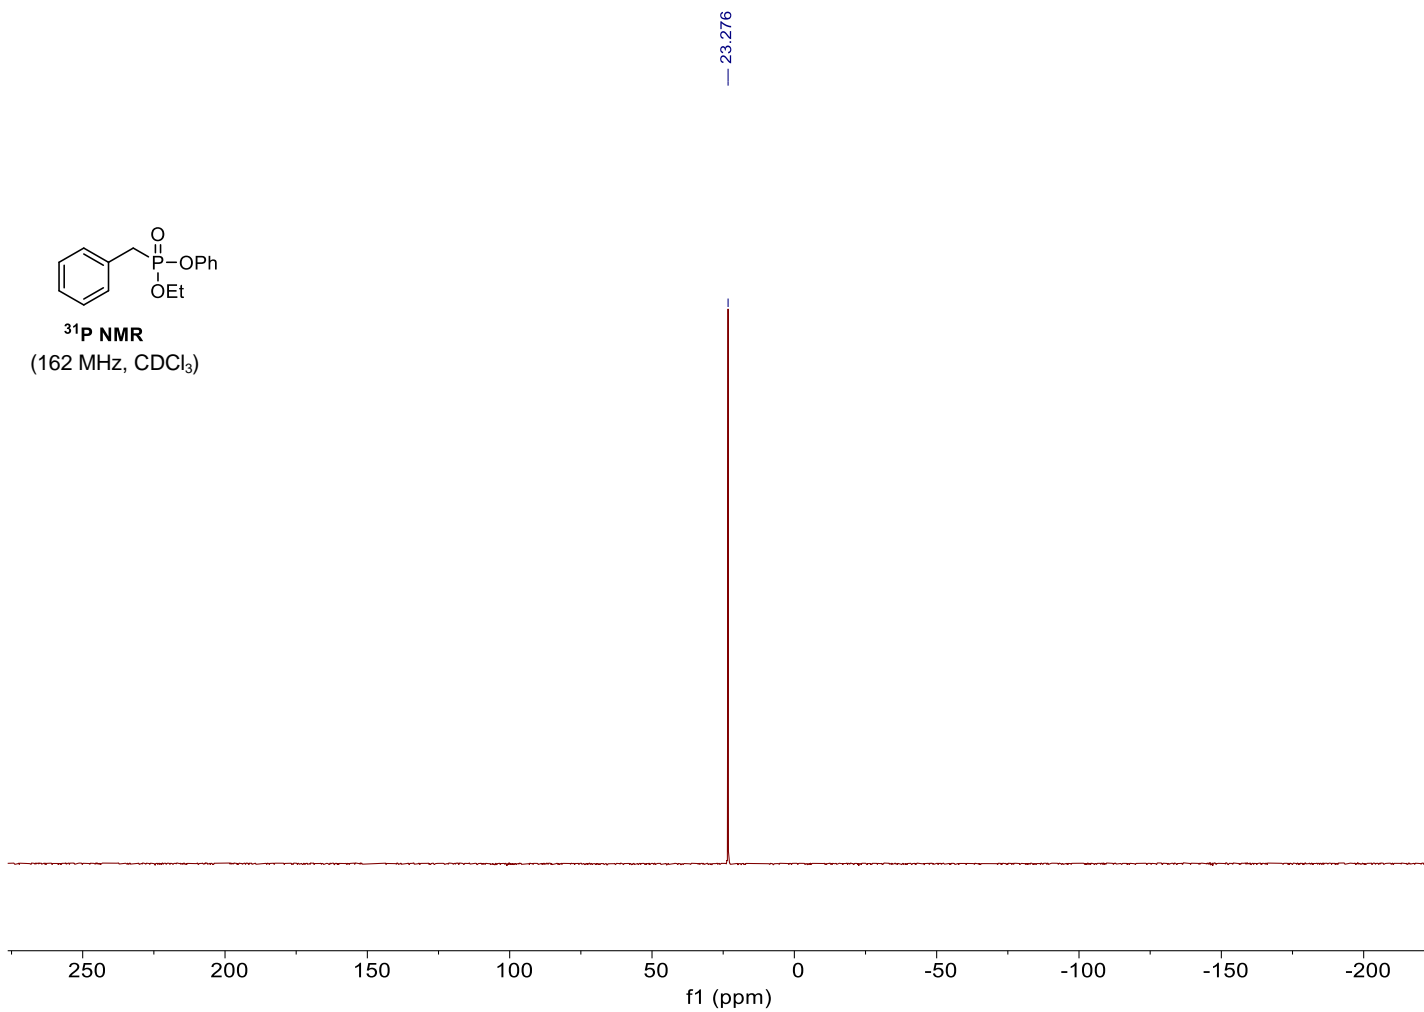

S150

8.765  
8.752  
7.927  
7.914  
7.845  
7.833  
7.783  
7.769  
7.658  
7.645  
7.632  
7.569  
7.557  
7.544

4.218  
4.216  
4.207  
4.204  
4.201  
4.199  
4.190  
4.187  
4.176  
4.165  
4.161  
4.153  
4.148  
4.143  
4.140  
4.136  
3.852  
3.818

1.324  
1.312  
1.300

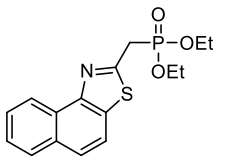

<sup>1</sup>H NMR  
(600 MHz, CDCl<sub>3</sub>)

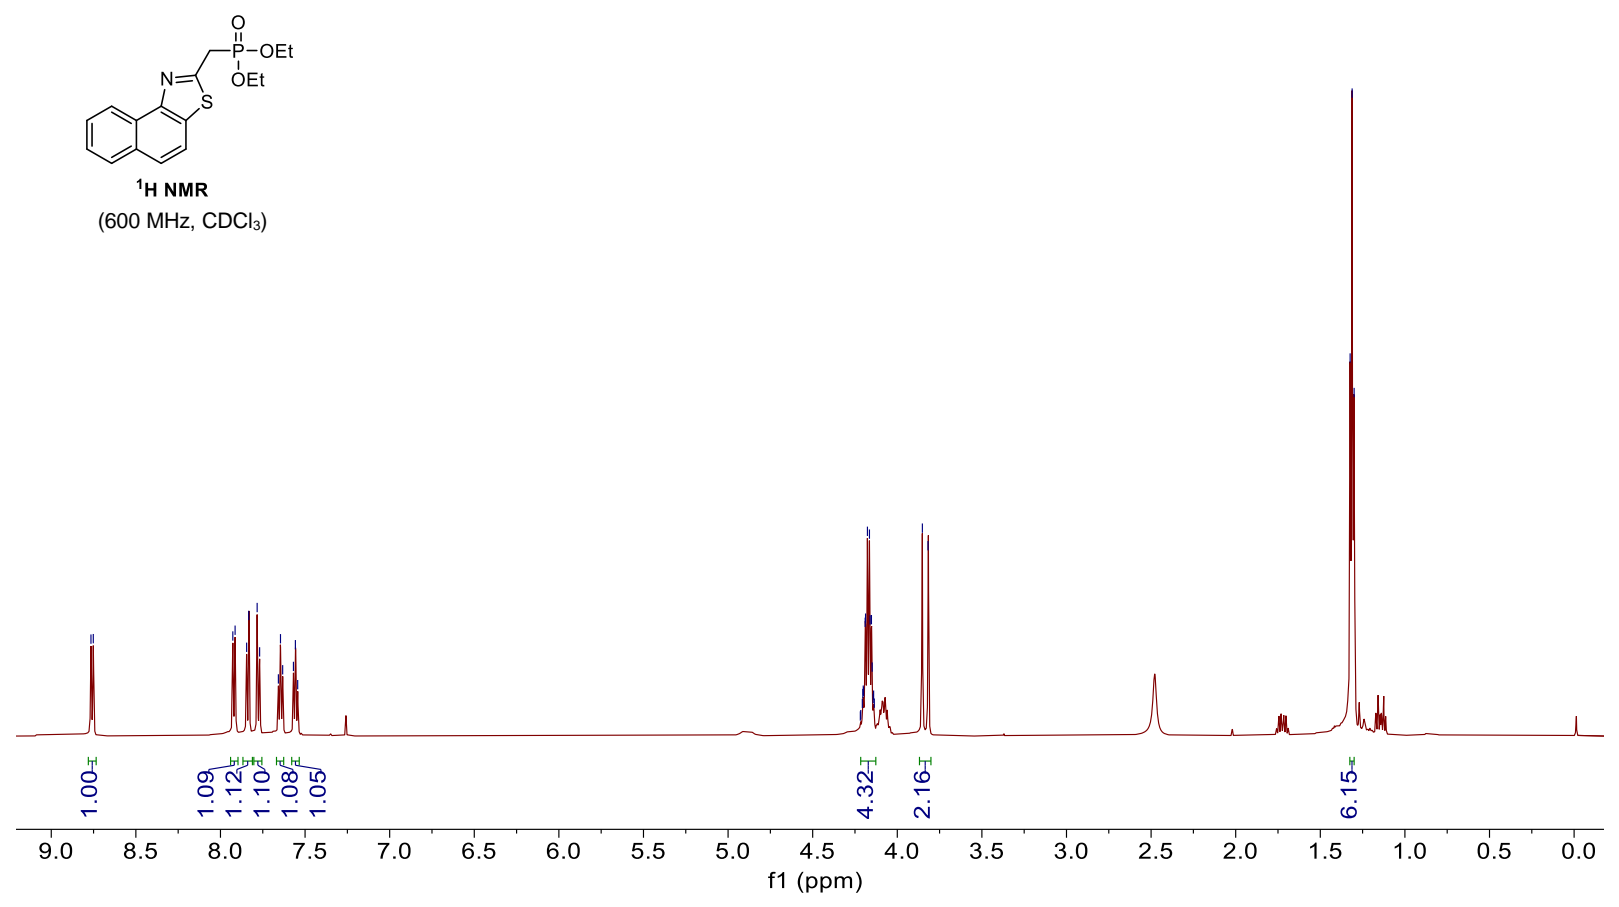

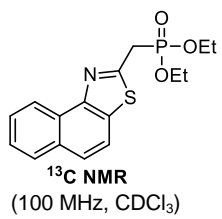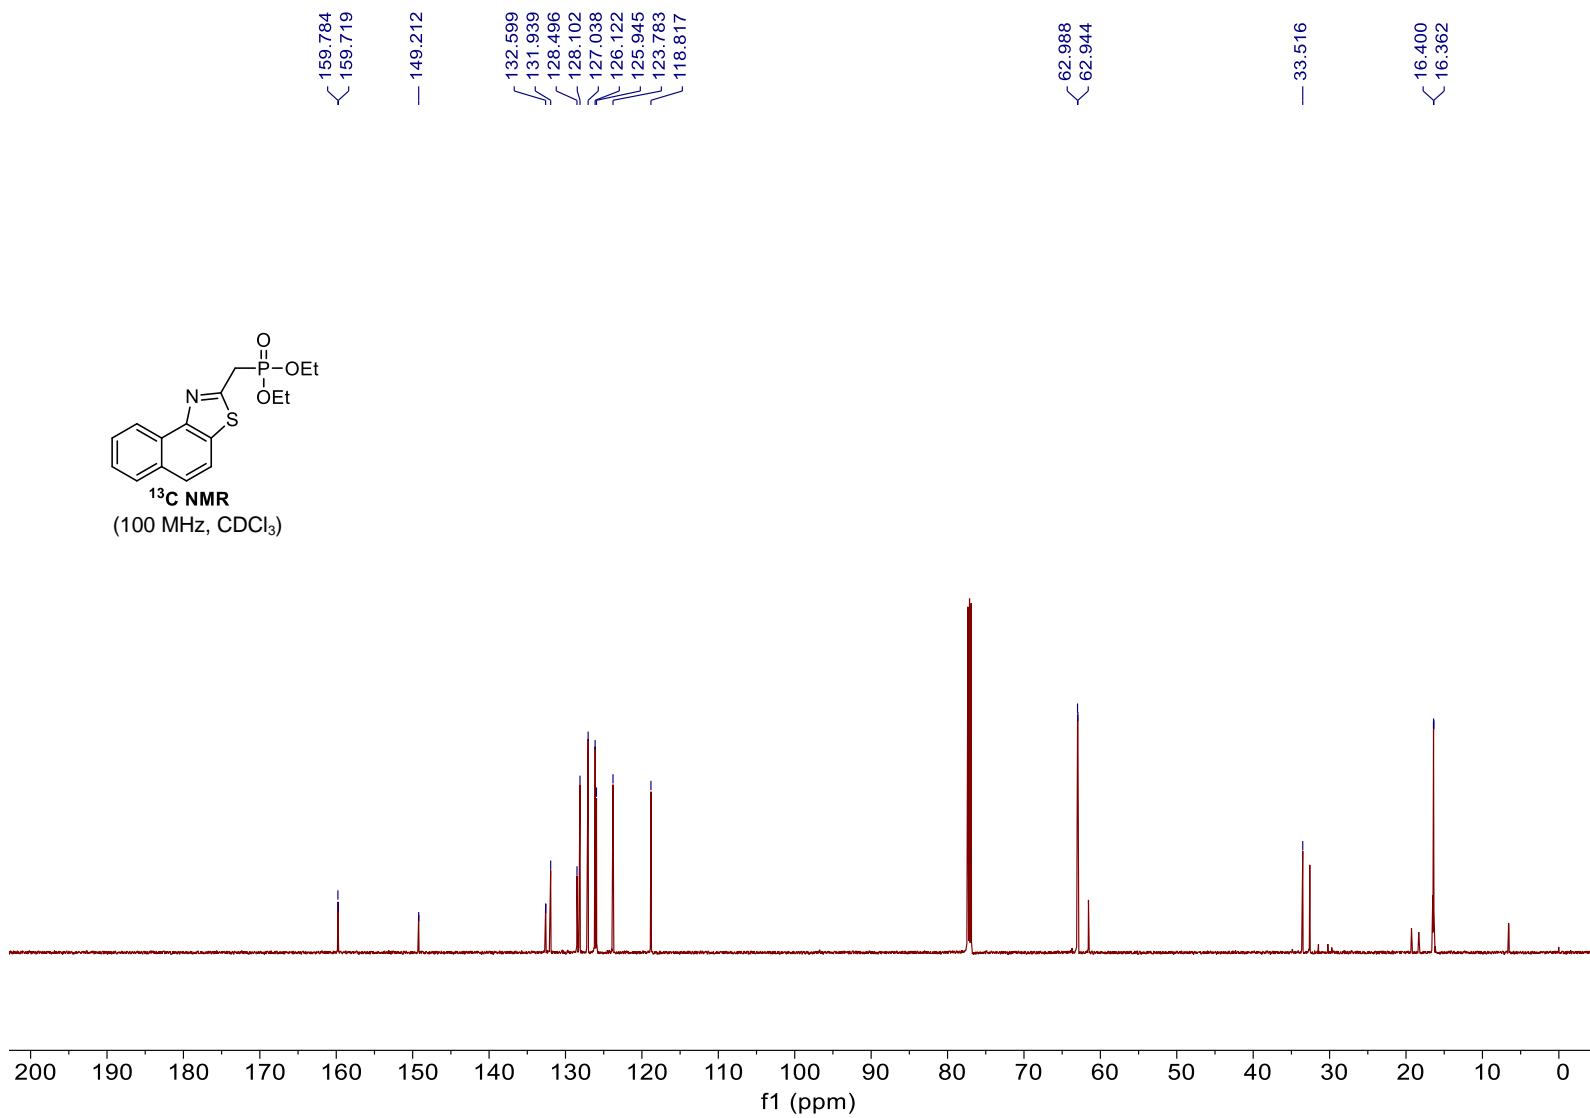



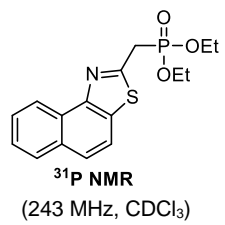

— 21.206

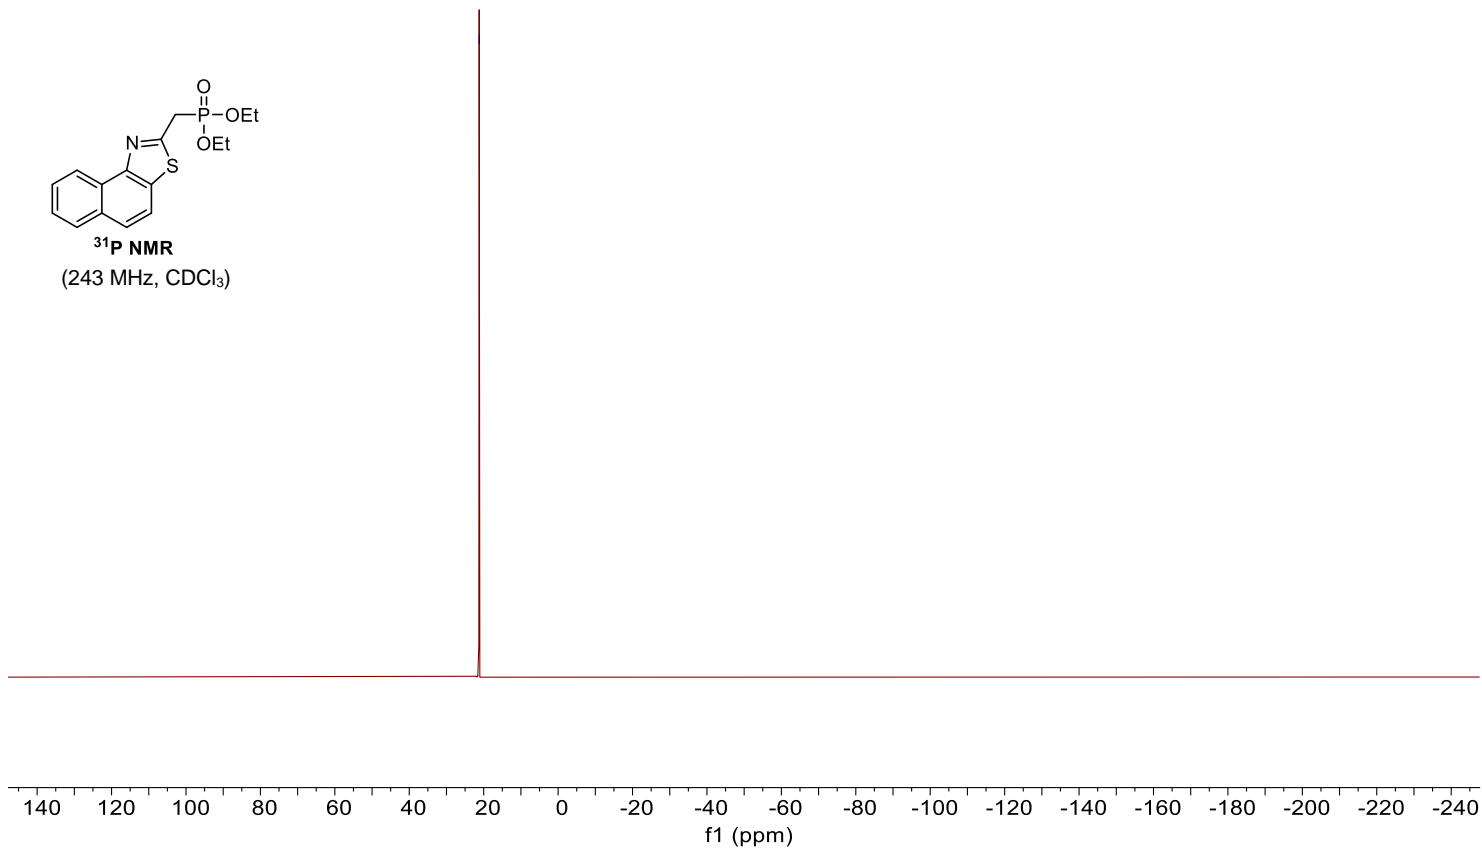

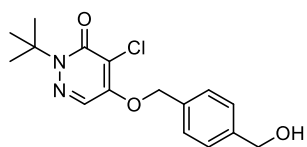

**<sup>1</sup>H NMR**  
(400 MHz, CDCl<sub>3</sub>)

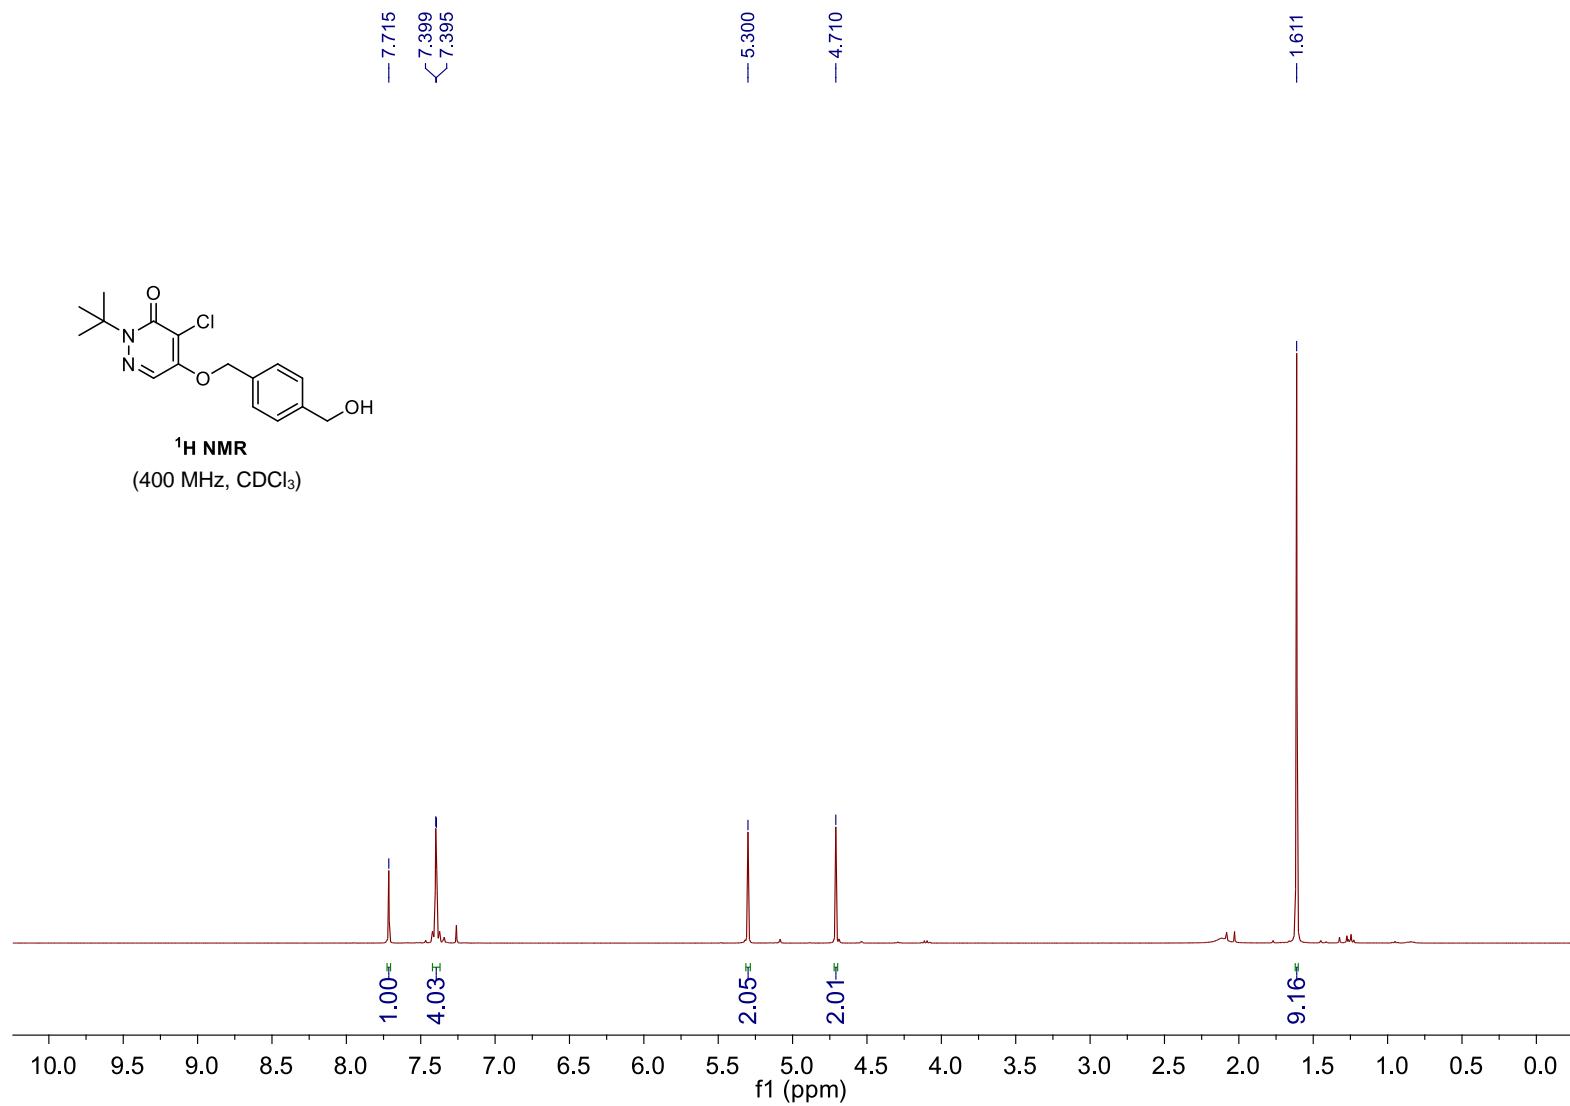

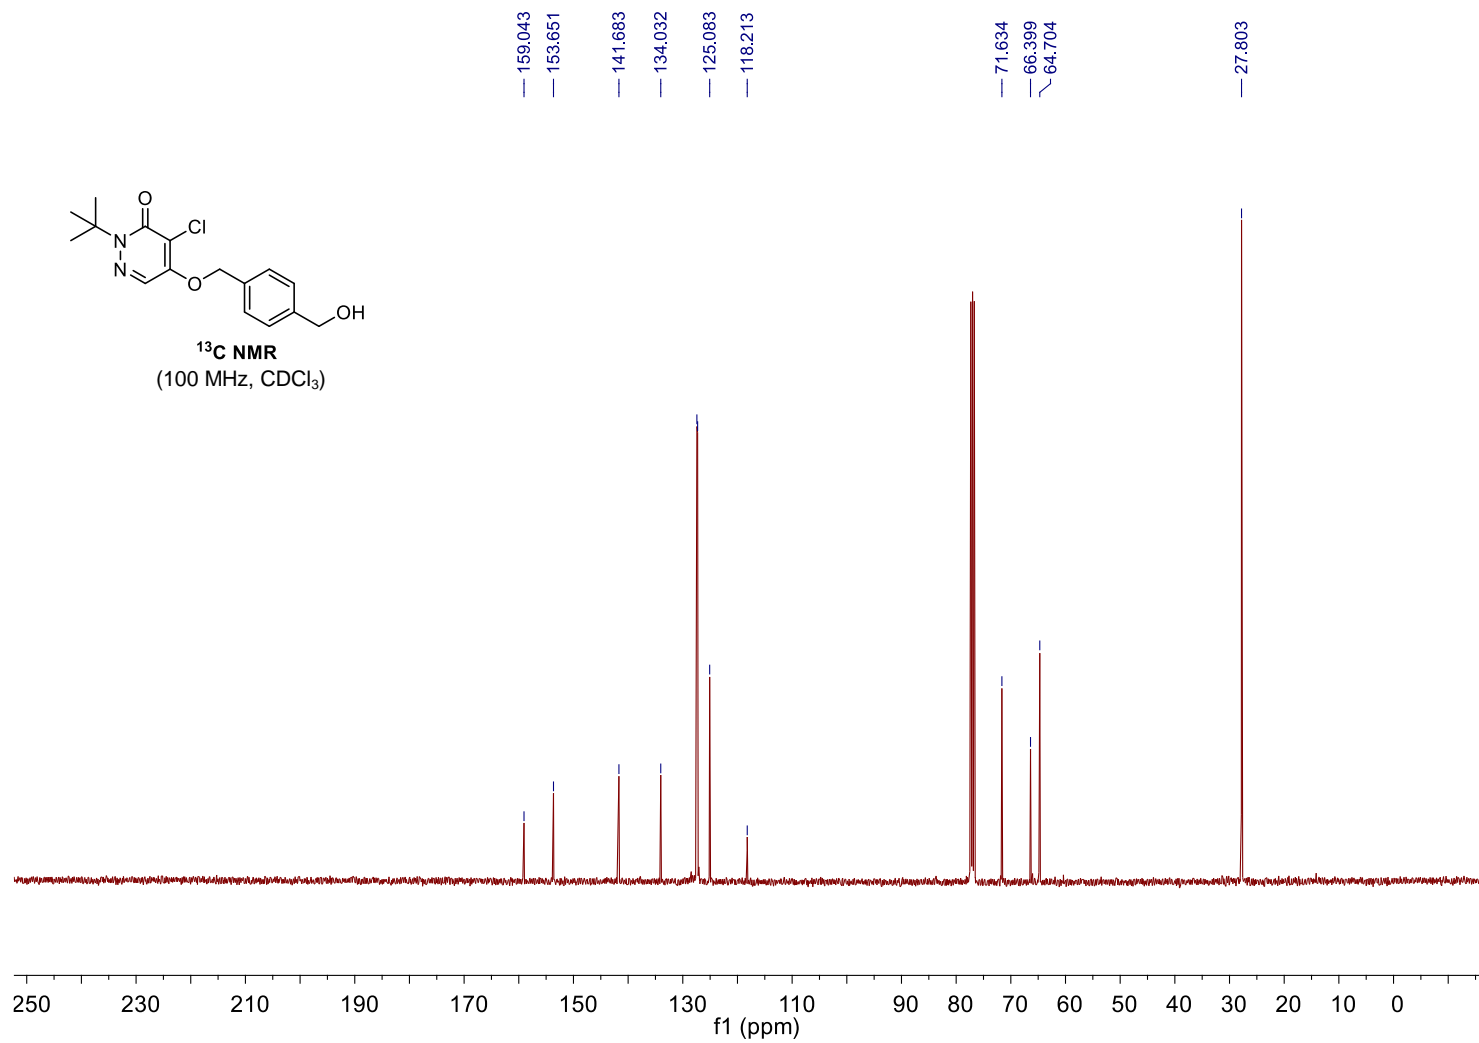

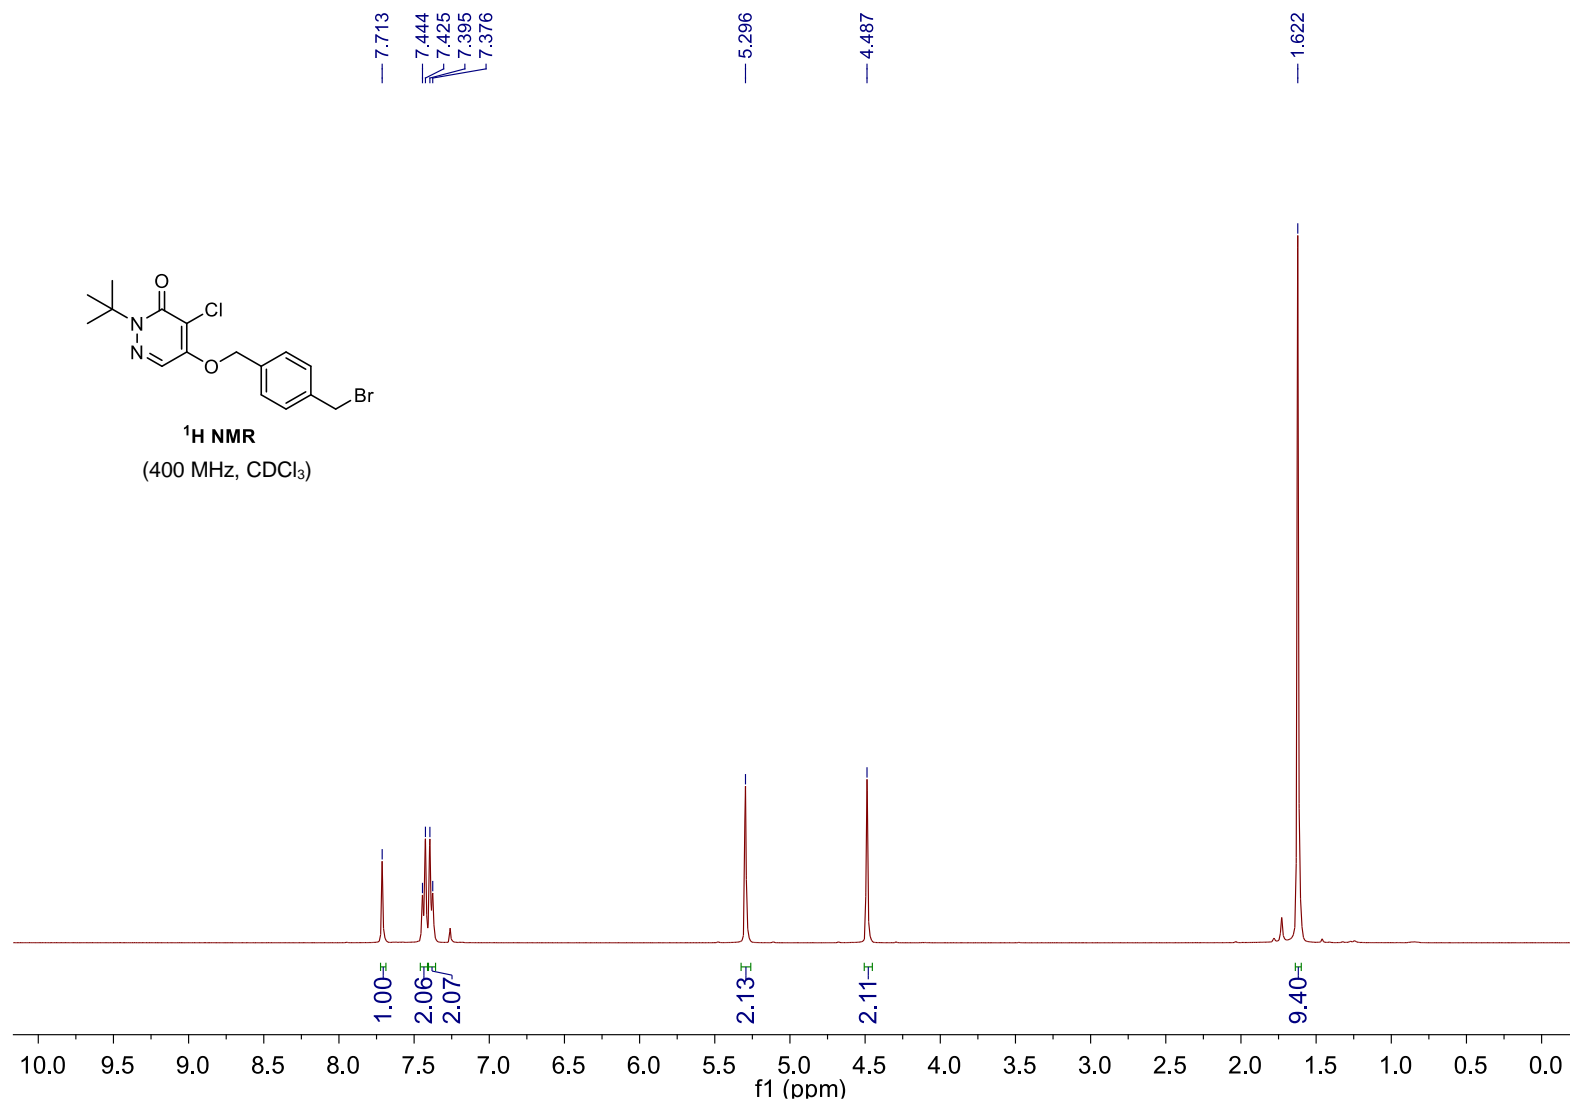

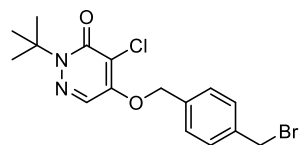

**<sup>13</sup>C NMR**  
(100 MHz, CDCl<sub>3</sub>)

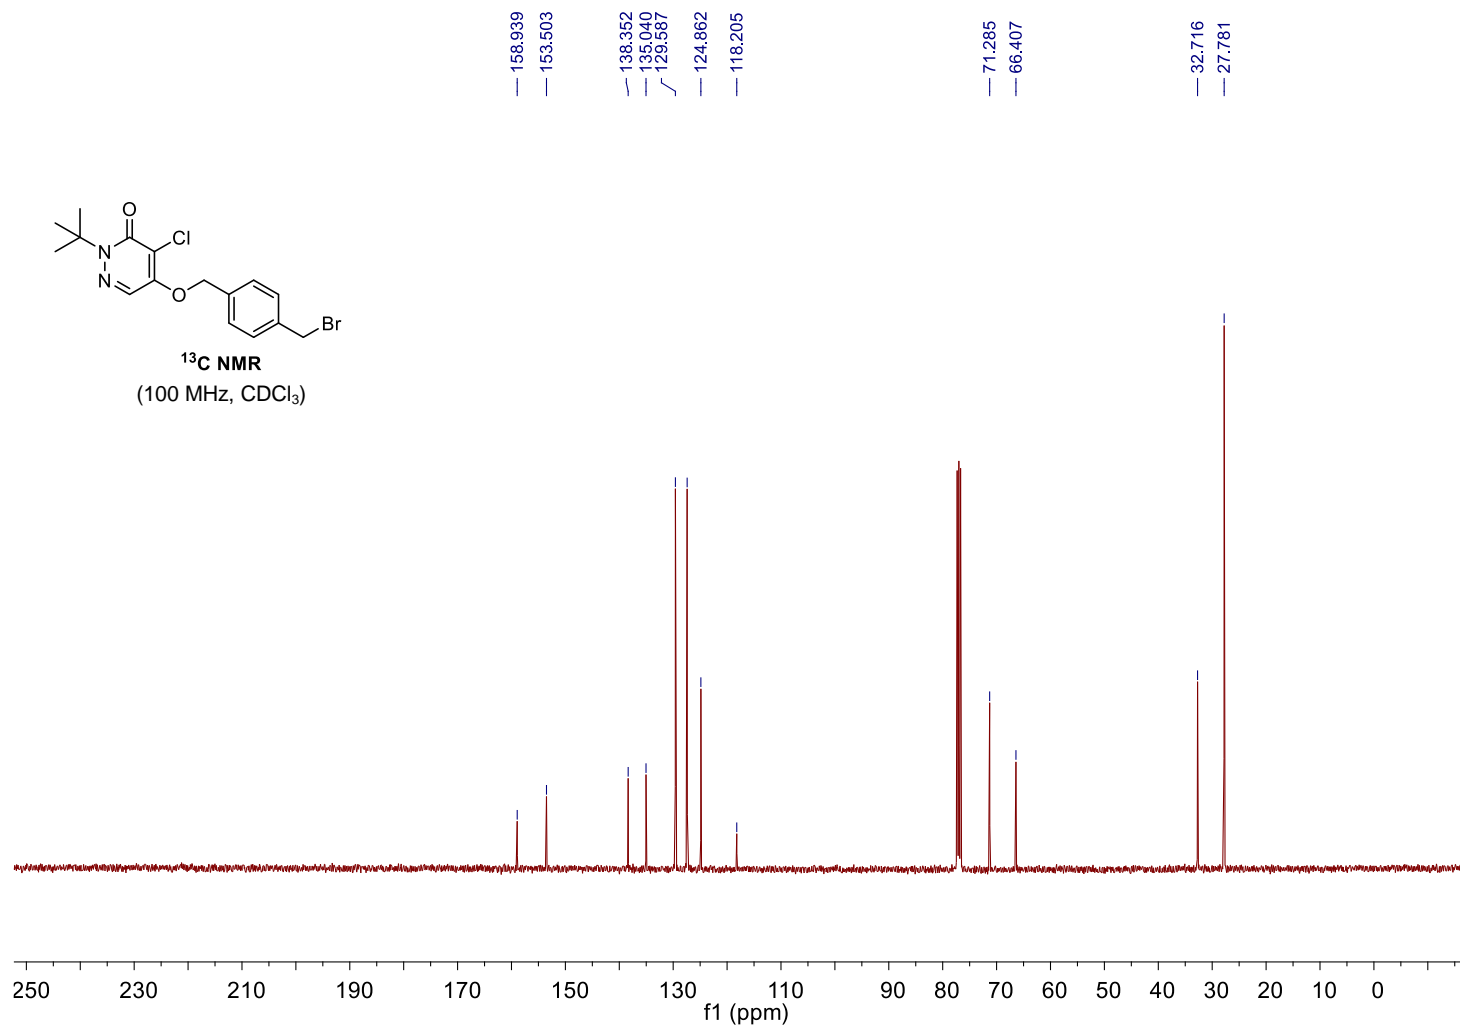

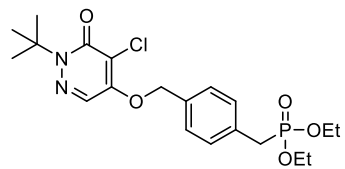

**<sup>1</sup>H NMR**  
(400 MHz, CDCl<sub>3</sub>)

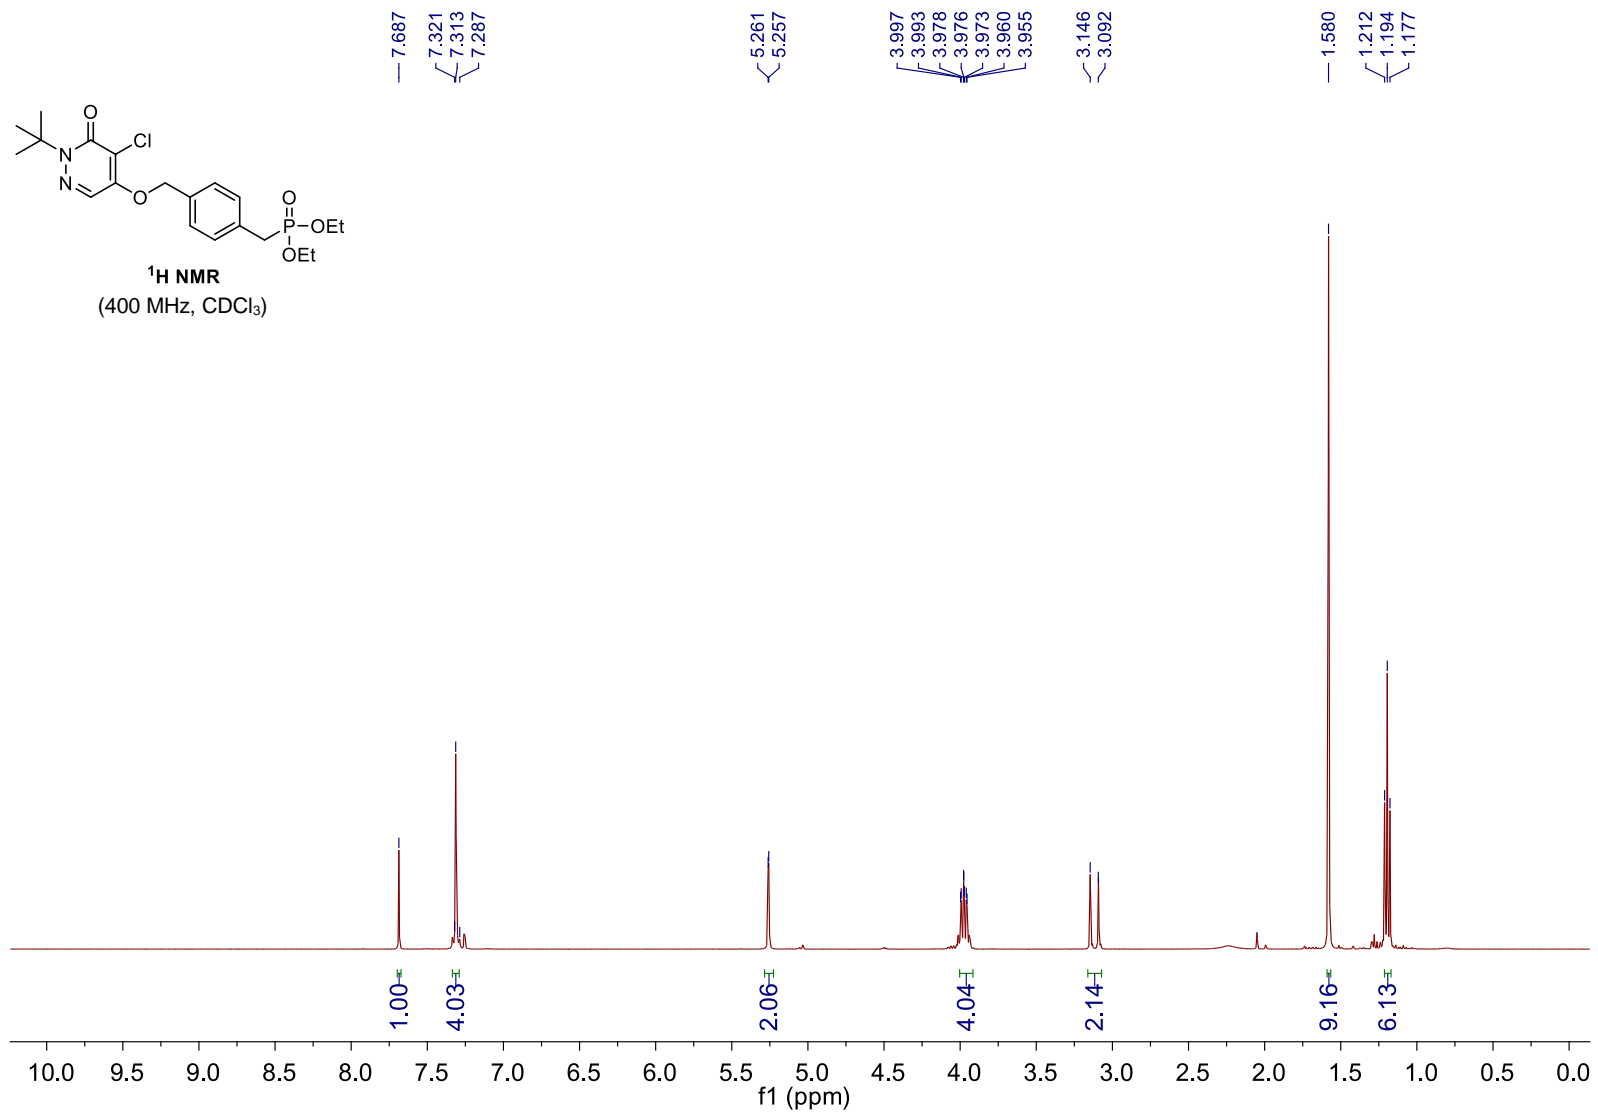

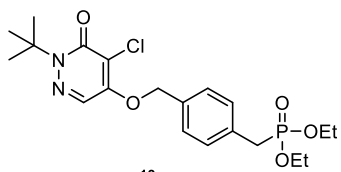

**<sup>13</sup>C NMR**  
(100 MHz, CDCl<sub>3</sub>)

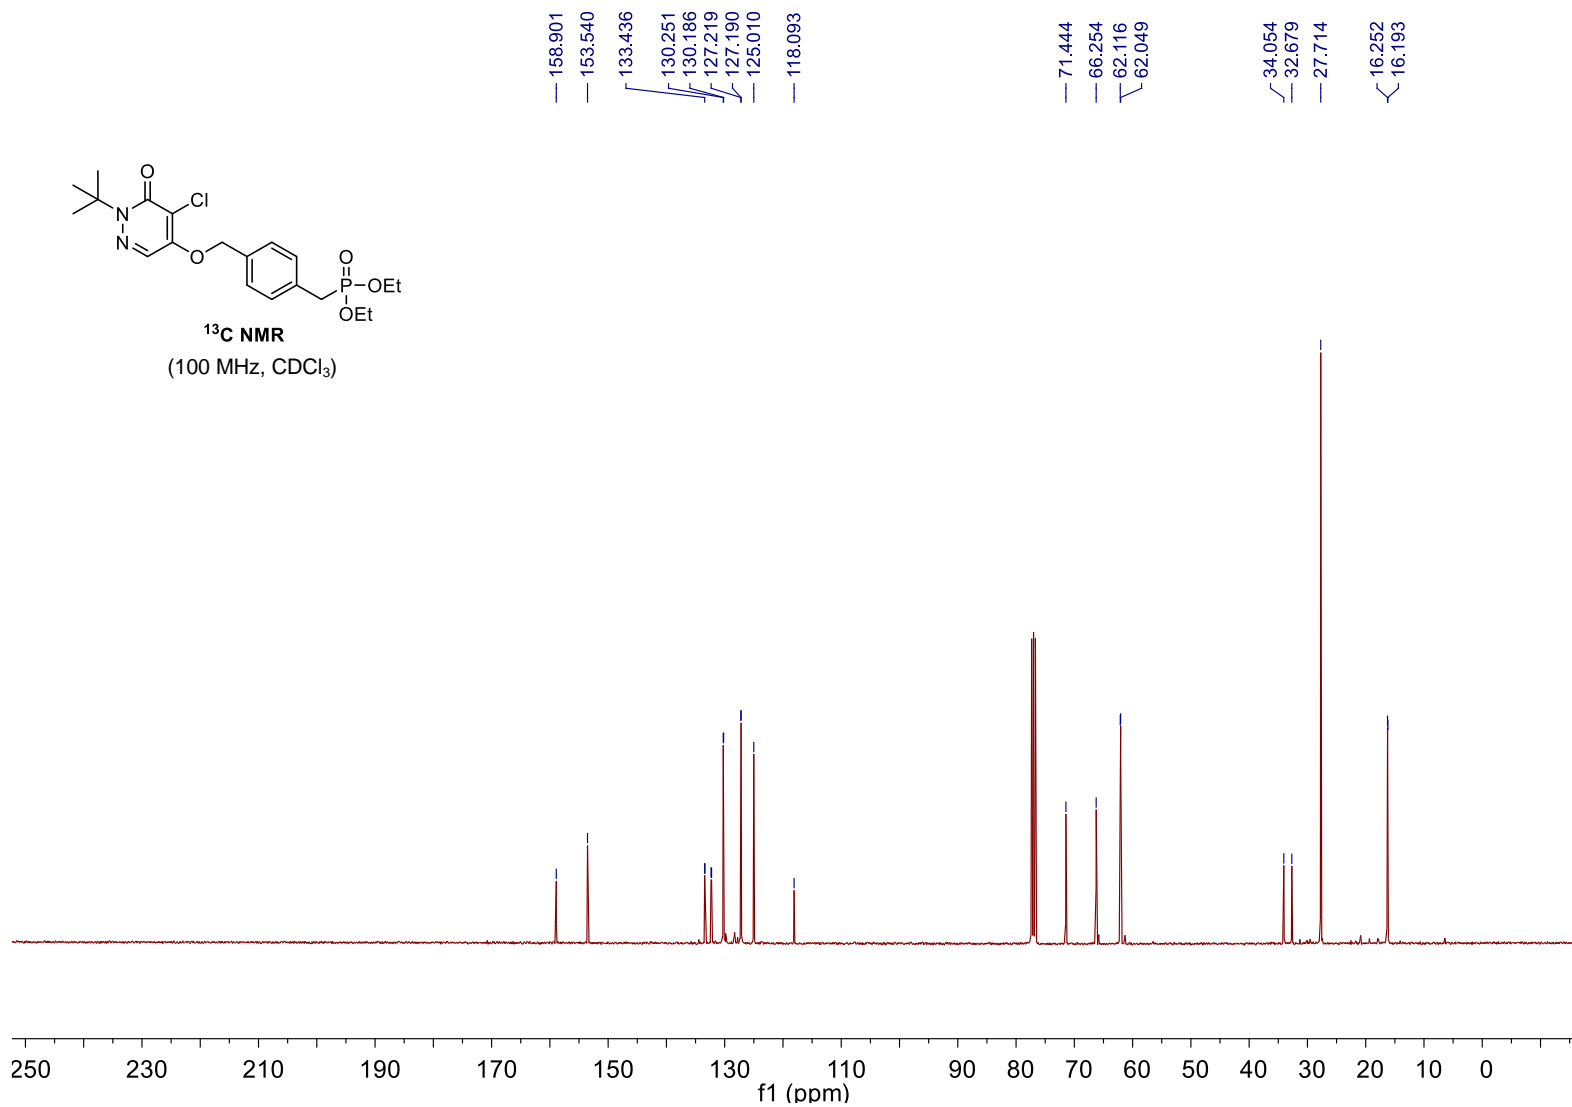

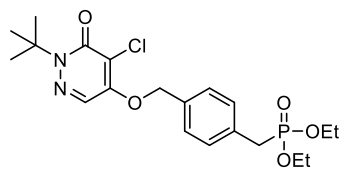

**<sup>31</sup>P NMR**  
(162 MHz, CDCl<sub>3</sub>)

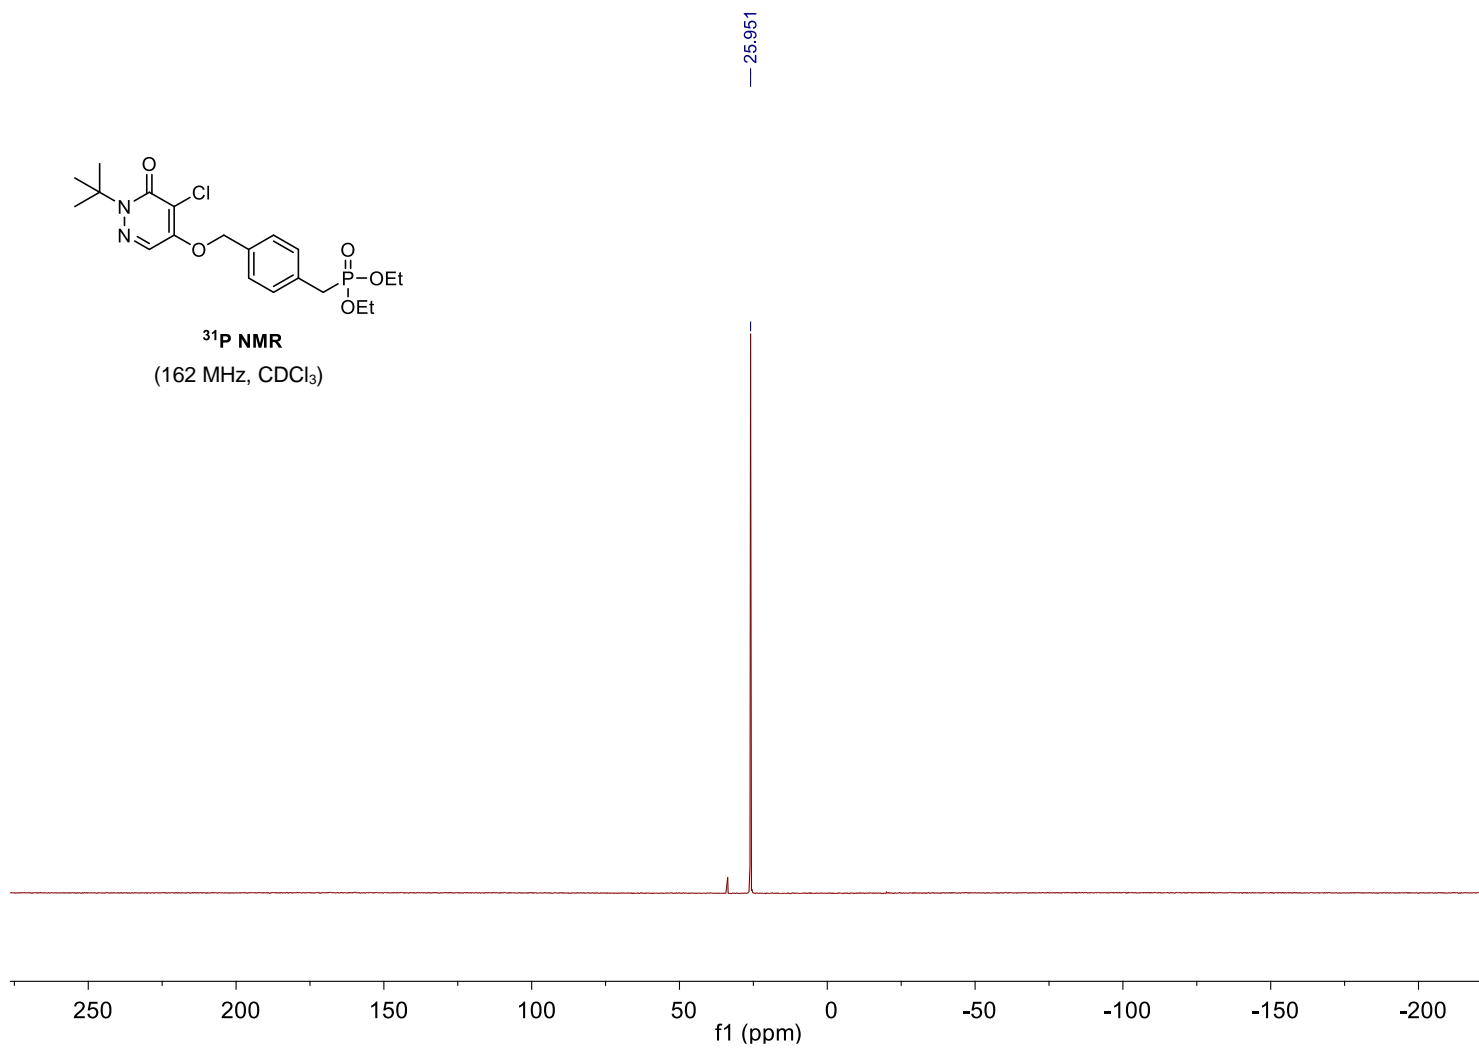

S160



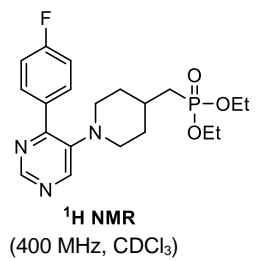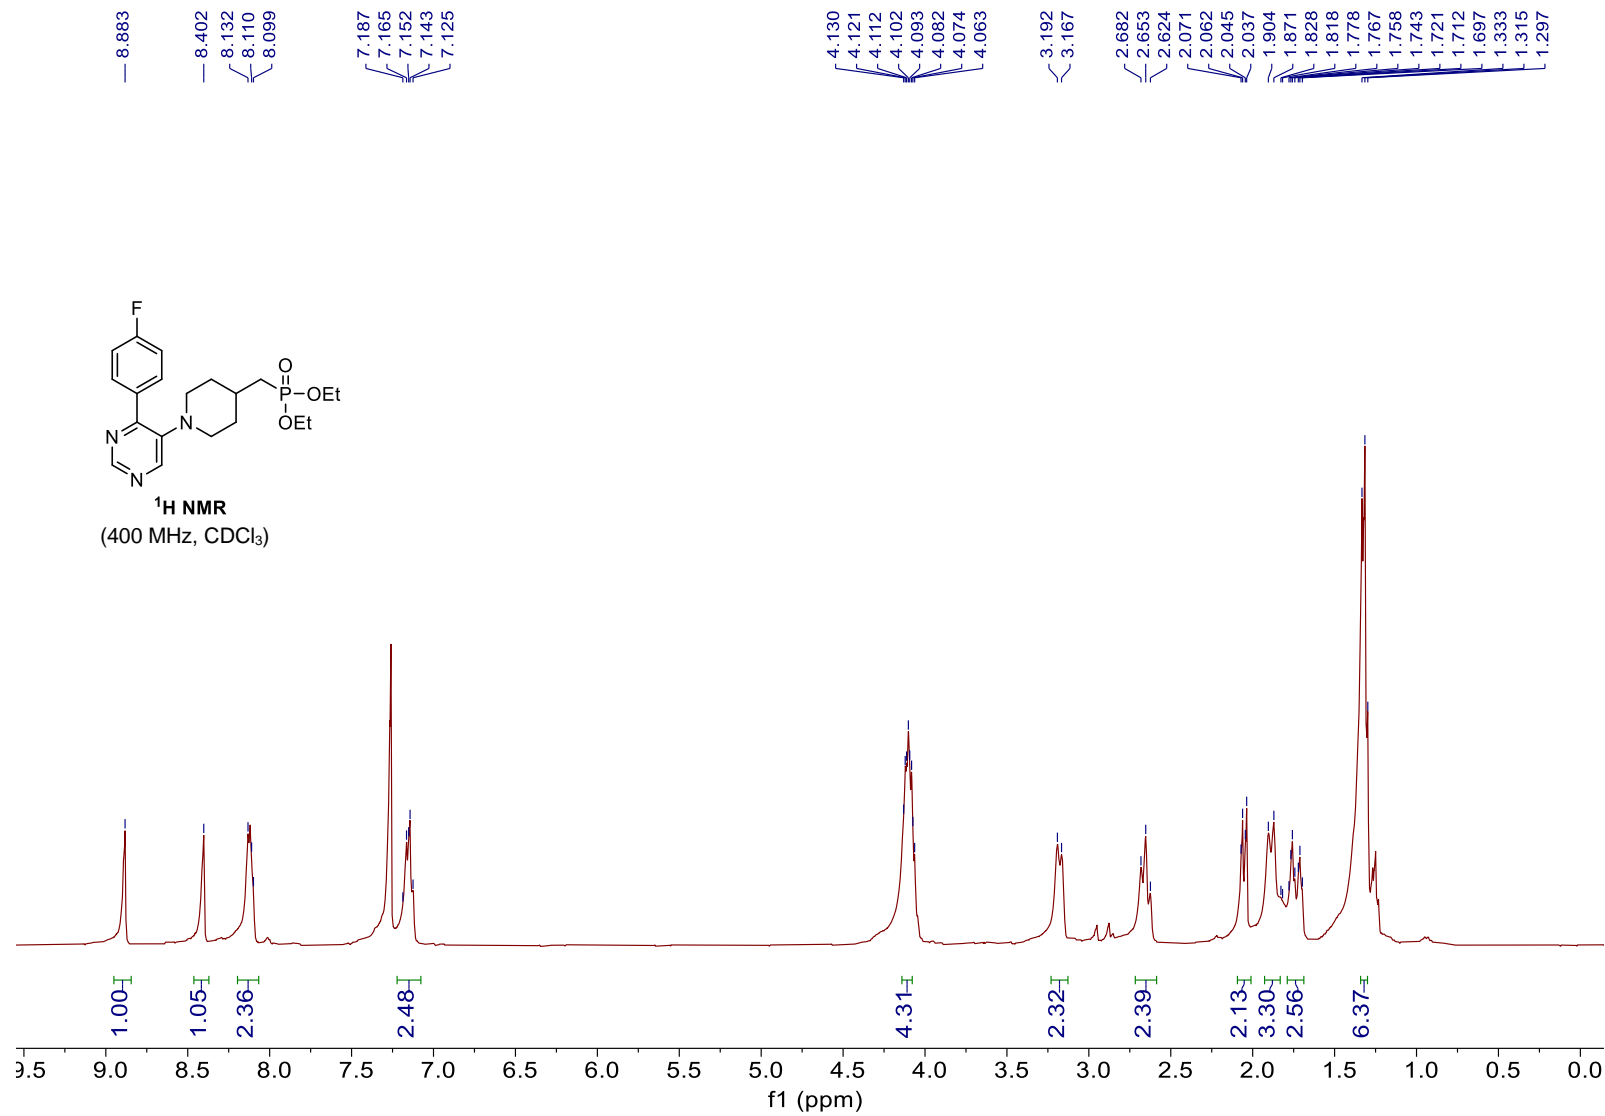

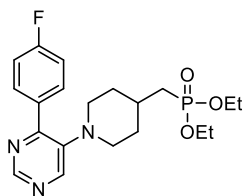

<sup>13</sup>C NMR  
(100 MHz, CDCl<sub>3</sub>)

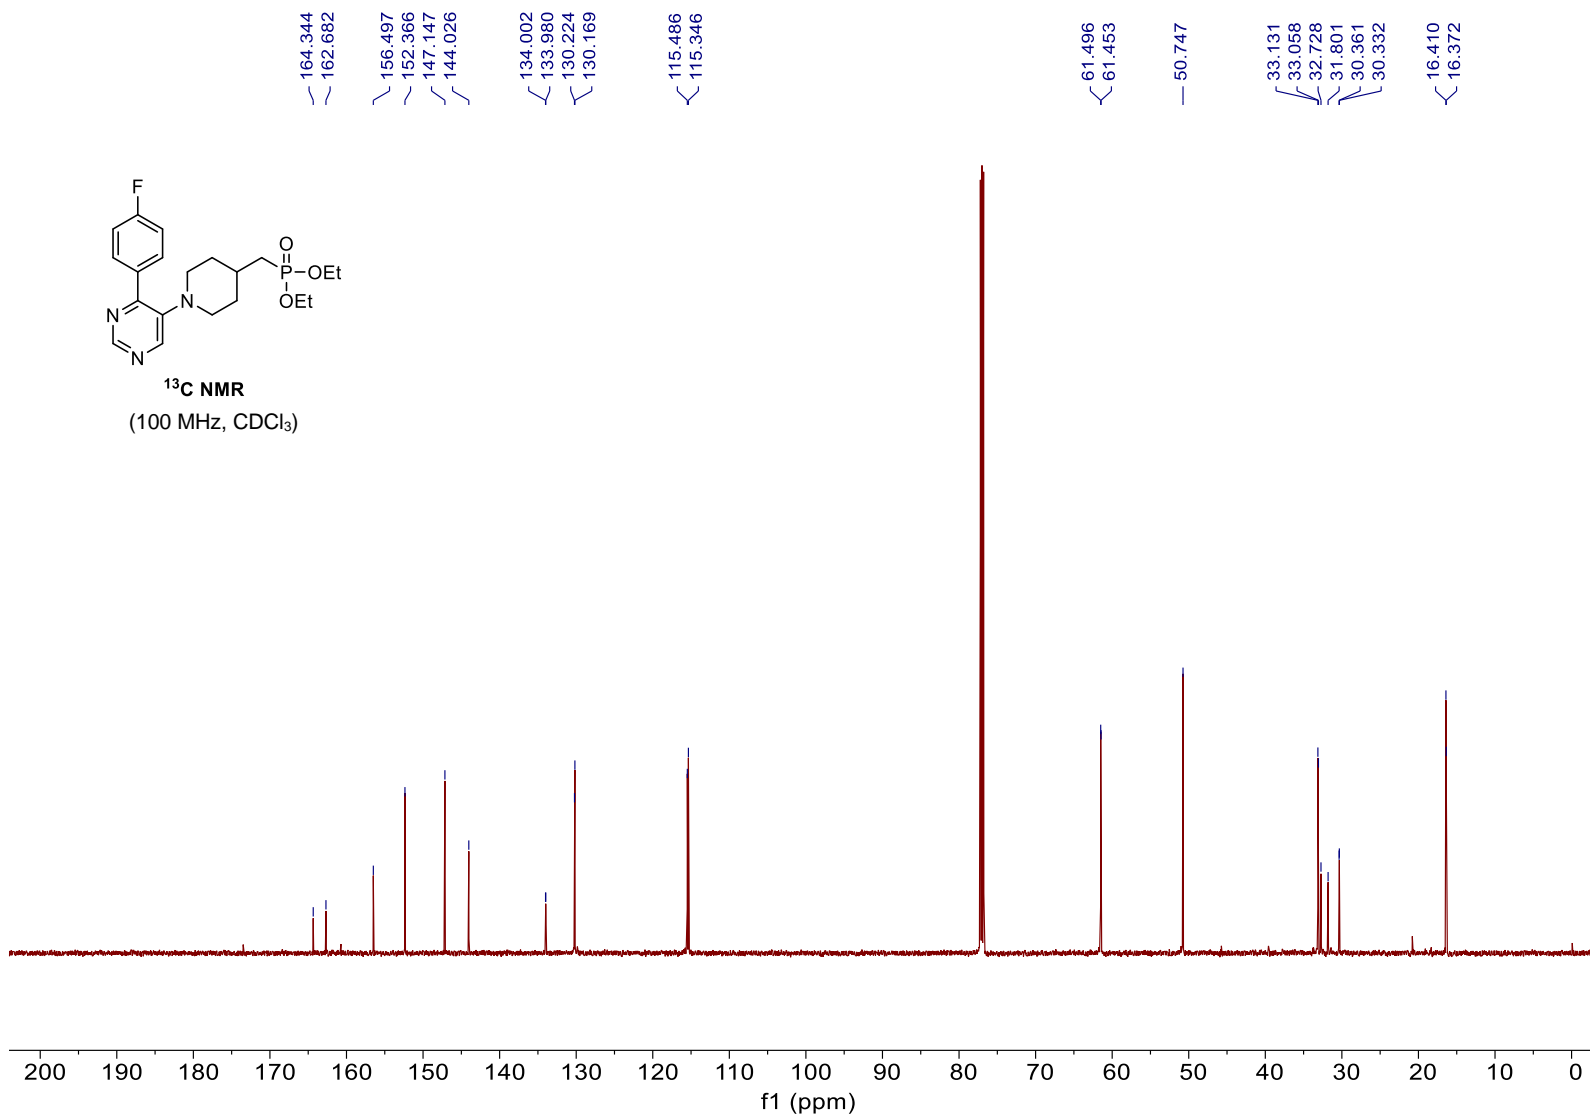

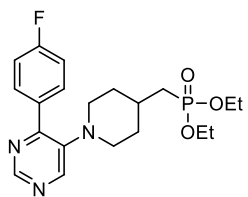

**<sup>31</sup>P NMR**  
(162 MHz, CDCl<sub>3</sub>)

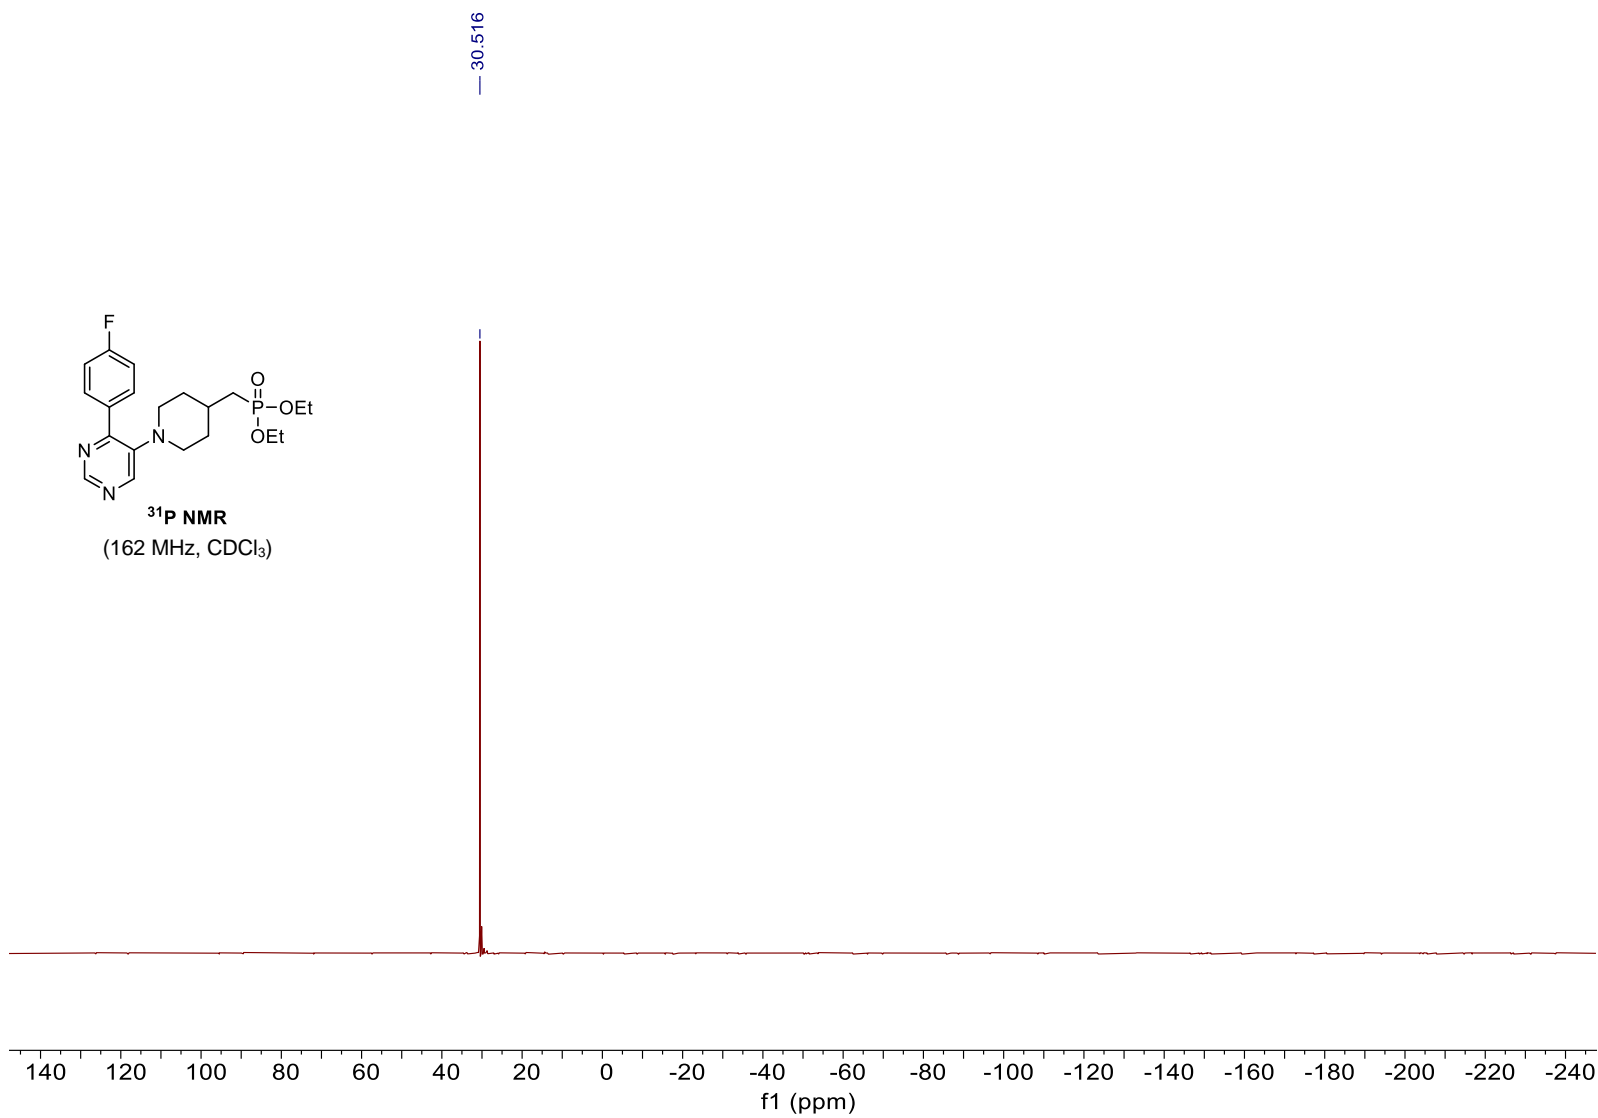

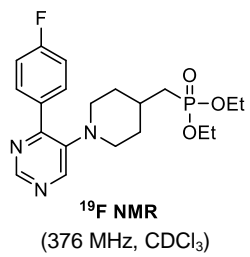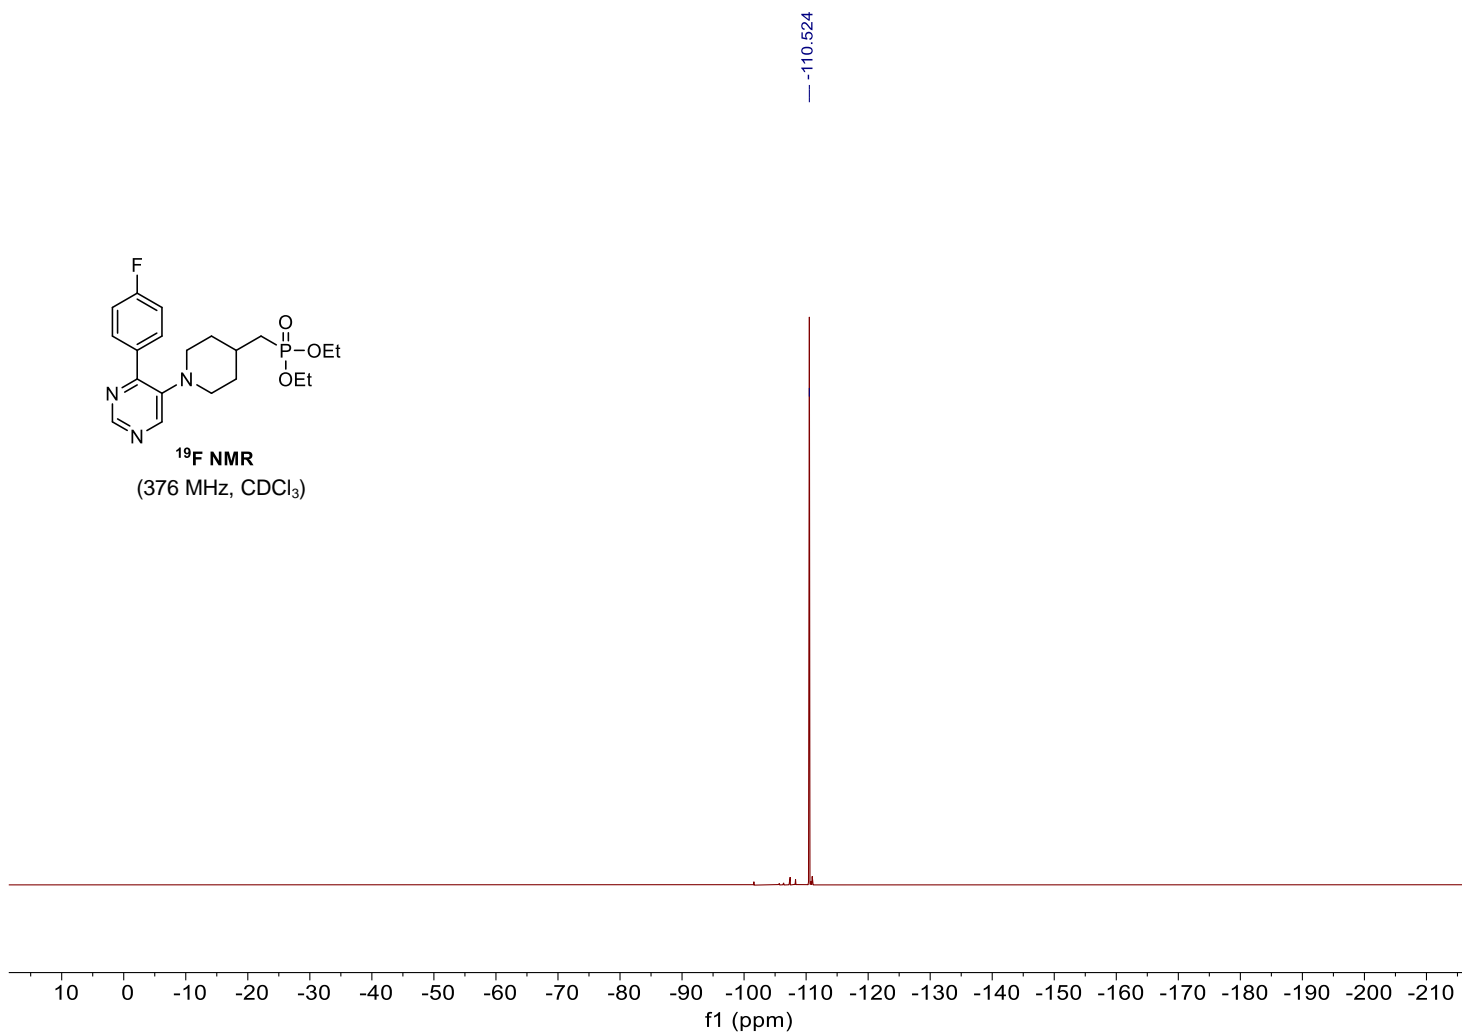

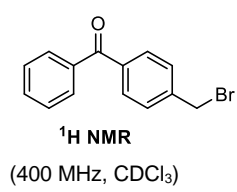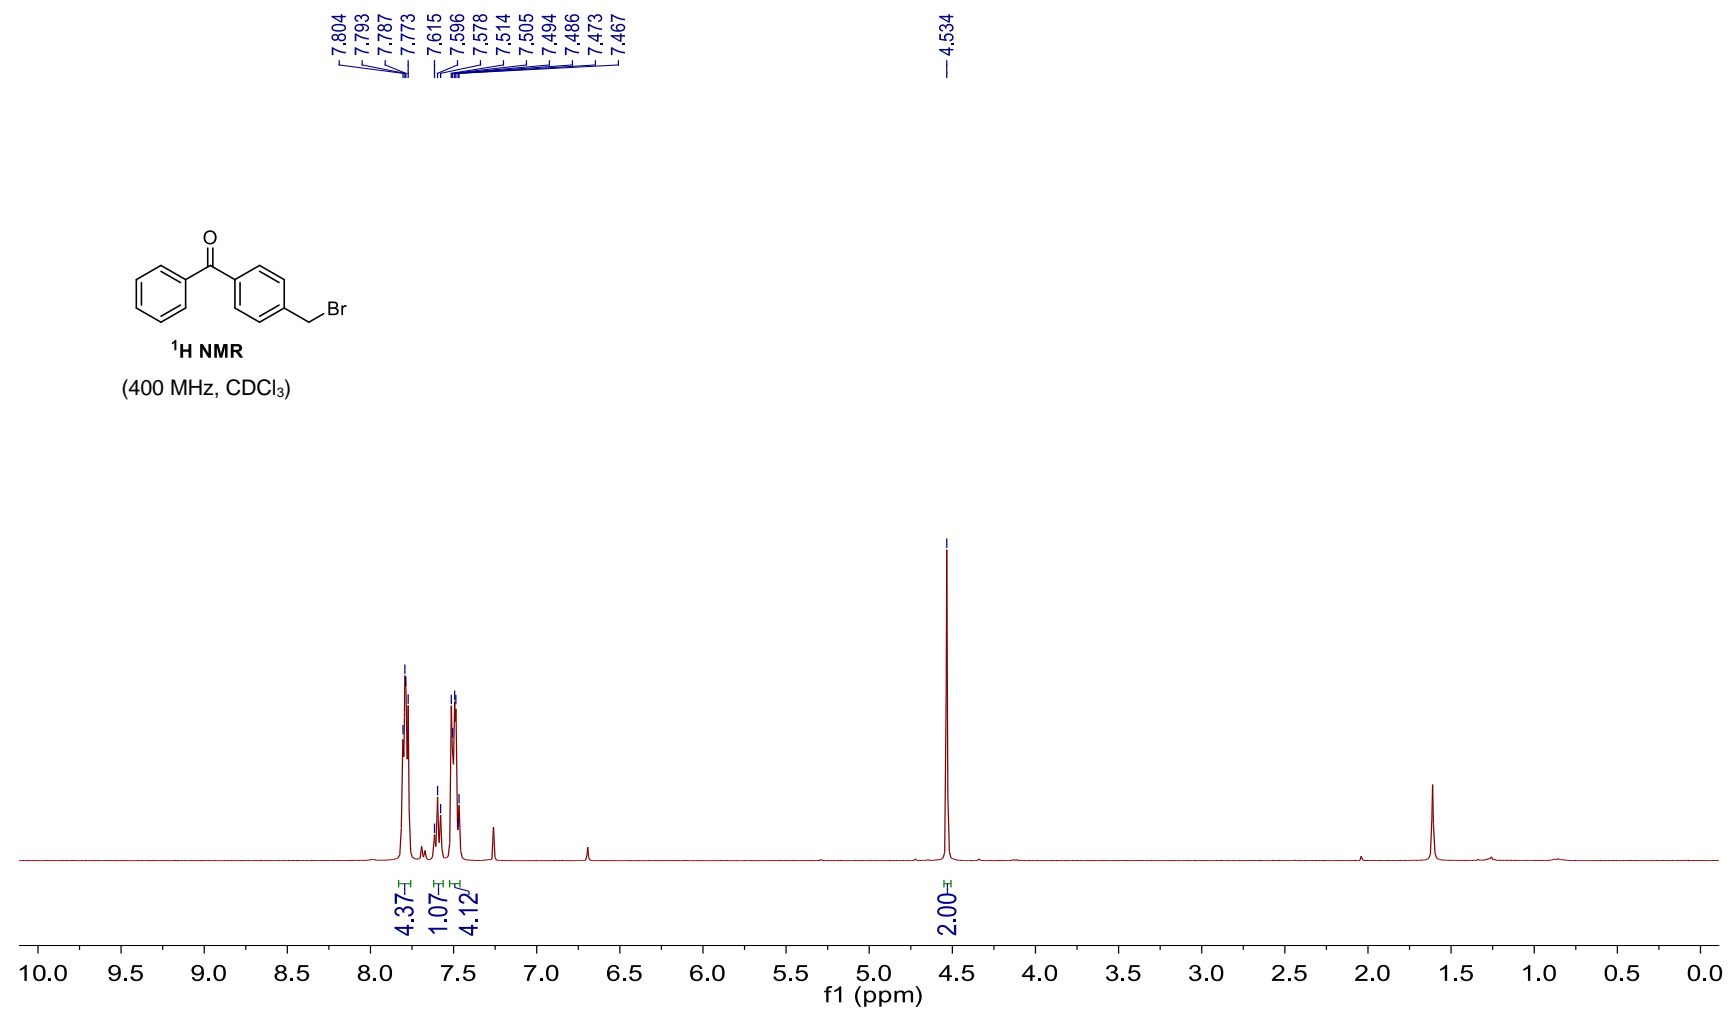

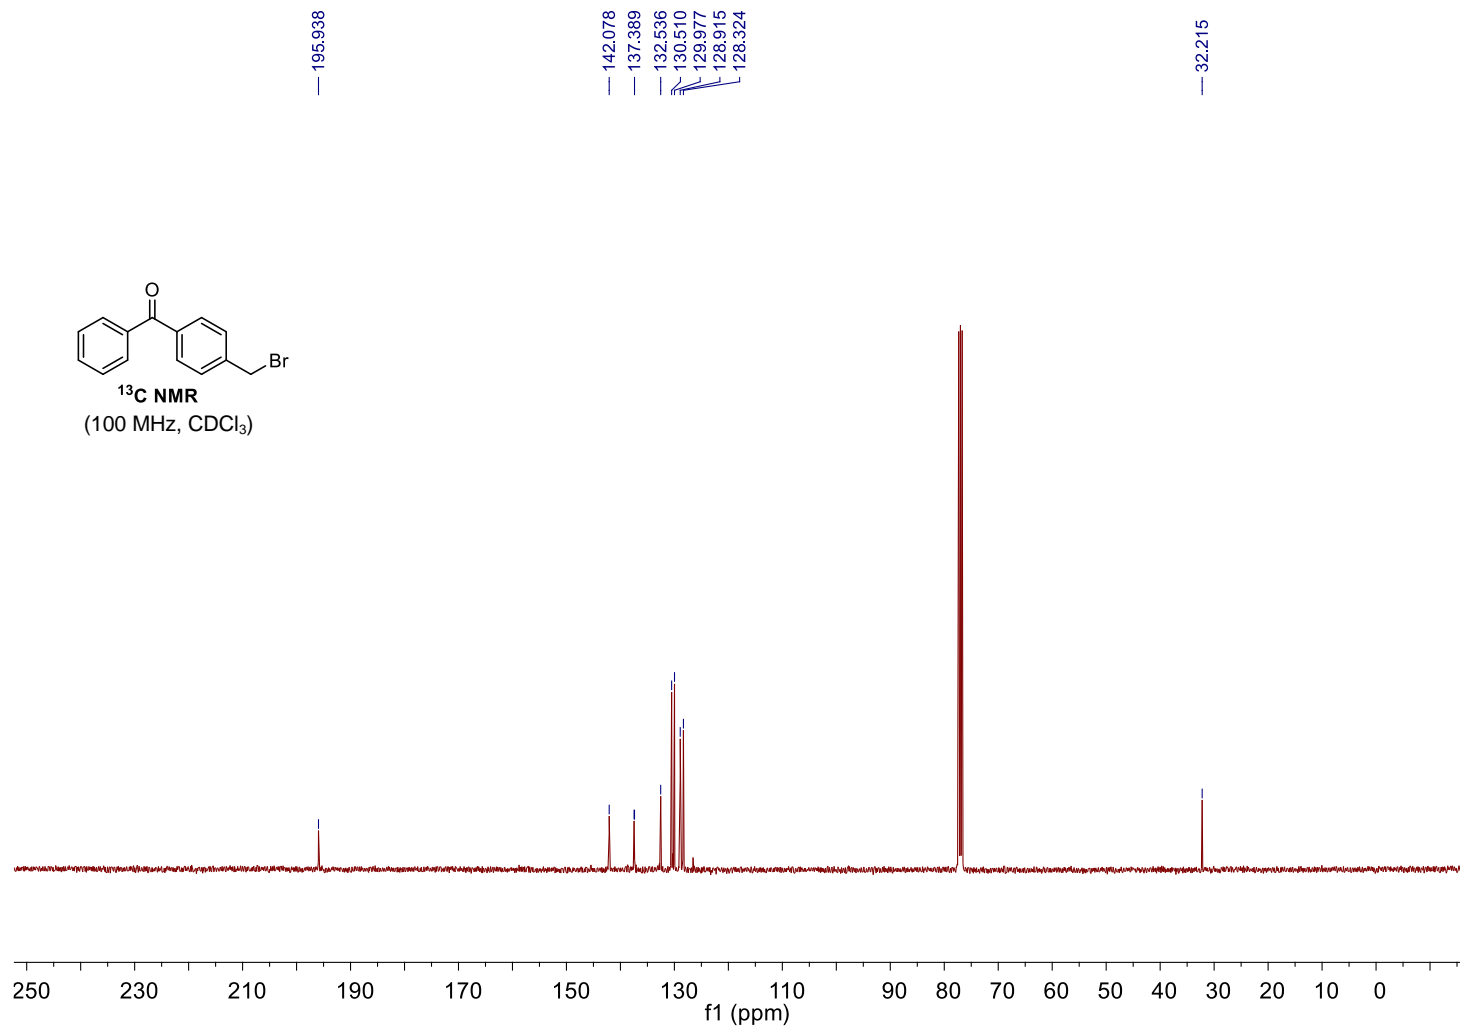

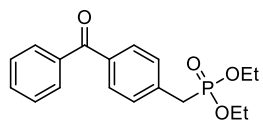

**<sup>1</sup>H NMR**  
(400 MHz, CDCl<sub>3</sub>)

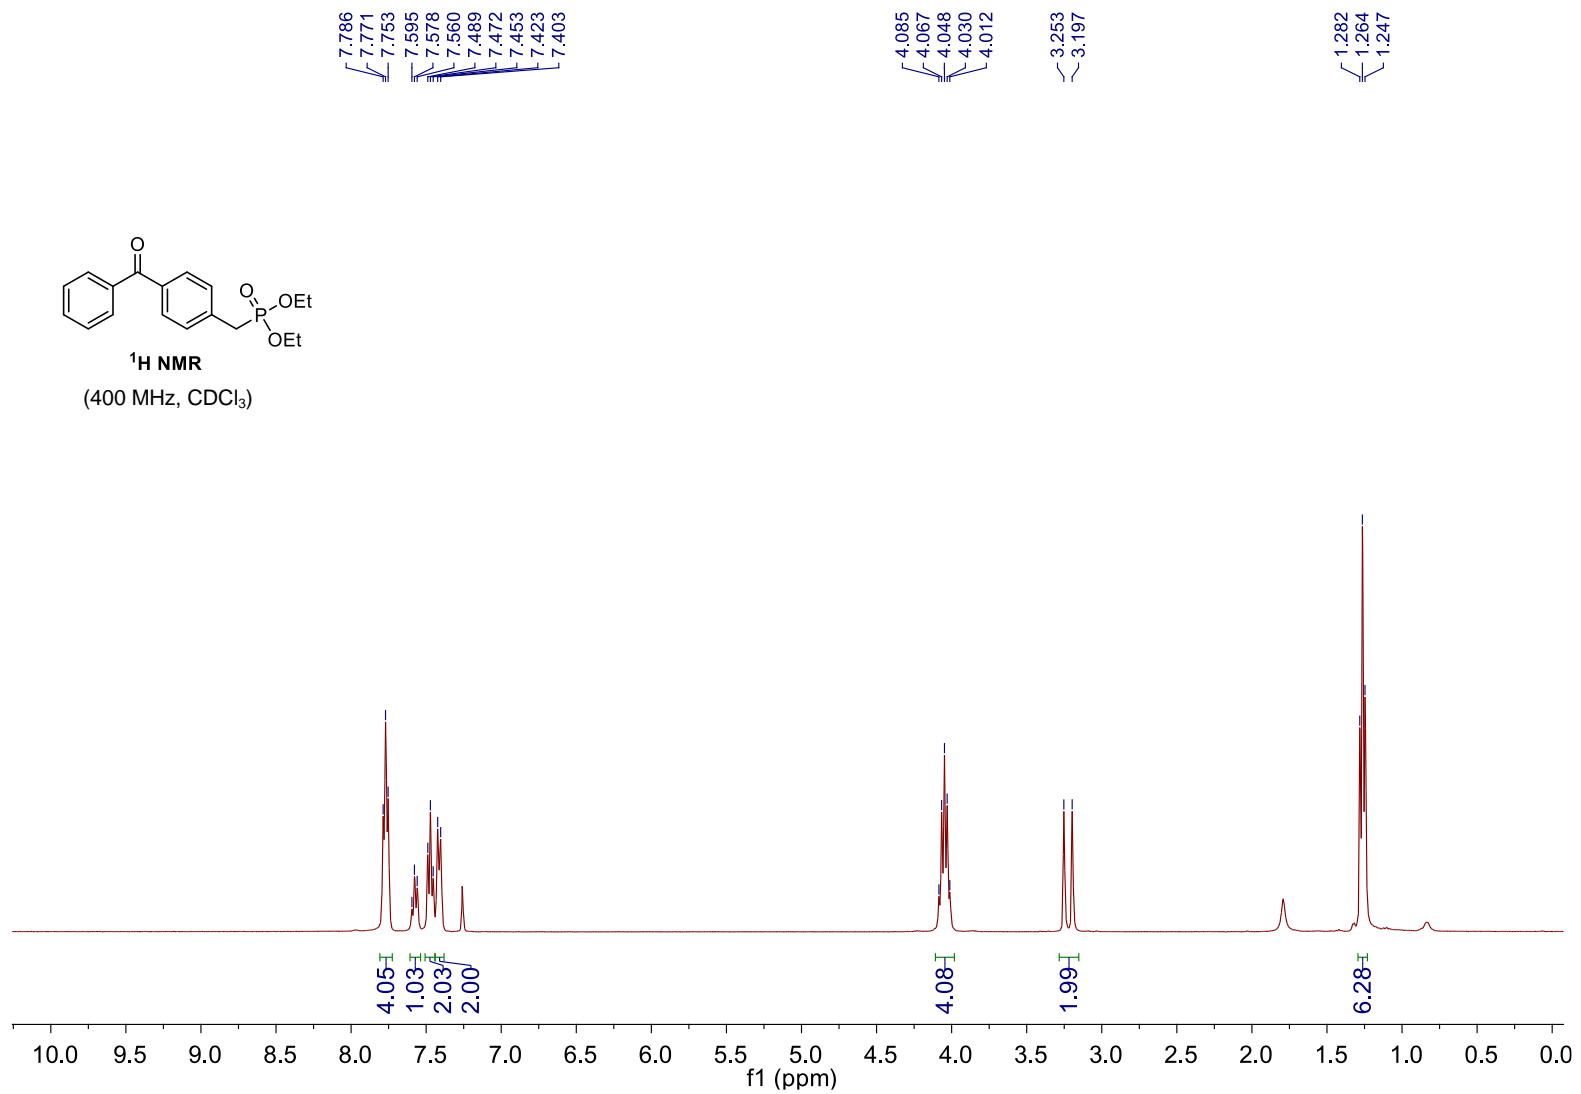

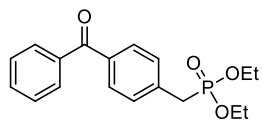

**<sup>13</sup>C NMR**  
(100 MHz, CDCl<sub>3</sub>)

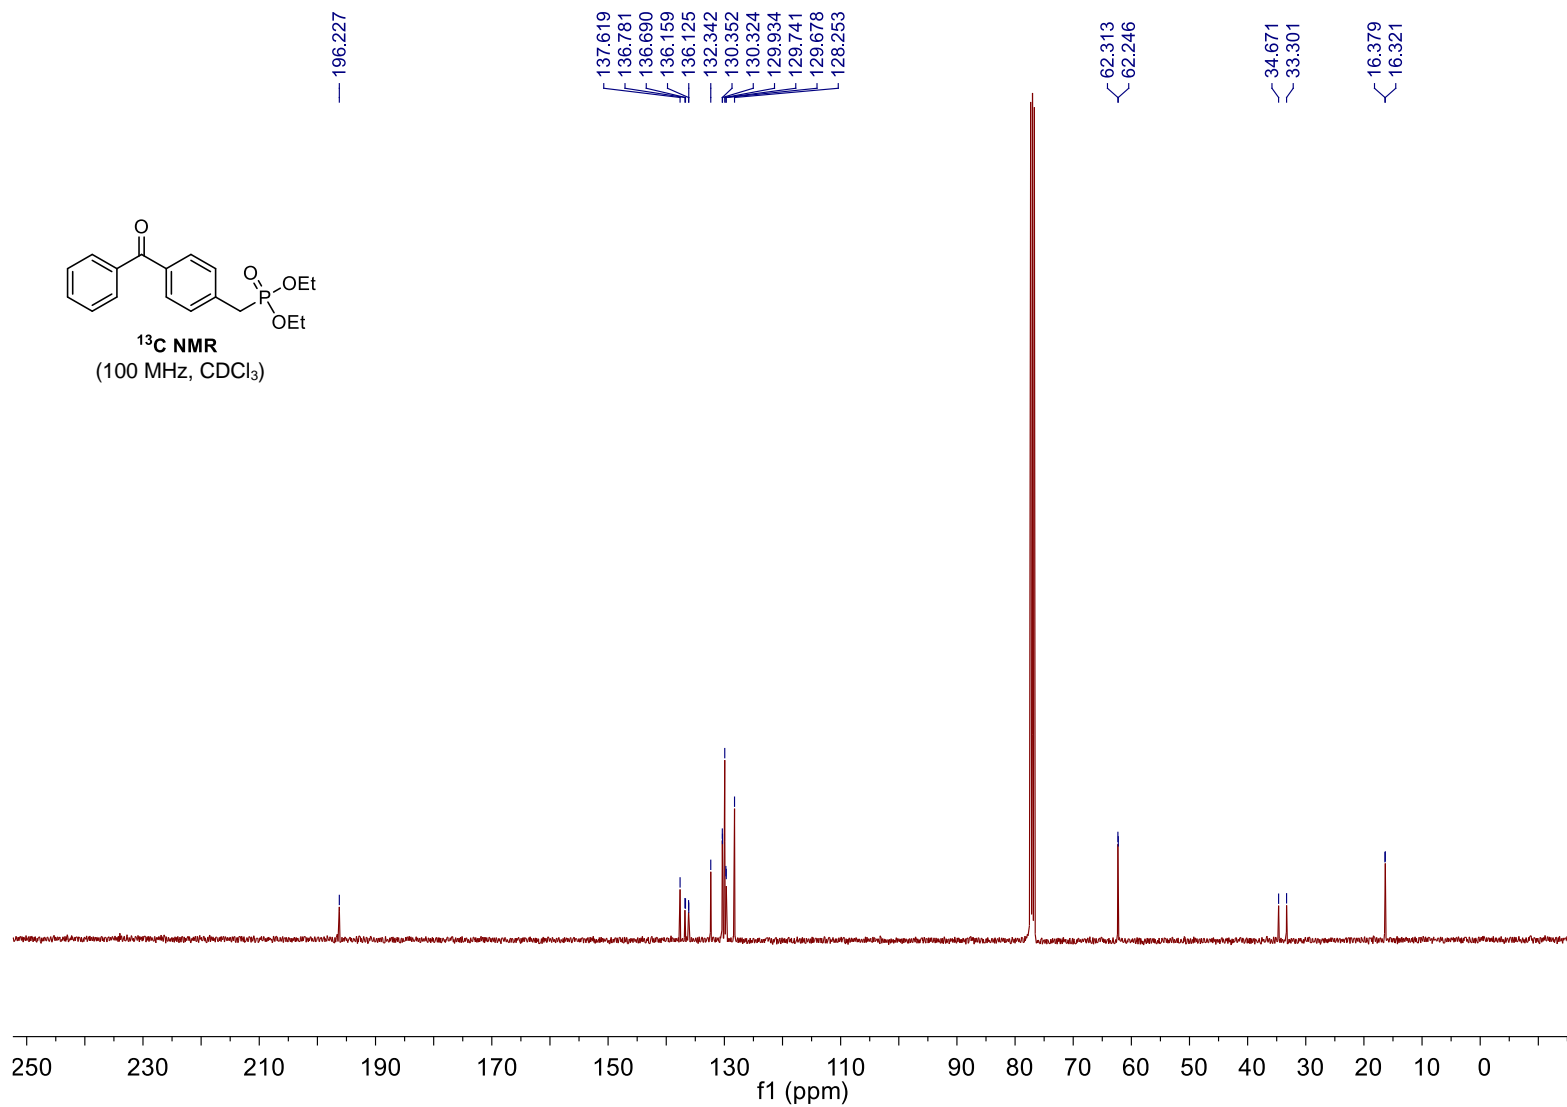



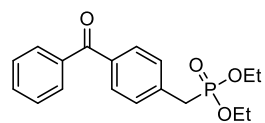

**<sup>31</sup>P NMR**  
(162 MHz, CDCl<sub>3</sub>)

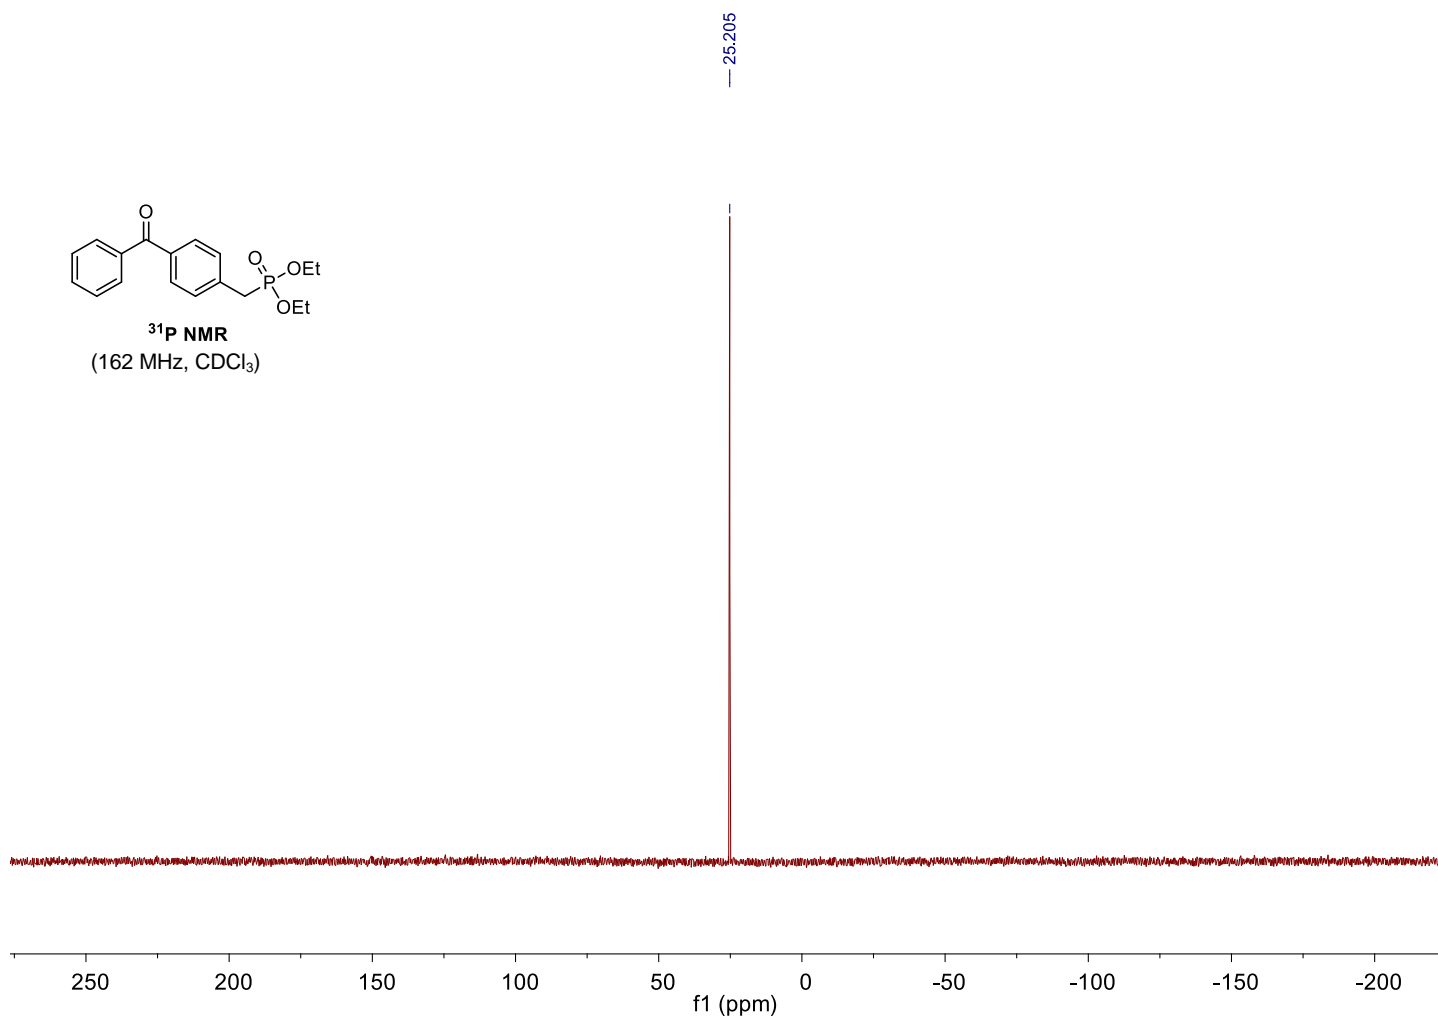

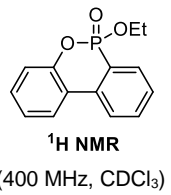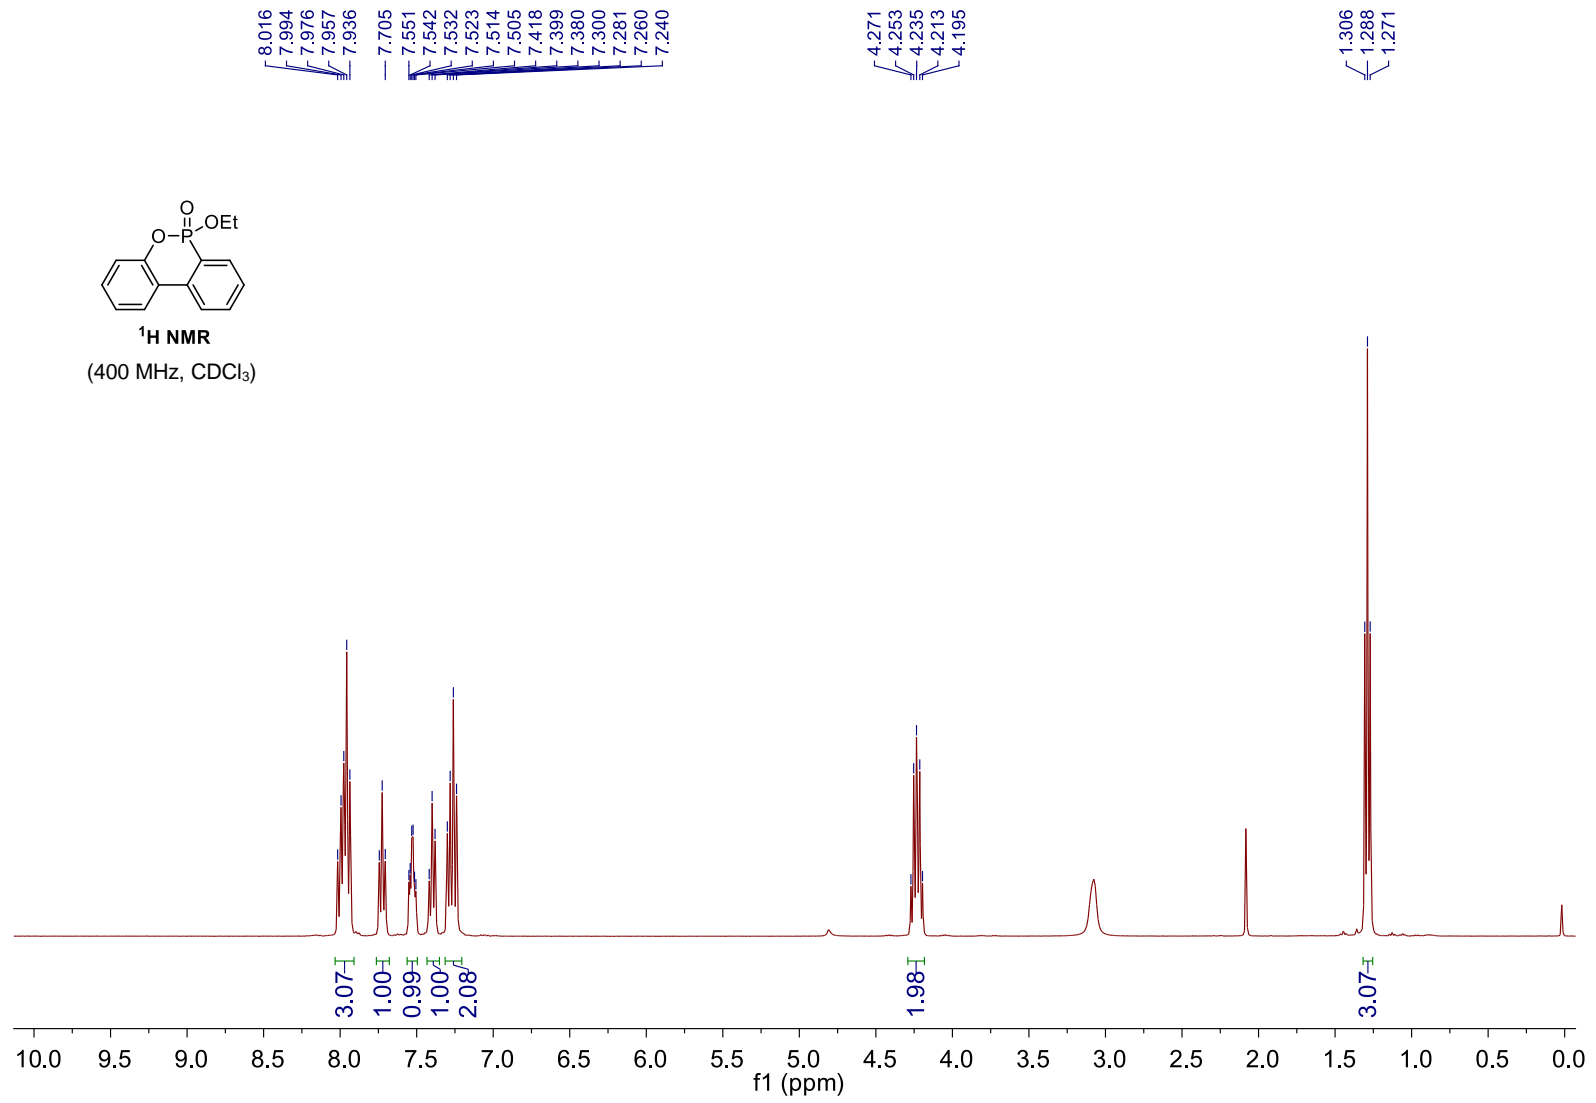

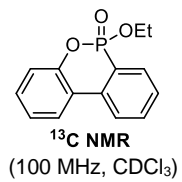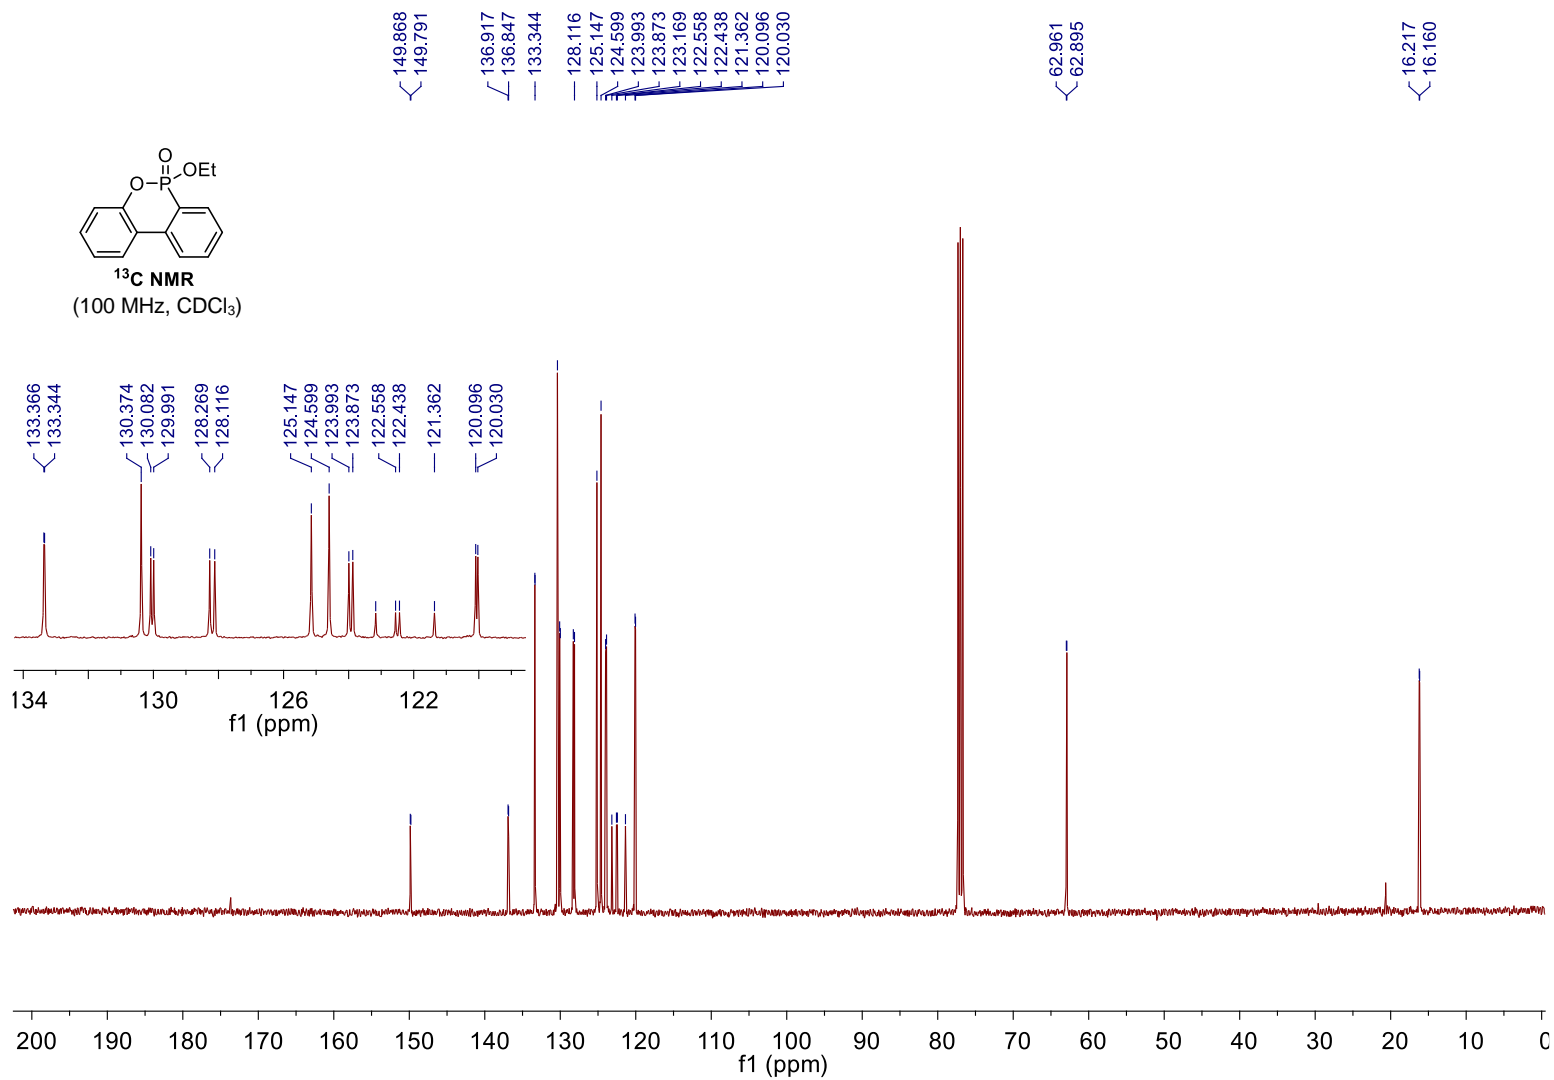

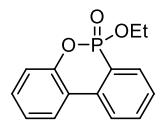

**<sup>31</sup>P NMR**  
(162 MHz, CDCl<sub>3</sub>)

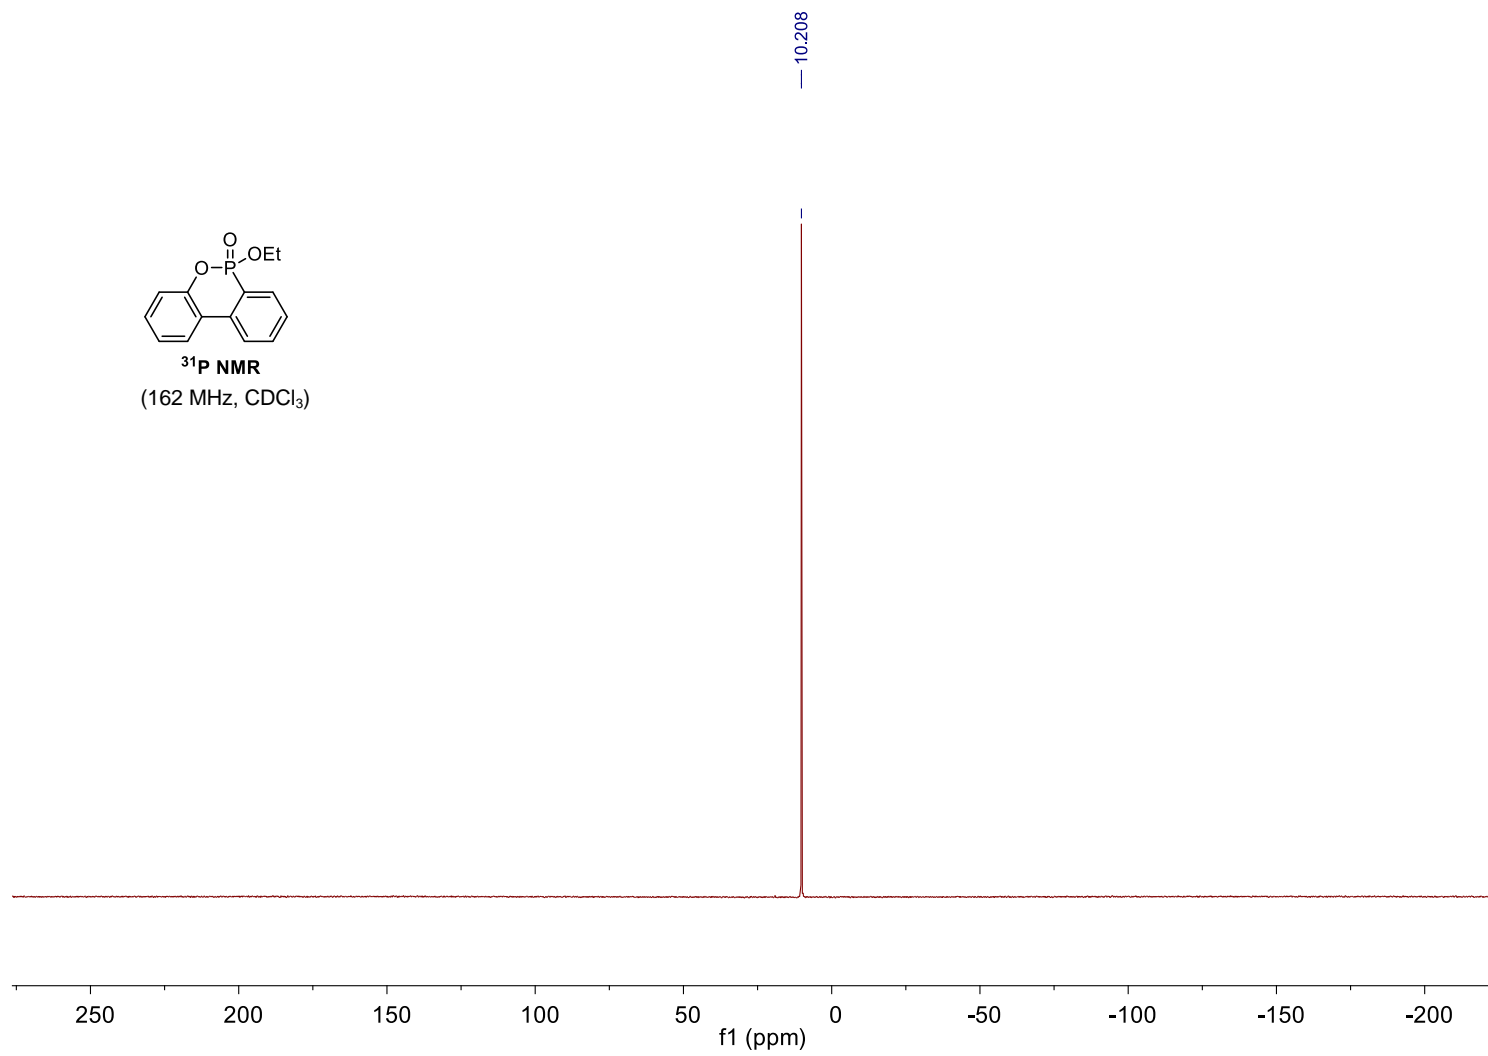

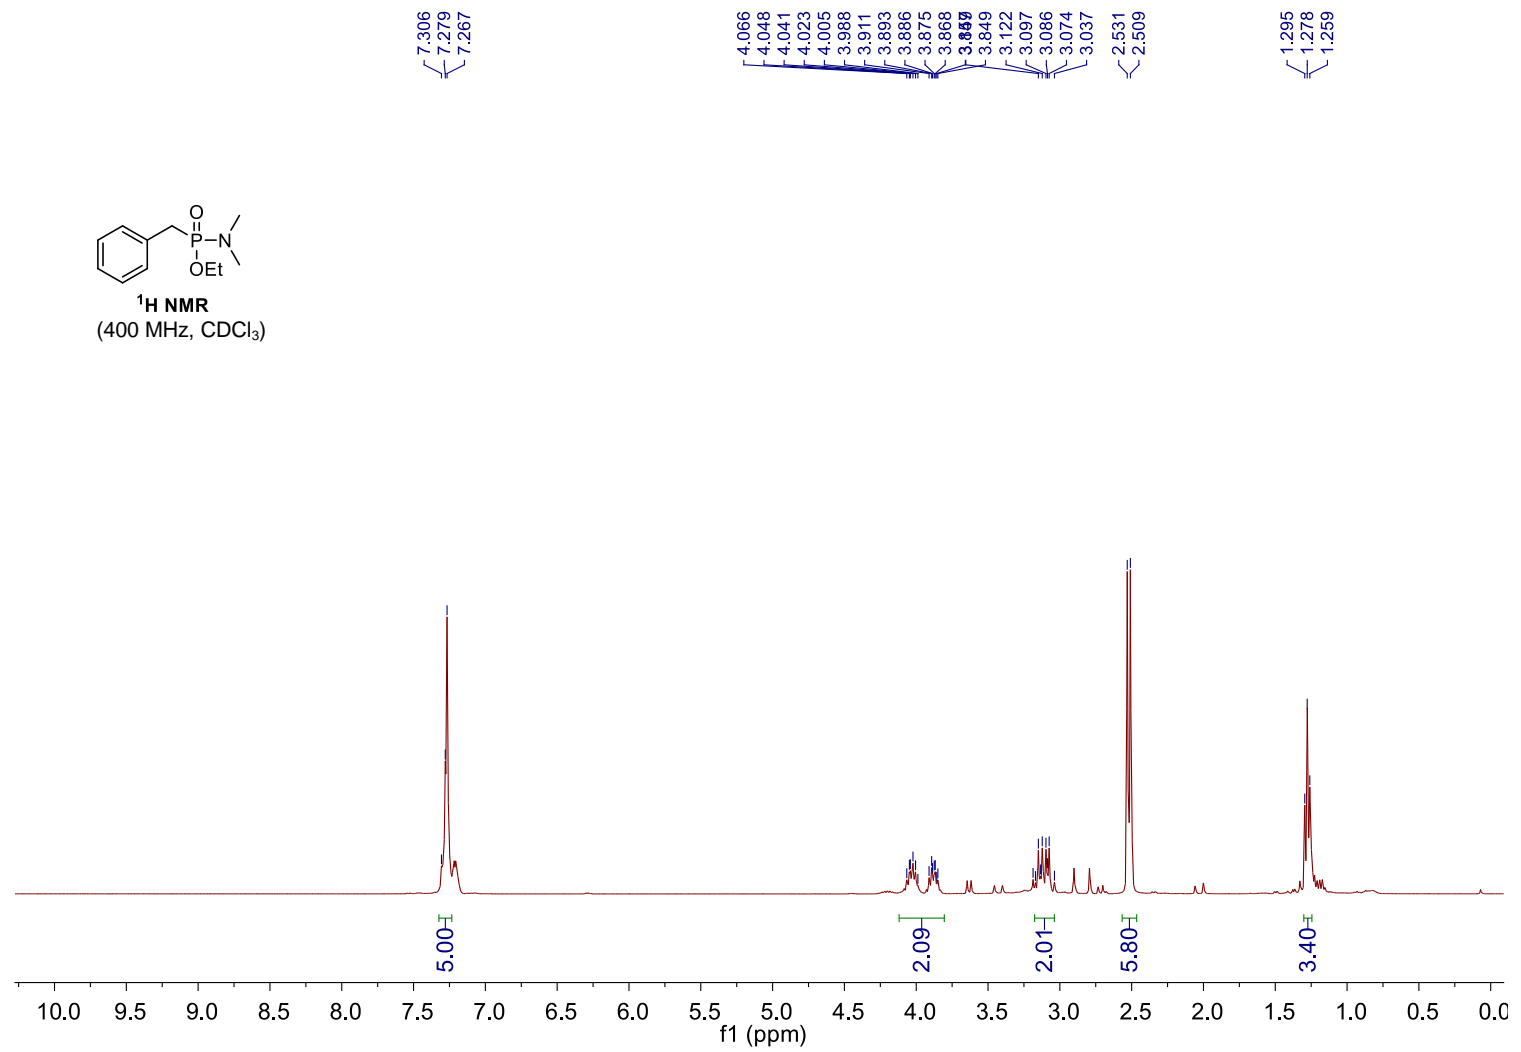

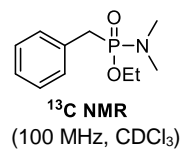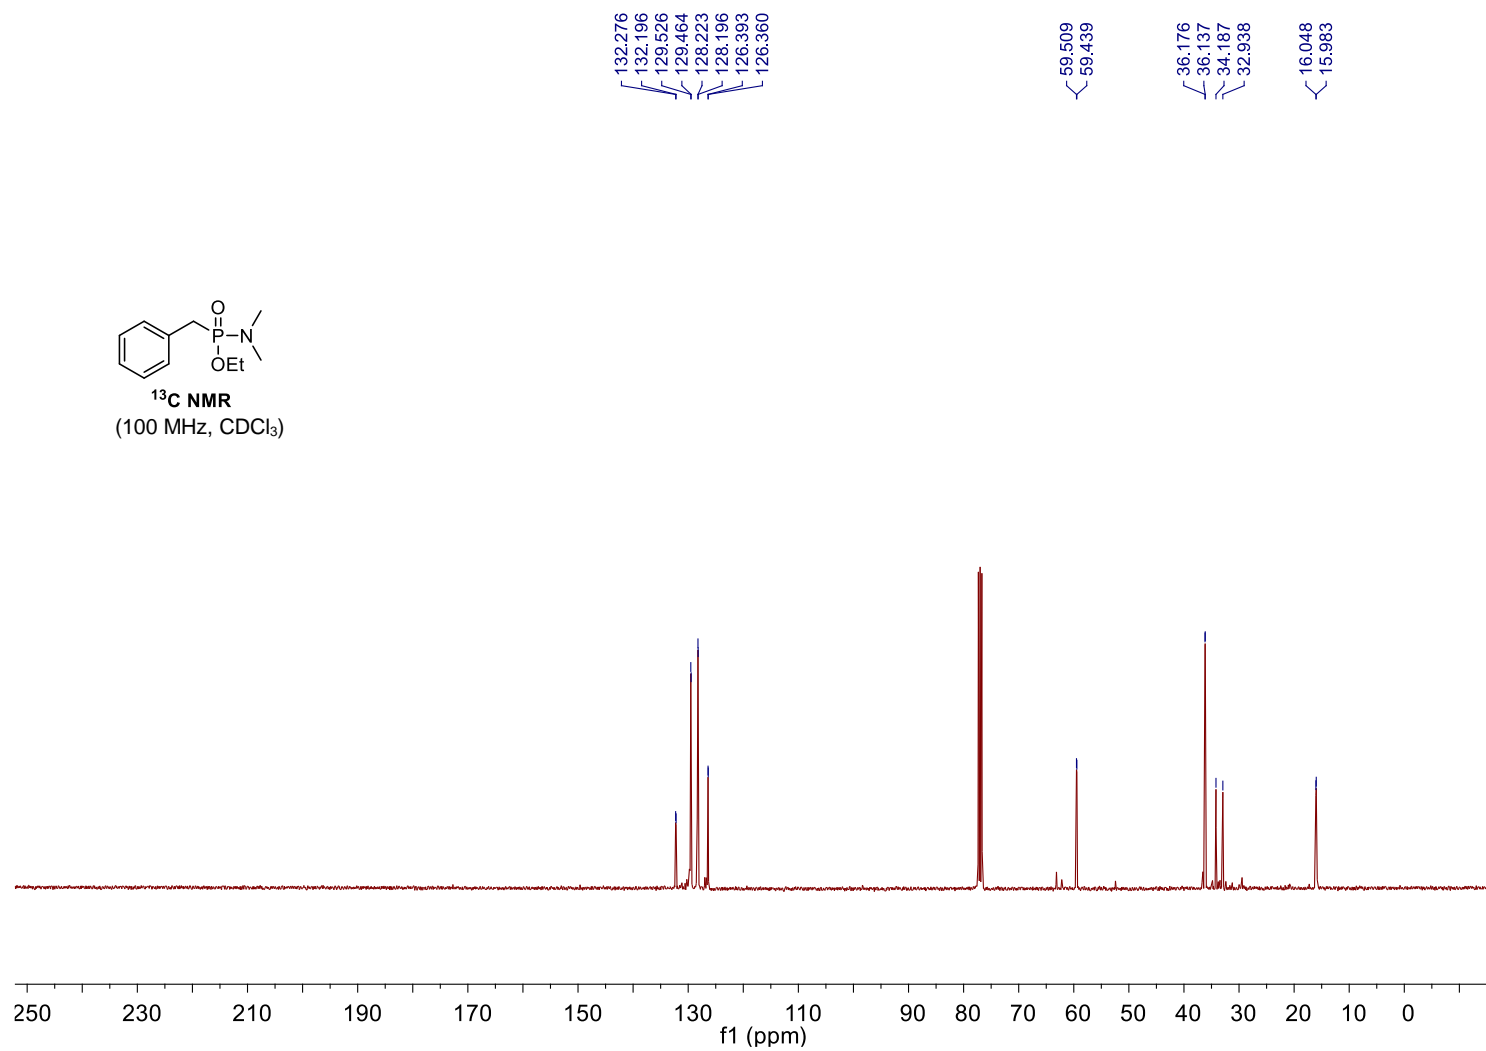

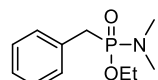

<sup>31</sup>P NMR  
(162 MHz, CDCl<sub>3</sub>)

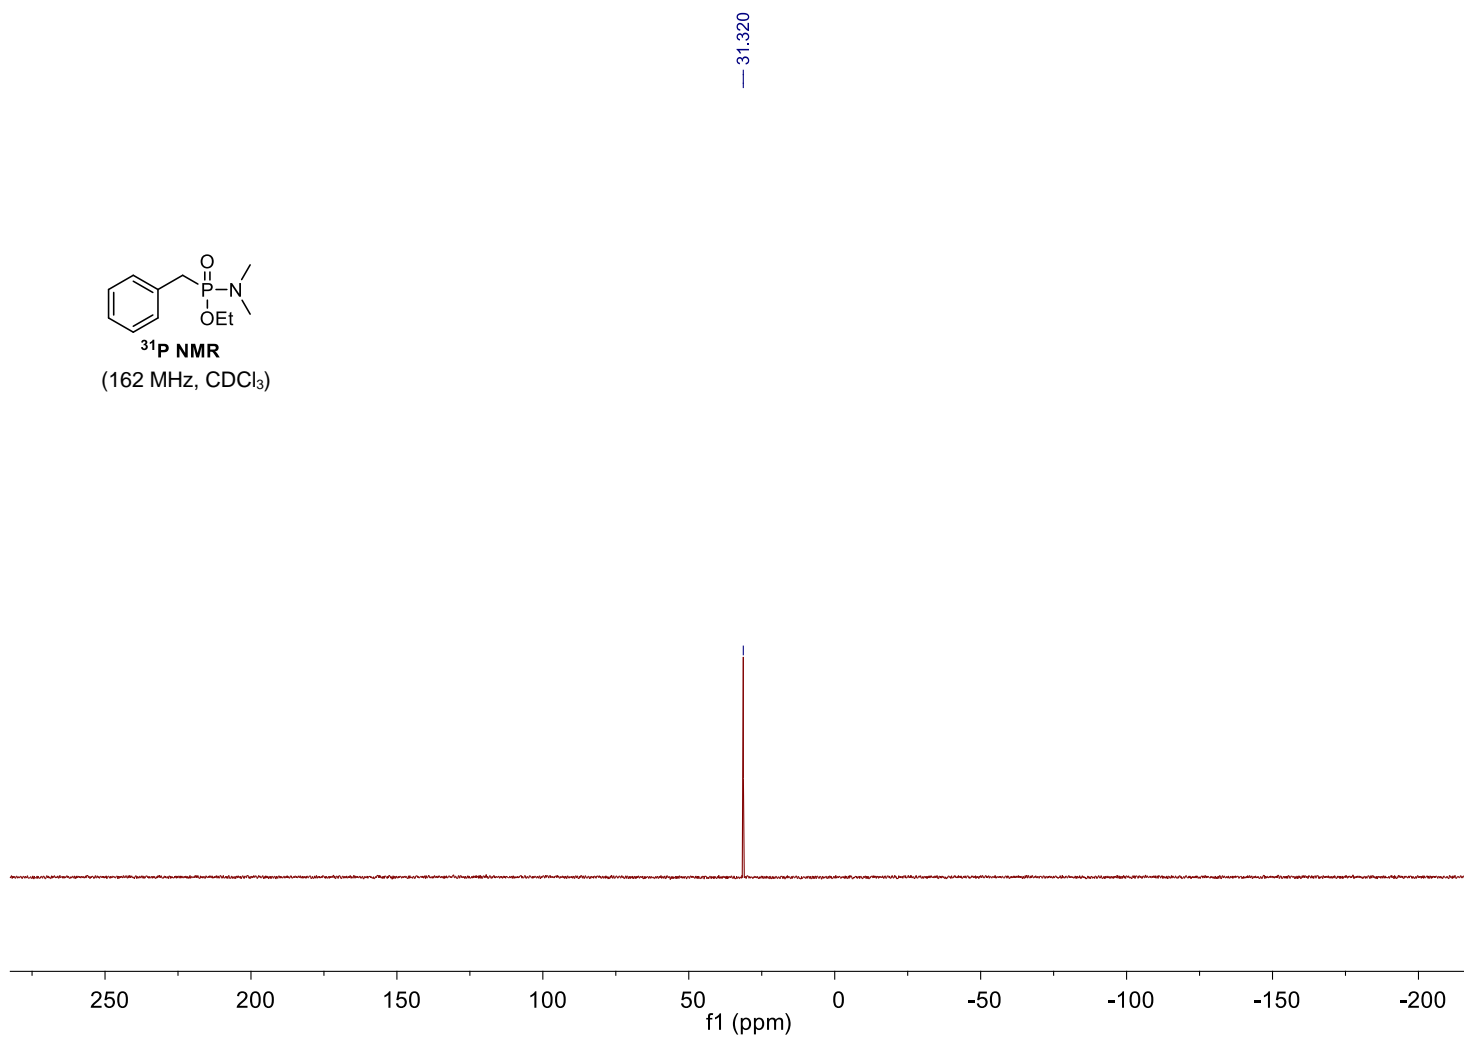

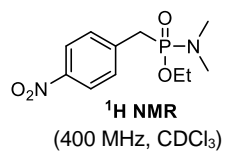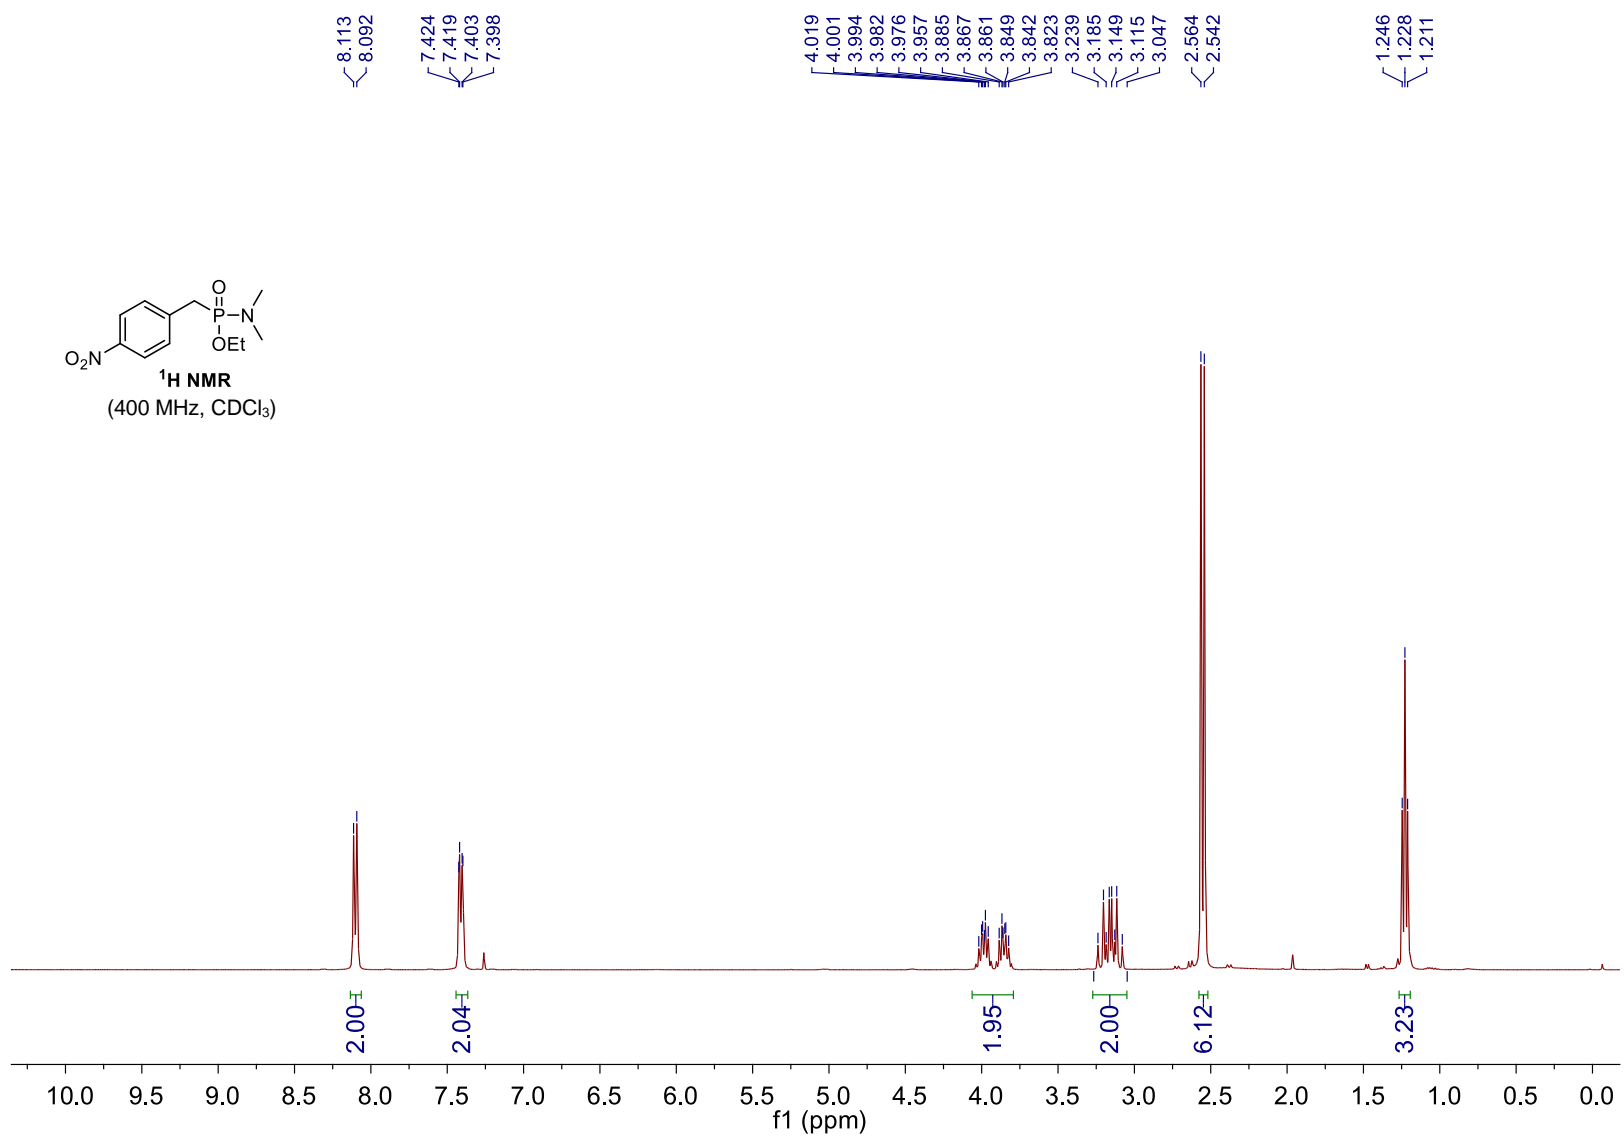



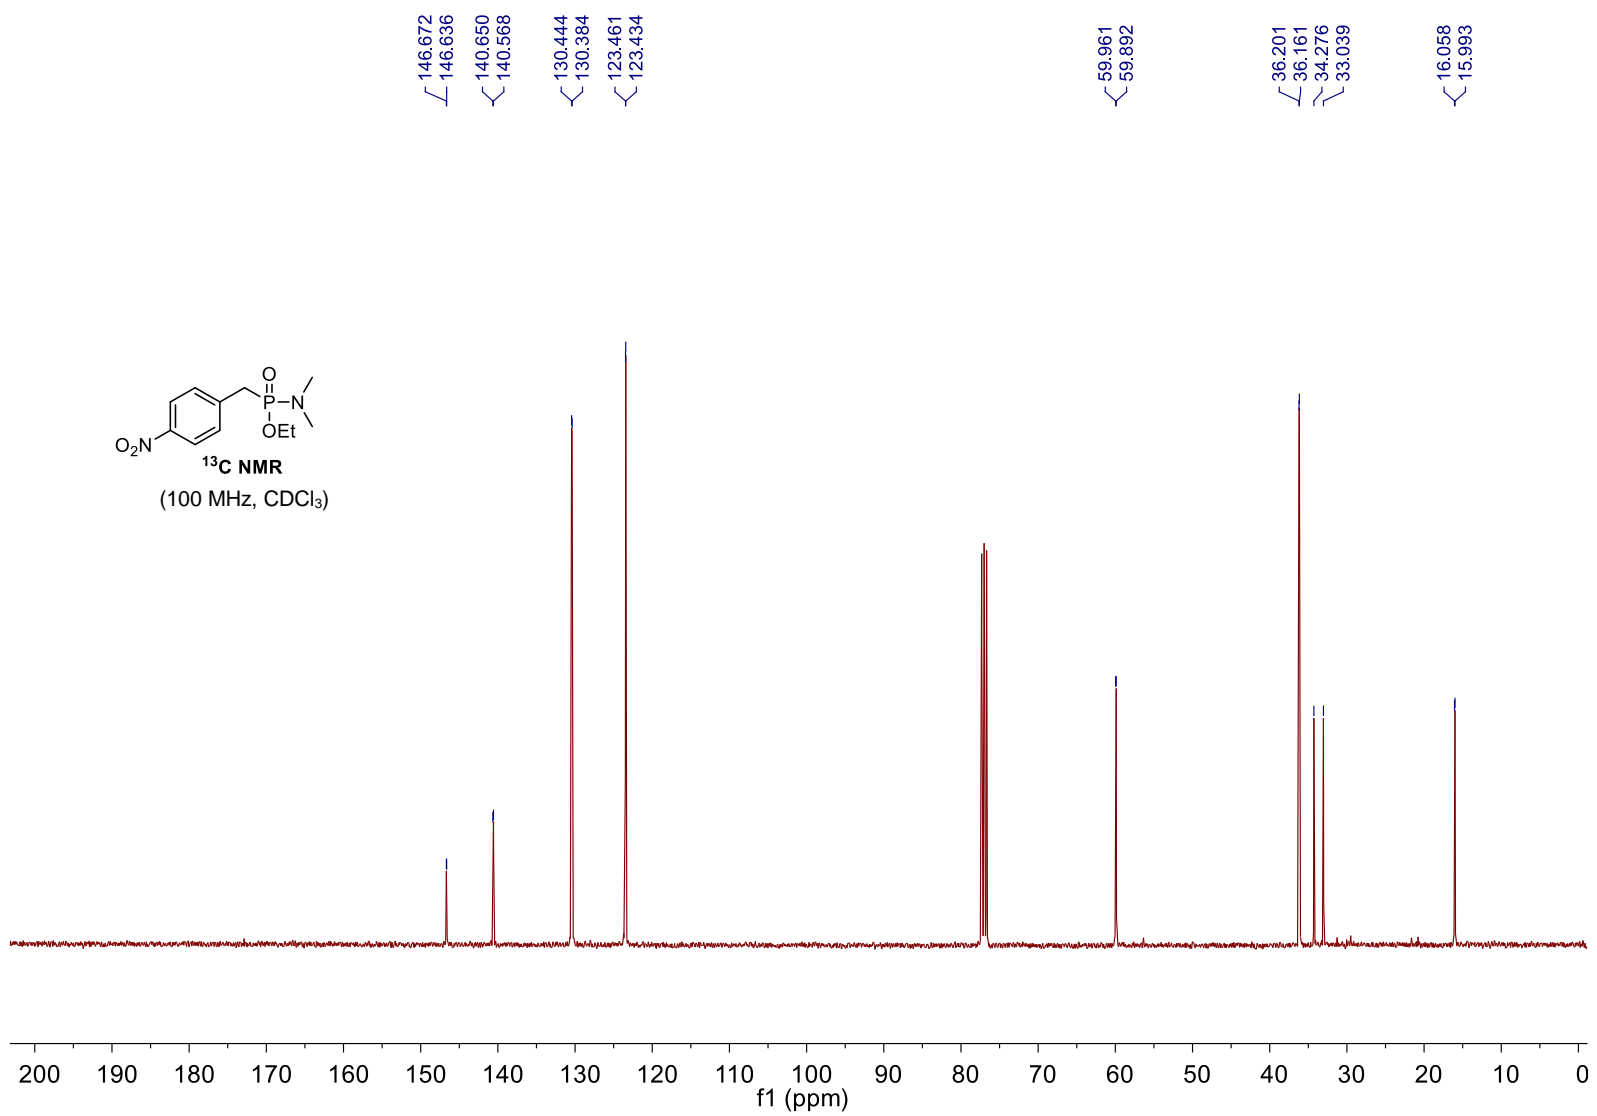

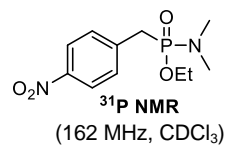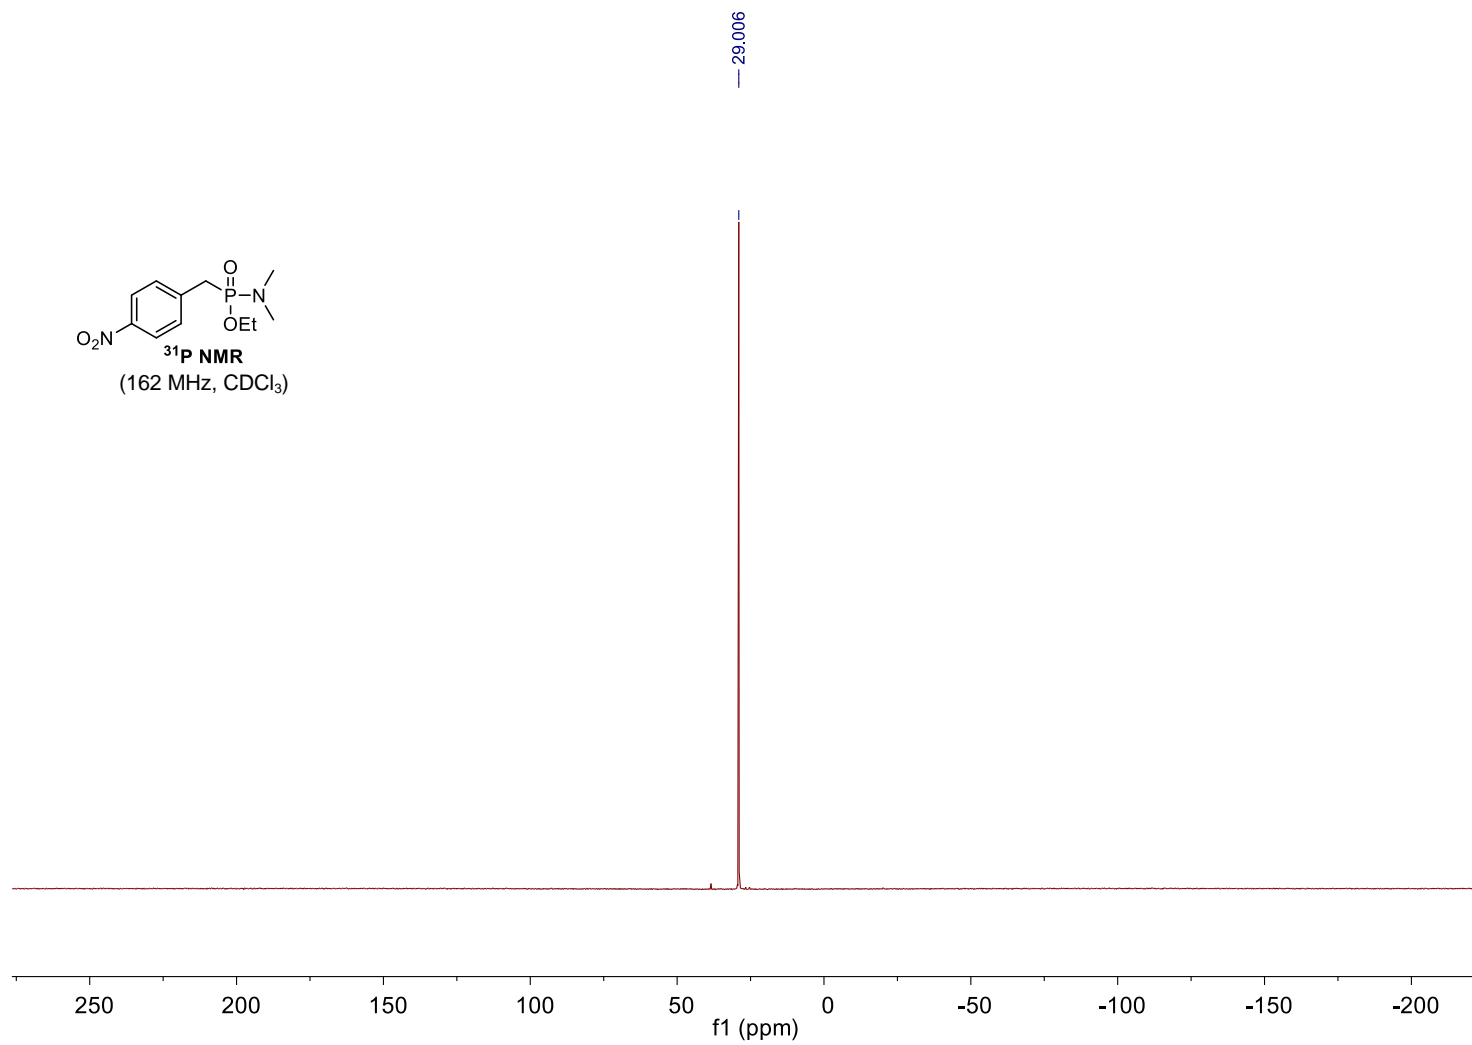

S178

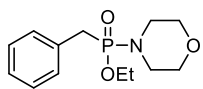

**<sup>1</sup>H NMR**  
(400 MHz, CDCl<sub>3</sub>)

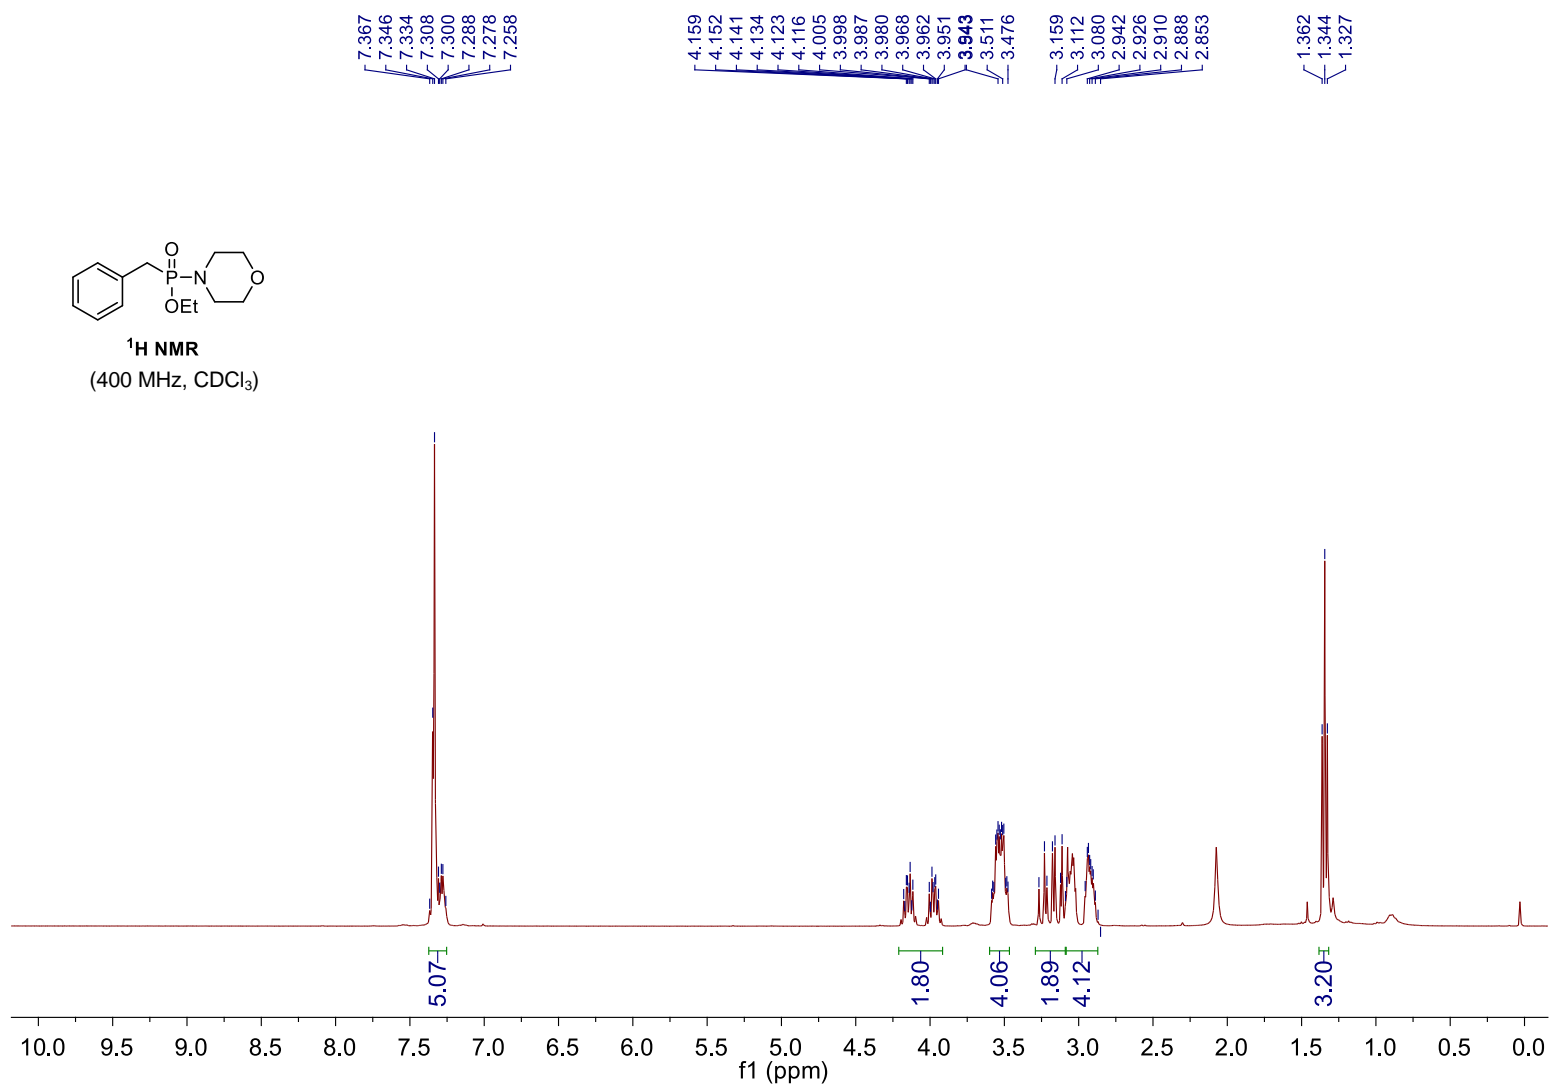

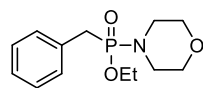

**<sup>13</sup>C NMR**  
(100 MHz, CDCl<sub>3</sub>)

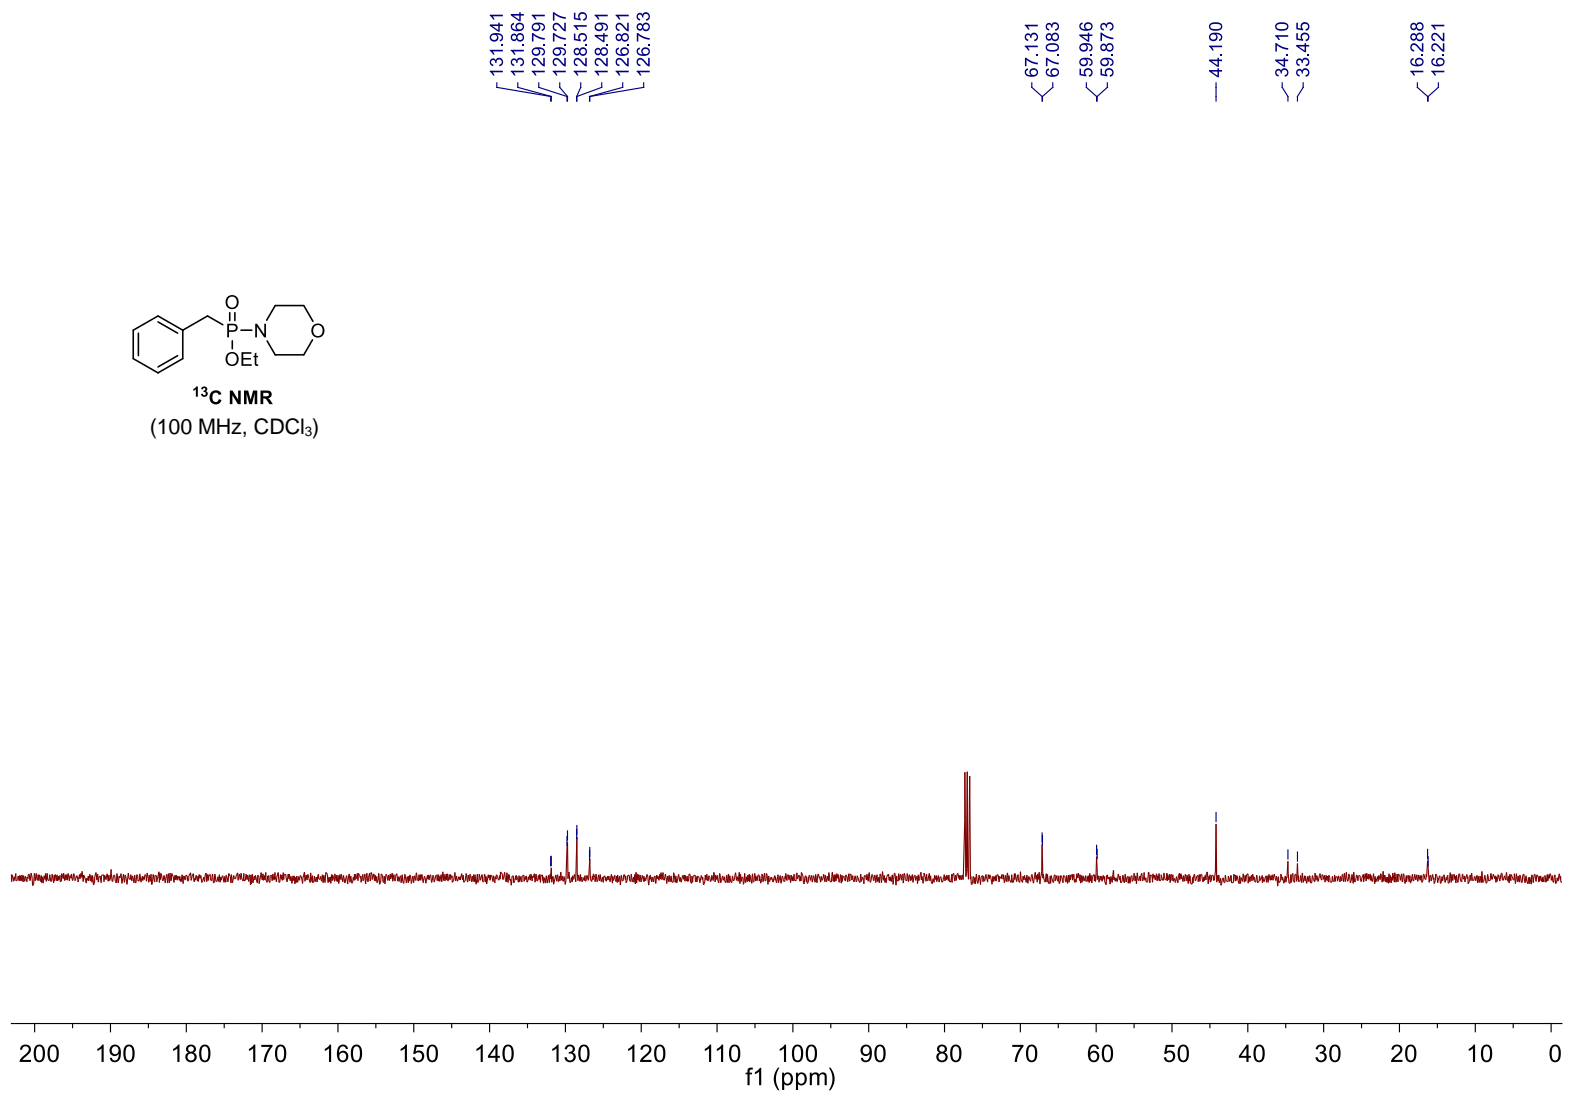

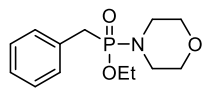

**<sup>31</sup>P NMR**  
(162 MHz, CDCl<sub>3</sub>)

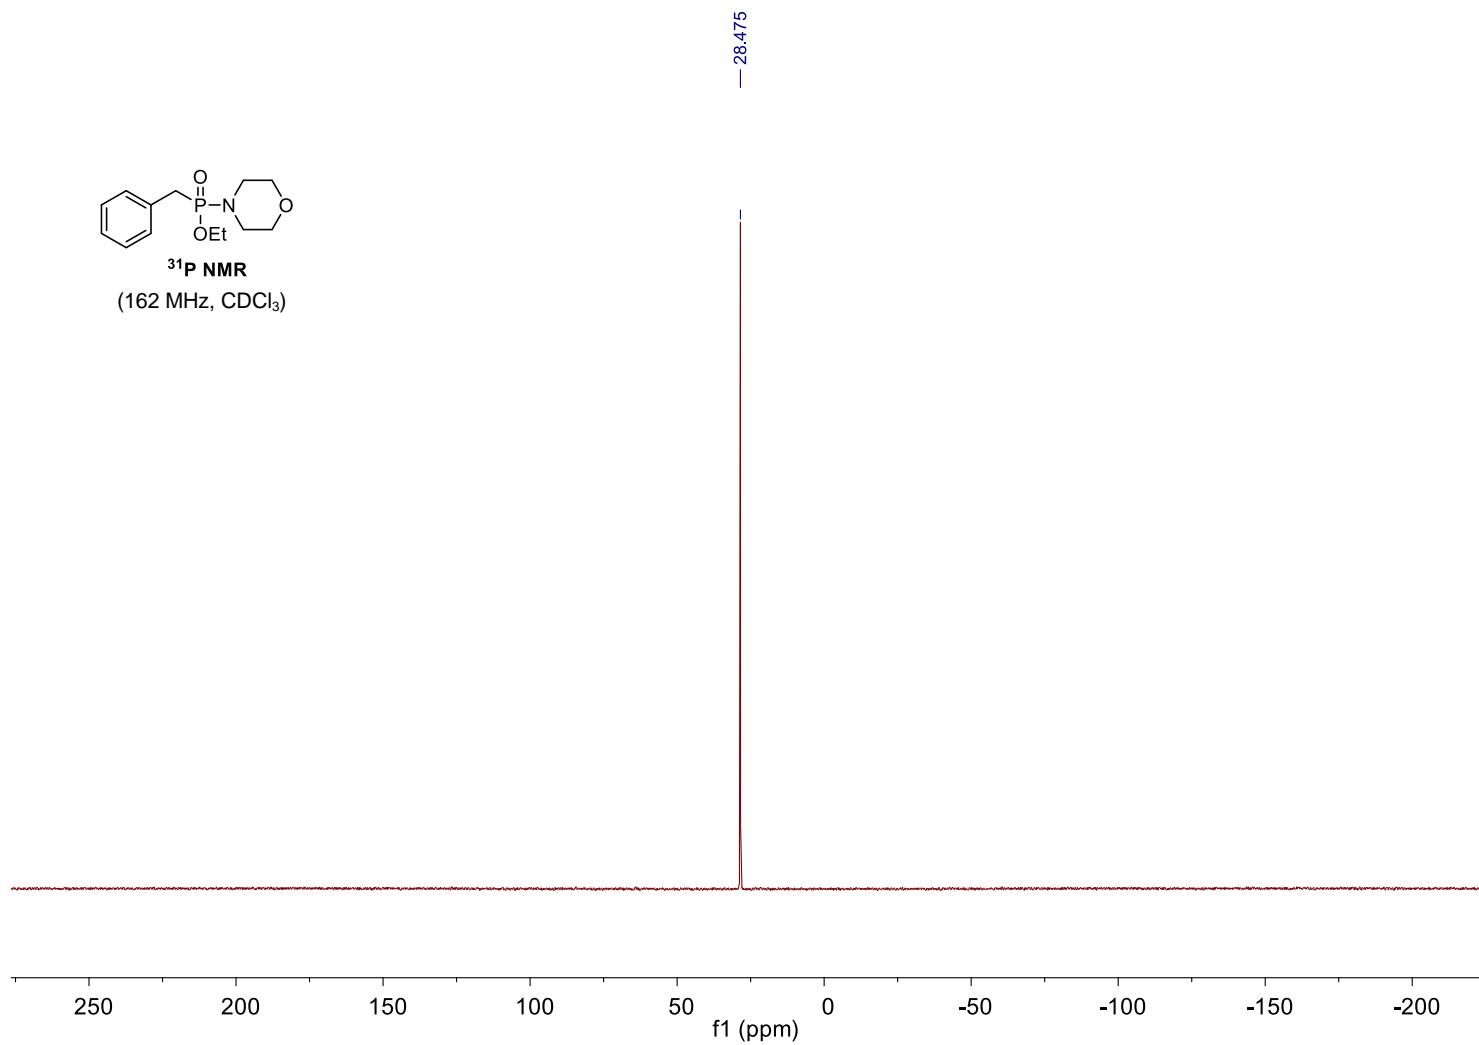

S181

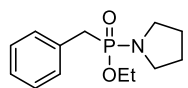

<sup>1</sup>H NMR  
(400 MHz, CDCl<sub>3</sub>)

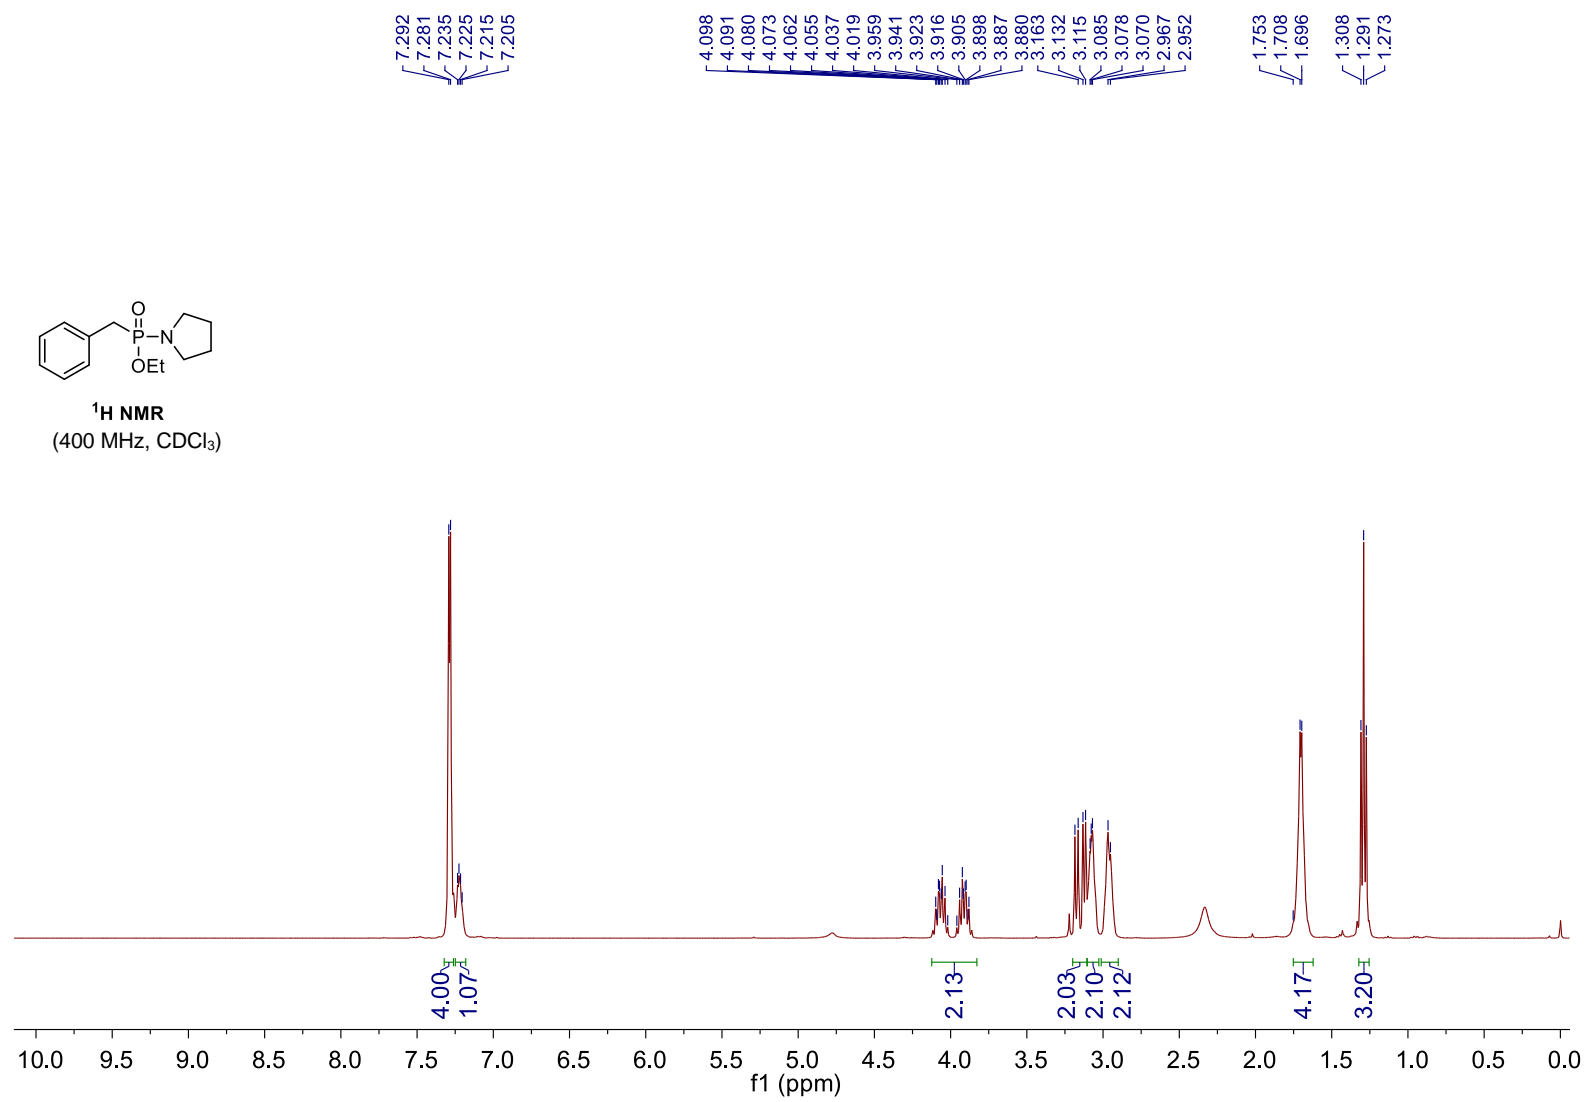

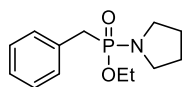

**<sup>13</sup>C NMR**  
(100 MHz, CDCl<sub>3</sub>)

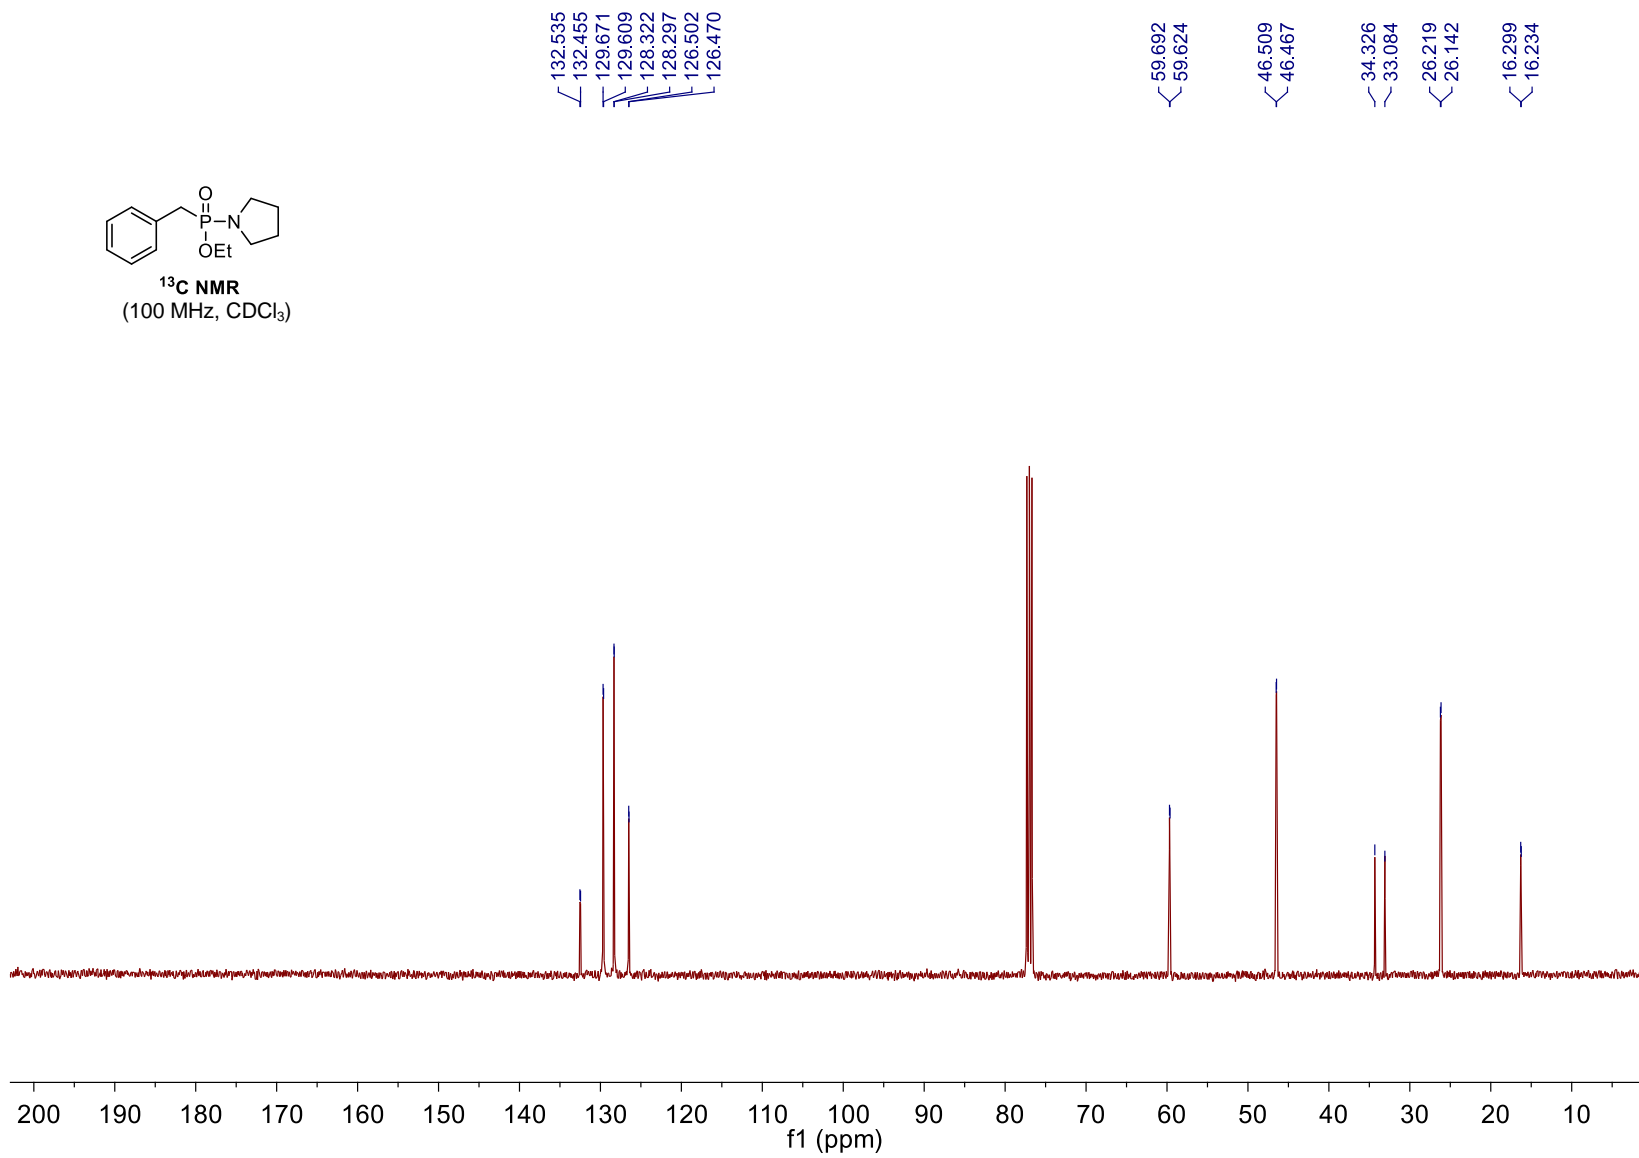

S183

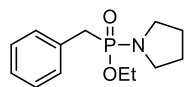

<sup>31</sup>P NMR  
(162 MHz, CDCl<sub>3</sub>)

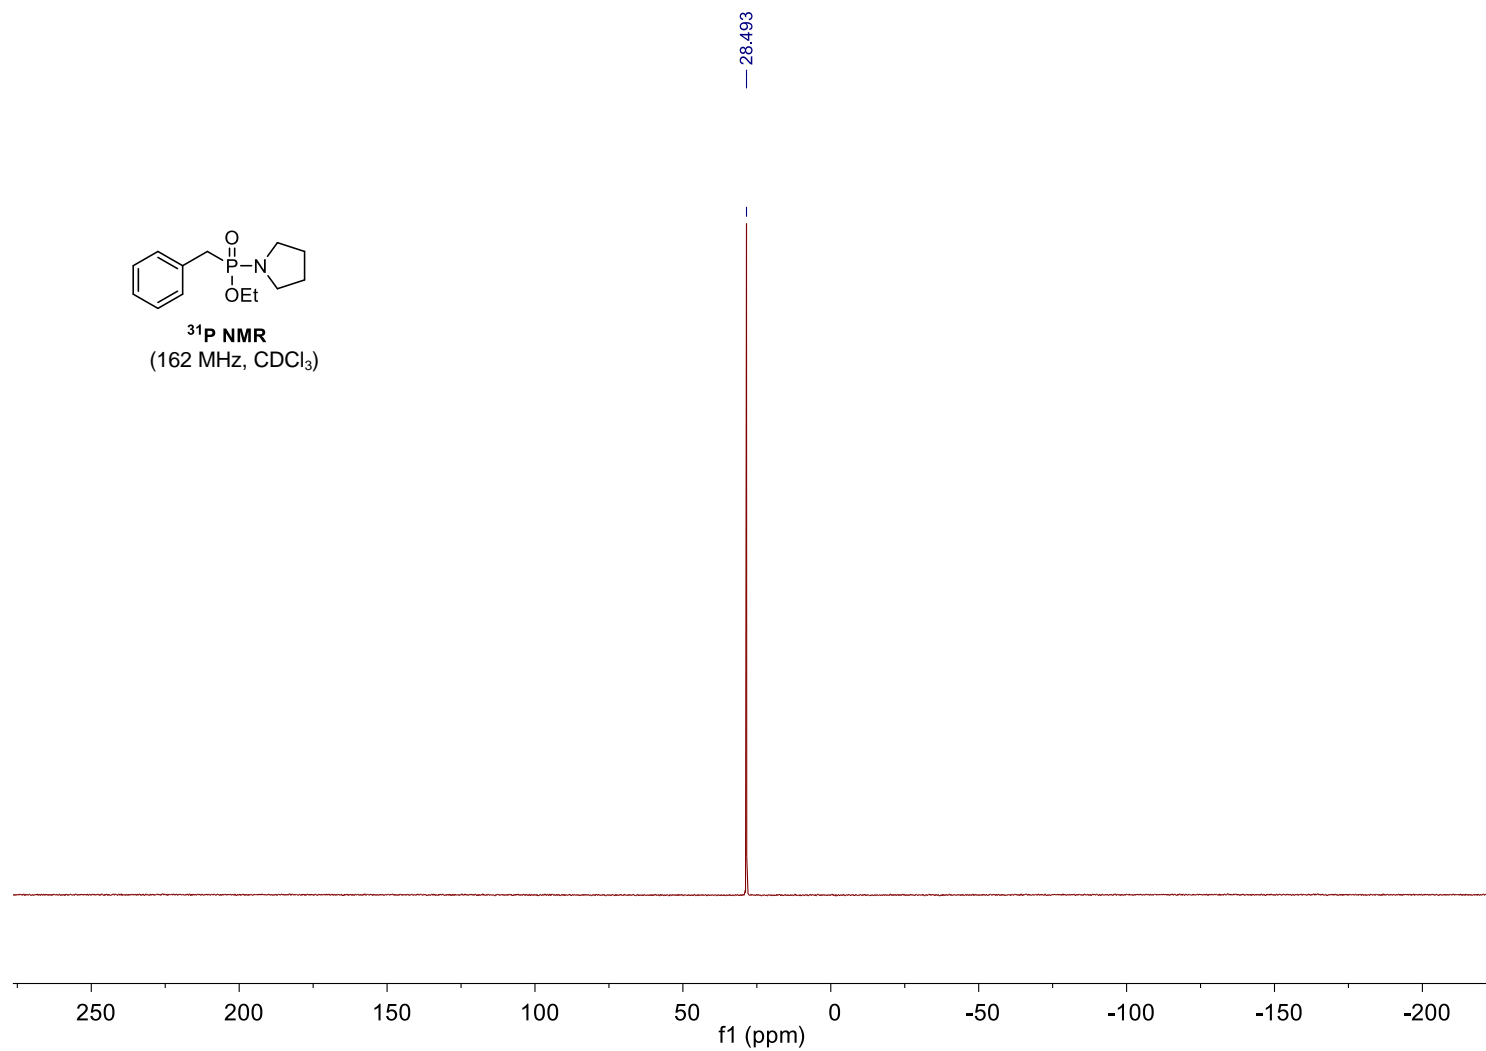



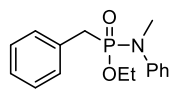

**<sup>1</sup>H NMR**  
(400 MHz, CDCl<sub>3</sub>)

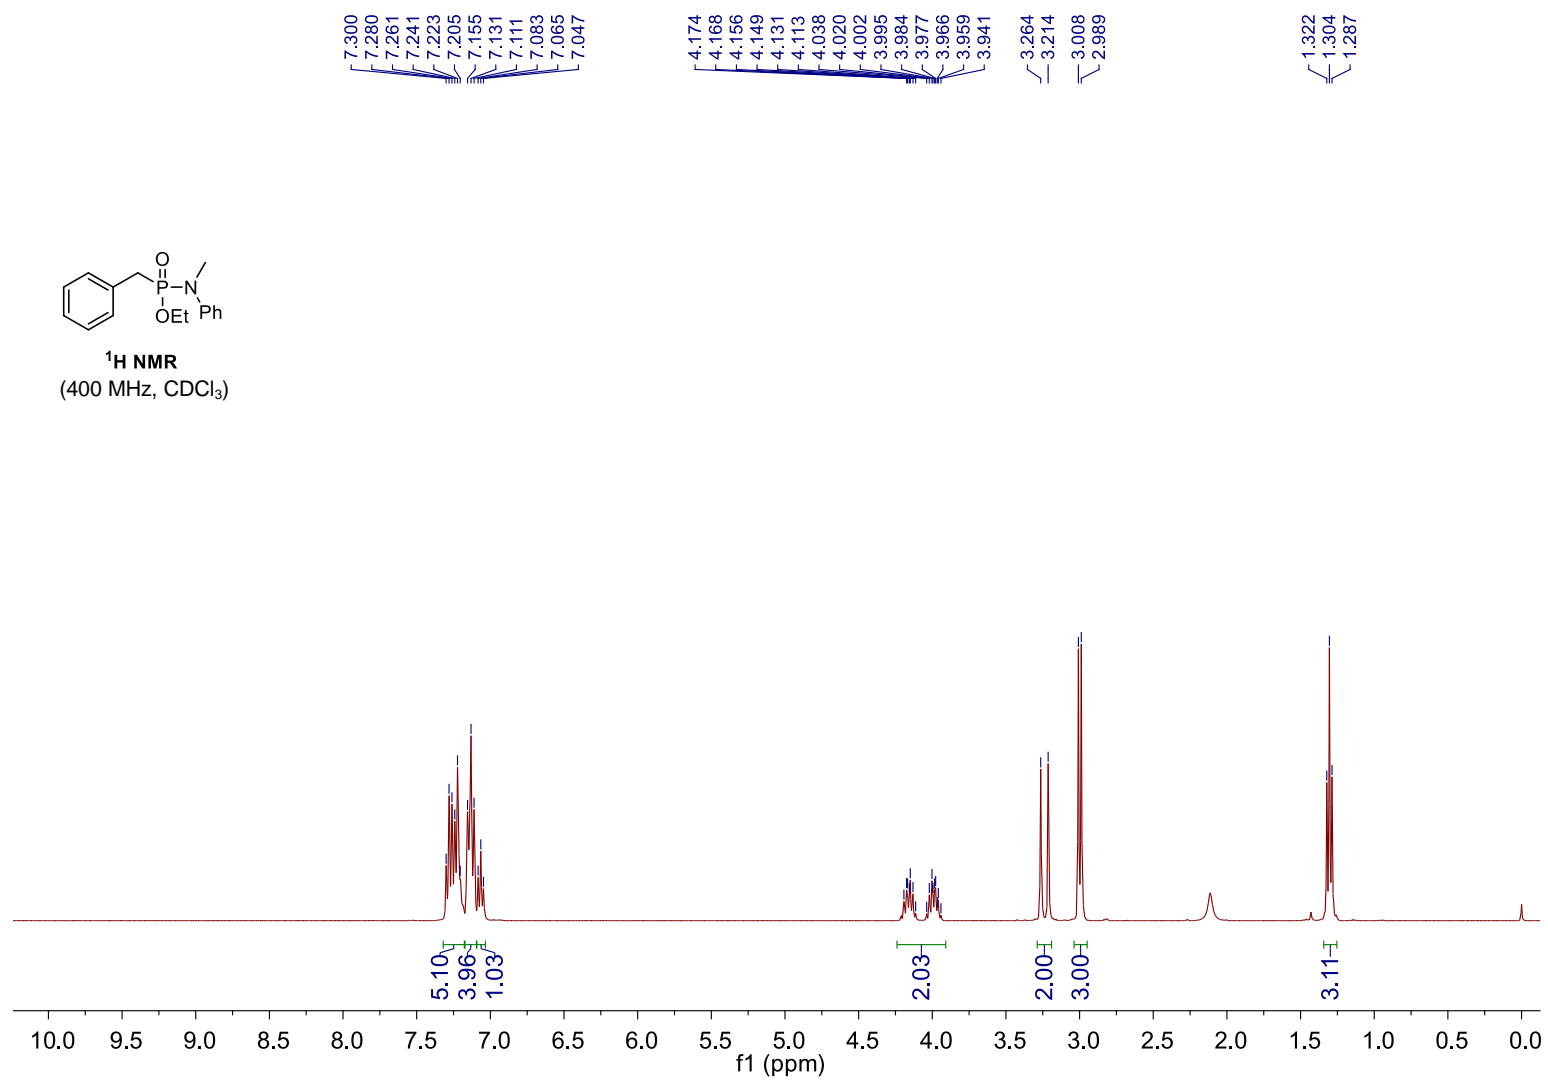

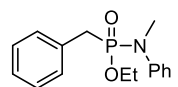

<sup>13</sup>C NMR  
(100 MHz, CDCl<sub>3</sub>)

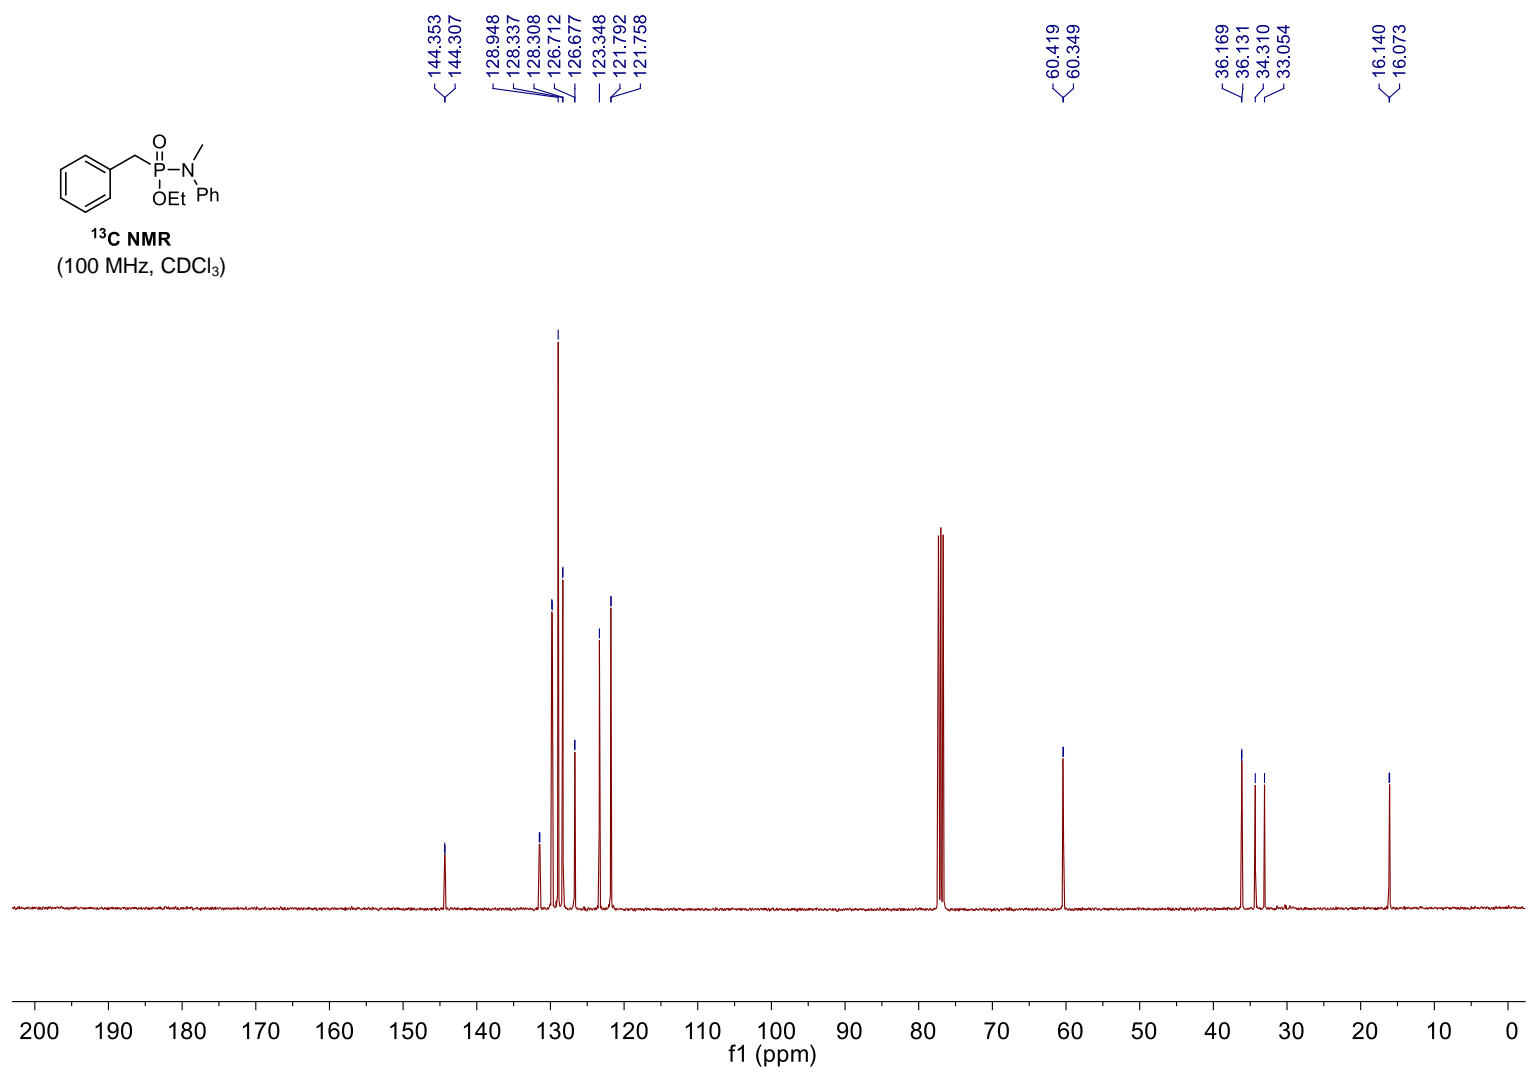

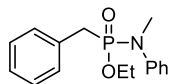

**<sup>31</sup>P NMR**  
(162 MHz, CDCl<sub>3</sub>)

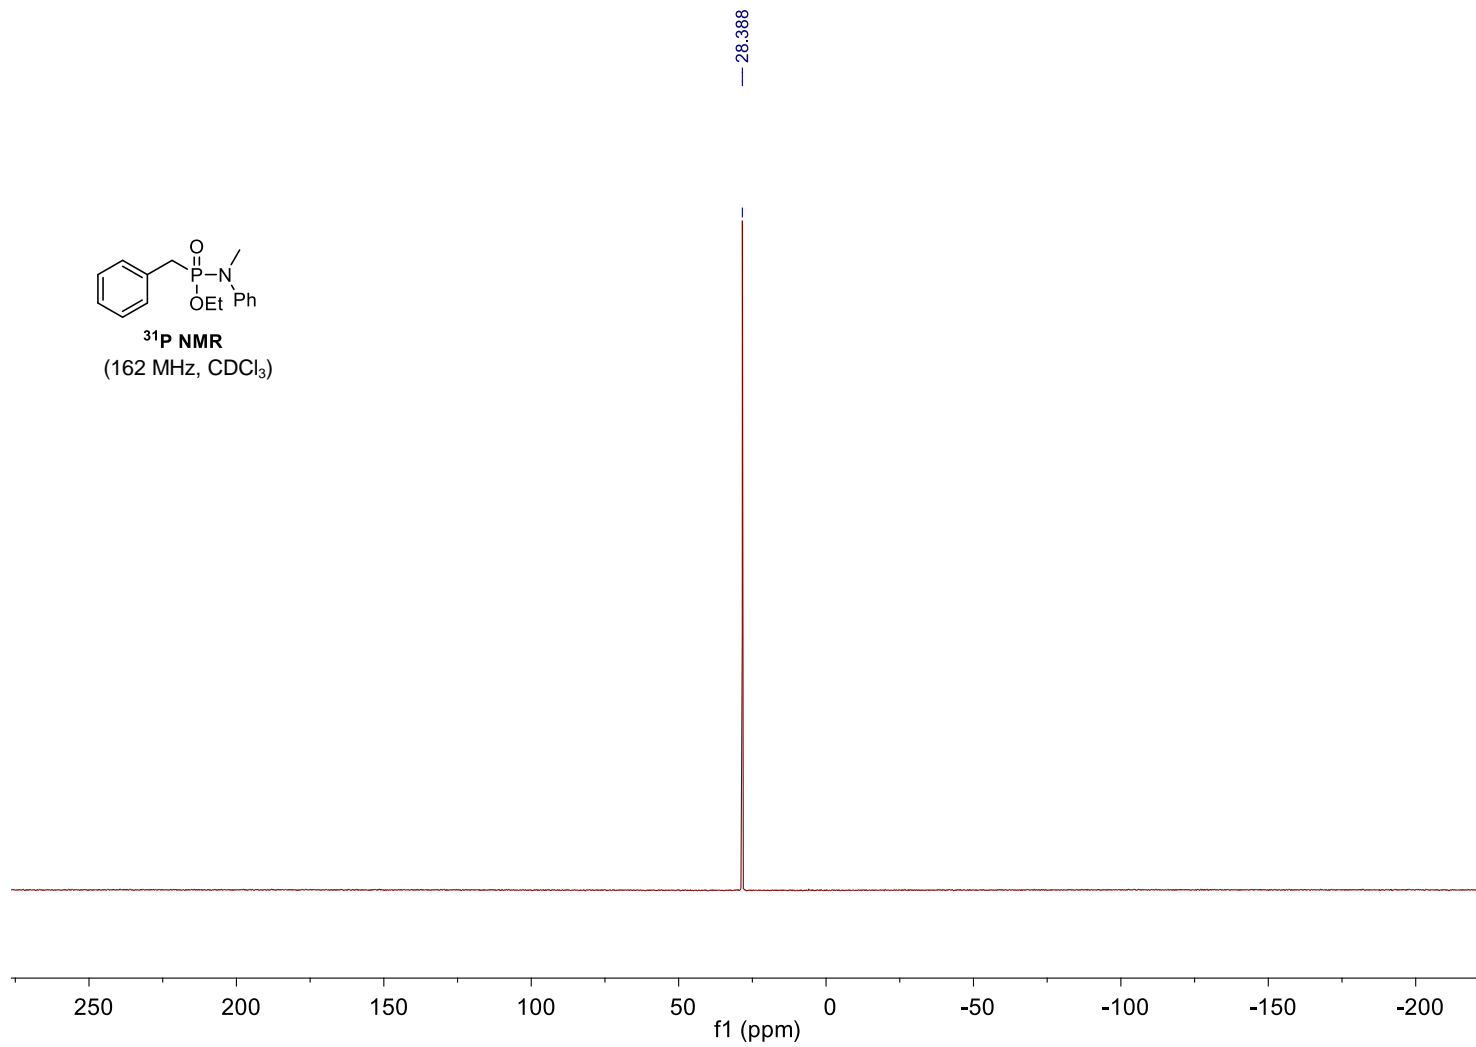

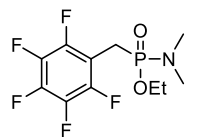

<sup>1</sup>H NMR  
(400 MHz, CDCl<sub>3</sub>)

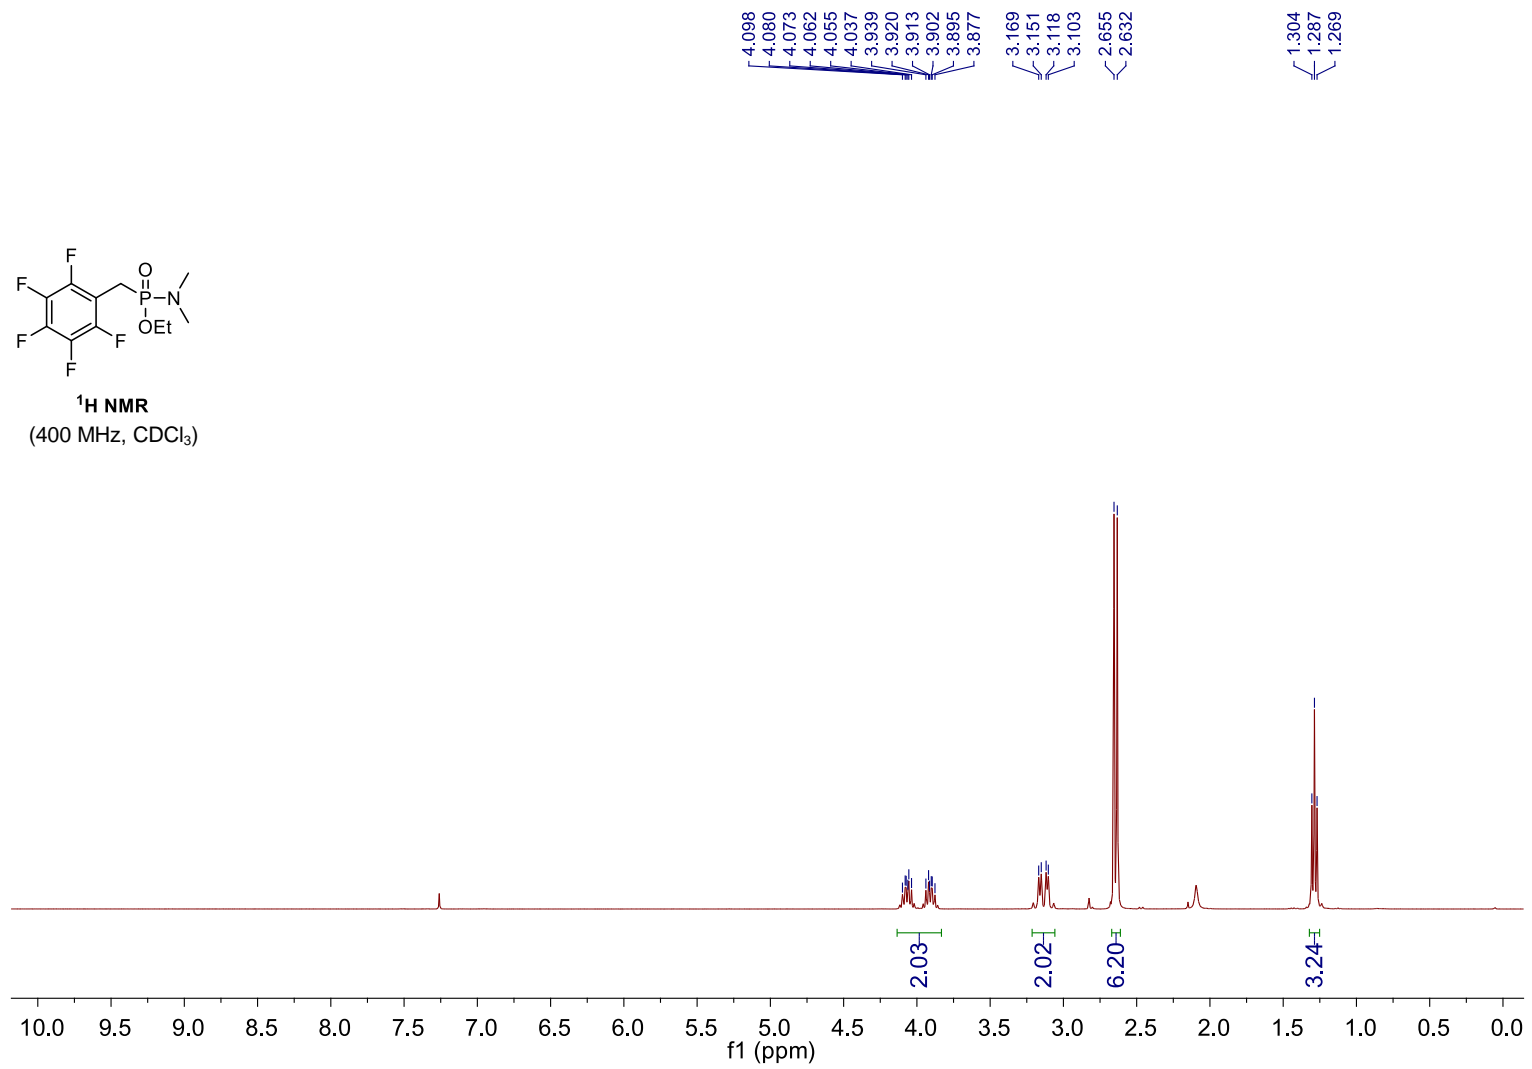

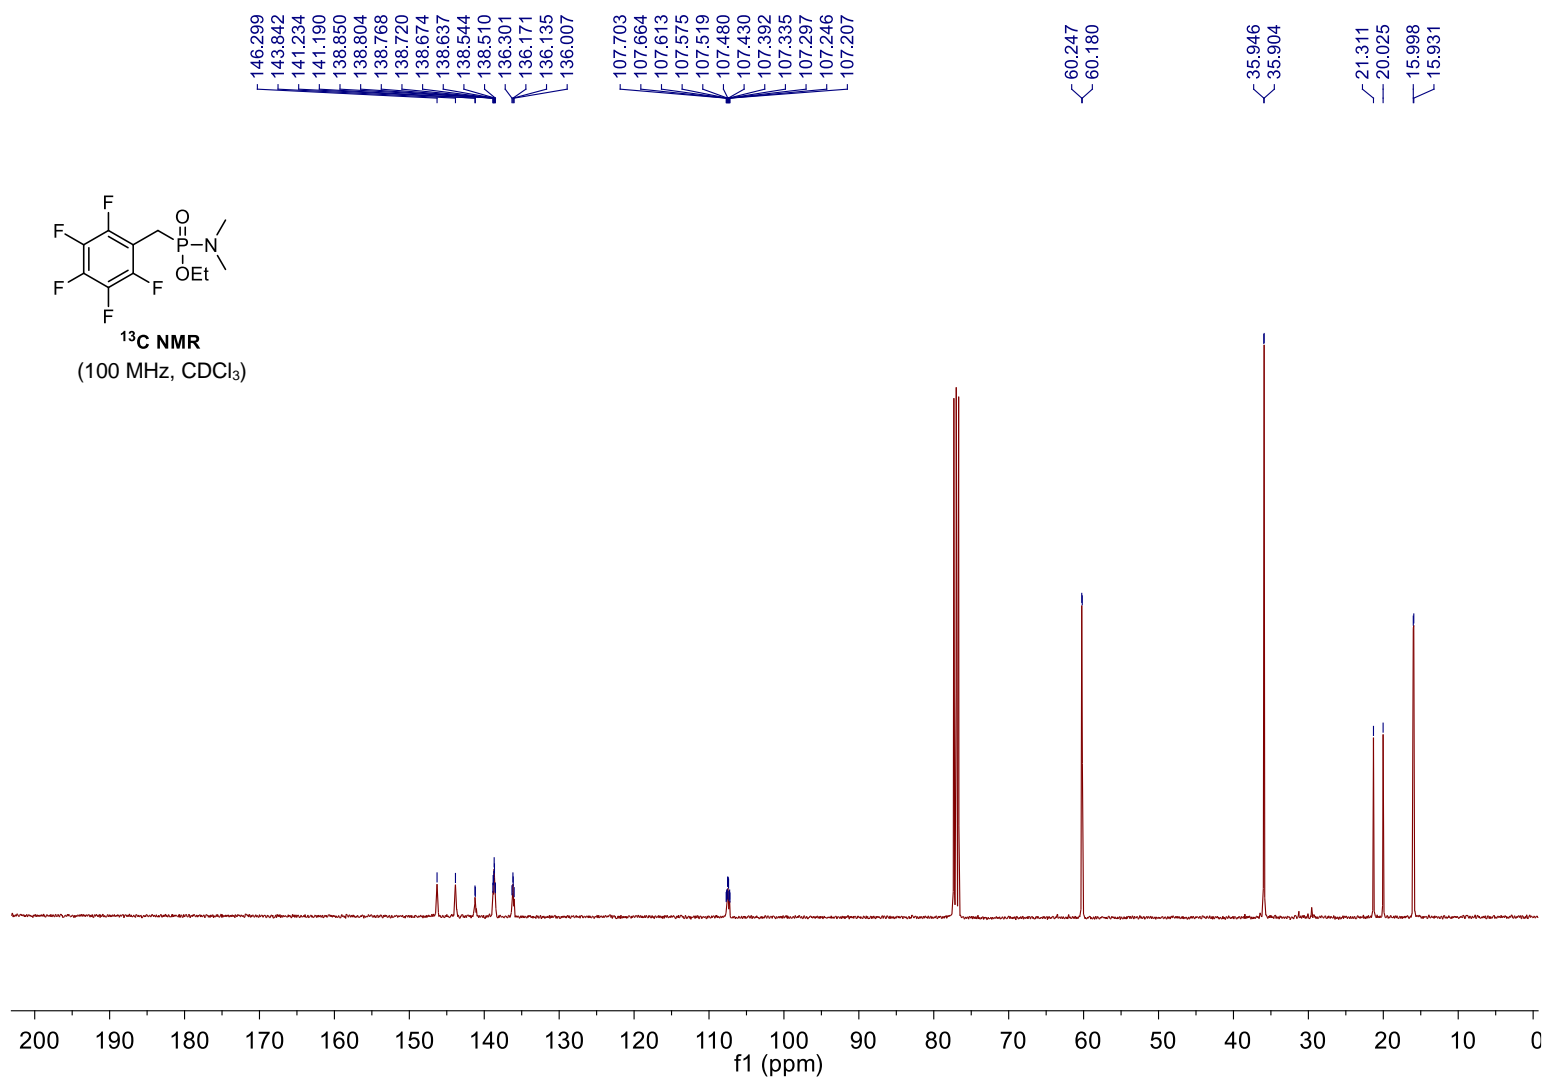

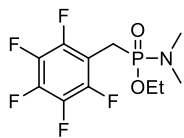

**<sup>31</sup>P NMR**  
(162 MHz, CDCl<sub>3</sub>)

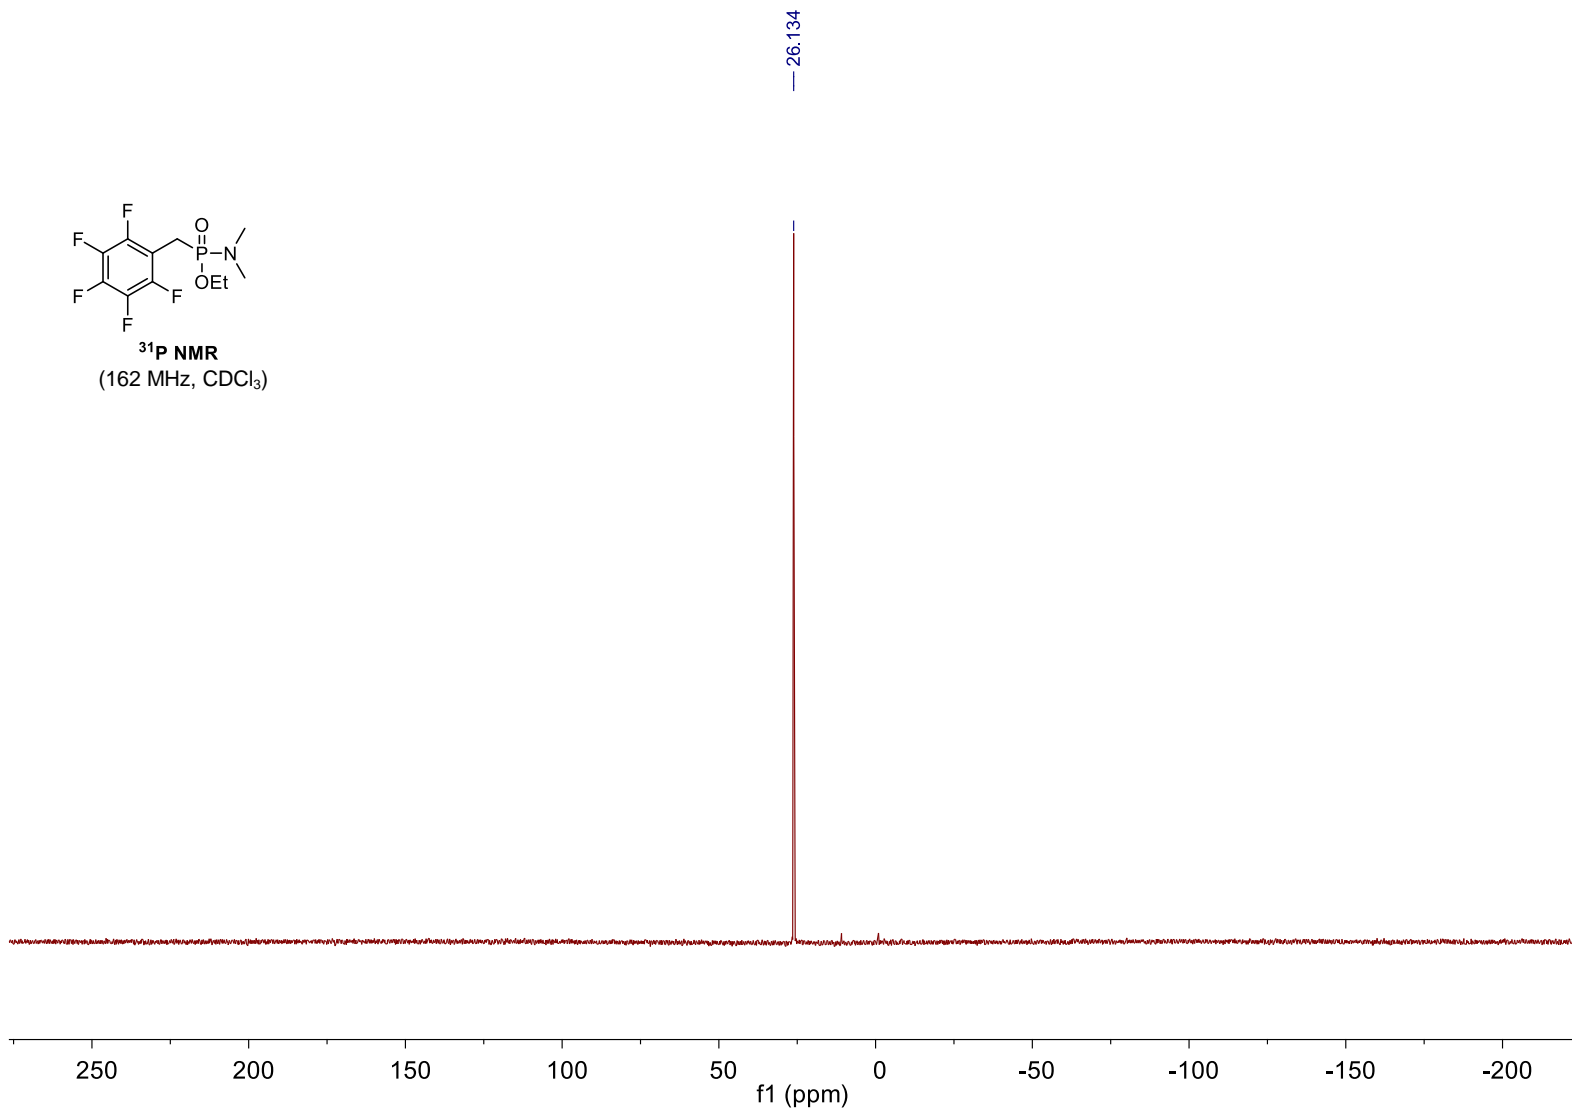

S190

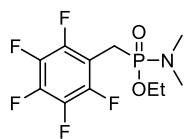

<sup>19</sup>F NMR  
(376 MHz, CDCl<sub>3</sub>)

-141.708  
-141.766  
-141.776  
-14.816  
-156.312  
-156.385  
-162.255  
-162.277  
-162.313  
-162.333  
-162.370  
-162.390

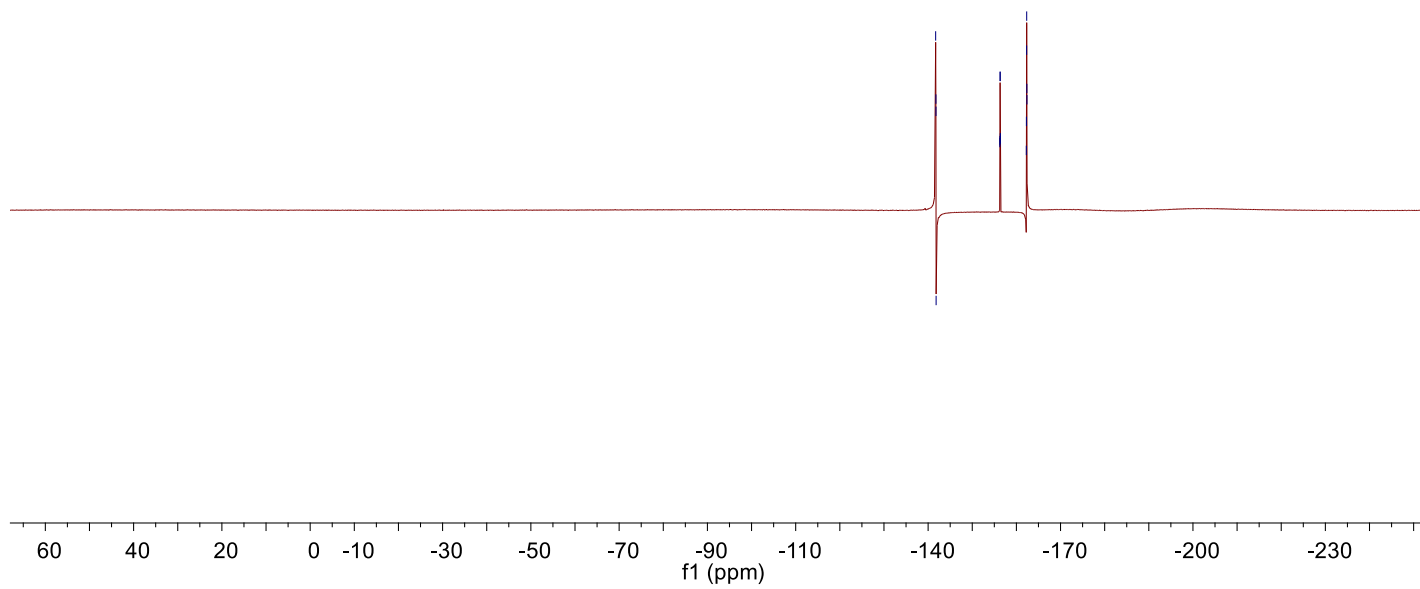

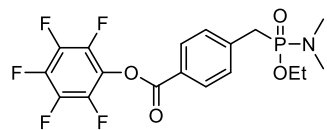

<sup>1</sup>H NMR  
(400 MHz, CDCl<sub>3</sub>)

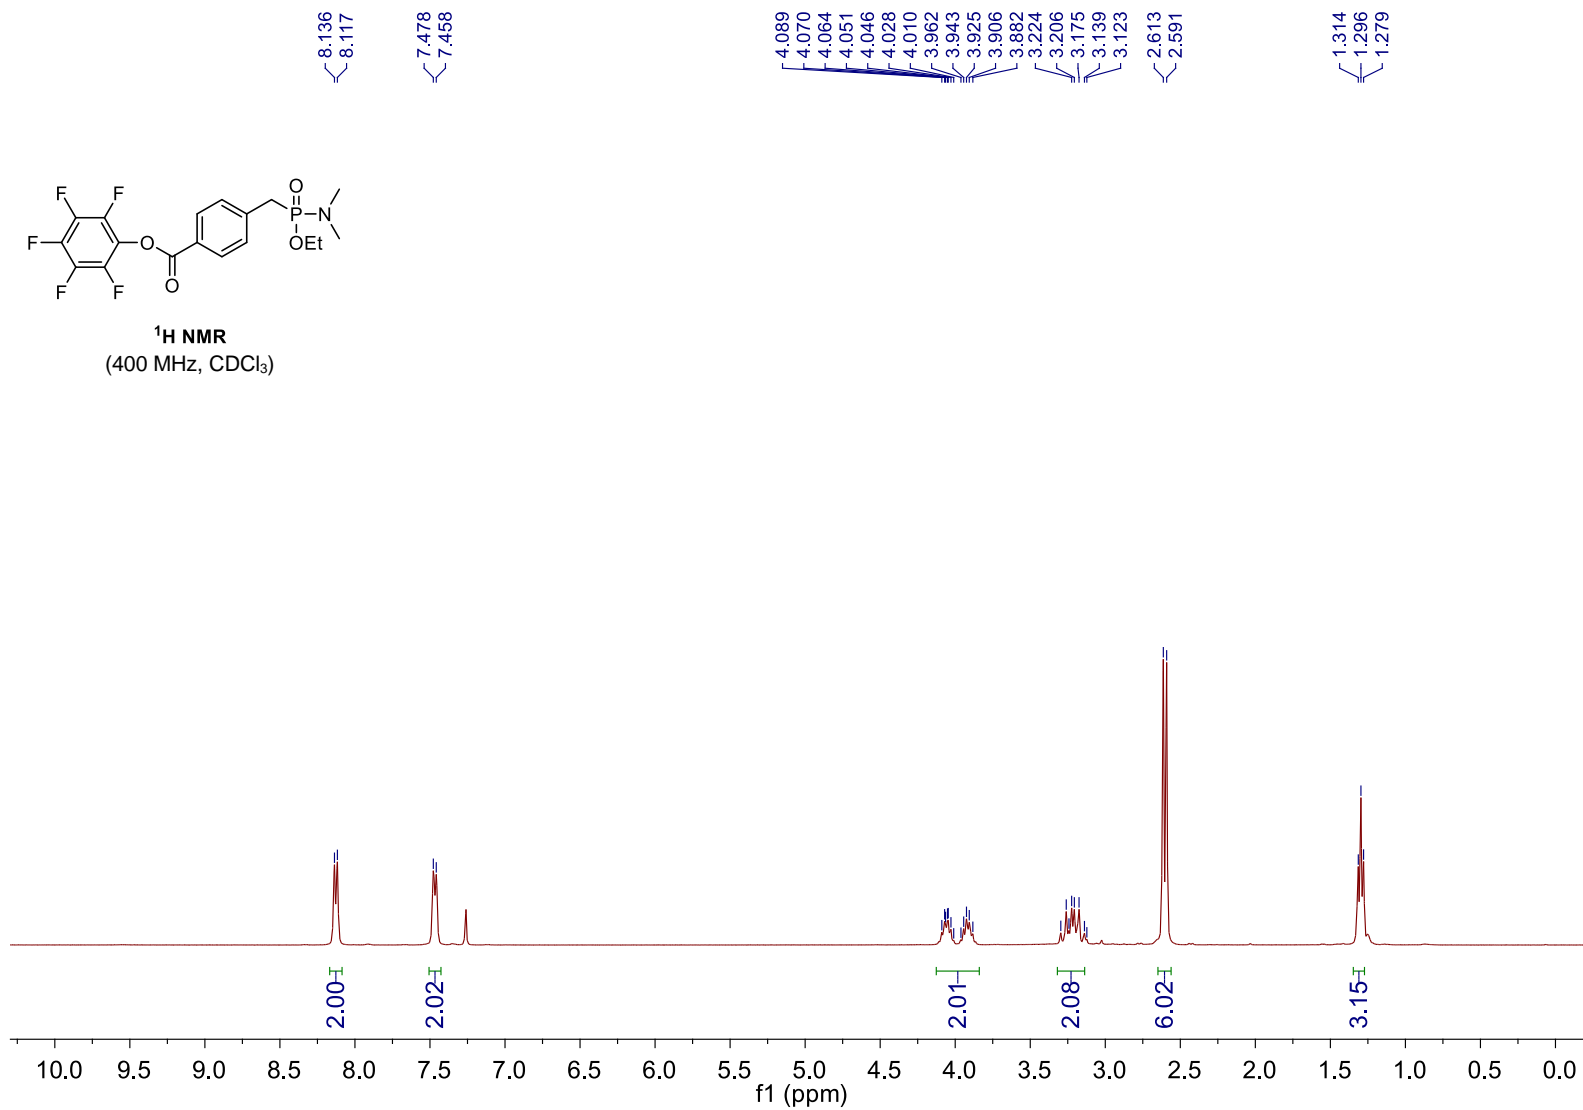



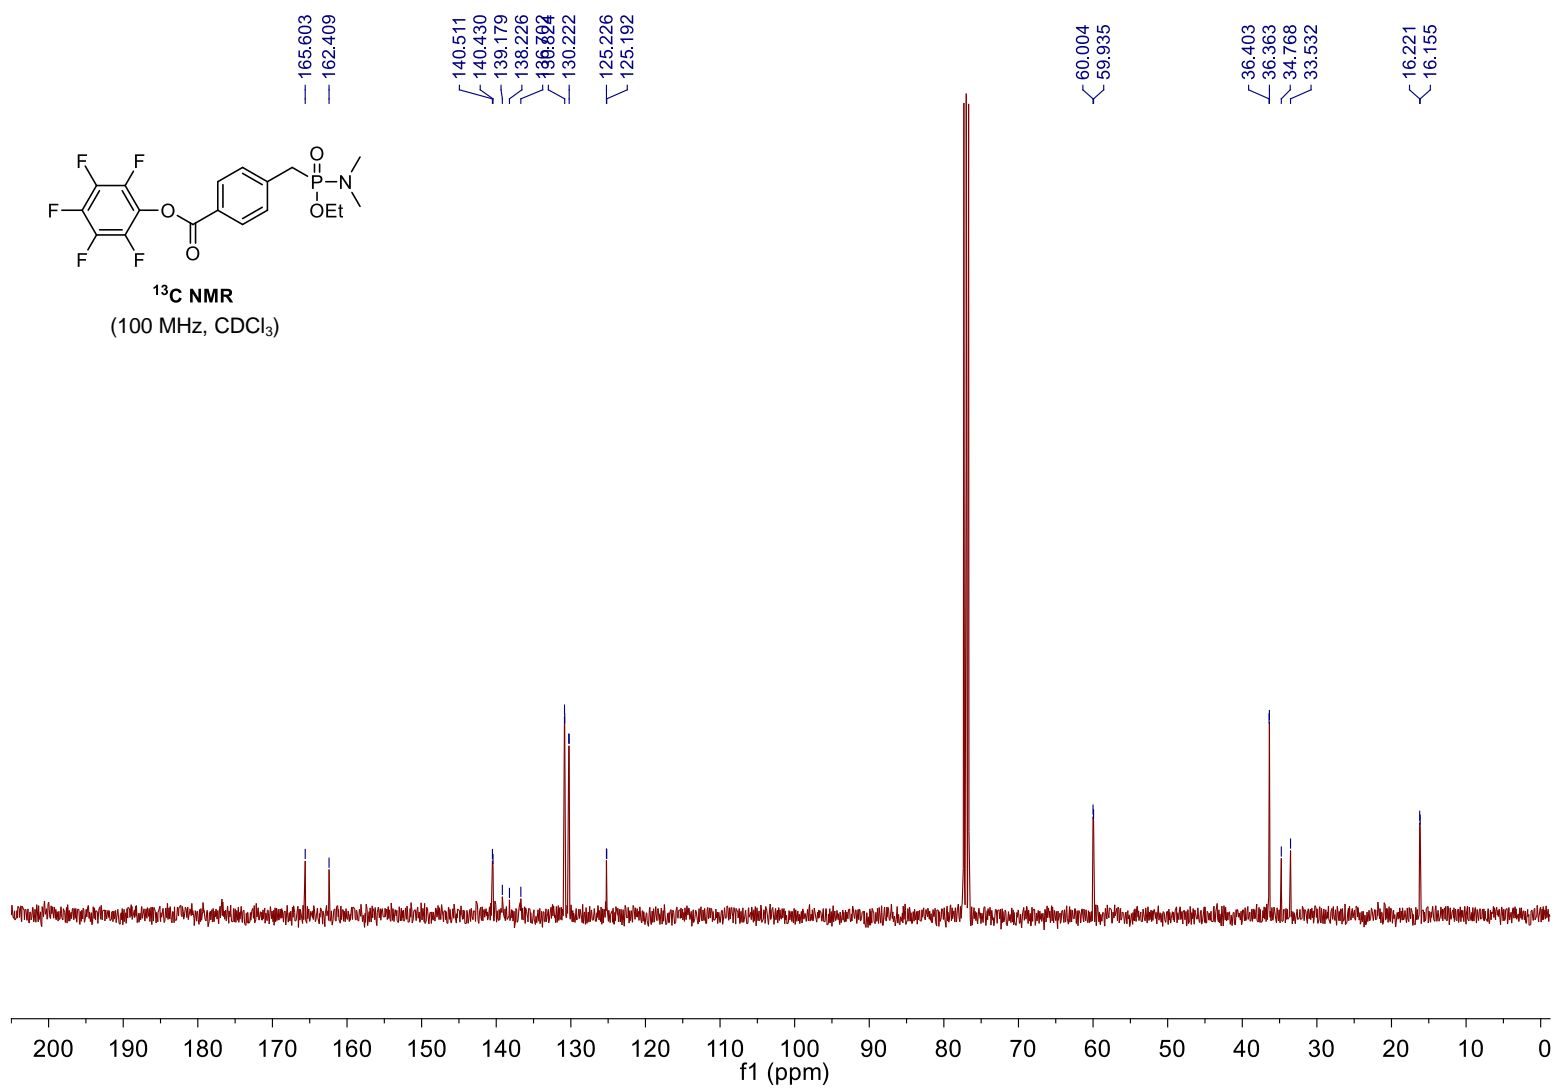

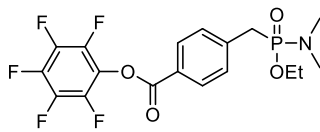

<sup>31</sup>P NMR  
(162 MHz, CDCl<sub>3</sub>)

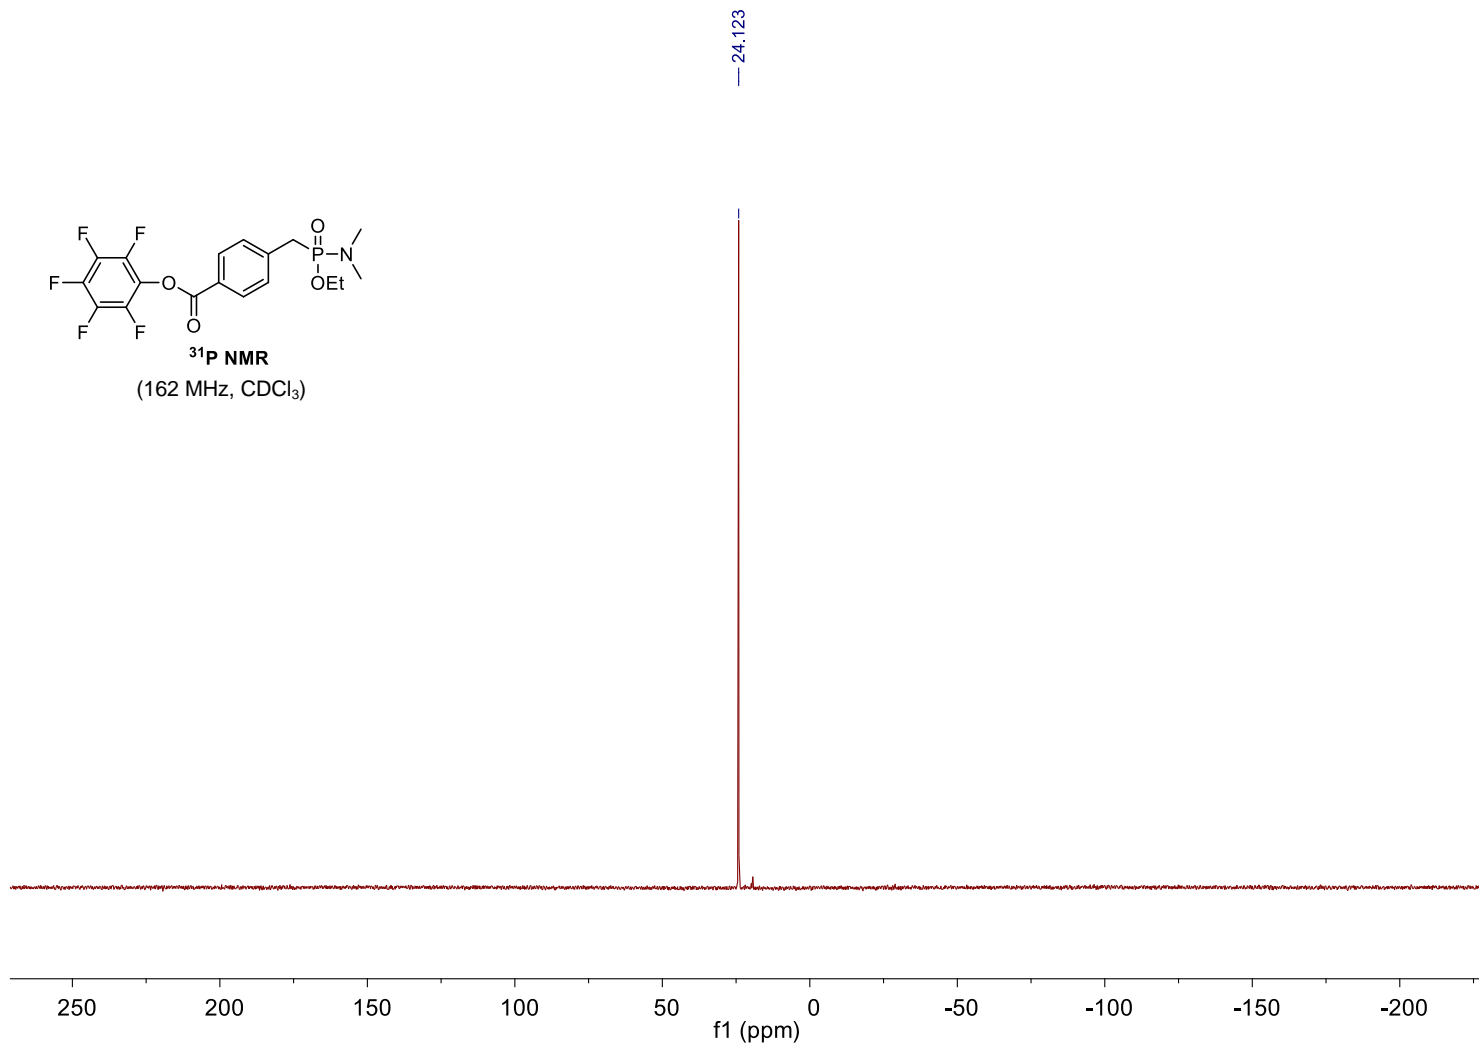

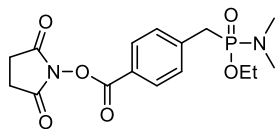

**<sup>1</sup>H NMR**  
(400 MHz, CDCl<sub>3</sub>)

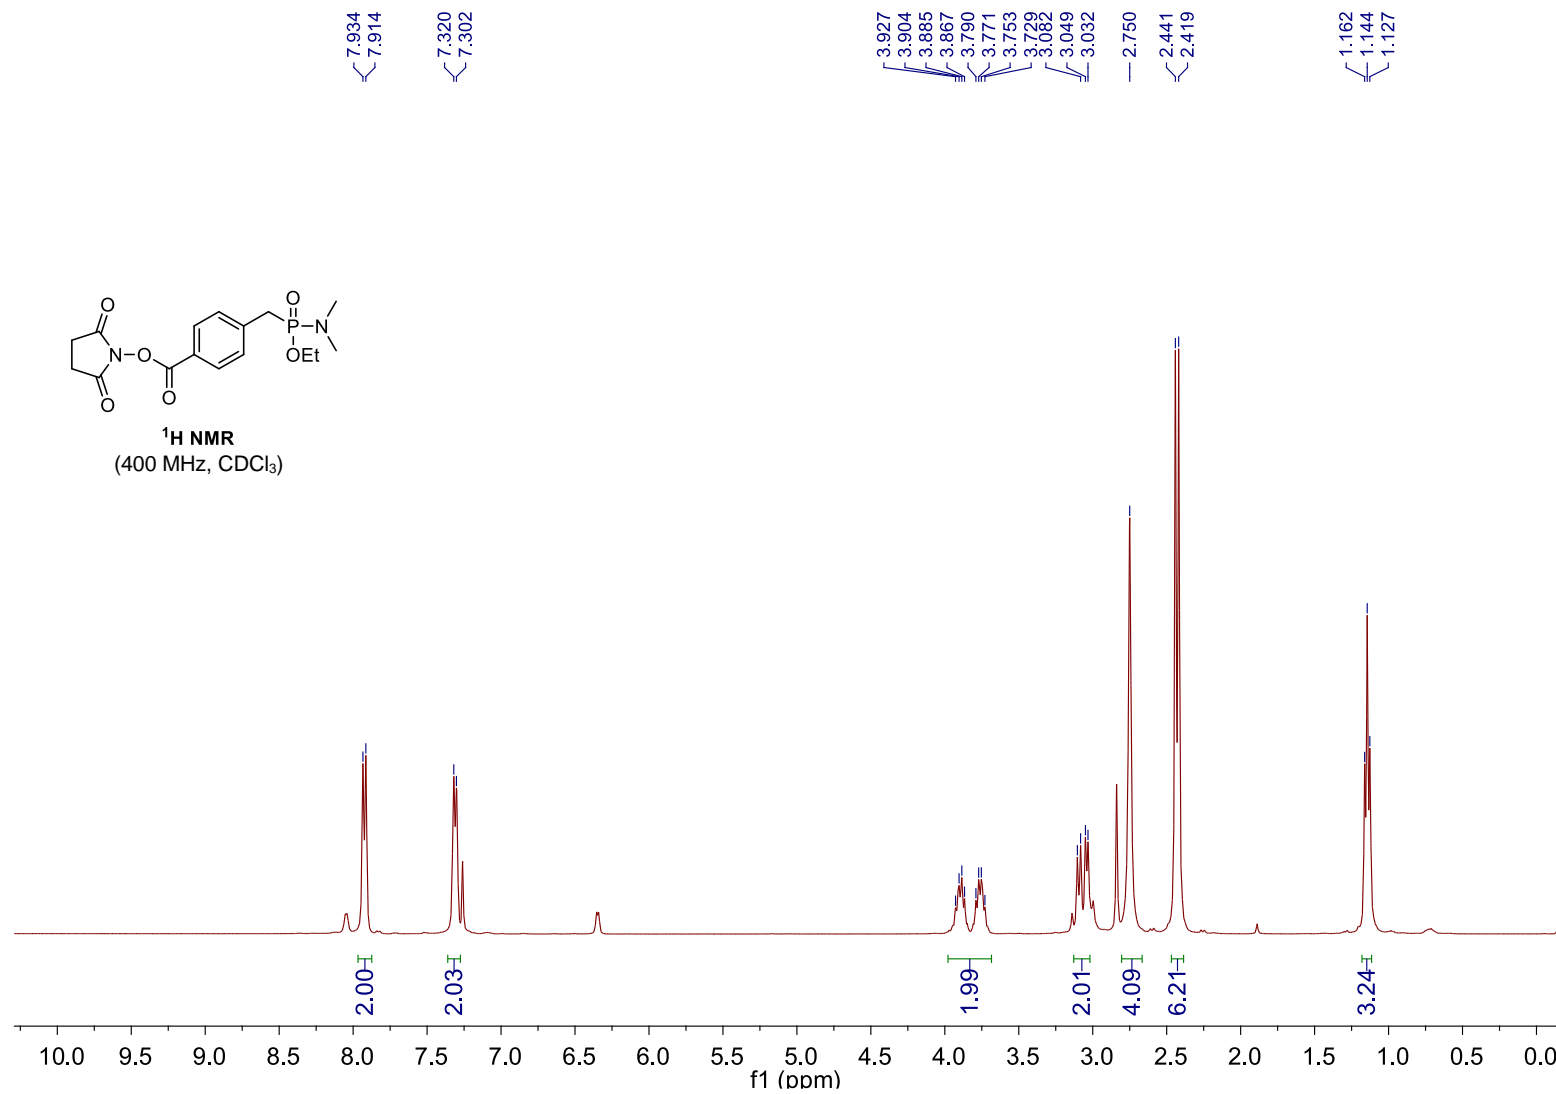

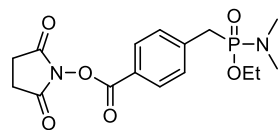

**<sup>13</sup>C NMR**  
(100 MHz, CDCl<sub>3</sub>)

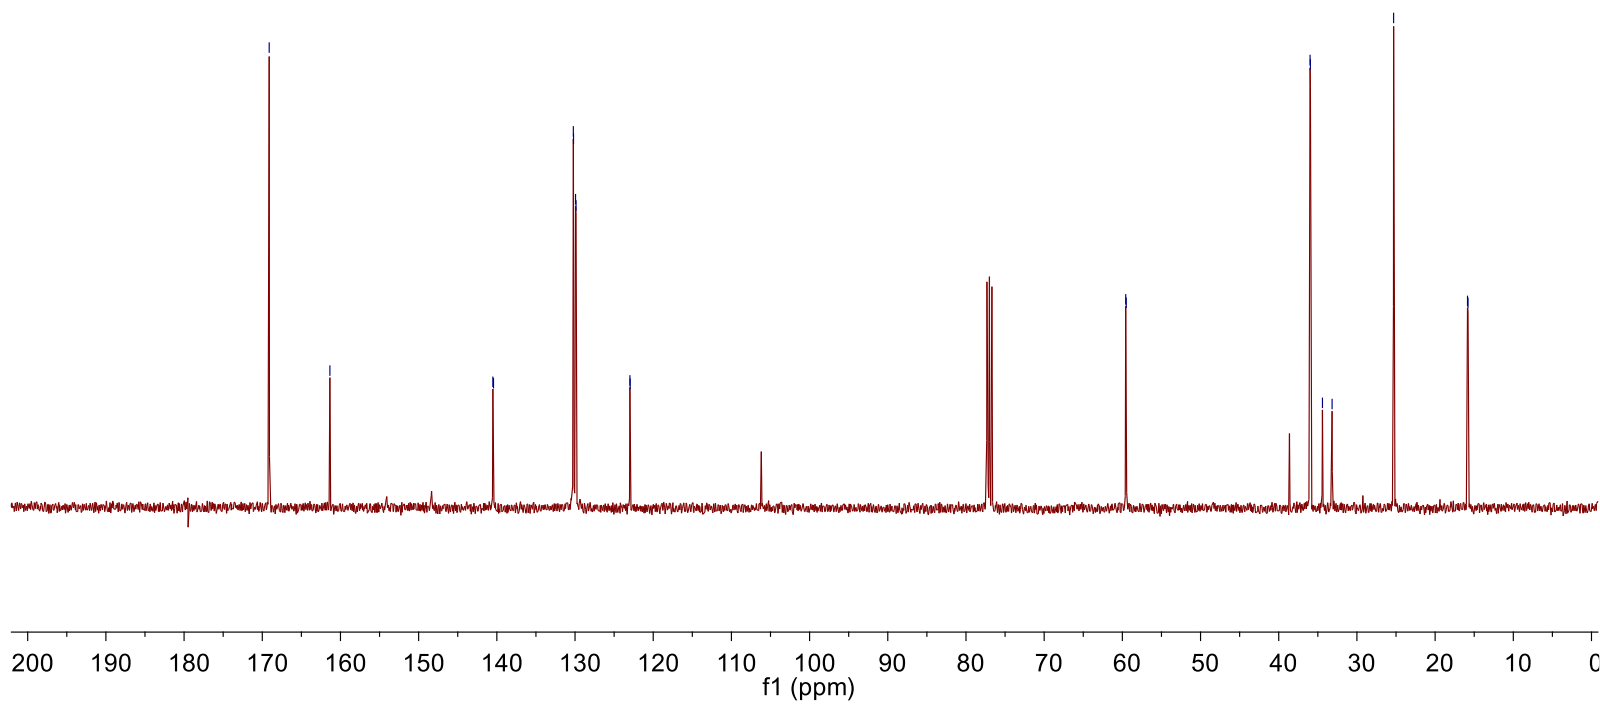

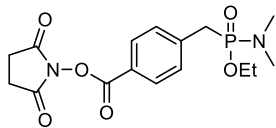

**<sup>31</sup>P NMR**  
(162 MHz, CDCl<sub>3</sub>)

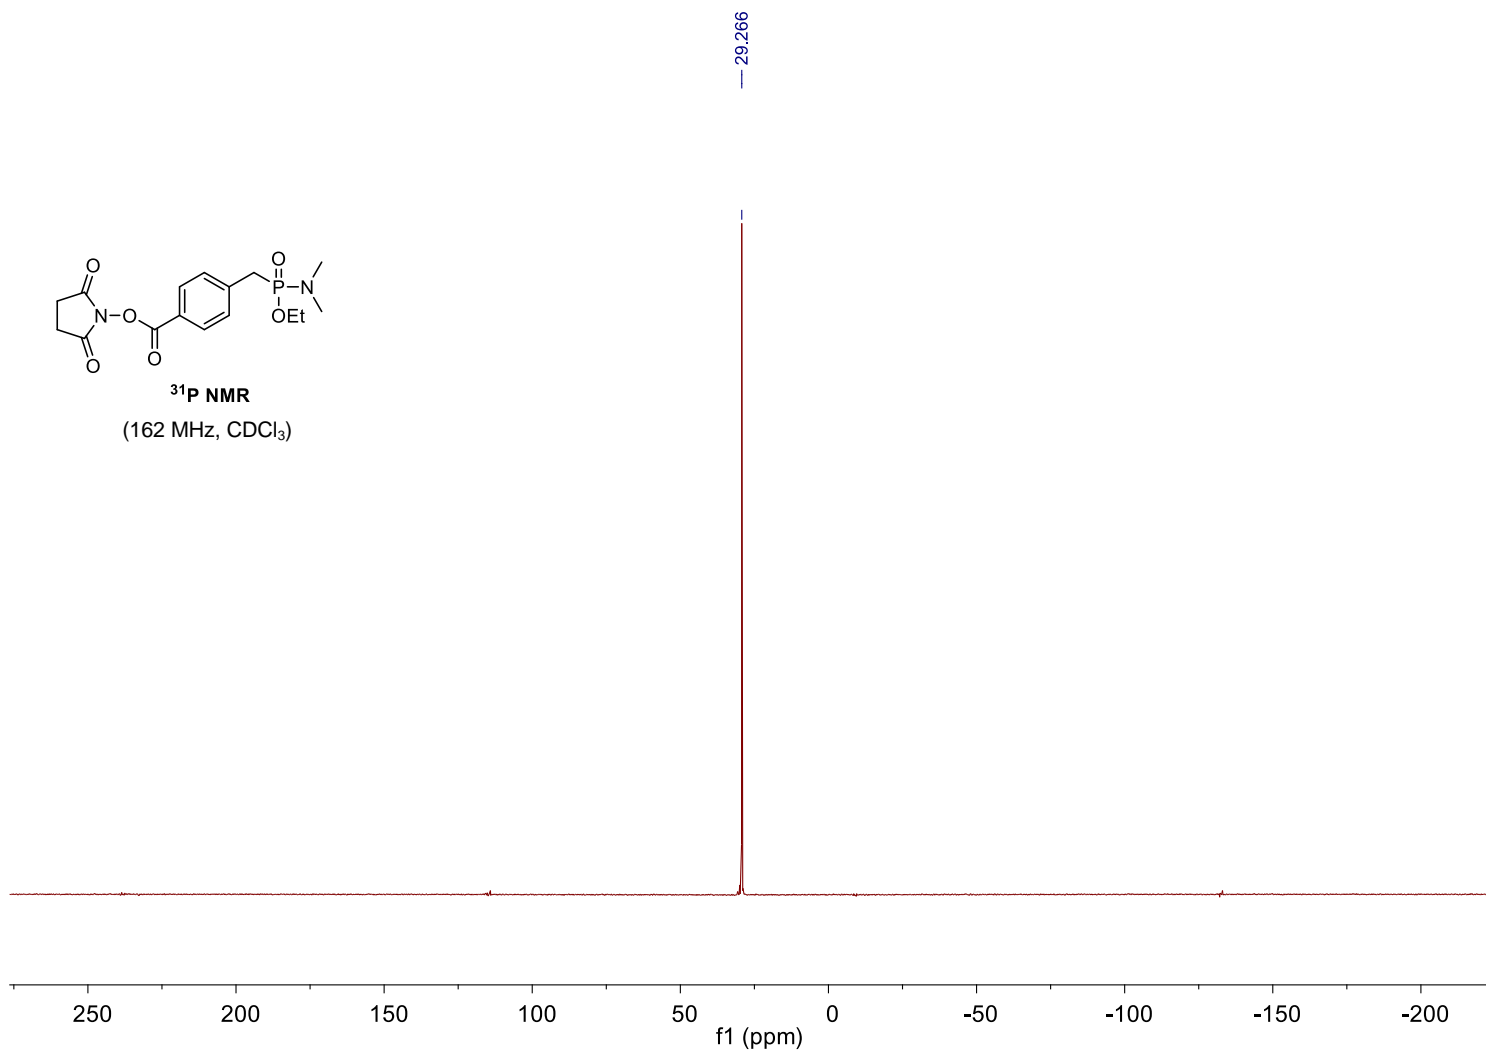

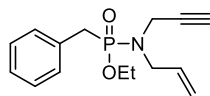

**<sup>1</sup>H NMR**  
(400 MHz, CDCl<sub>3</sub>)

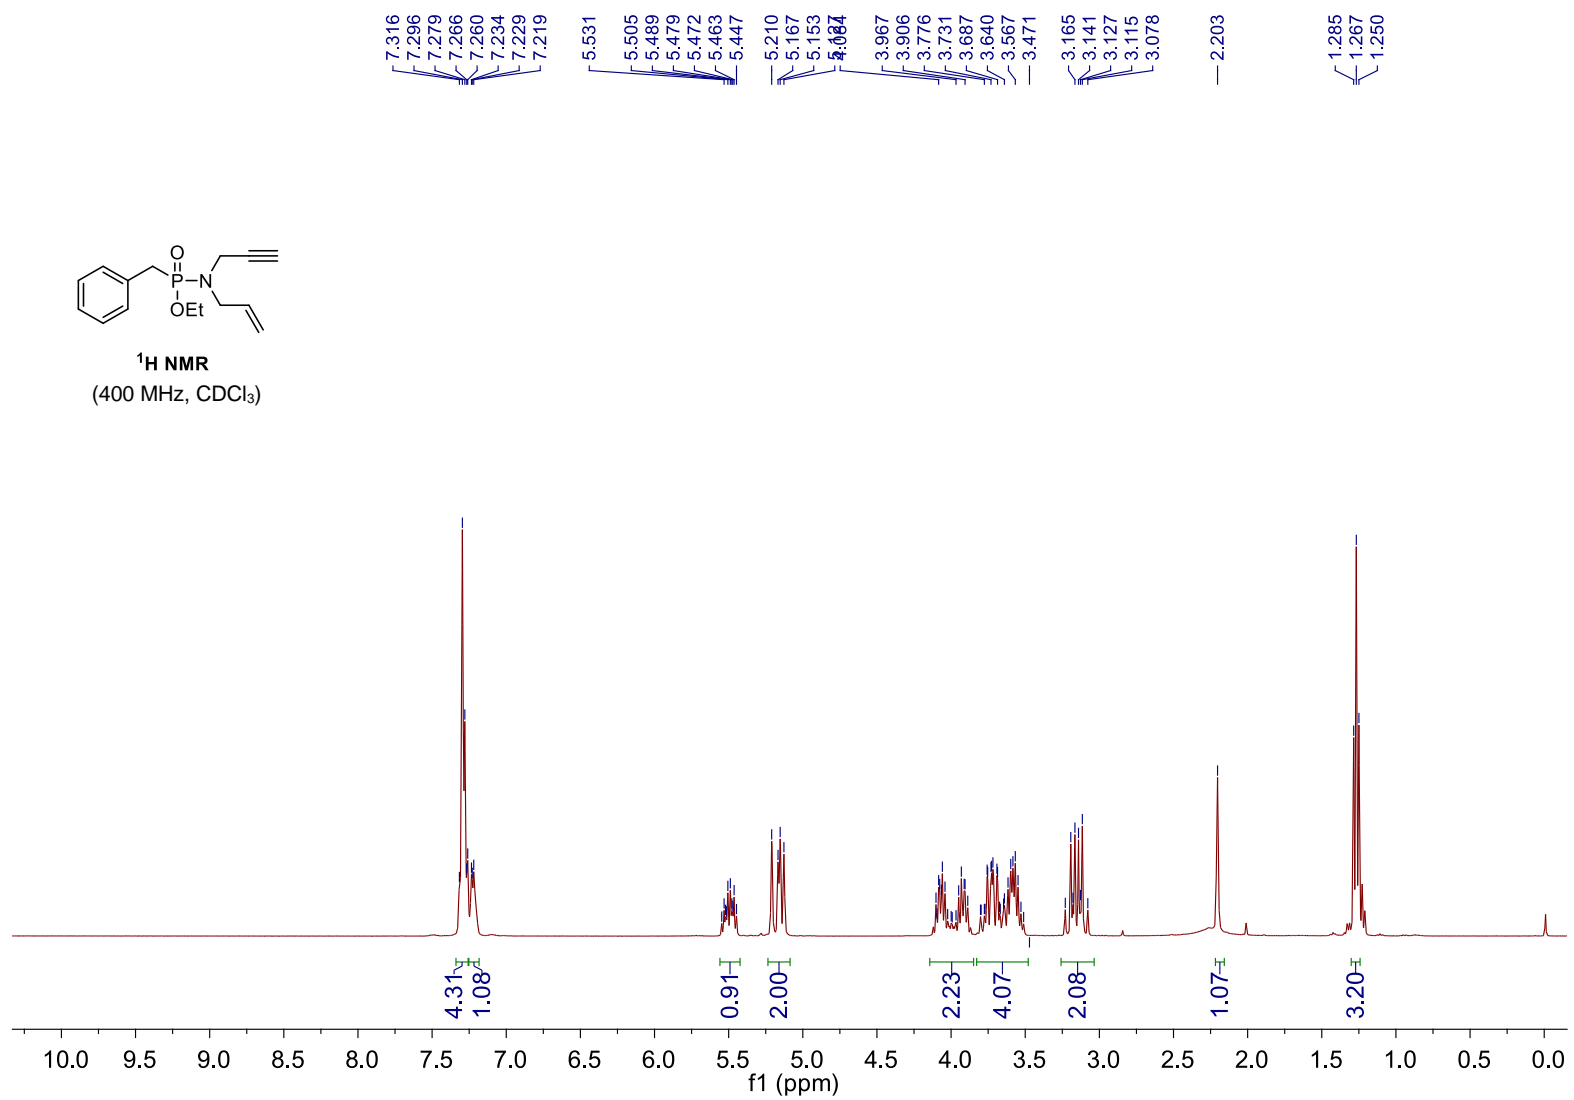

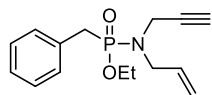

<sup>13</sup>C NMR  
(100 MHz, CDCl<sub>3</sub>)

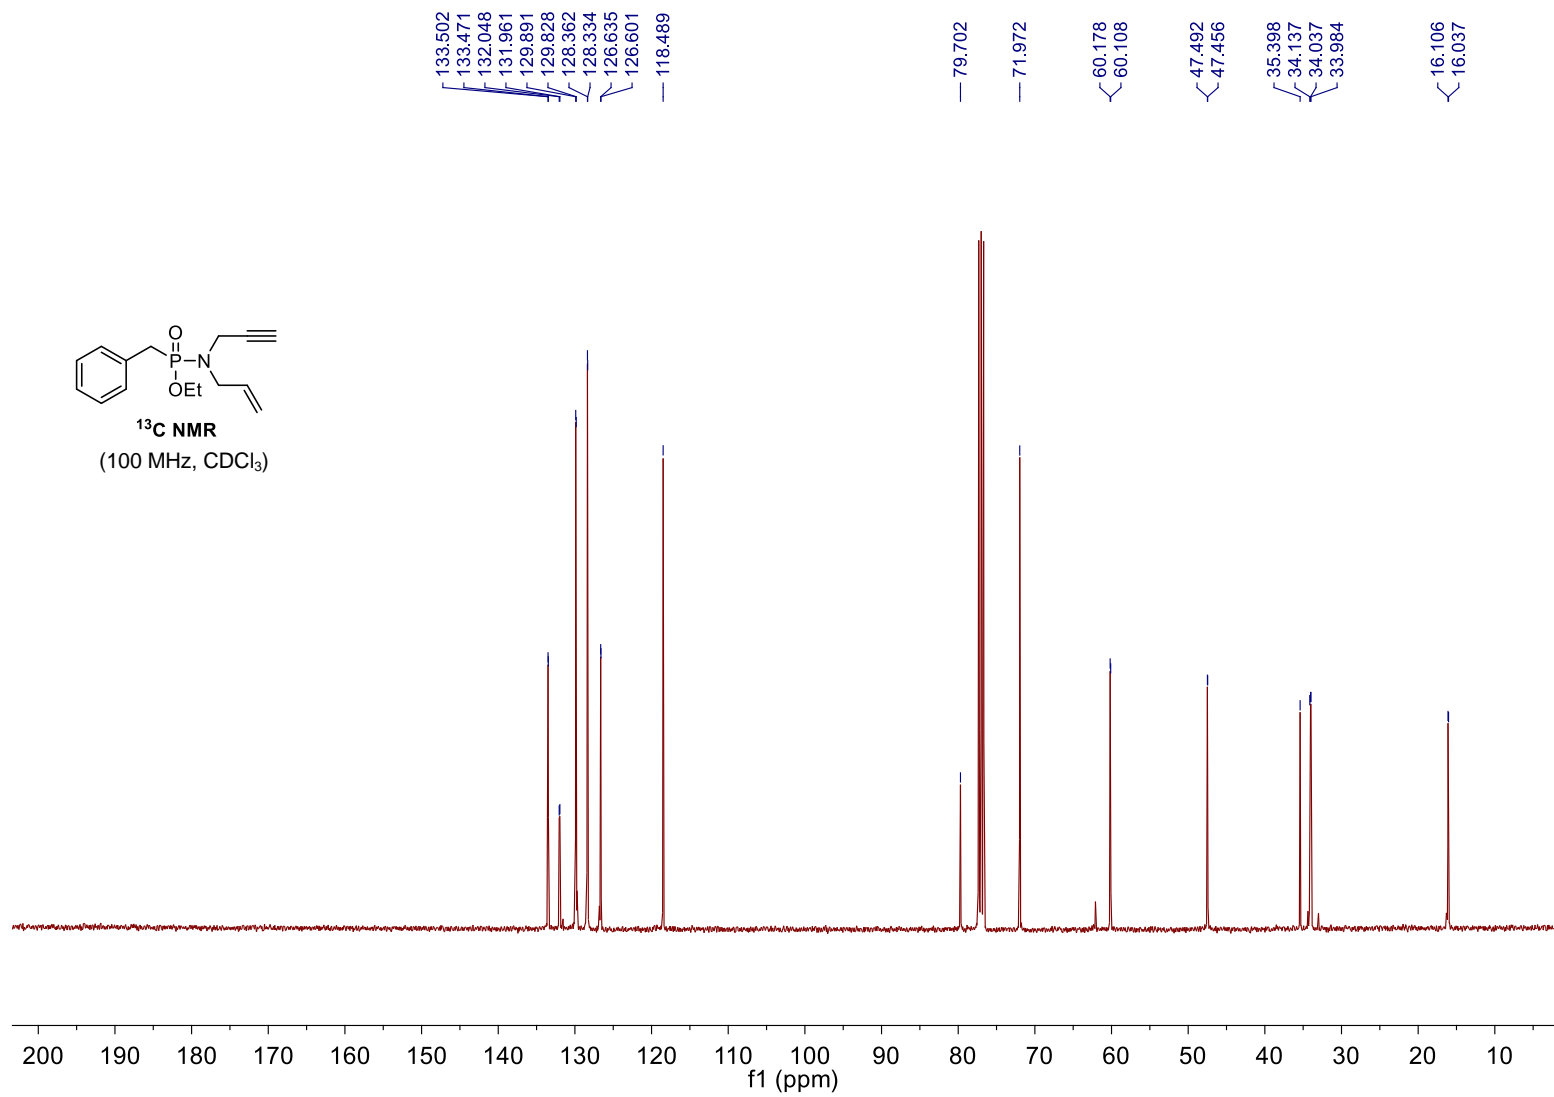

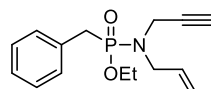

**<sup>31</sup>P NMR**  
(162 MHz, CDCl<sub>3</sub>)

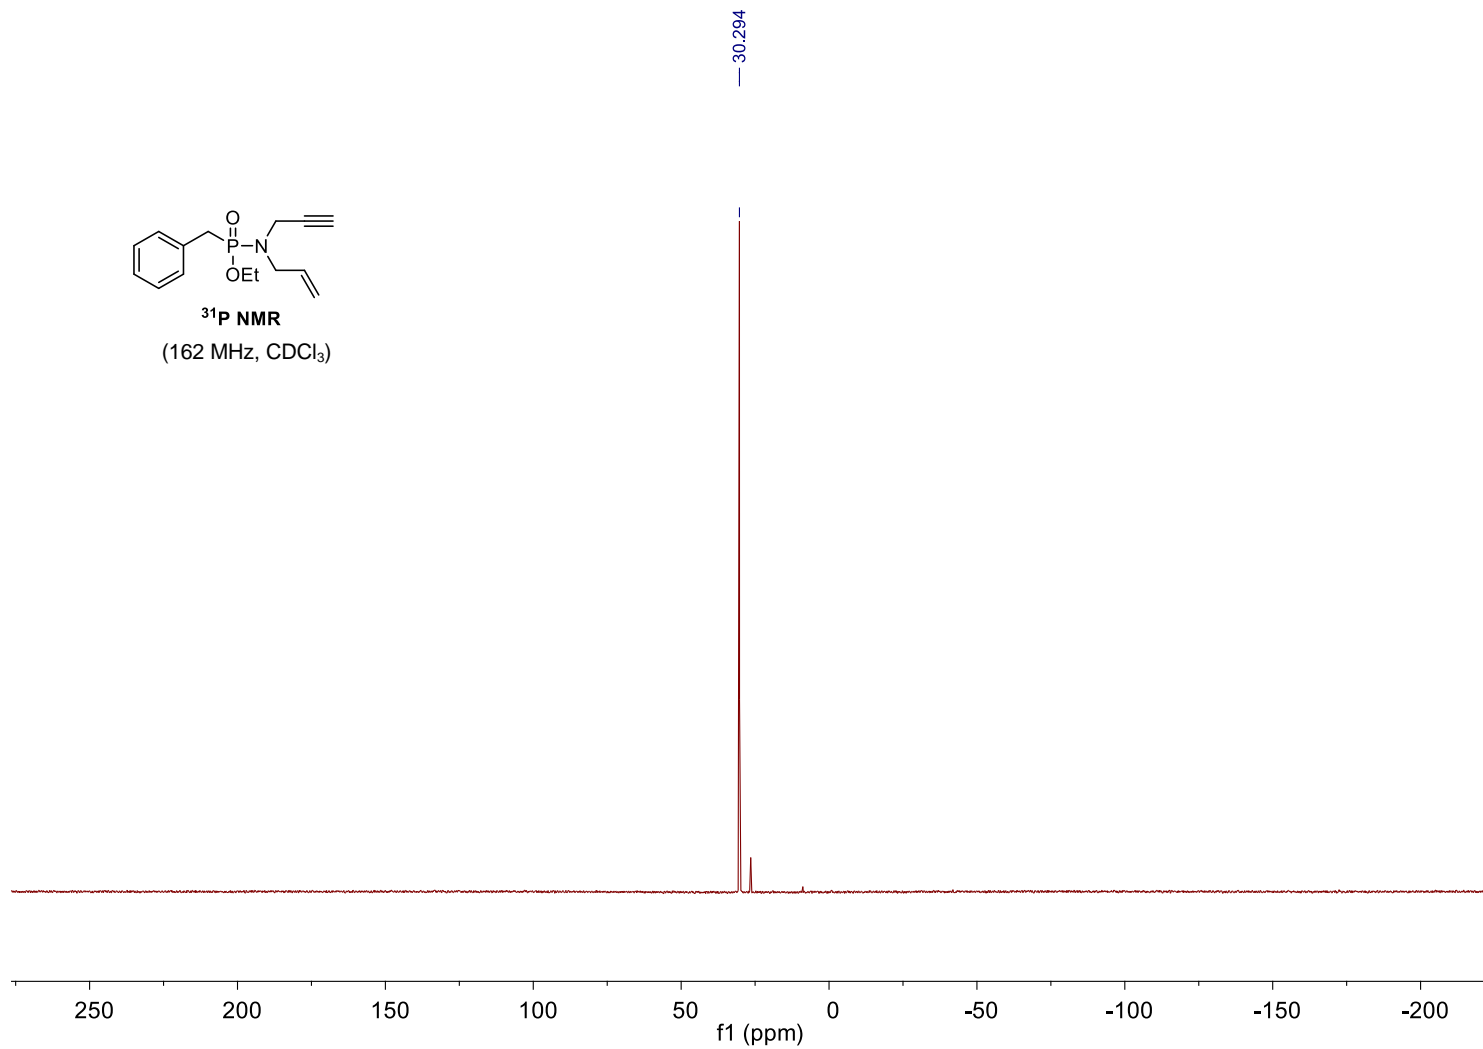

S200



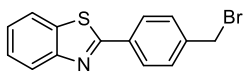

**<sup>1</sup>H NMR**  
(400 MHz, CDCl<sub>3</sub>)

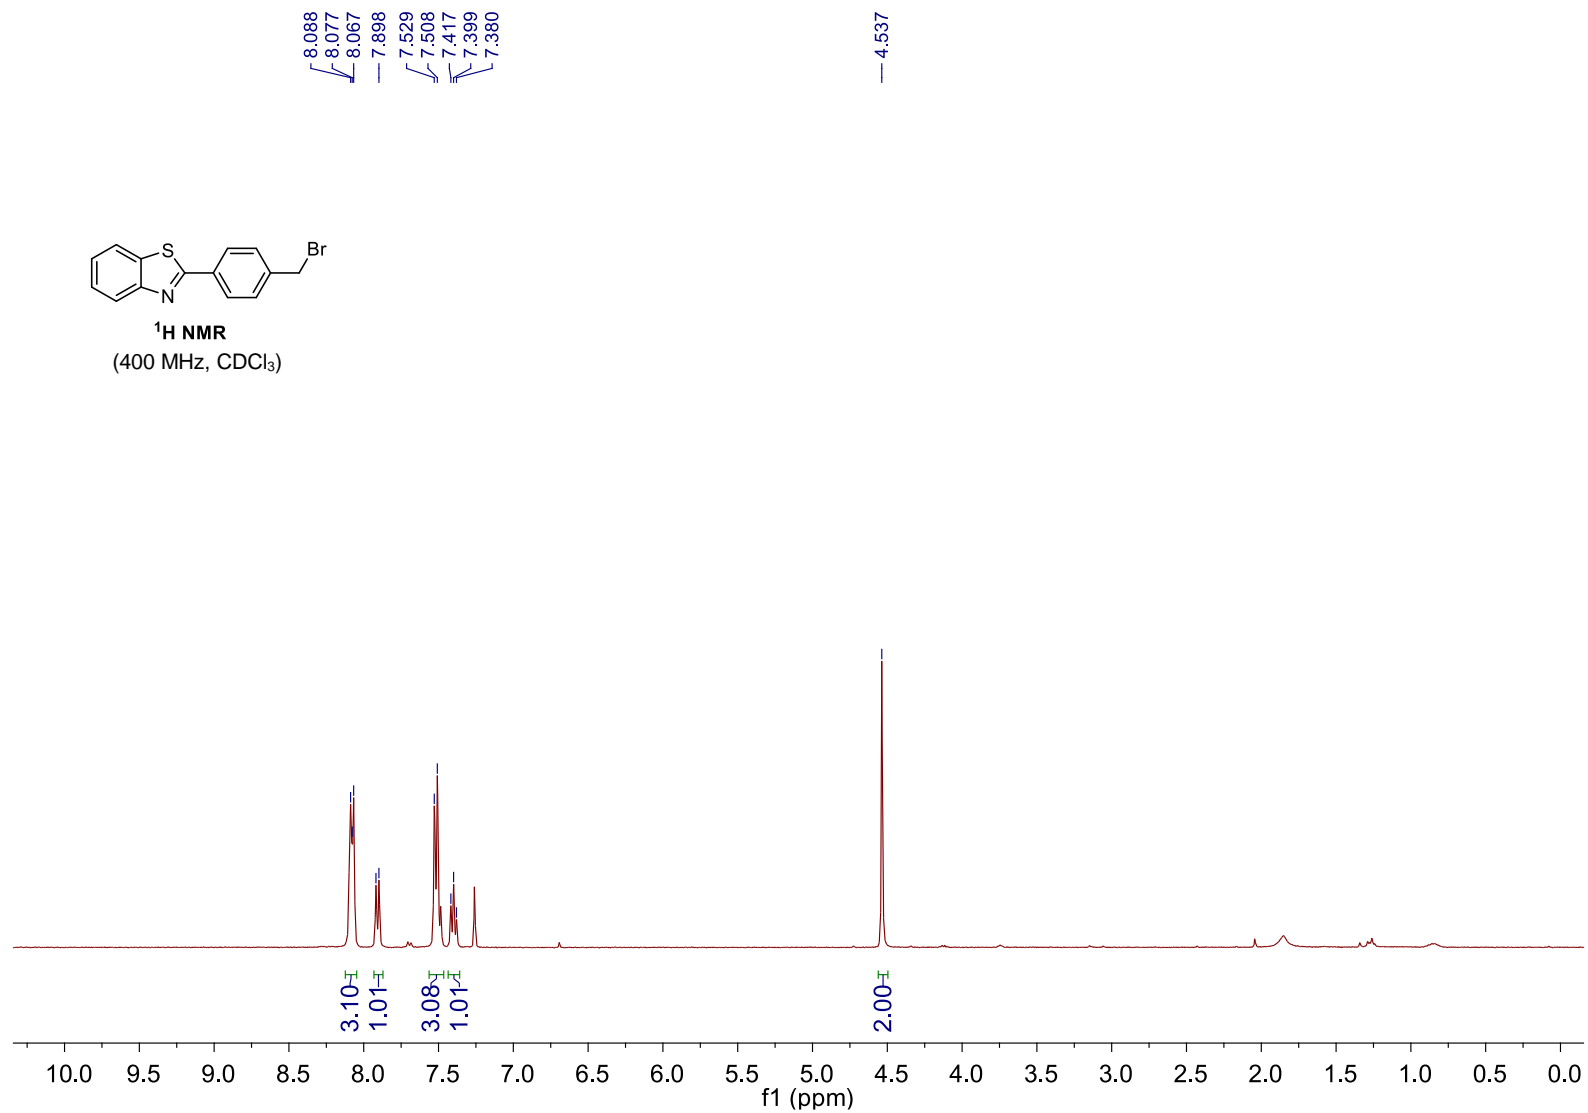

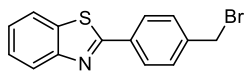

<sup>13</sup>C NMR  
(100 MHz, CDCl<sub>3</sub>)

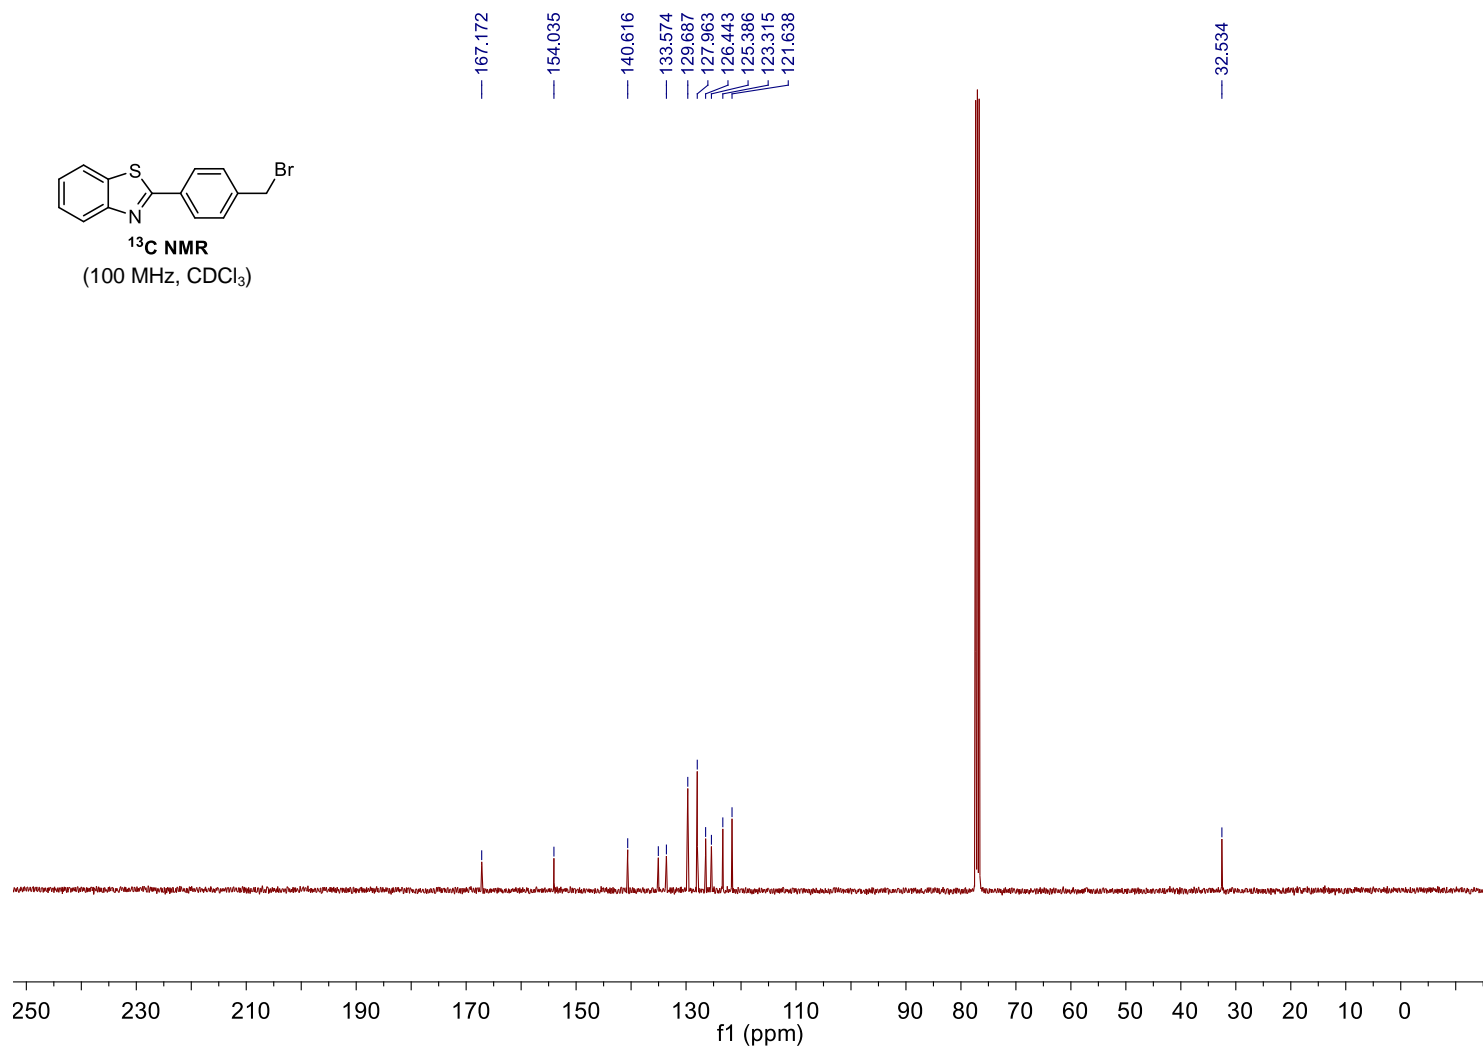

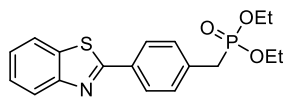

<sup>1</sup>H NMR  
(400 MHz, CDCl<sub>3</sub>)

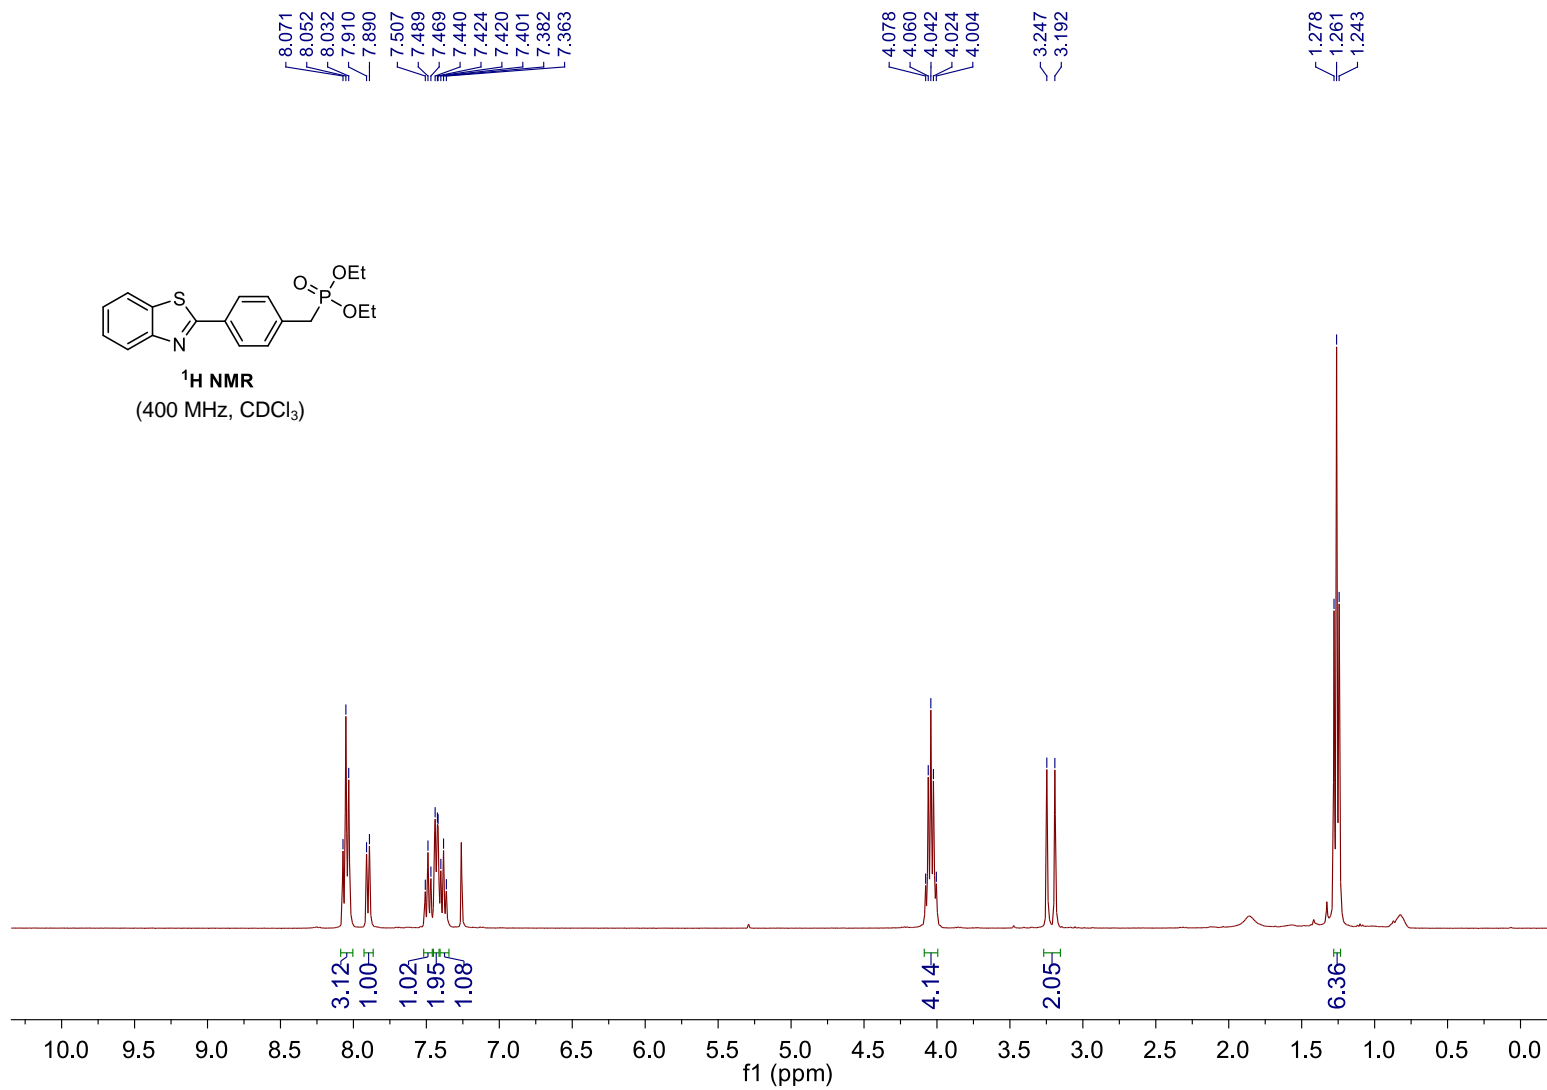

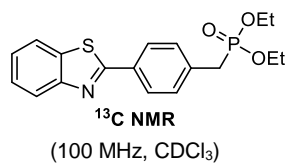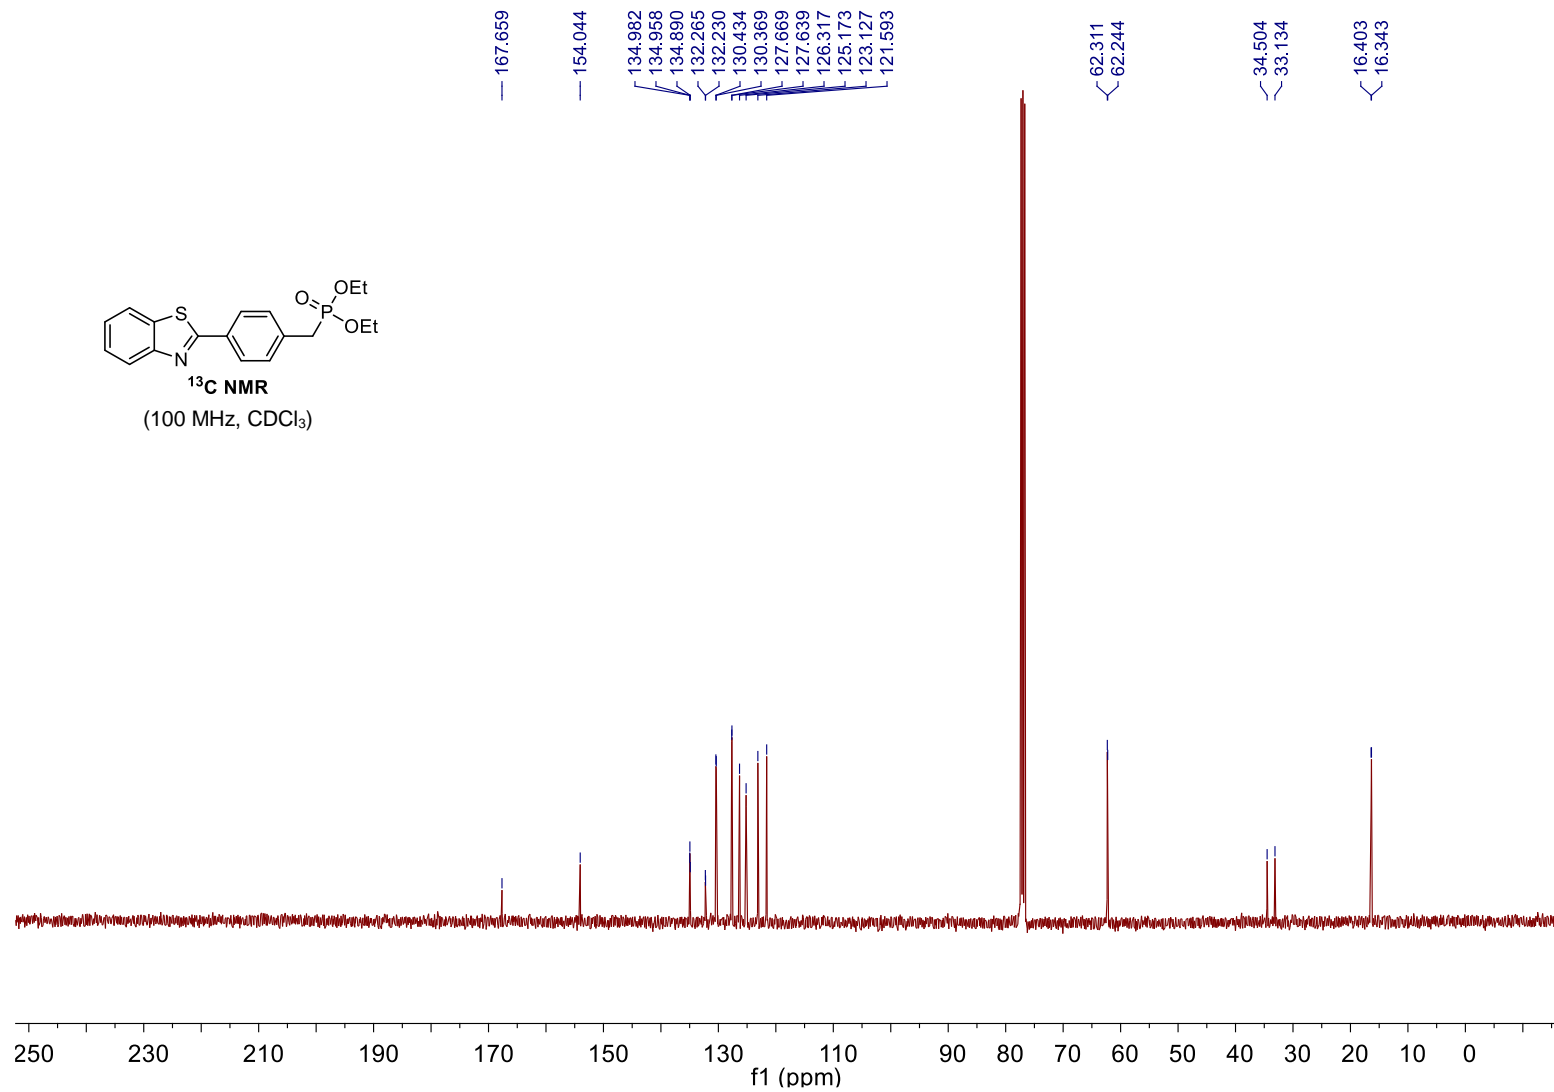

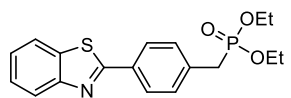

**<sup>31</sup>P NMR**  
(162 MHz, CDCl<sub>3</sub>)

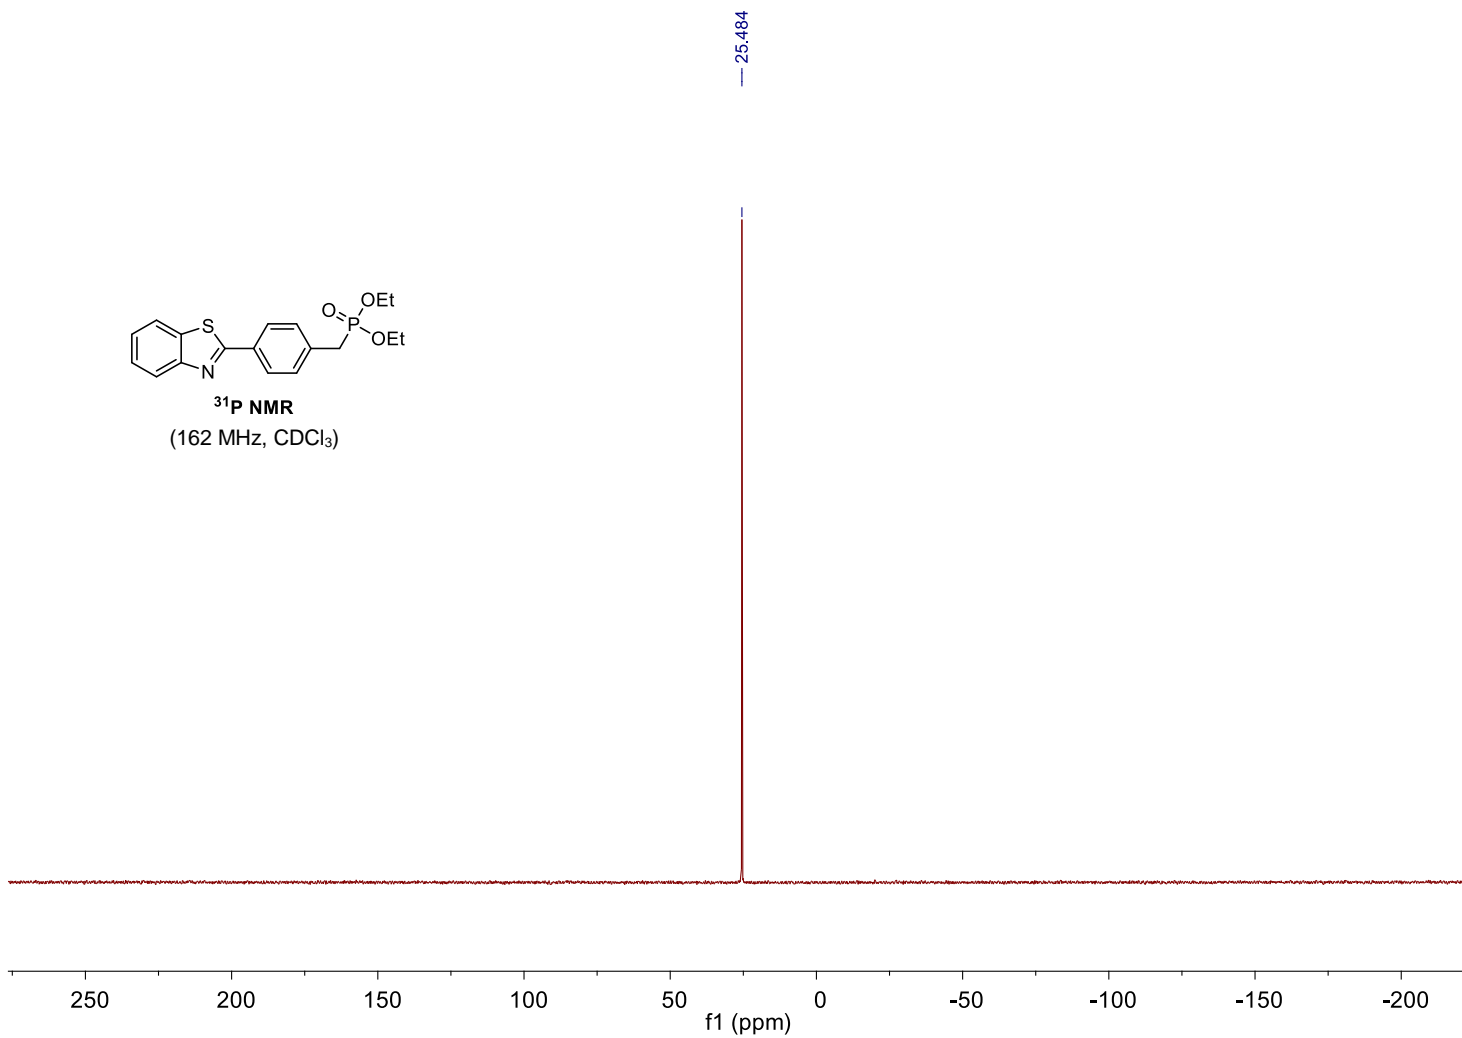

S205

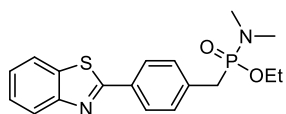

<sup>1</sup>H NMR  
(400 MHz, CDCl<sub>3</sub>)

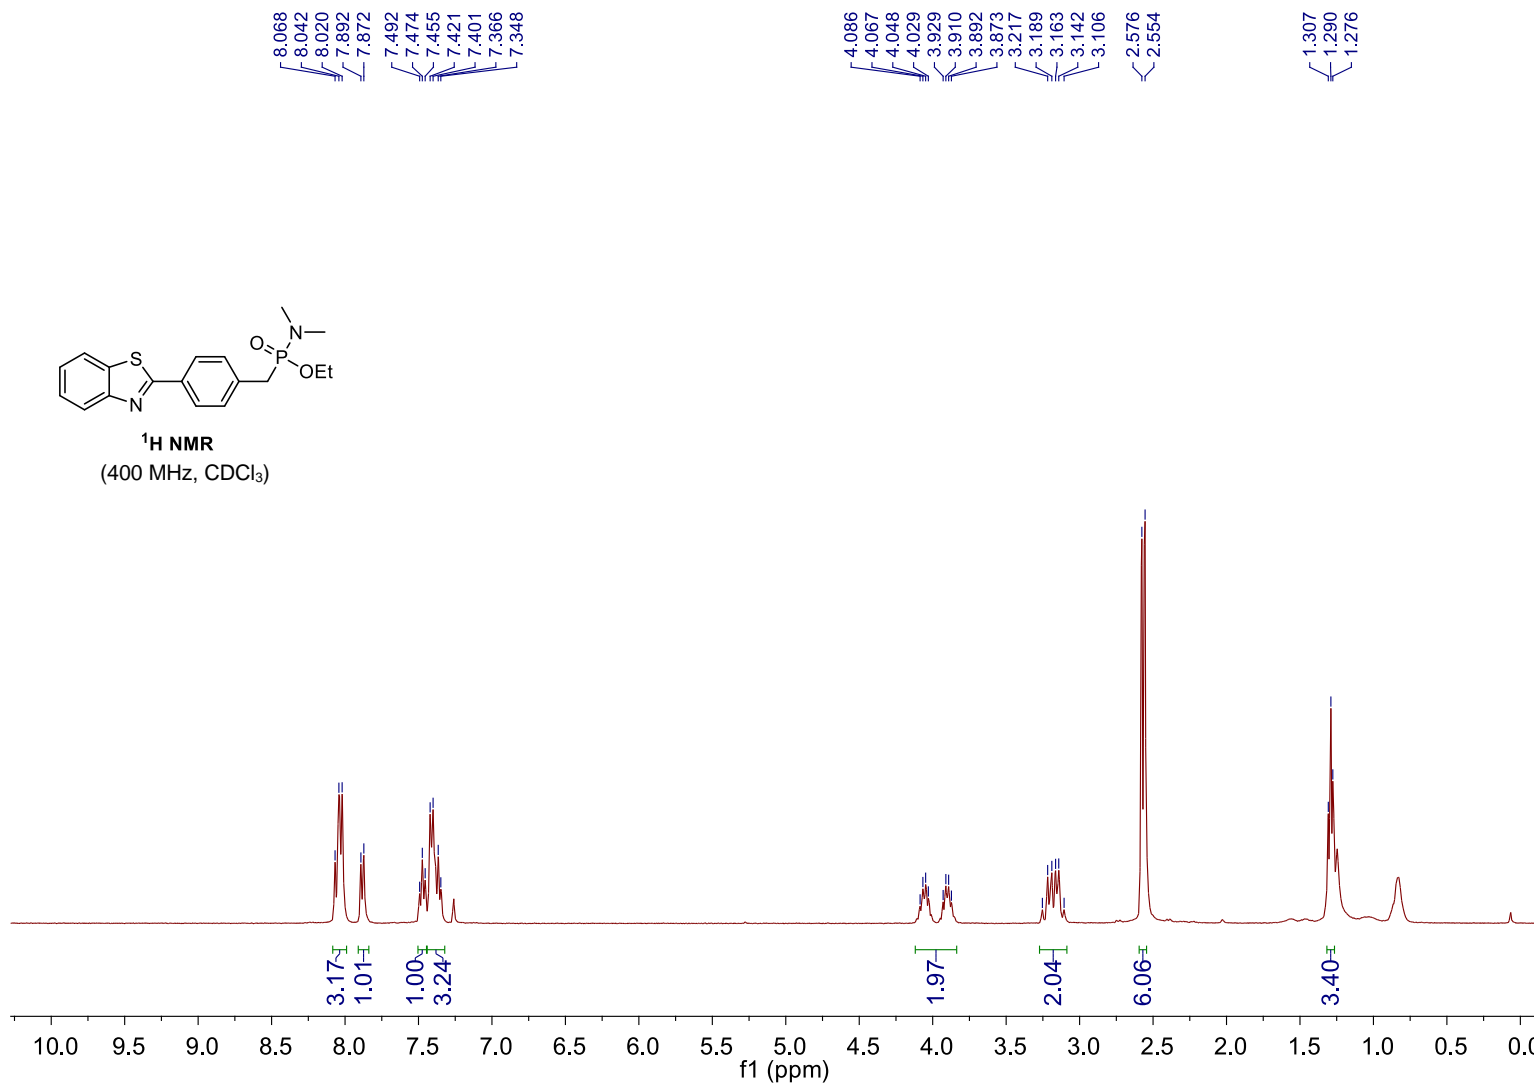

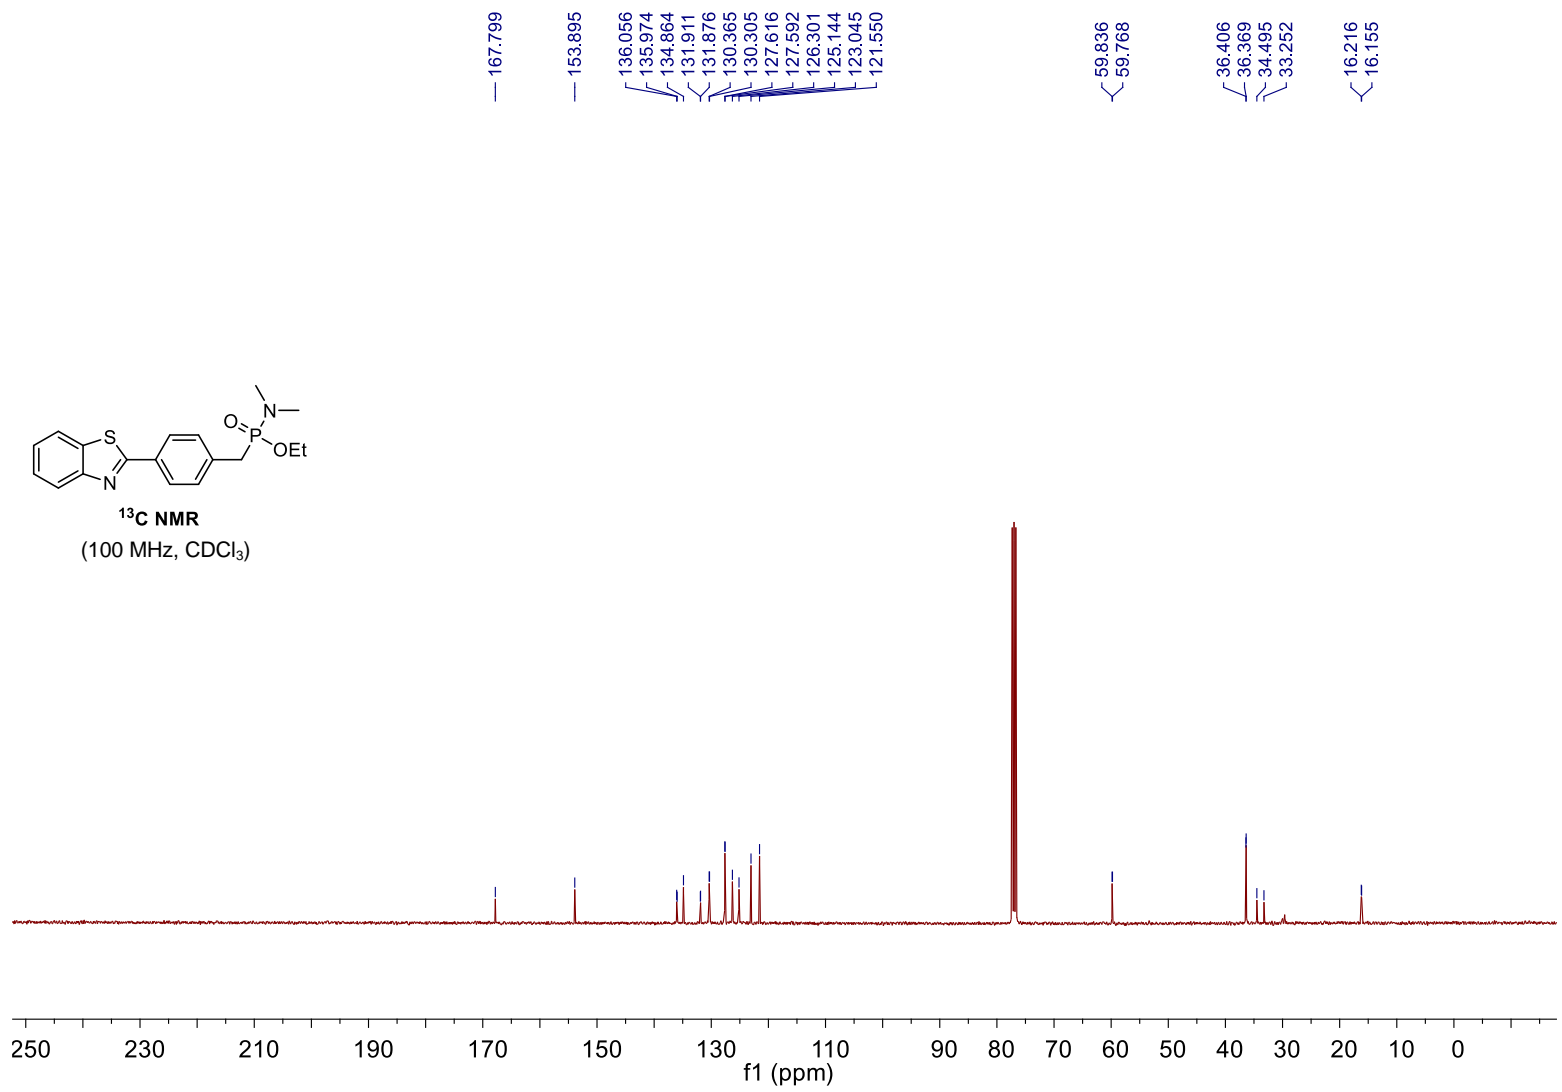

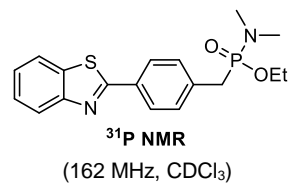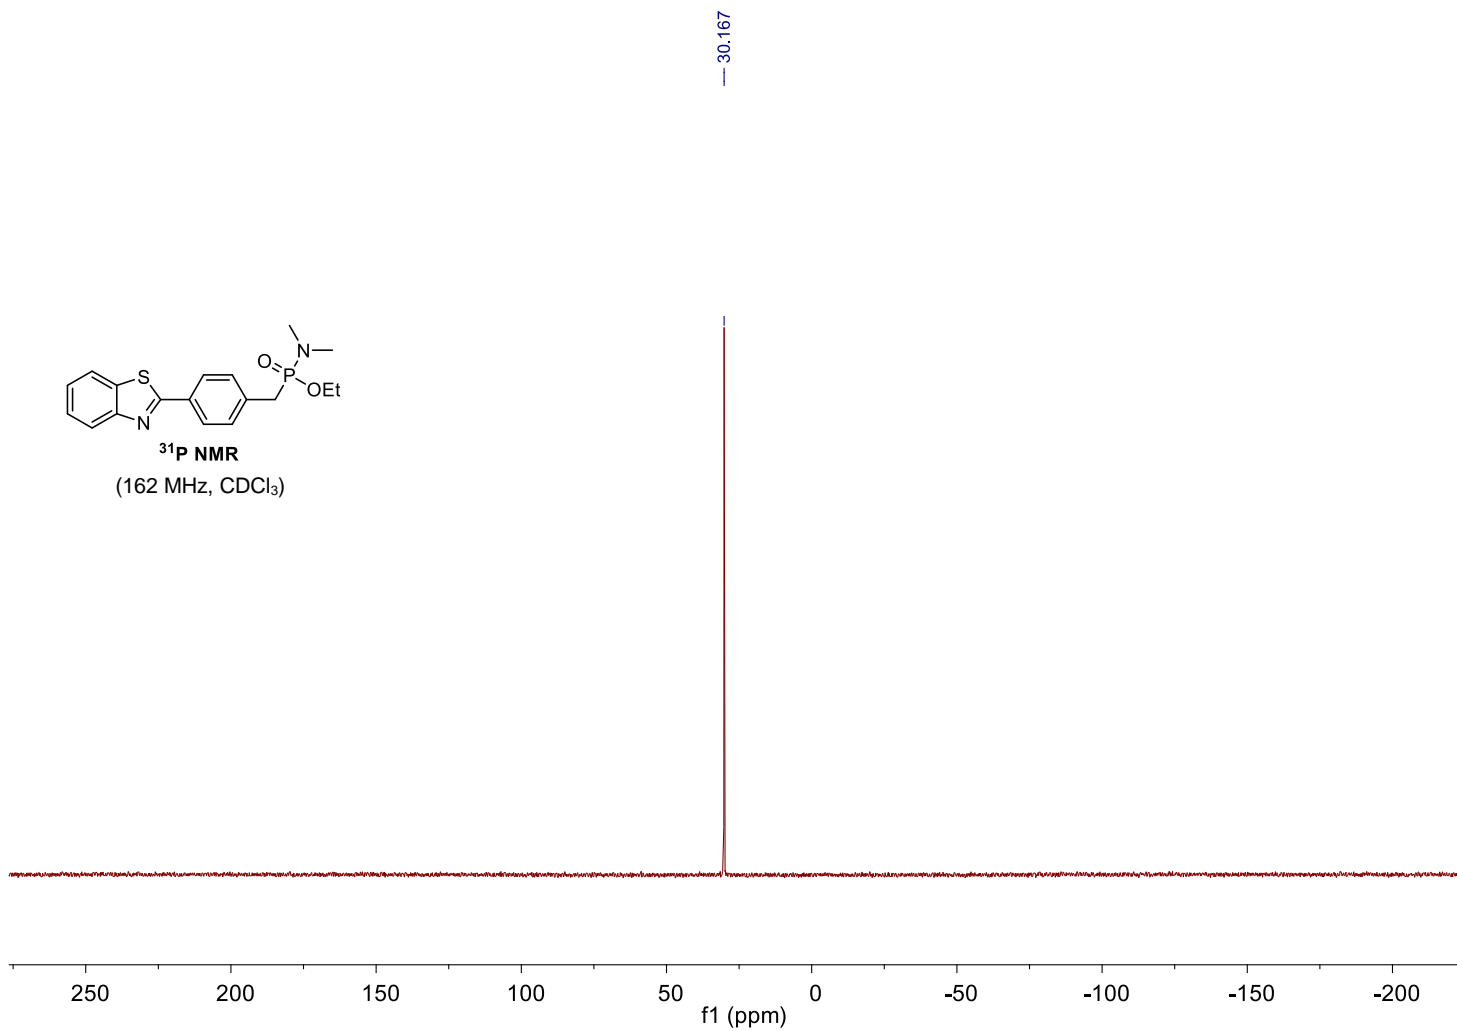



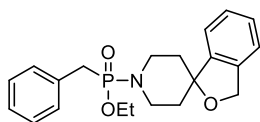

**<sup>1</sup>H NMR**  
(400 MHz, CDCl<sub>3</sub>)

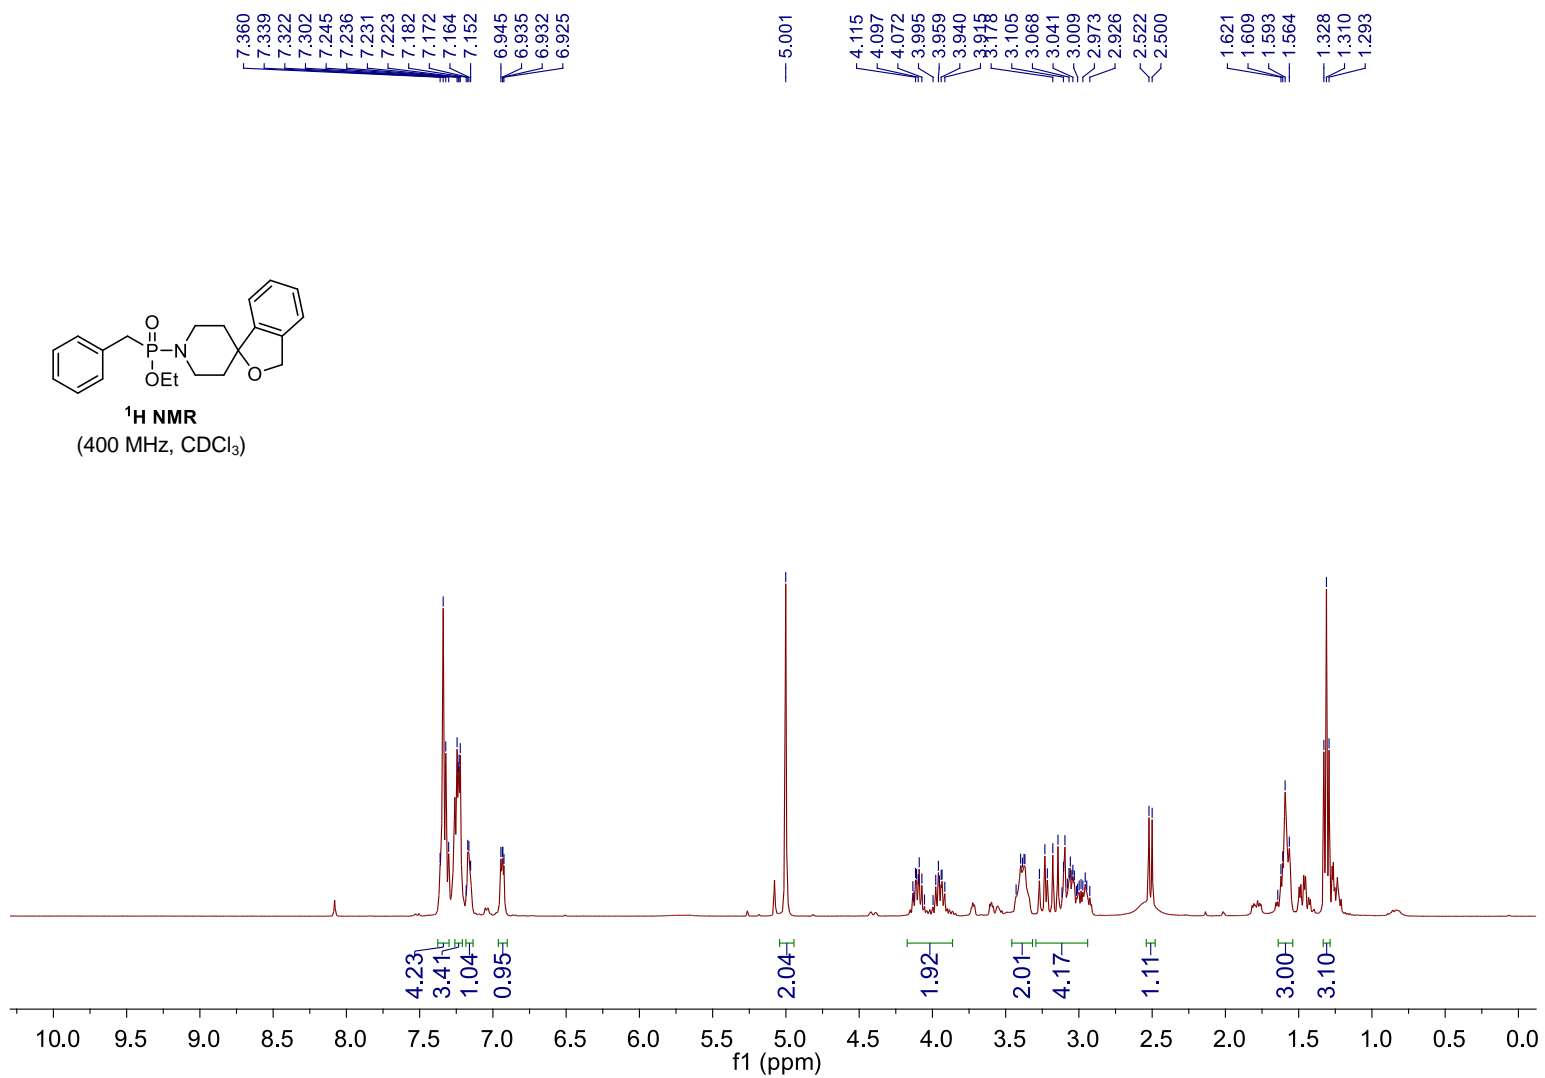

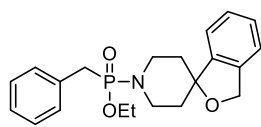

**<sup>13</sup>C NMR**  
(100 MHz, CDCl<sub>3</sub>)

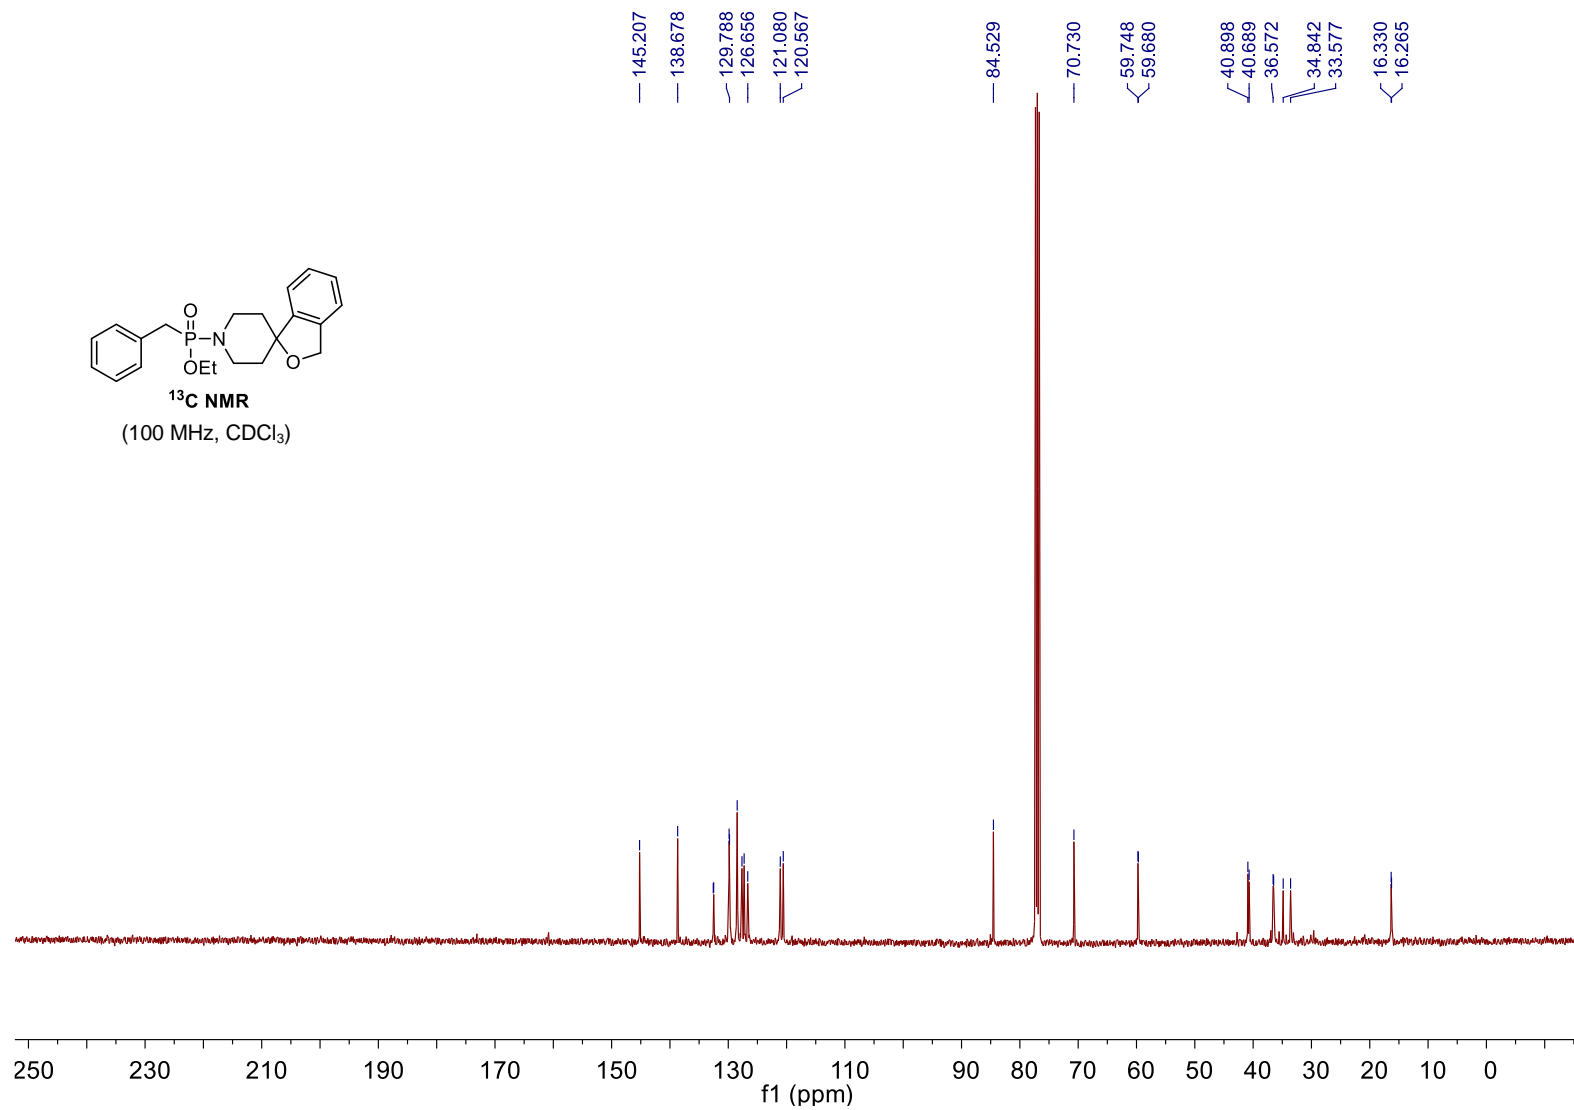

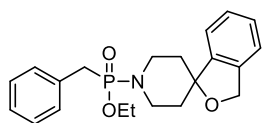

**<sup>31</sup>P NMR**  
(162 MHz, CDCl<sub>3</sub>)

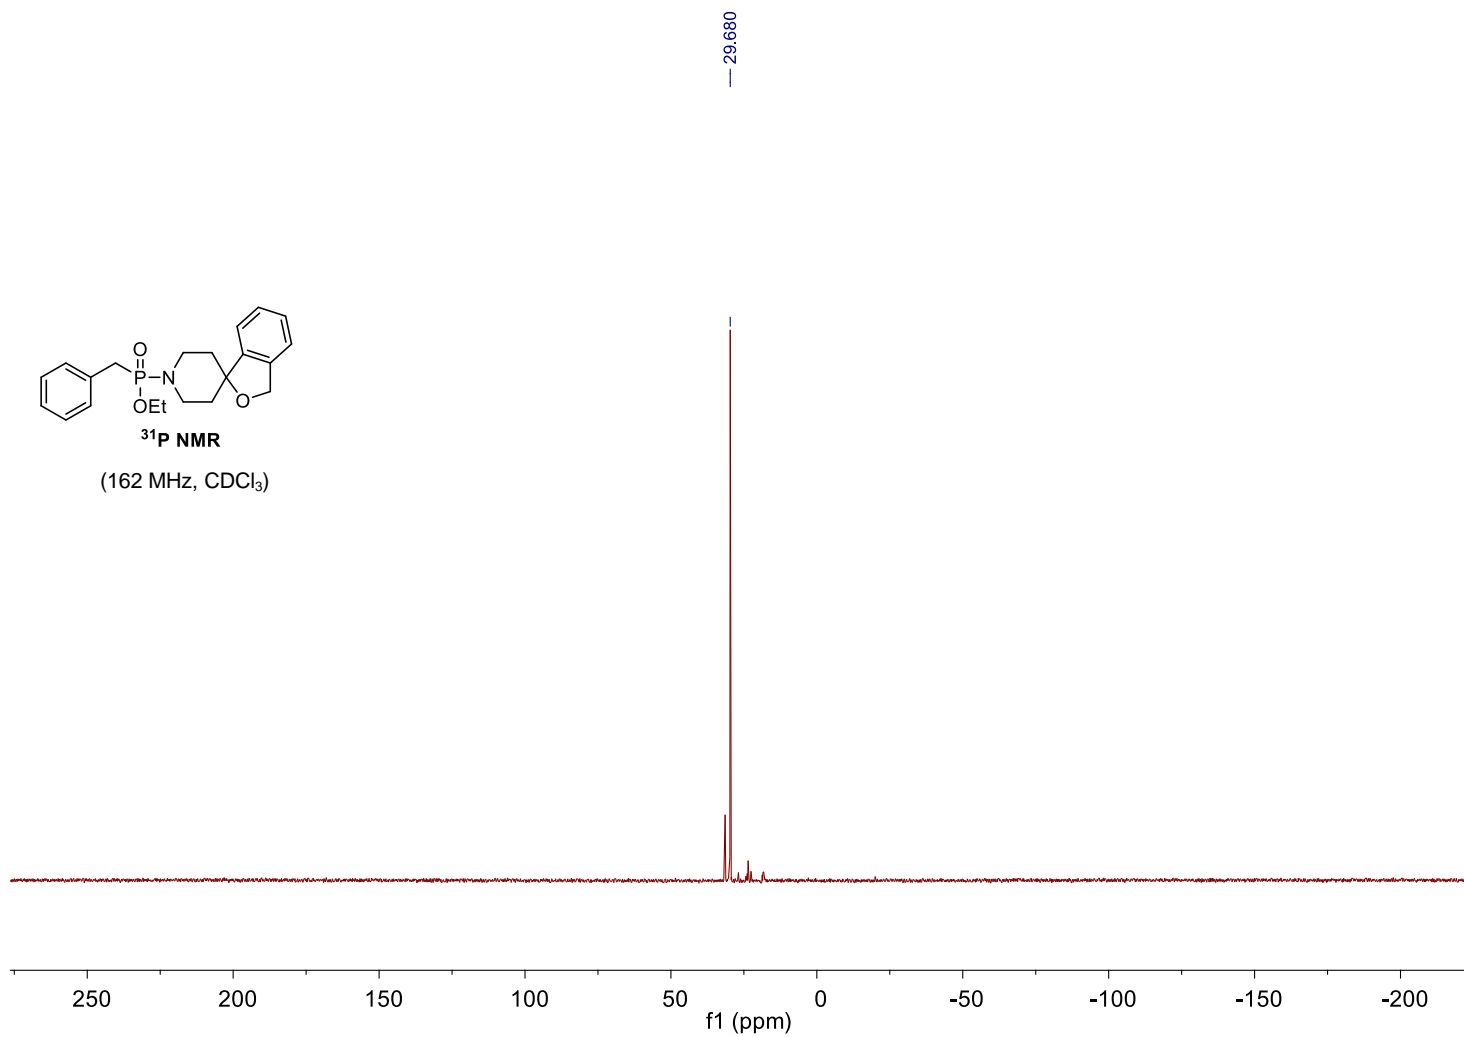

S211

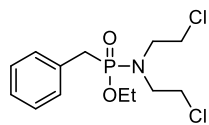

**<sup>1</sup>H NMR**  
(400 MHz, CDCl<sub>3</sub>)

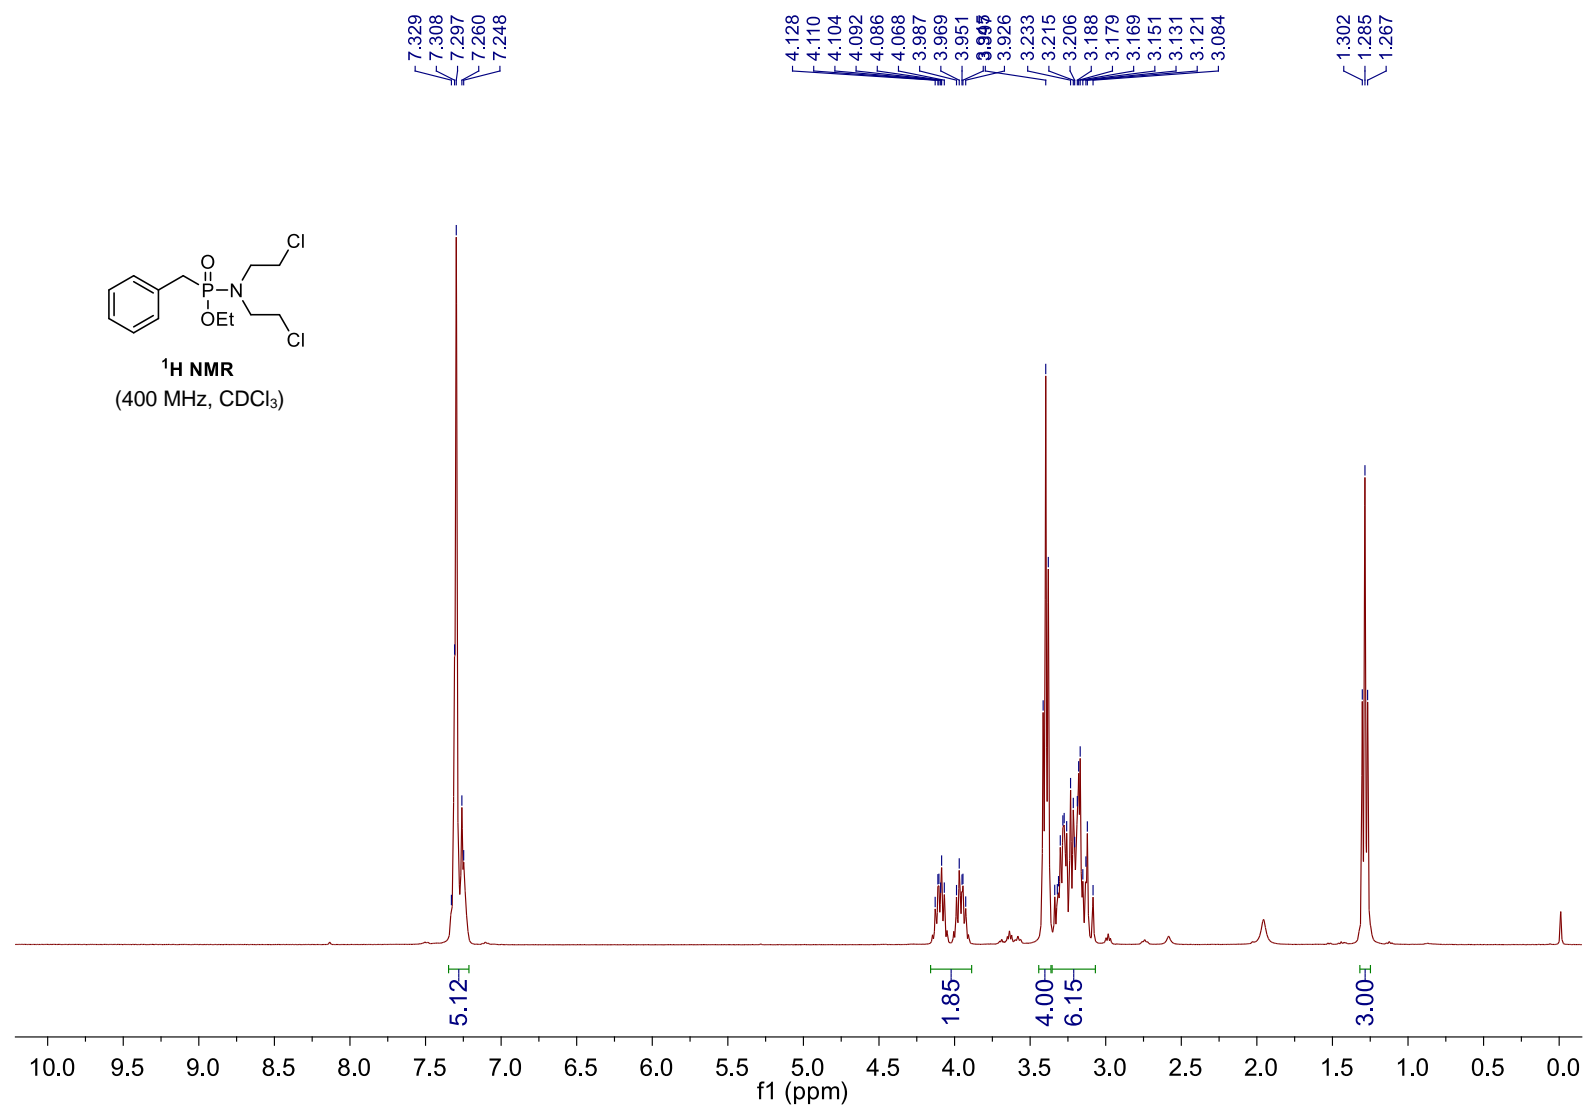

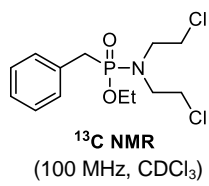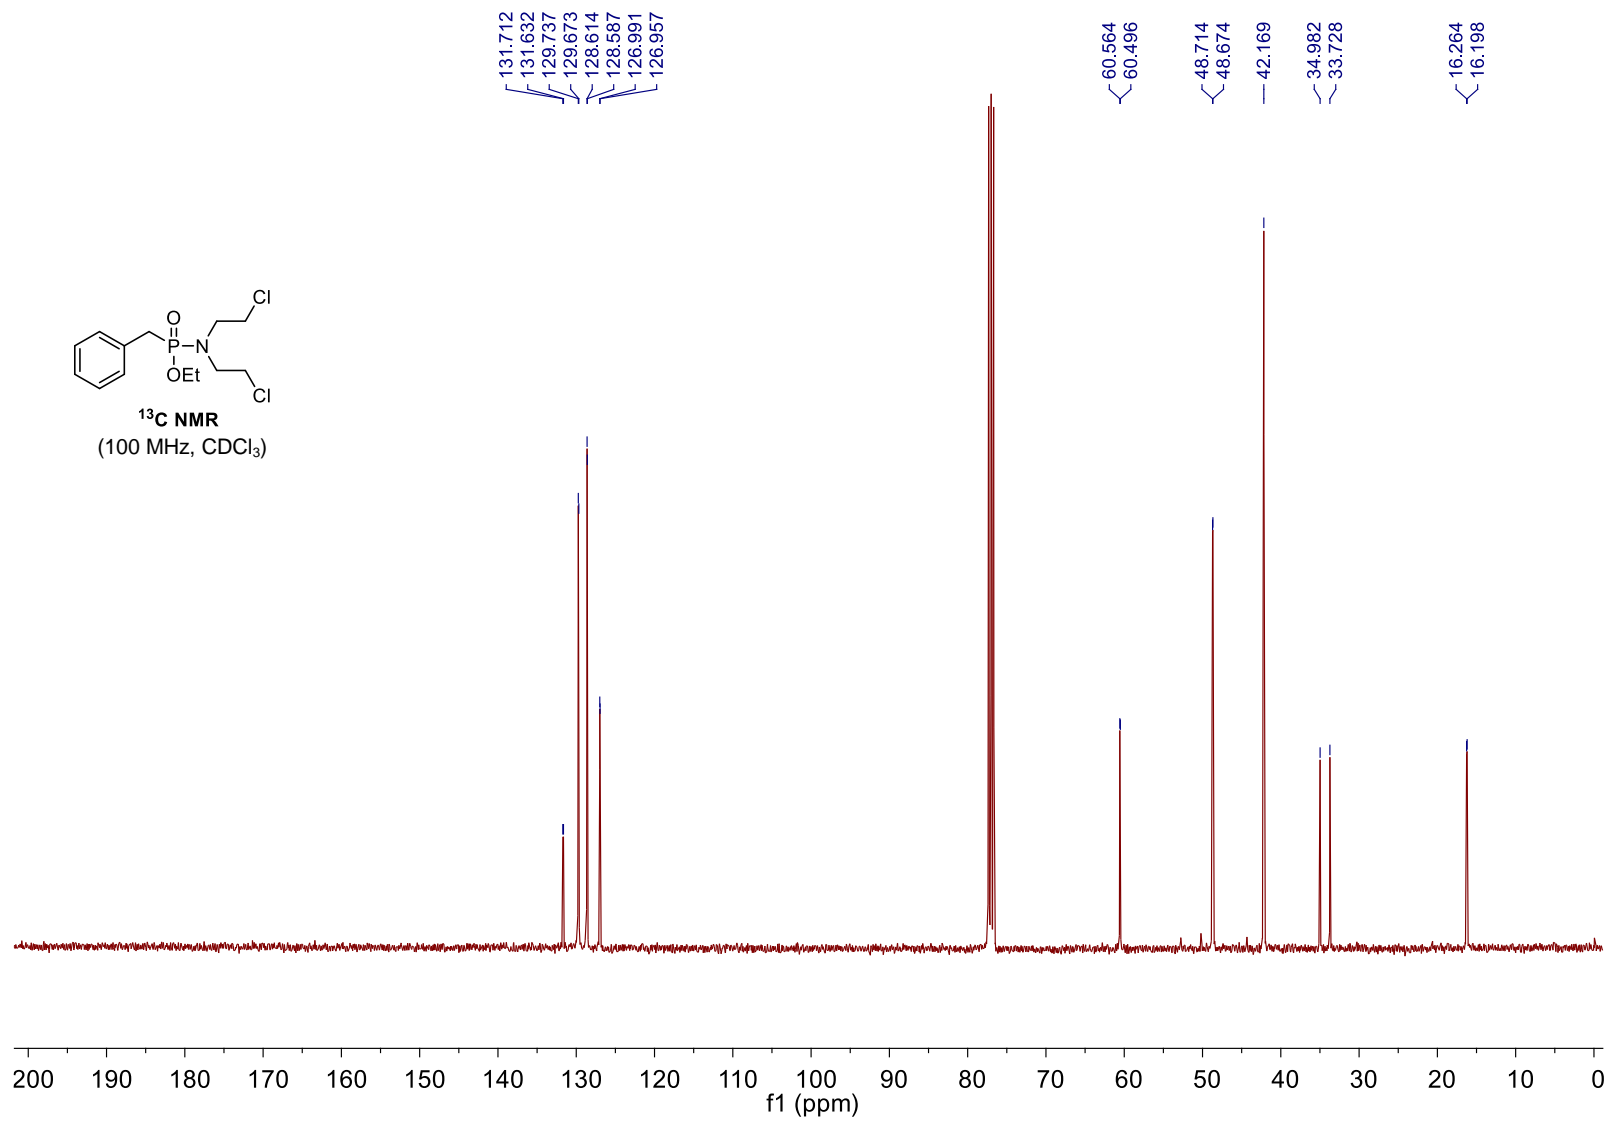

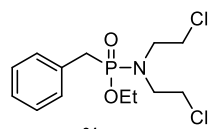

**<sup>31</sup>P NMR**  
(162 MHz, CDCl<sub>3</sub>)

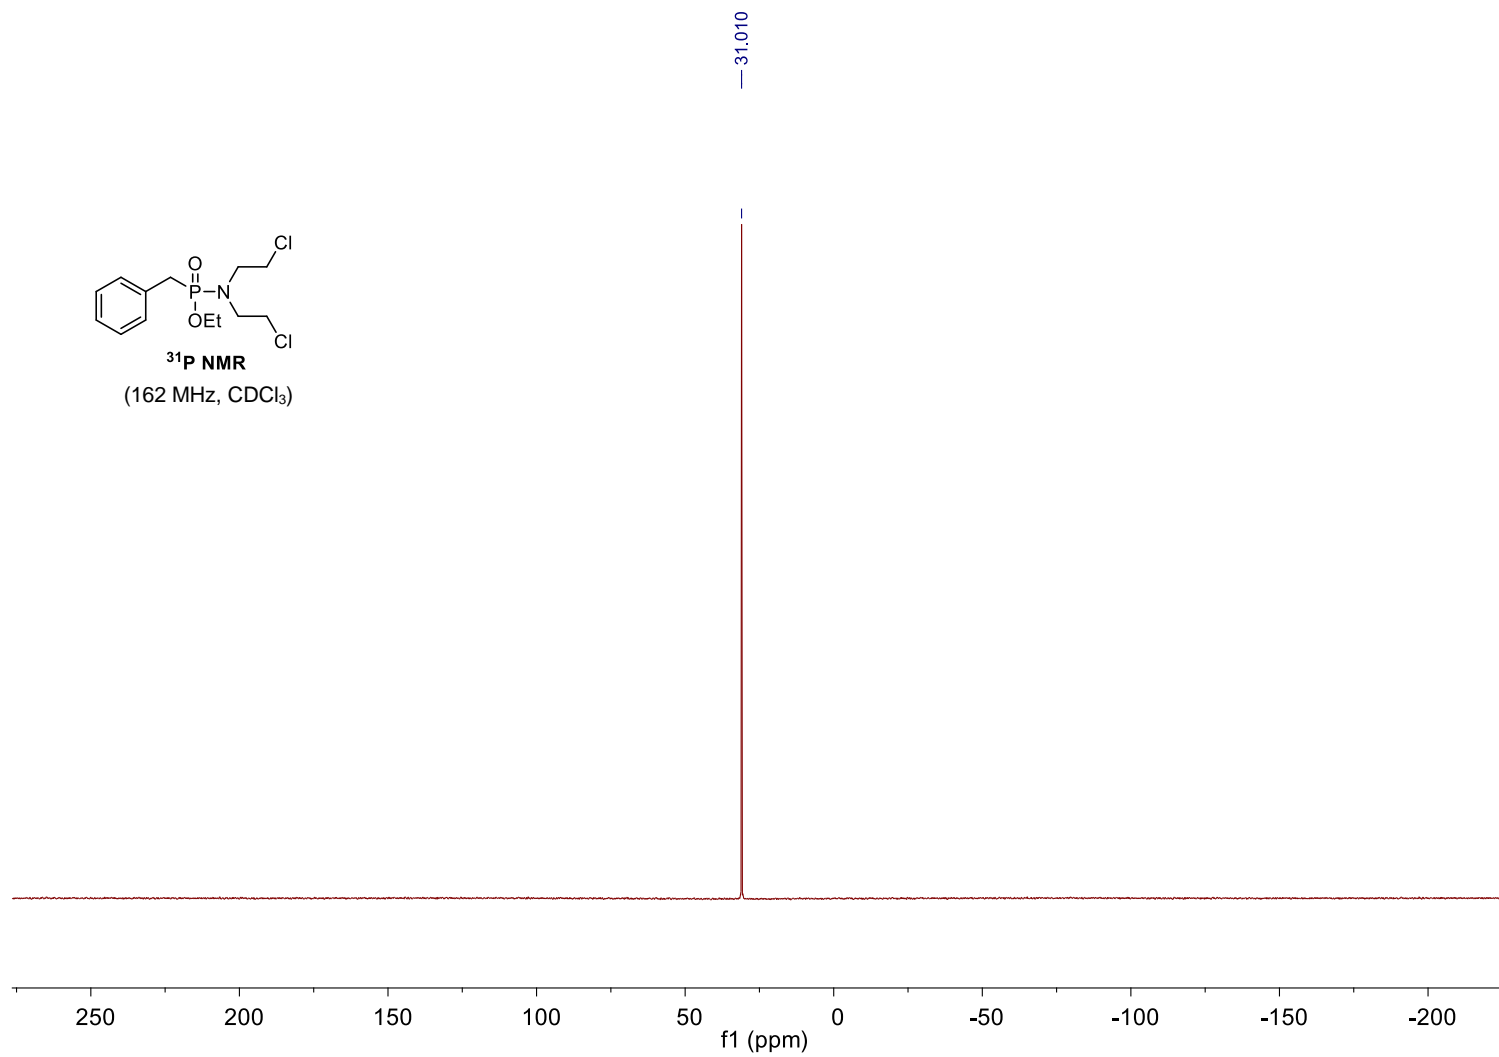

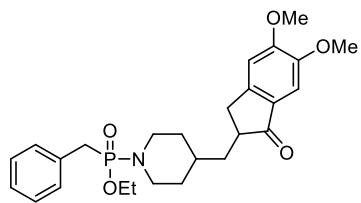

**<sup>1</sup>H NMR**  
(400 MHz, CDCl<sub>3</sub>)

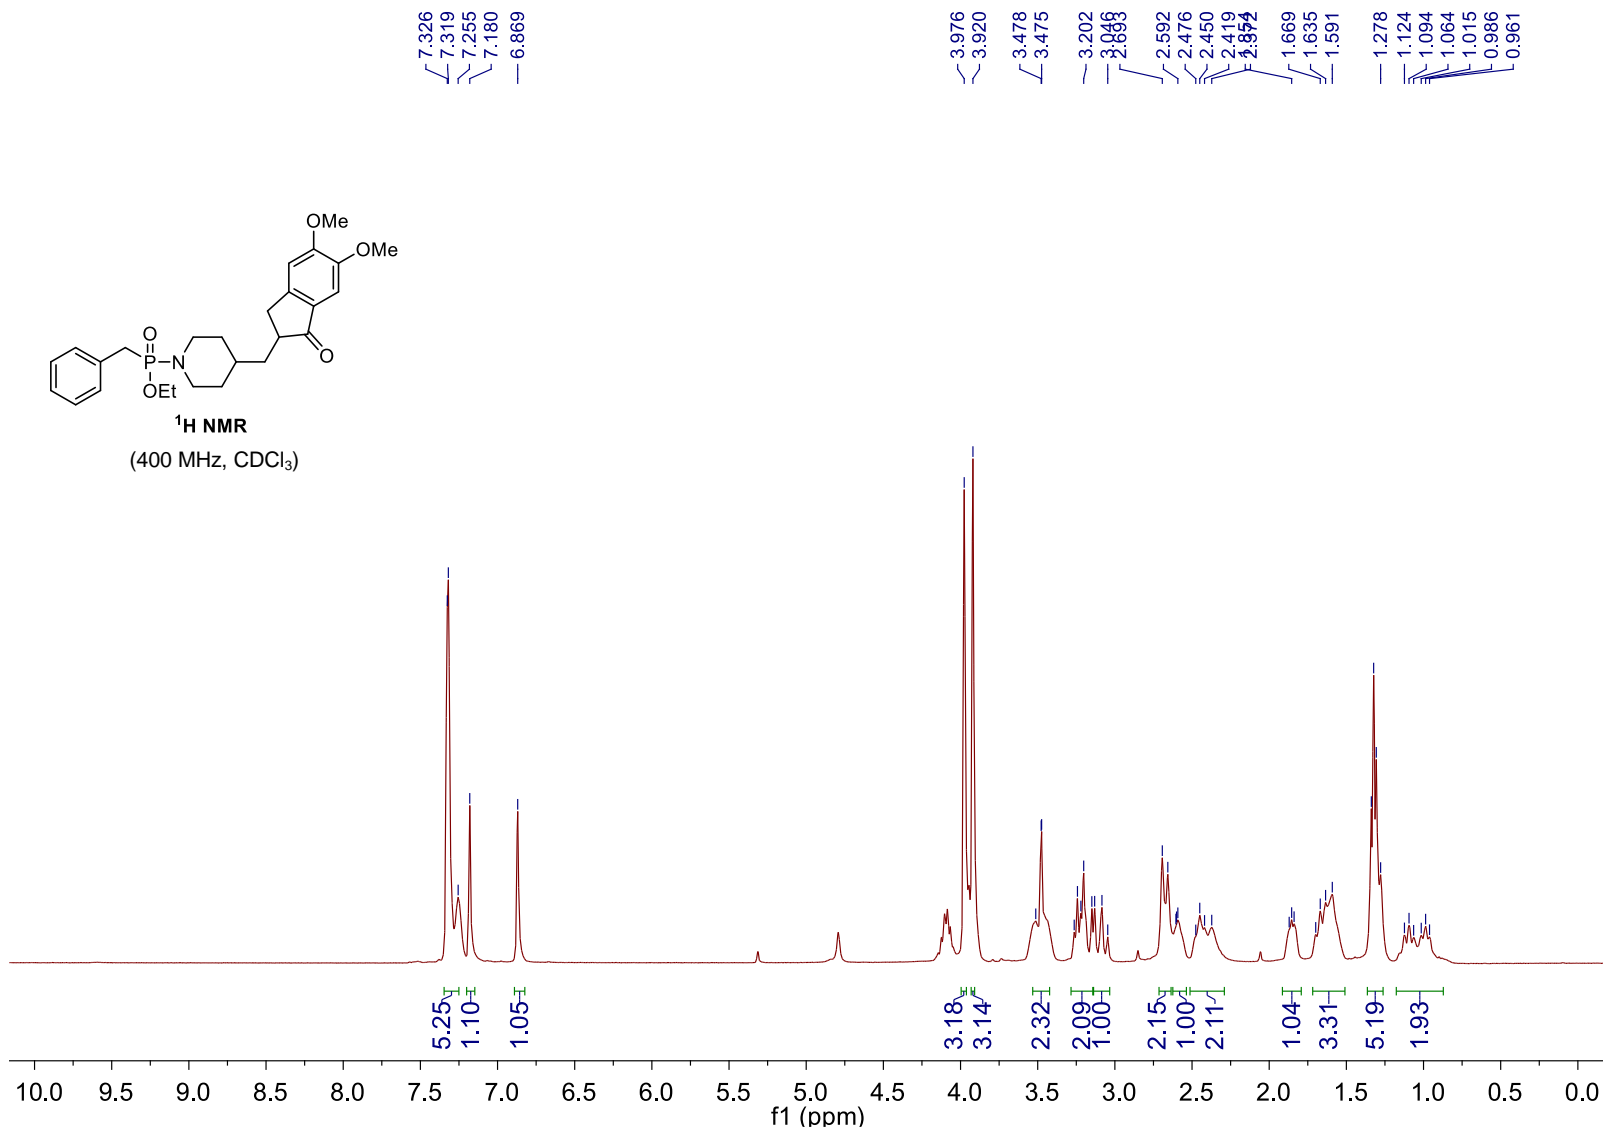

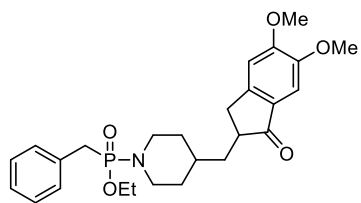

<sup>13</sup>C NMR  
(100 MHz, CDCl<sub>3</sub>)

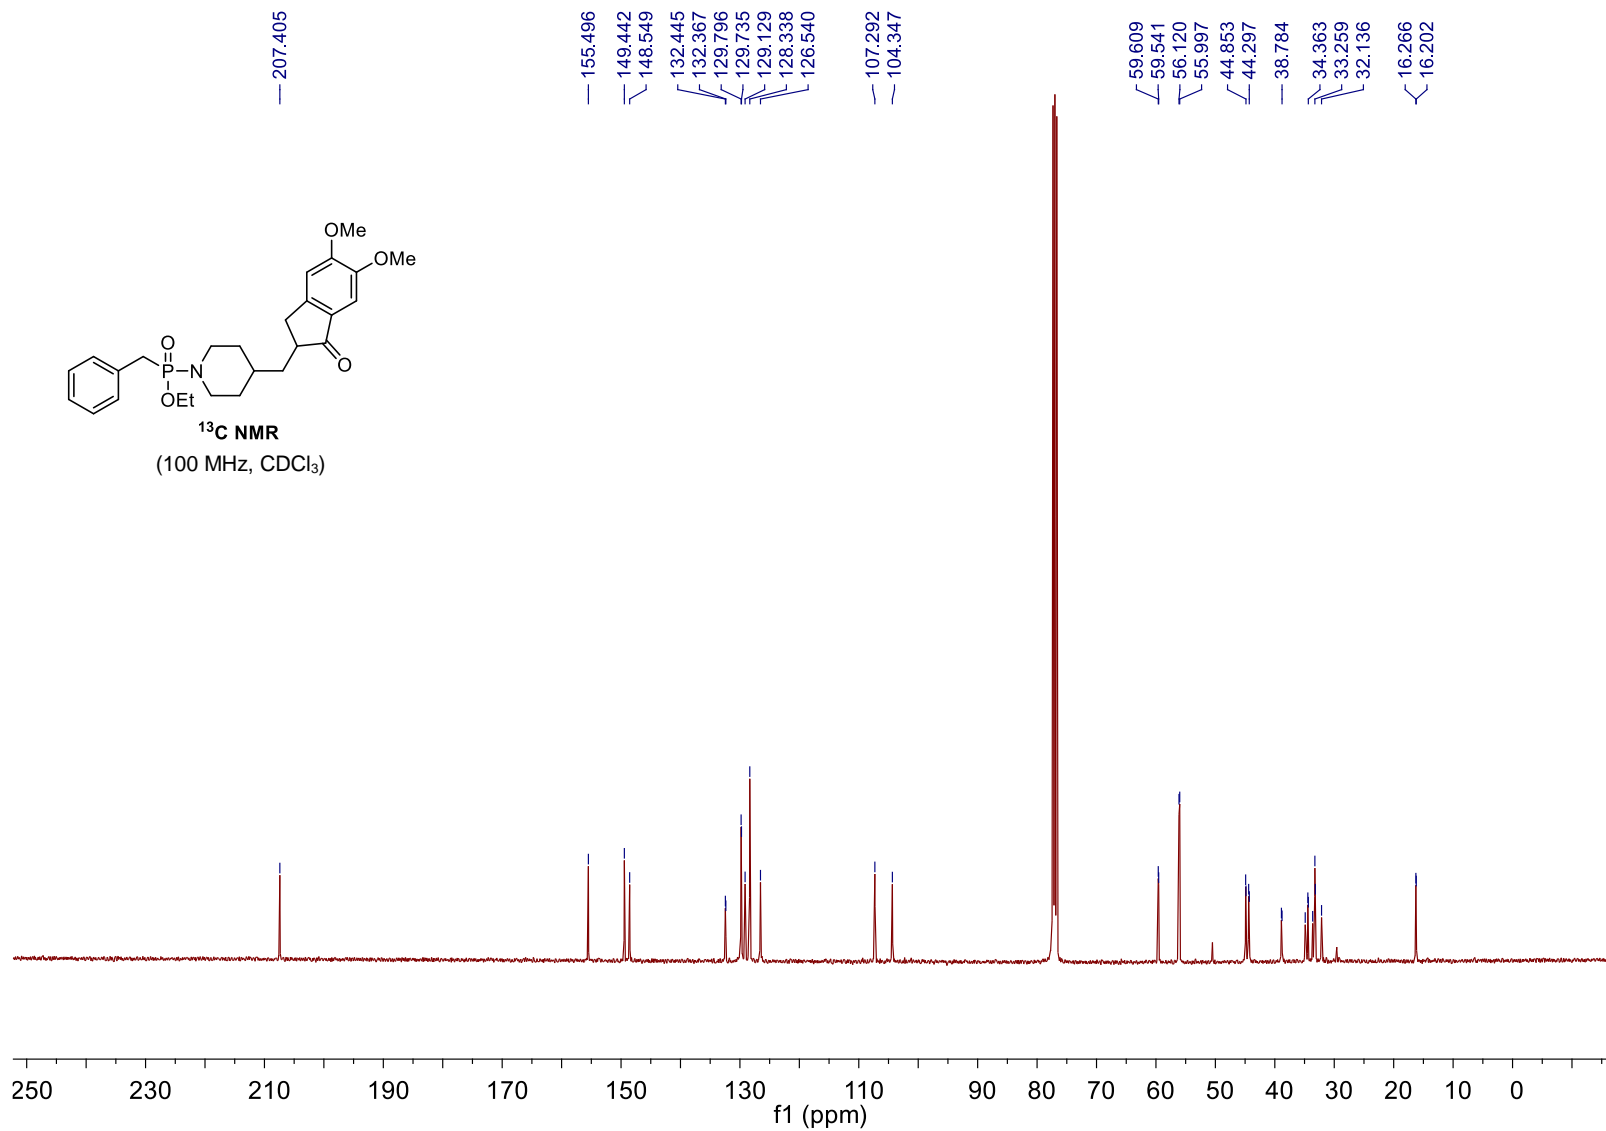



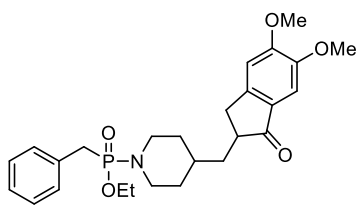

**<sup>31</sup>P NMR**  
(162 MHz, CDCl<sub>3</sub>)

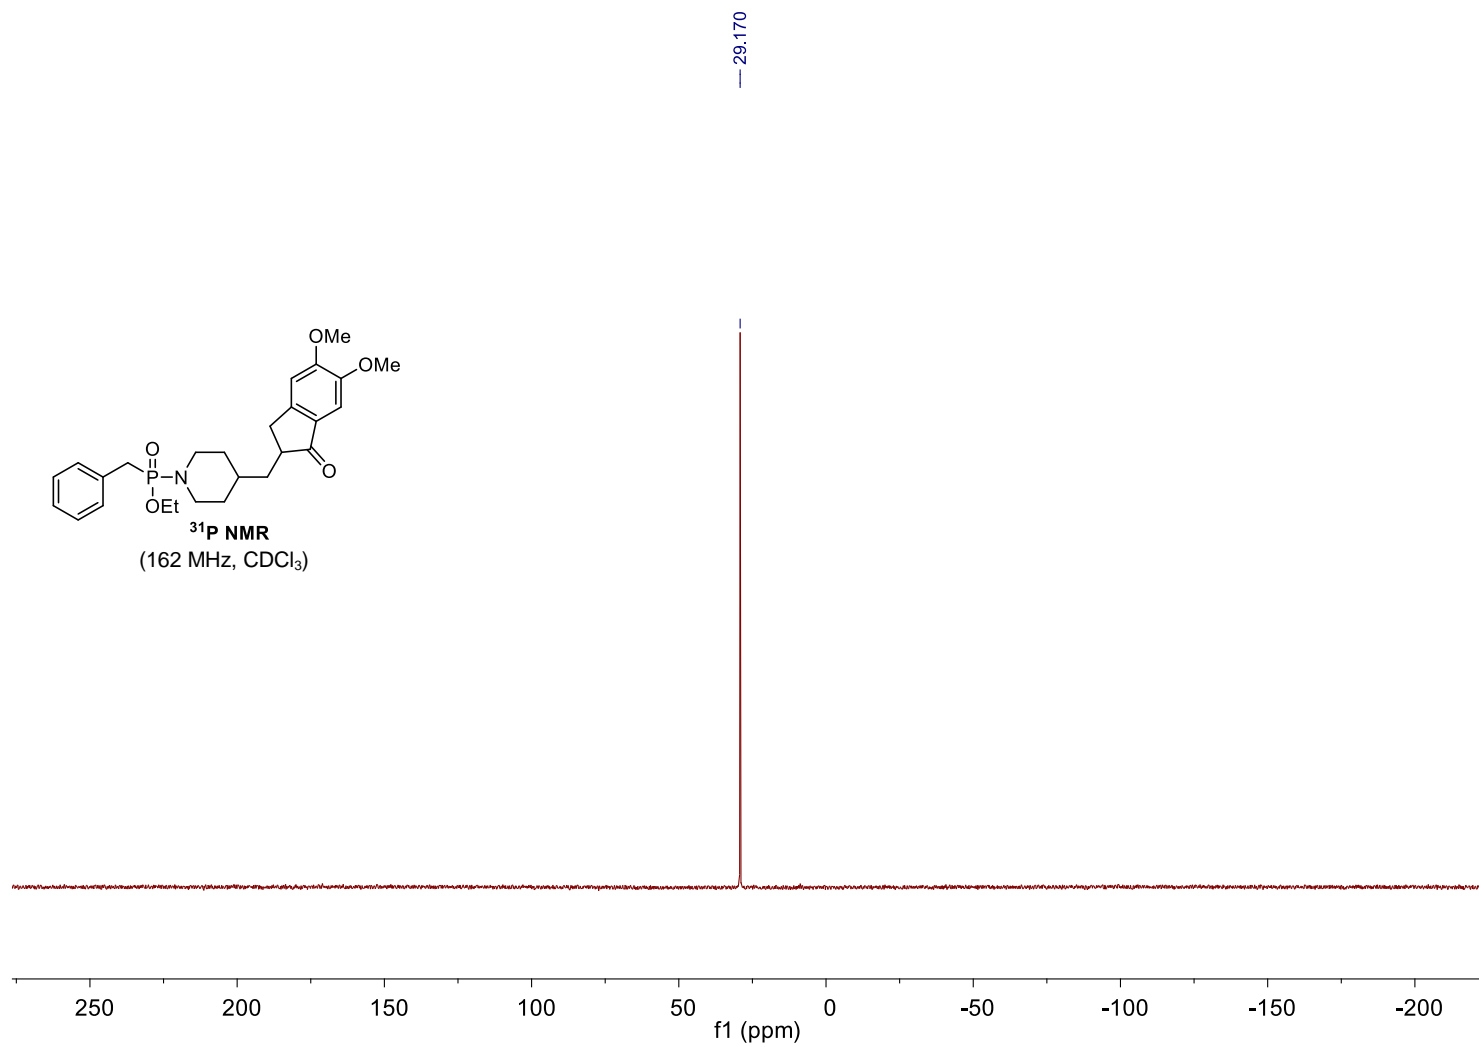

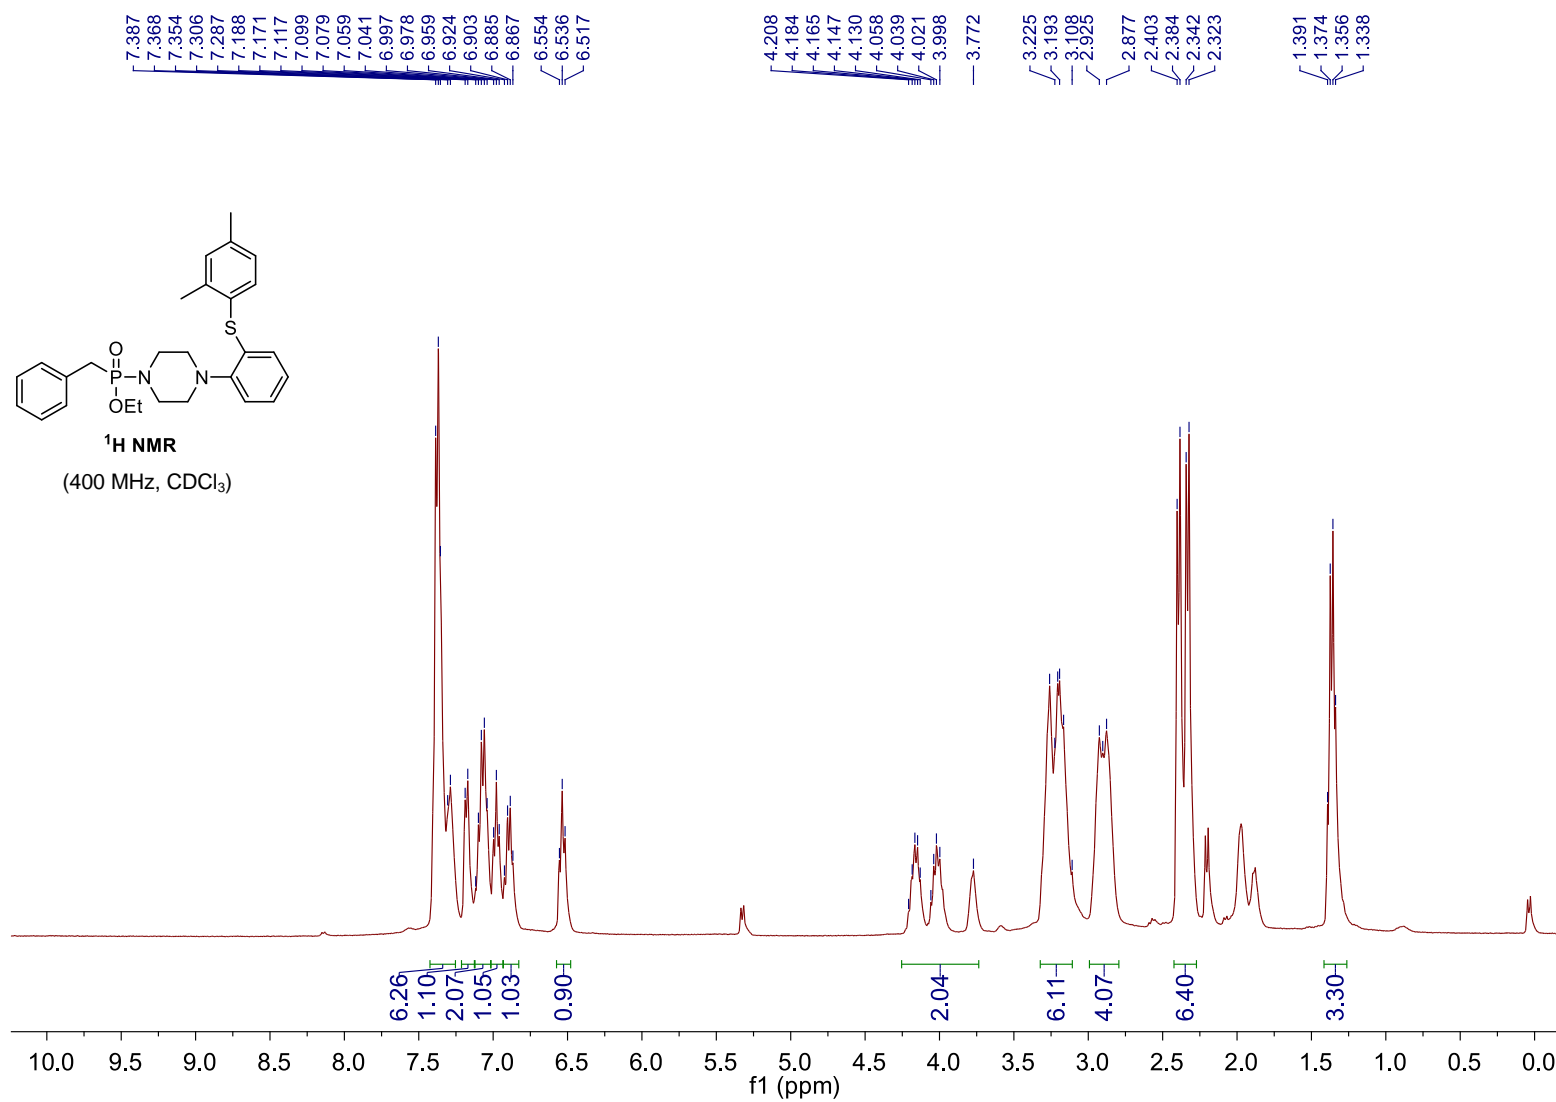

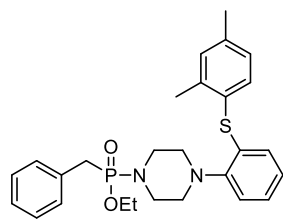

**<sup>13</sup>C NMR**  
(100 MHz, CDCl<sub>3</sub>)

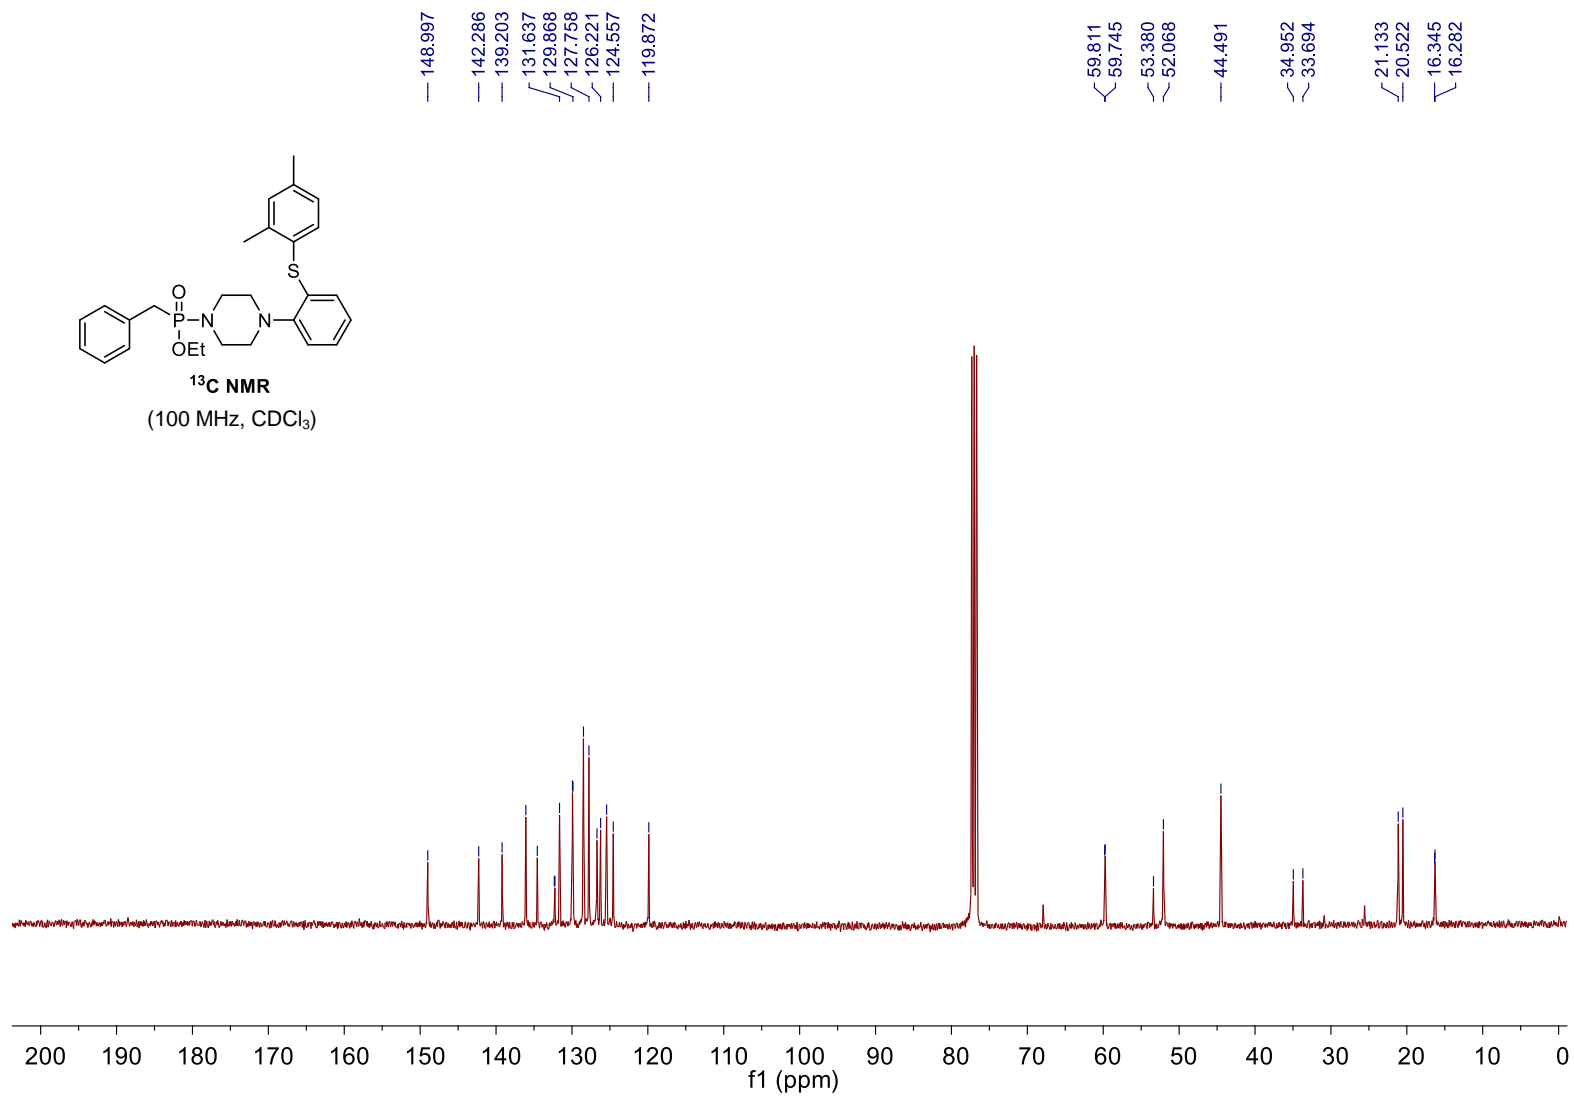

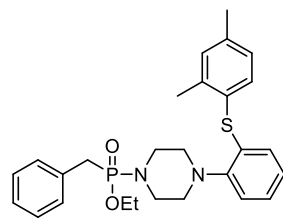

<sup>31</sup>P NMR  
(162 MHz, CDCl<sub>3</sub>)

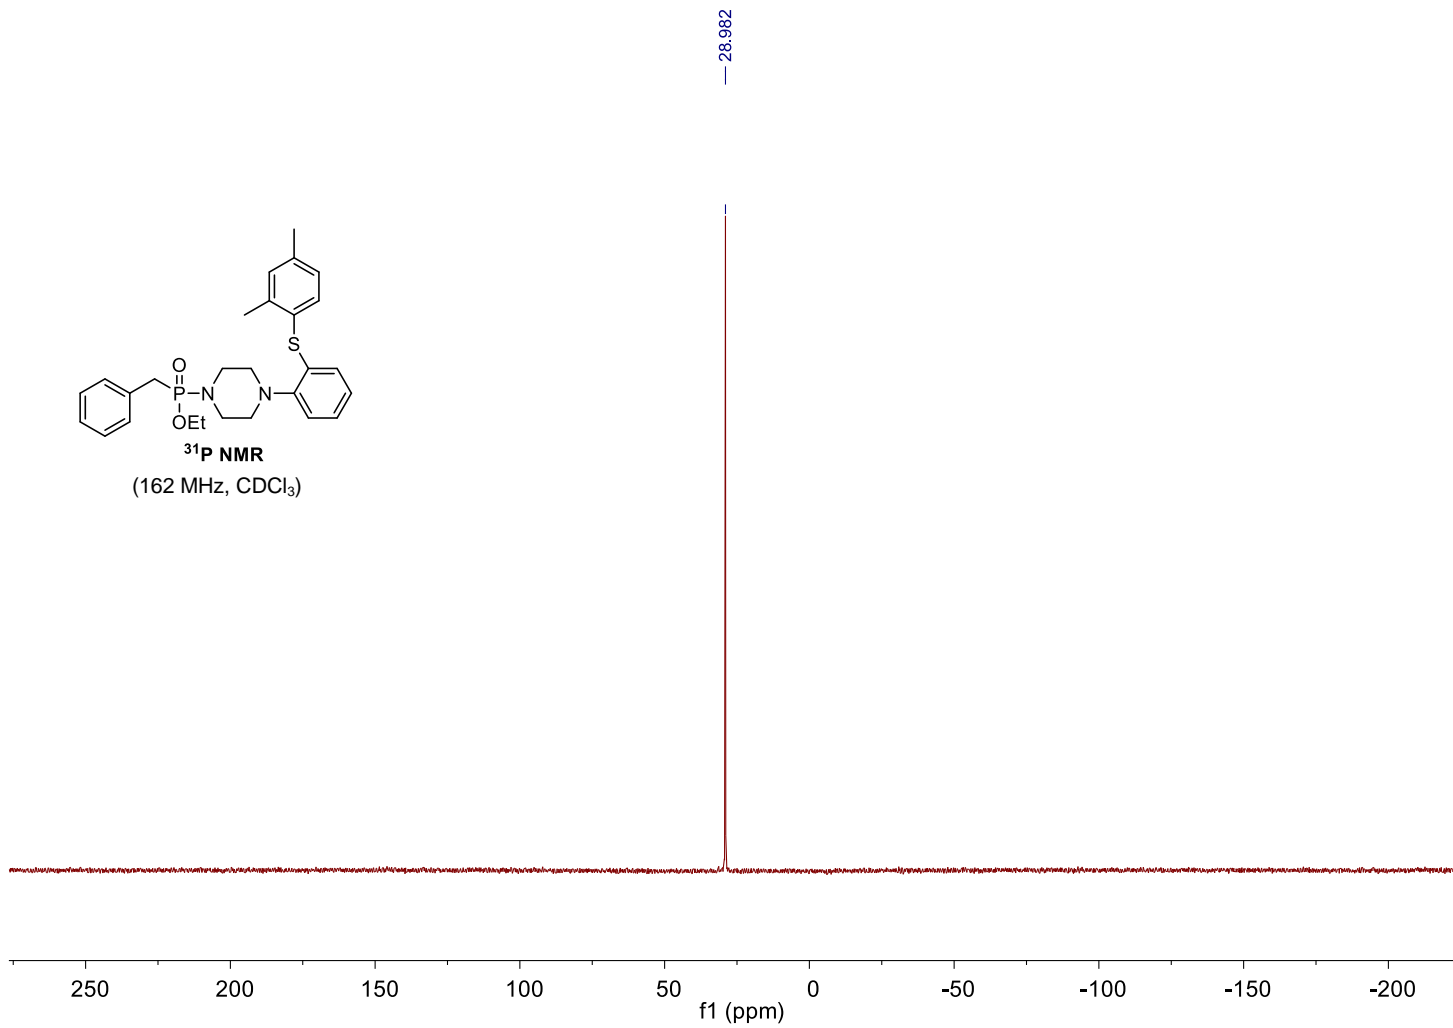

S220

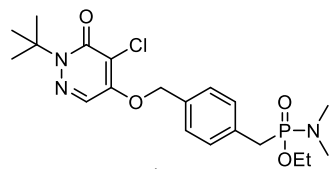

**<sup>1</sup>H NMR**  
(400 MHz, CDCl<sub>3</sub>)

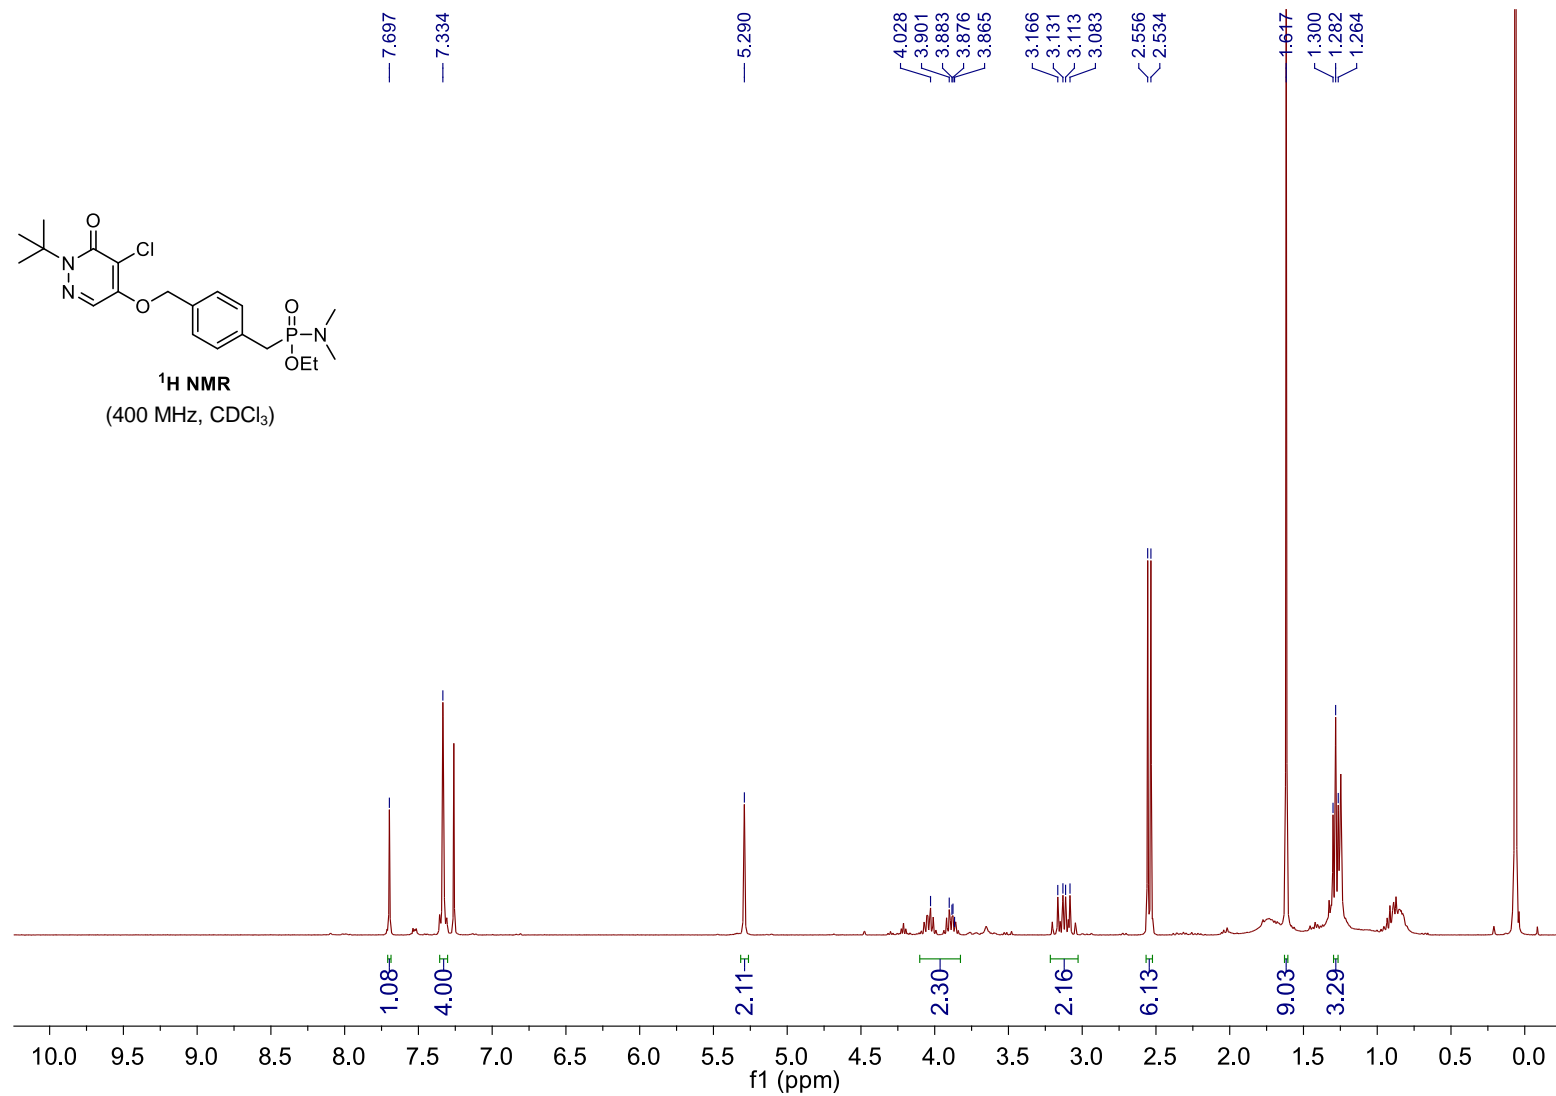

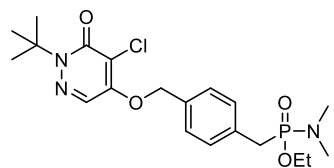

**<sup>13</sup>C NMR**  
(100 MHz, CDCl<sub>3</sub>)

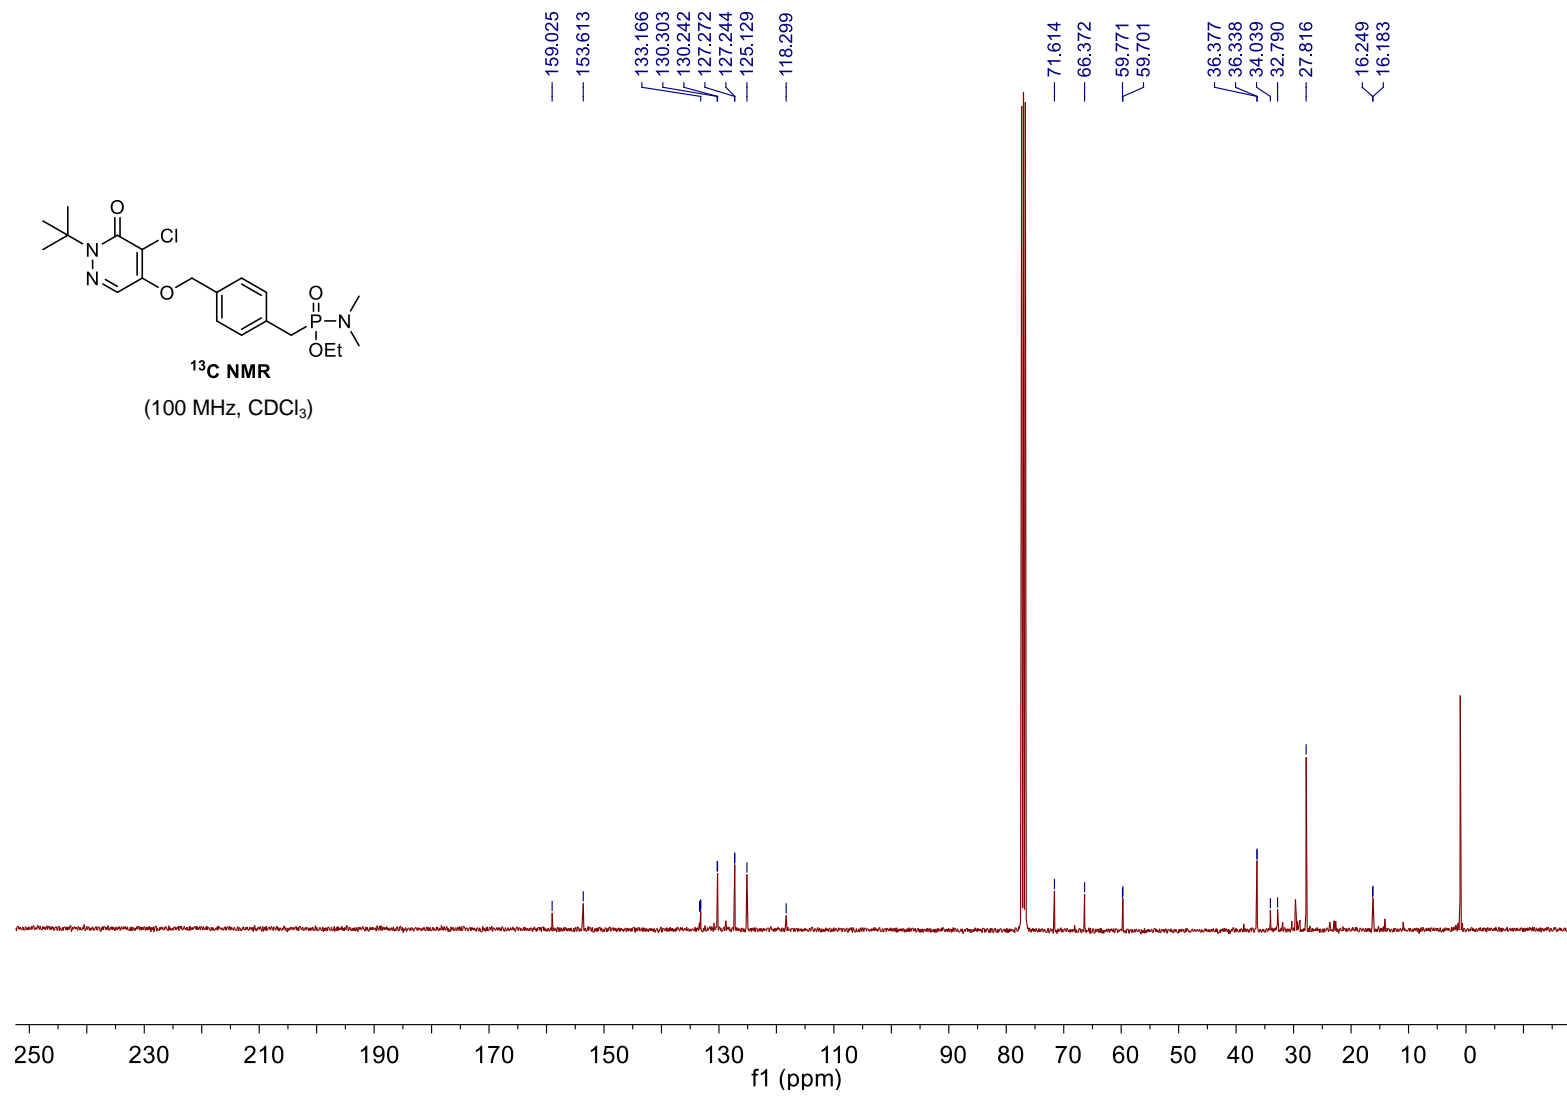

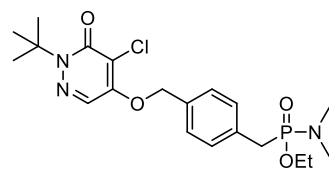

<sup>31</sup>P NMR  
(162 MHz, CDCl<sub>3</sub>)

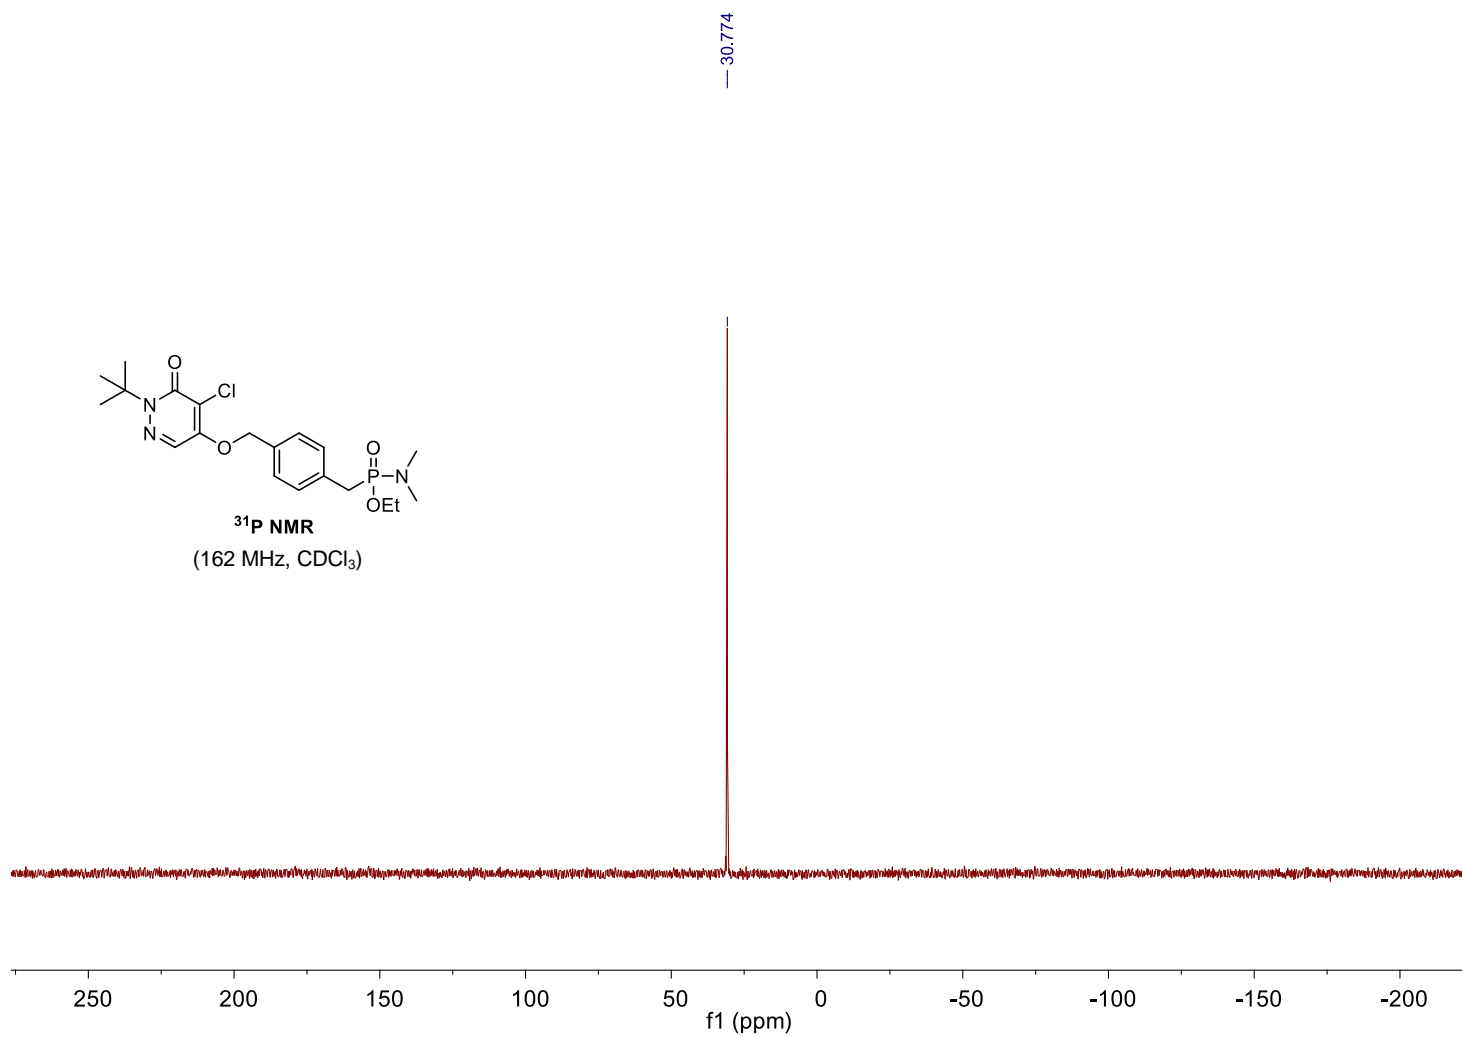

S223

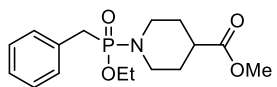

**<sup>1</sup>H NMR**  
(400 MHz, CDCl<sub>3</sub>)

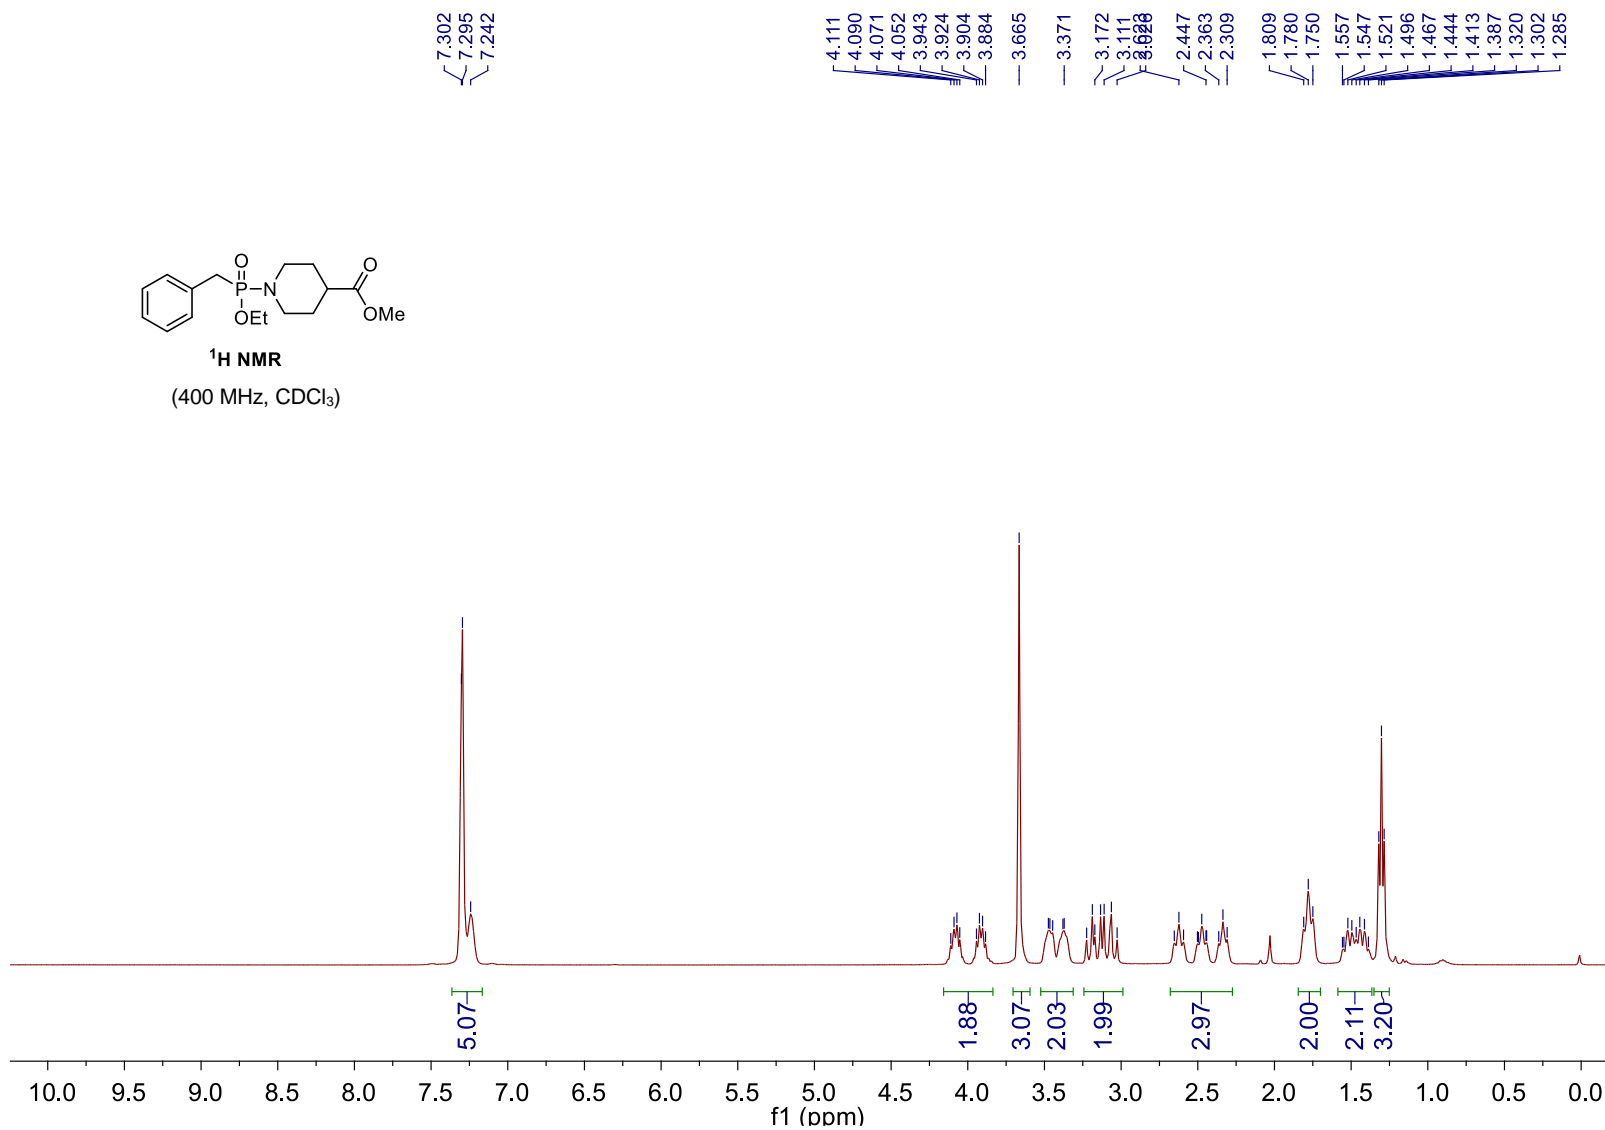



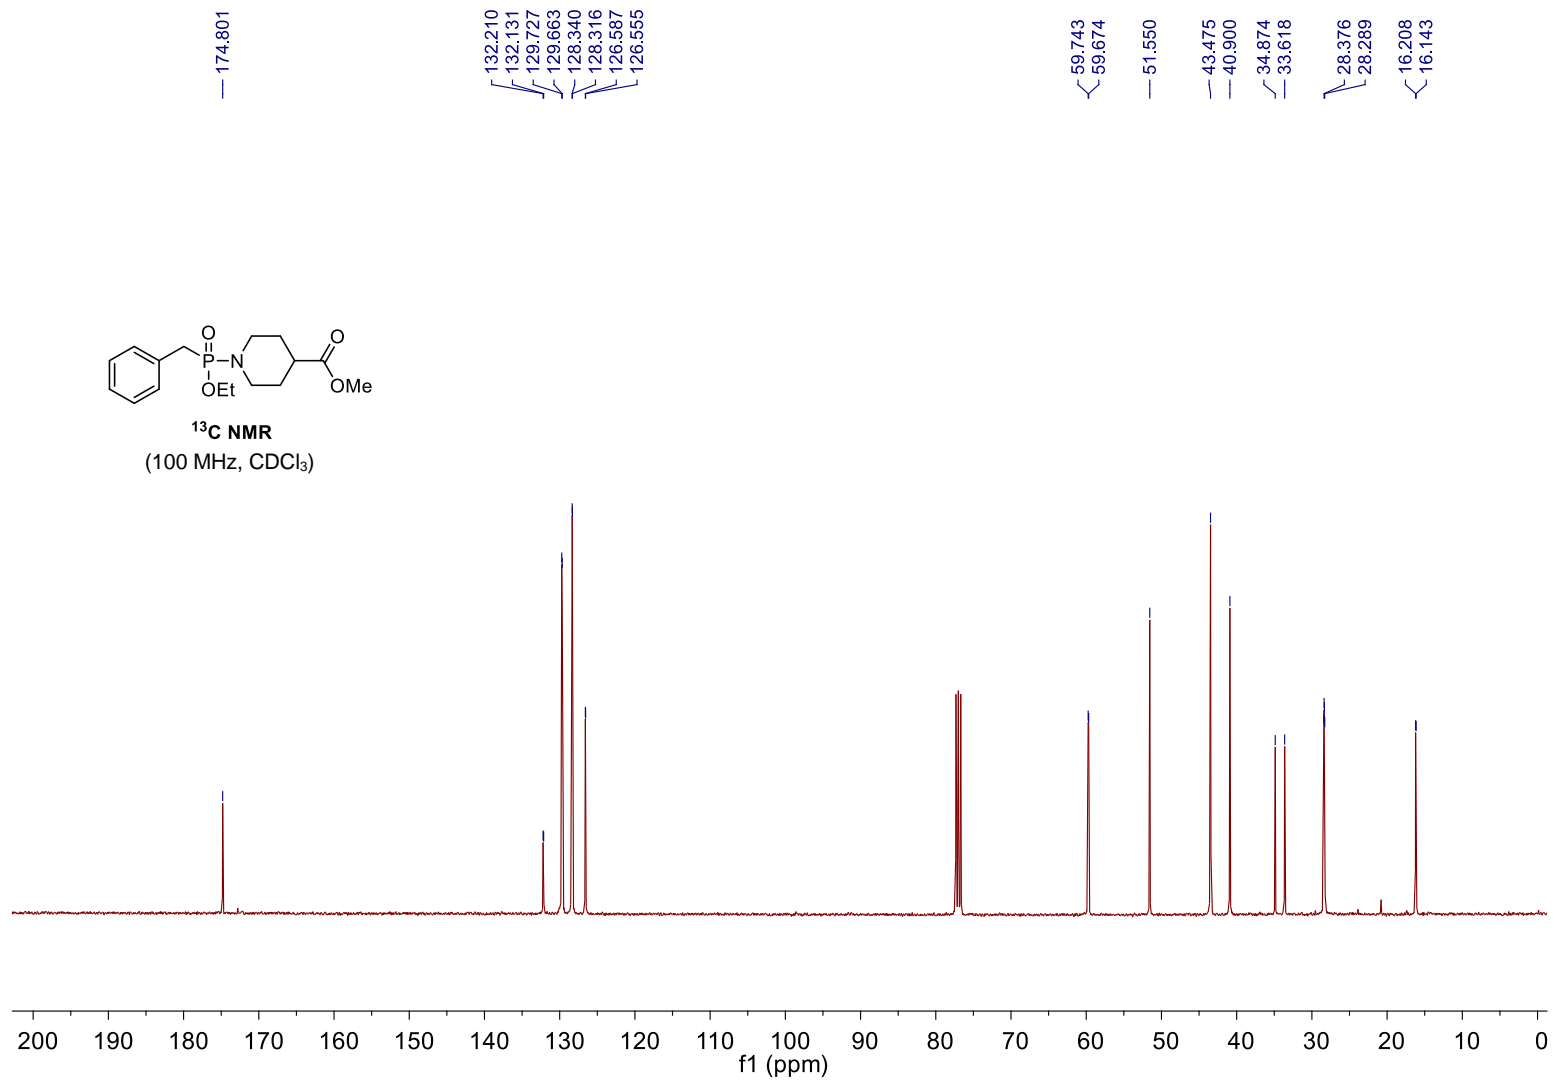

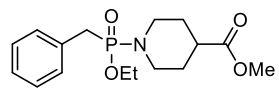

**<sup>31</sup>P NMR**  
(162 MHz, CDCl<sub>3</sub>)

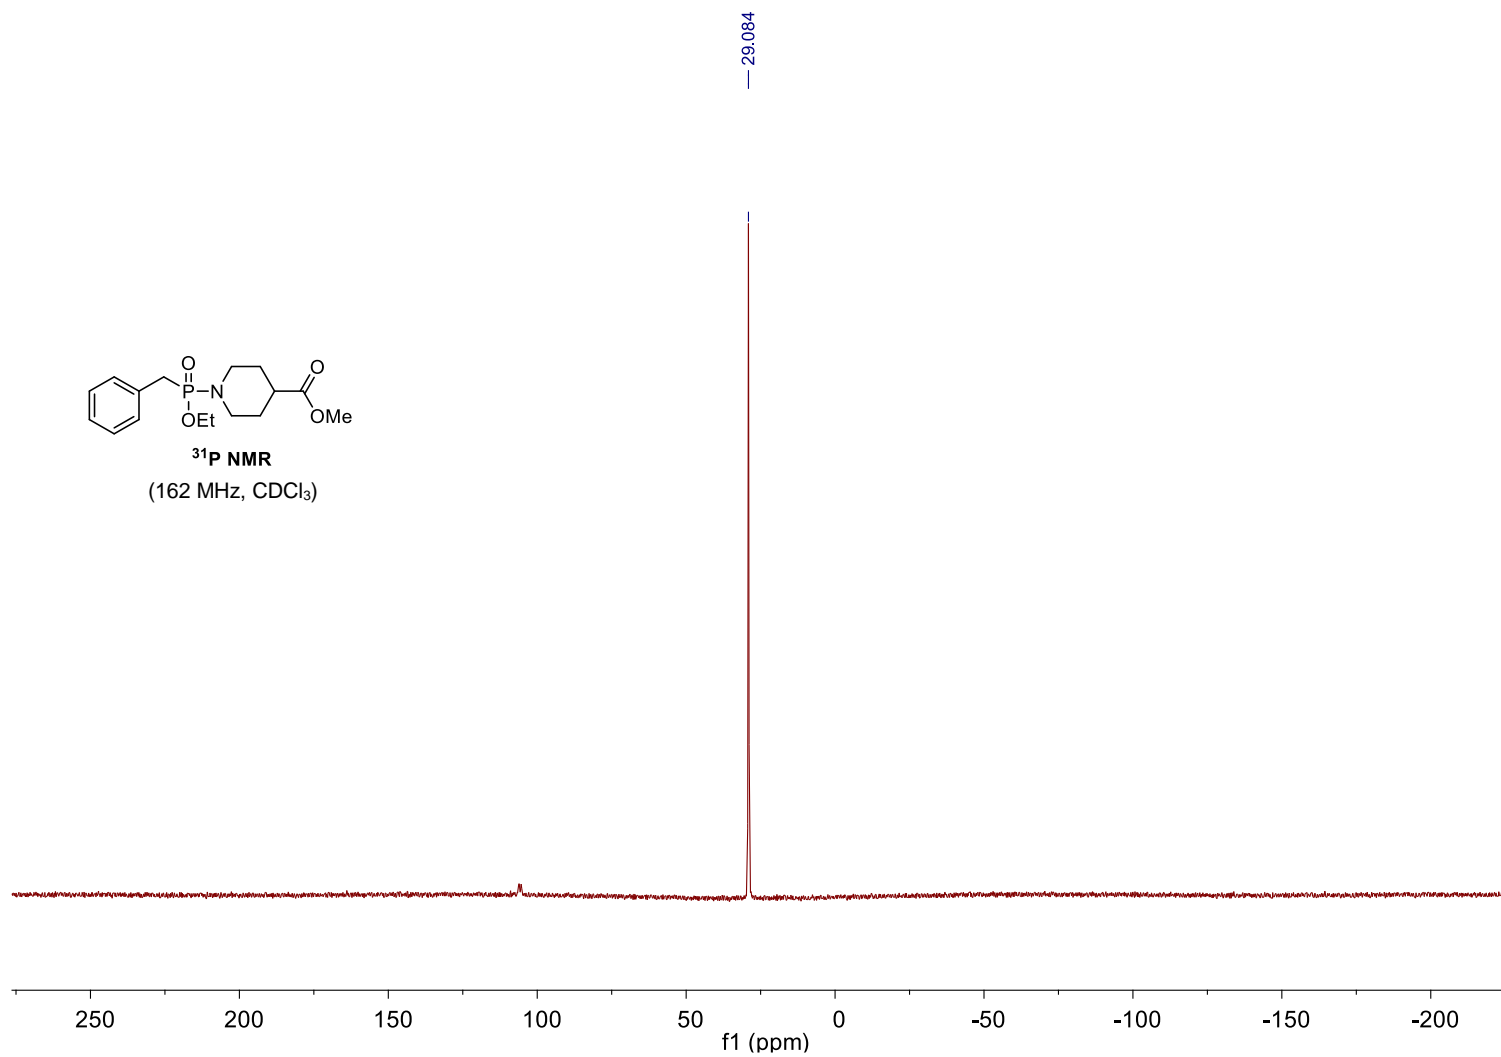

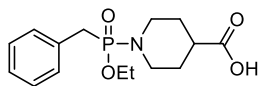

<sup>13</sup>C NMR

(100 MHz, MeOD)

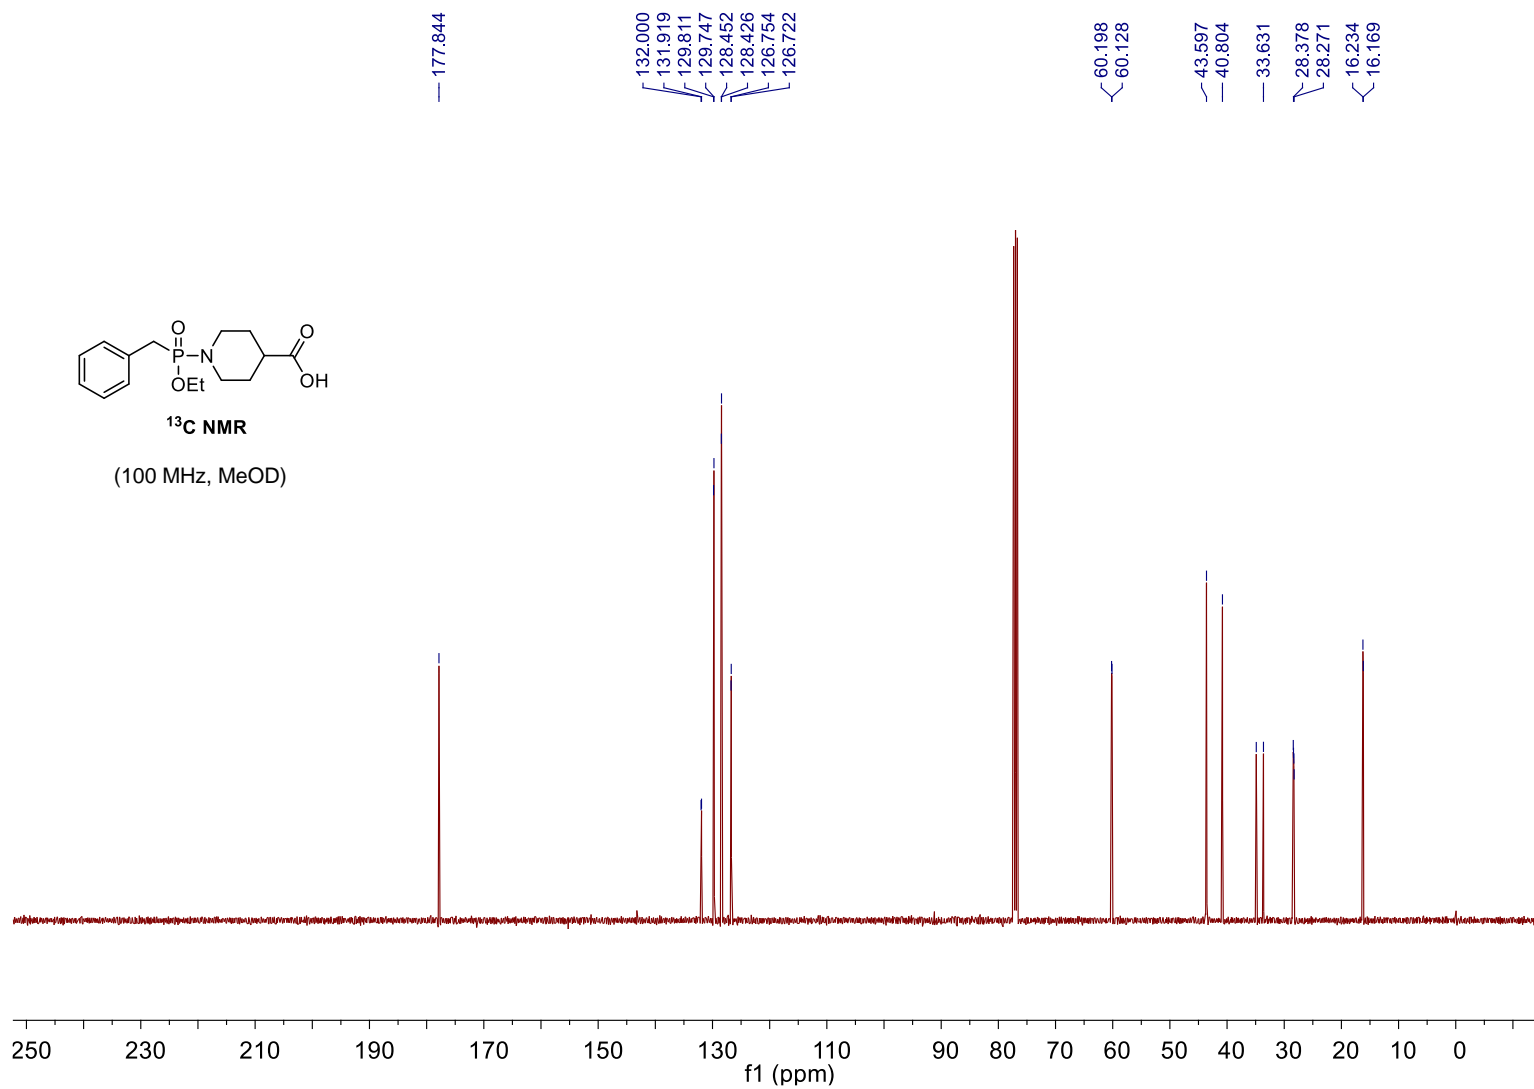

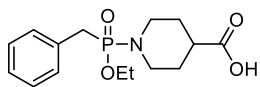

**<sup>1</sup>H NMR**  
(400 MHz, MeOD)

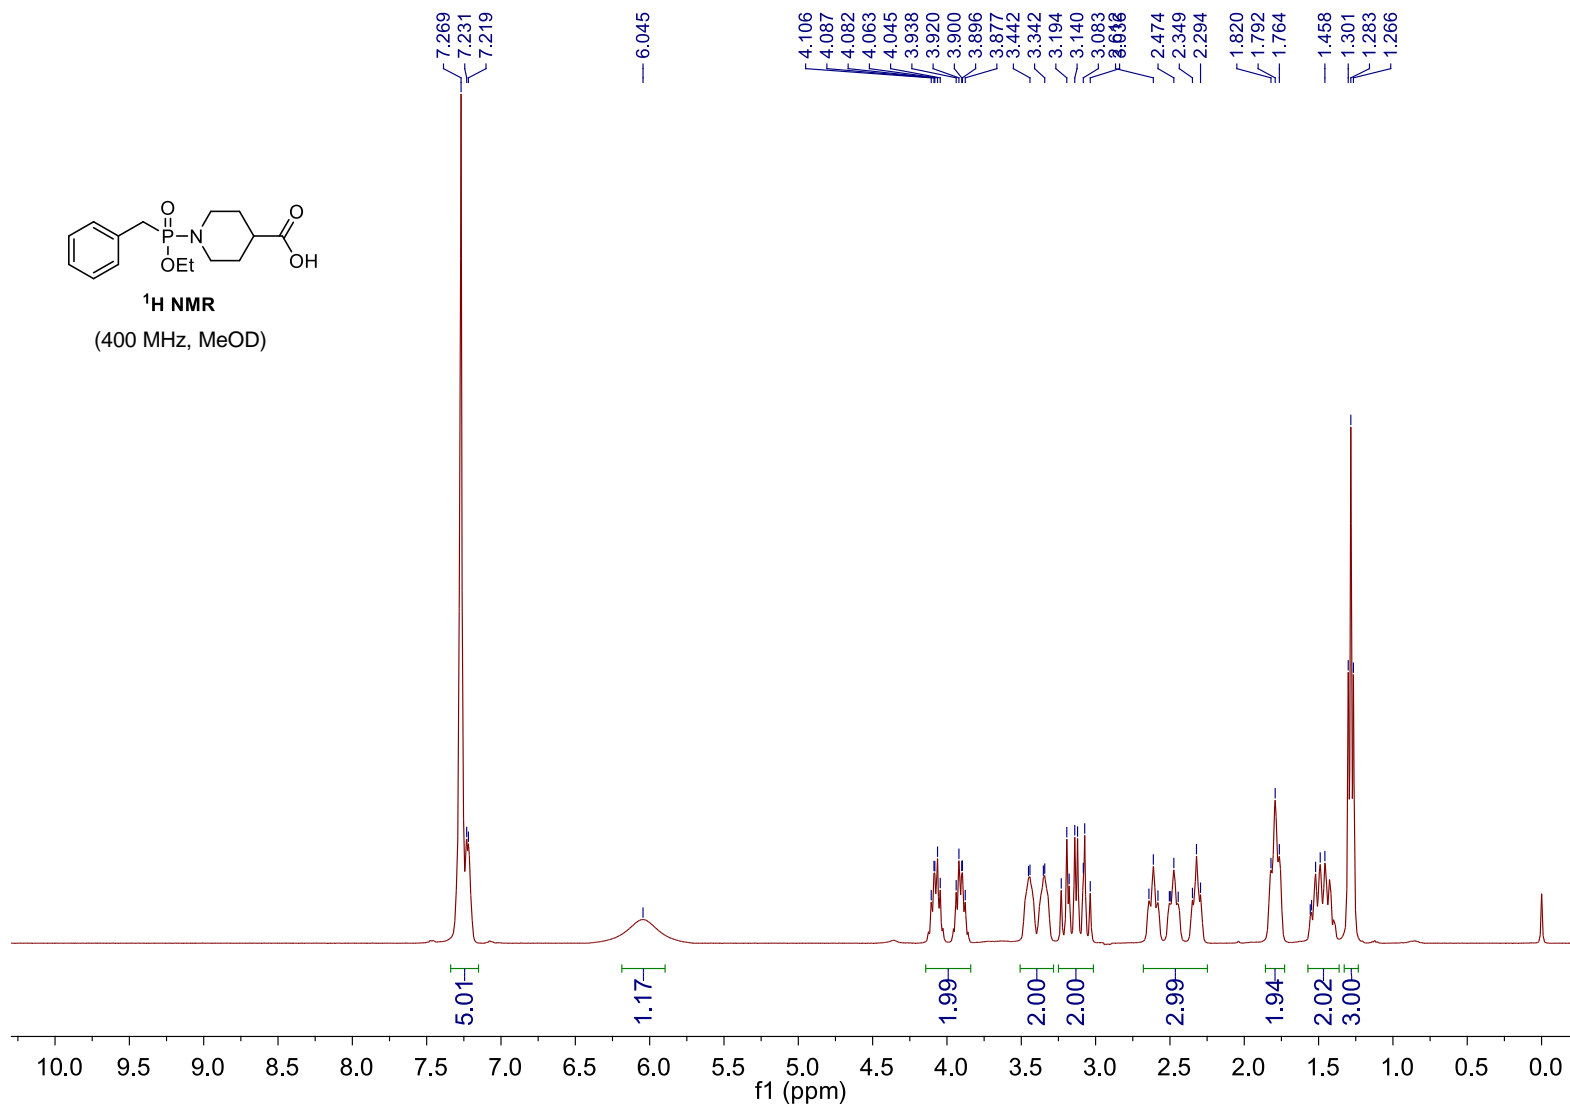

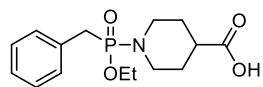

**<sup>31</sup>P NMR**  
(162 MHz, CDCl<sub>3</sub>)

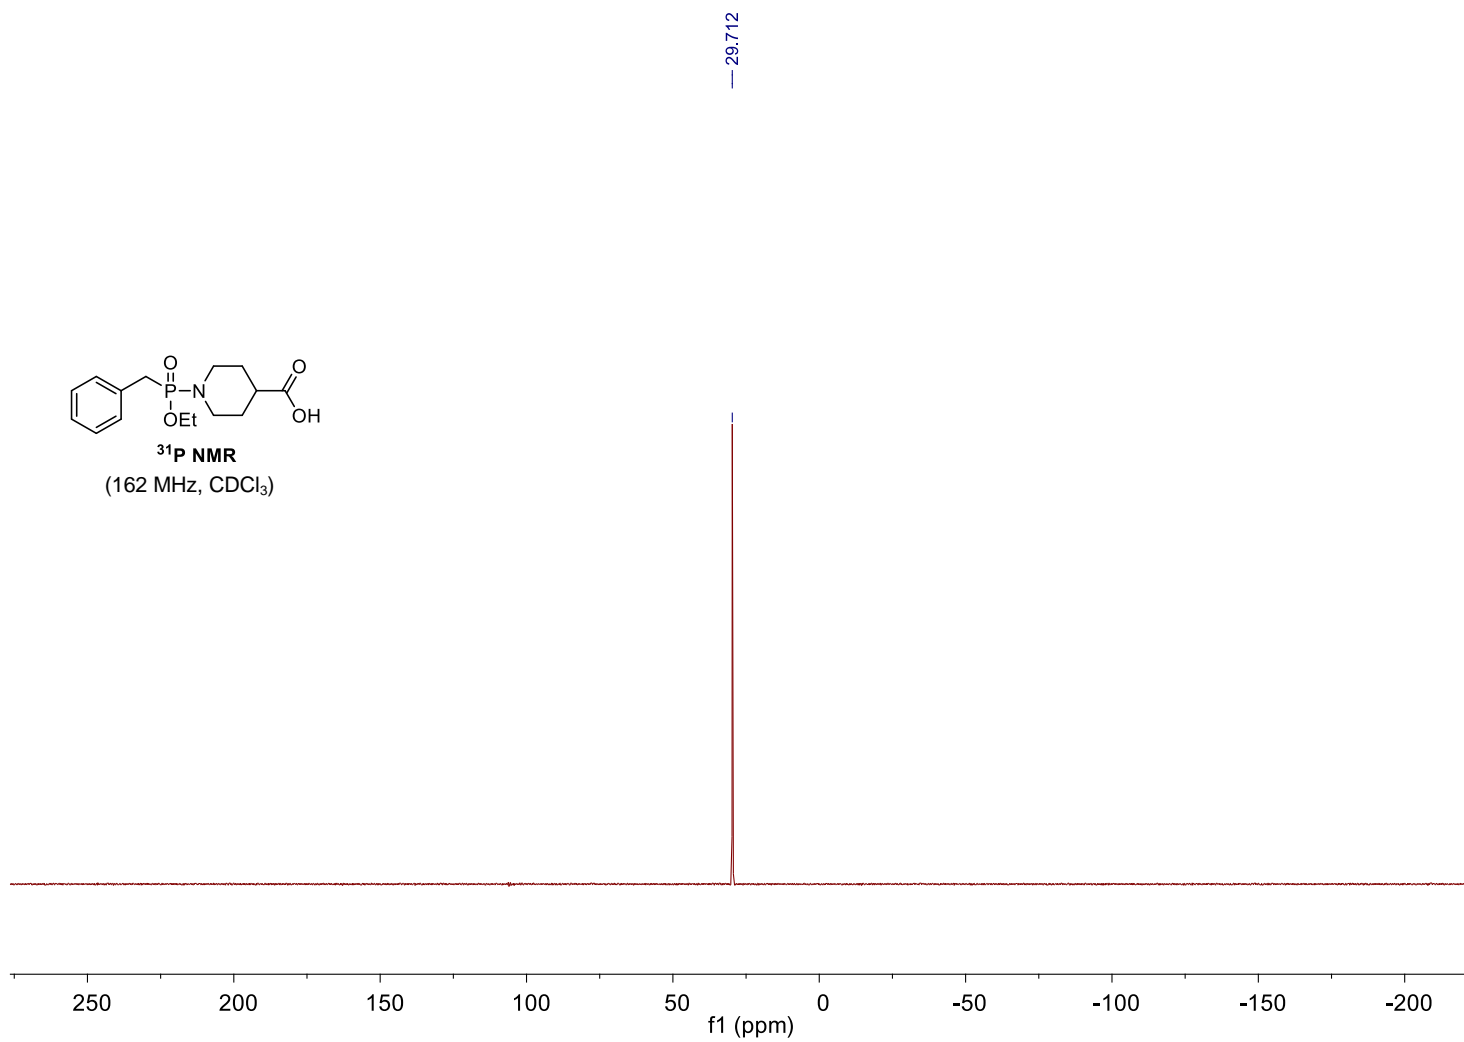

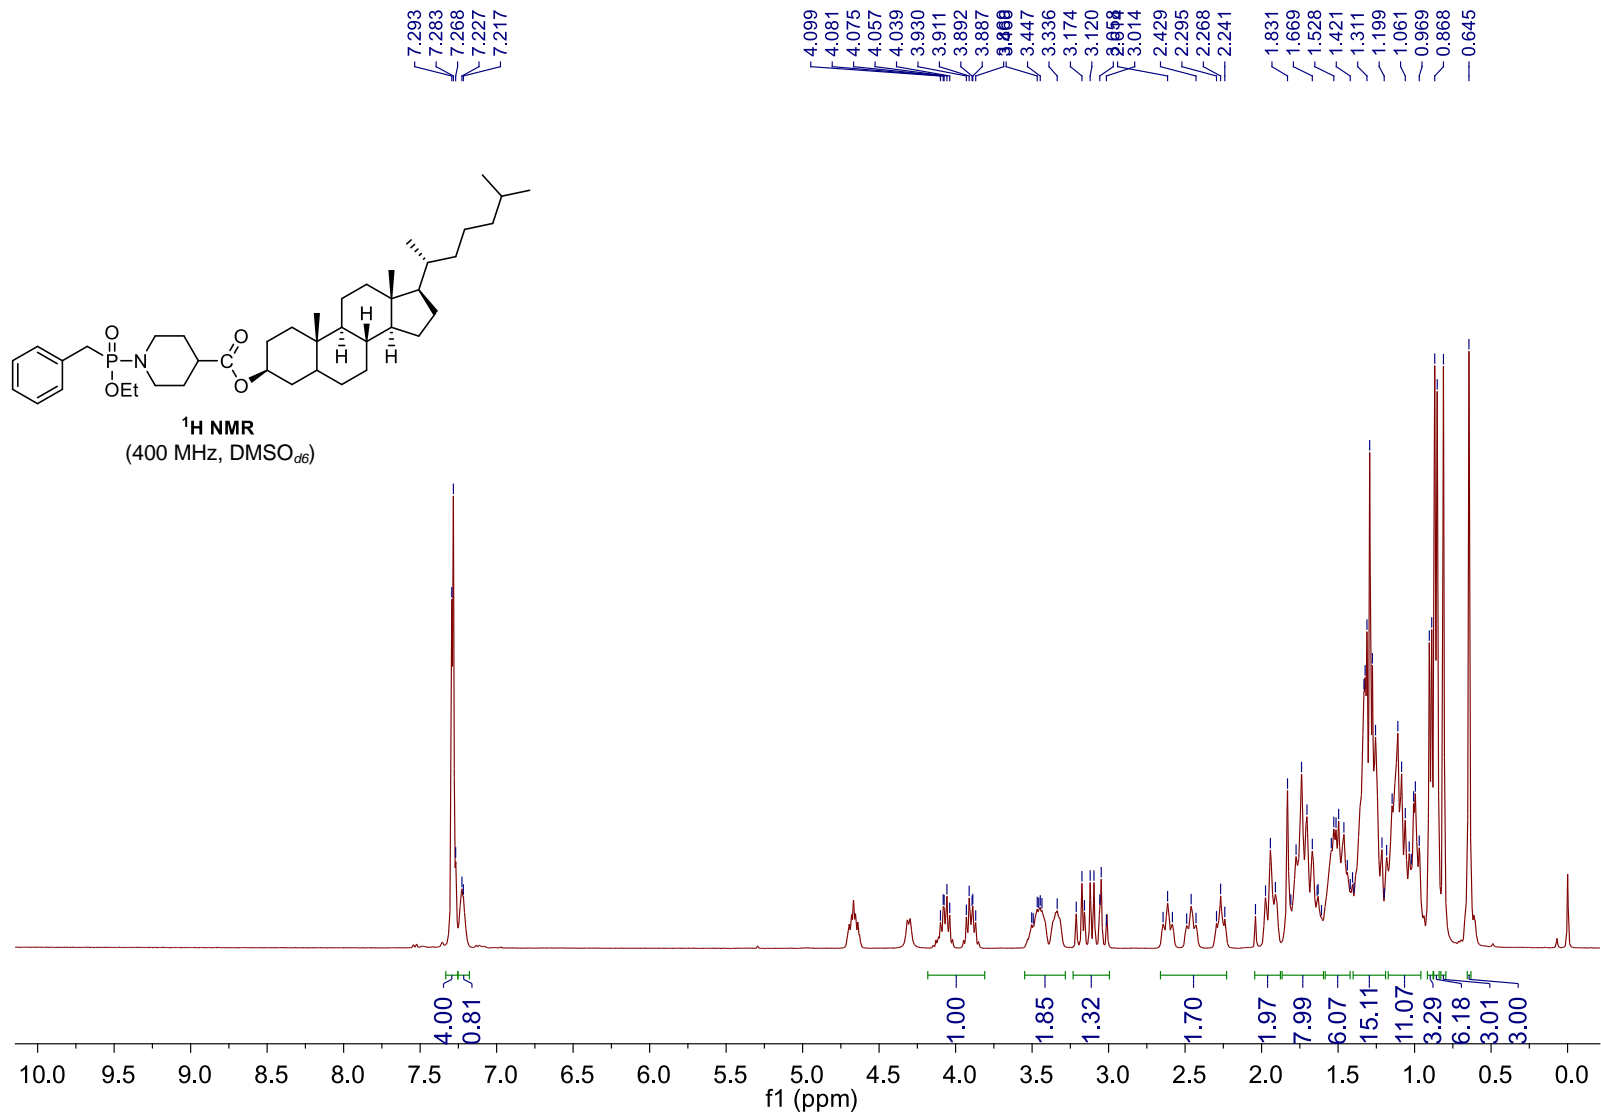

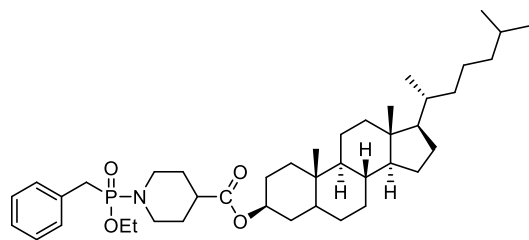

**<sup>13</sup>C NMR**  
(100 MHz, DMSO-*d*<sub>6</sub>)

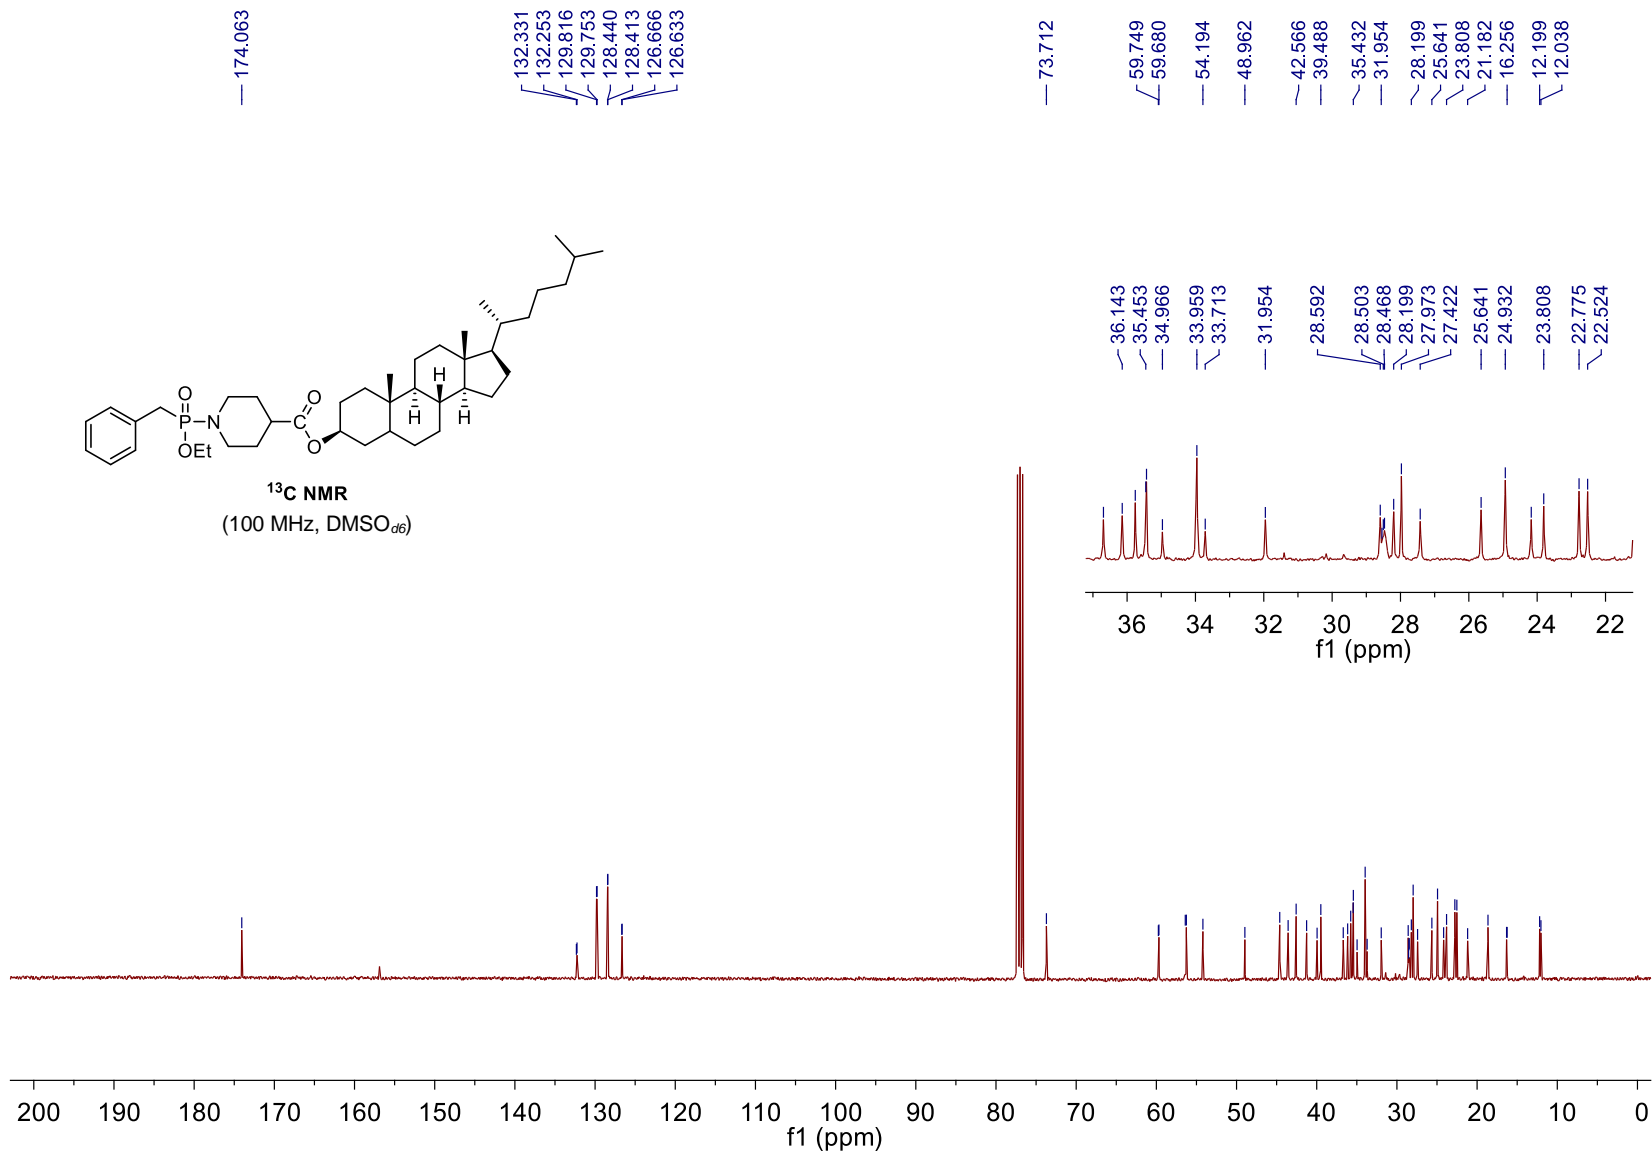

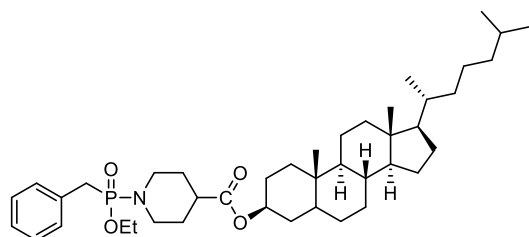

**<sup>31</sup>P NMR**  
(162 MHz, CDCl<sub>3</sub>)

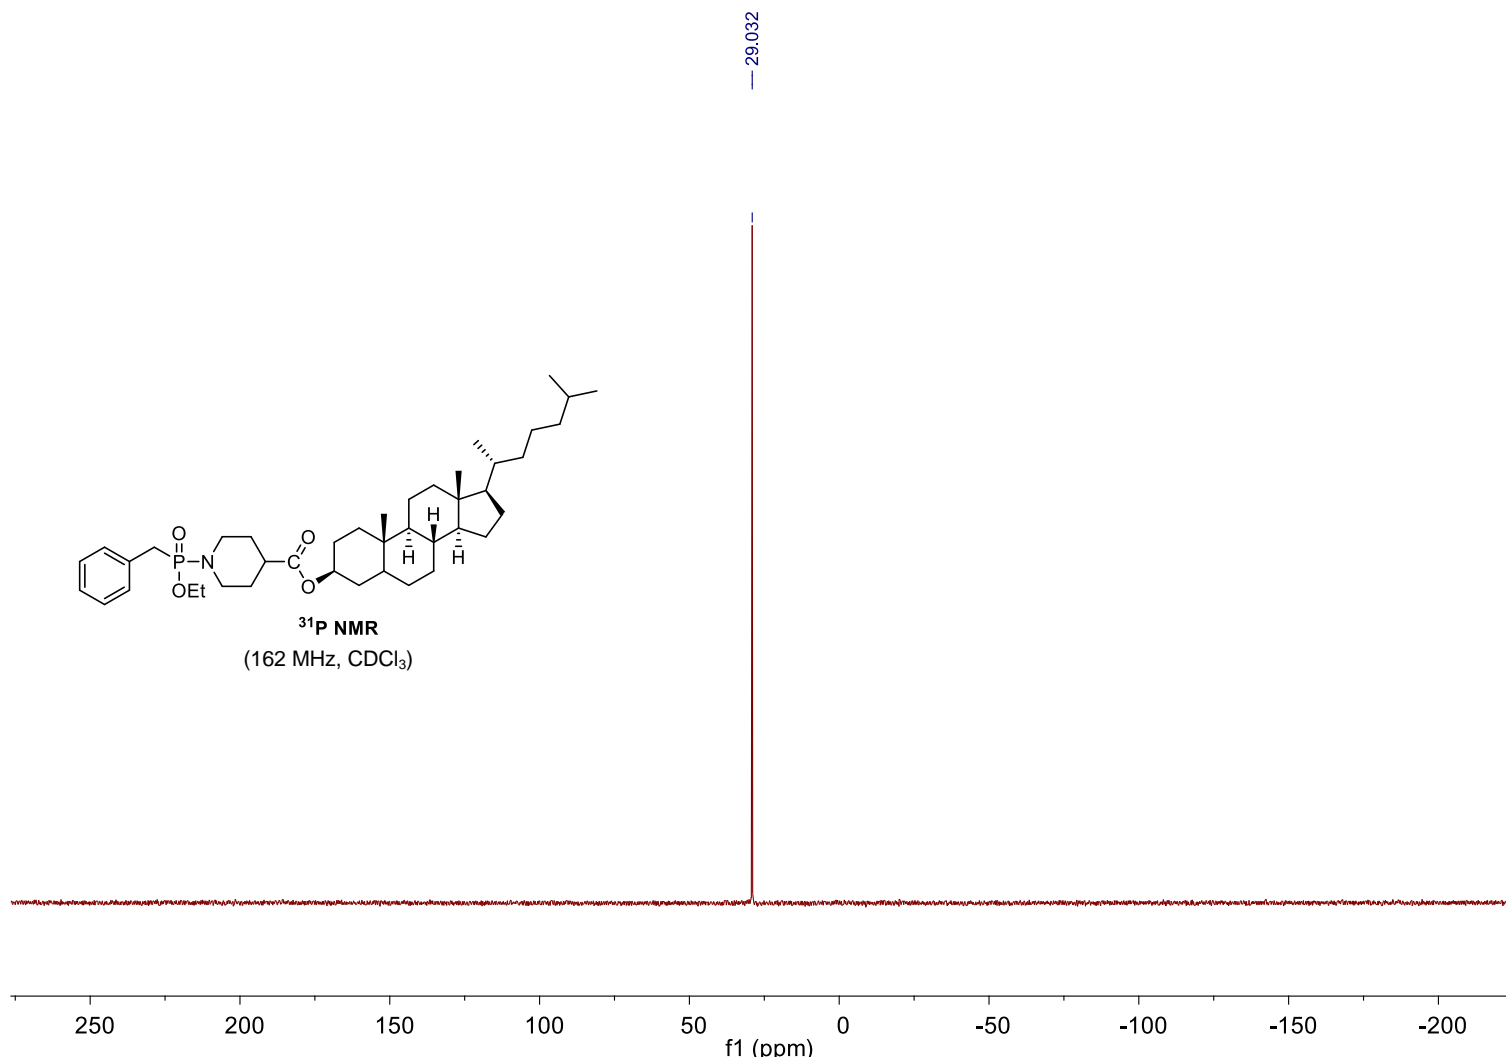



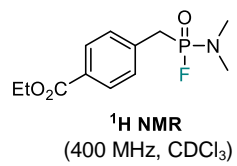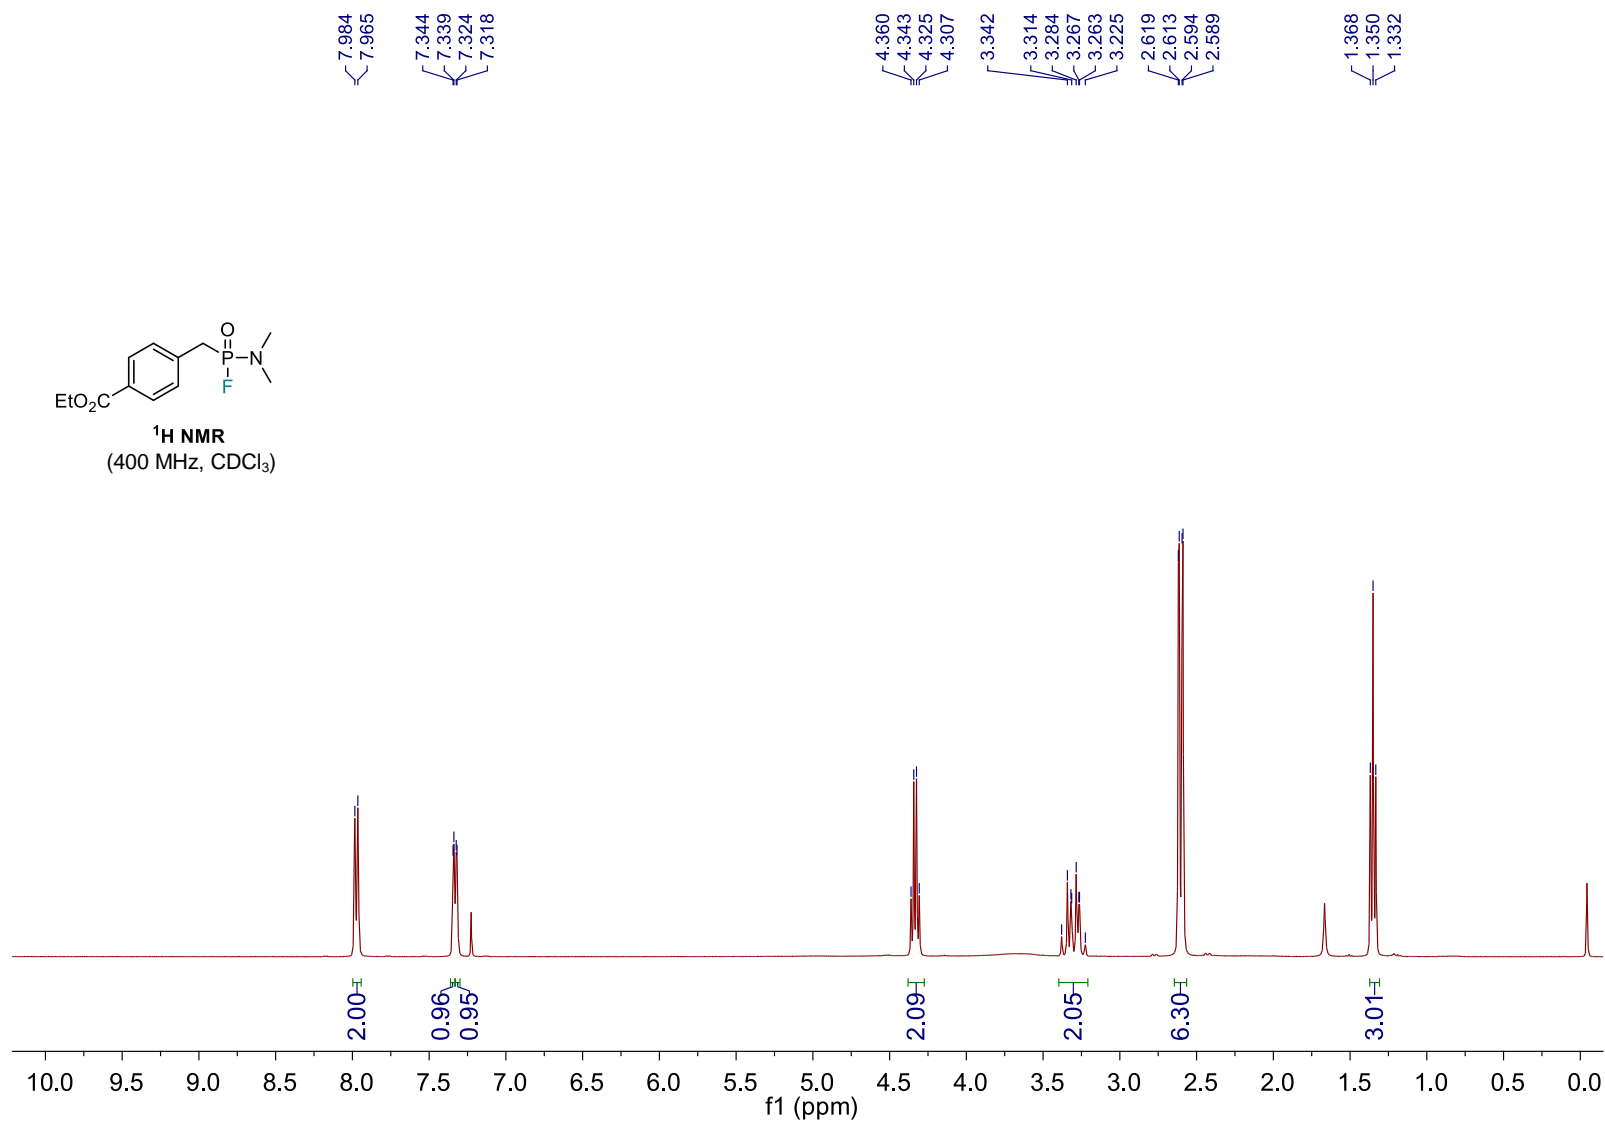

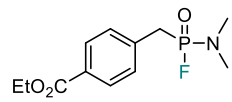

<sup>13</sup>C NMR  
(100 MHz, CDCl<sub>3</sub>)

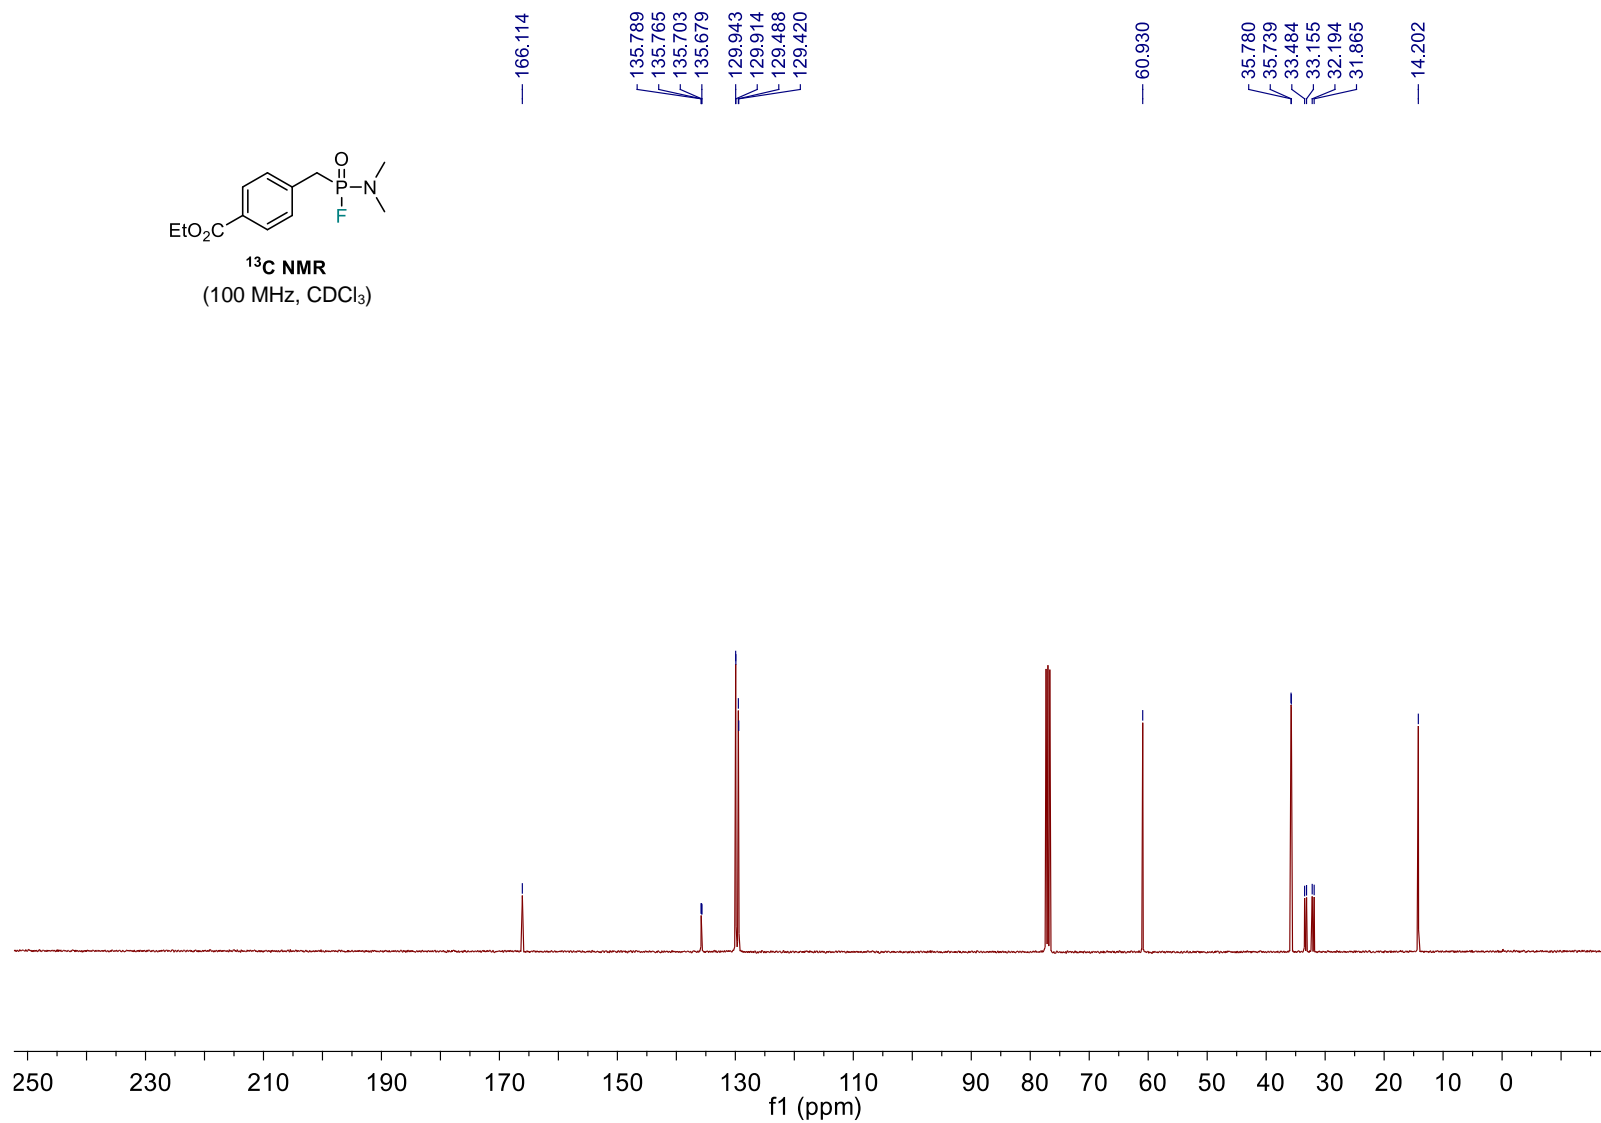

S234

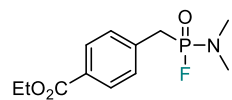

<sup>31</sup>P NMR  
(162 MHz, CDCl<sub>3</sub>)

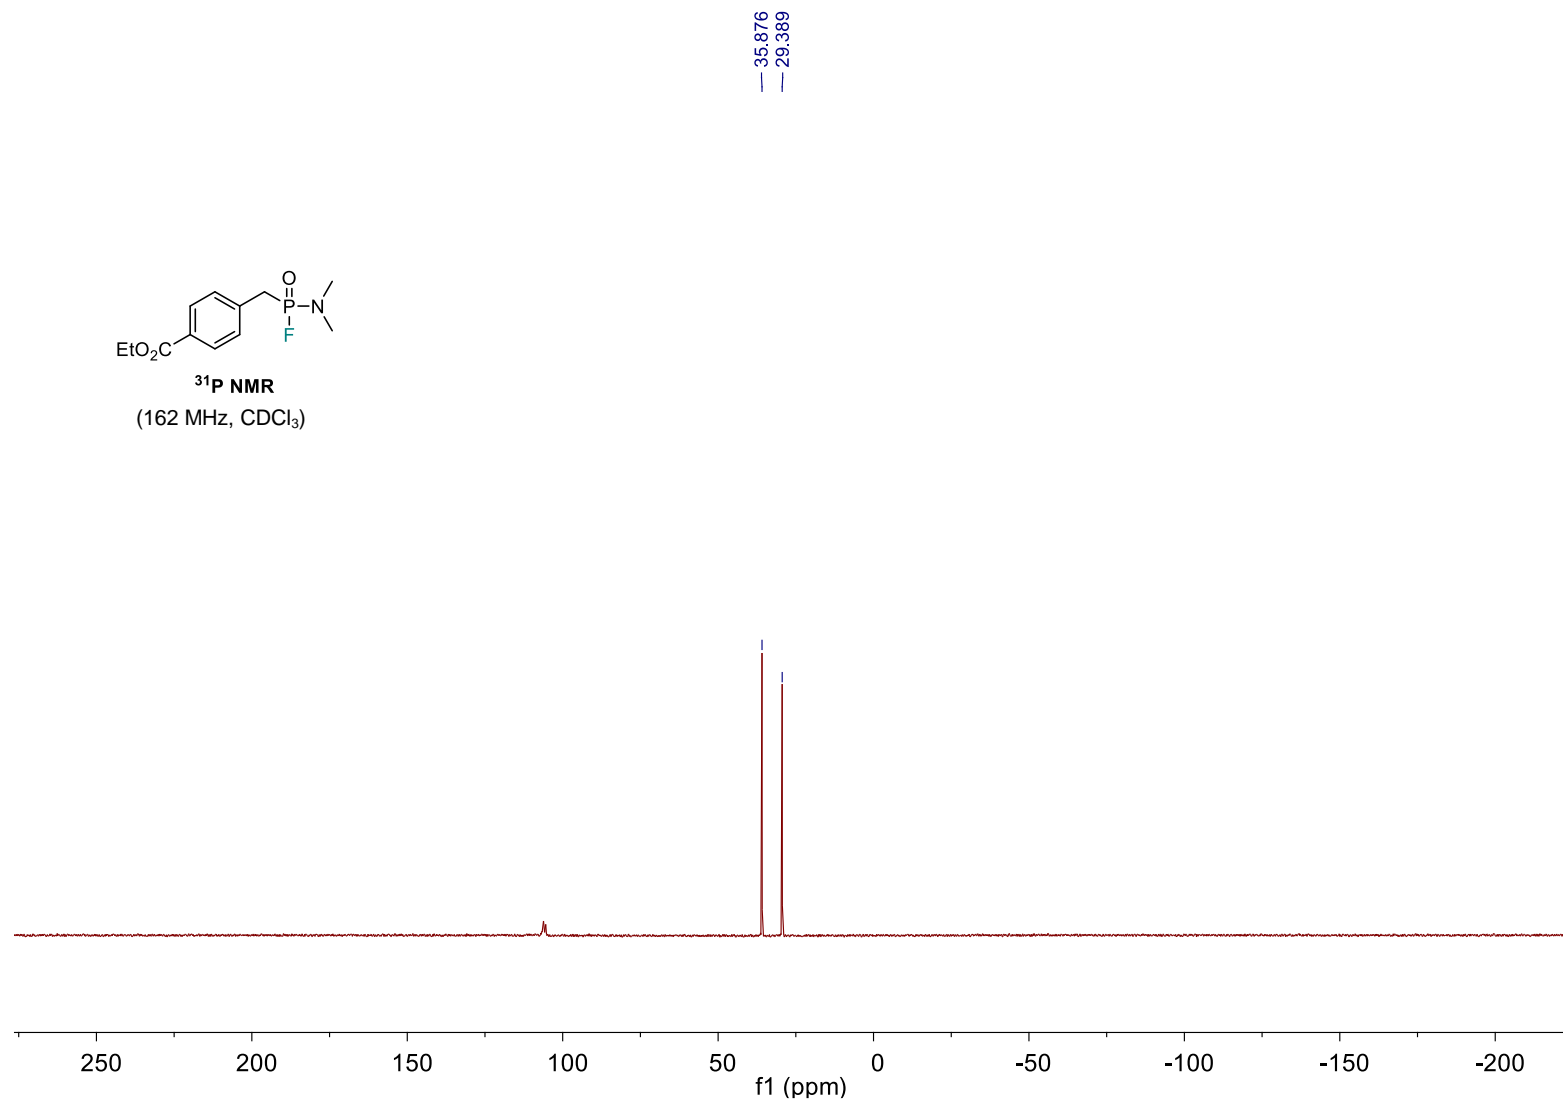

S235

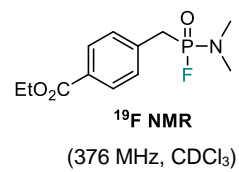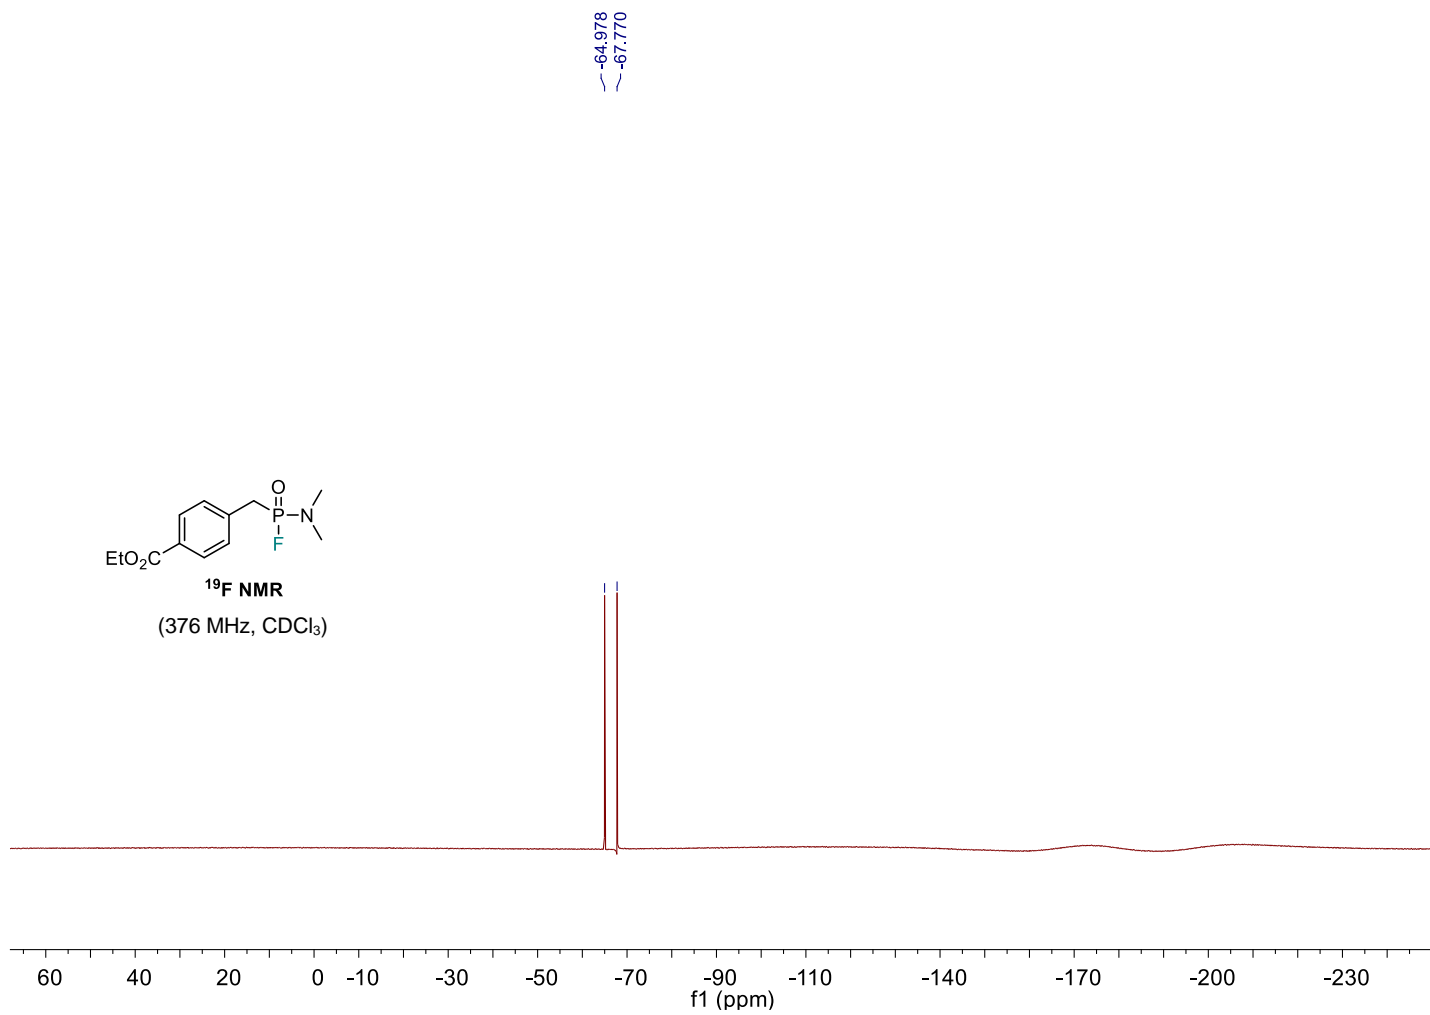

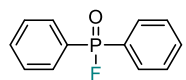

<sup>1</sup>H NMR  
(400 MHz, CDCl<sub>3</sub>)

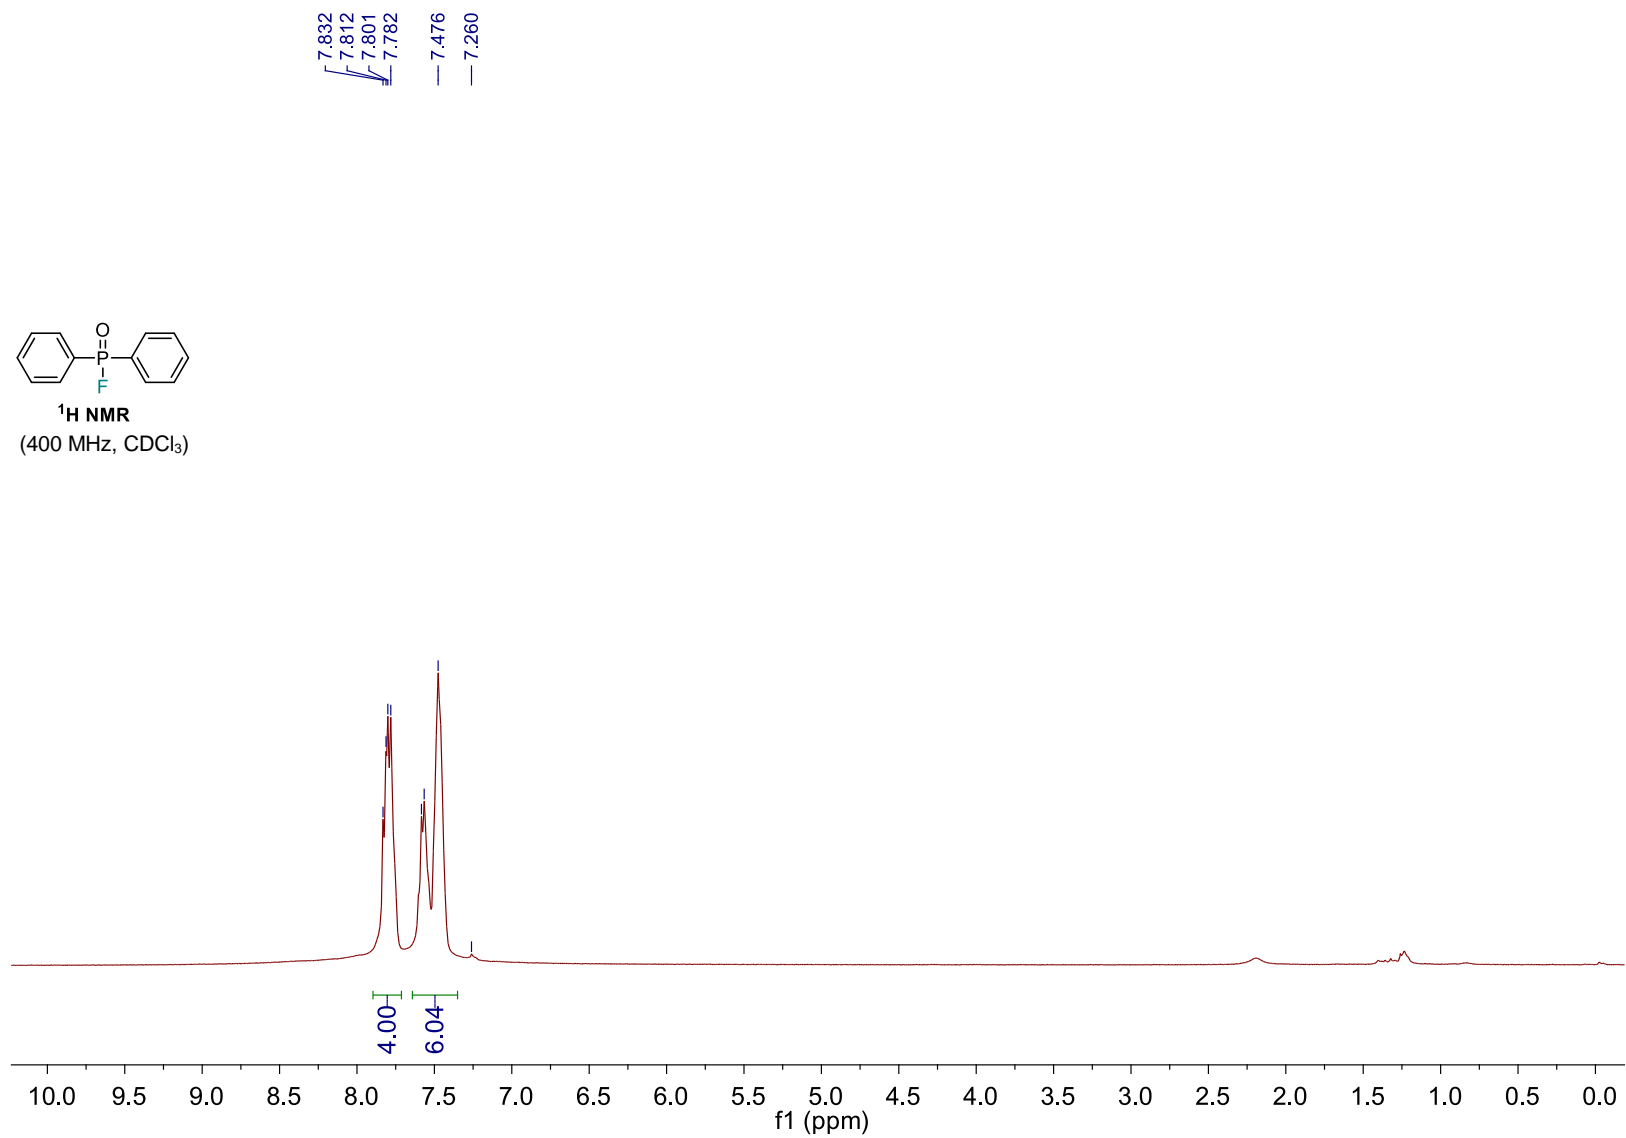

S237

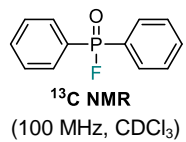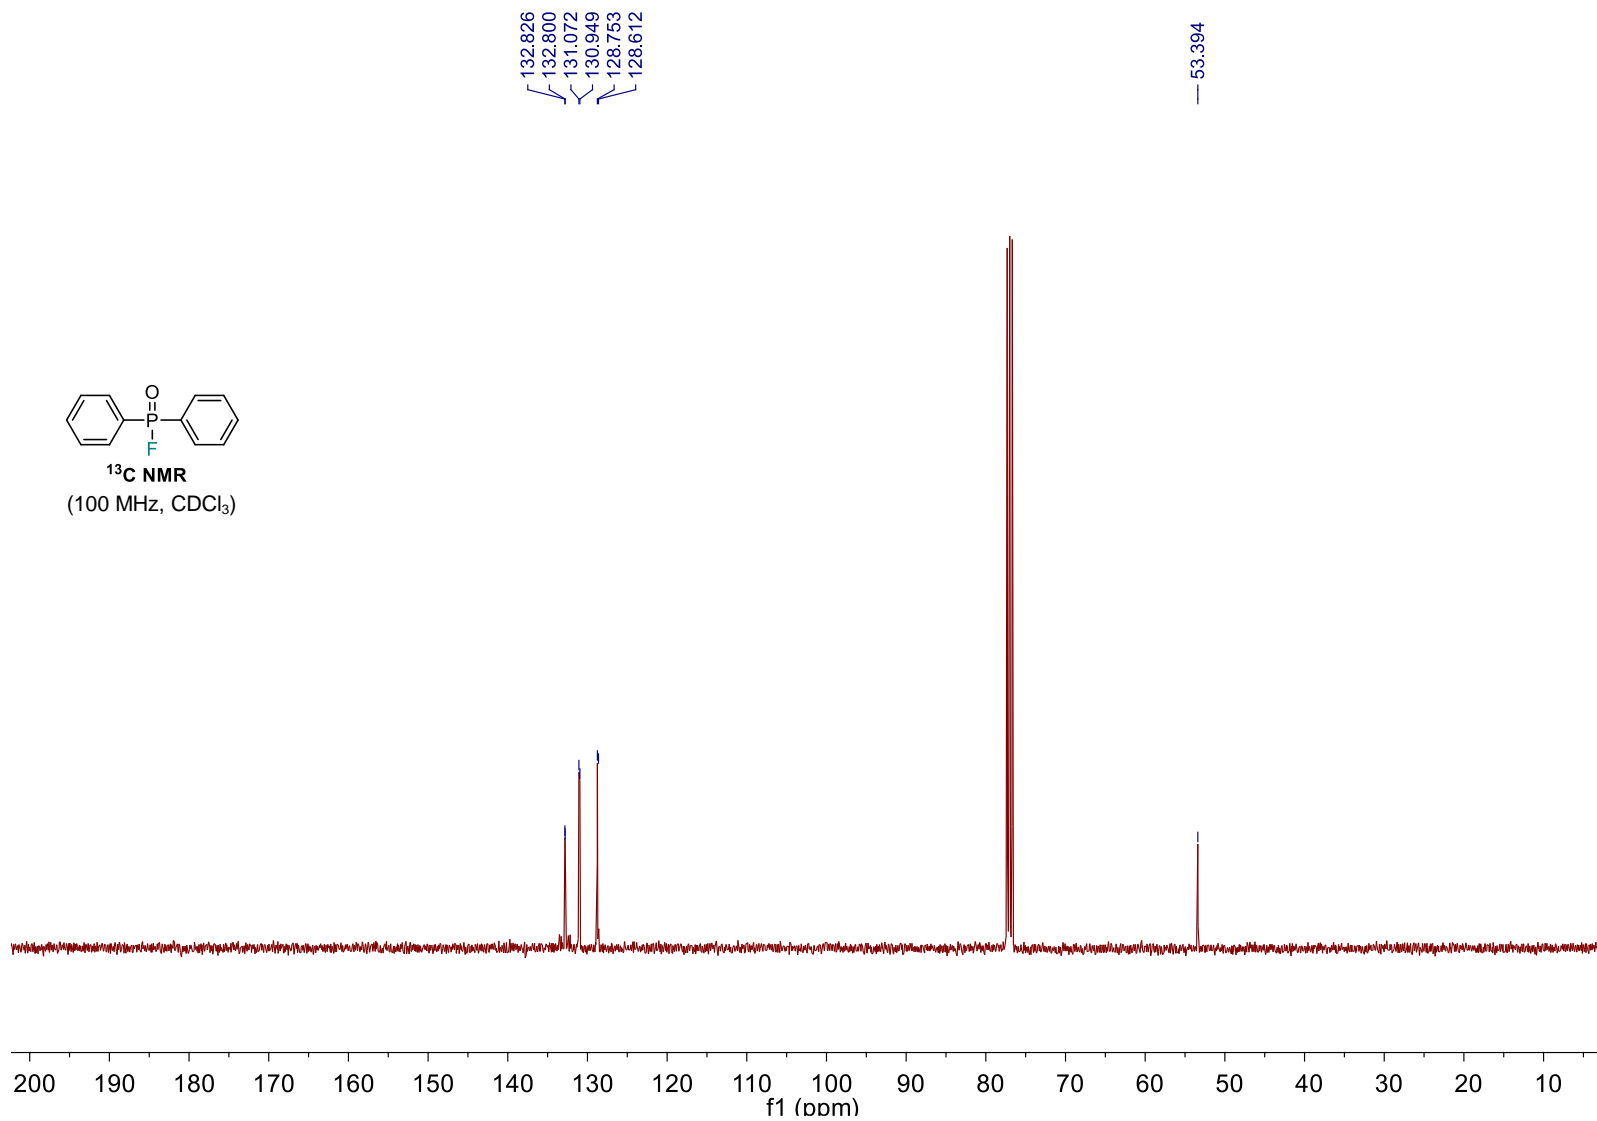

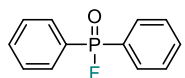

**<sup>31</sup>P NMR**  
(162 MHz, CDCl<sub>3</sub>)

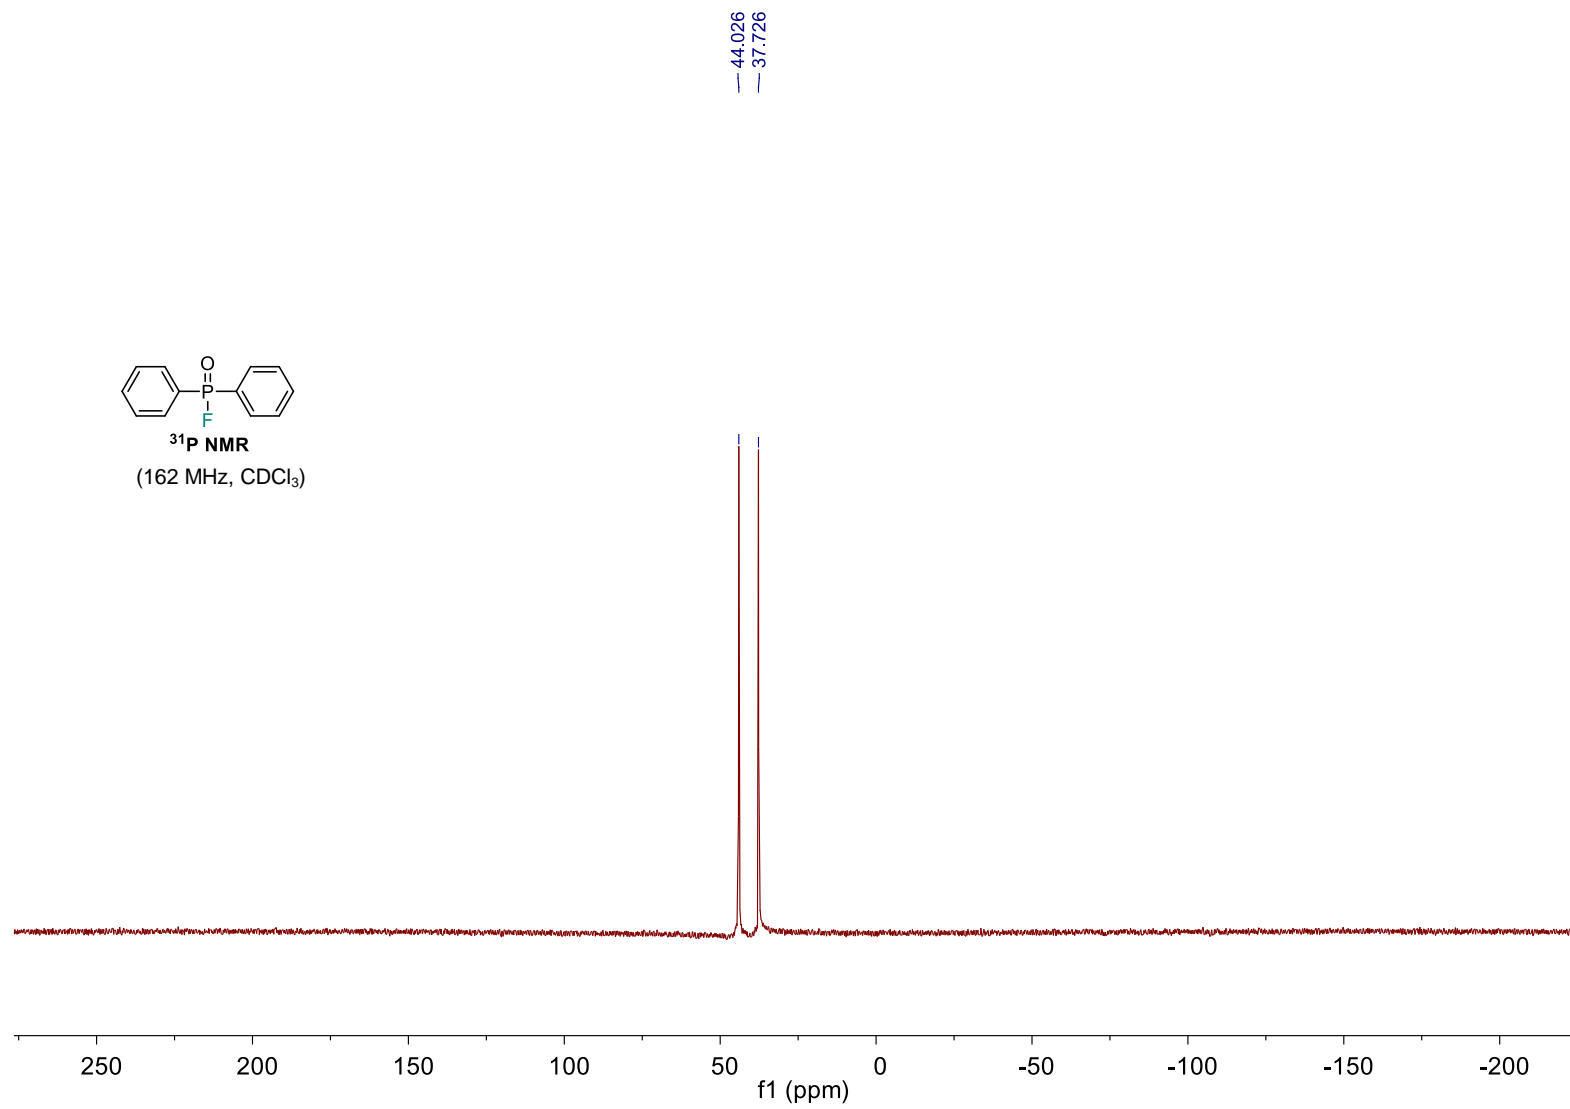

S239

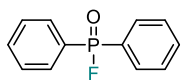

**<sup>19</sup>F NMR**  
(376 MHz, CDCl<sub>3</sub>)

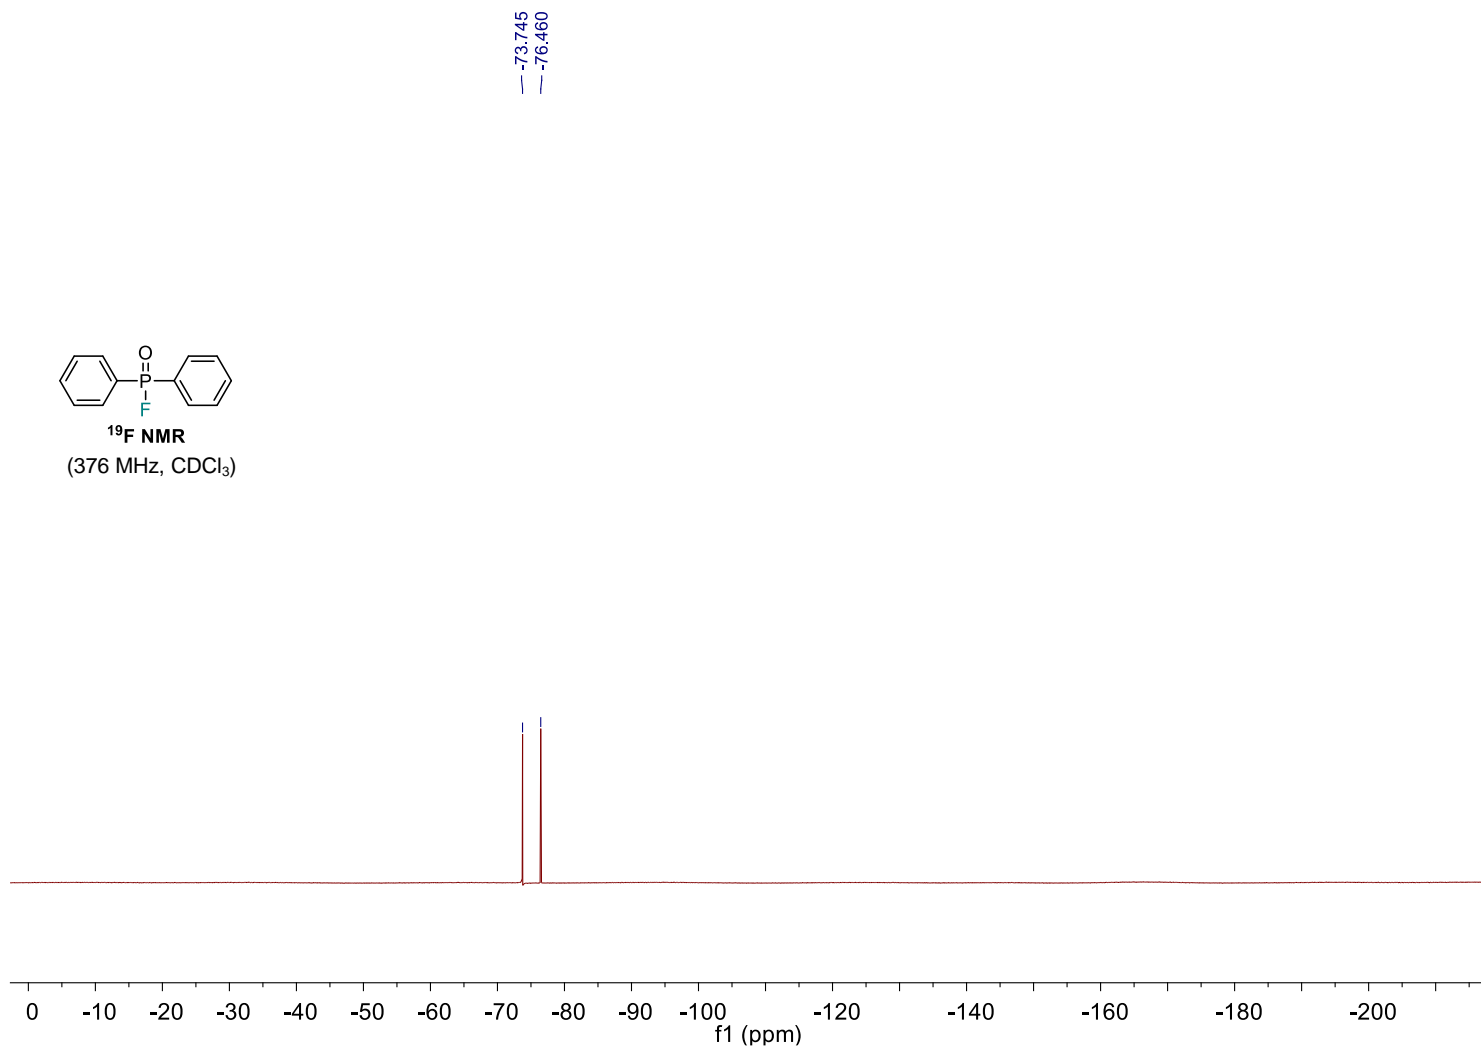



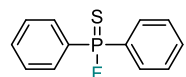

<sup>1</sup>H NMR  
(400 MHz, CDCl<sub>3</sub>)

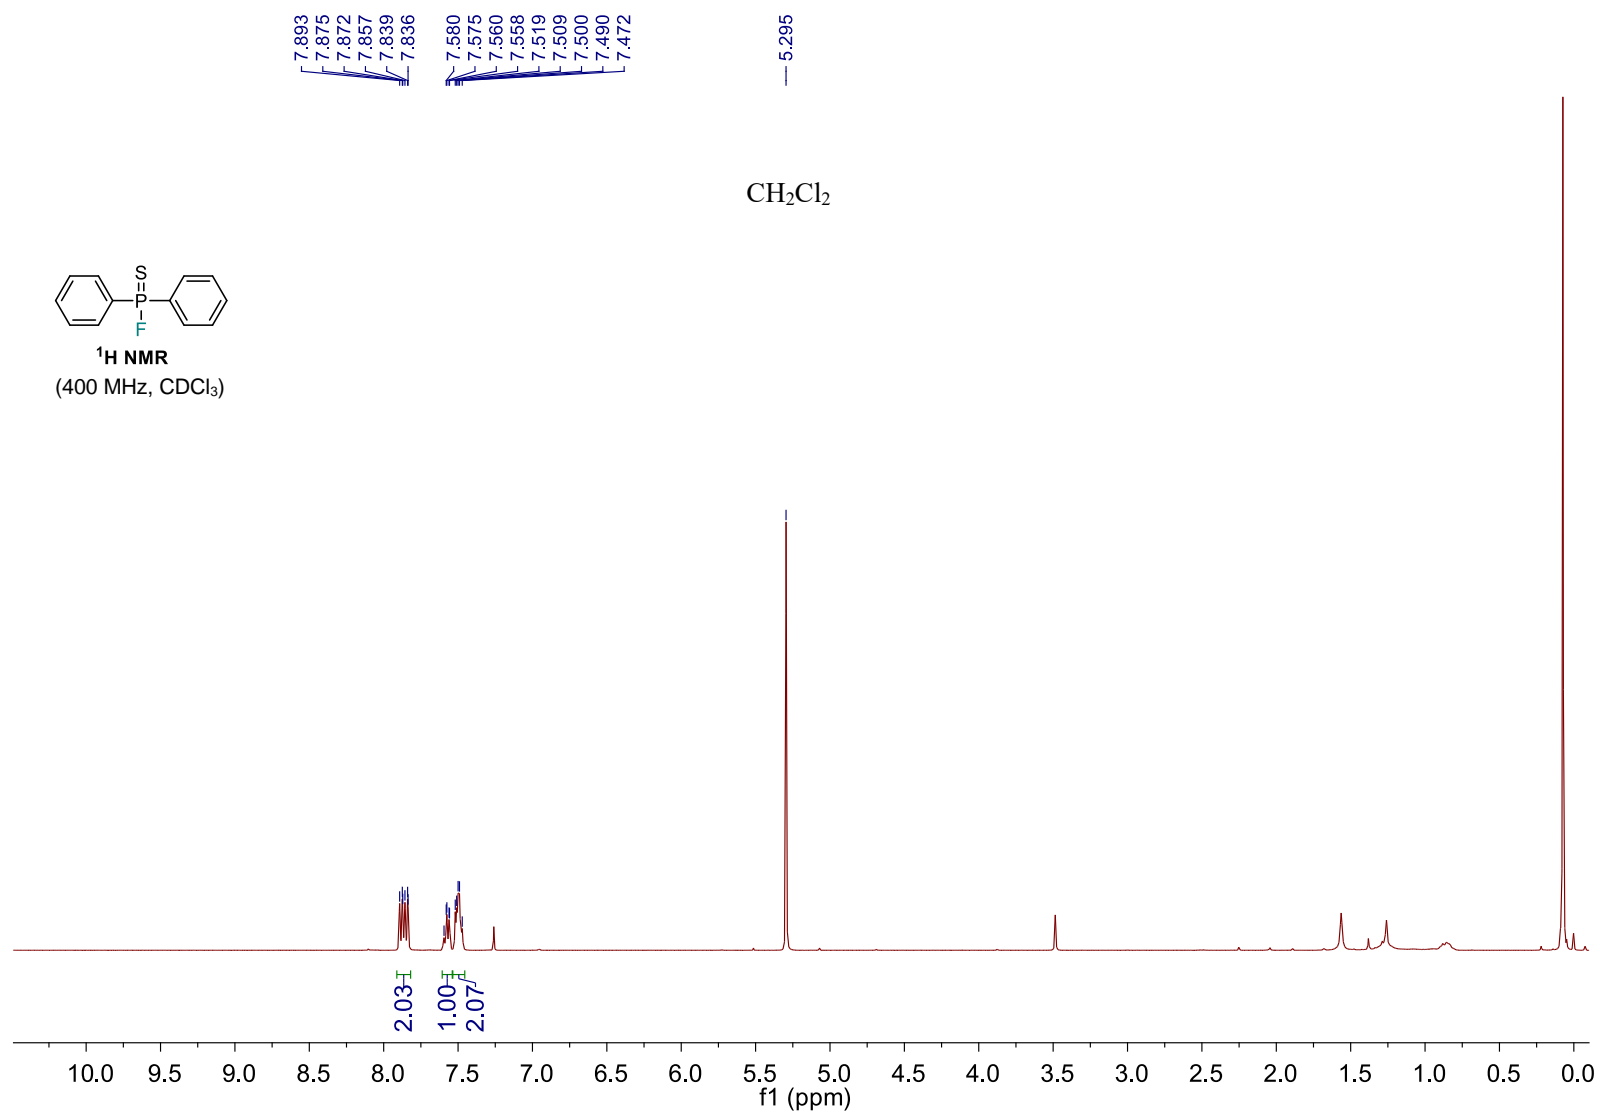

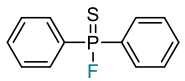

**<sup>13</sup>C NMR**  
(100 MHz, CDCl<sub>3</sub>)

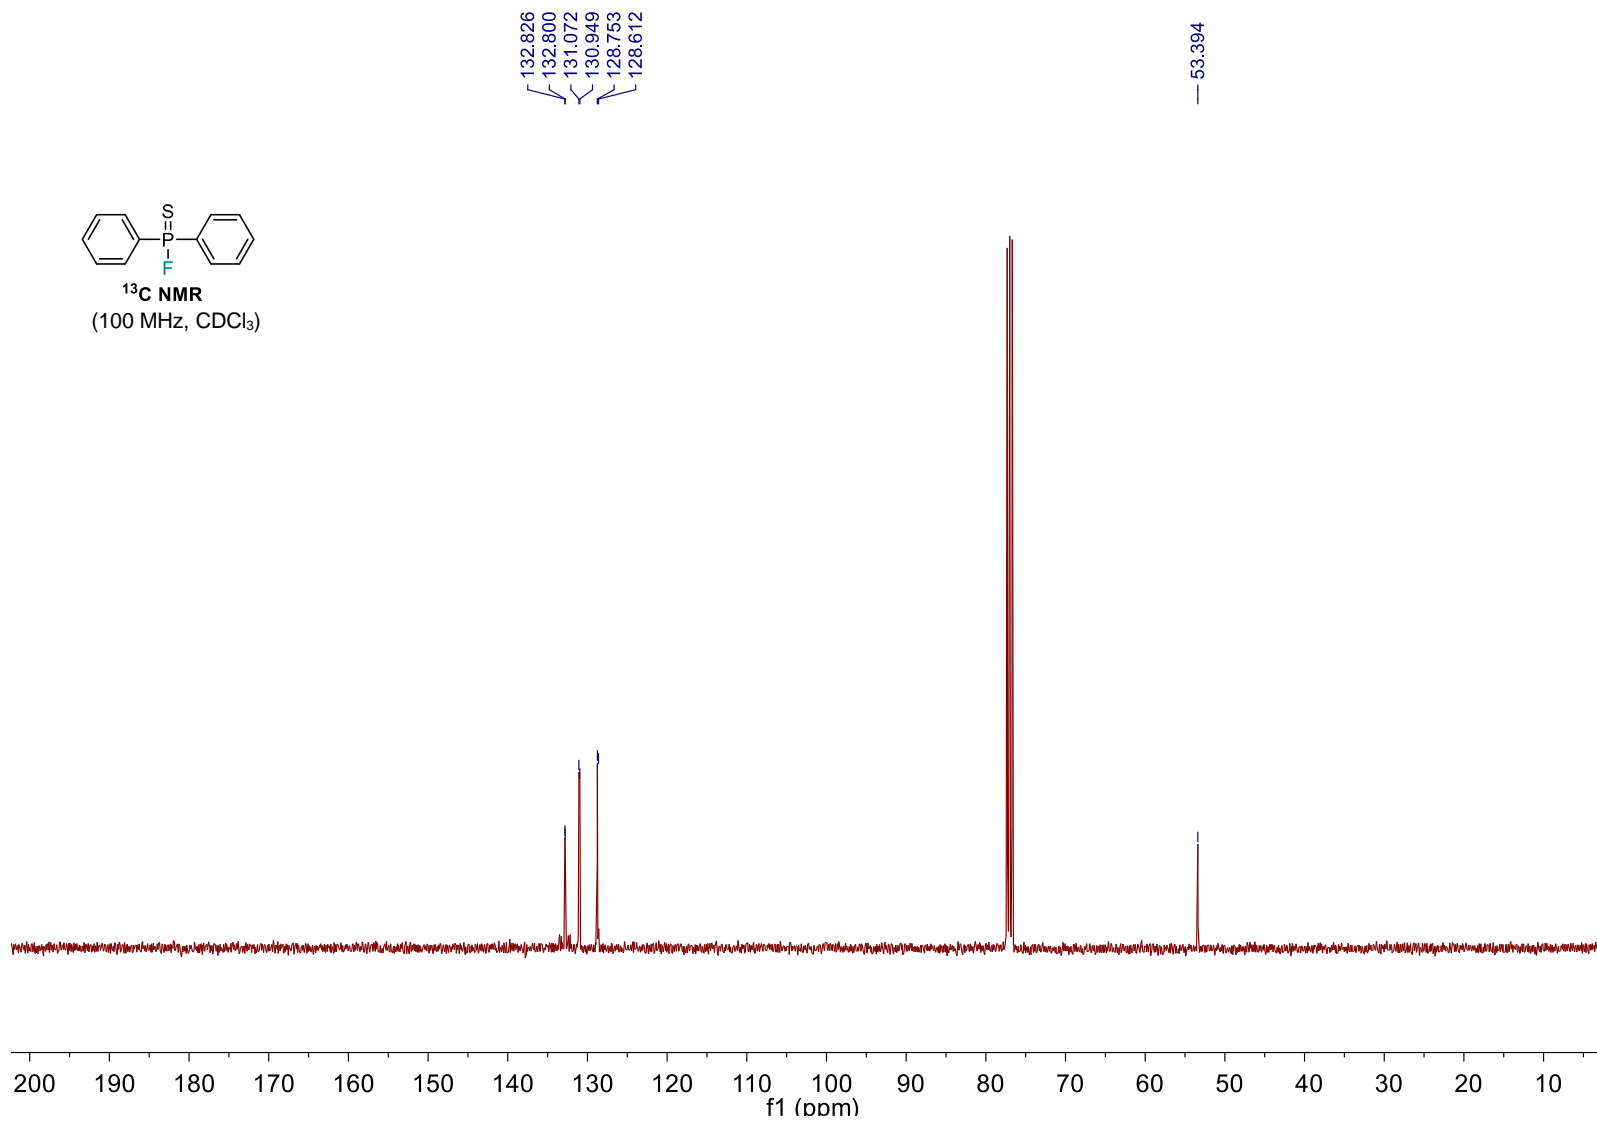

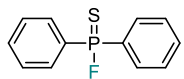

<sup>31</sup>P NMR  
(162 MHz, CDCl<sub>3</sub>)

105.321  
99.010

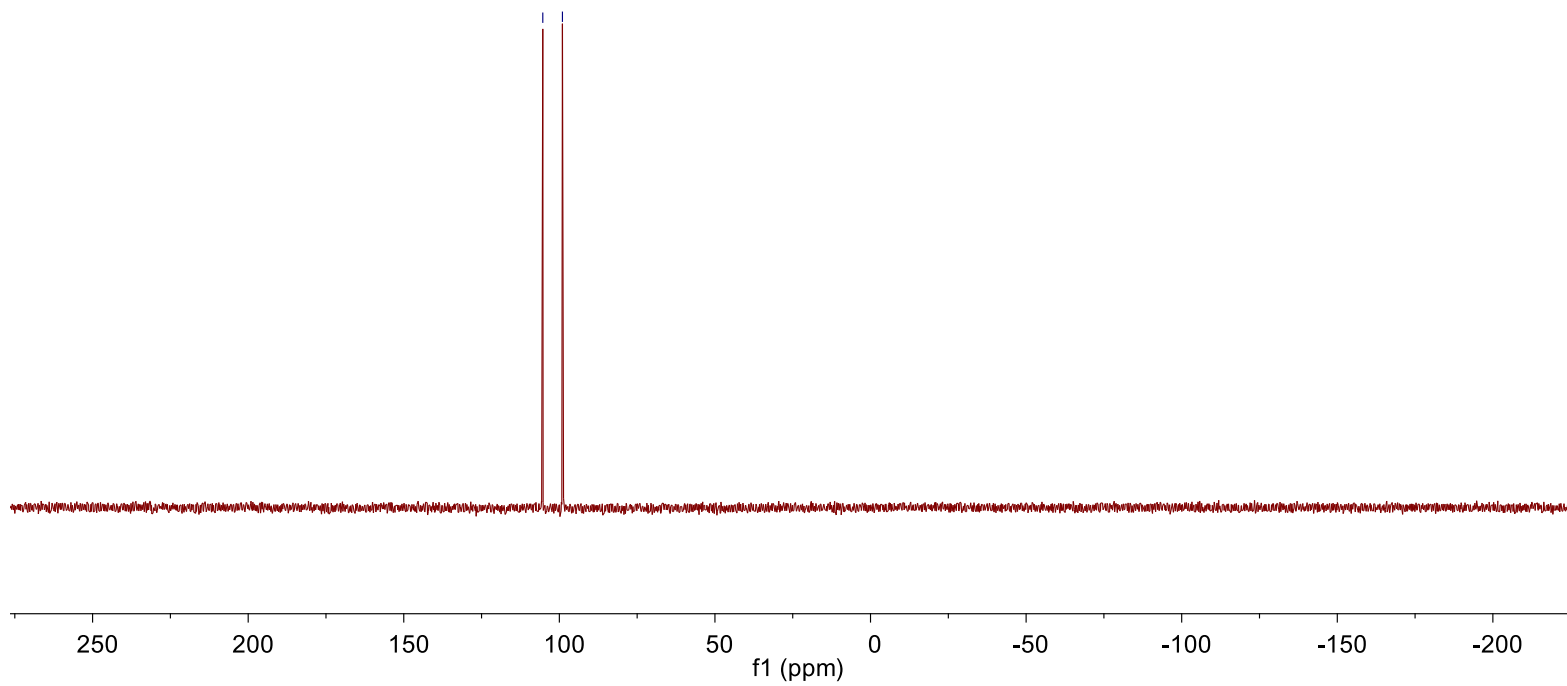

S243

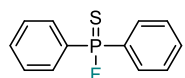

<sup>19</sup>F NMR

(376 MHz, CDCl<sub>3</sub>)

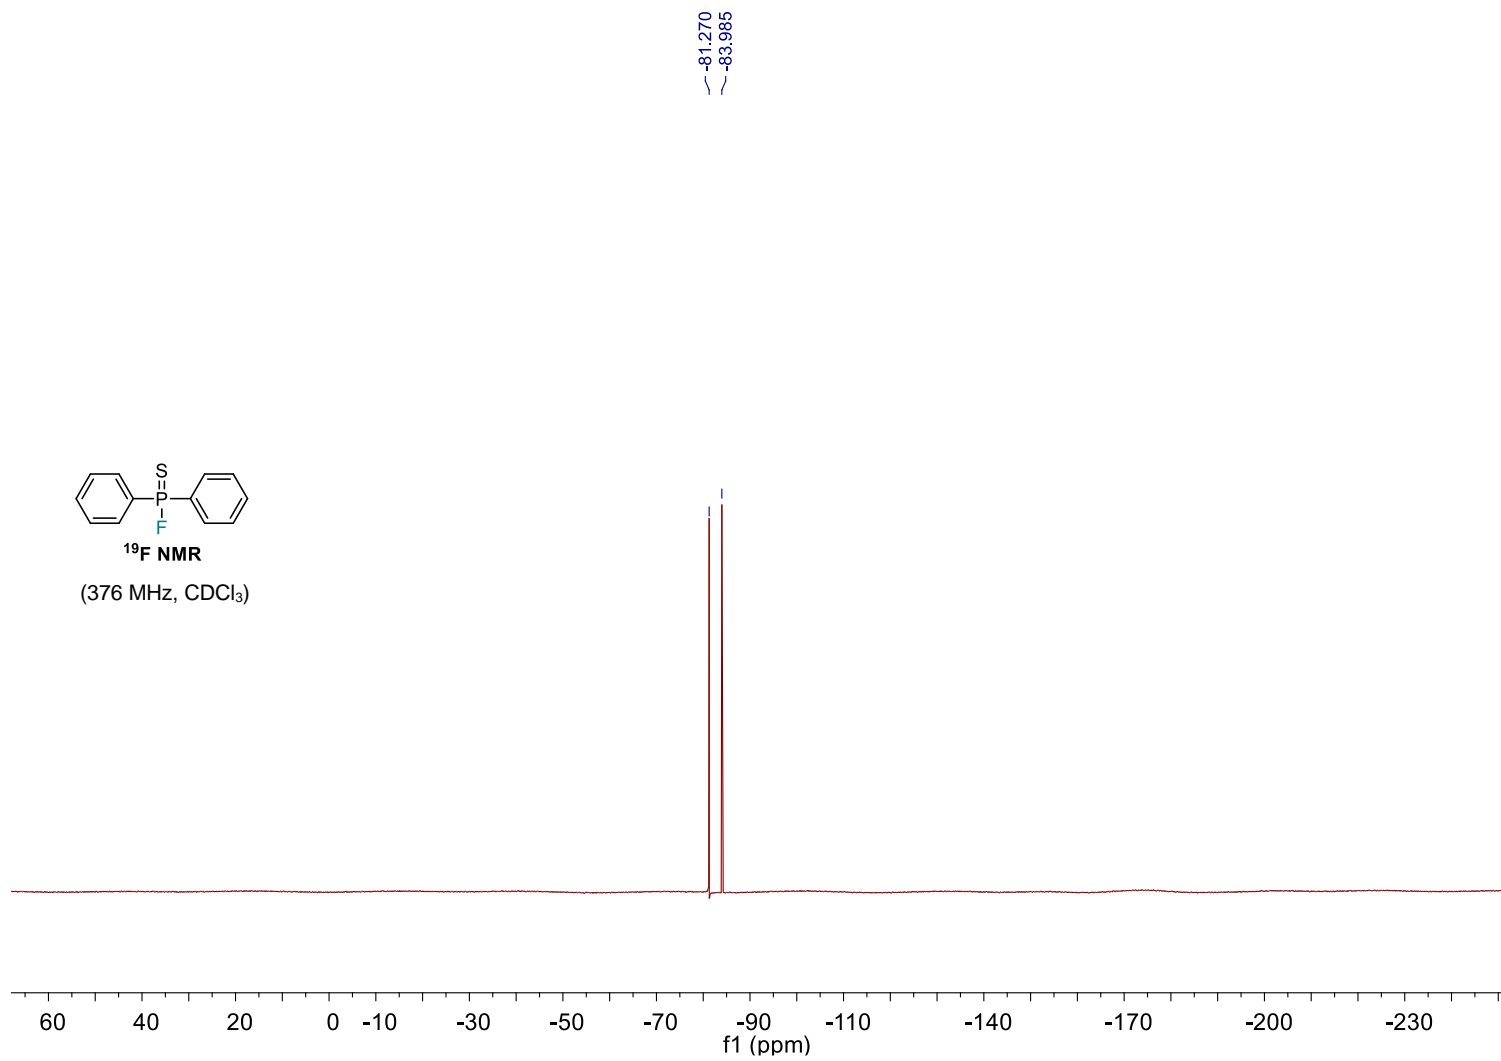

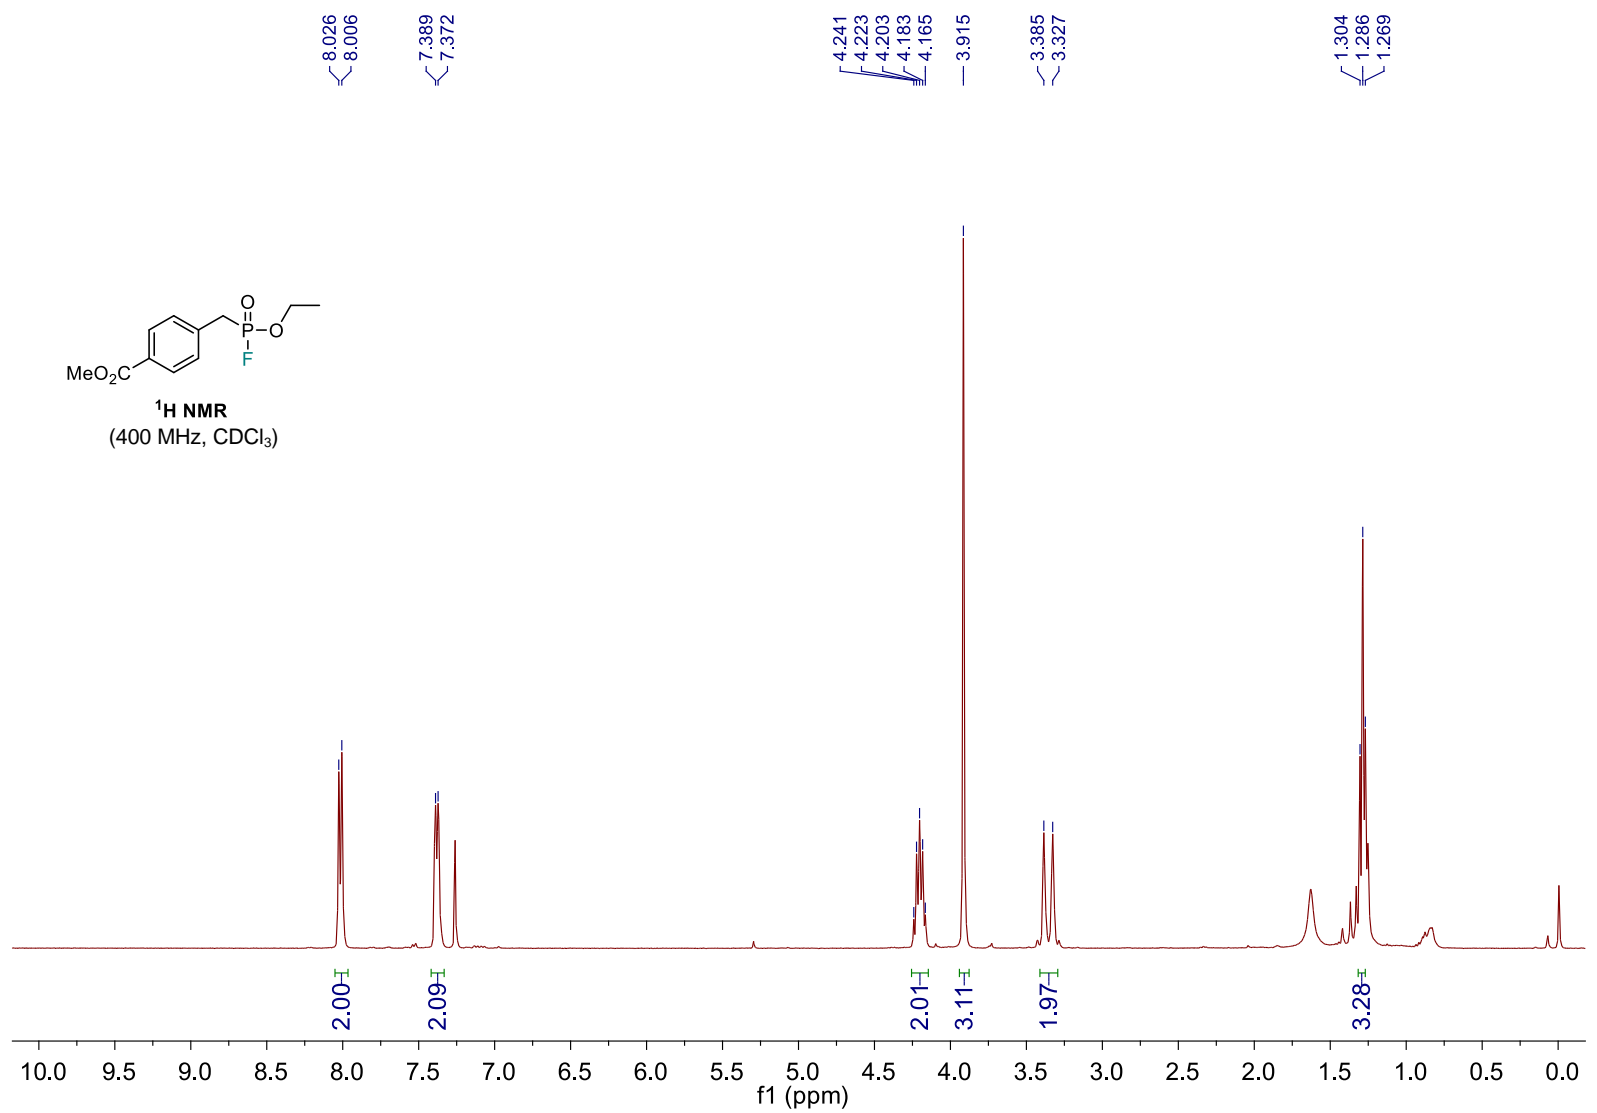

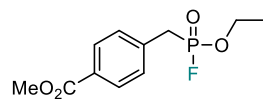

**<sup>13</sup>C NMR**  
(100 MHz, CDCl<sub>3</sub>)

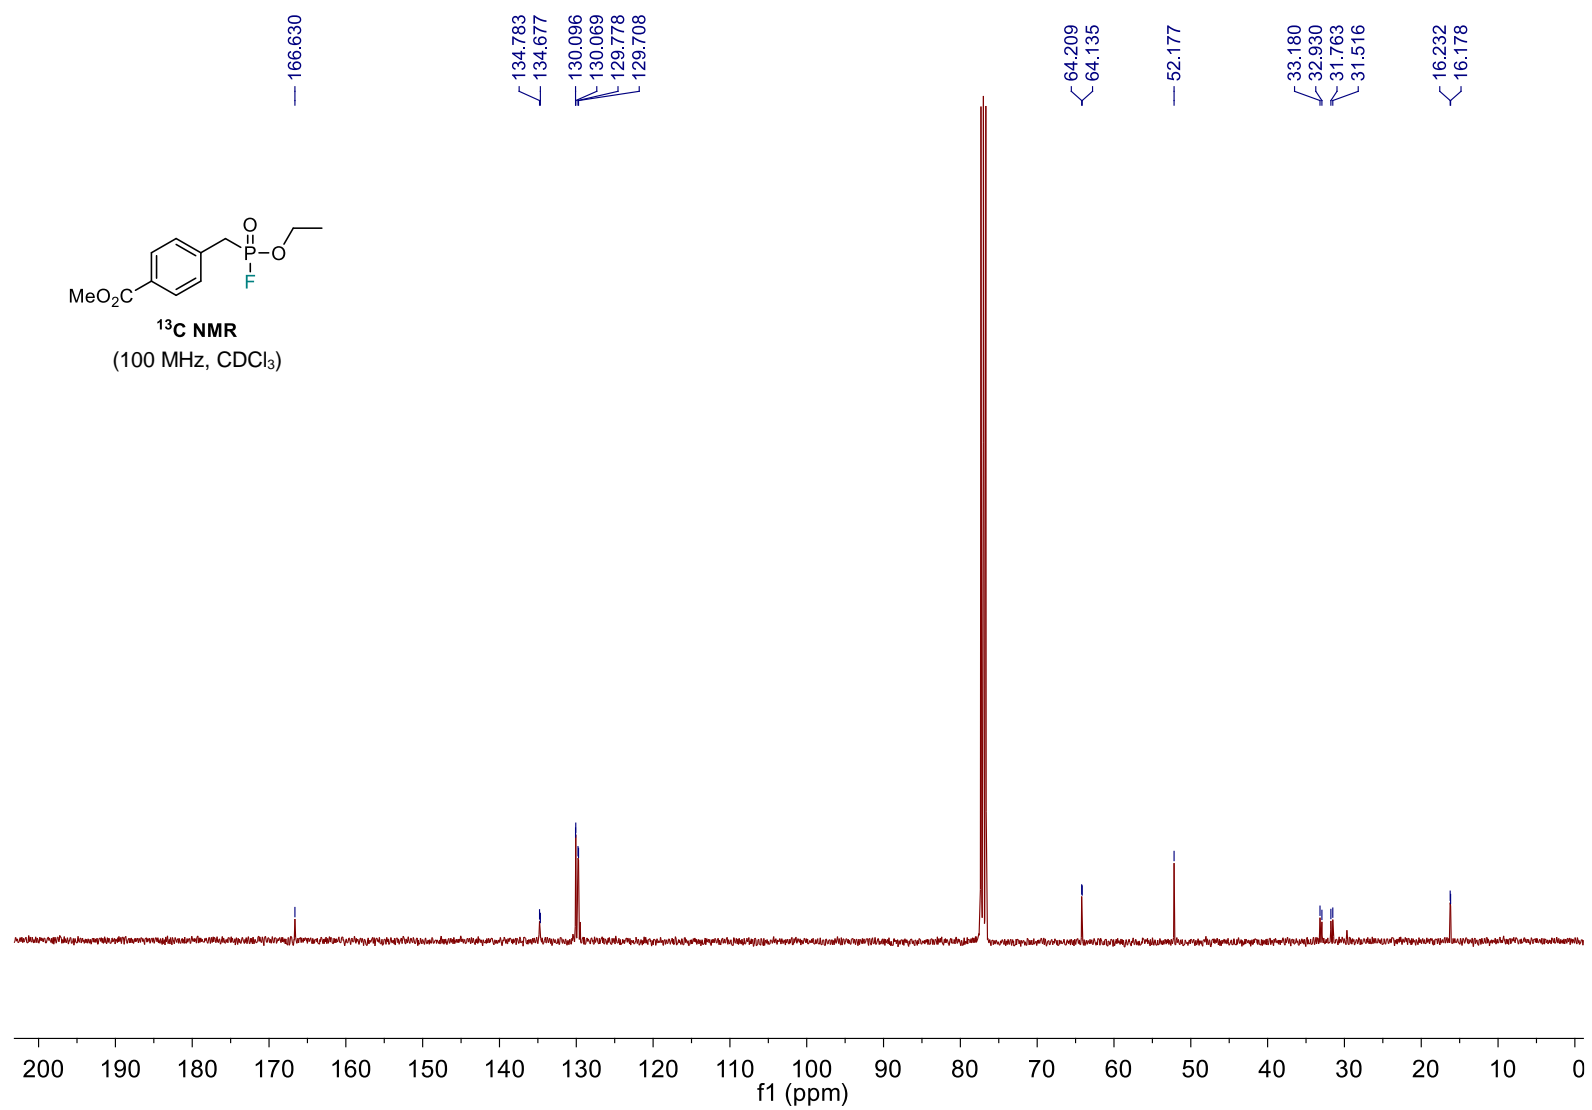

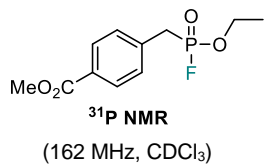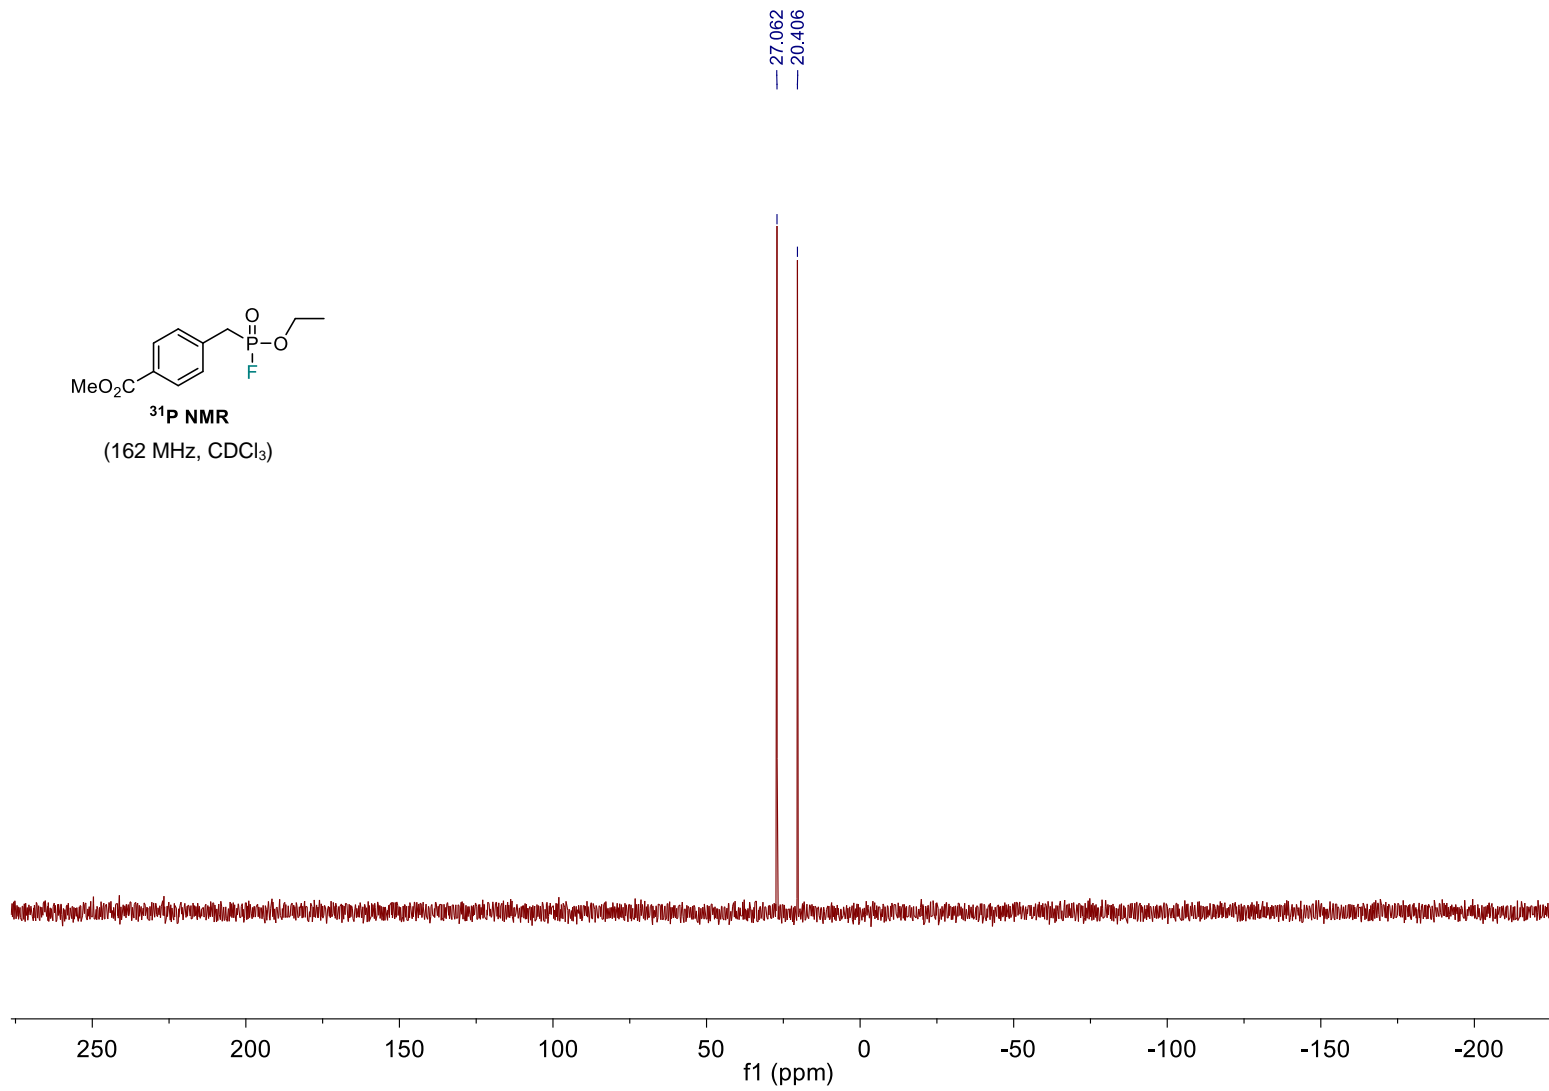

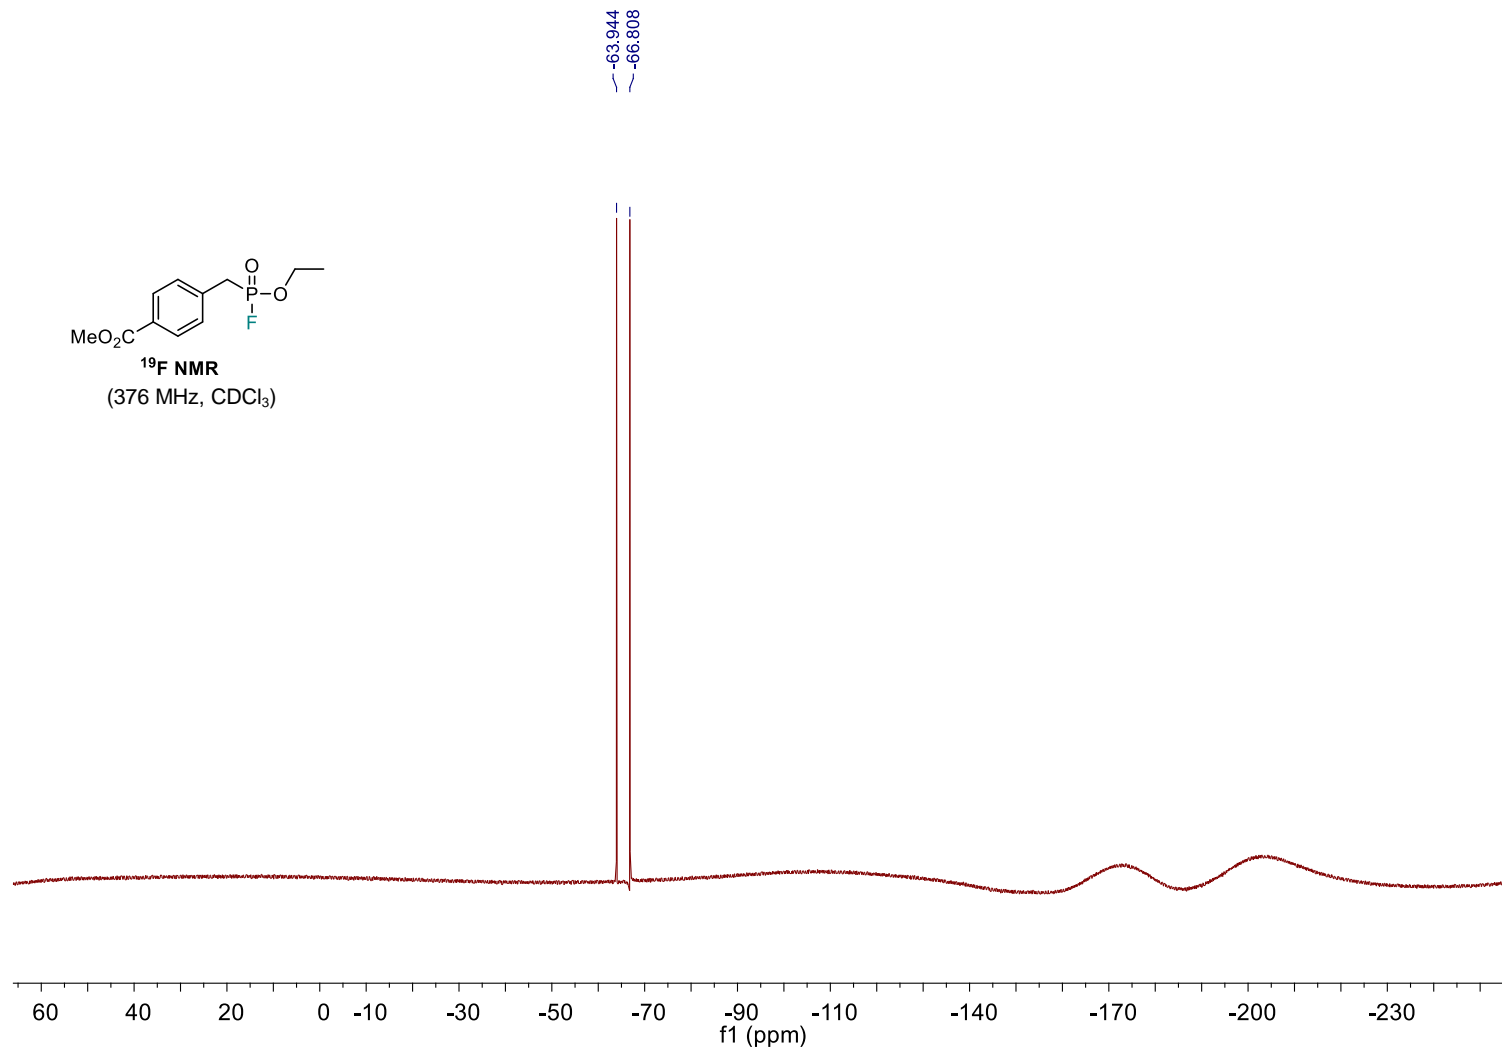



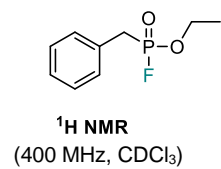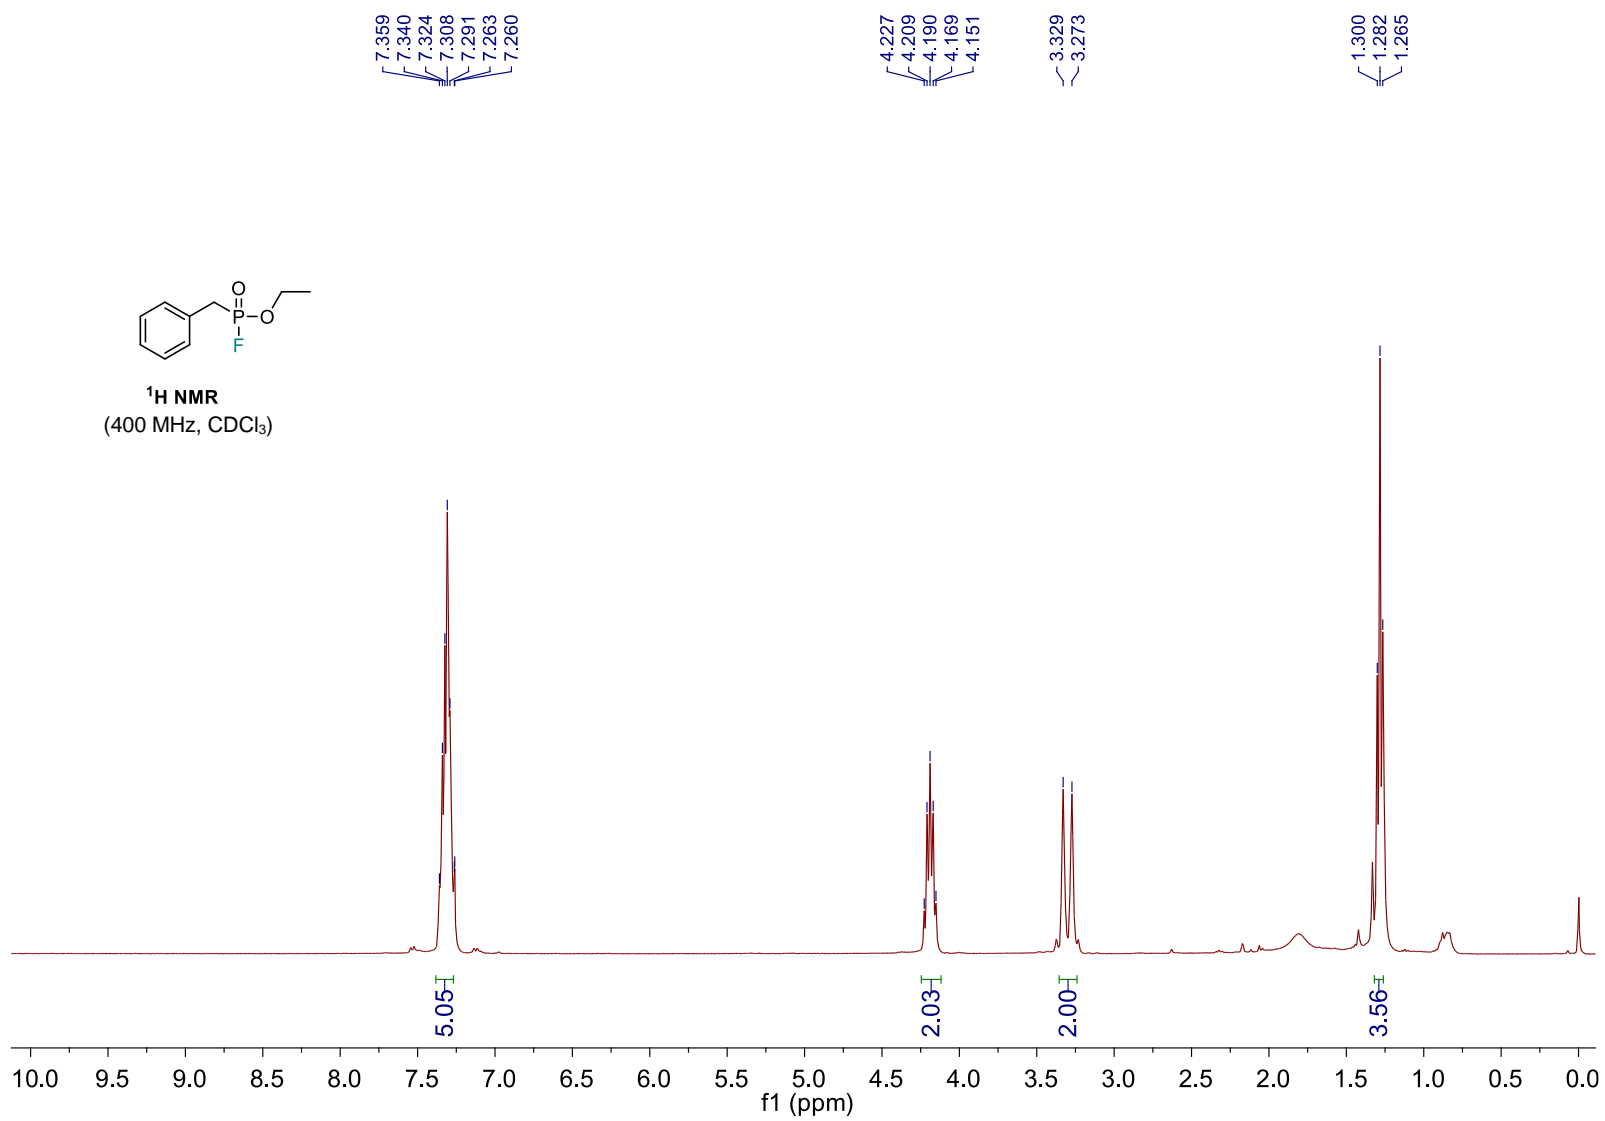

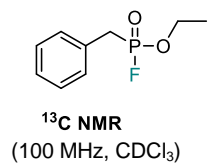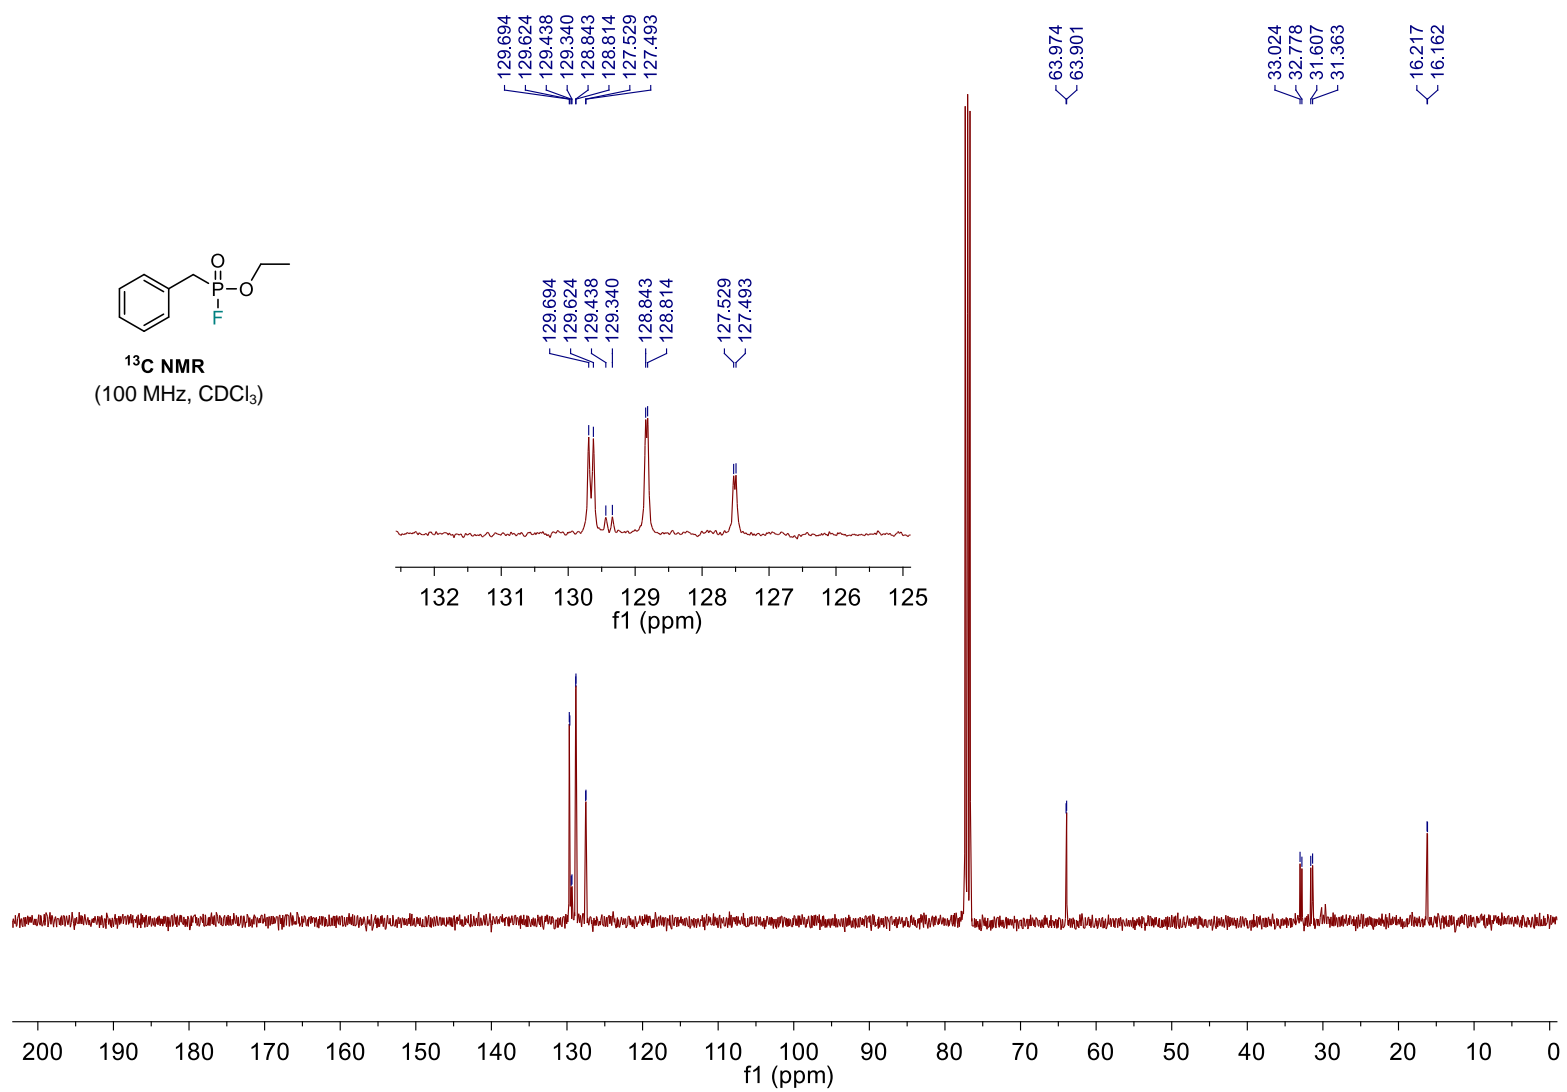

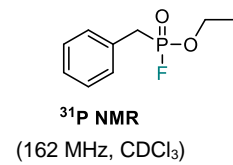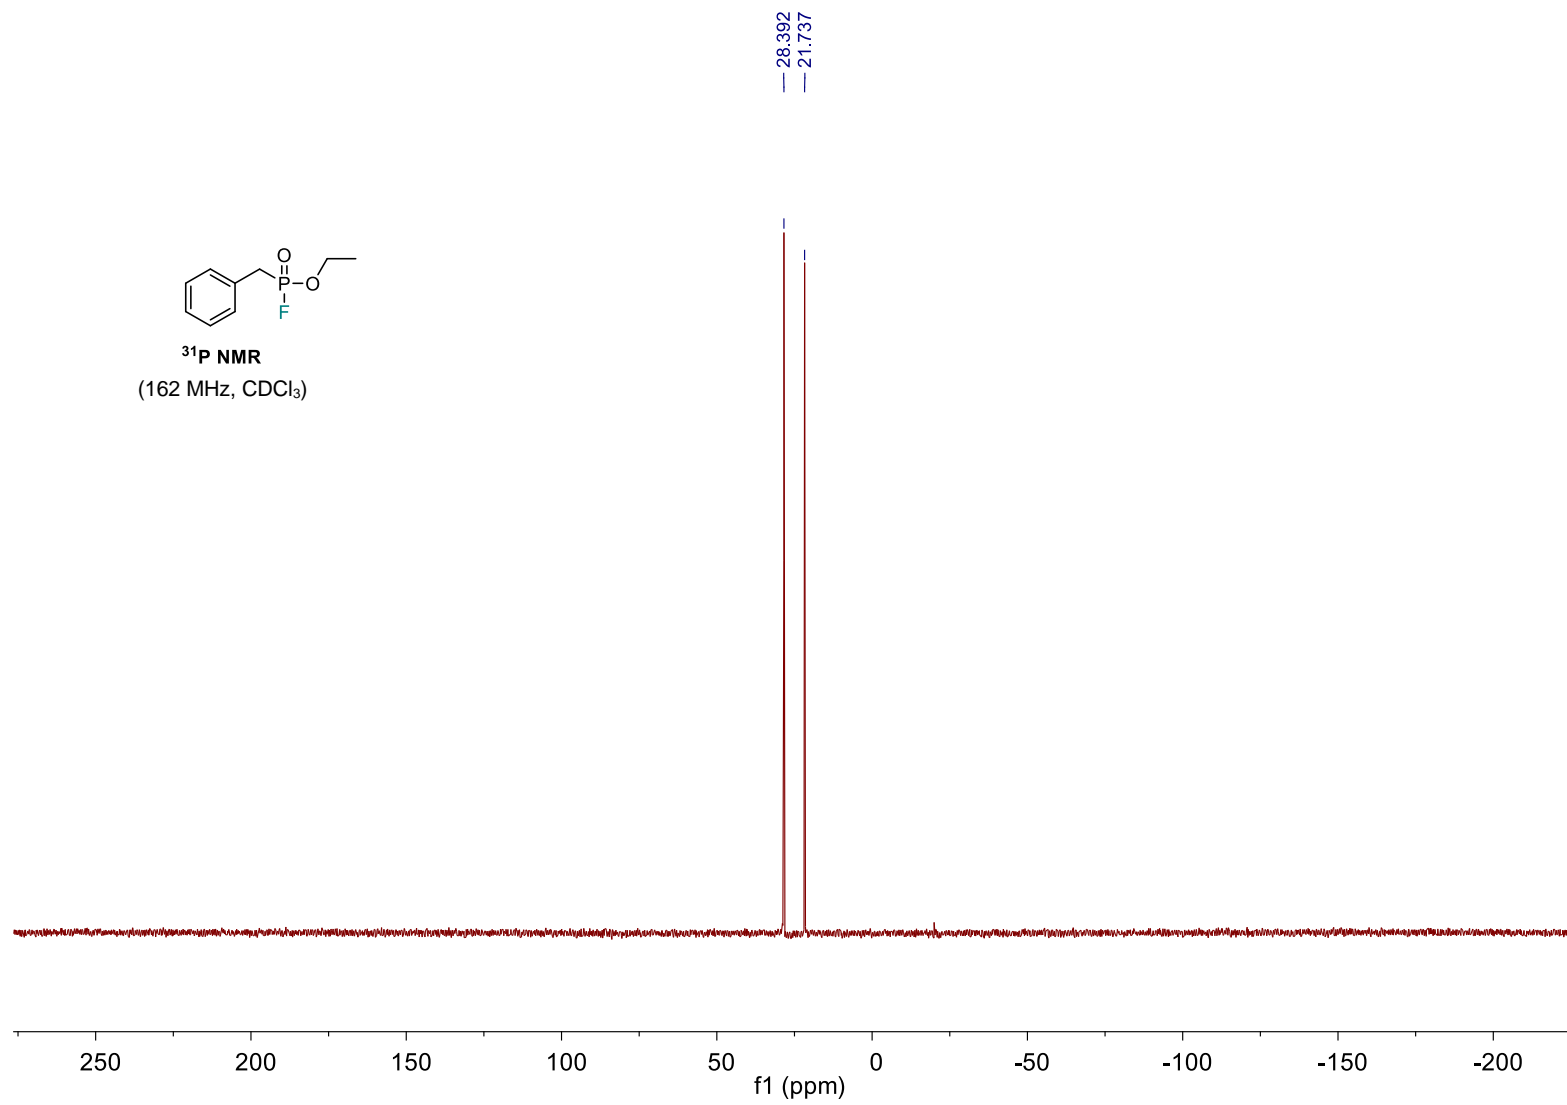

S251

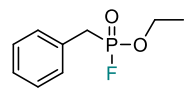

**<sup>19</sup>F NMR**  
(376 MHz, CDCl<sub>3</sub>)

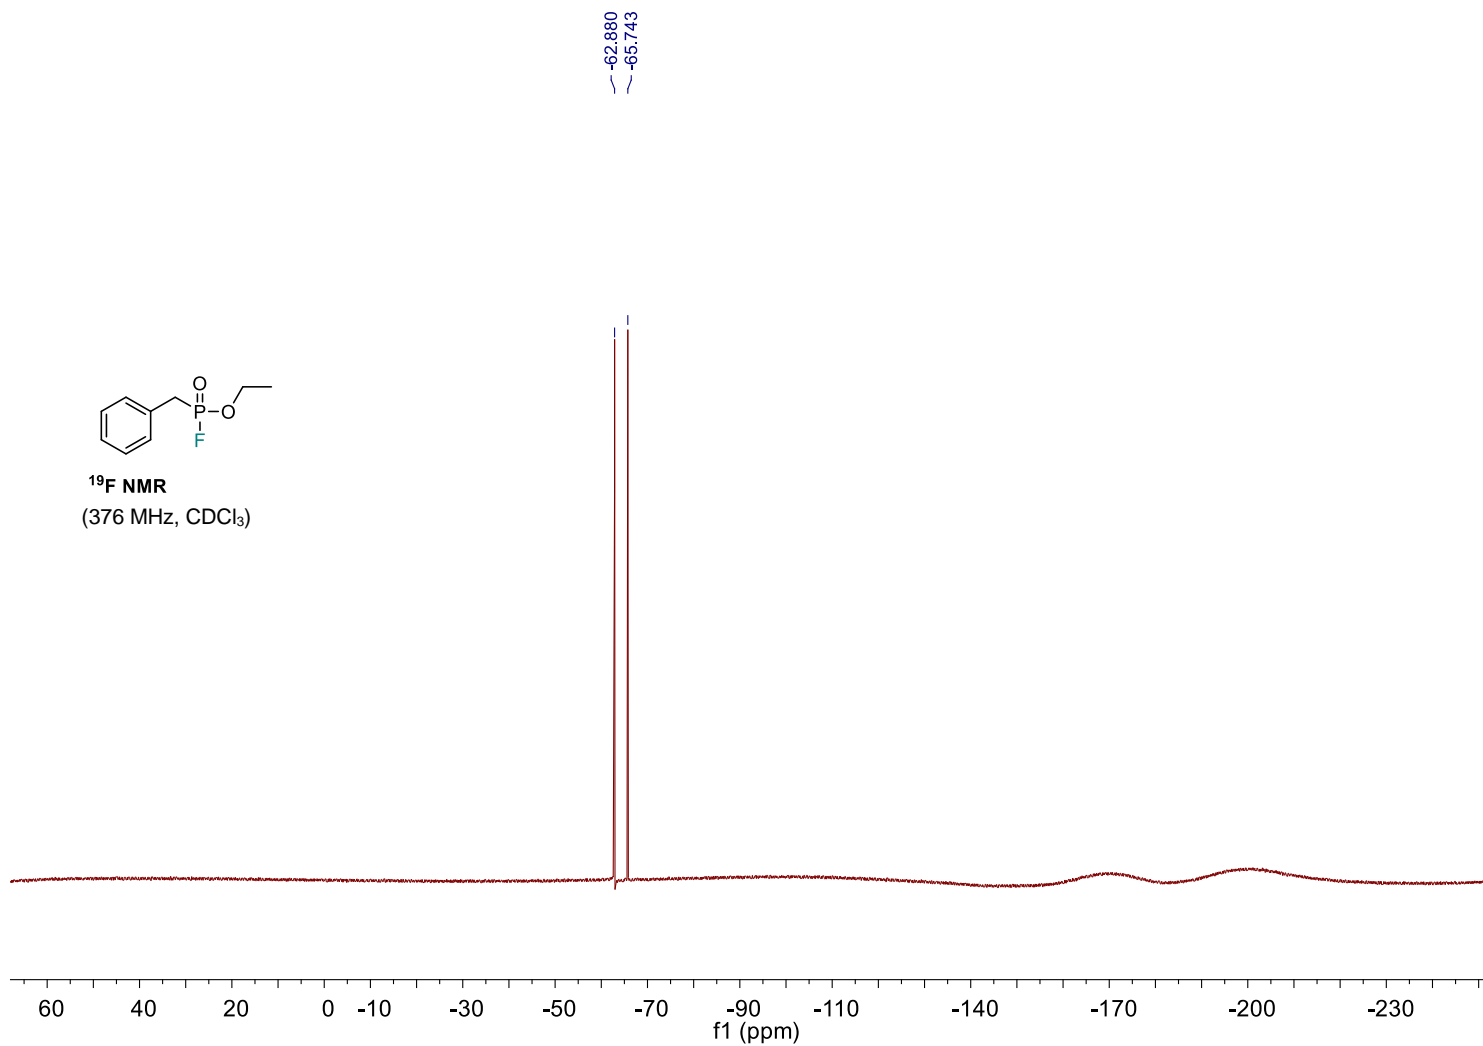

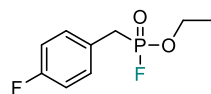

**<sup>1</sup>H NMR**  
(400 MHz, CDCl<sub>3</sub>)

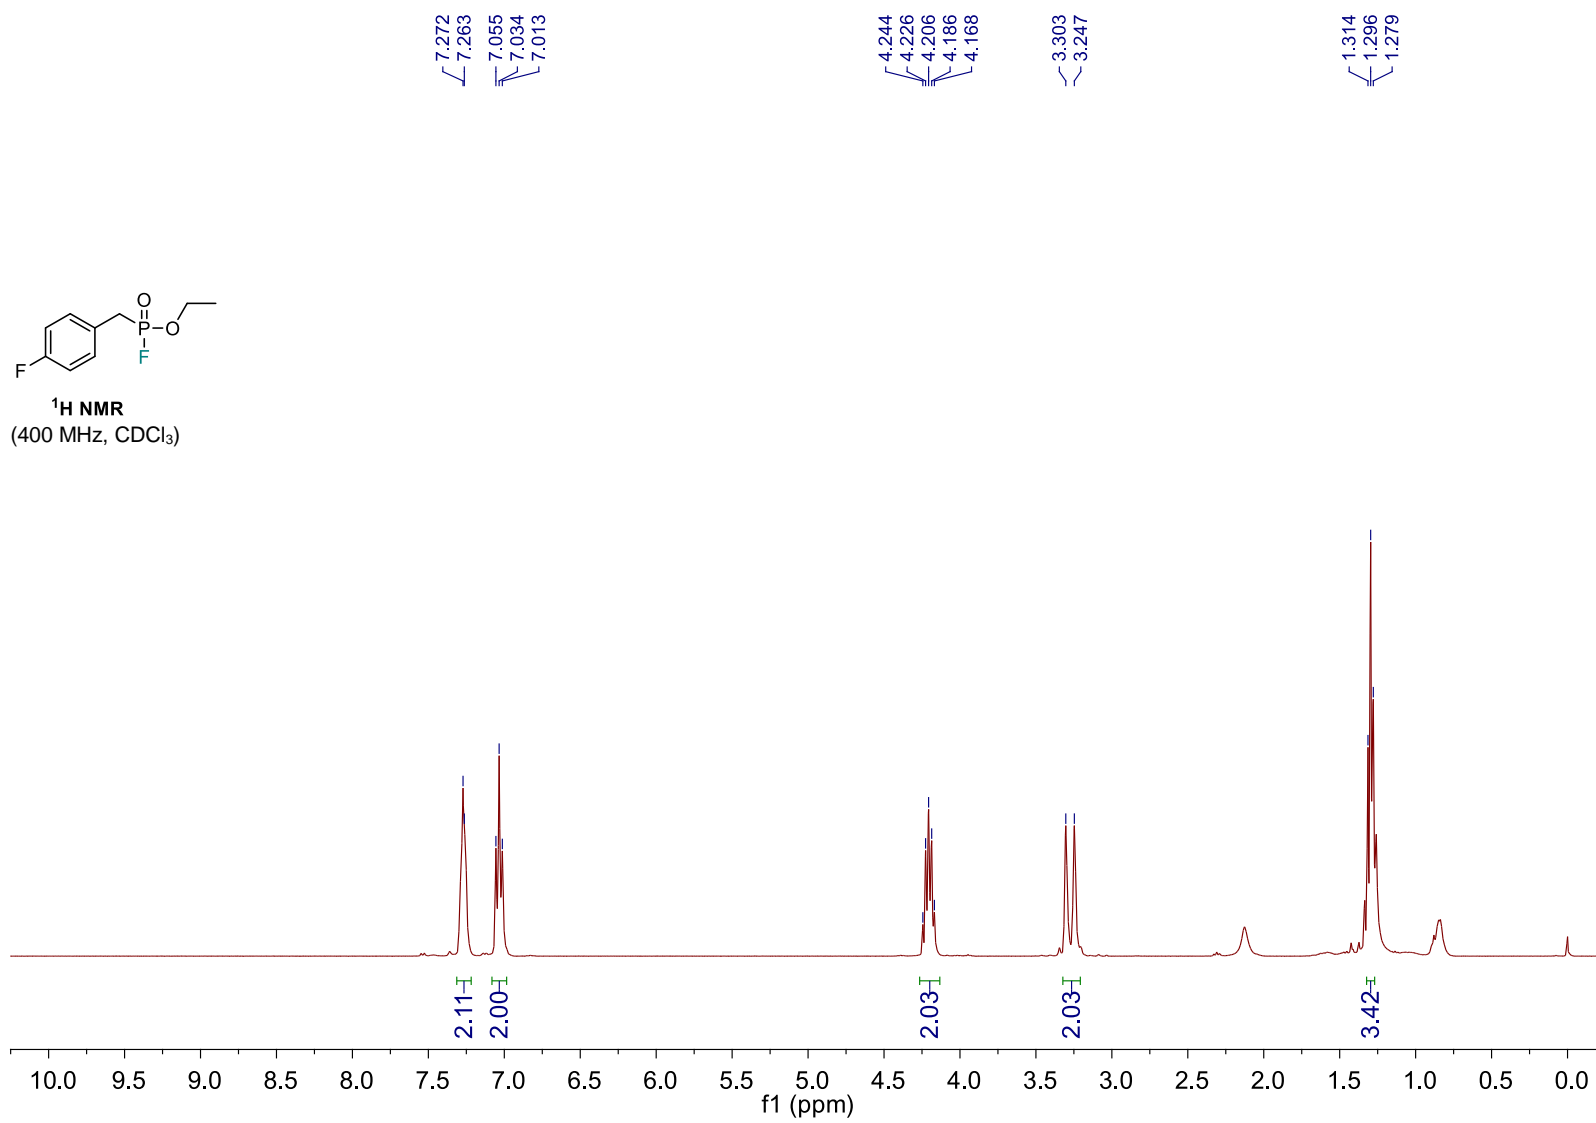

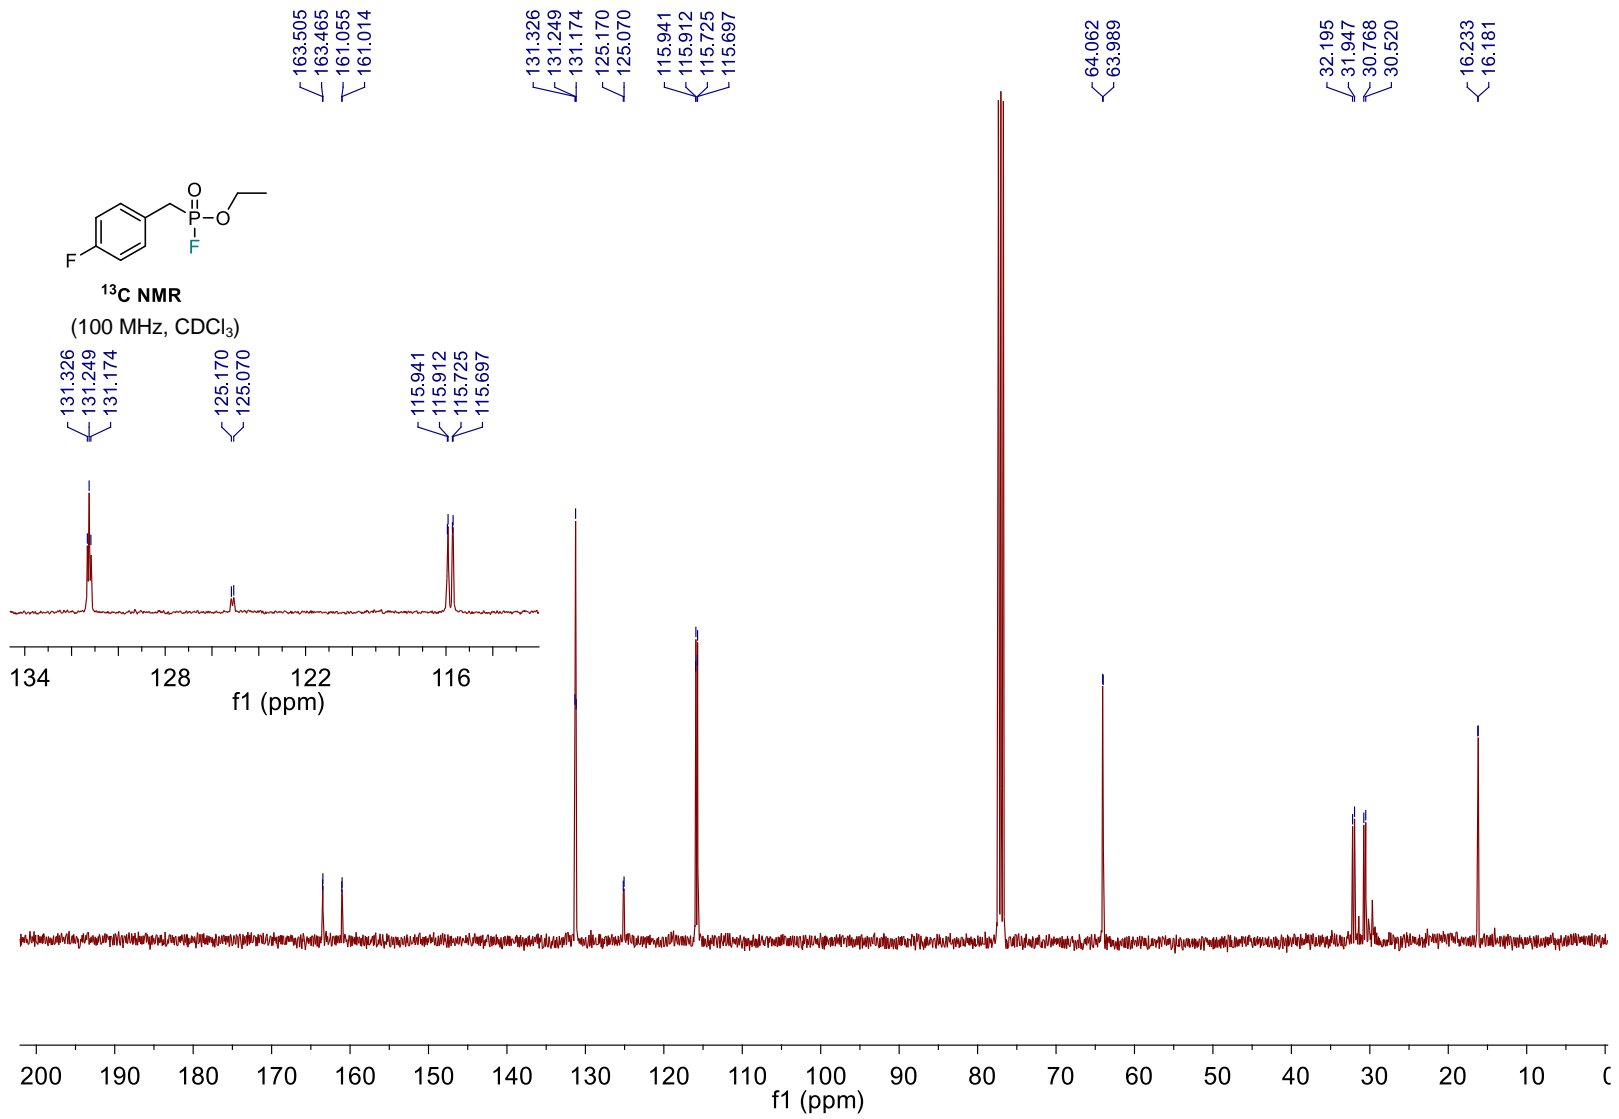

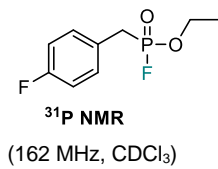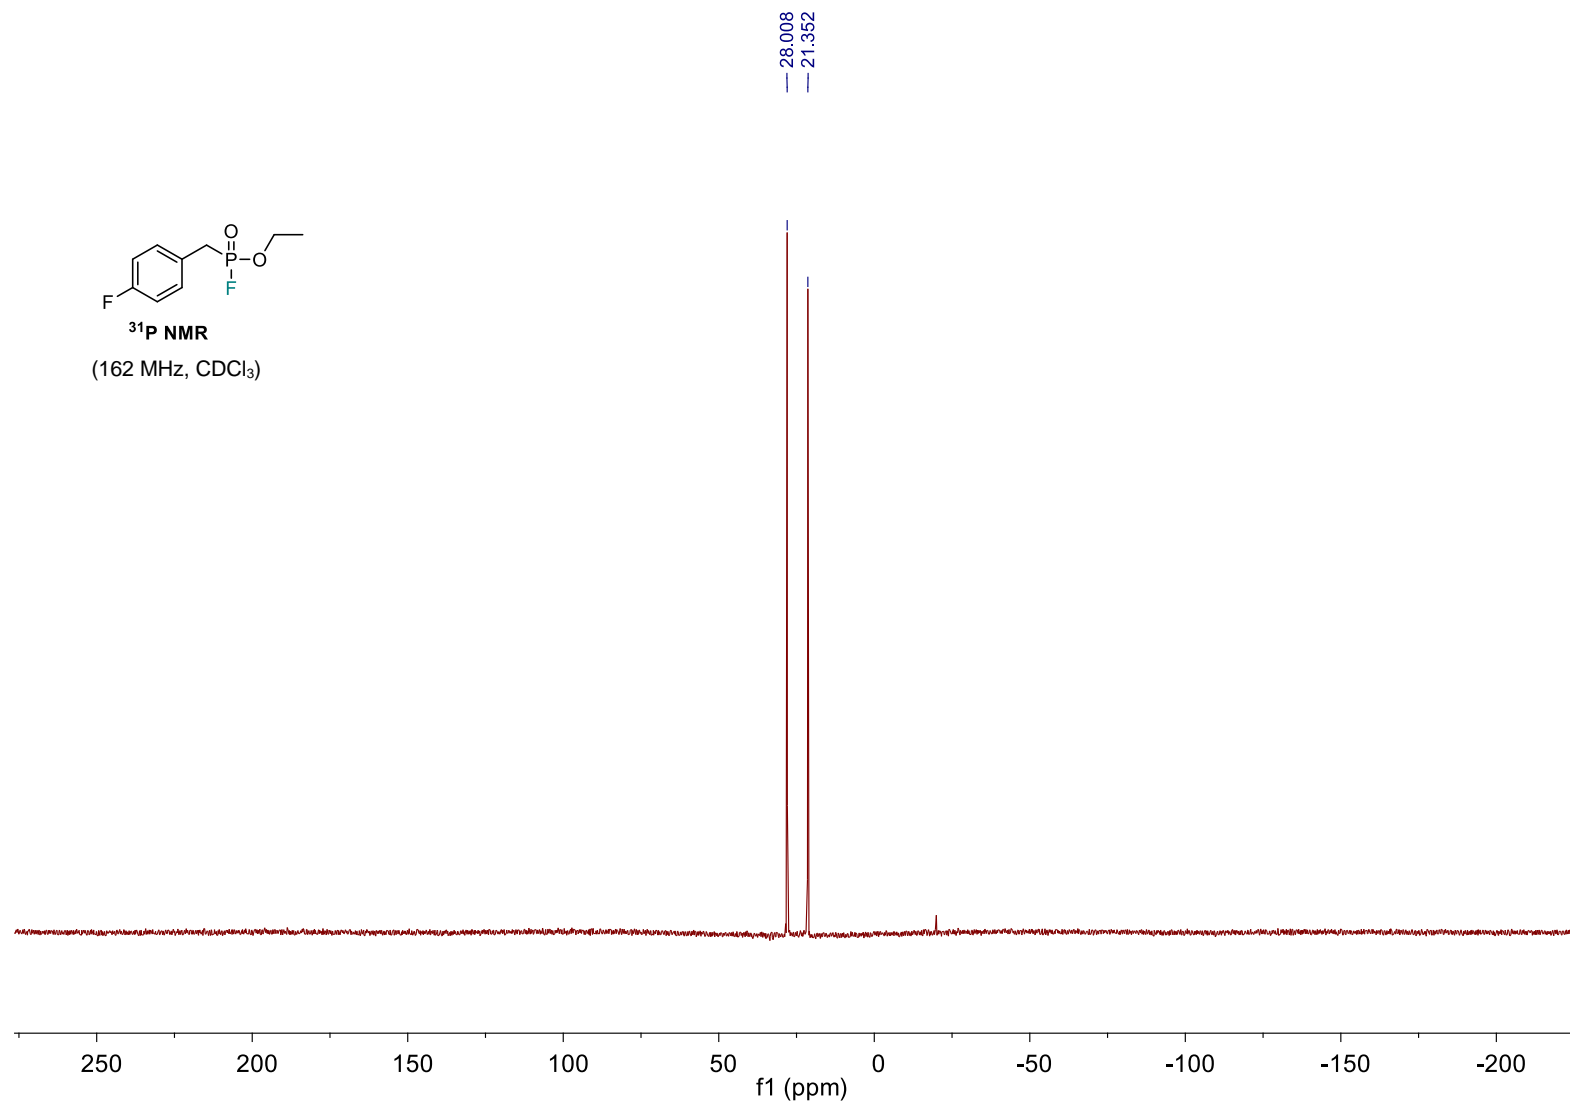

S255

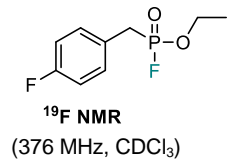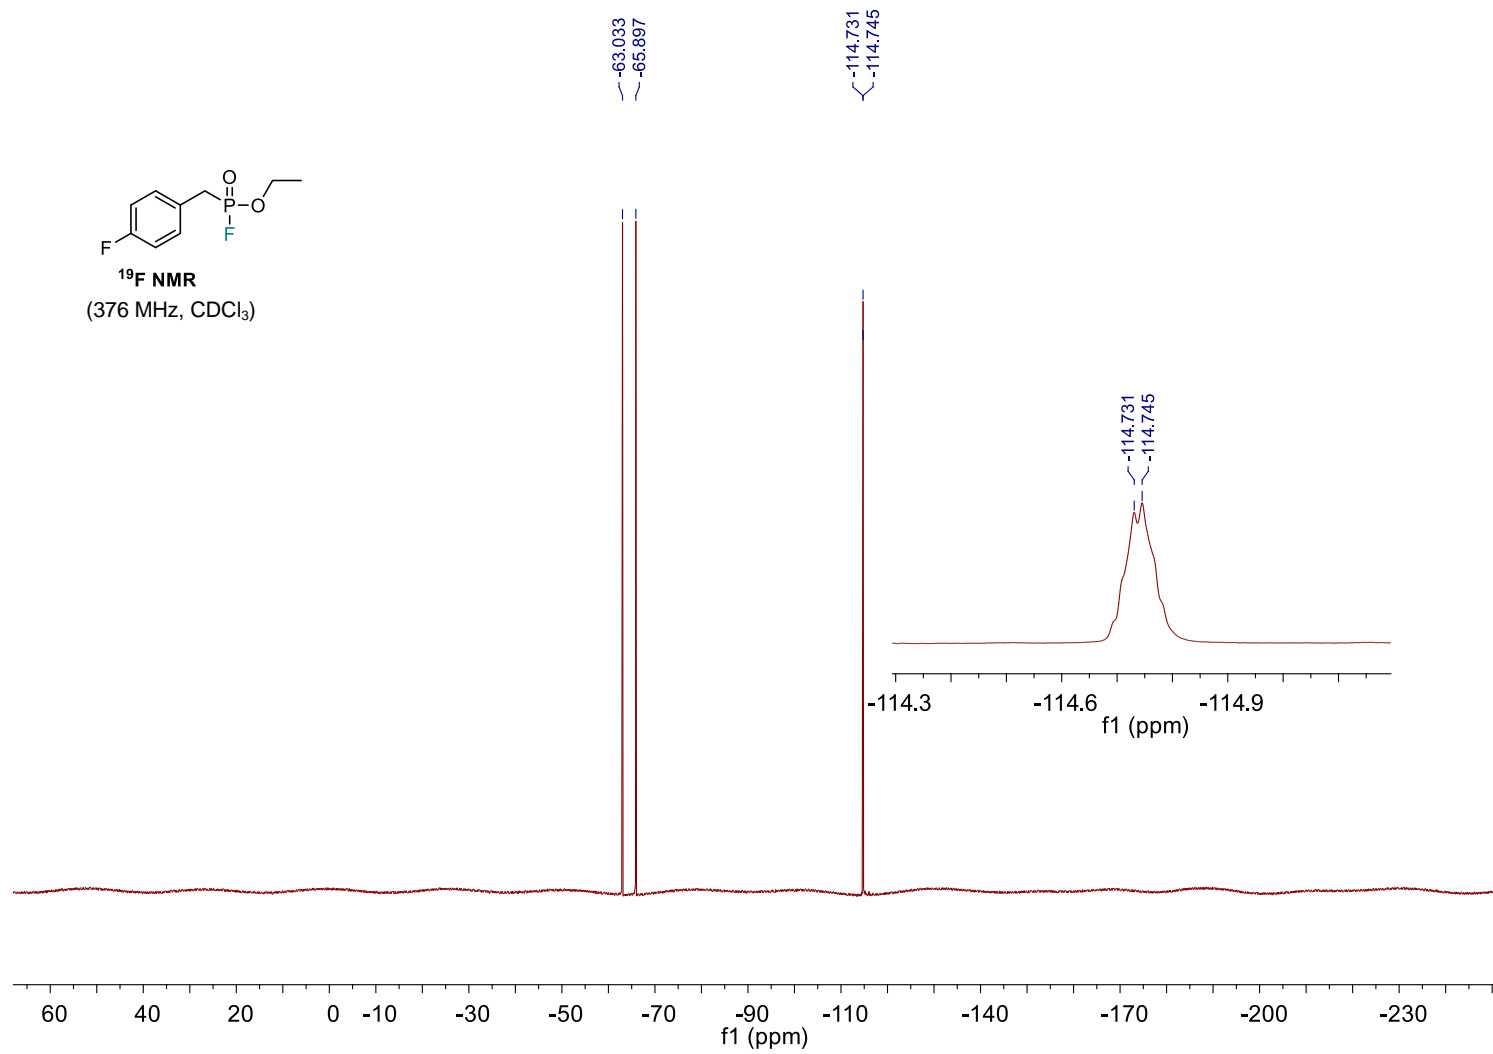



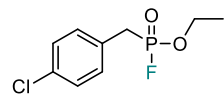

**<sup>1</sup>H NMR**  
(400 MHz, CDCl<sub>3</sub>)

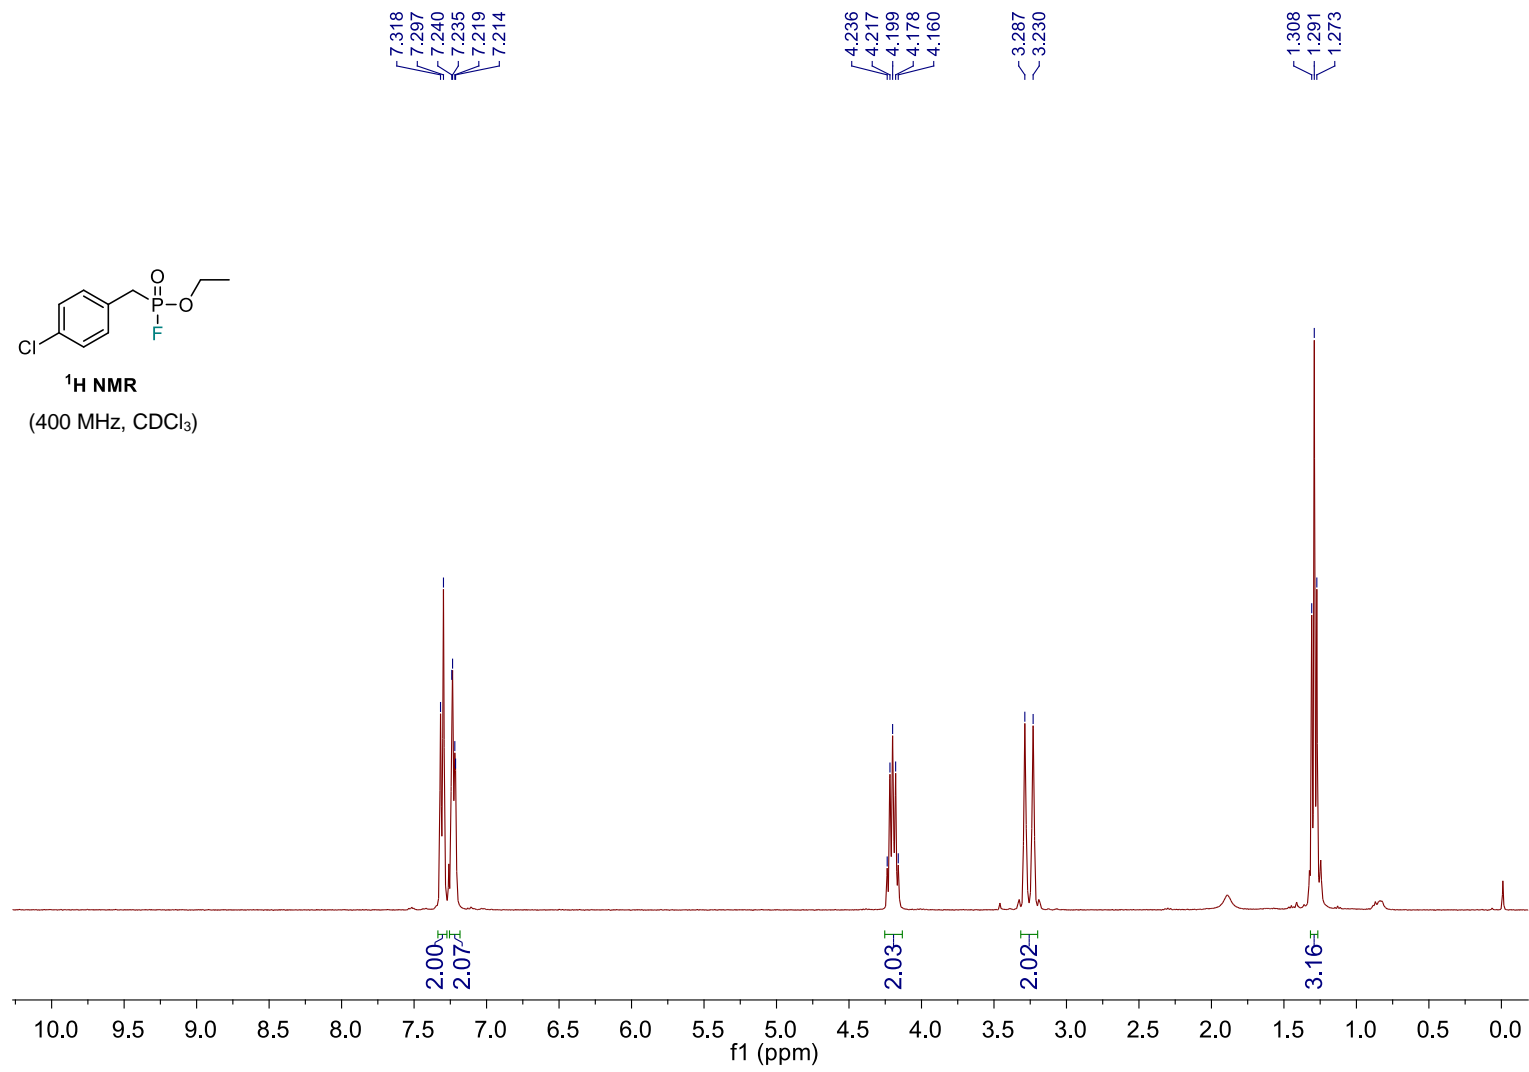

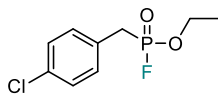

<sup>13</sup>C NMR  
(100 MHz, CDCl<sub>3</sub>)

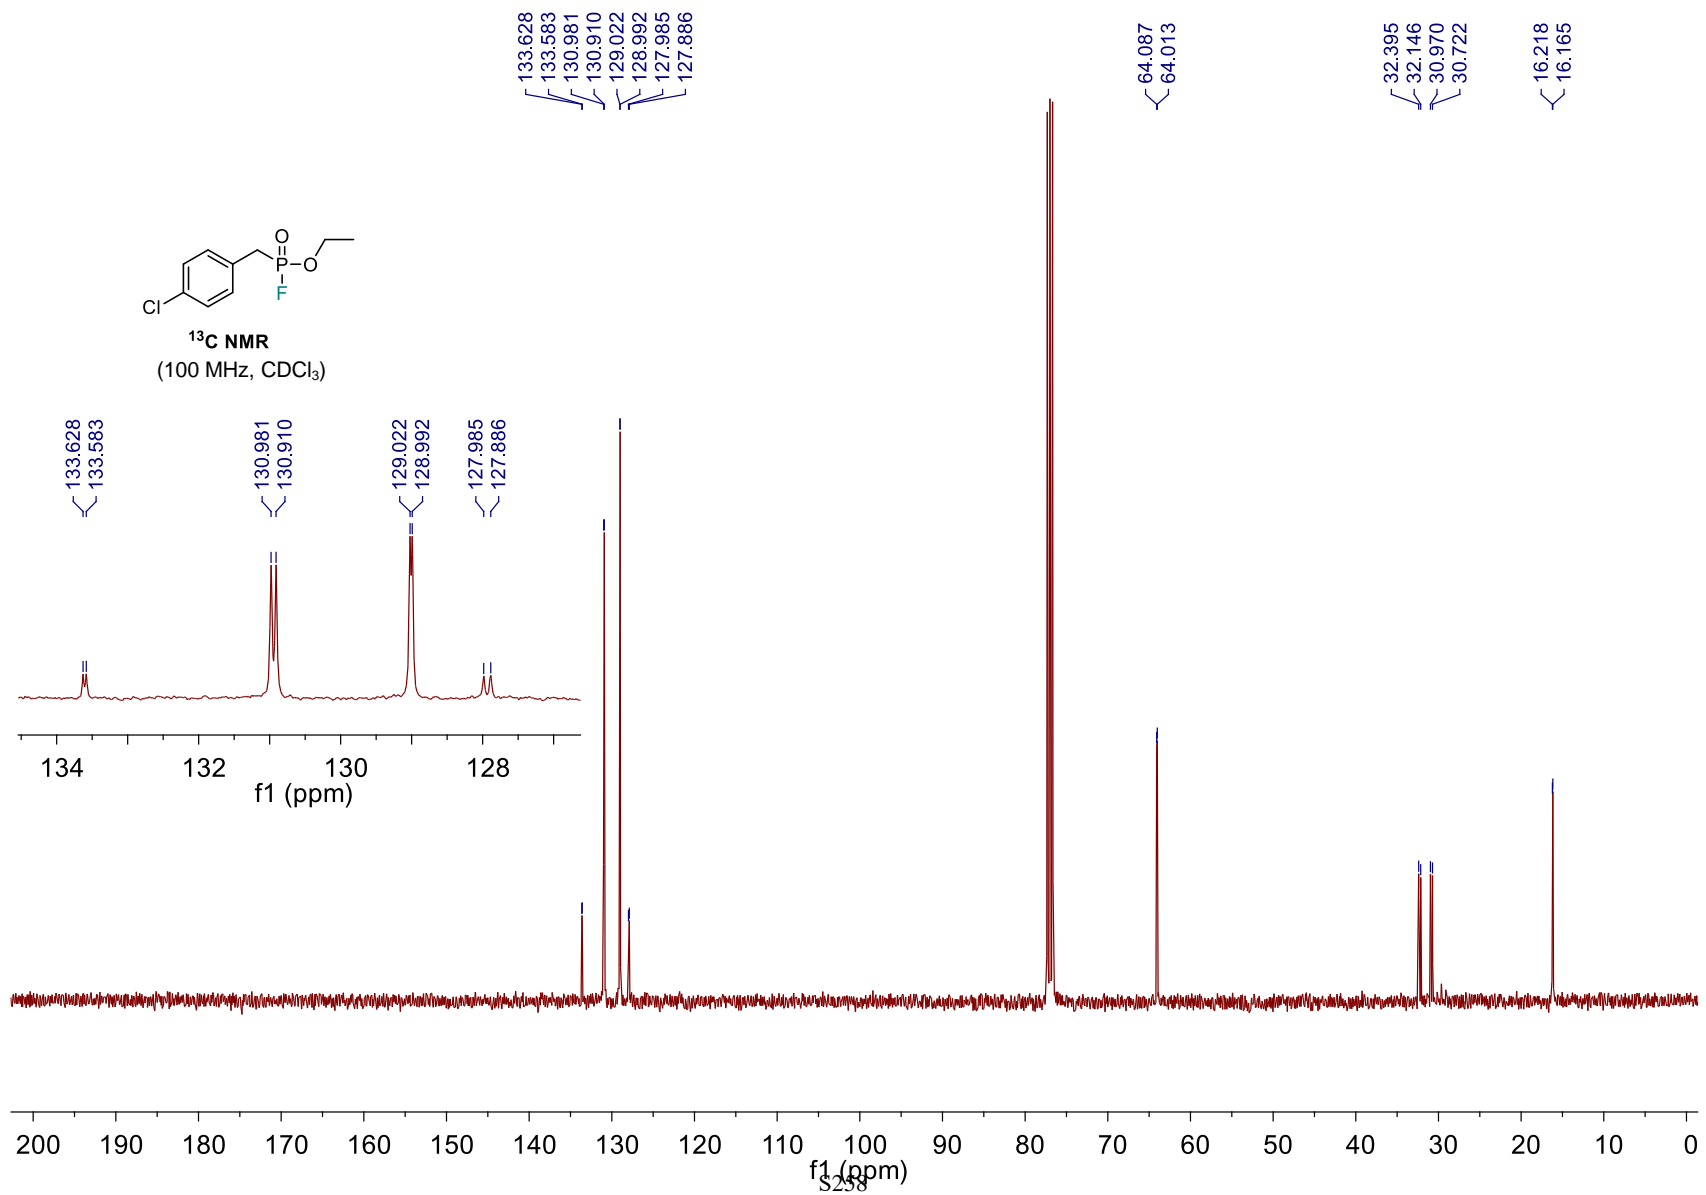

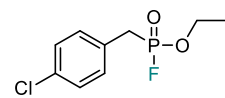

**<sup>31</sup>P NMR**  
(162 MHz, CDCl<sub>3</sub>)

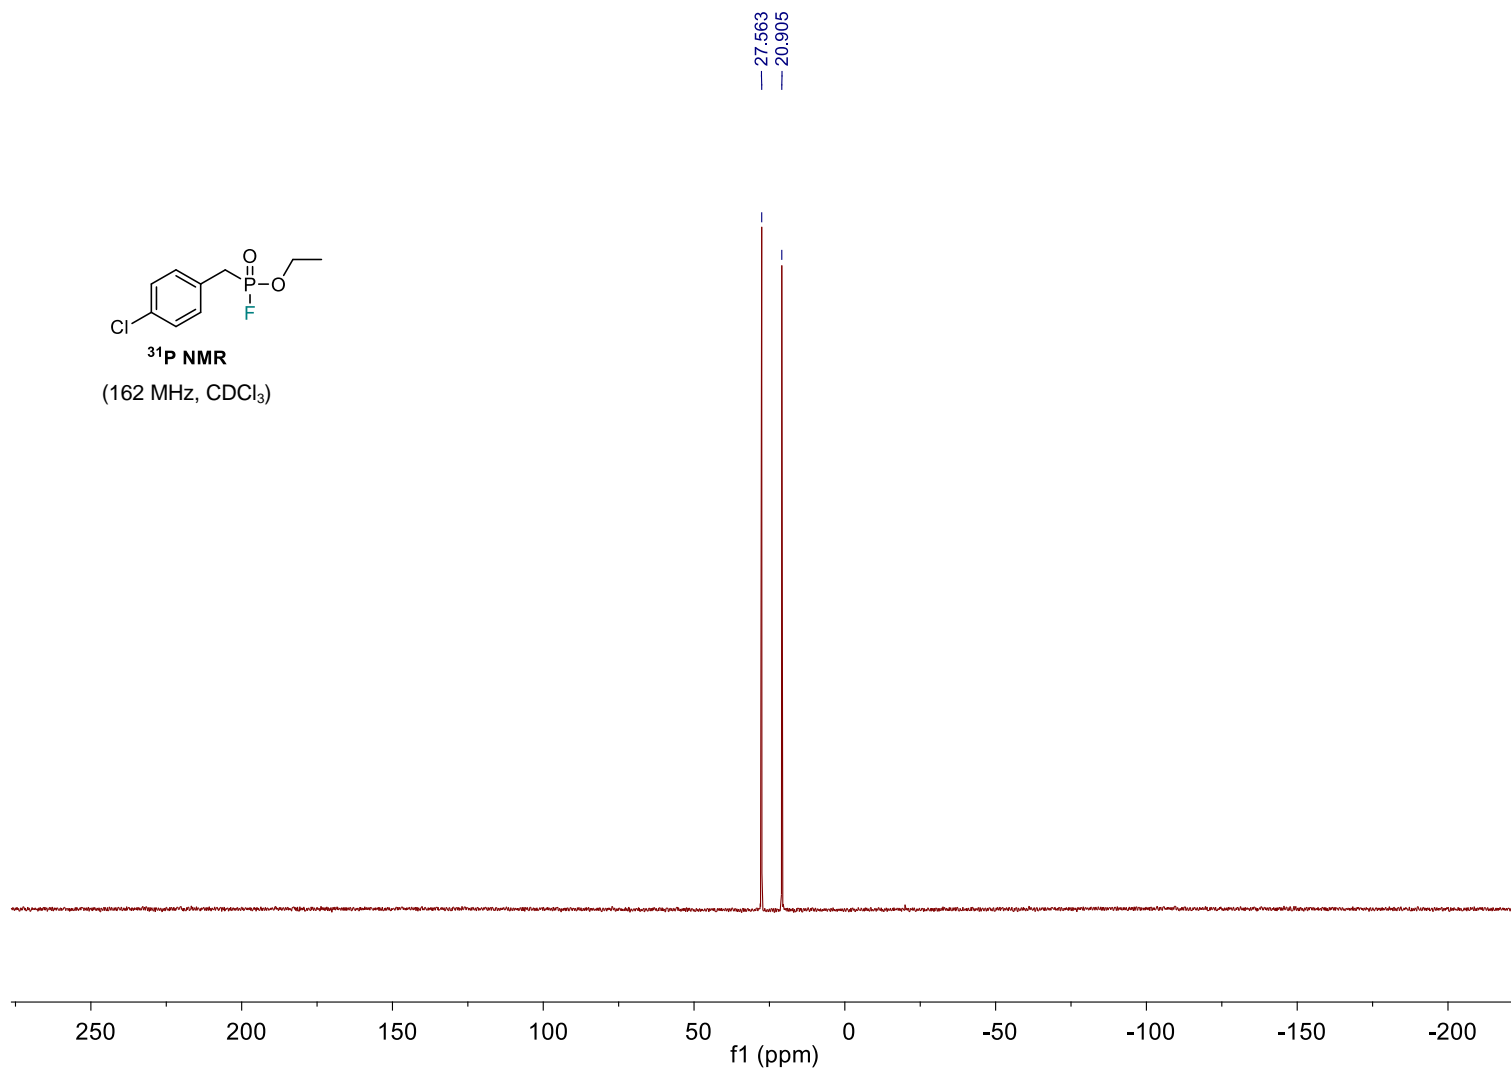

S259

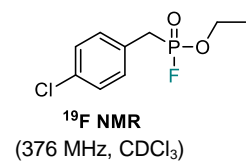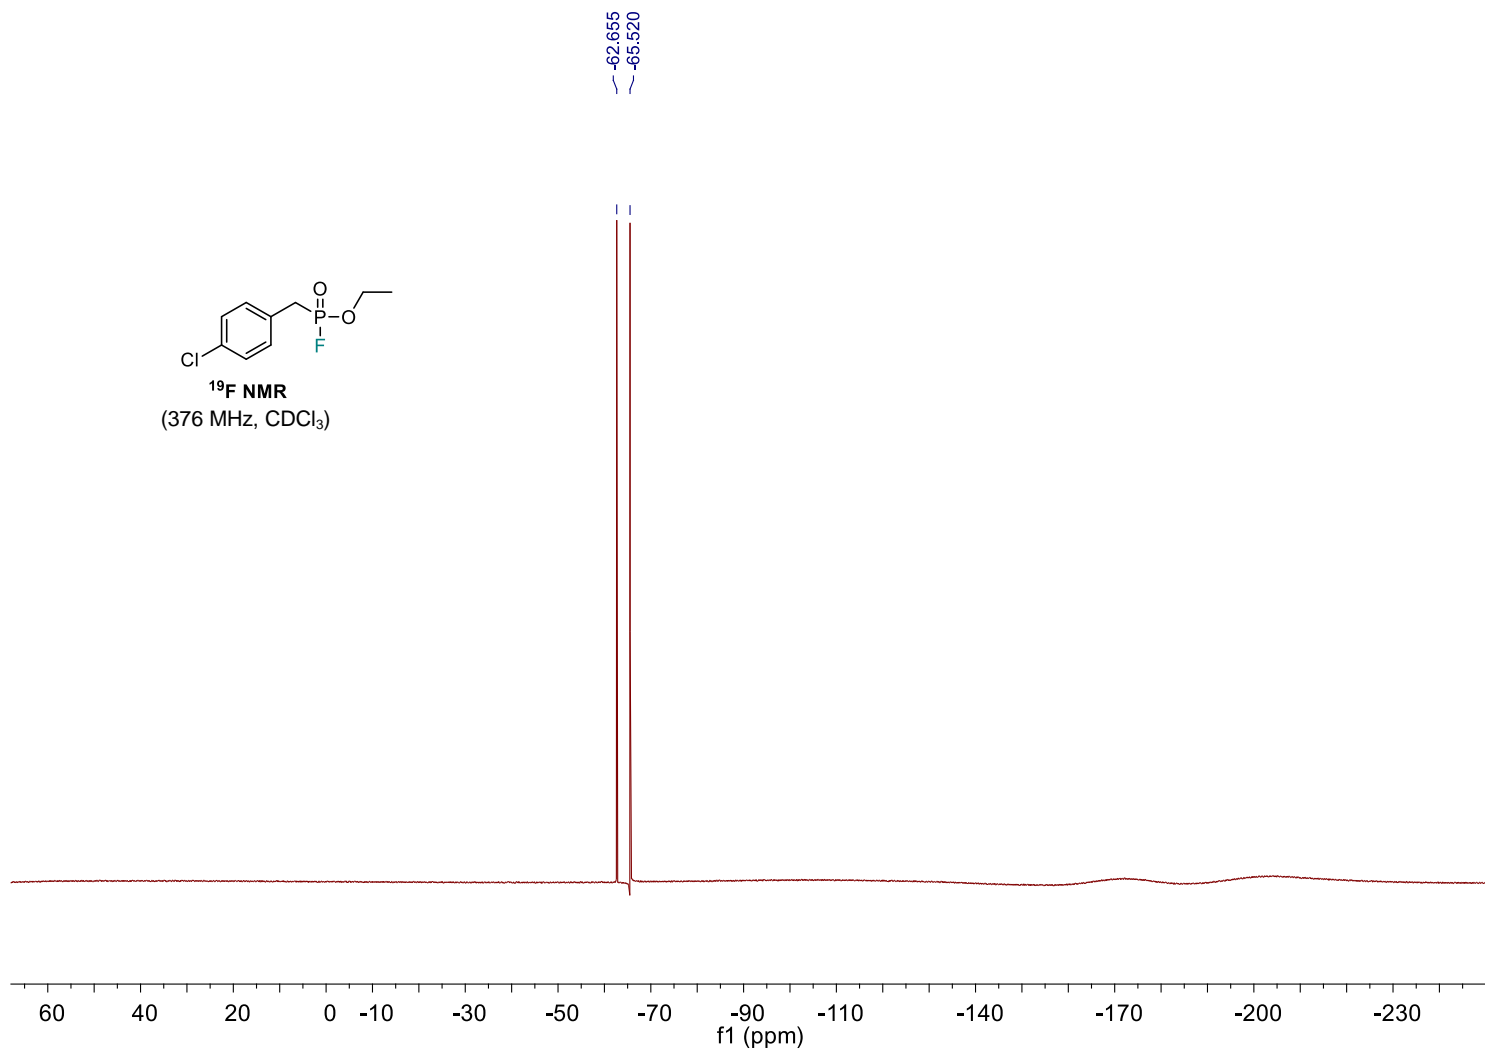

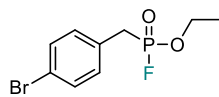

**<sup>1</sup>H NMR**  
(400 MHz, CDCl<sub>3</sub>)

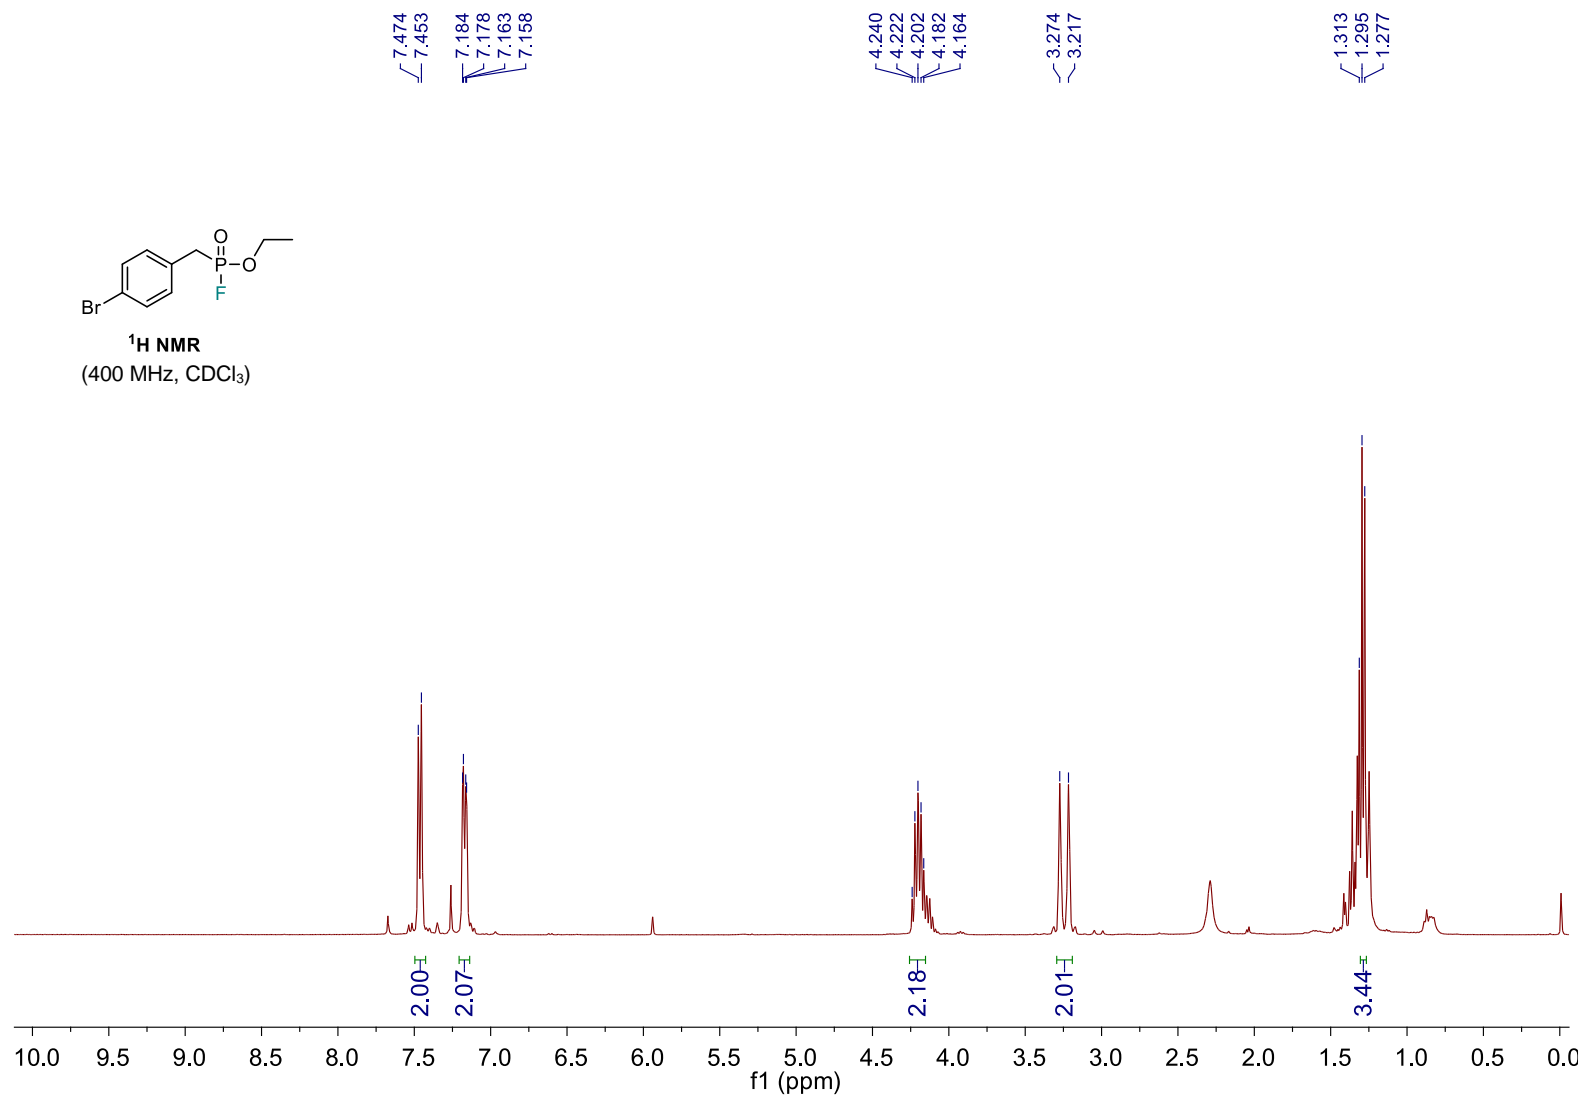

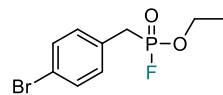

**<sup>13</sup>C NMR**  
(100 MHz, CDCl<sub>3</sub>)

131.995  
131.967  
131.327  
131.256  
128.511  
128.413  
121.709  
121.661

64.130  
64.057

32.484  
32.236  
31.061  
30.813

16.232  
16.177

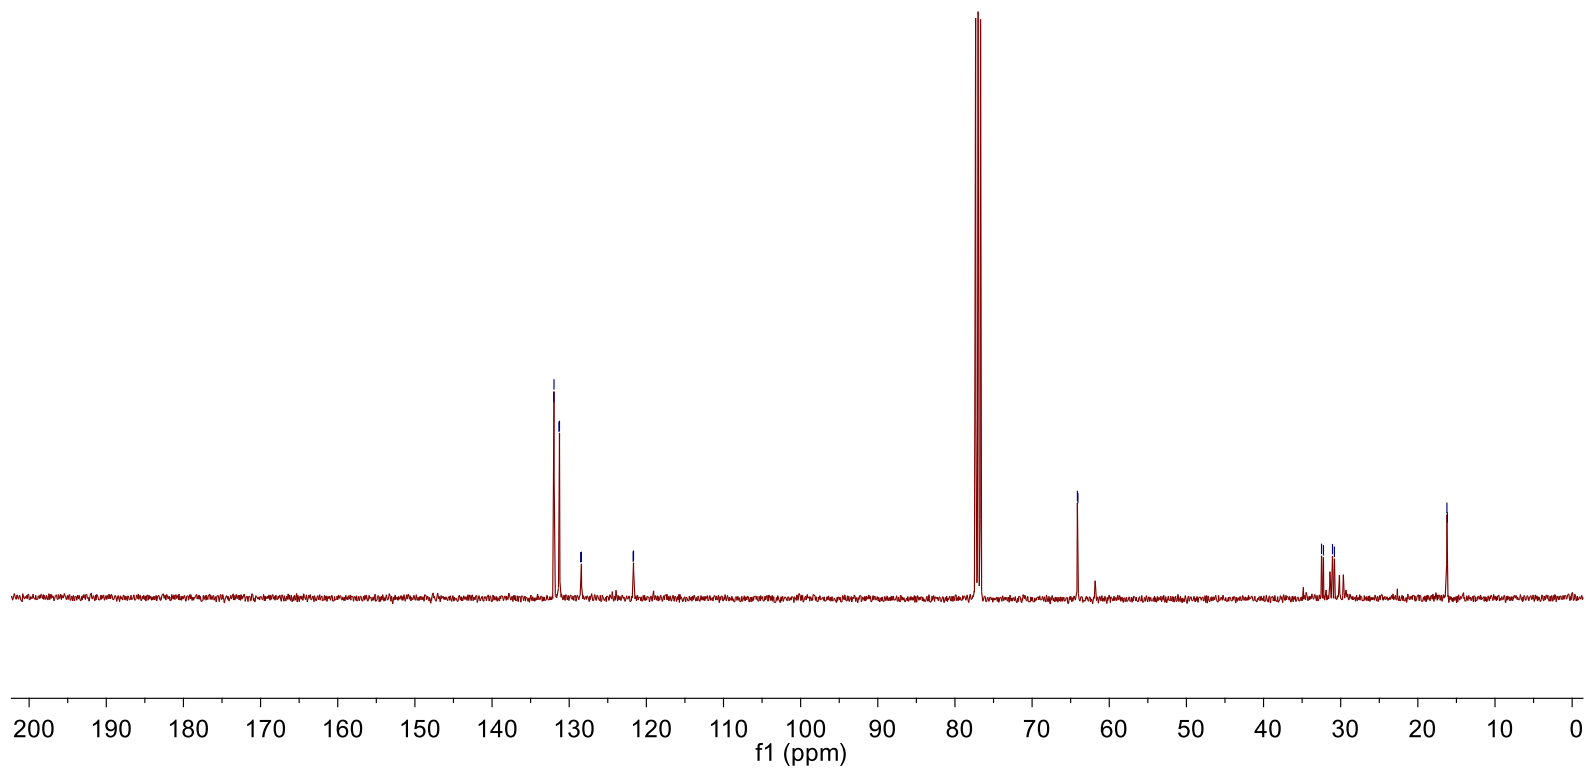

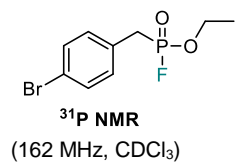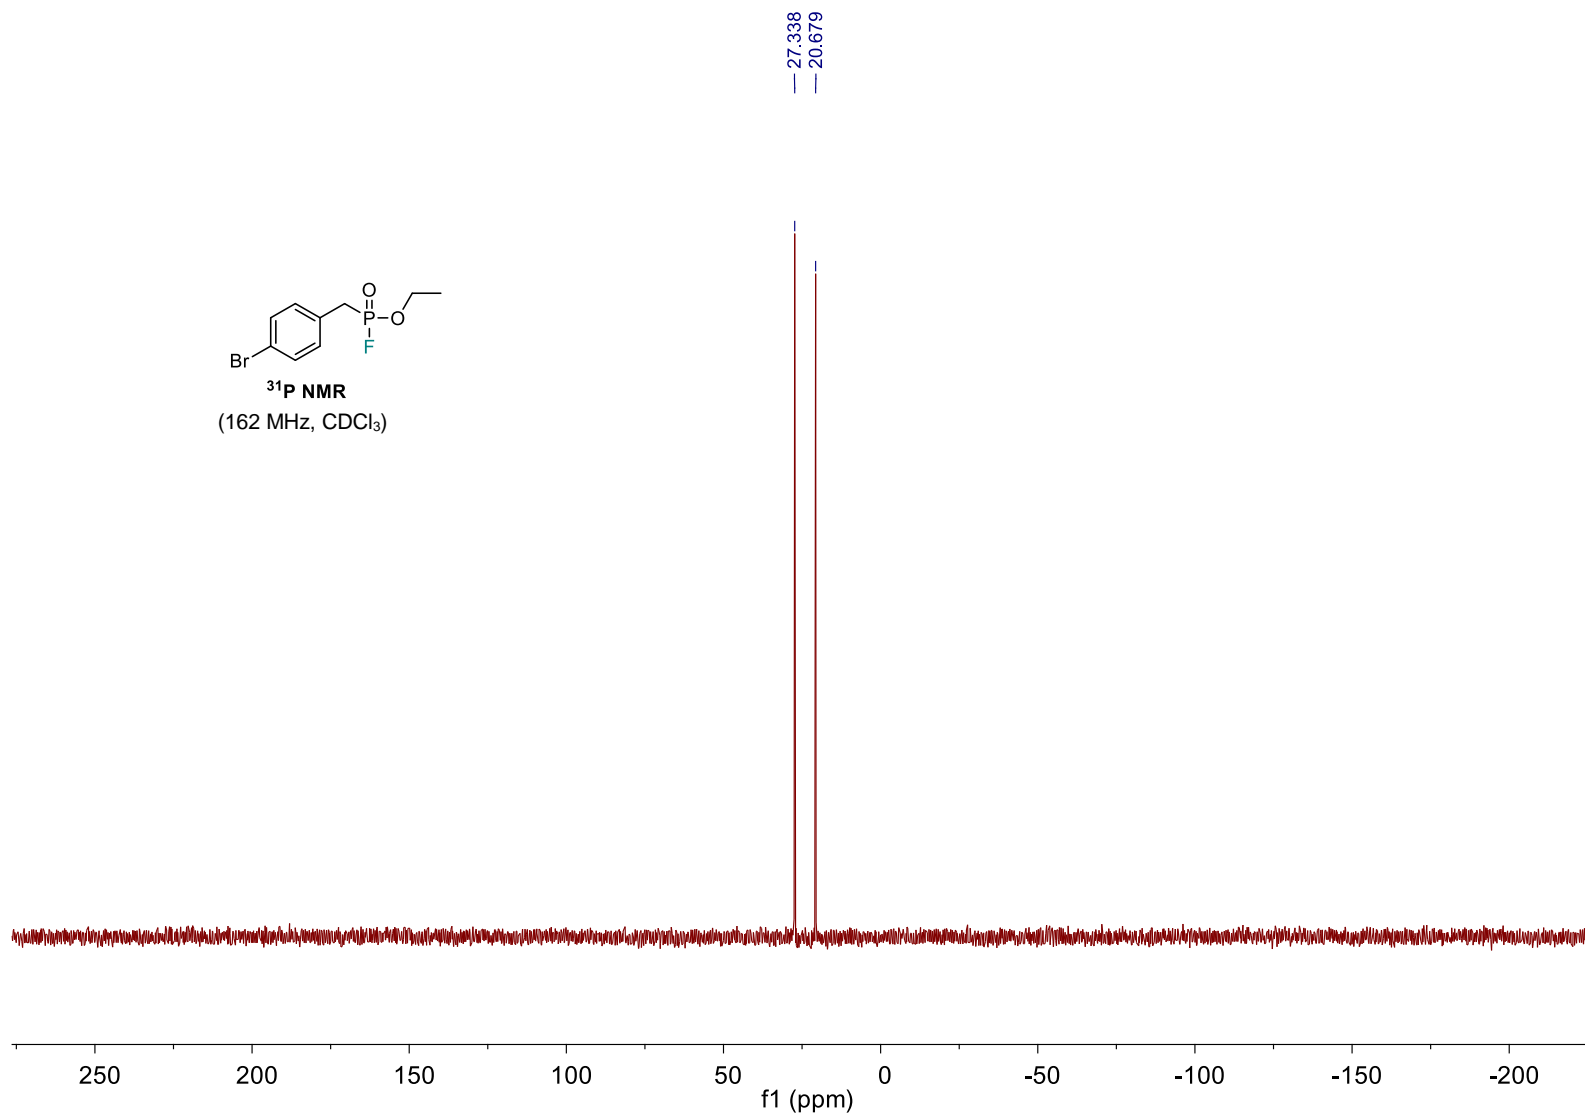

S263

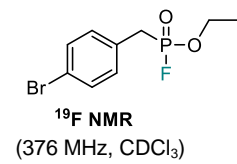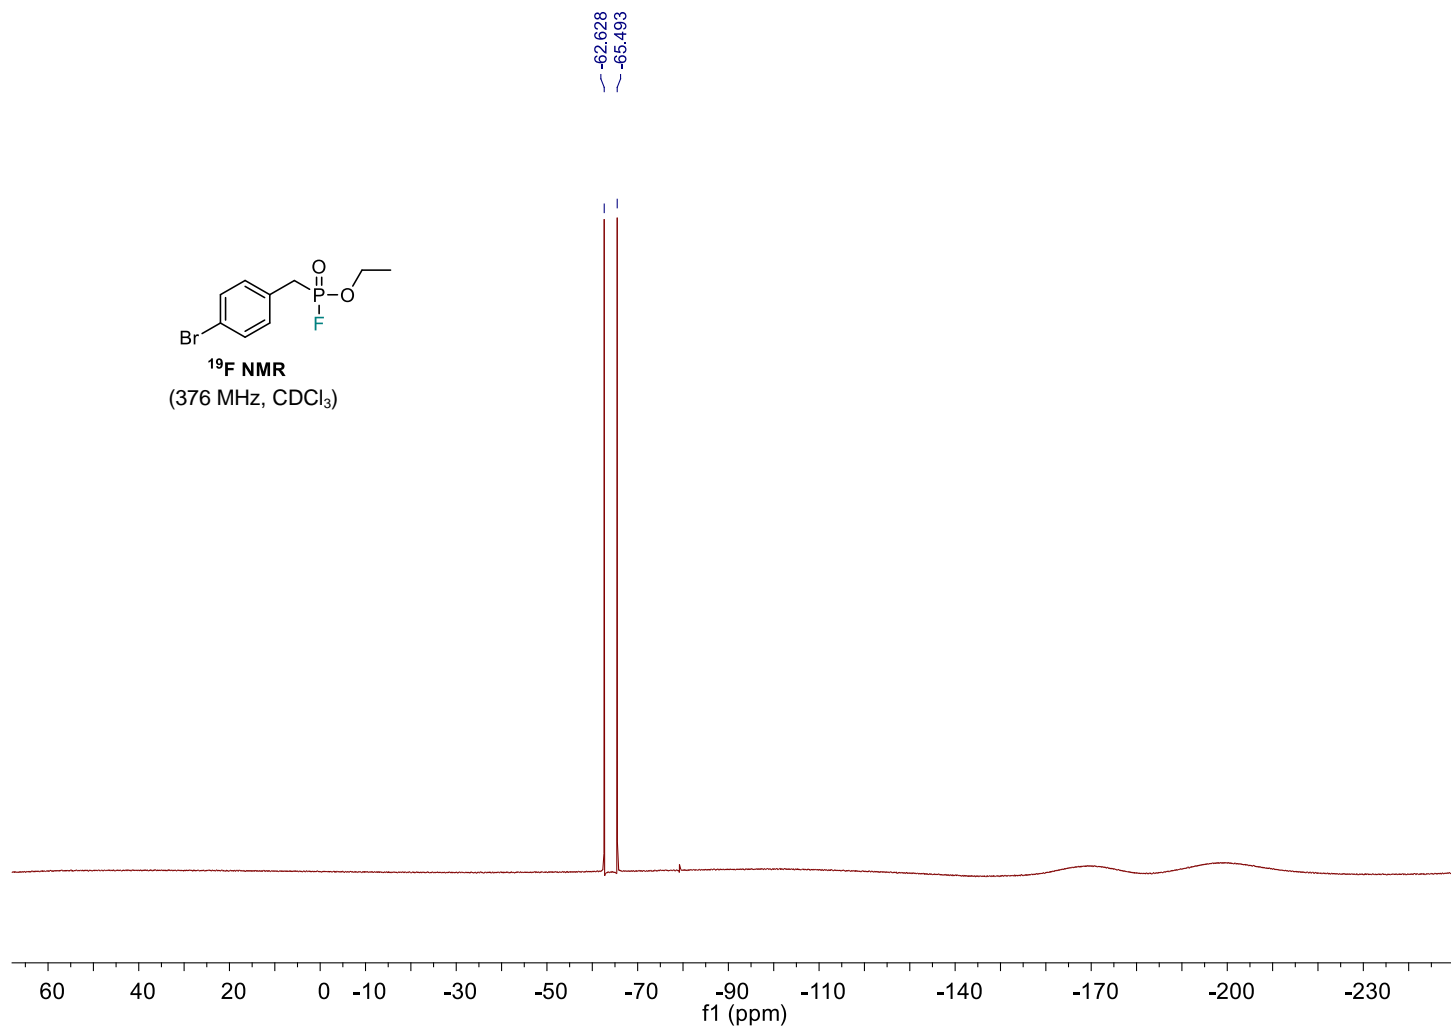



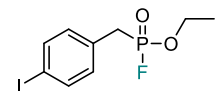

<sup>1</sup>H NMR  
(400 MHz, CDCl<sub>3</sub>)

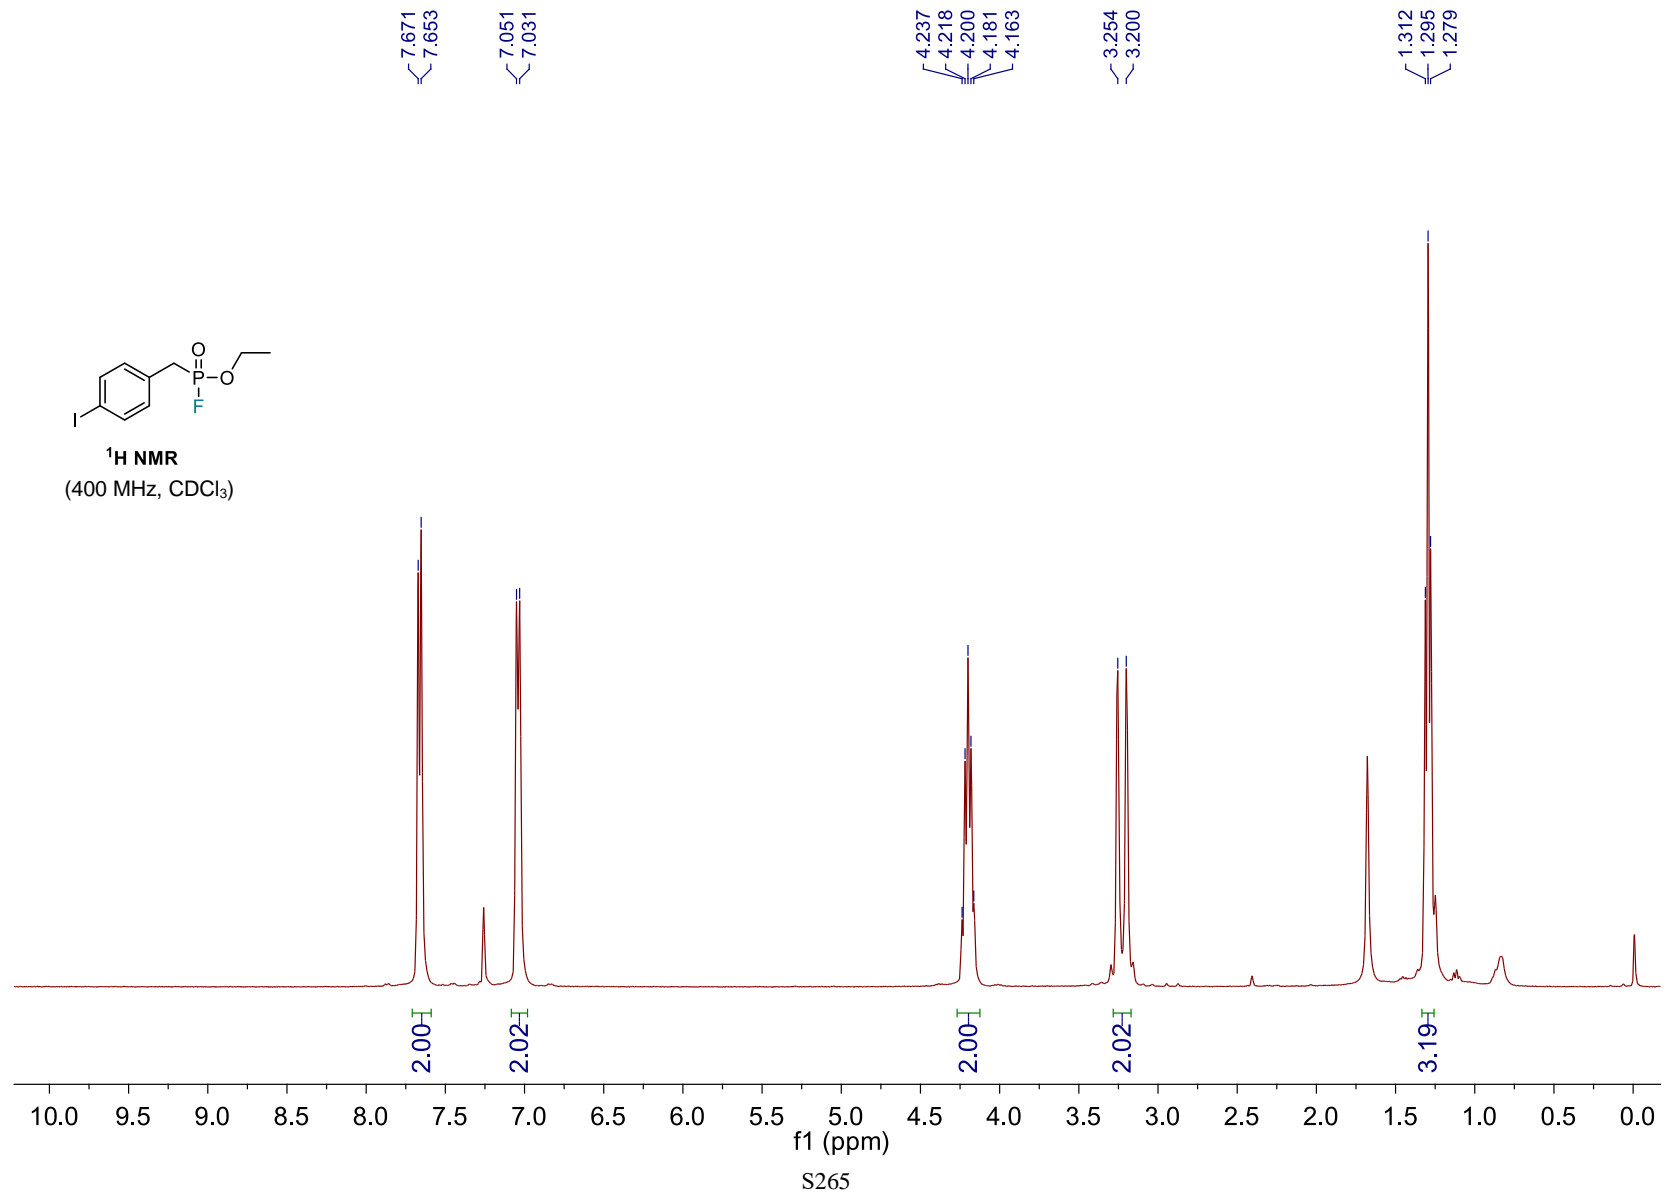

S265

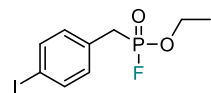

<sup>13</sup>C NMR  
(100 MHz, CDCl<sub>3</sub>)

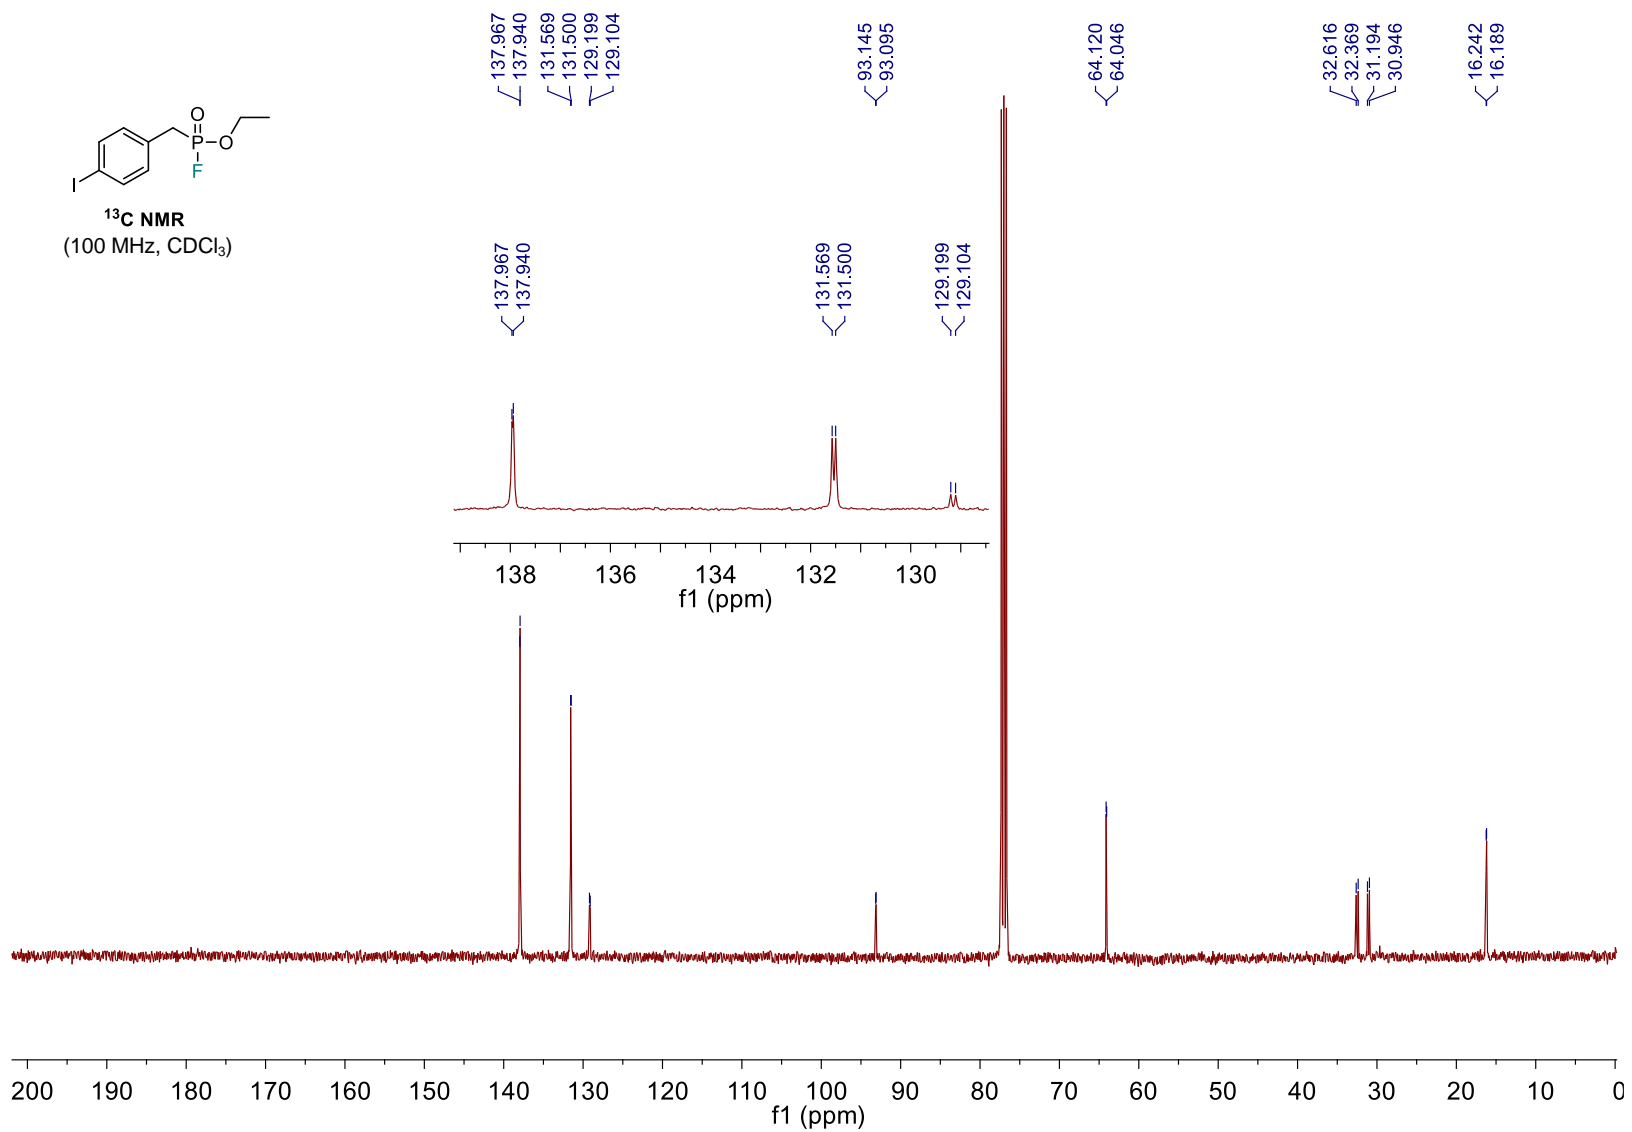

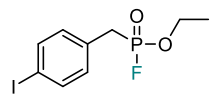

**<sup>31</sup>P NMR**  
(162 MHz, CDCl<sub>3</sub>)

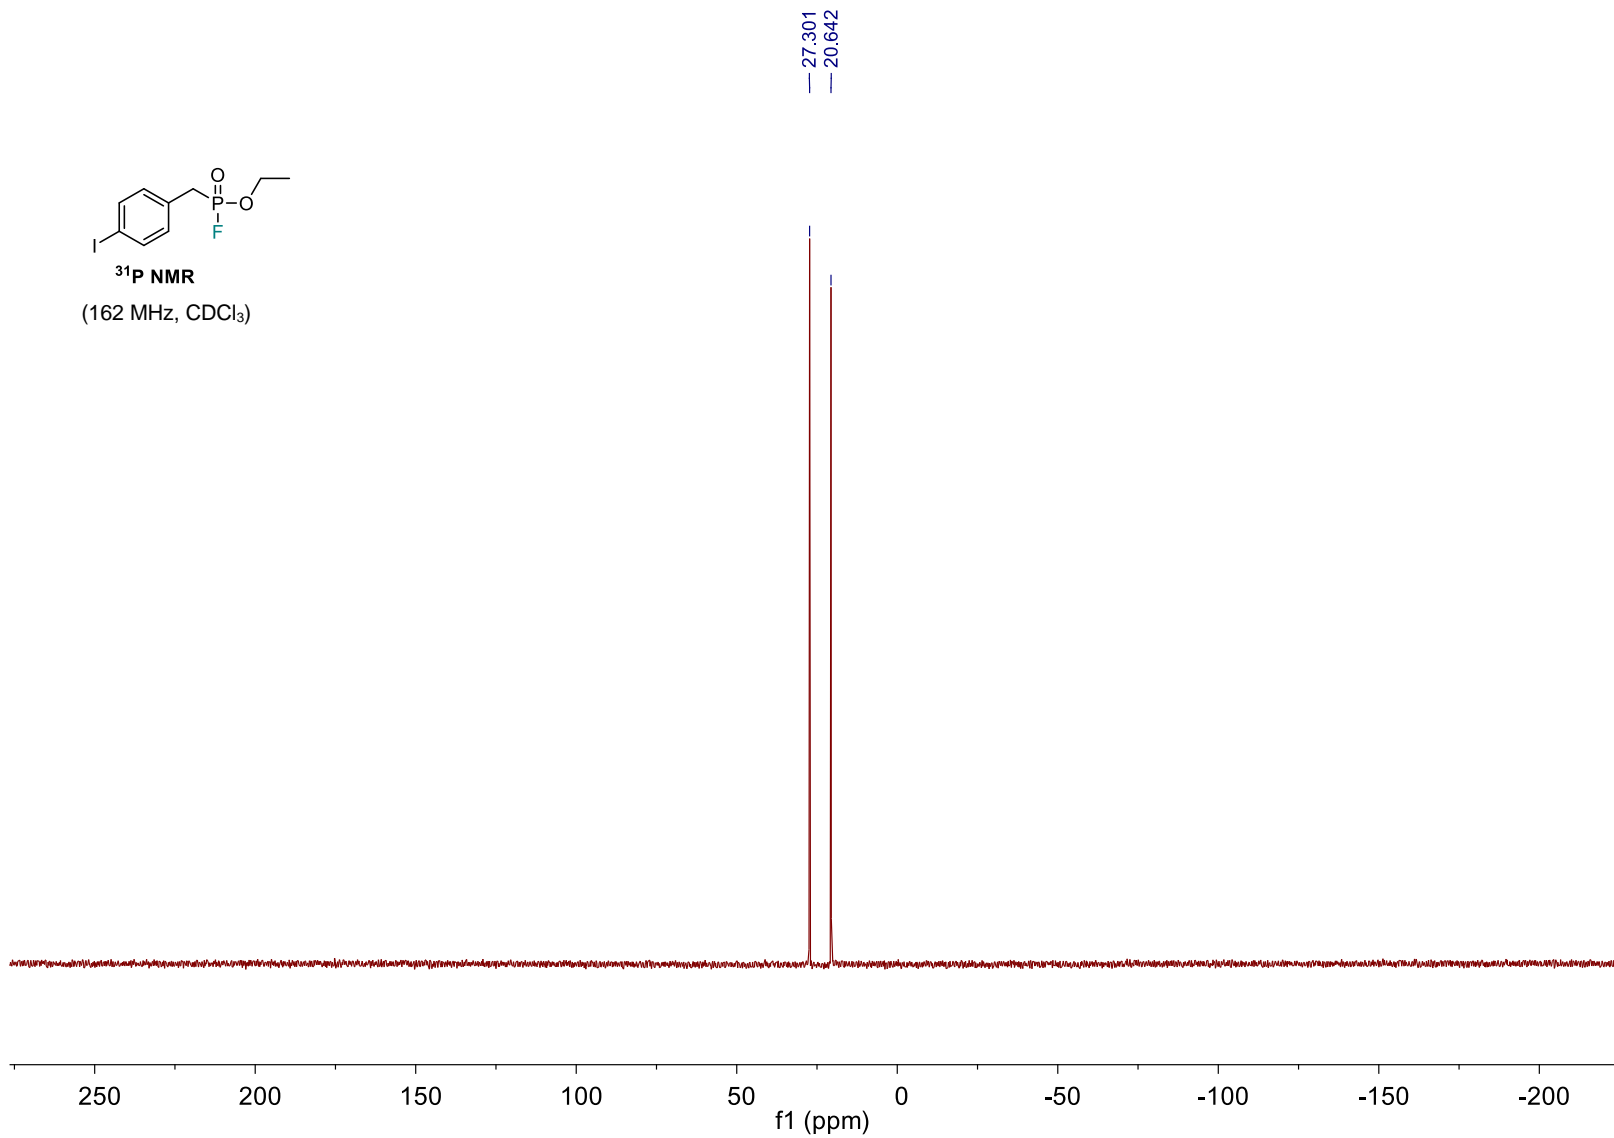

S267

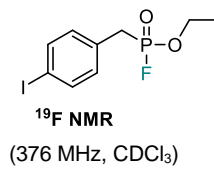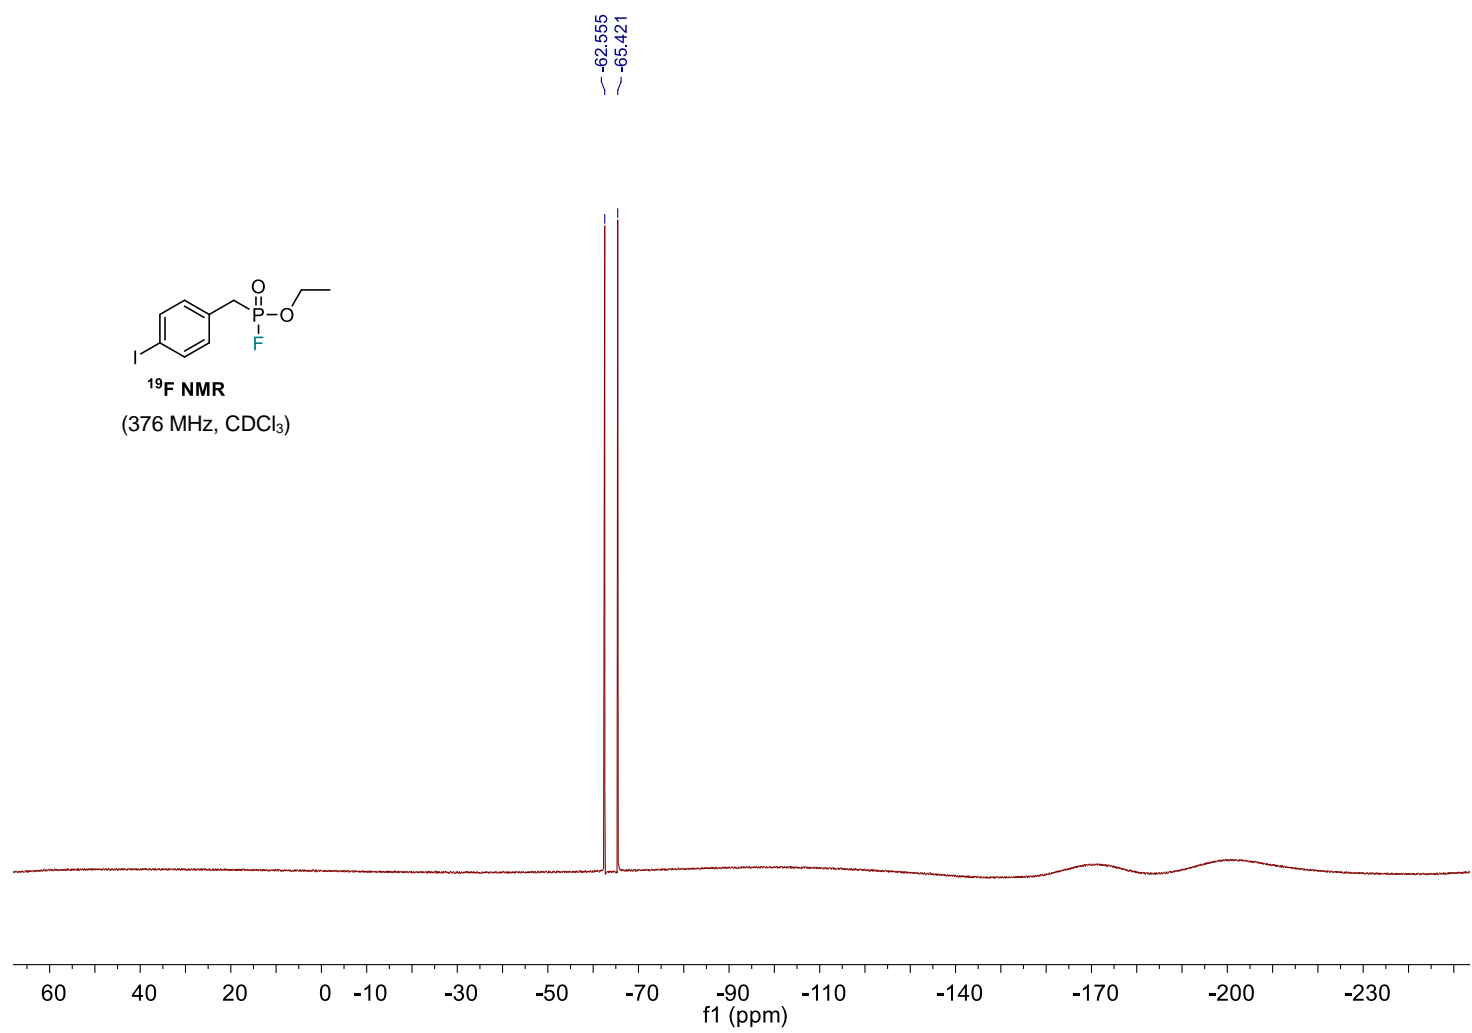

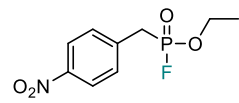

**<sup>1</sup>H NMR**  
(400 MHz, CDCl<sub>3</sub>)

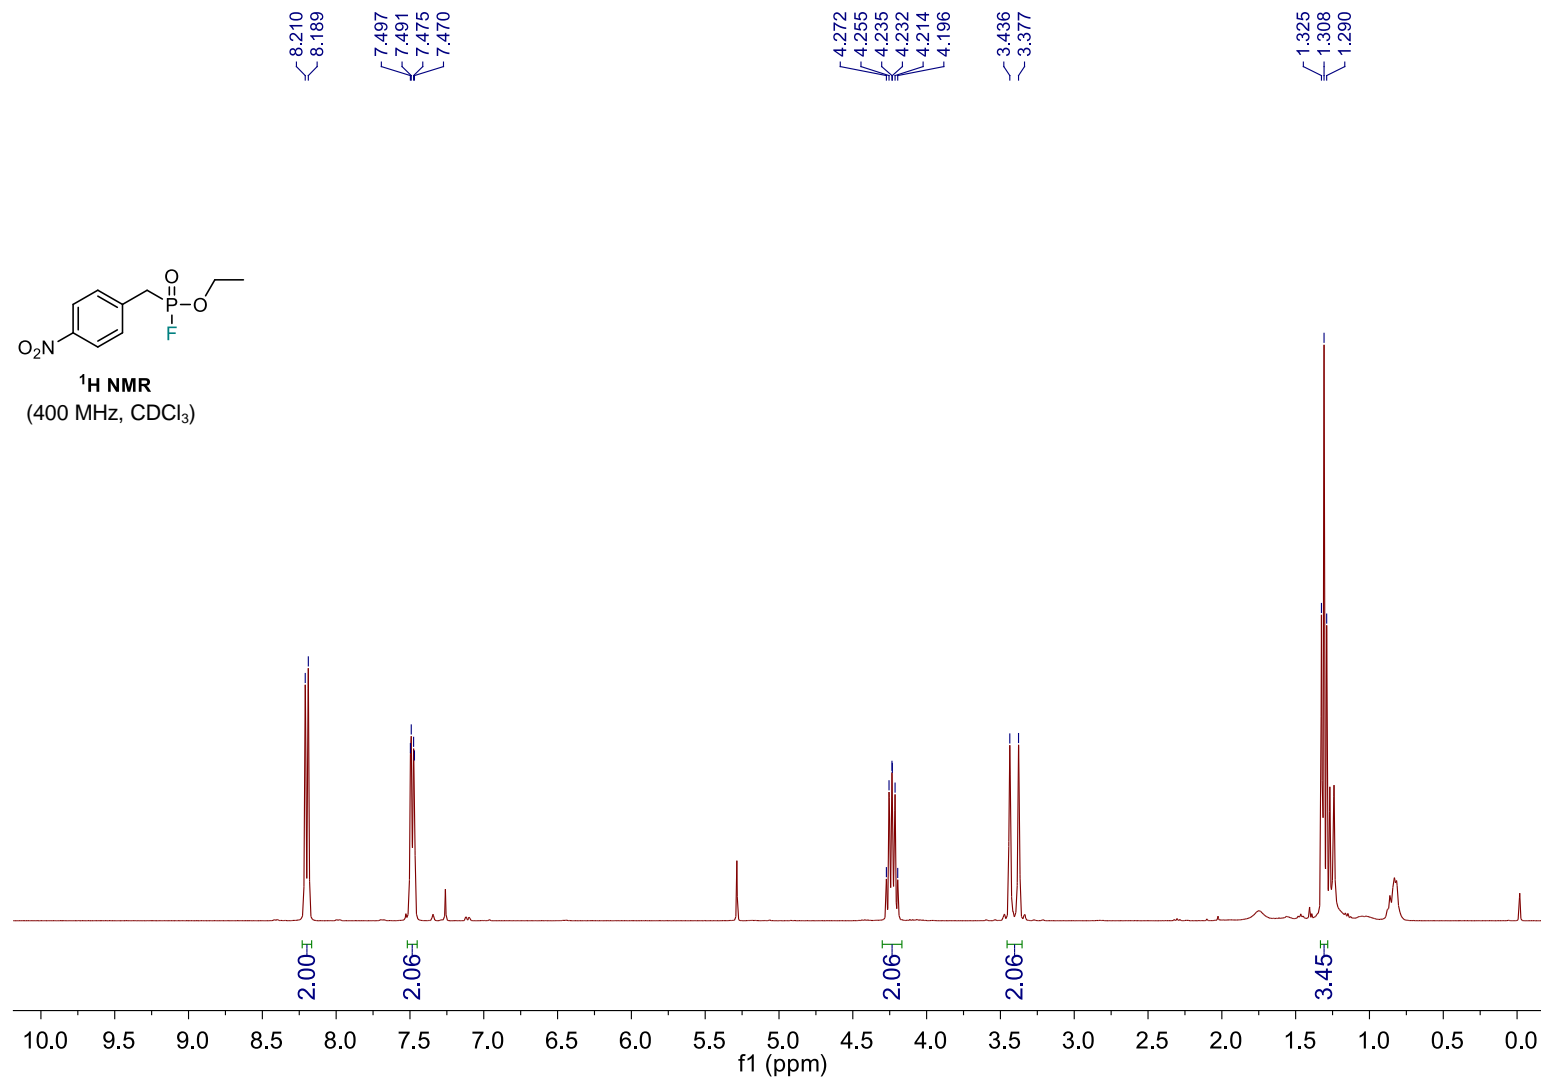

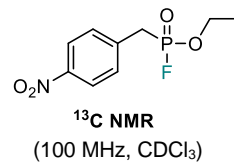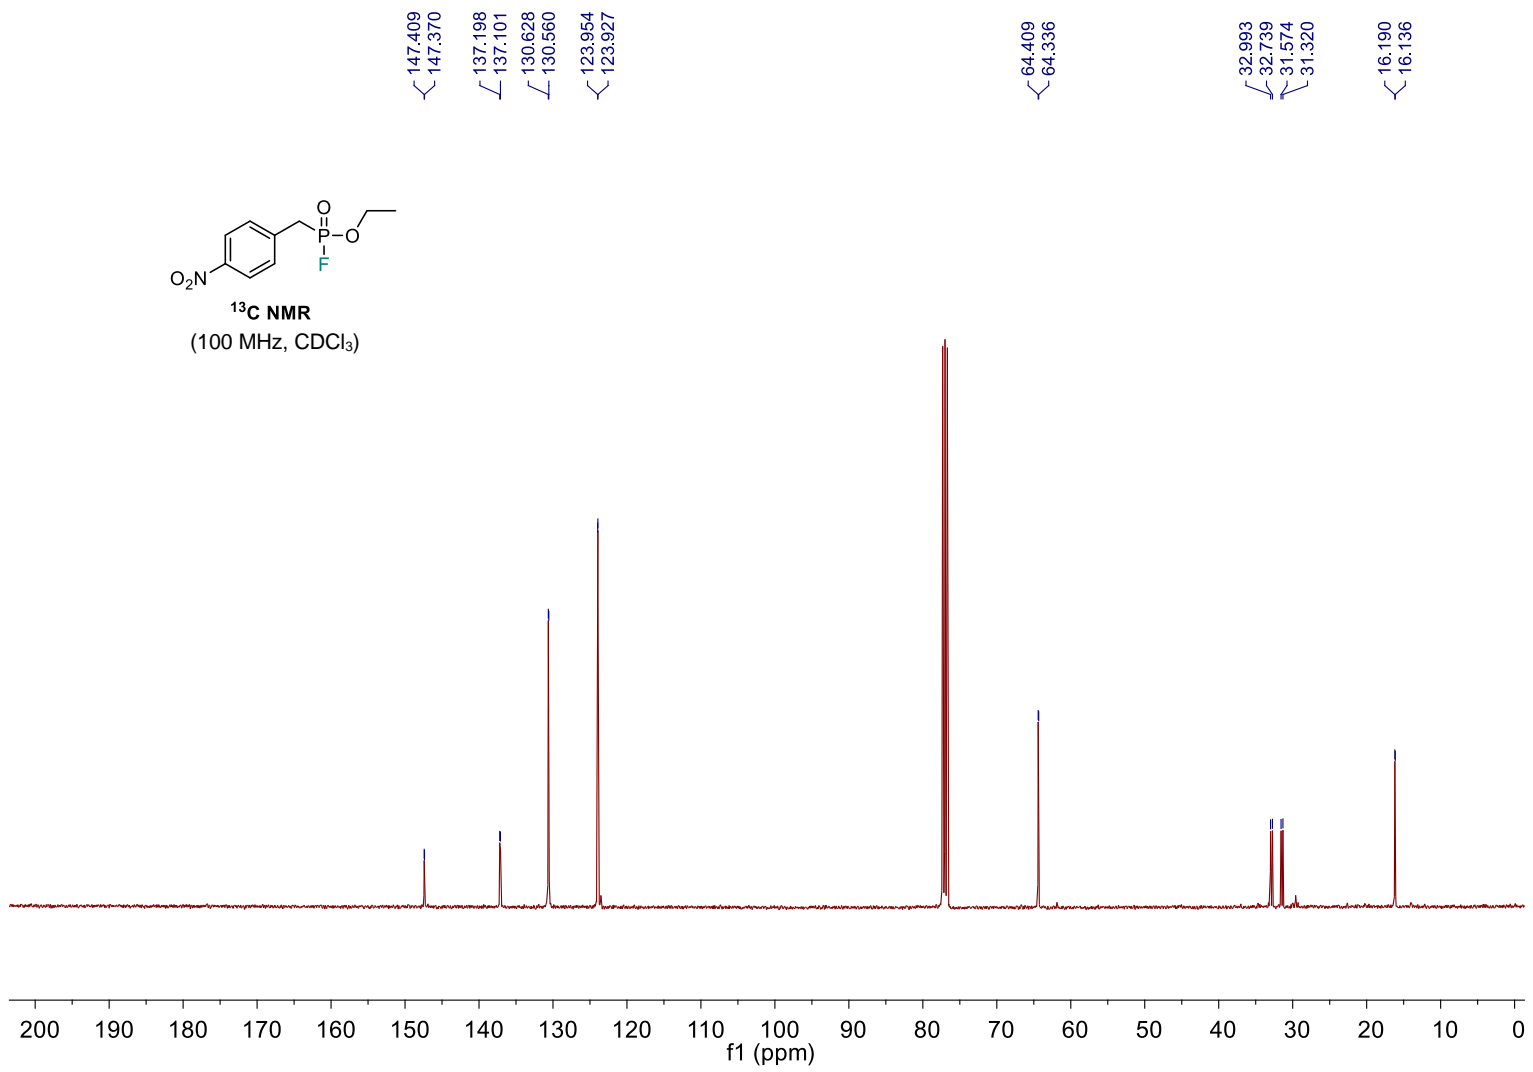

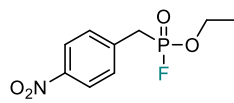

<sup>31</sup>P NMR  
(162 MHz, CDCl<sub>3</sub>)

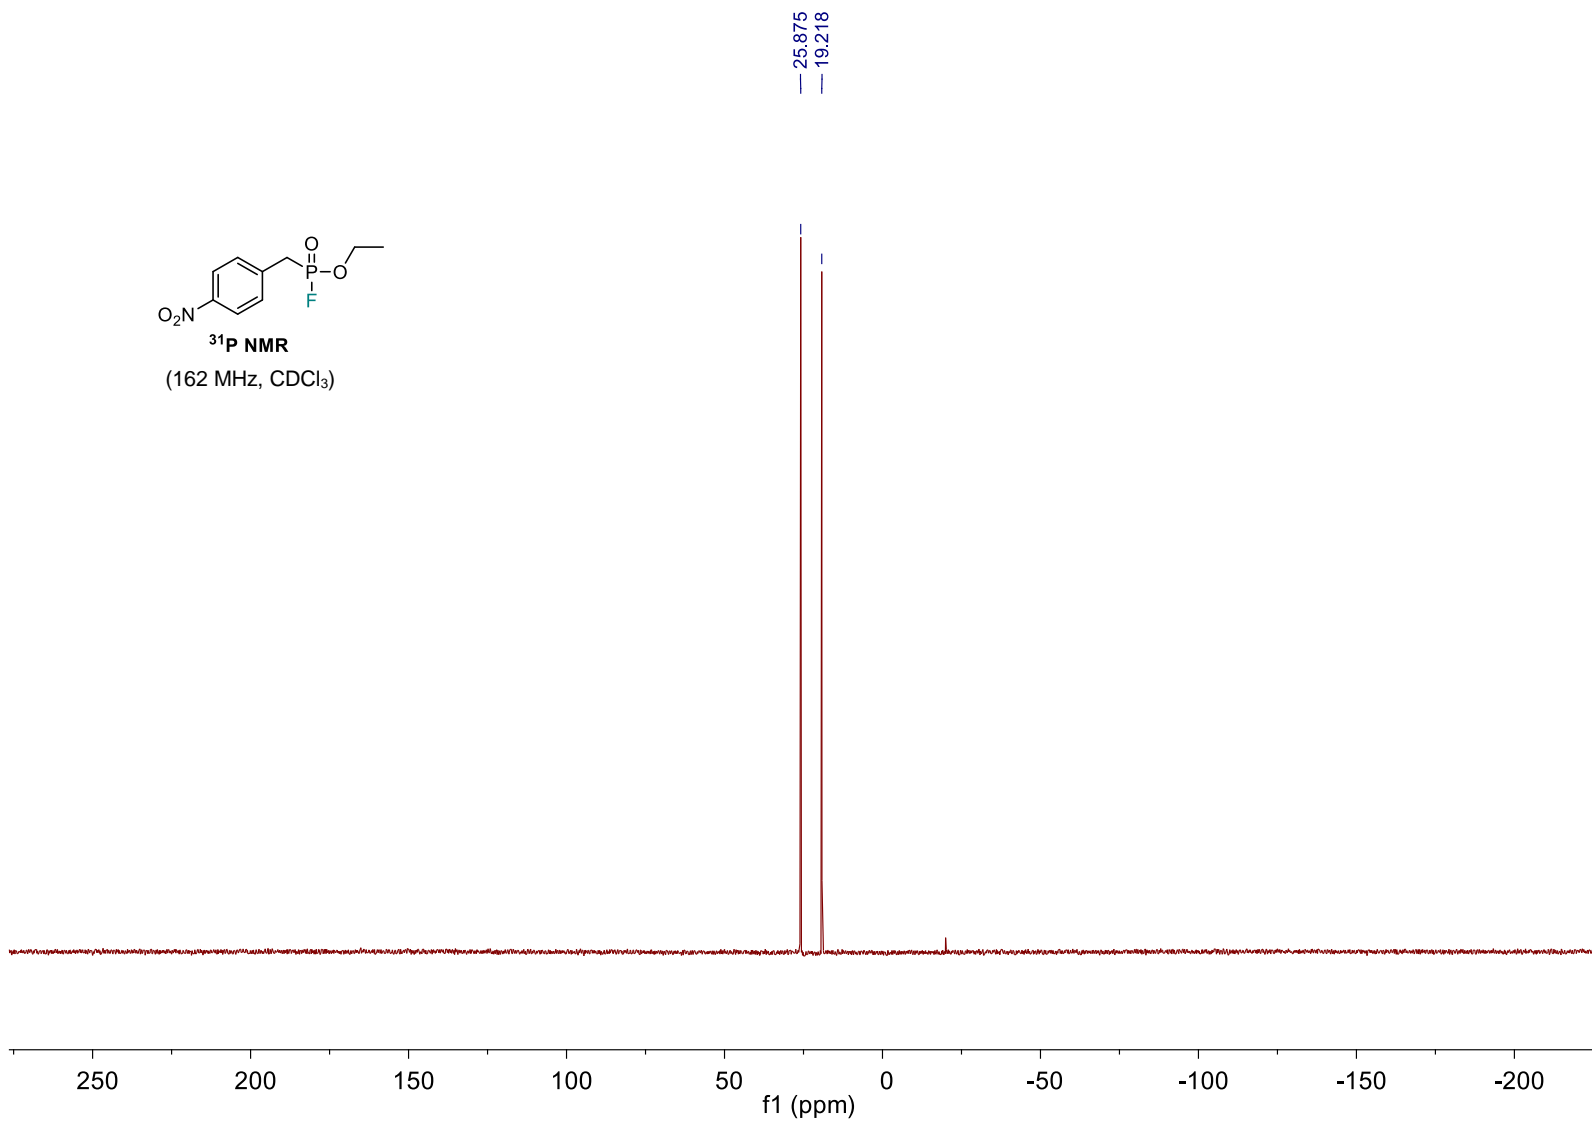

S271

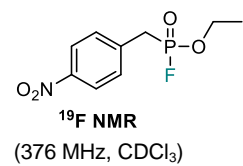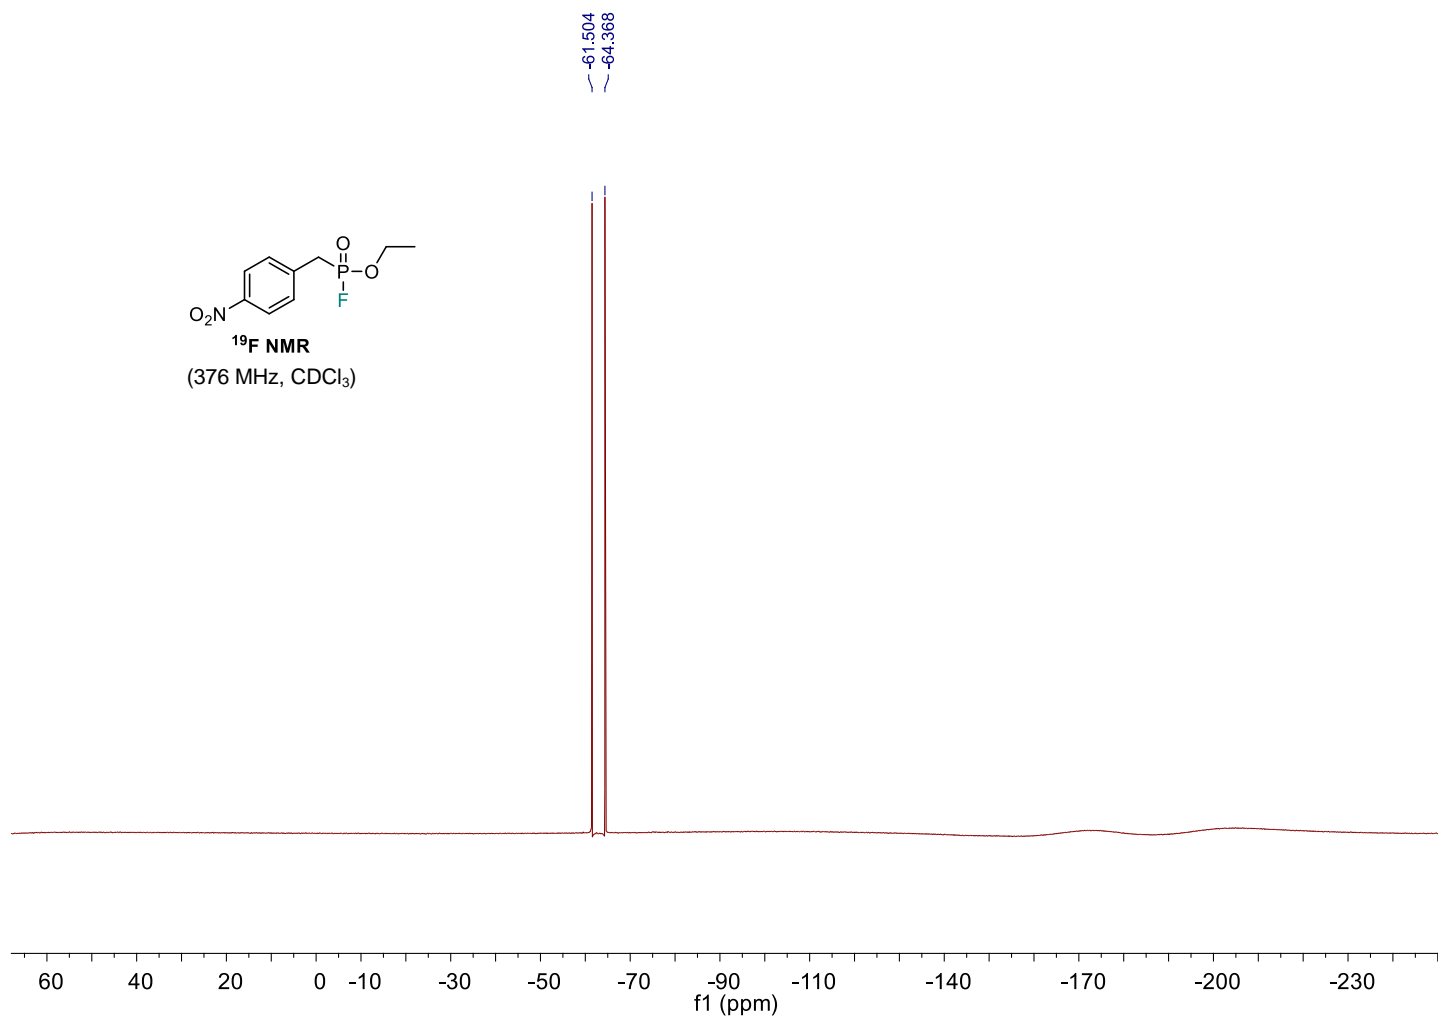



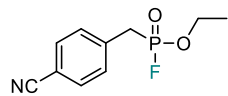

<sup>1</sup>H NMR  
(400 MHz, CDCl<sub>3</sub>)

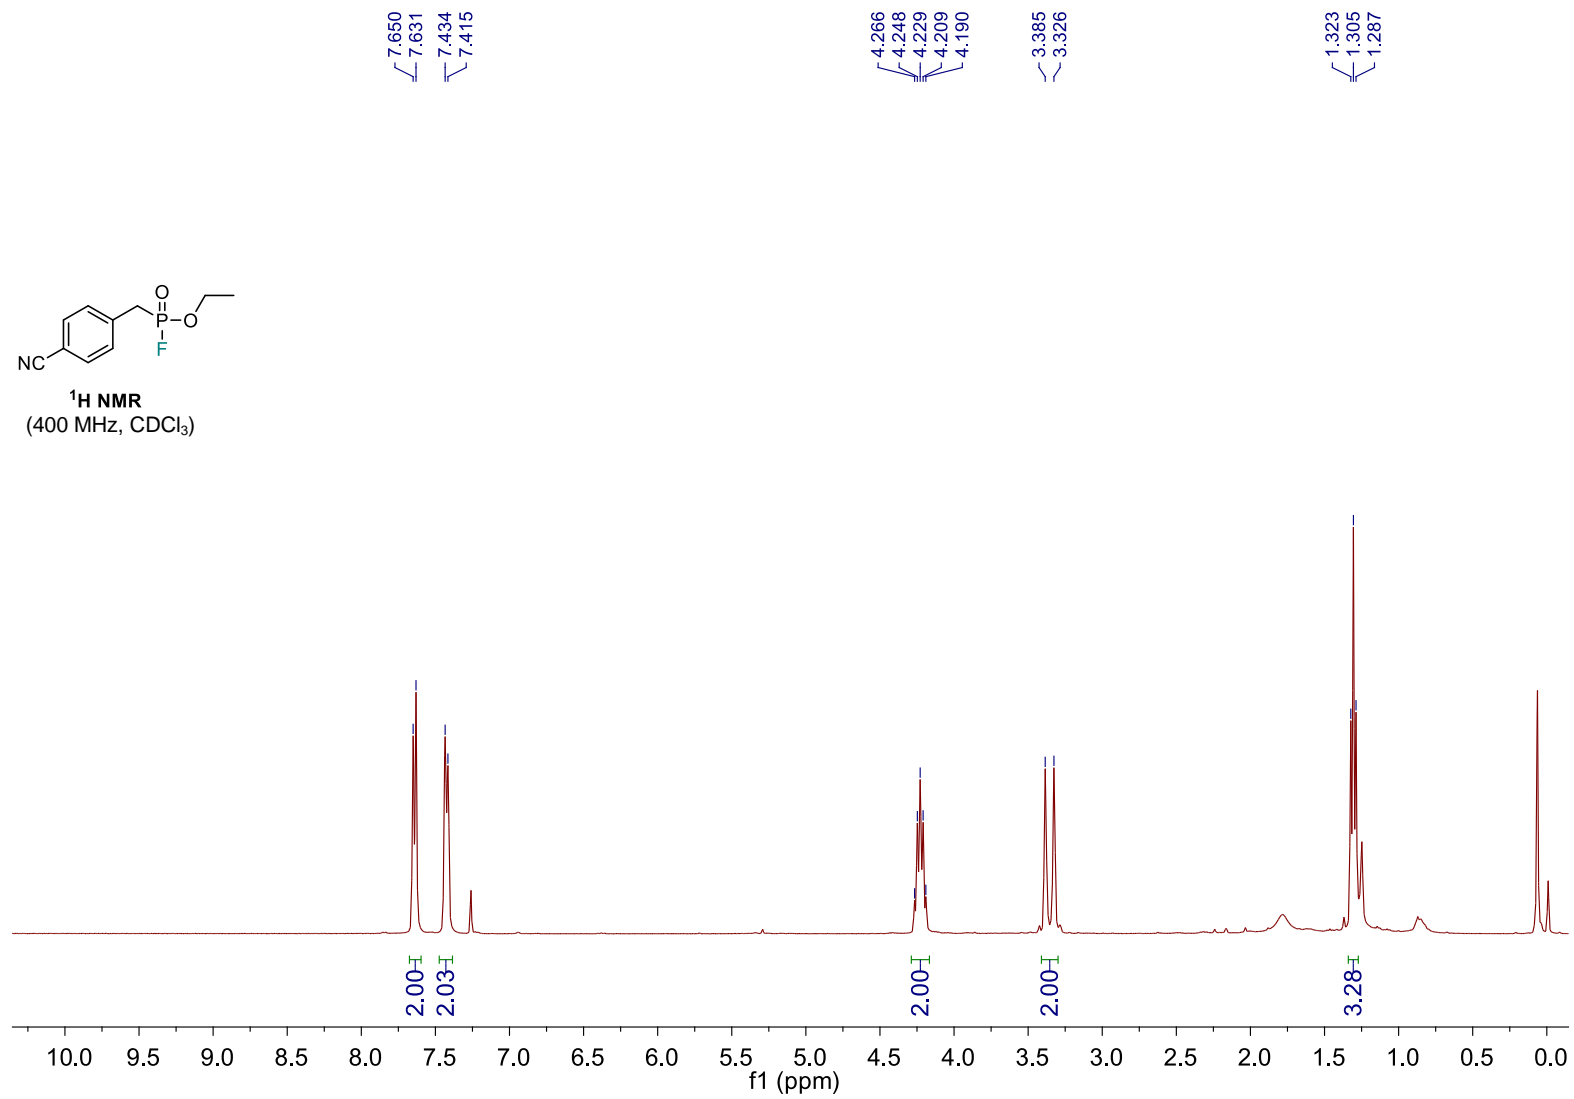

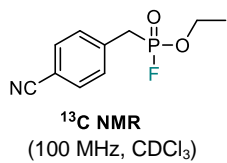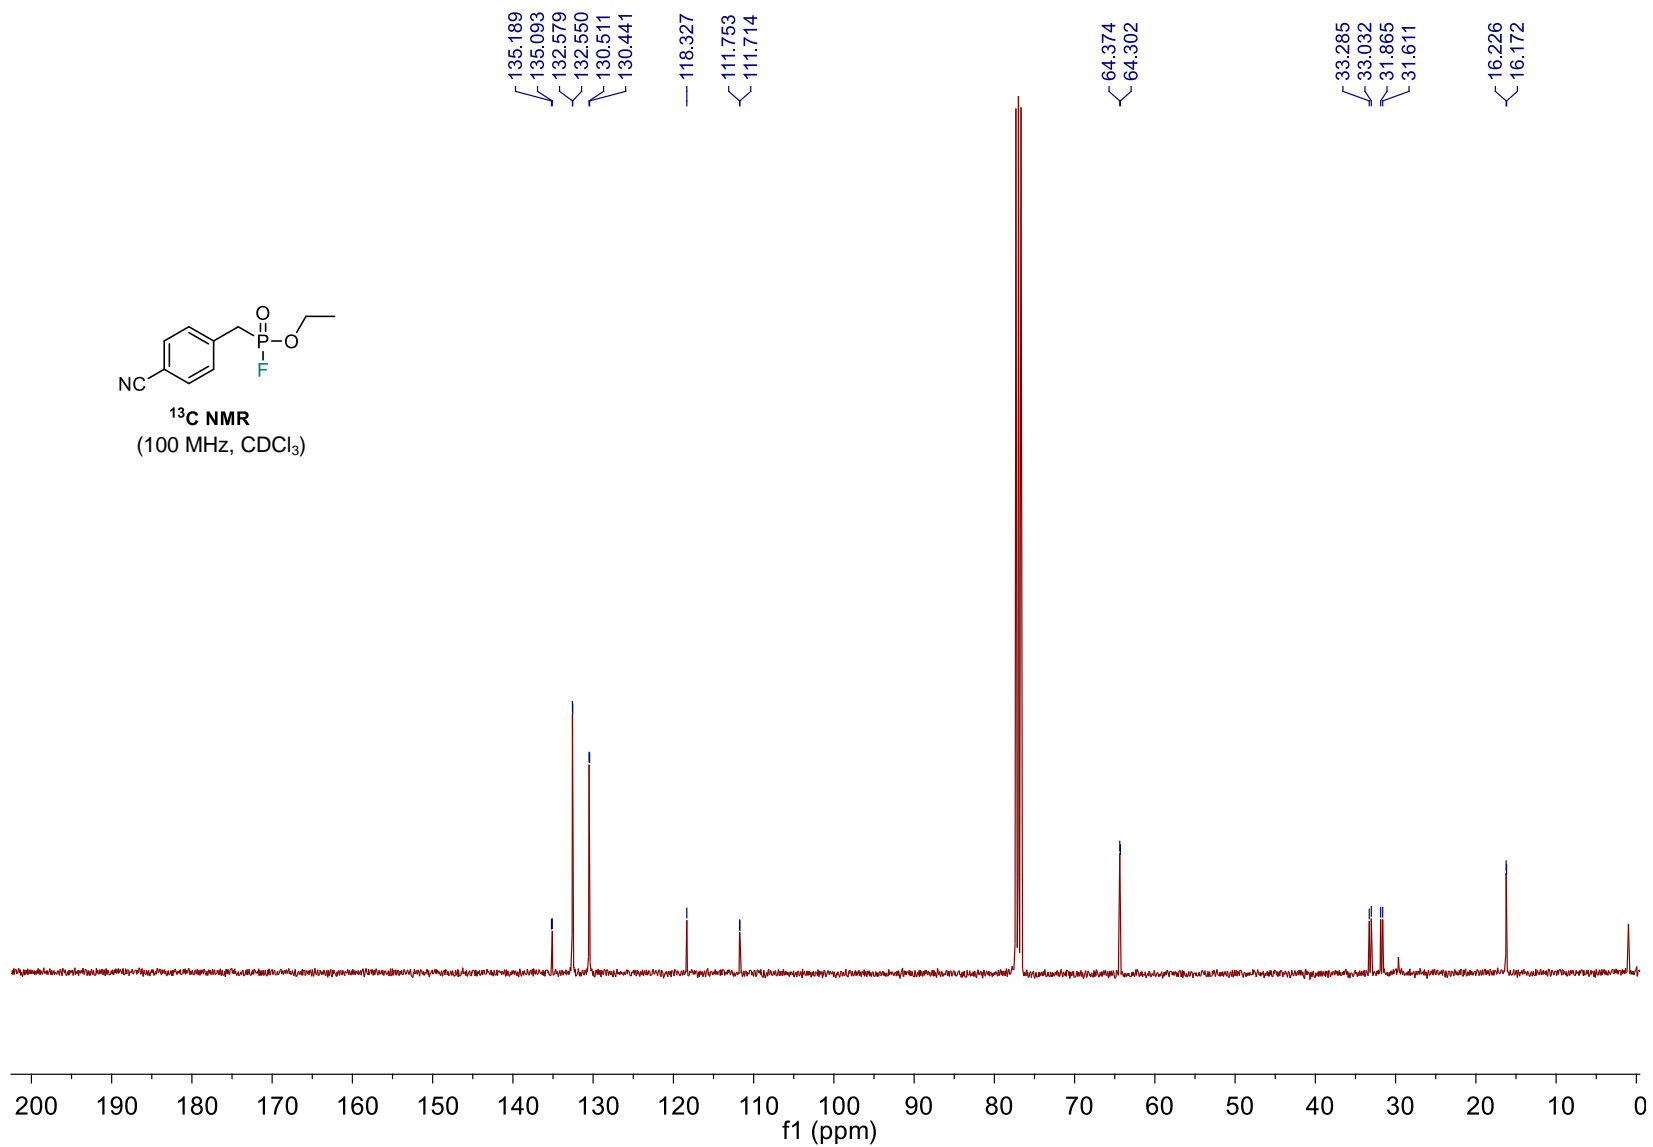

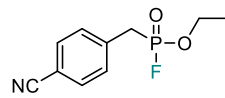

**<sup>31</sup>P NMR**  
(162 MHz, CDCl<sub>3</sub>)

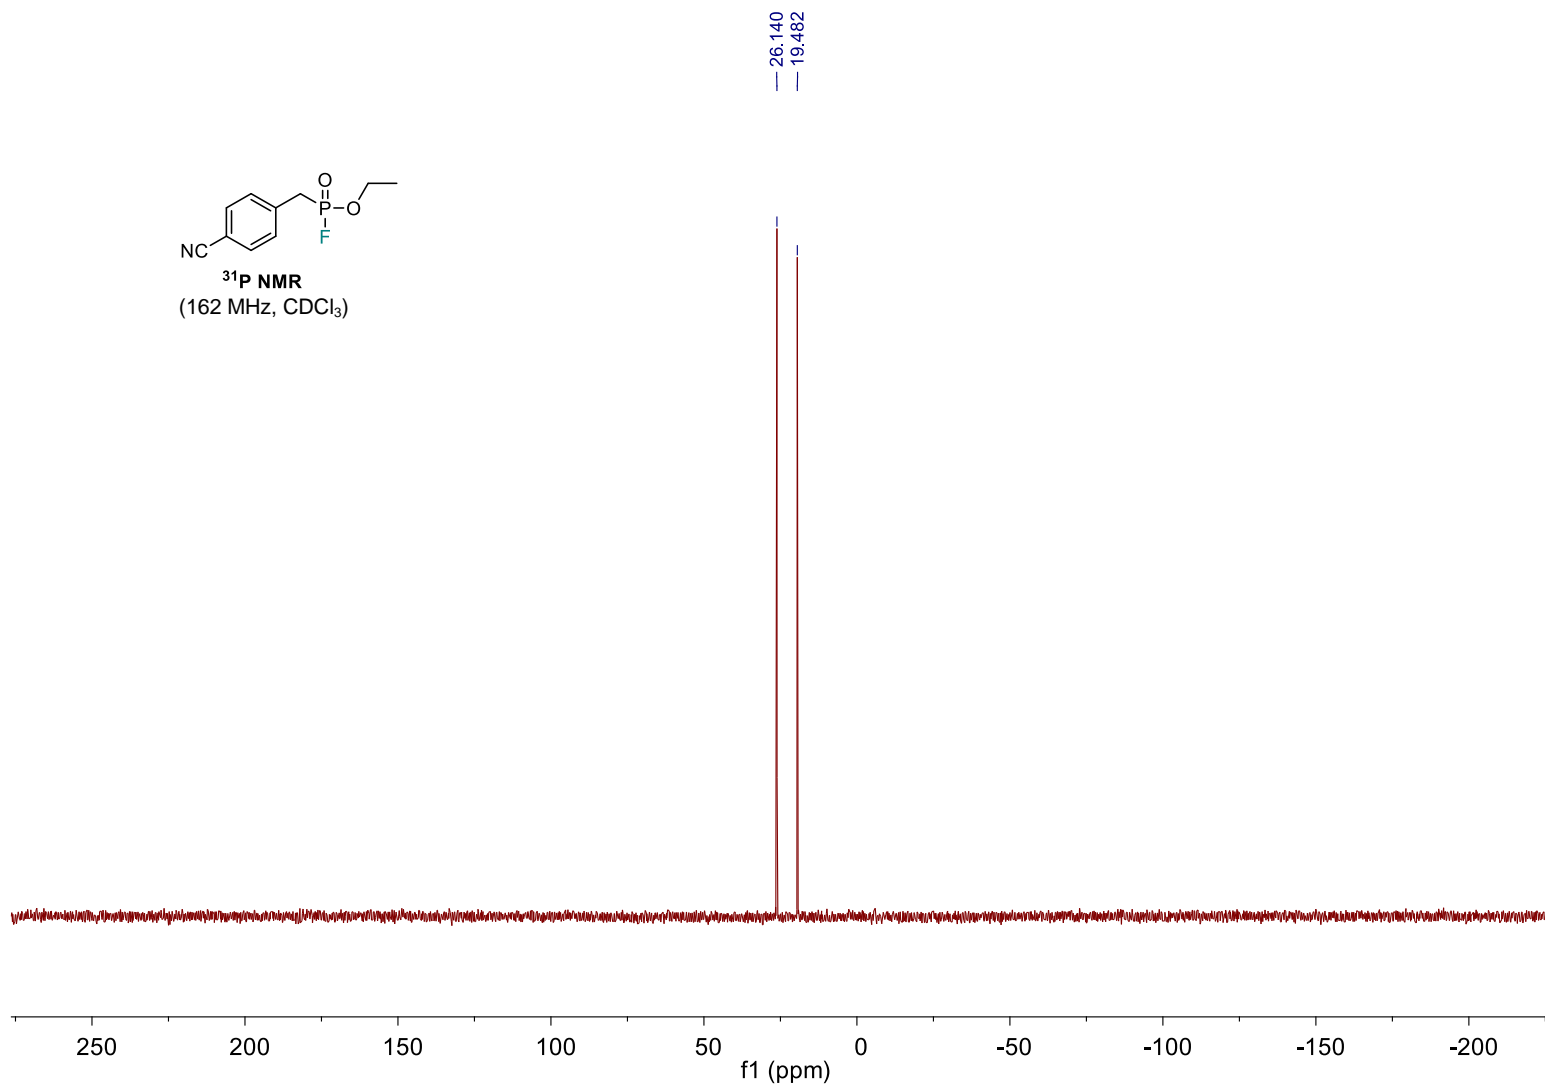

S275

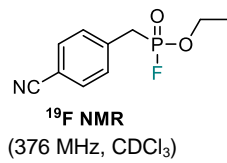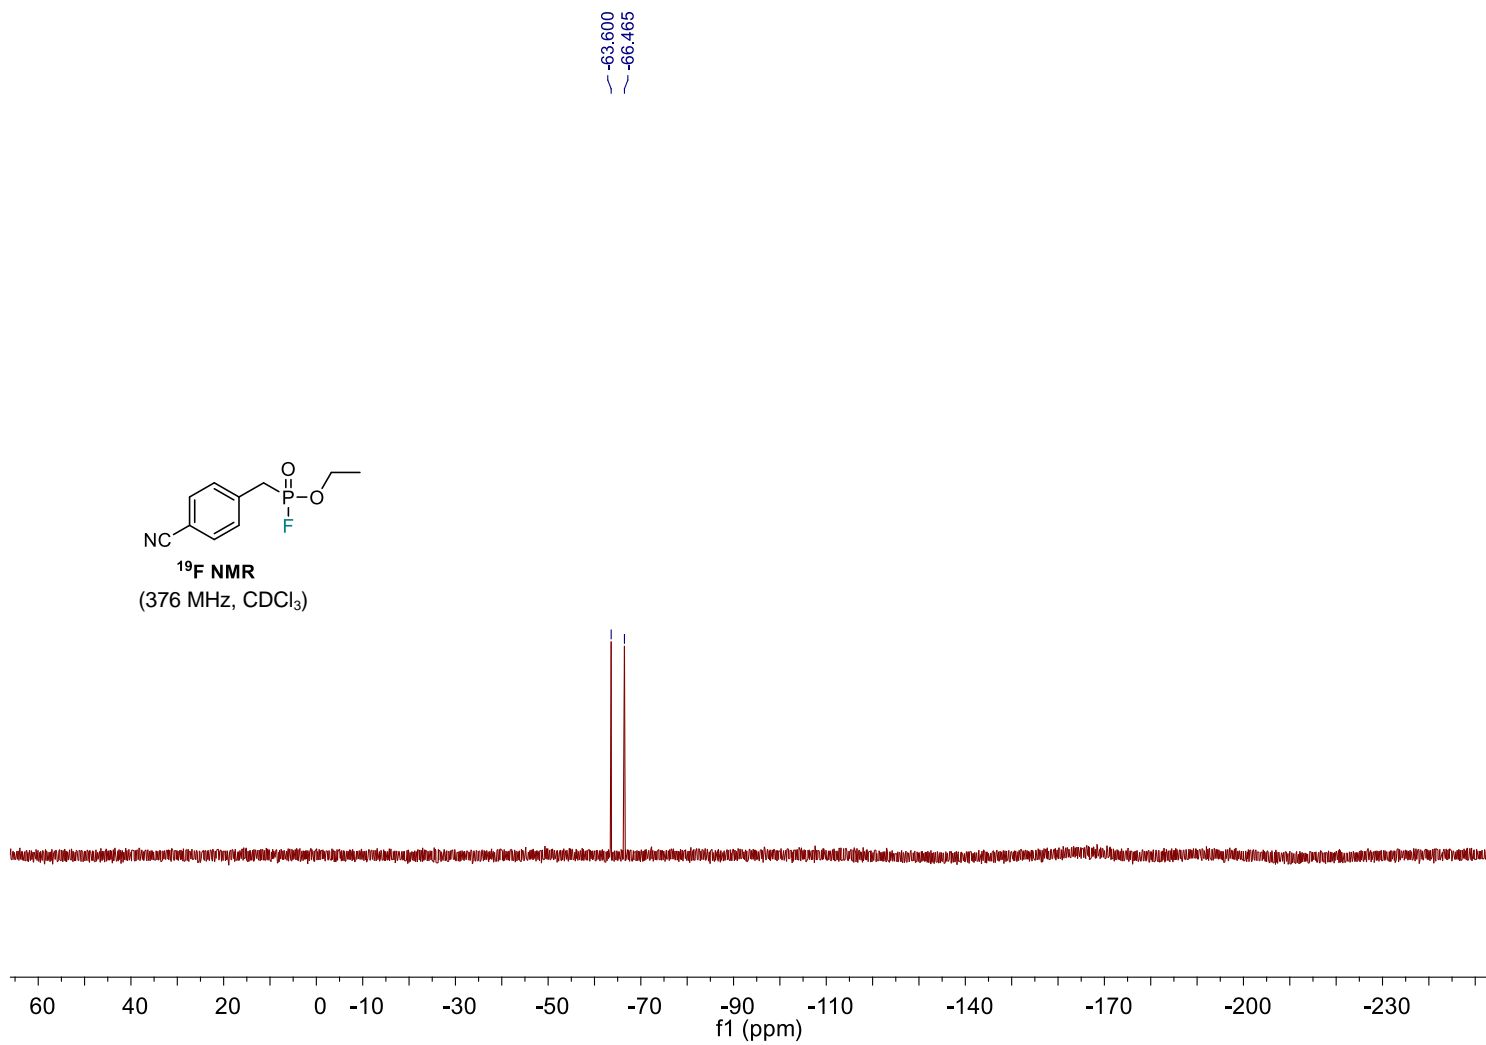

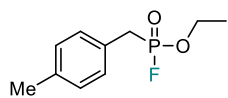

<sup>1</sup>H NMR  
(400 MHz, CDCl<sub>3</sub>)

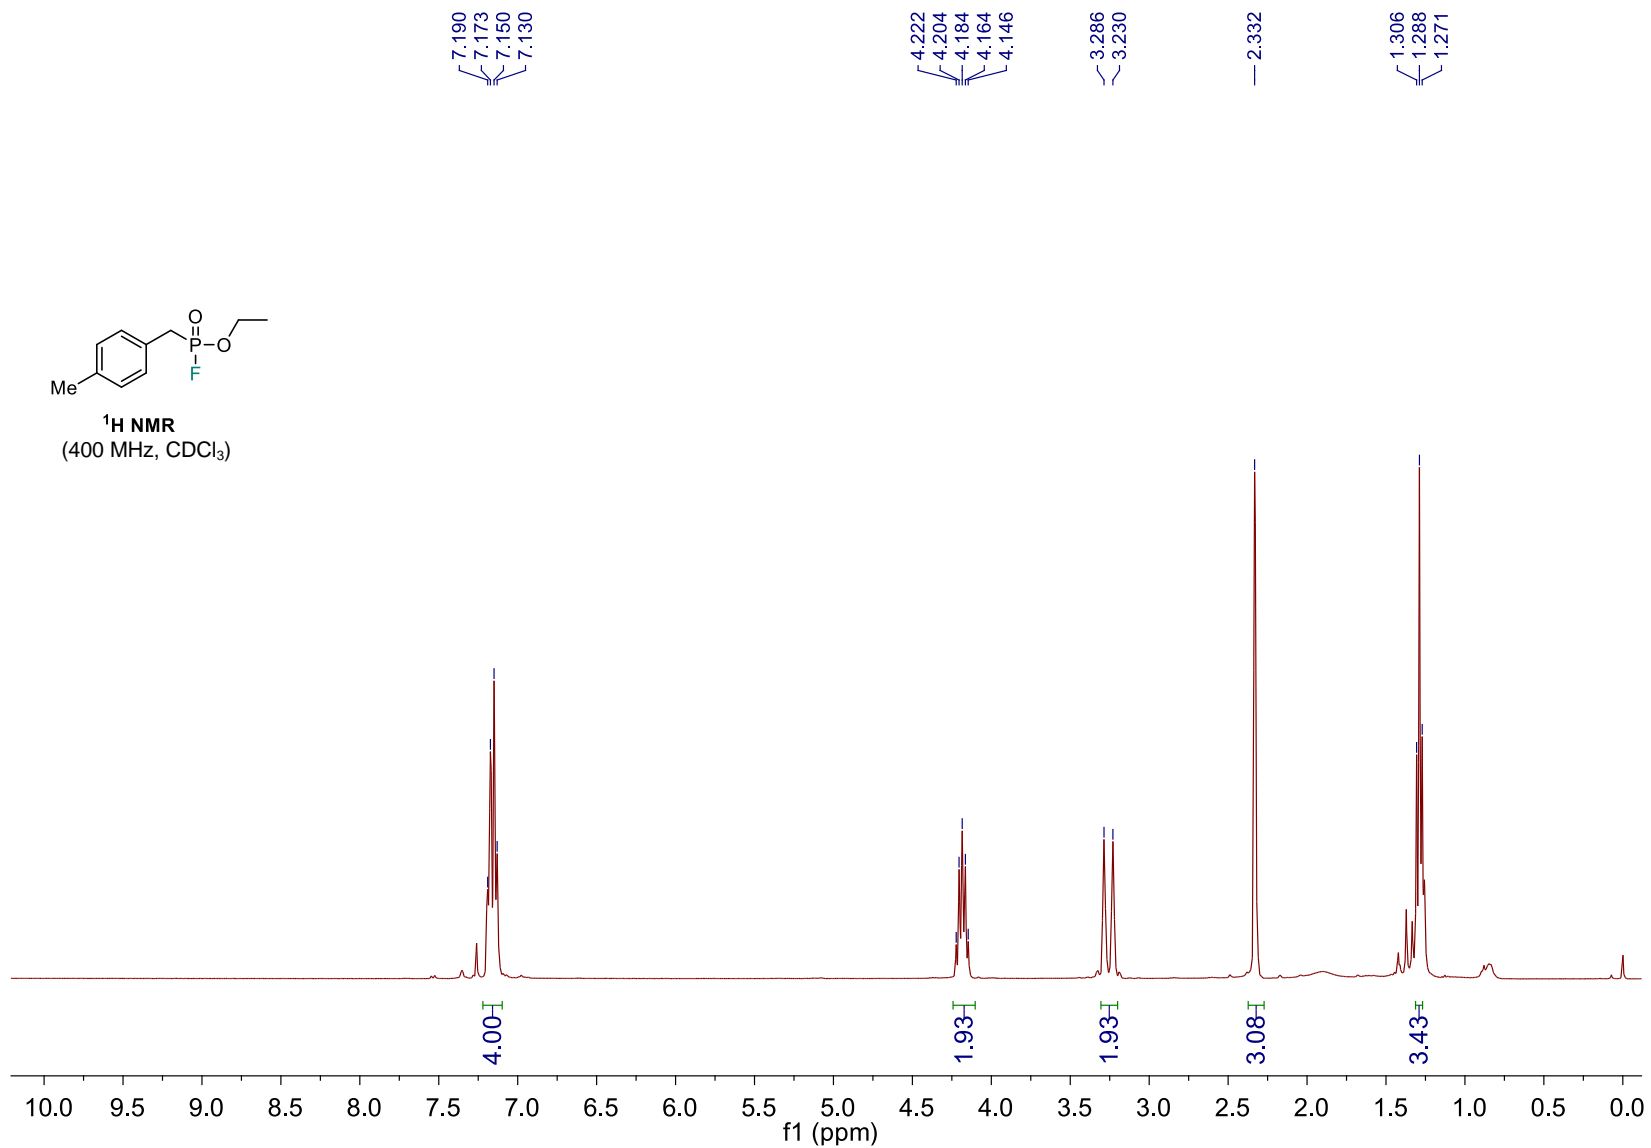

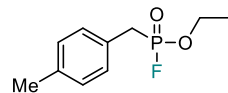

<sup>13</sup>C NMR  
(100 MHz, CDCl<sub>3</sub>)

137.226  
137.187  
129.513  
129.440  
126.207  
126.108

63.880  
63.807

32.540  
32.297  
31.123  
30.880

21.018  
16.217  
16.163

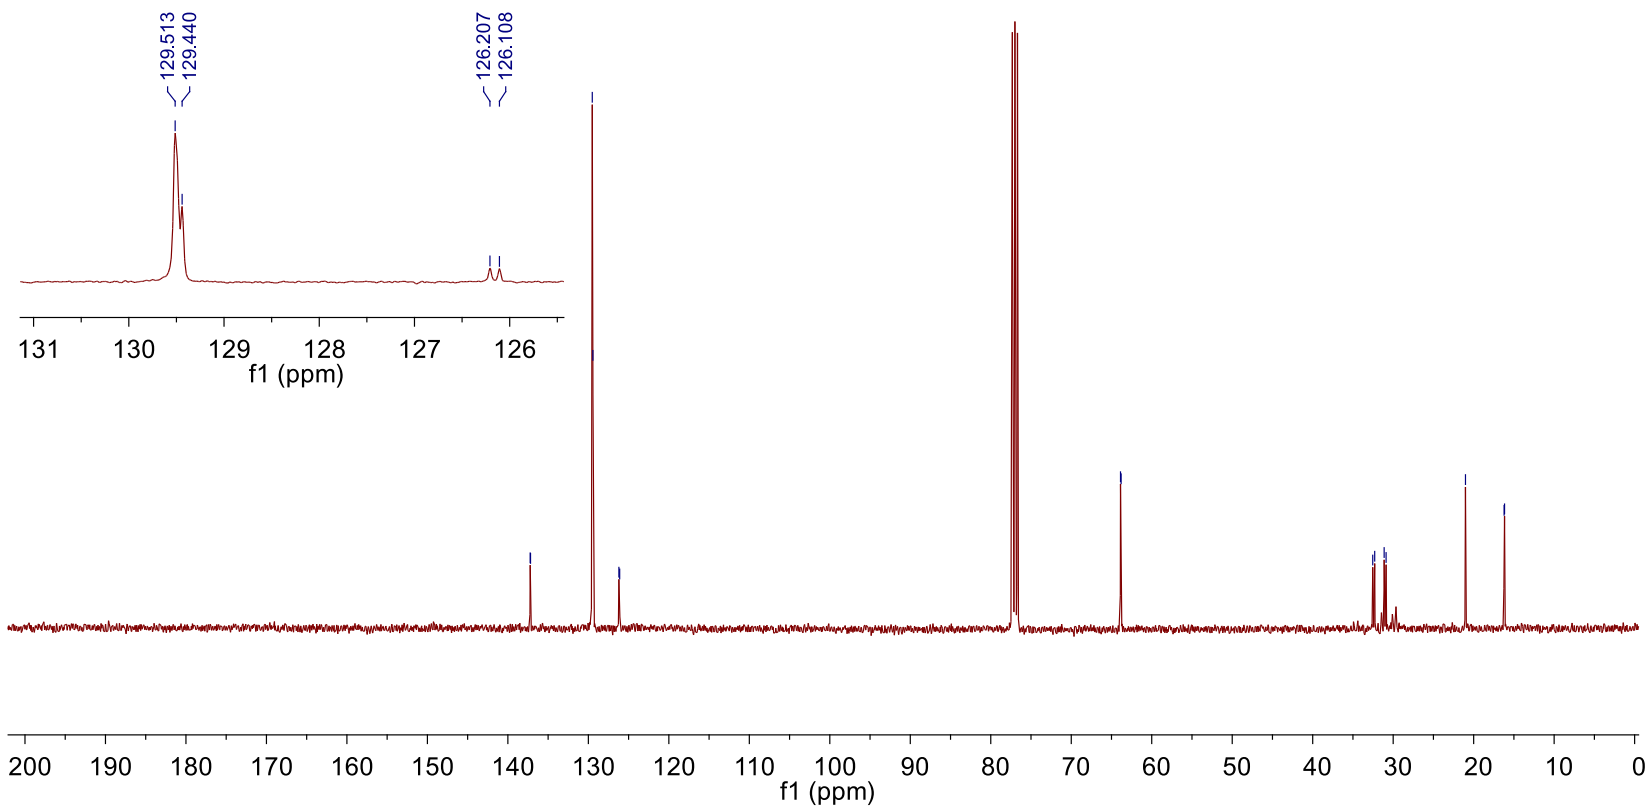

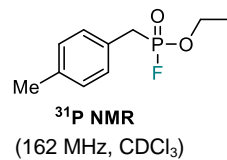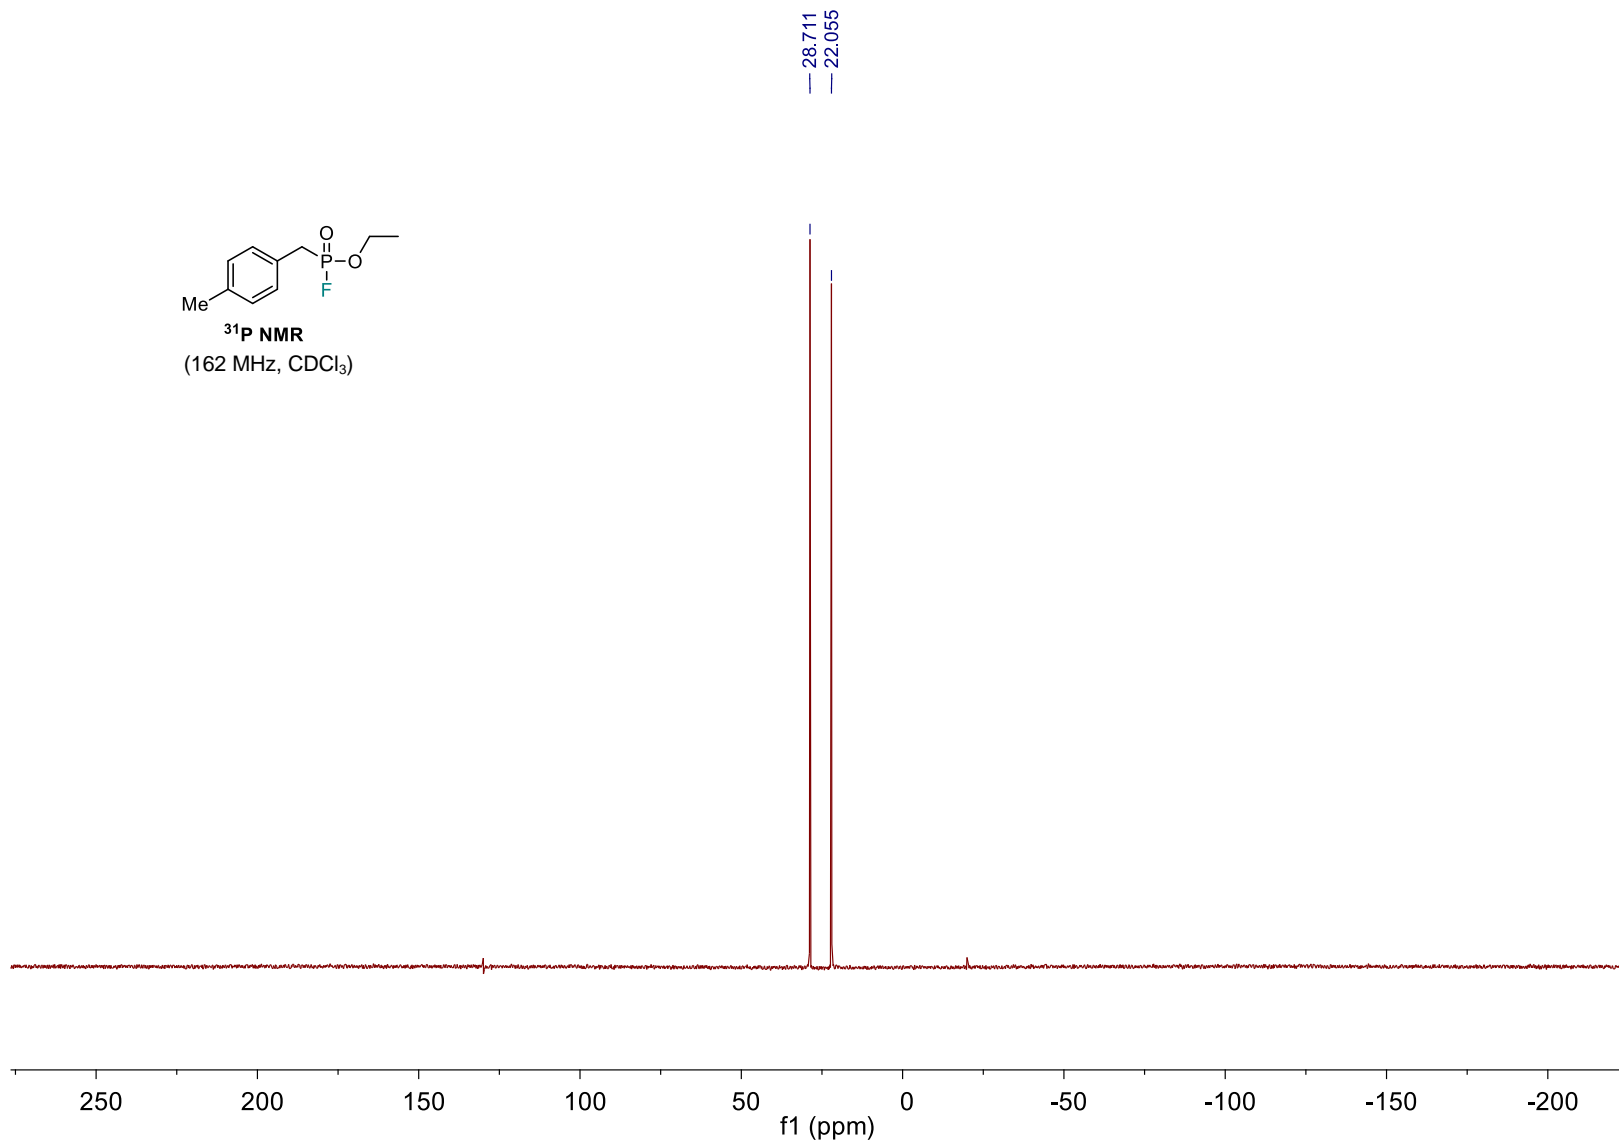

S279

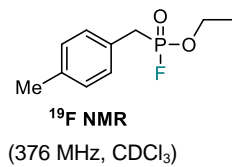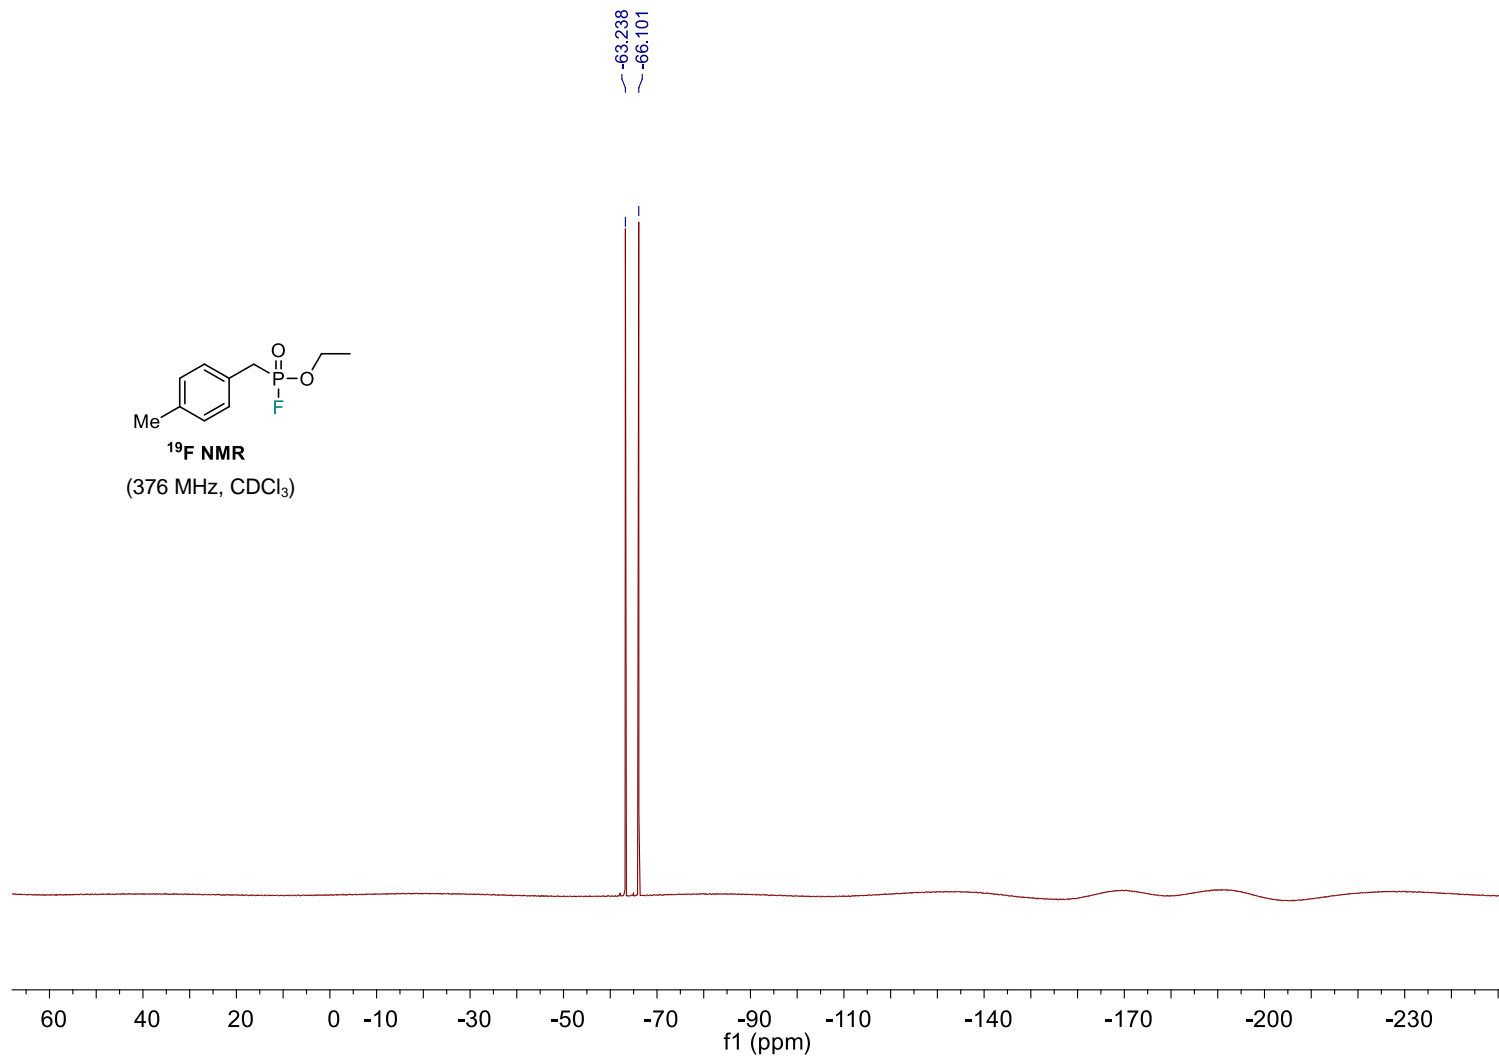



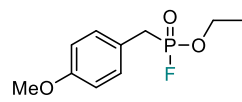

**<sup>1</sup>H NMR**  
(400 MHz, CDCl<sub>3</sub>)

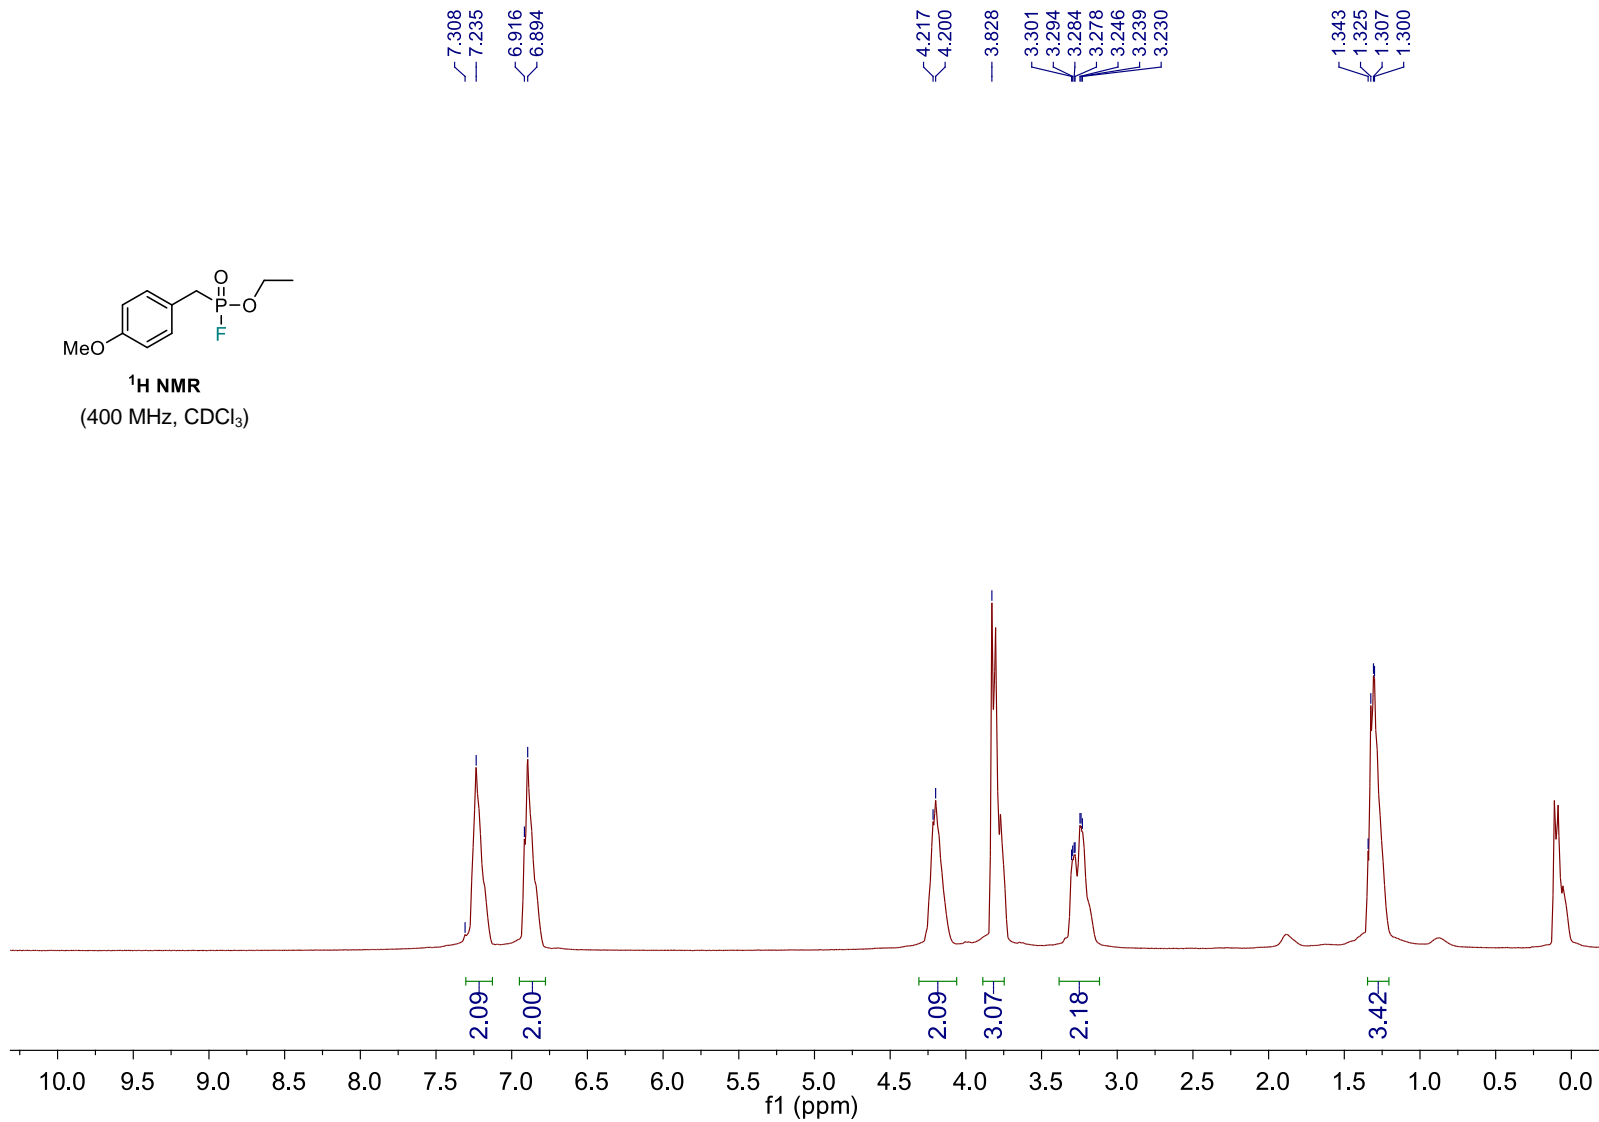

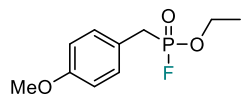

**<sup>13</sup>C NMR**  
(100 MHz, CDCl<sub>3</sub>)

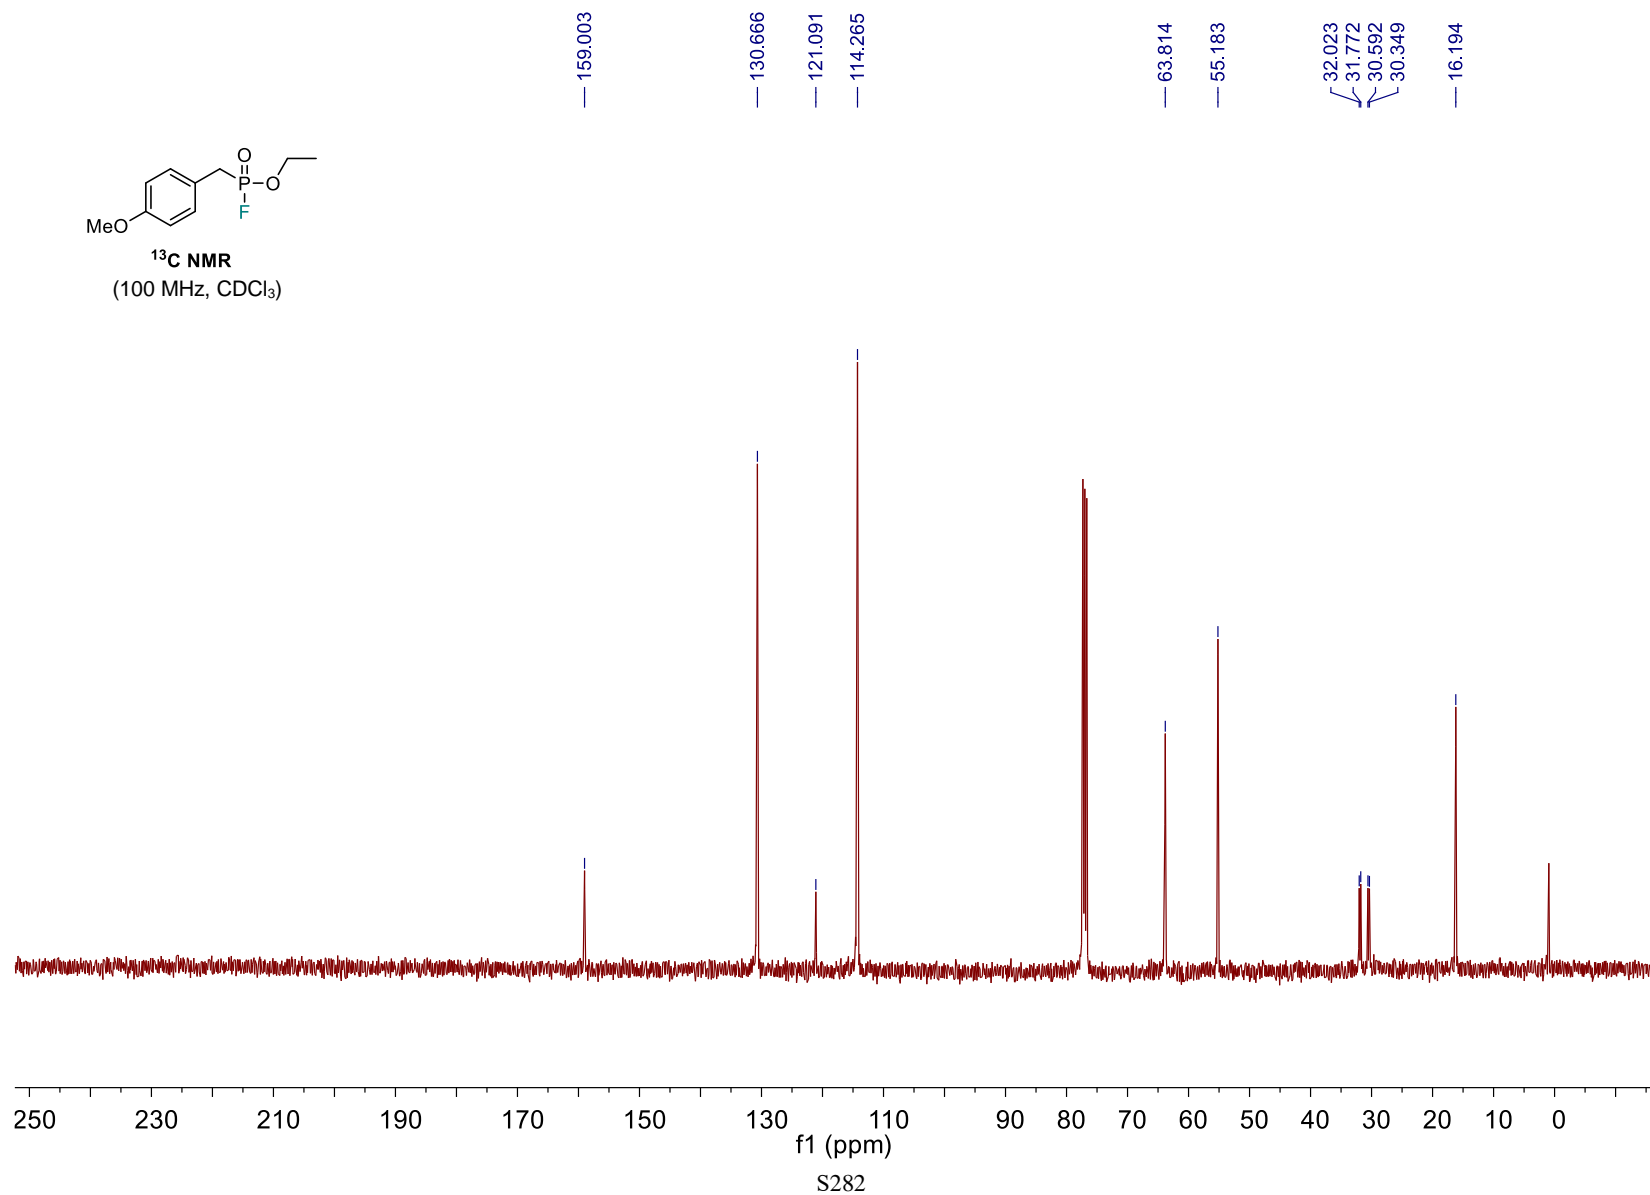

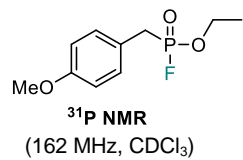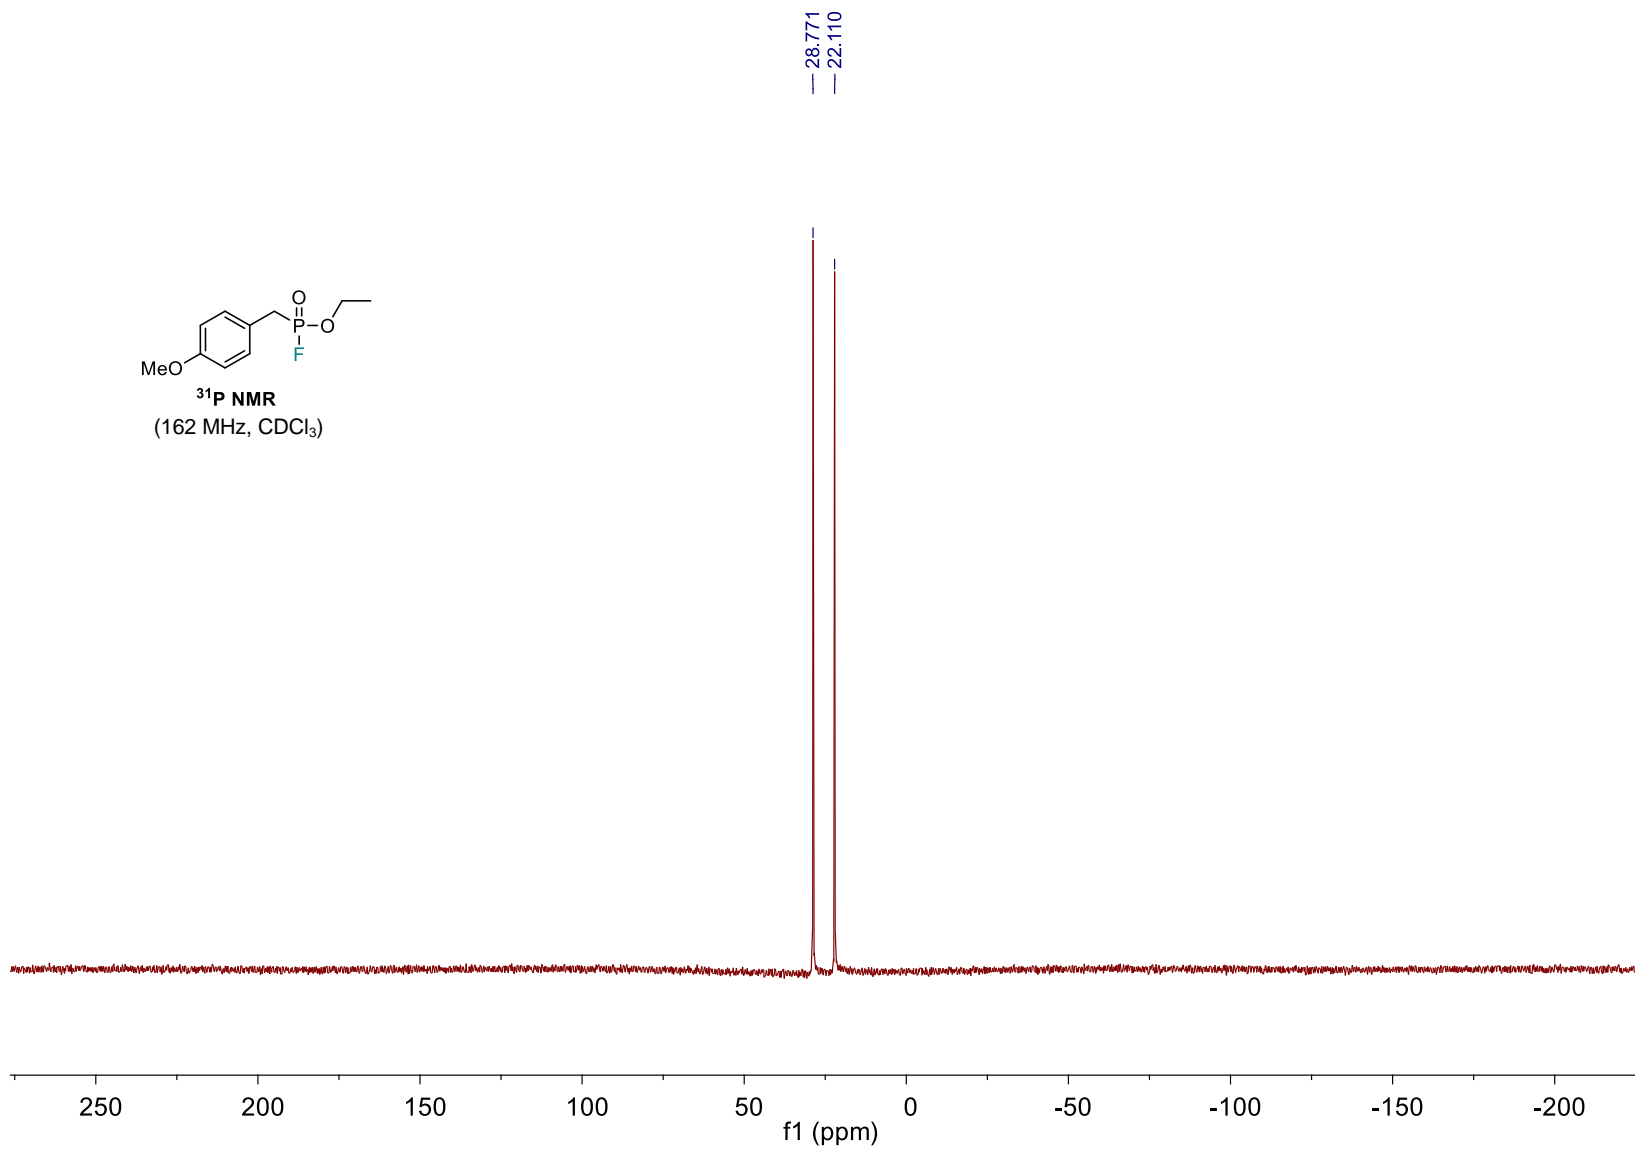

S283

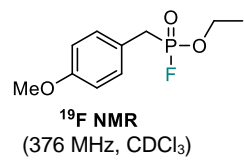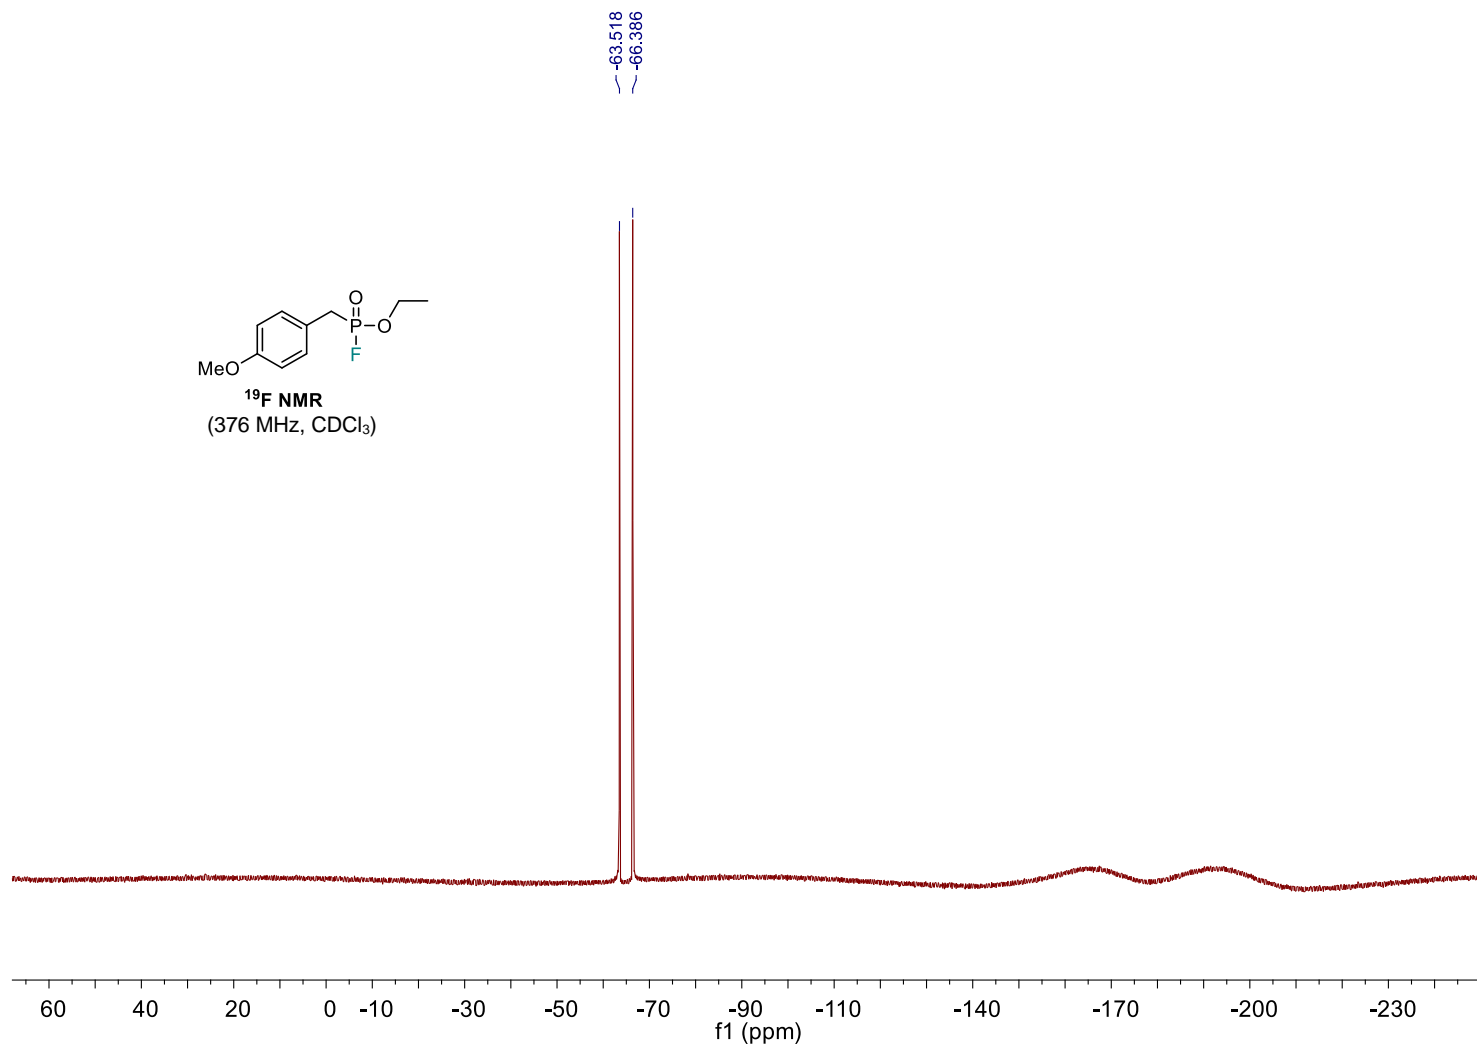

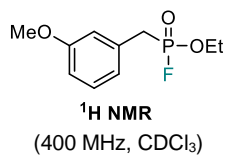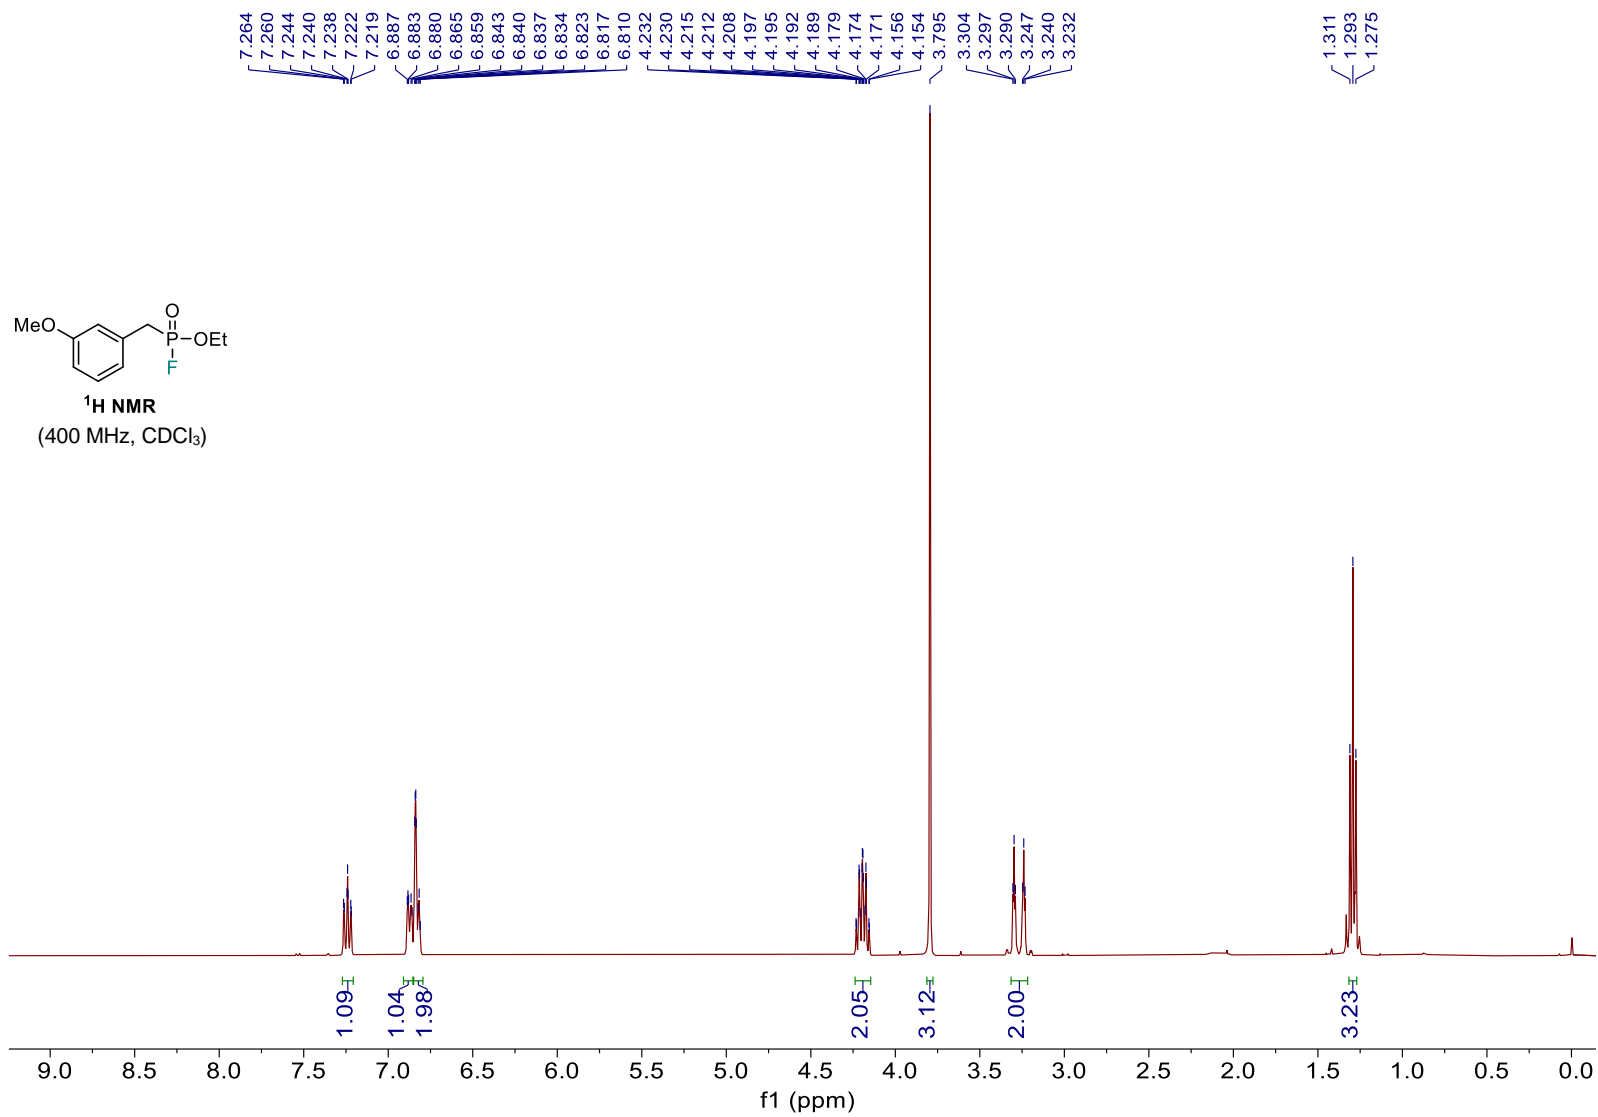

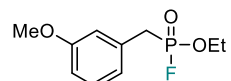

<sup>13</sup>C NMR  
(100 MHz, CDCl<sub>3</sub>)

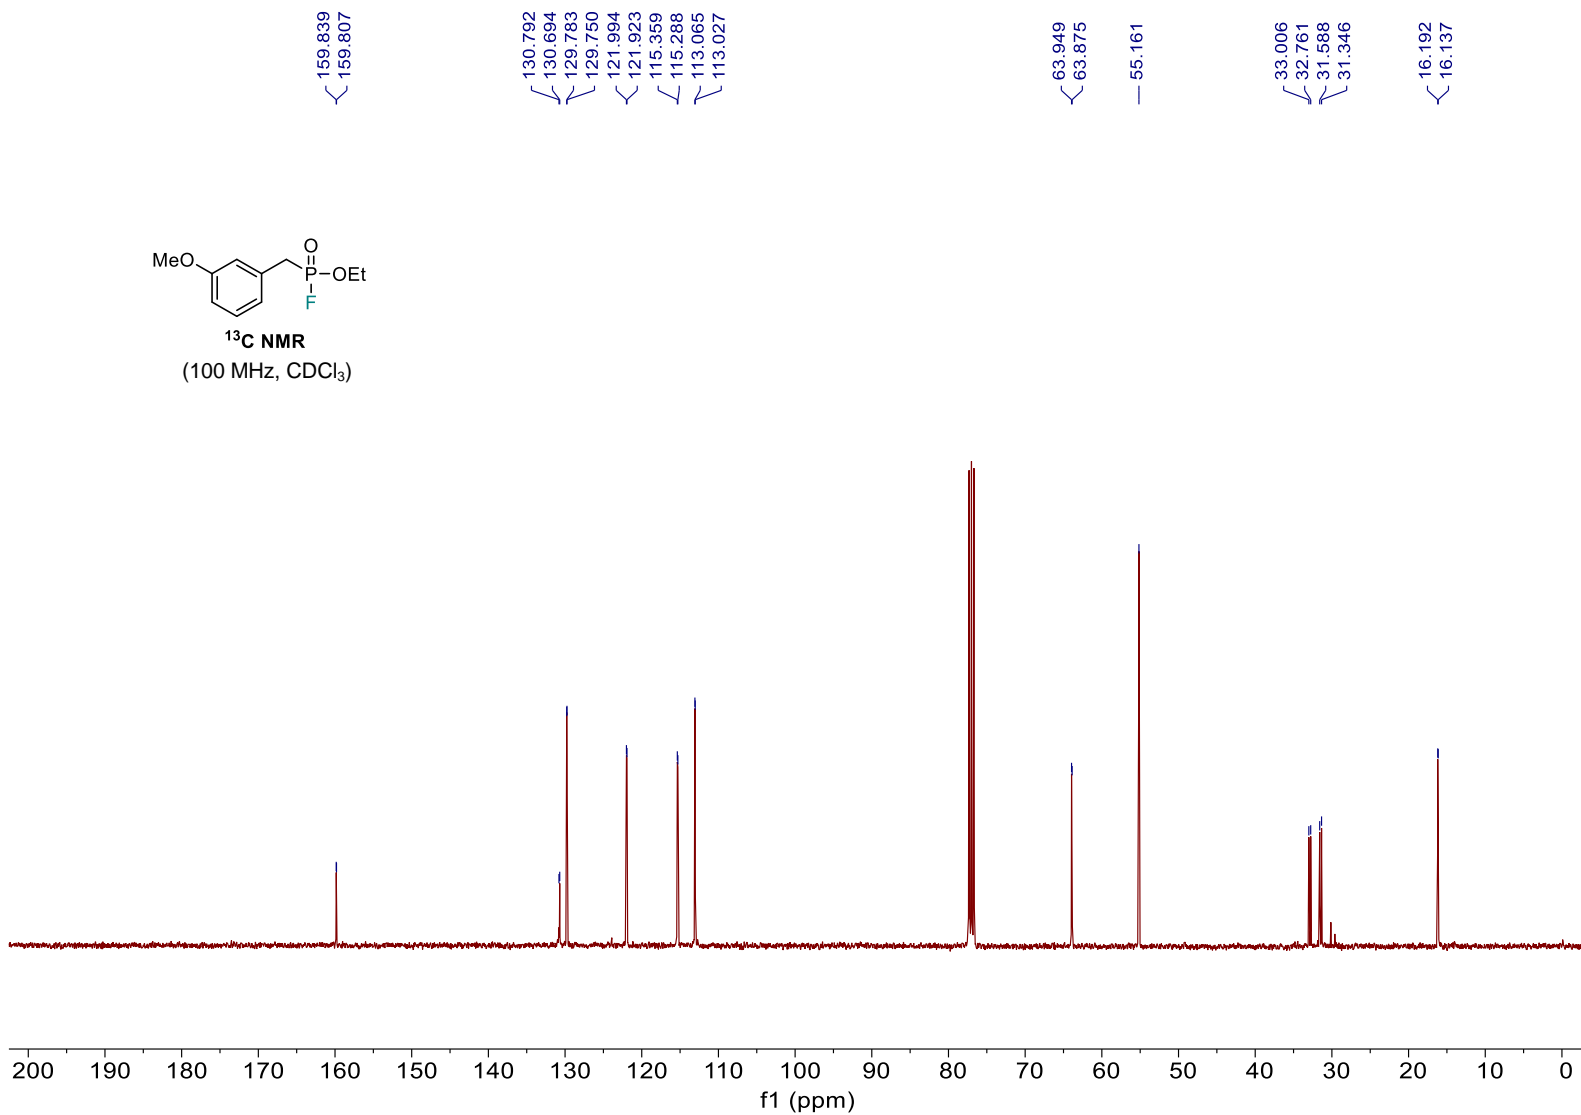

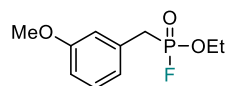

**<sup>31</sup>P NMR**  
(162 MHz, CDCl<sub>3</sub>)

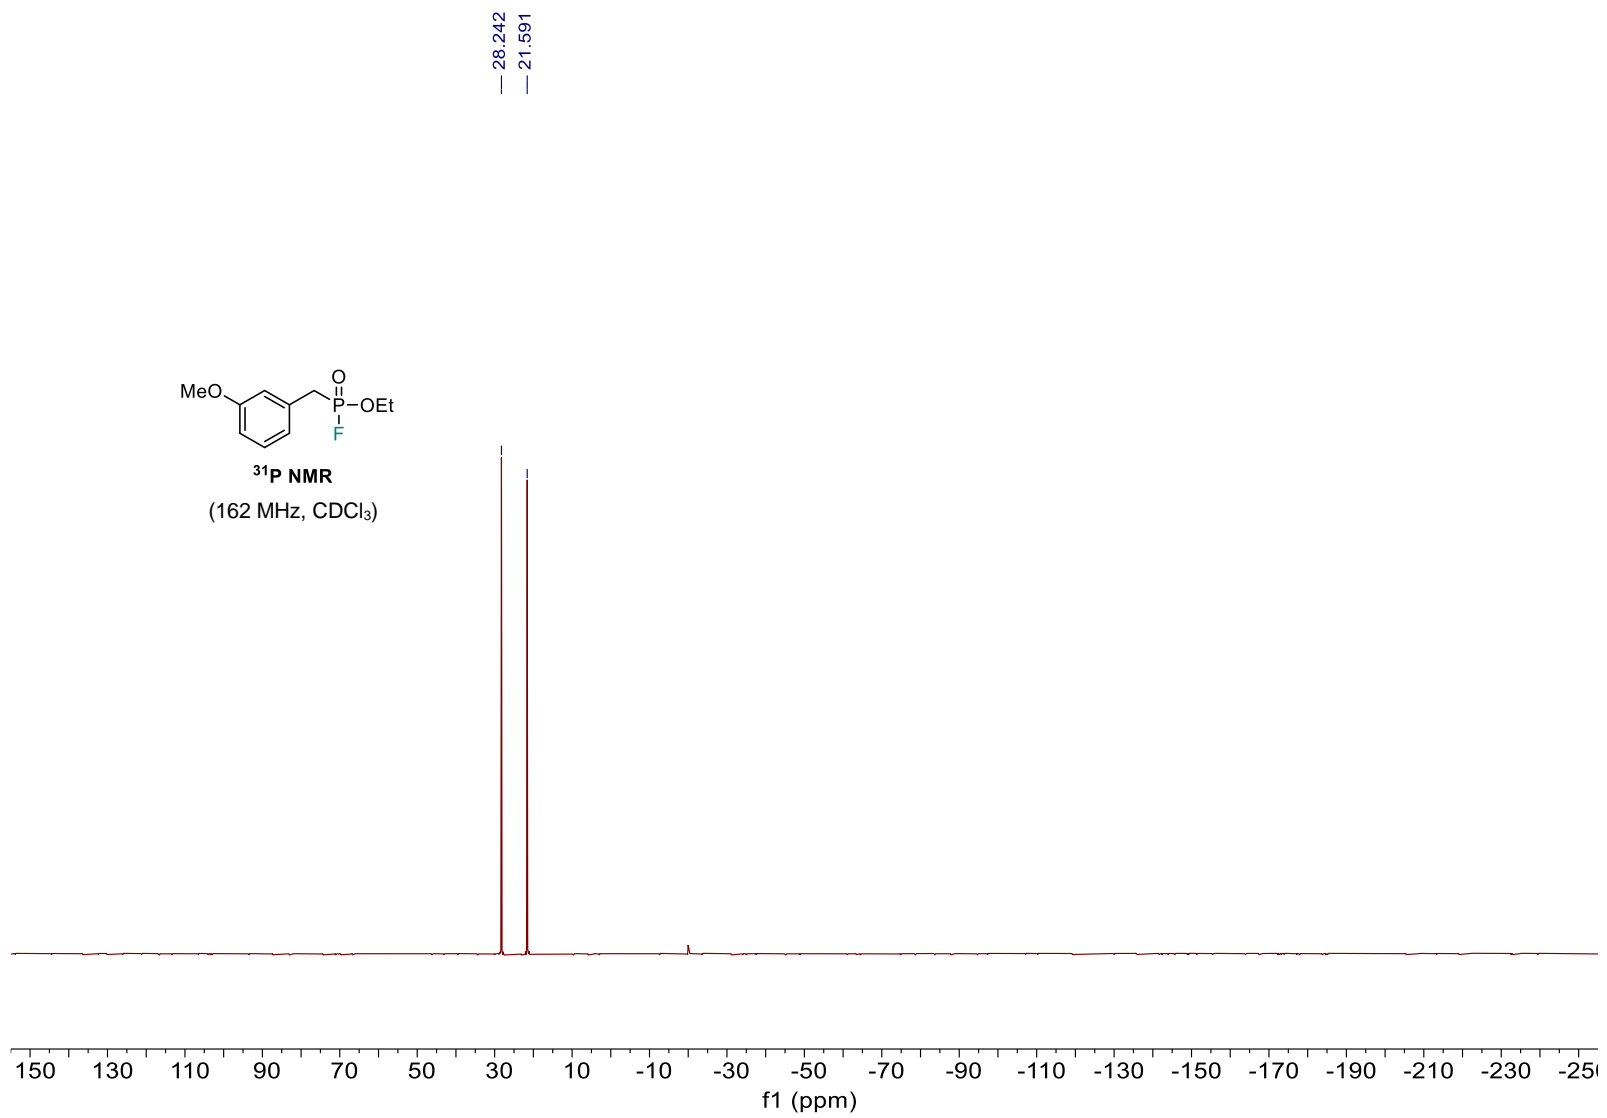

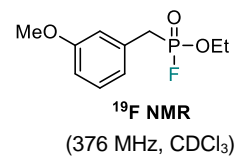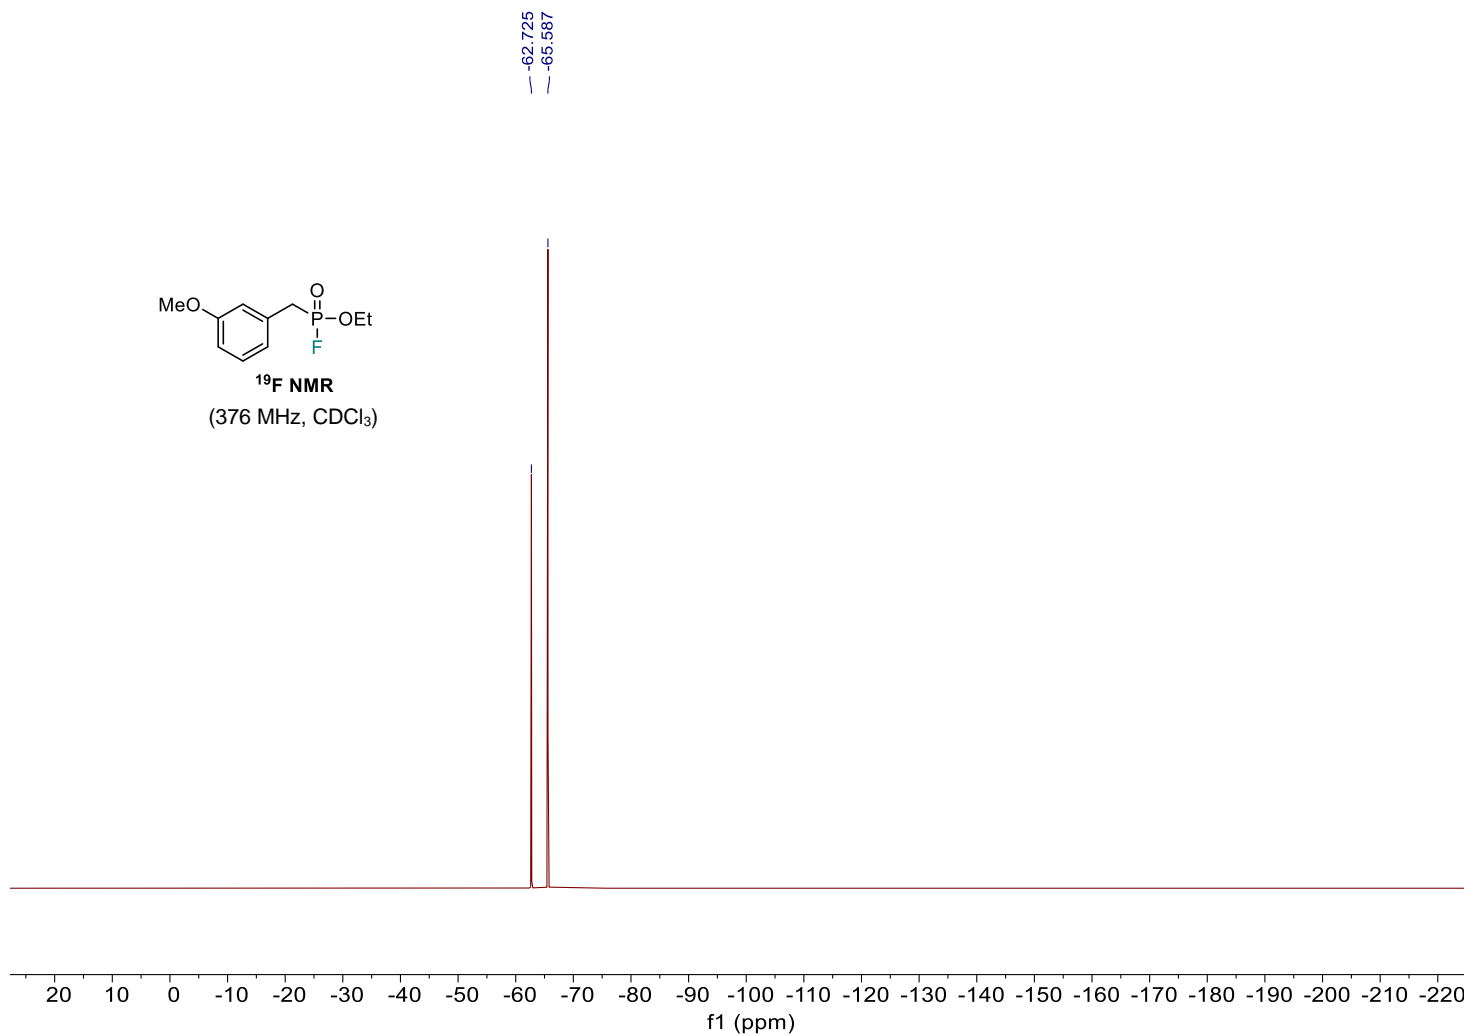



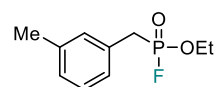

<sup>1</sup>H NMR  
(400 MHz, CDCl<sub>3</sub>)

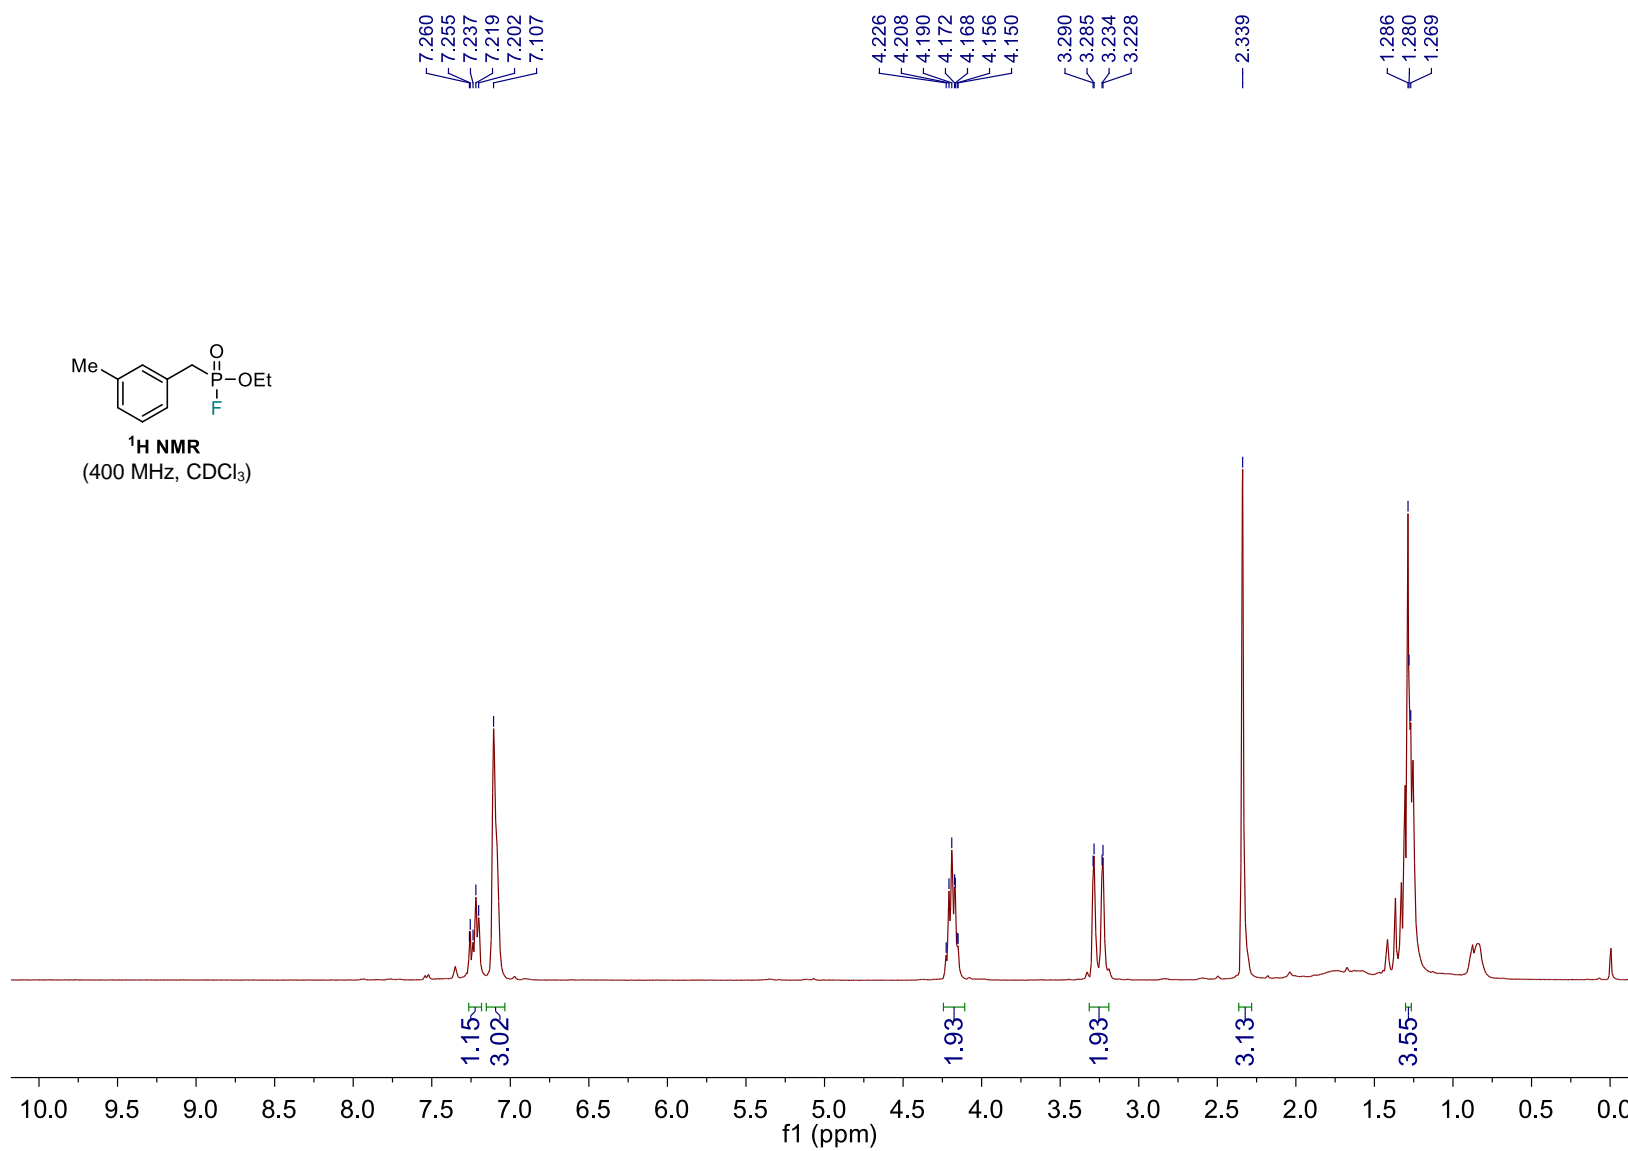

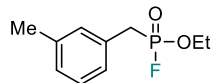

<sup>13</sup>C NMR  
(100 MHz, CDCl<sub>3</sub>)

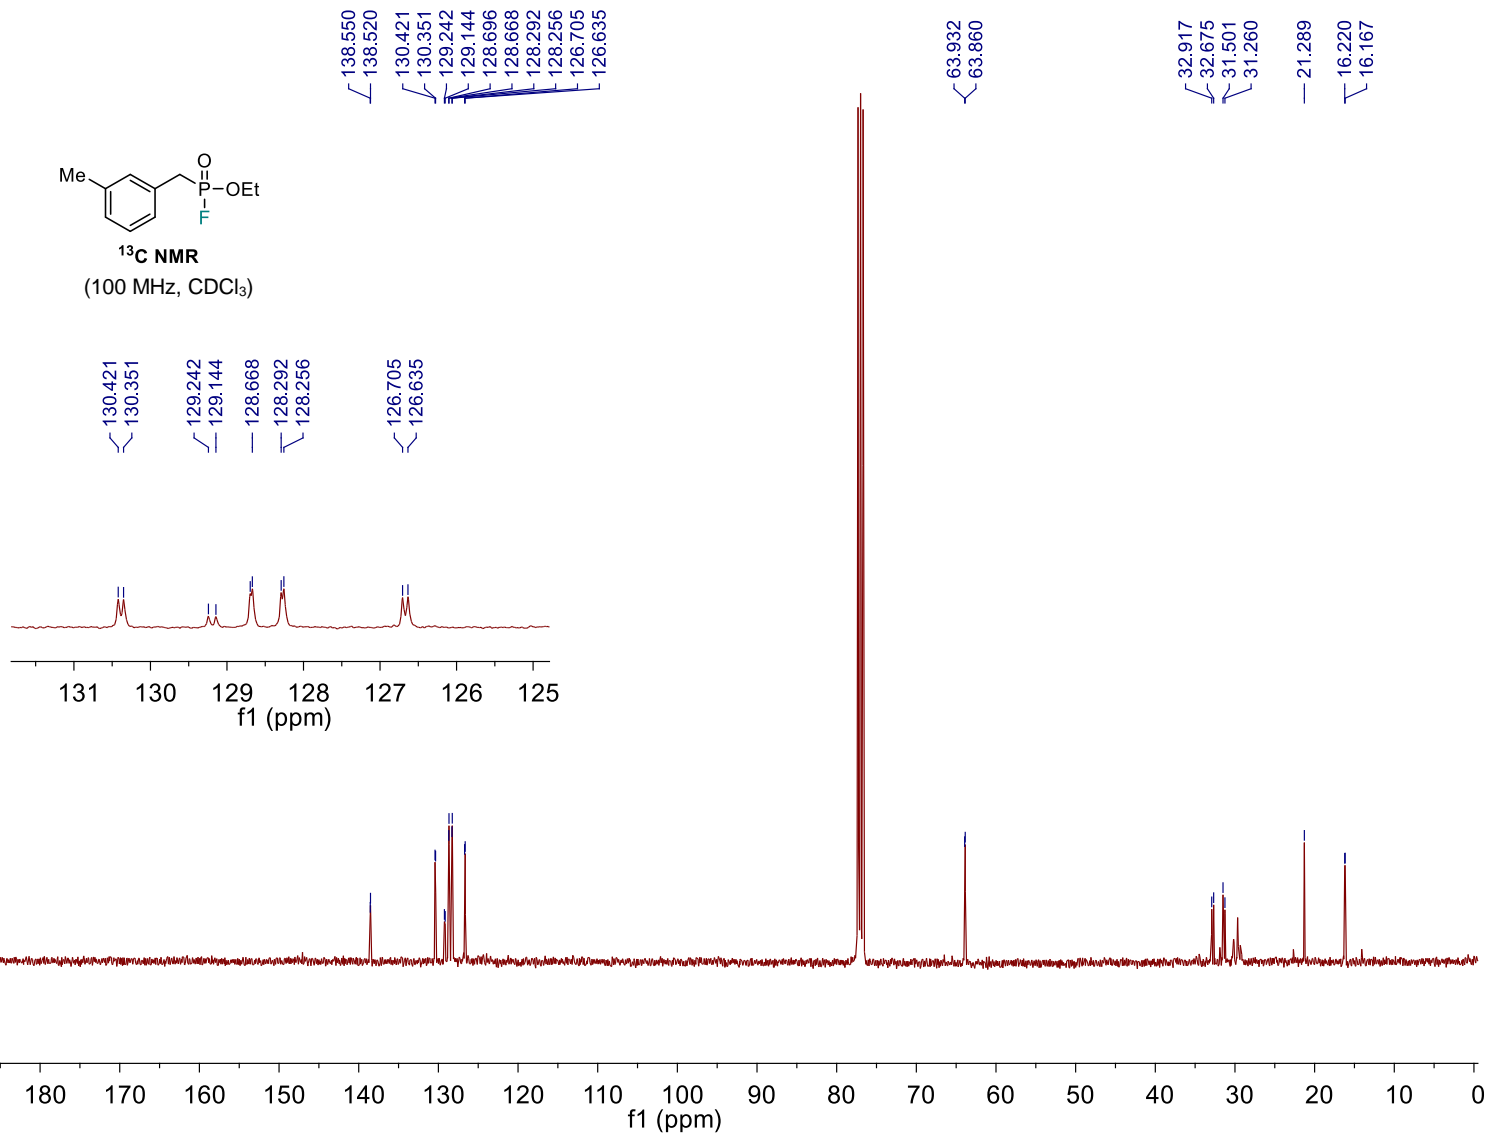

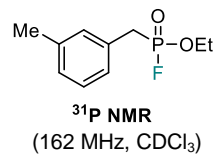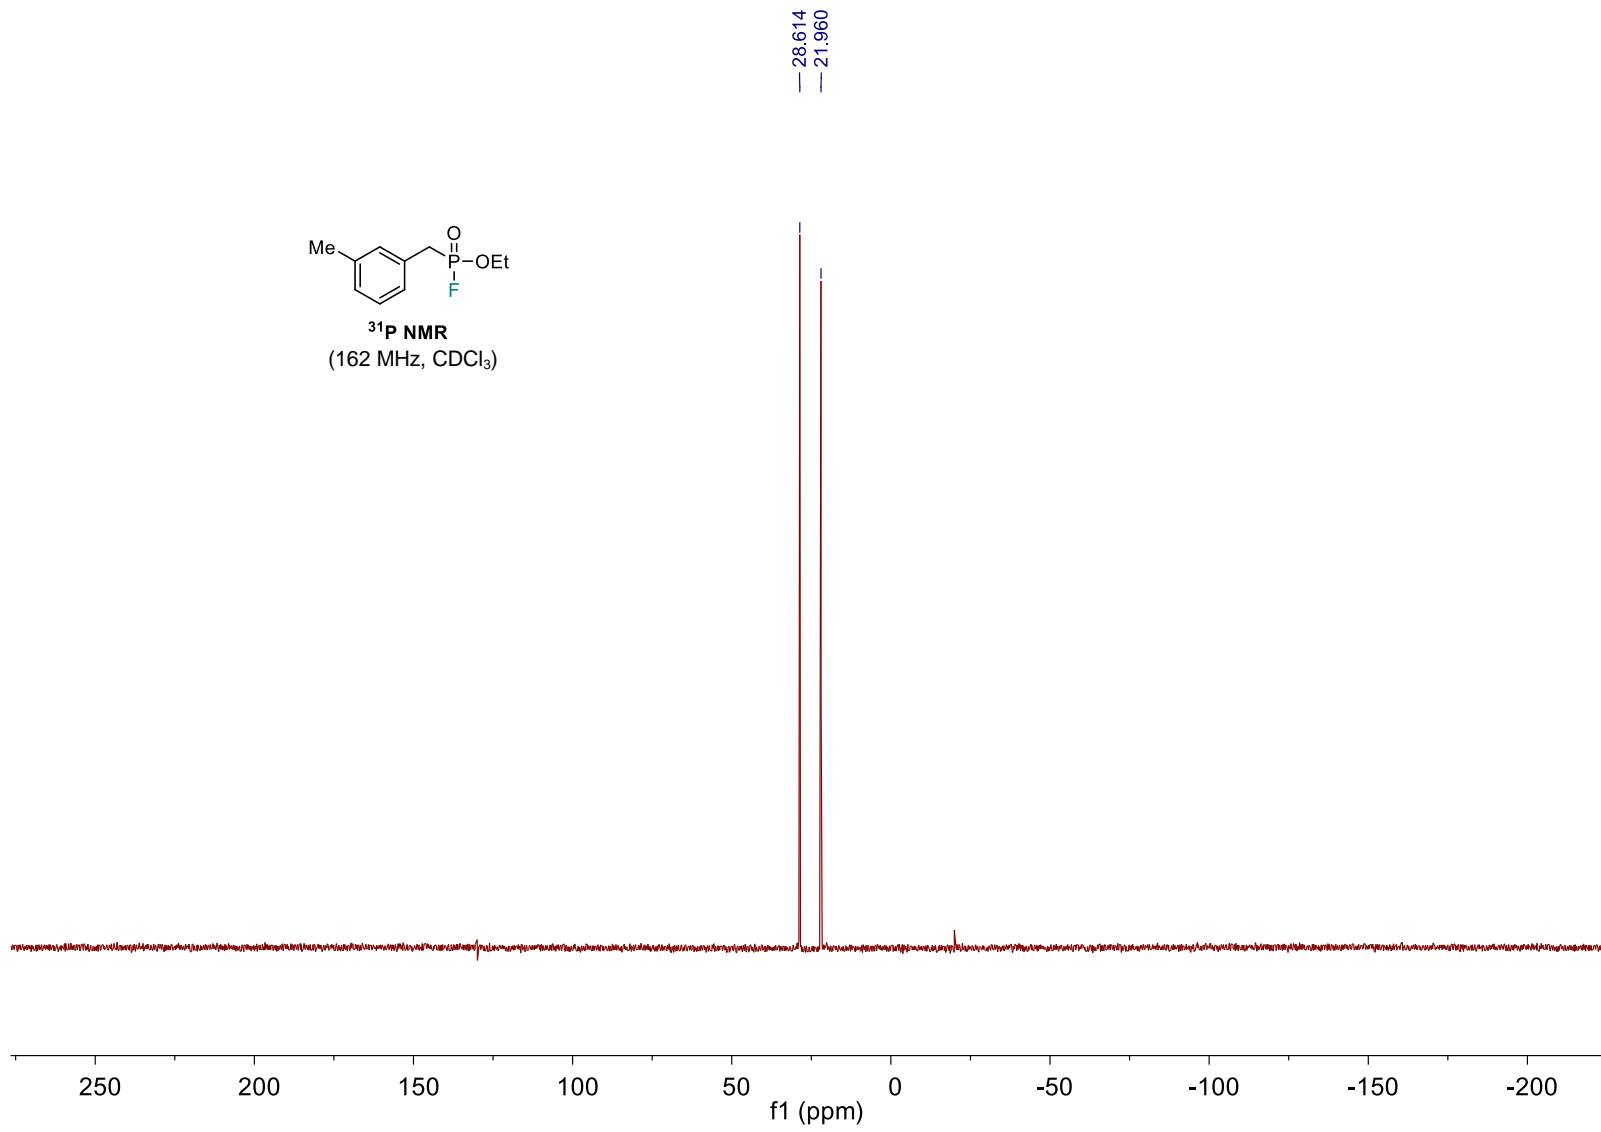

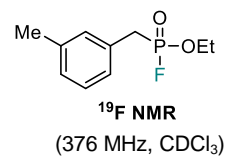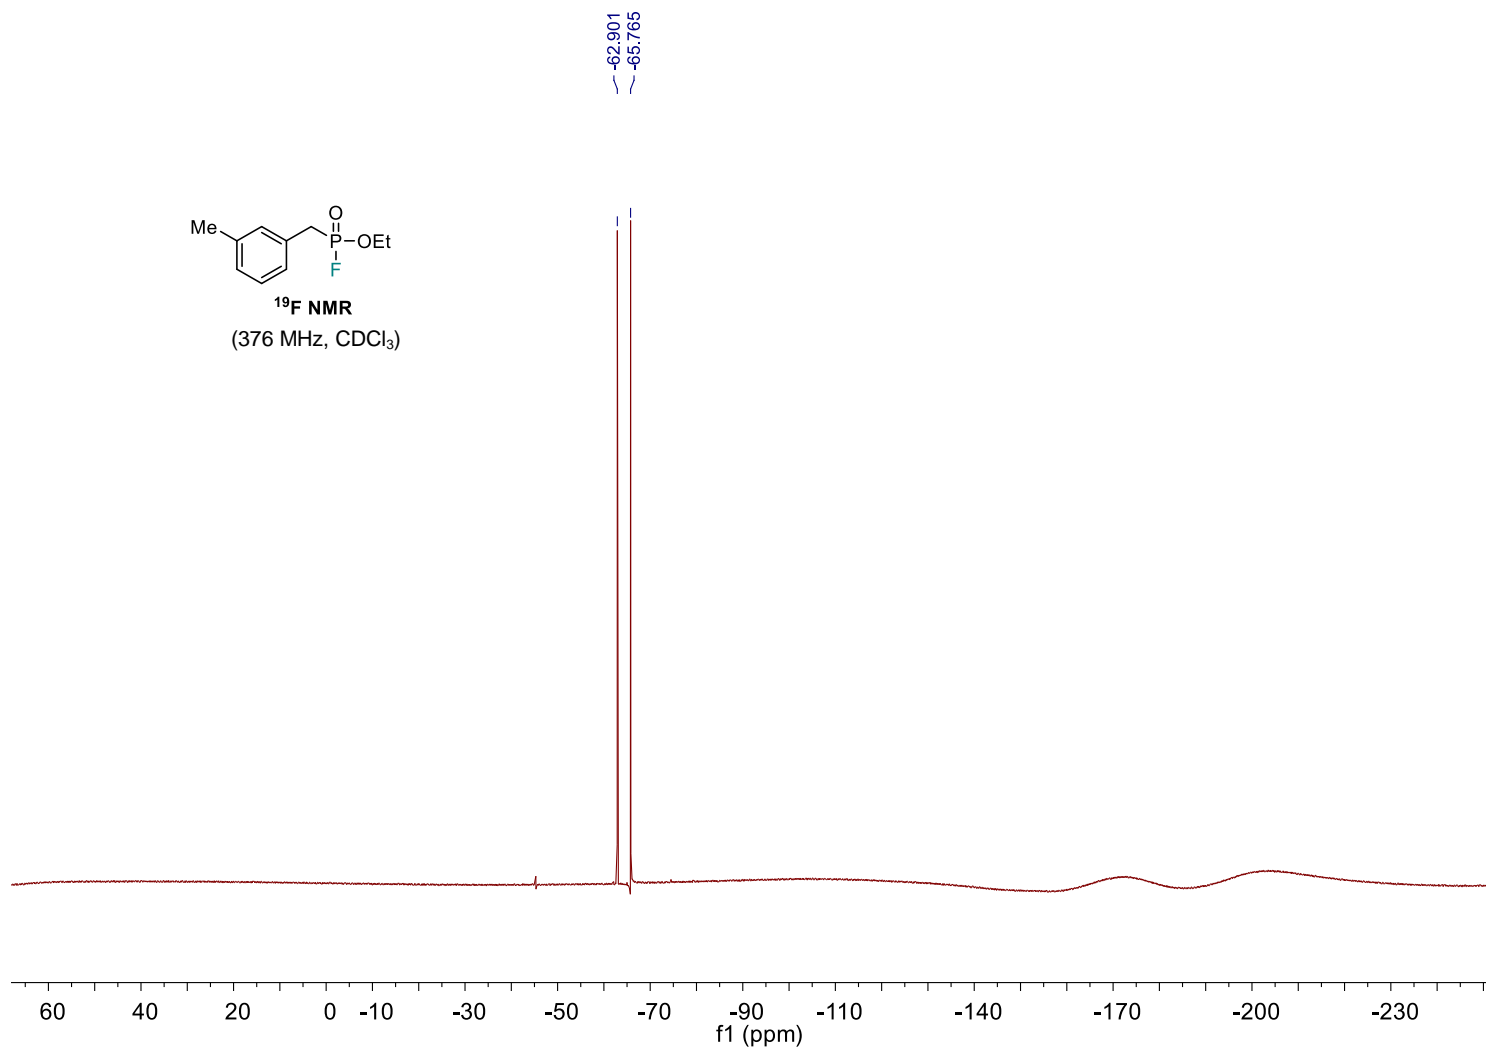

8.177  
8.174  
8.170  
8.161  
7.671  
7.658  
7.554  
7.541  
7.527

4.275  
4.263  
4.259  
4.251  
4.247  
4.240  
4.236  
4.224

3.429  
3.390

1.332  
1.321  
1.309

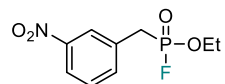

<sup>1</sup>H NMR  
(600 MHz, CDCl<sub>3</sub>)

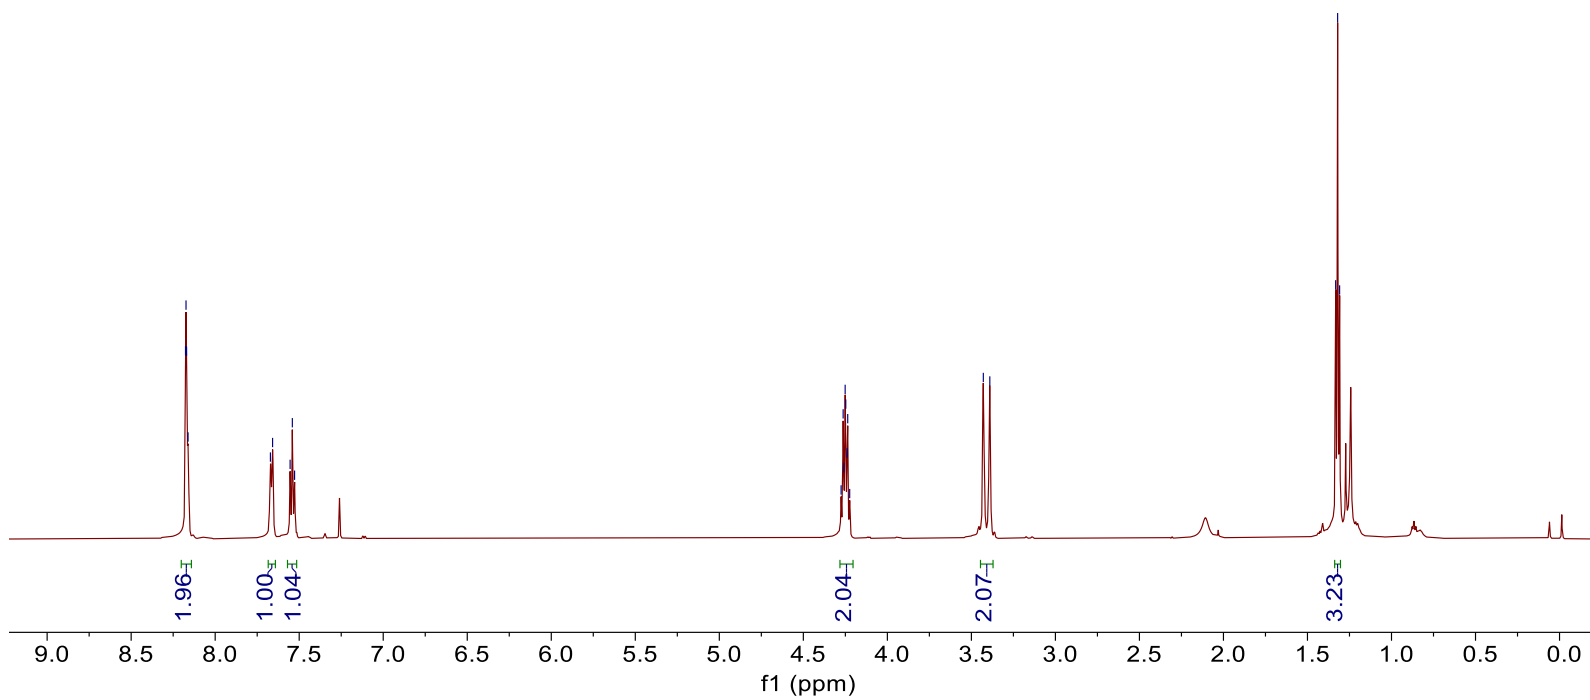

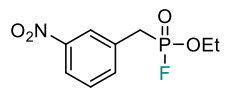

<sup>13</sup>C NMR  
(151 MHz, CDCl<sub>3</sub>)

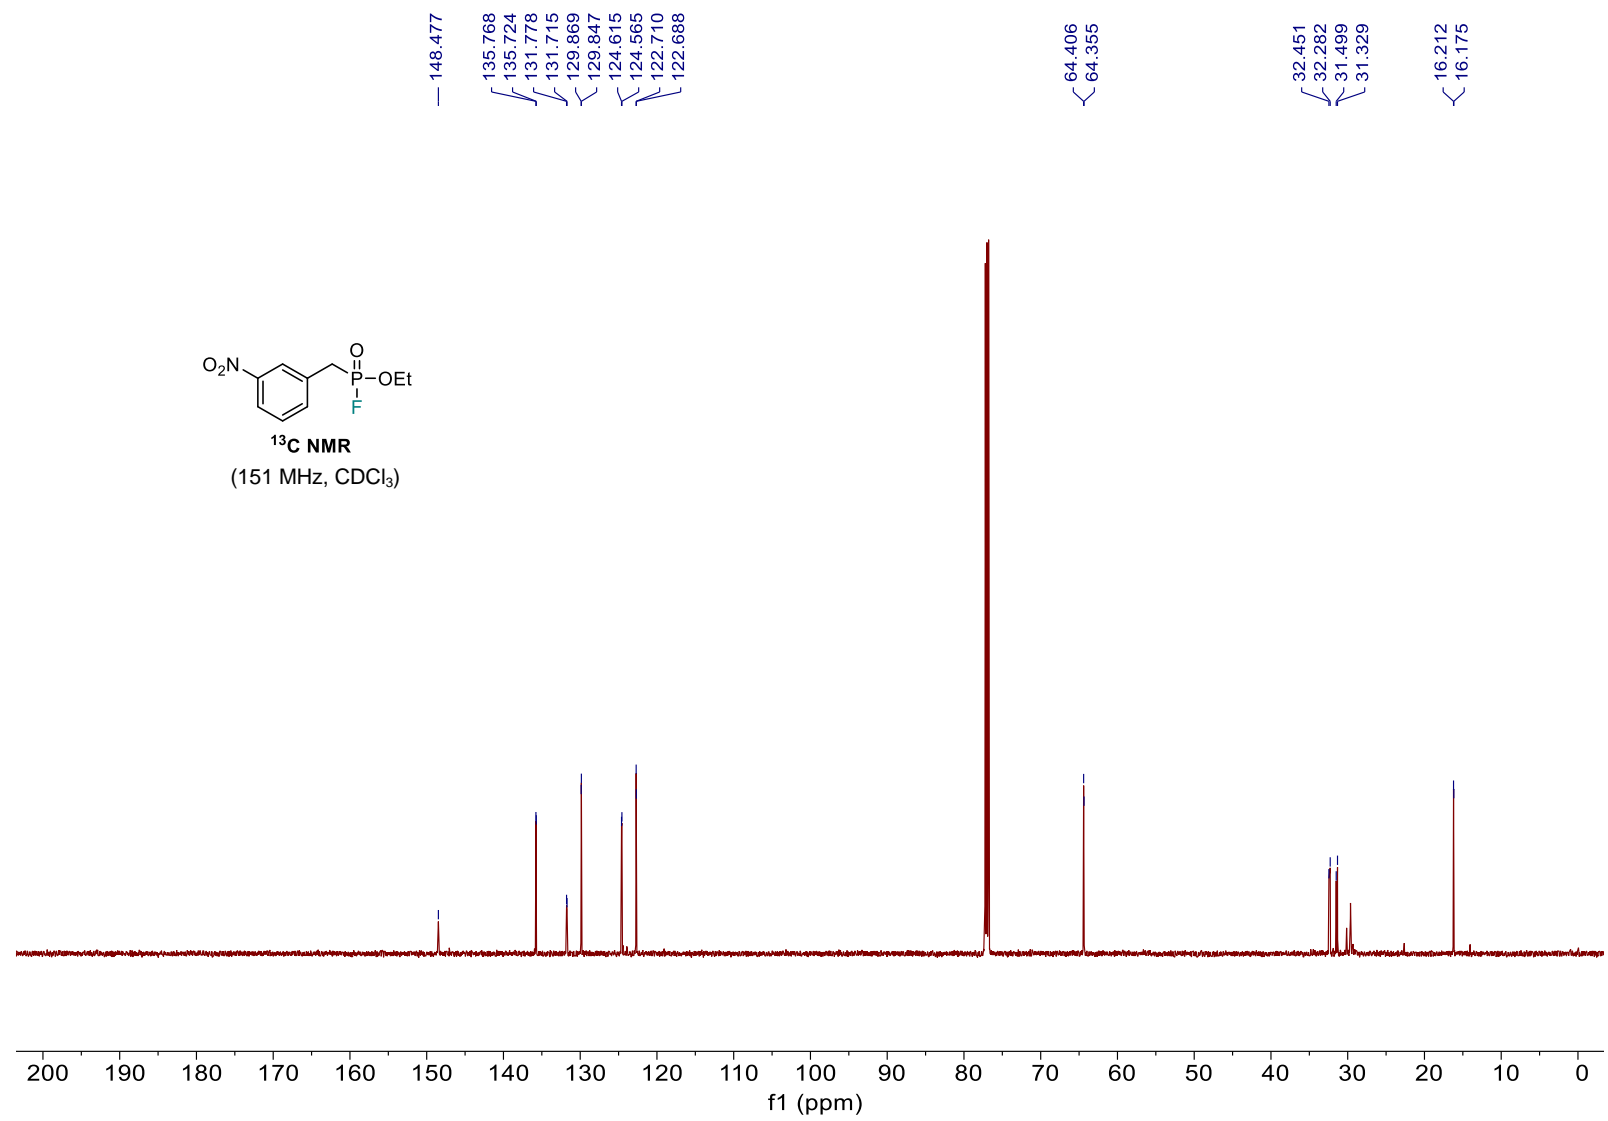

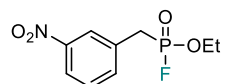

**<sup>31</sup>P NMR**  
(243 MHz, CDCl<sub>3</sub>)

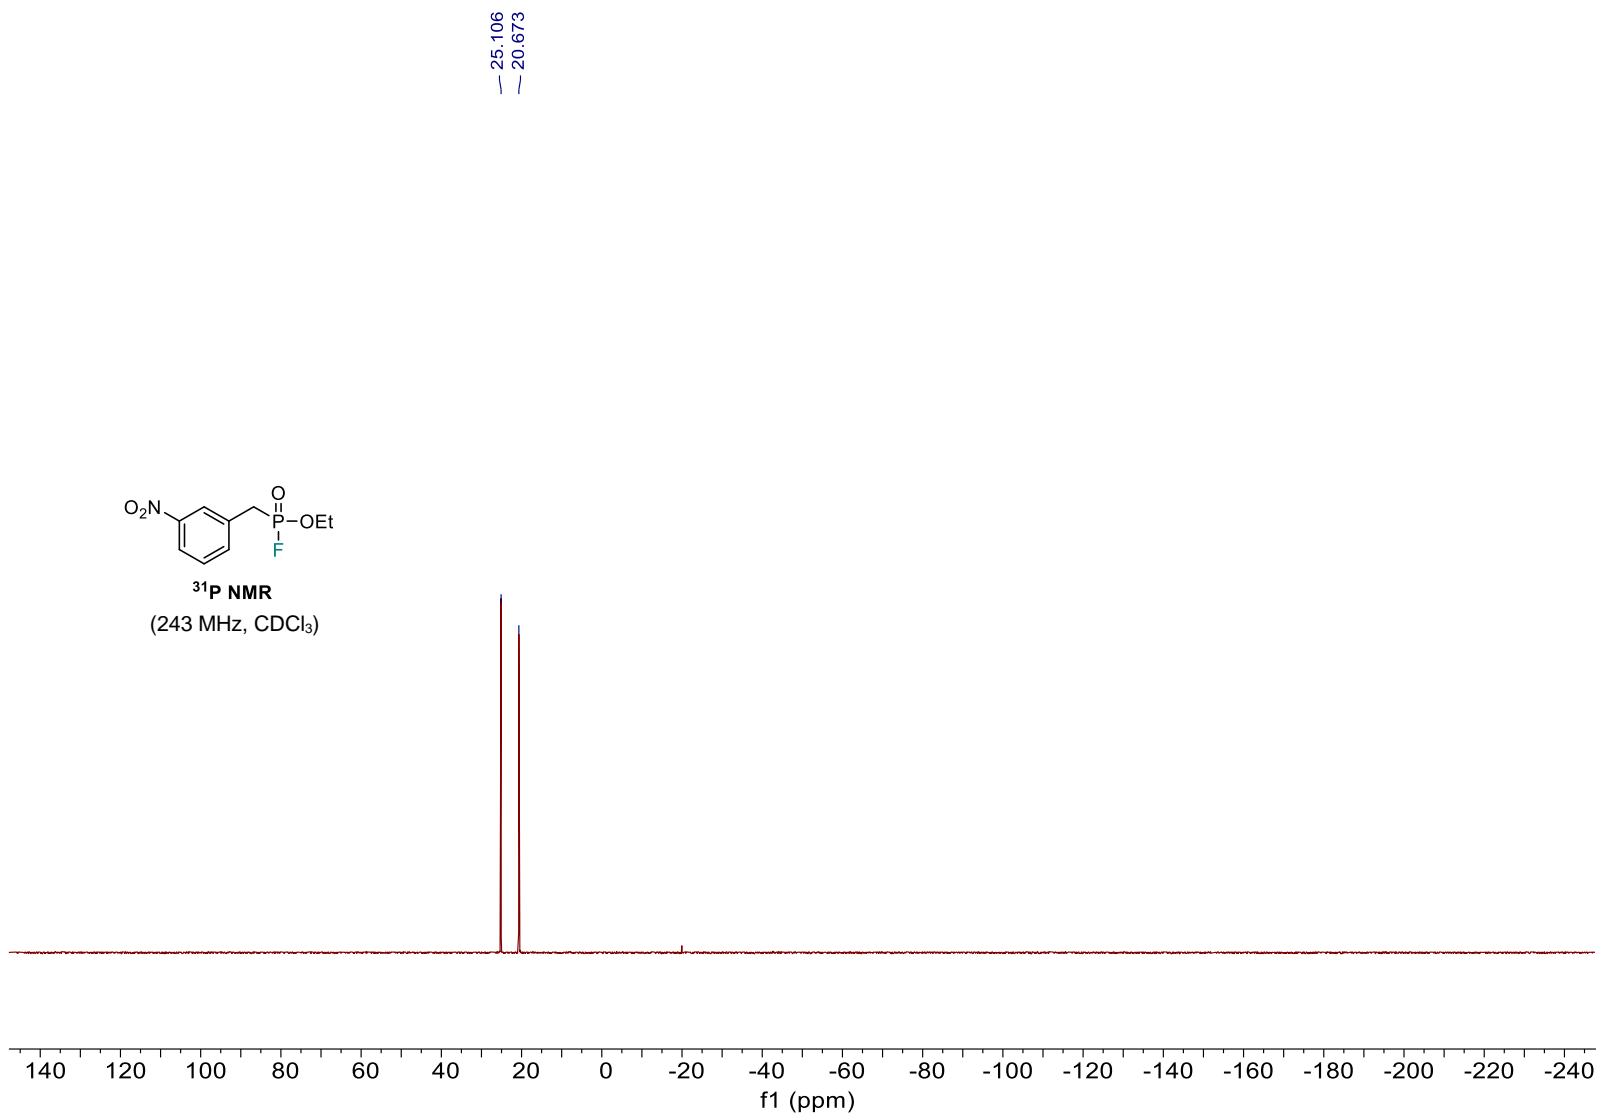

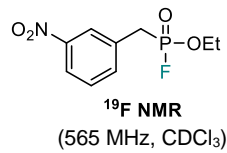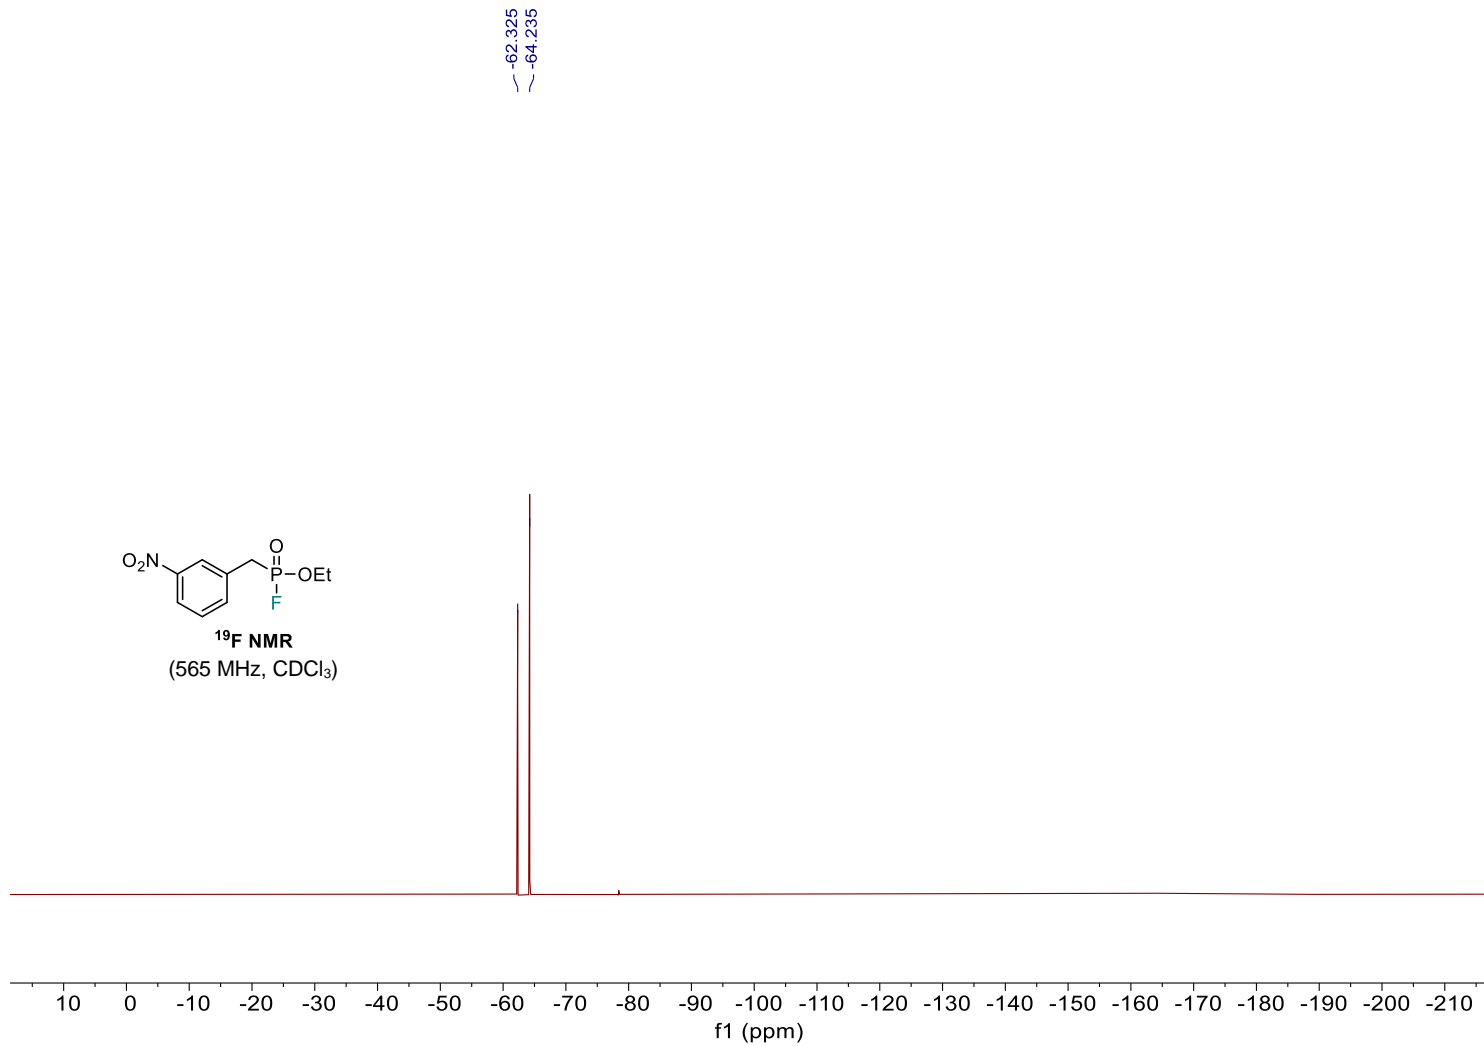



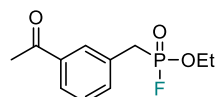

**<sup>1</sup>H NMR**  
(400 MHz, CDCl<sub>3</sub>)

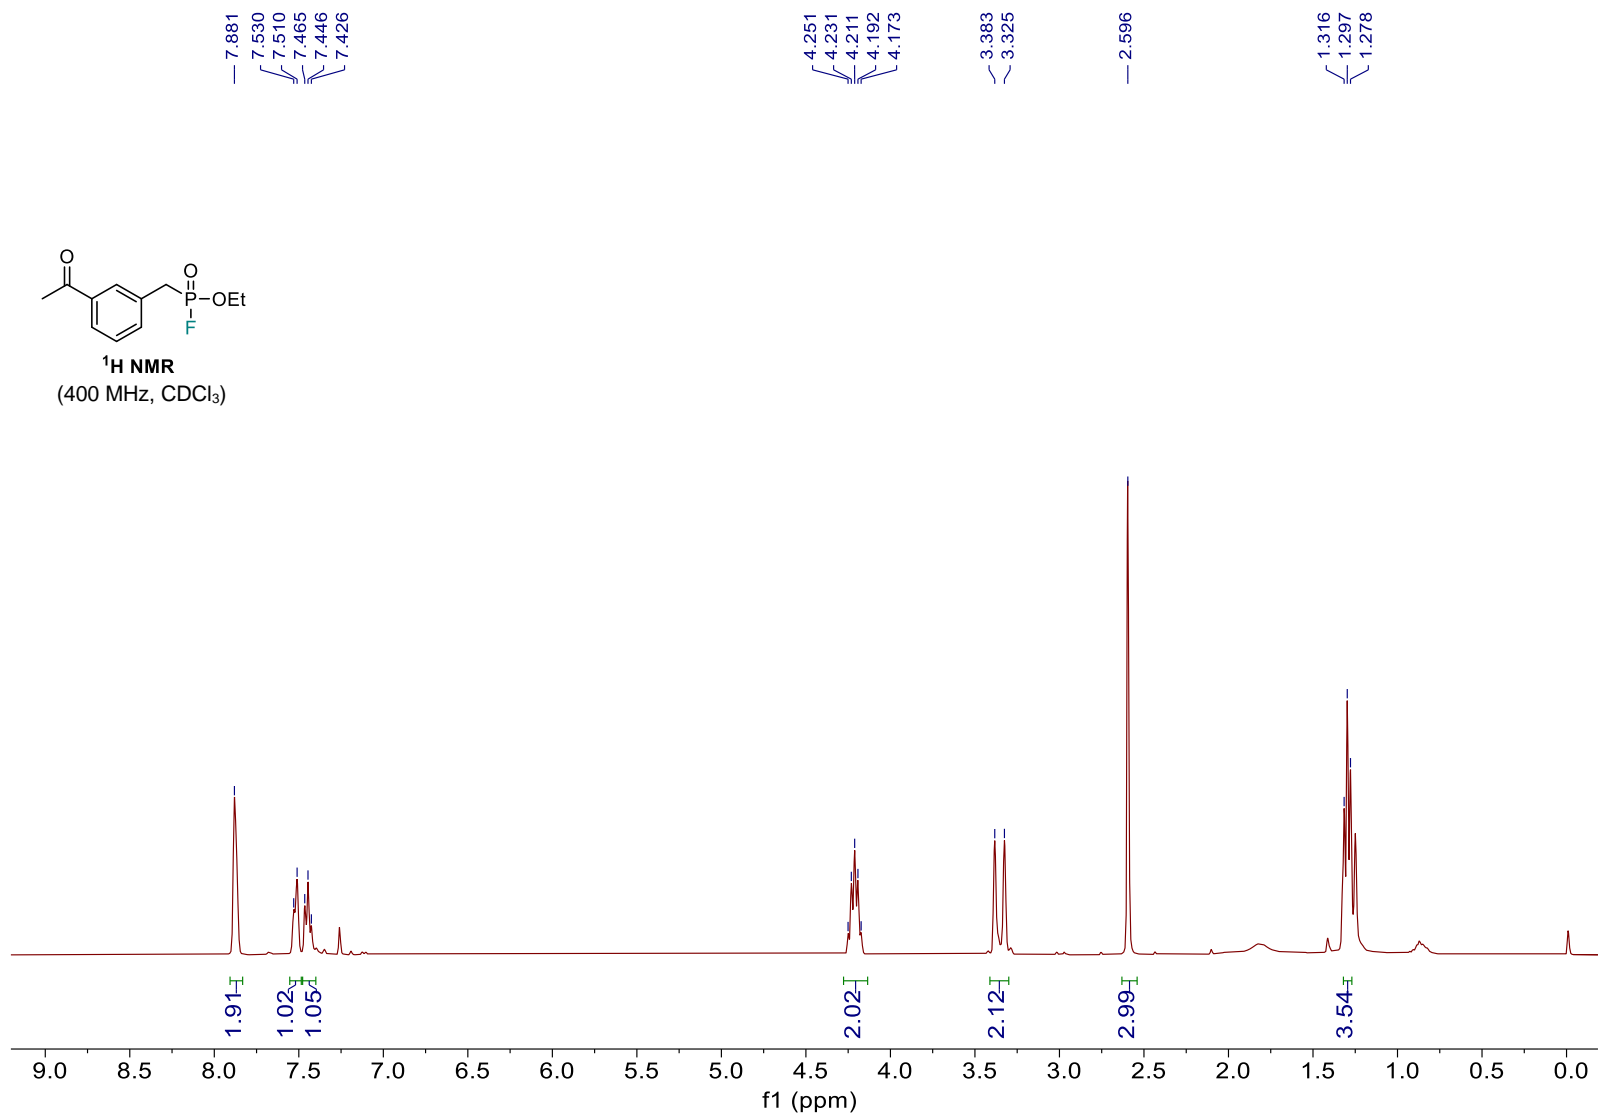

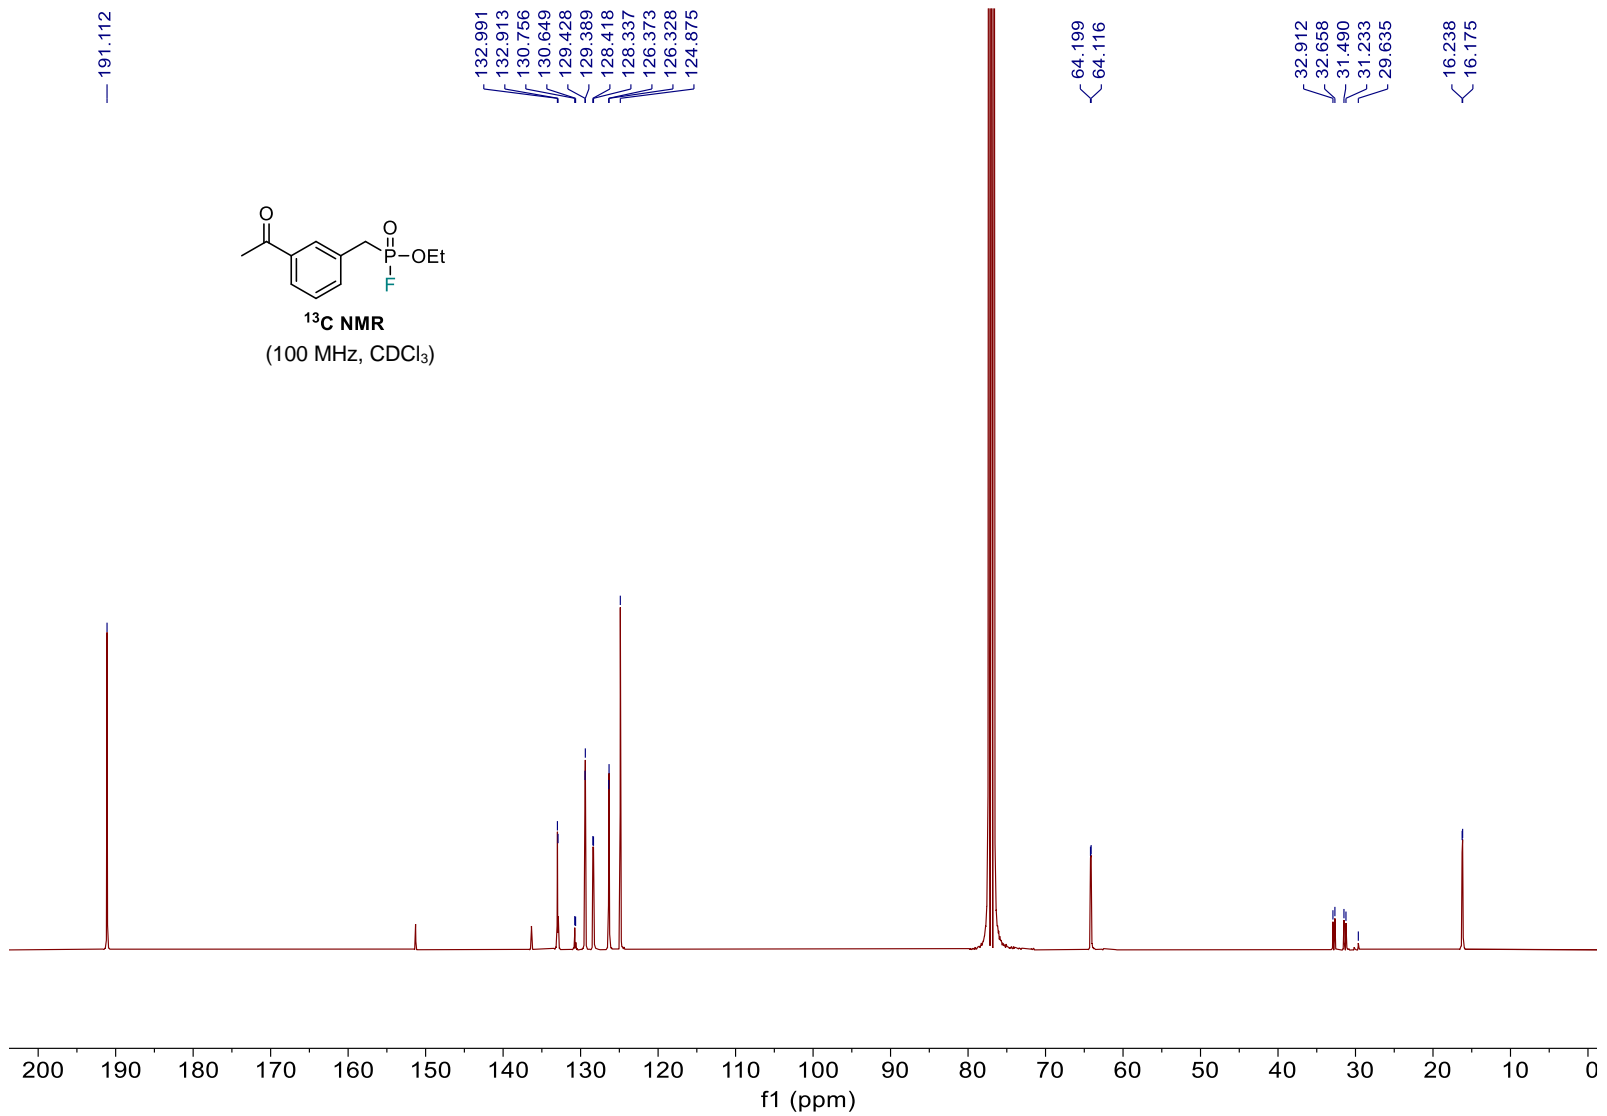

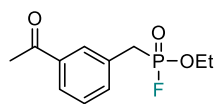

**<sup>31</sup>P NMR**  
(162 MHz, CDCl<sub>3</sub>)

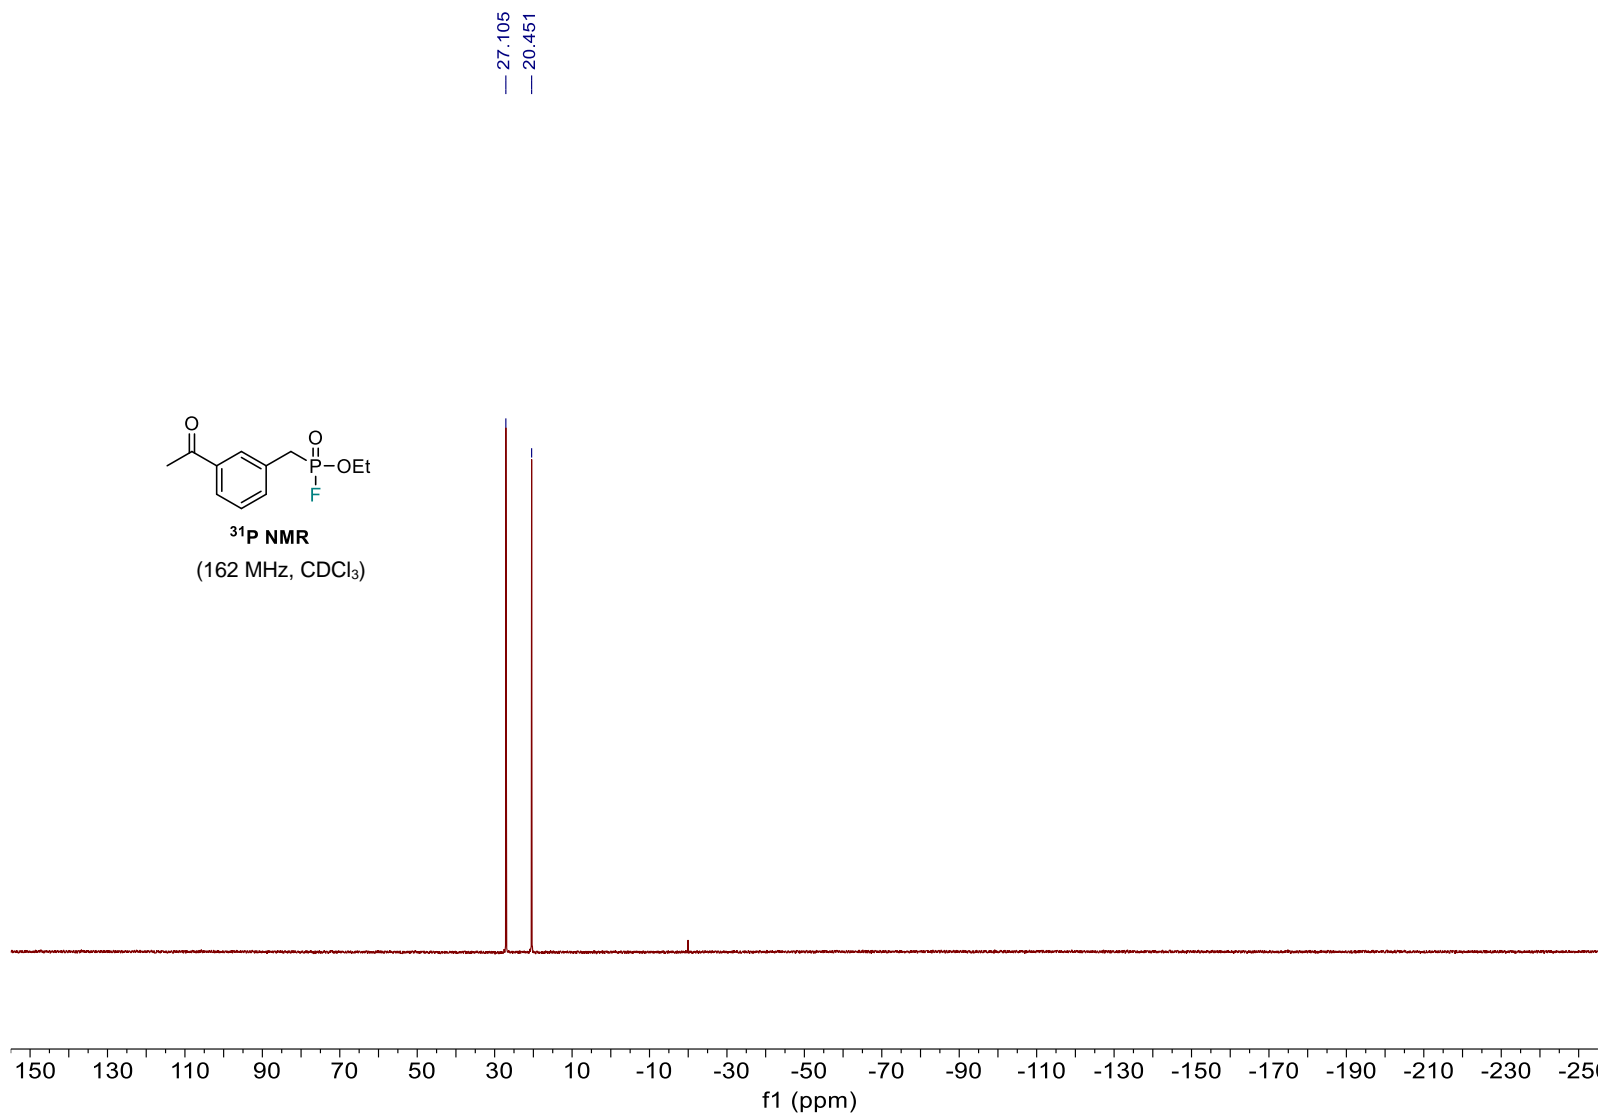

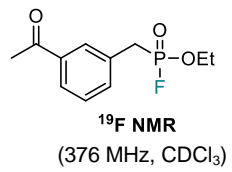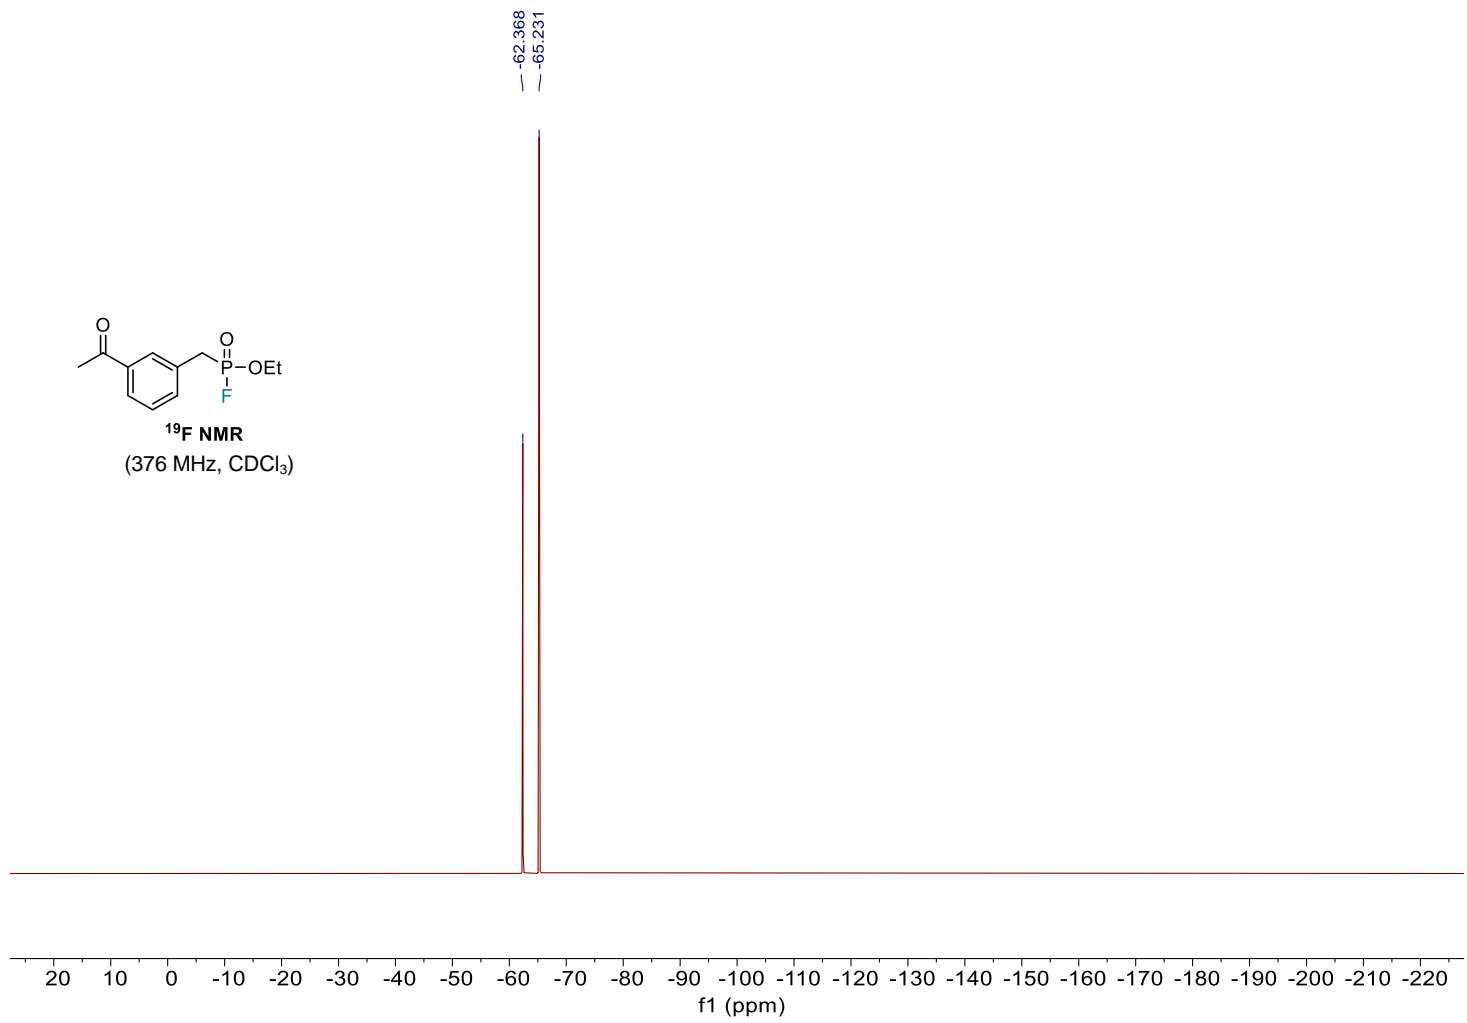

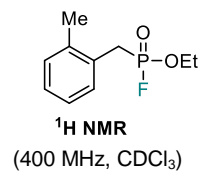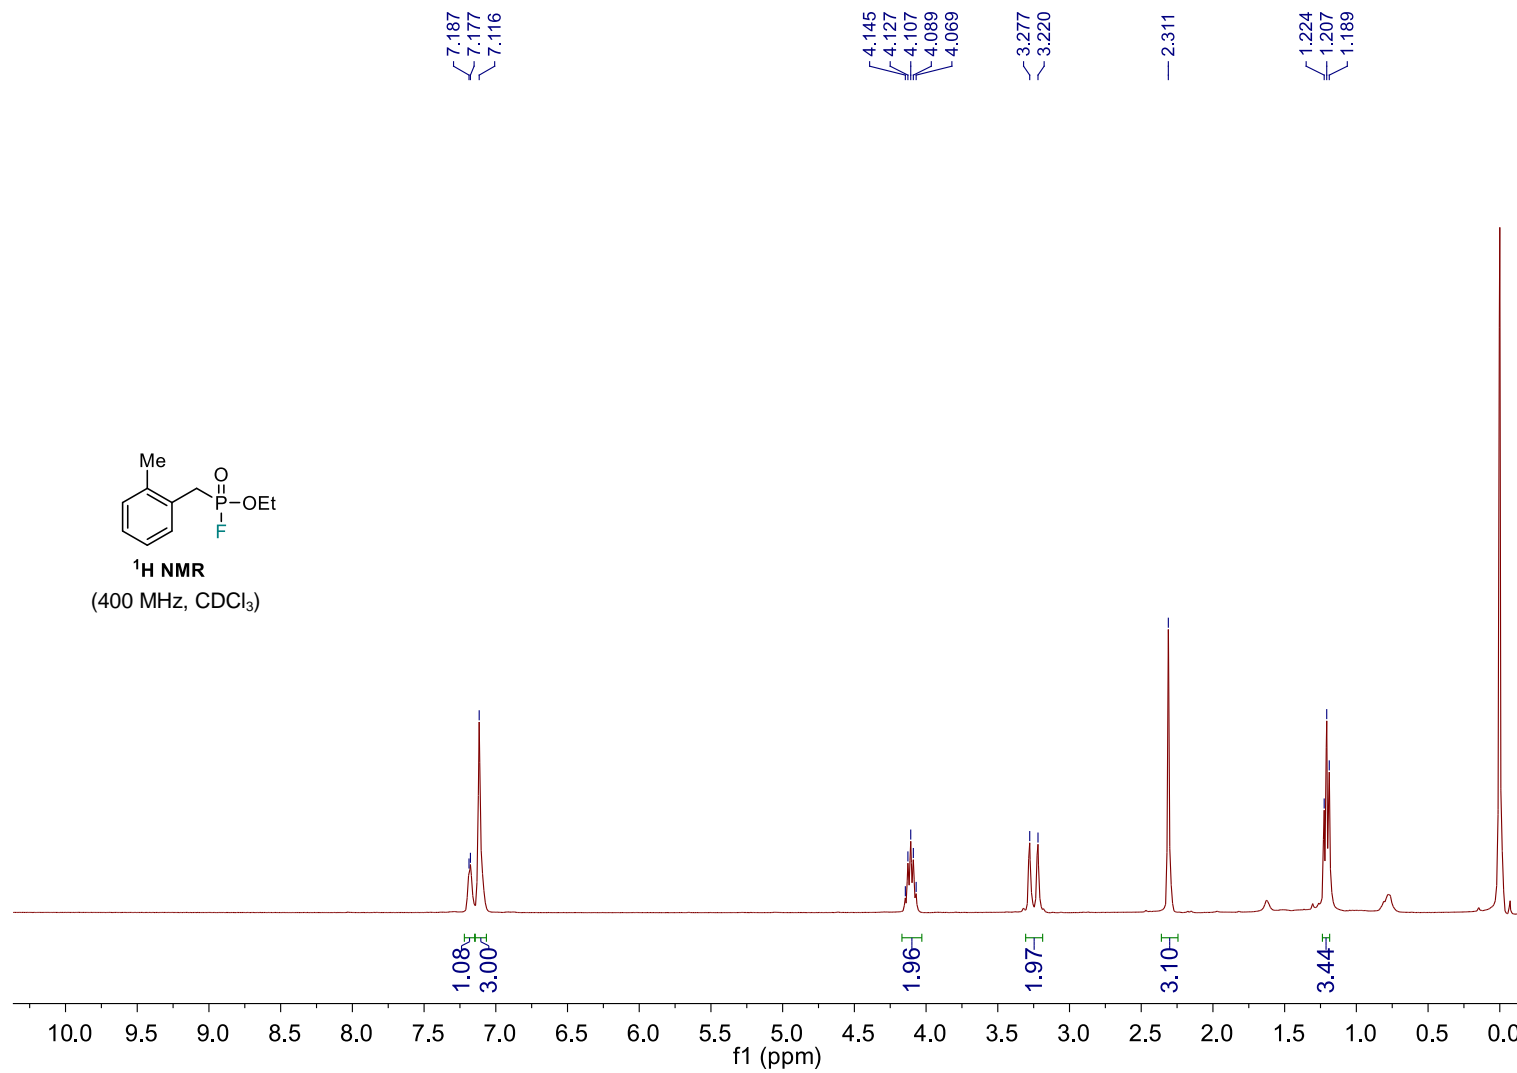

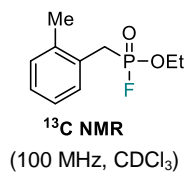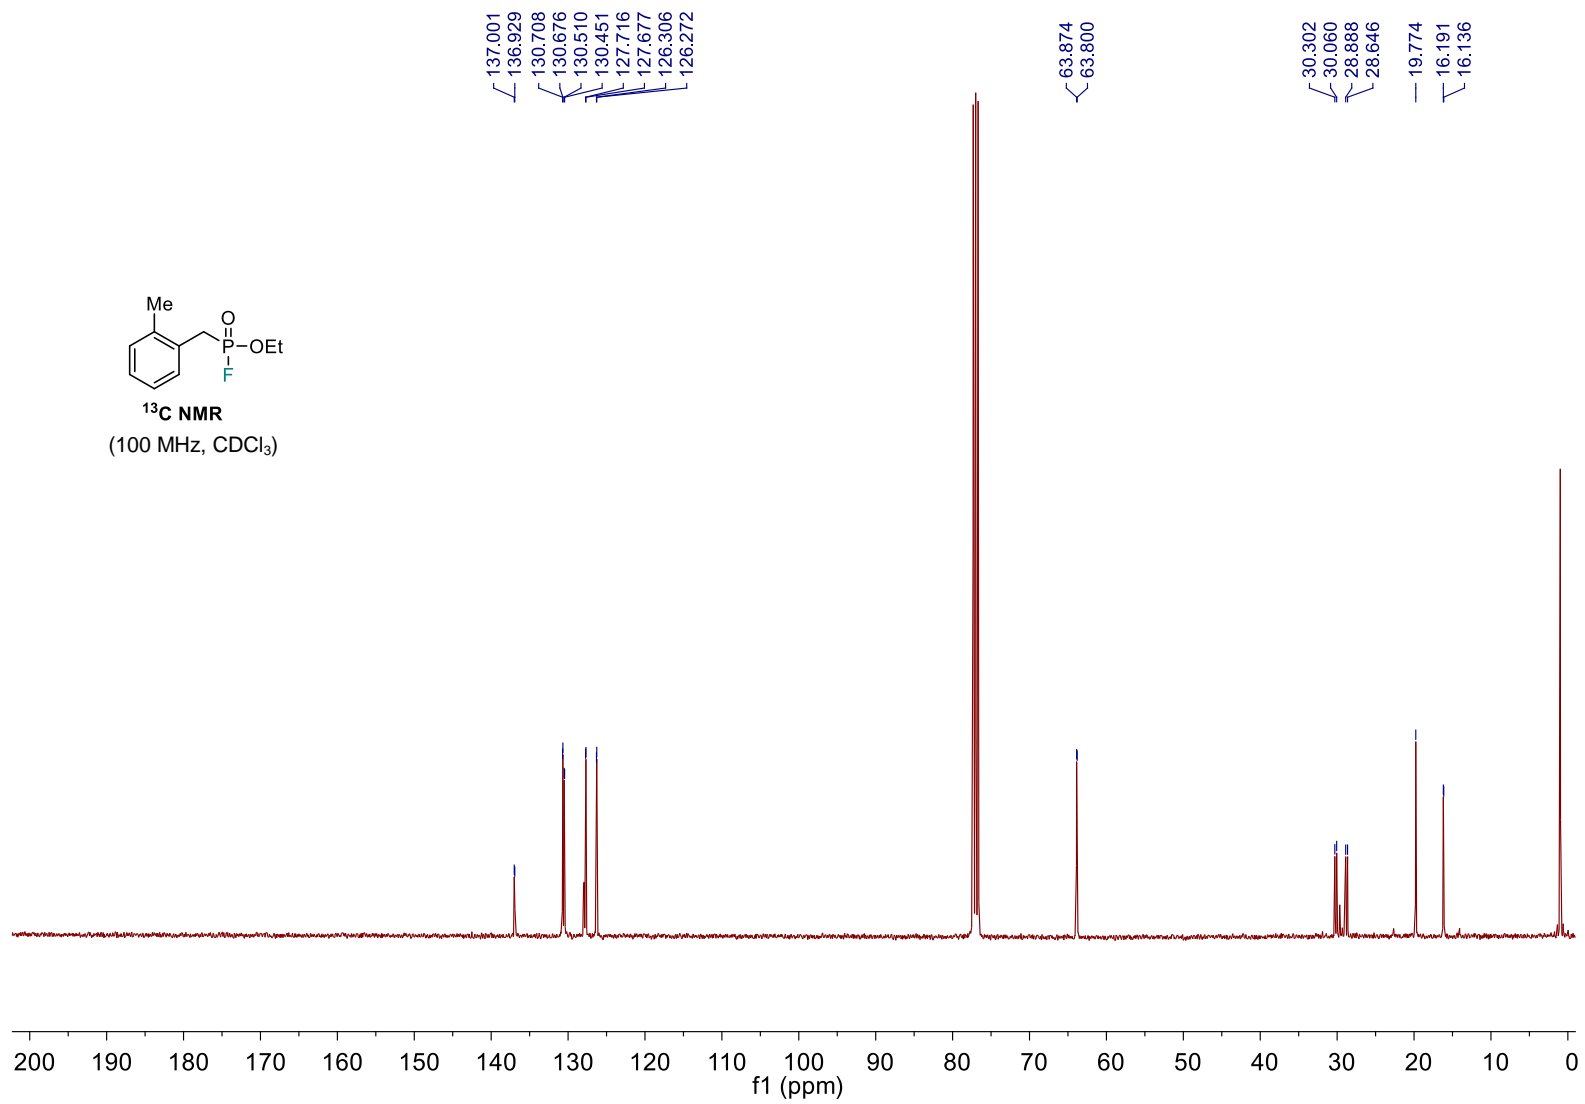

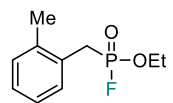

**<sup>31</sup>P NMR**  
(162 MHz, CDCl<sub>3</sub>)

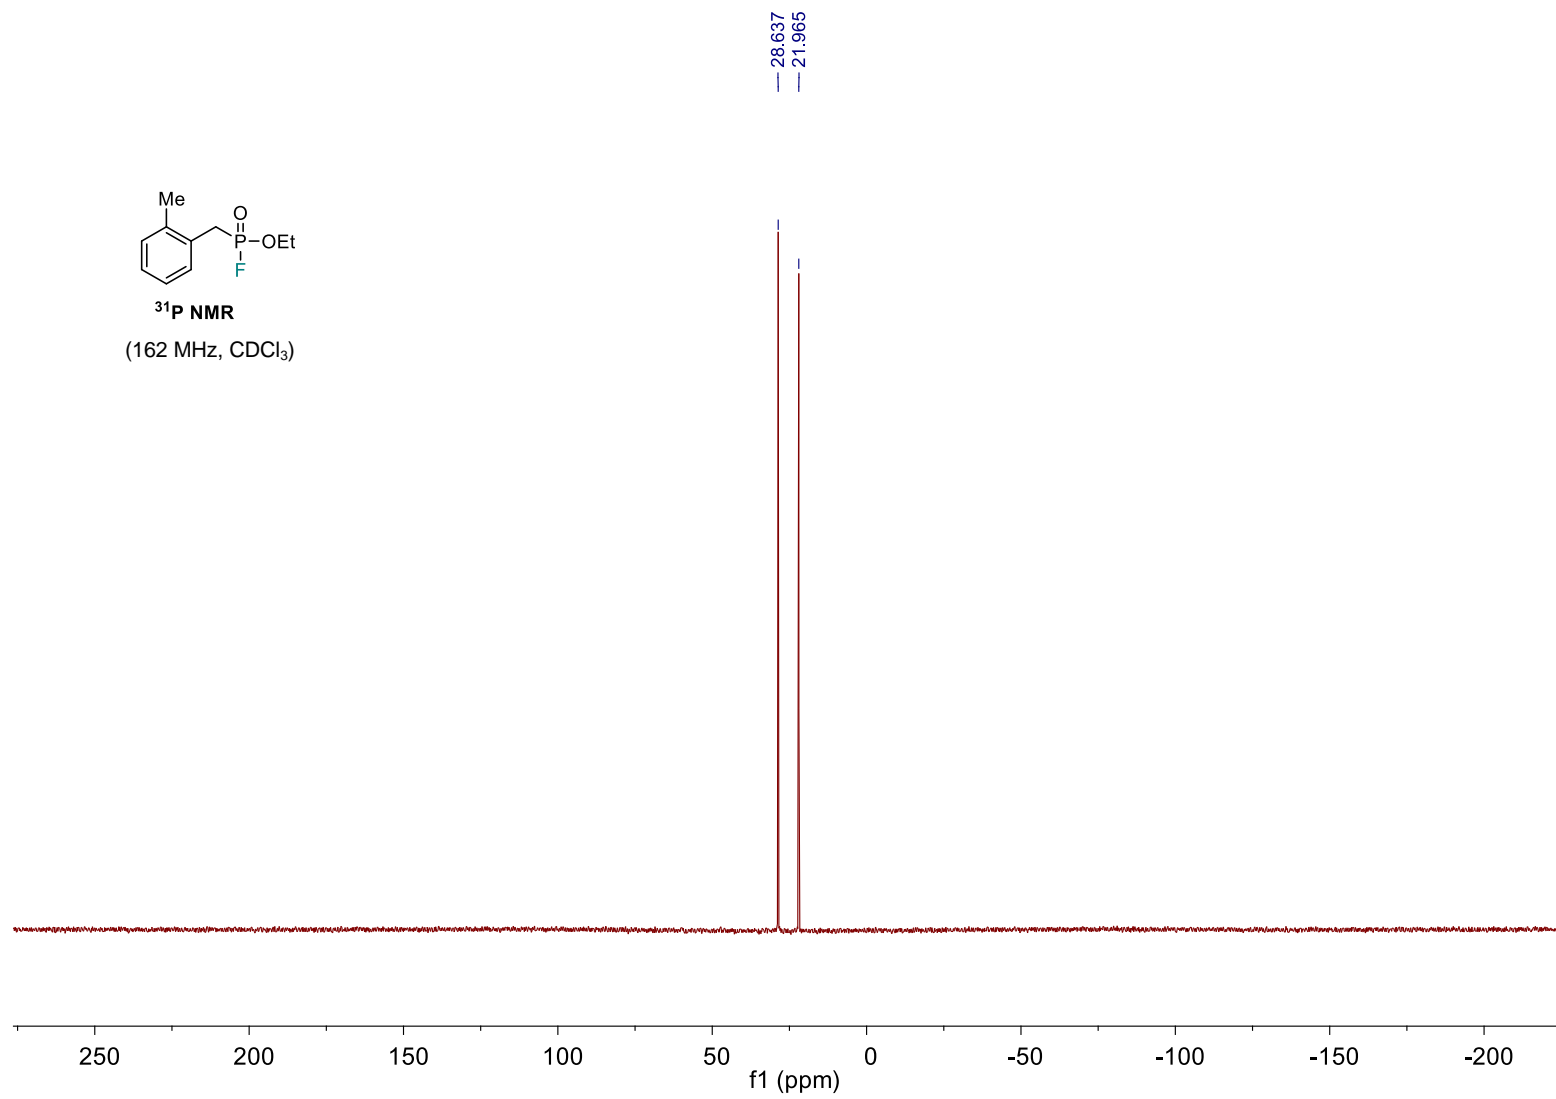

S303

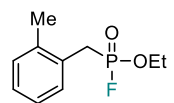

**<sup>19</sup>F NMR**  
(376 MHz, CDCl<sub>3</sub>)

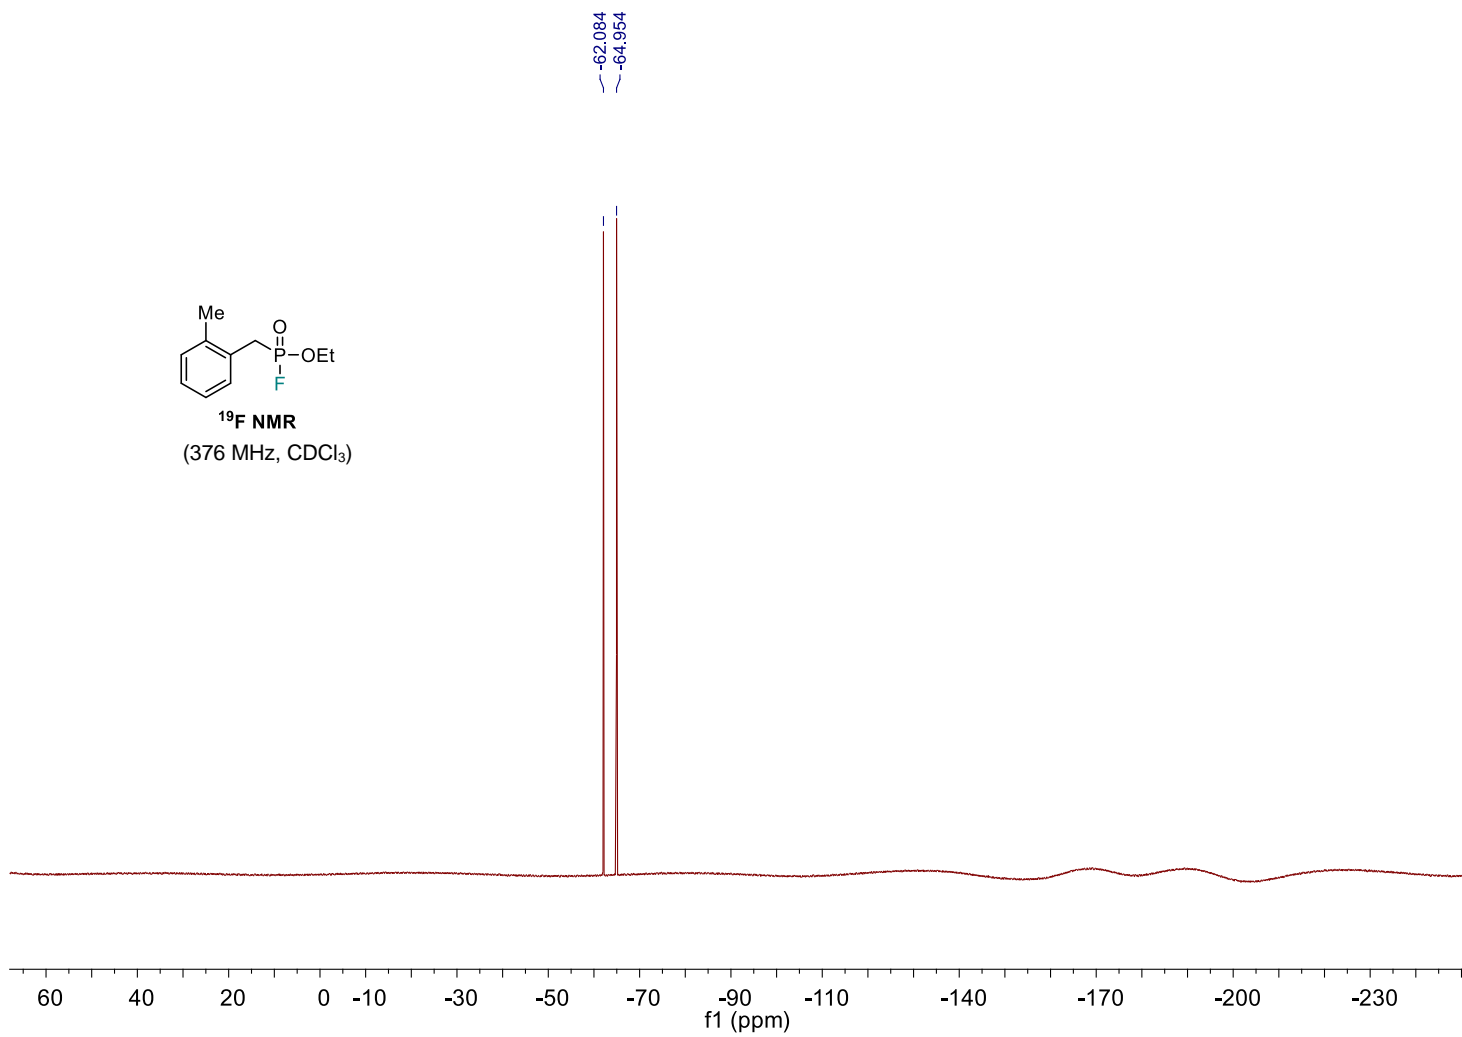



8.051  
8.030  
7.620  
7.601  
7.582  
7.497  
7.493  
7.489  
7.478  
7.474  
7.471

4.252  
4.235  
4.232  
4.218  
4.215  
4.211  
4.194  
4.176  
3.967  
3.956  
3.929  
3.919  
3.907  
3.896  
3.875  
3.869  
3.859  
3.838  
3.830  
3.815  
3.807  
3.777  
3.770

1.304  
1.286  
1.268

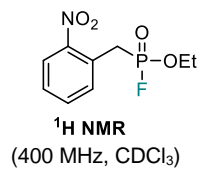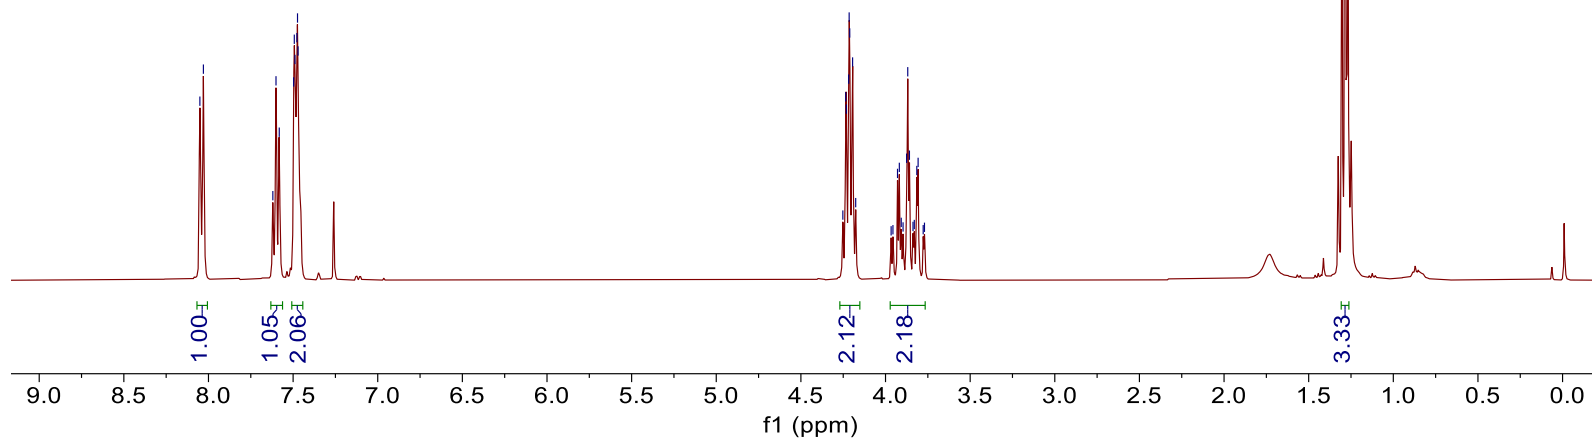

S305

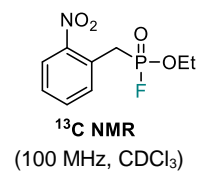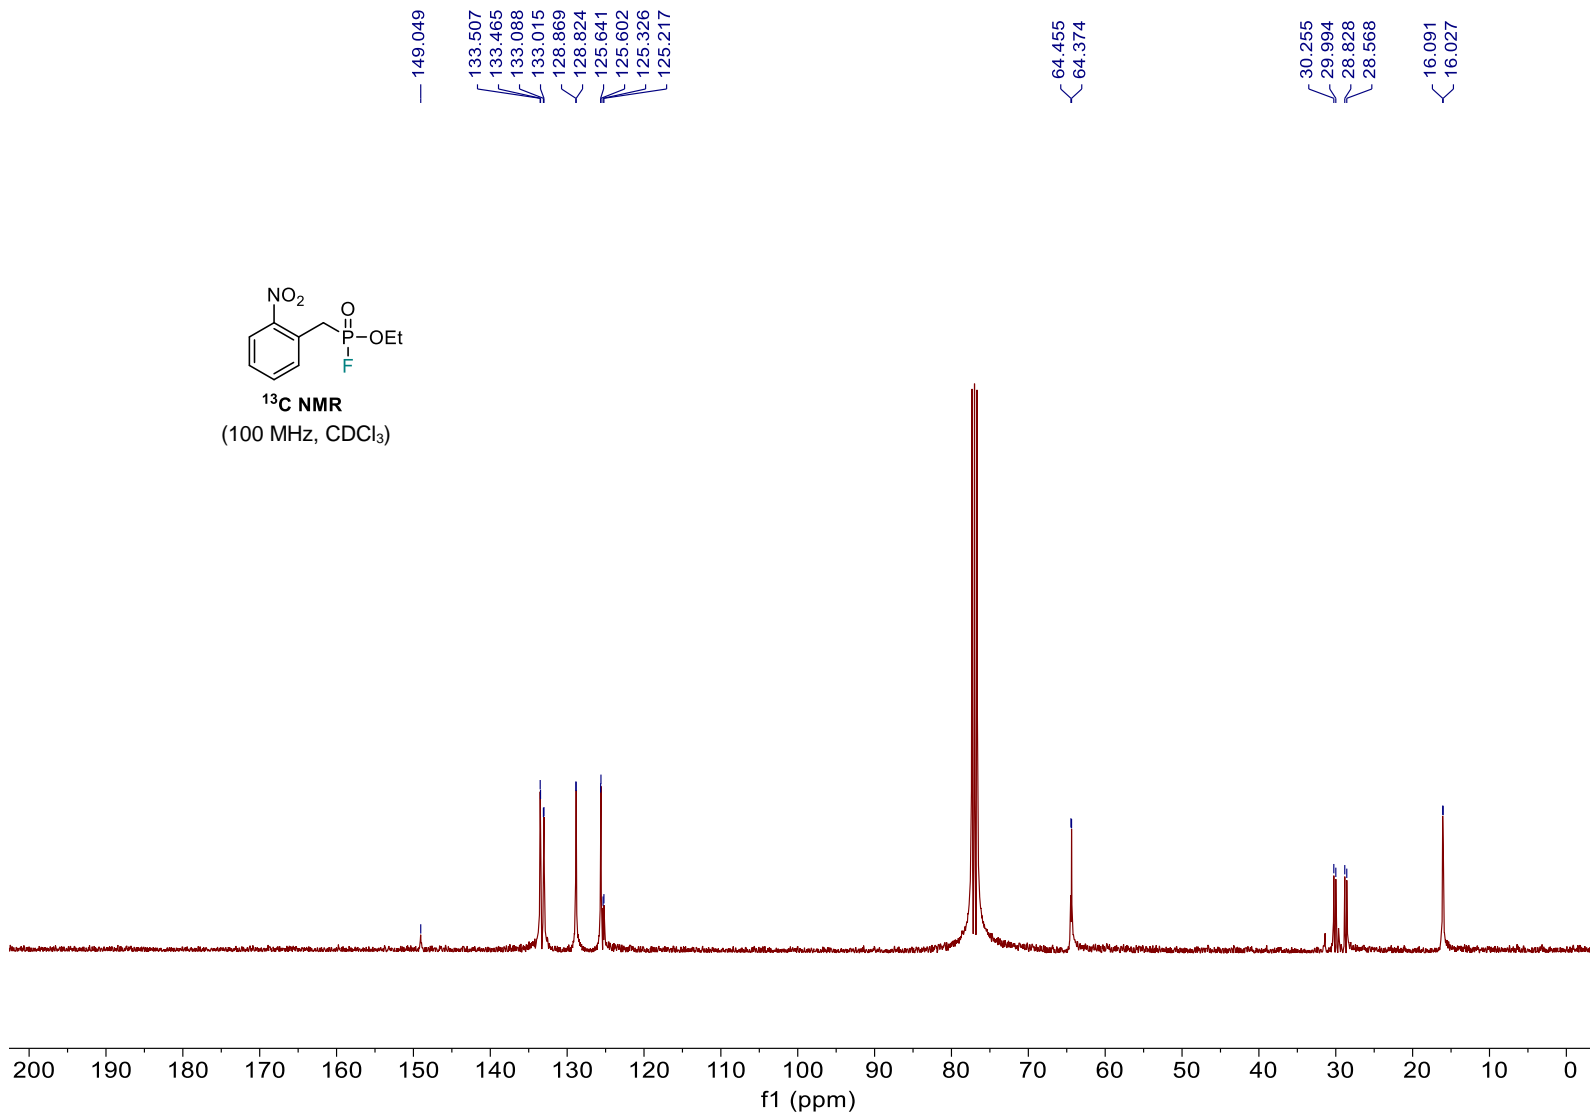

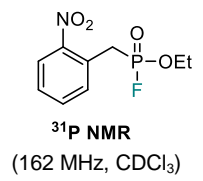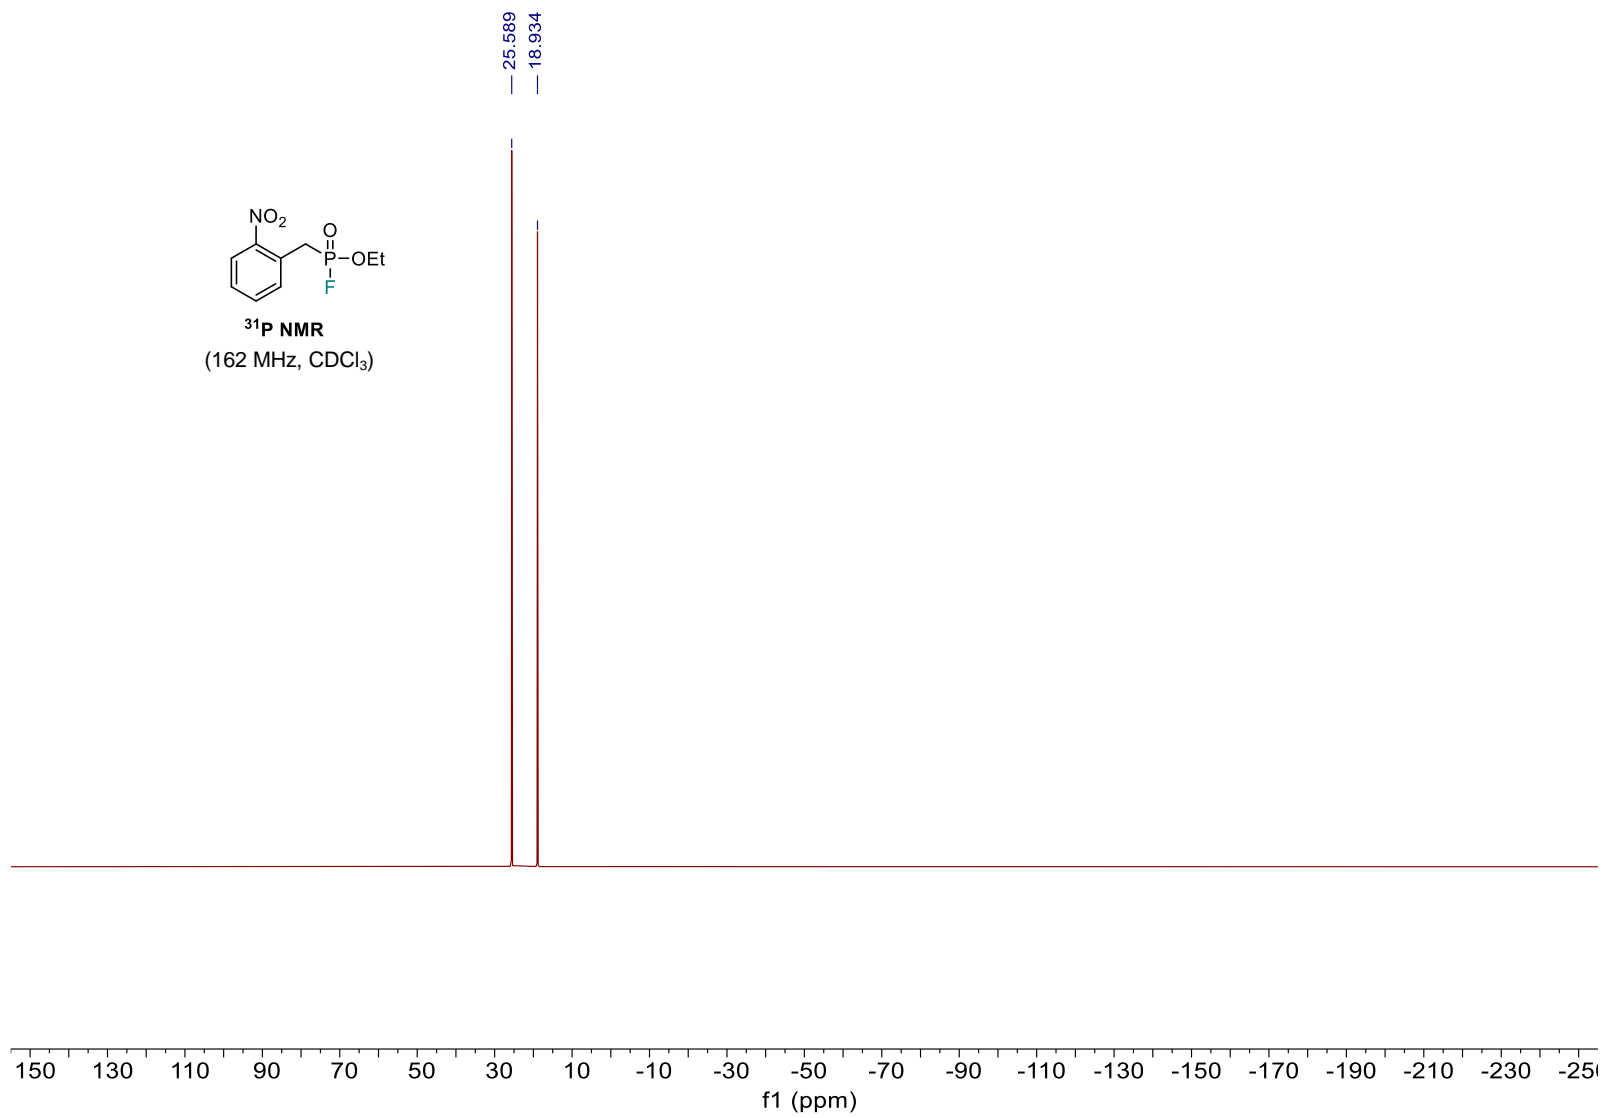

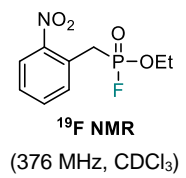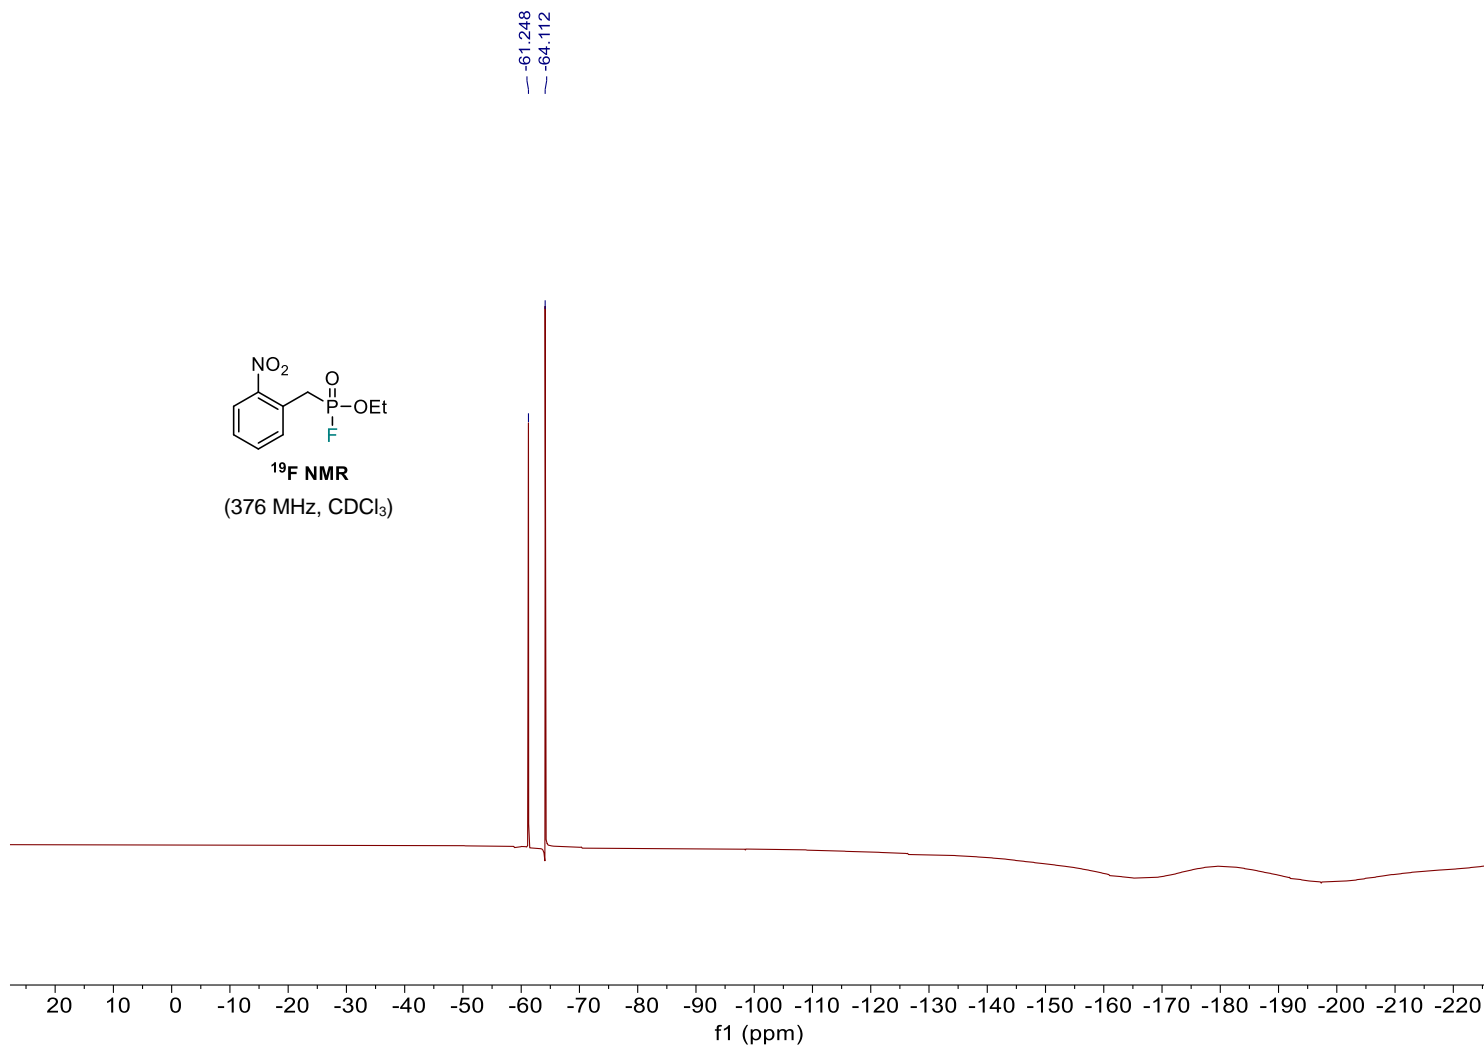

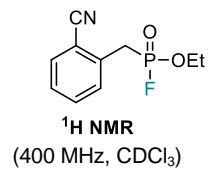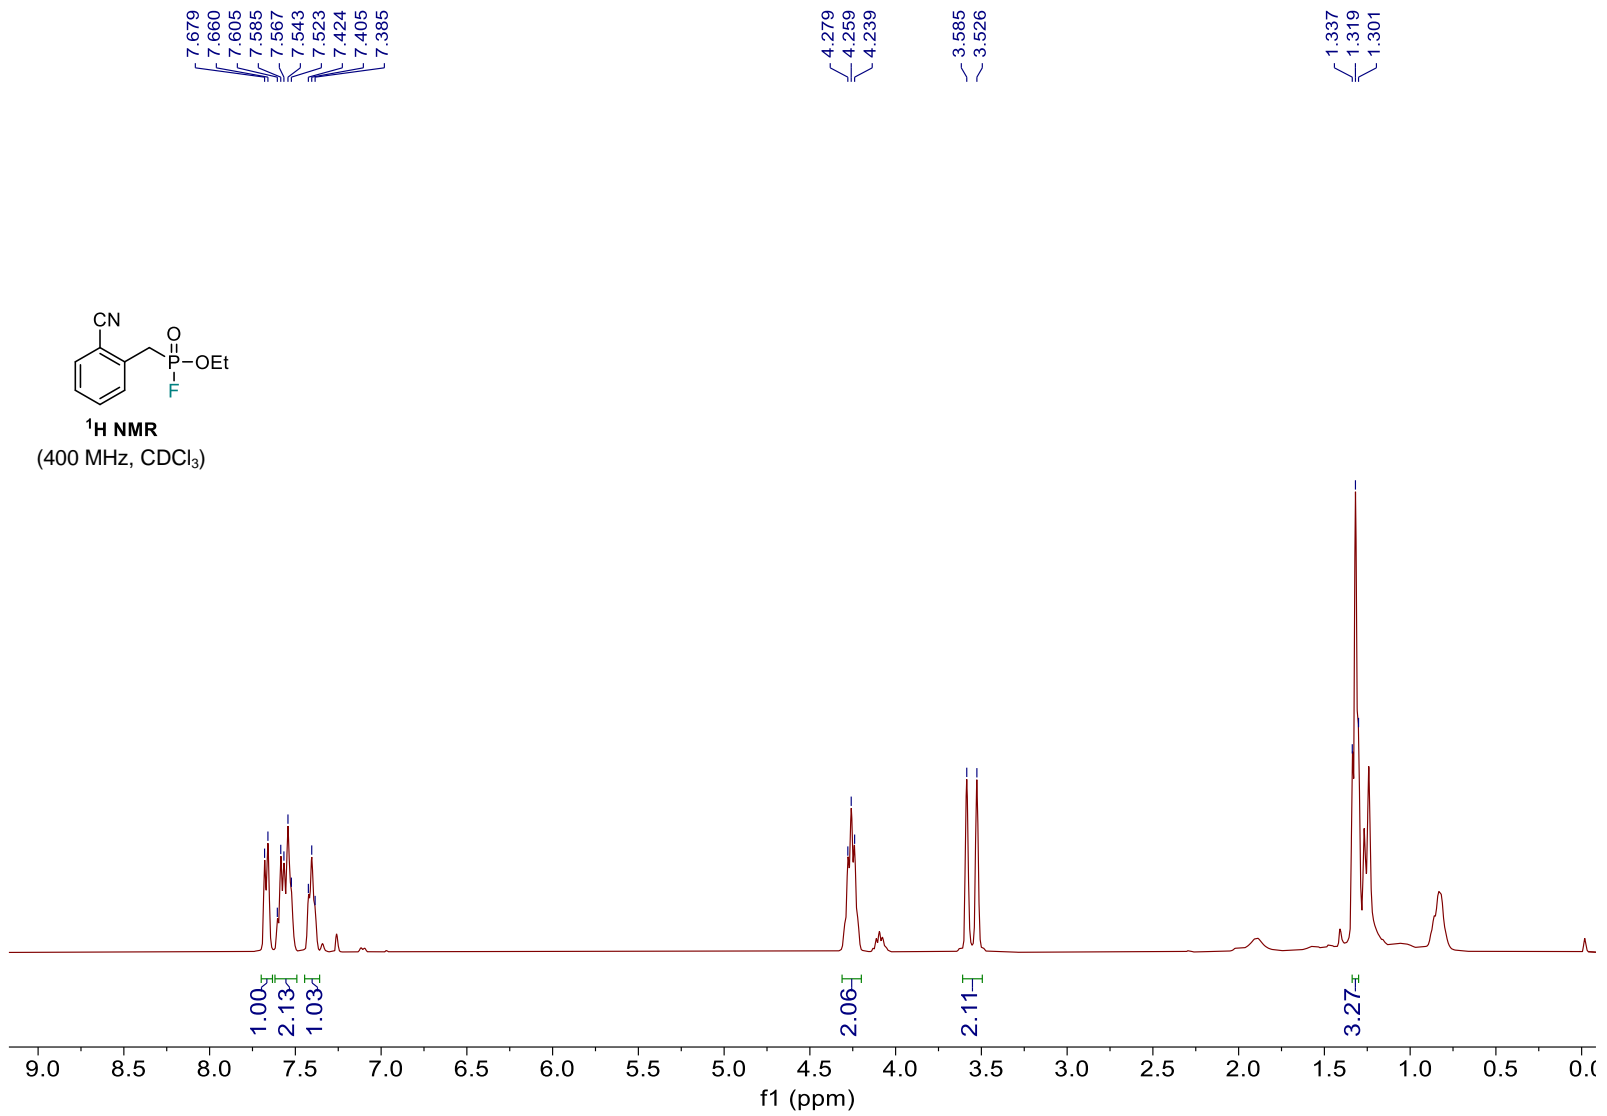

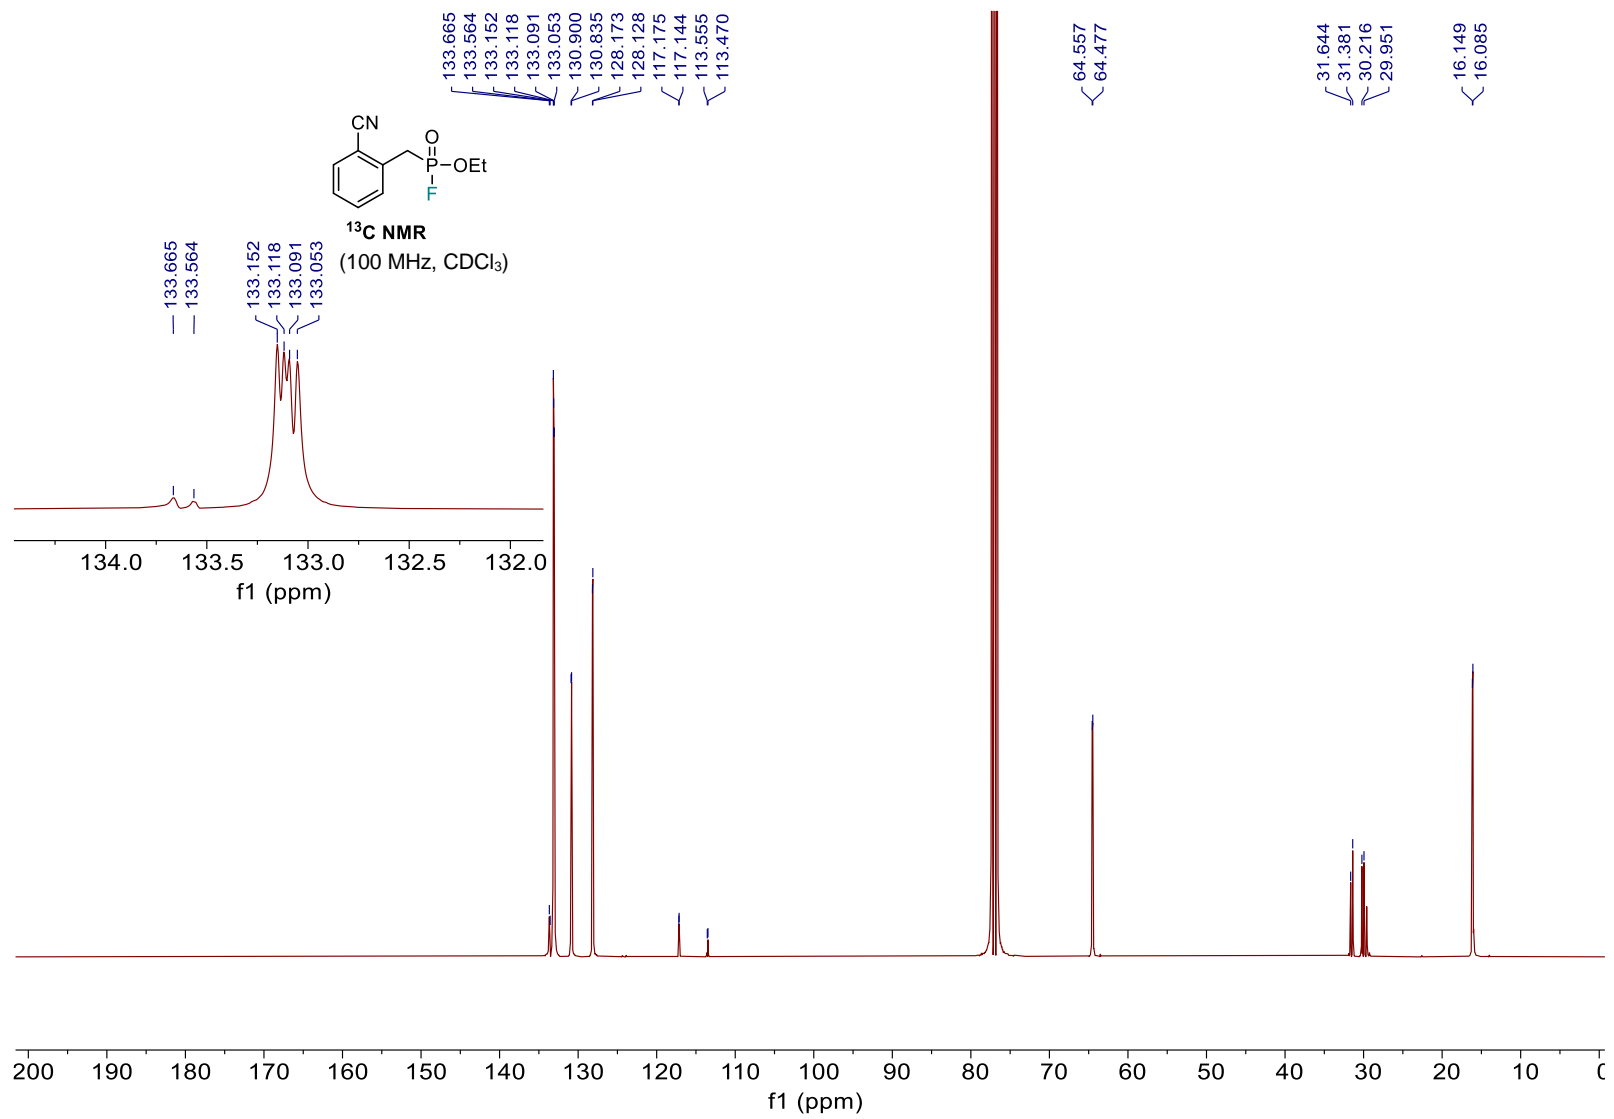

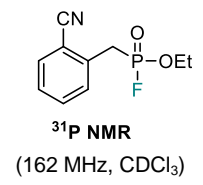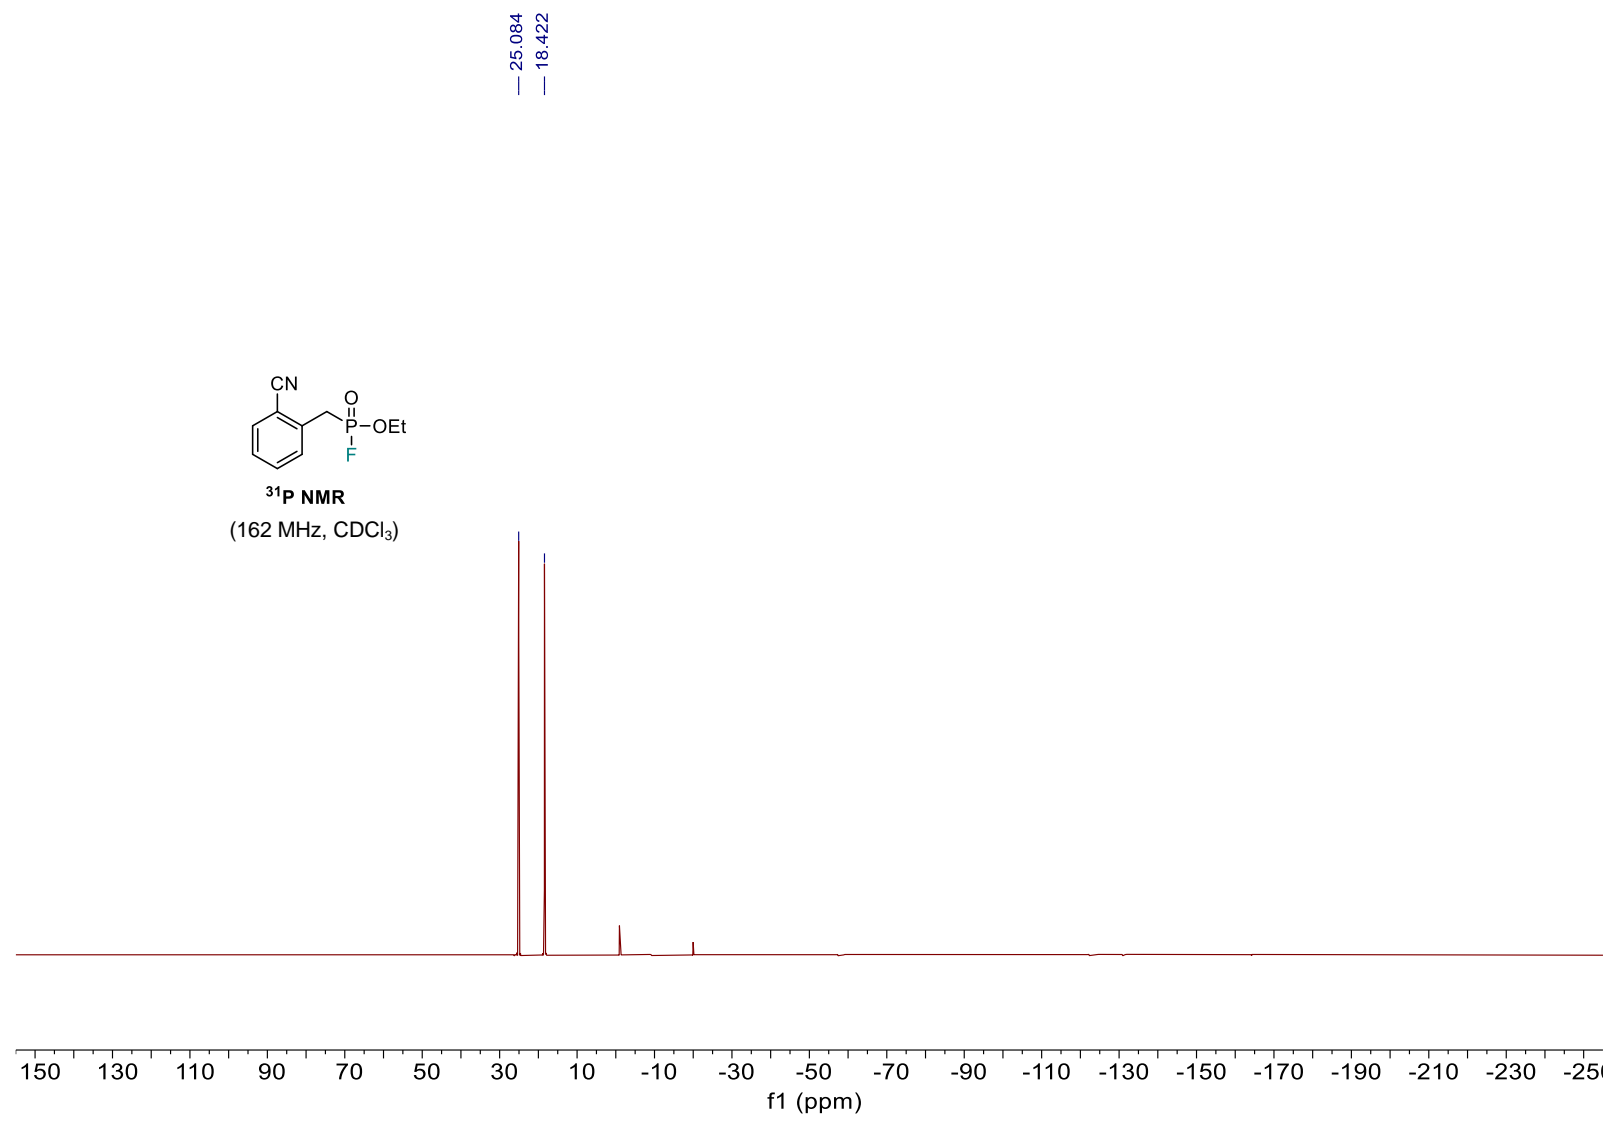

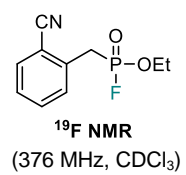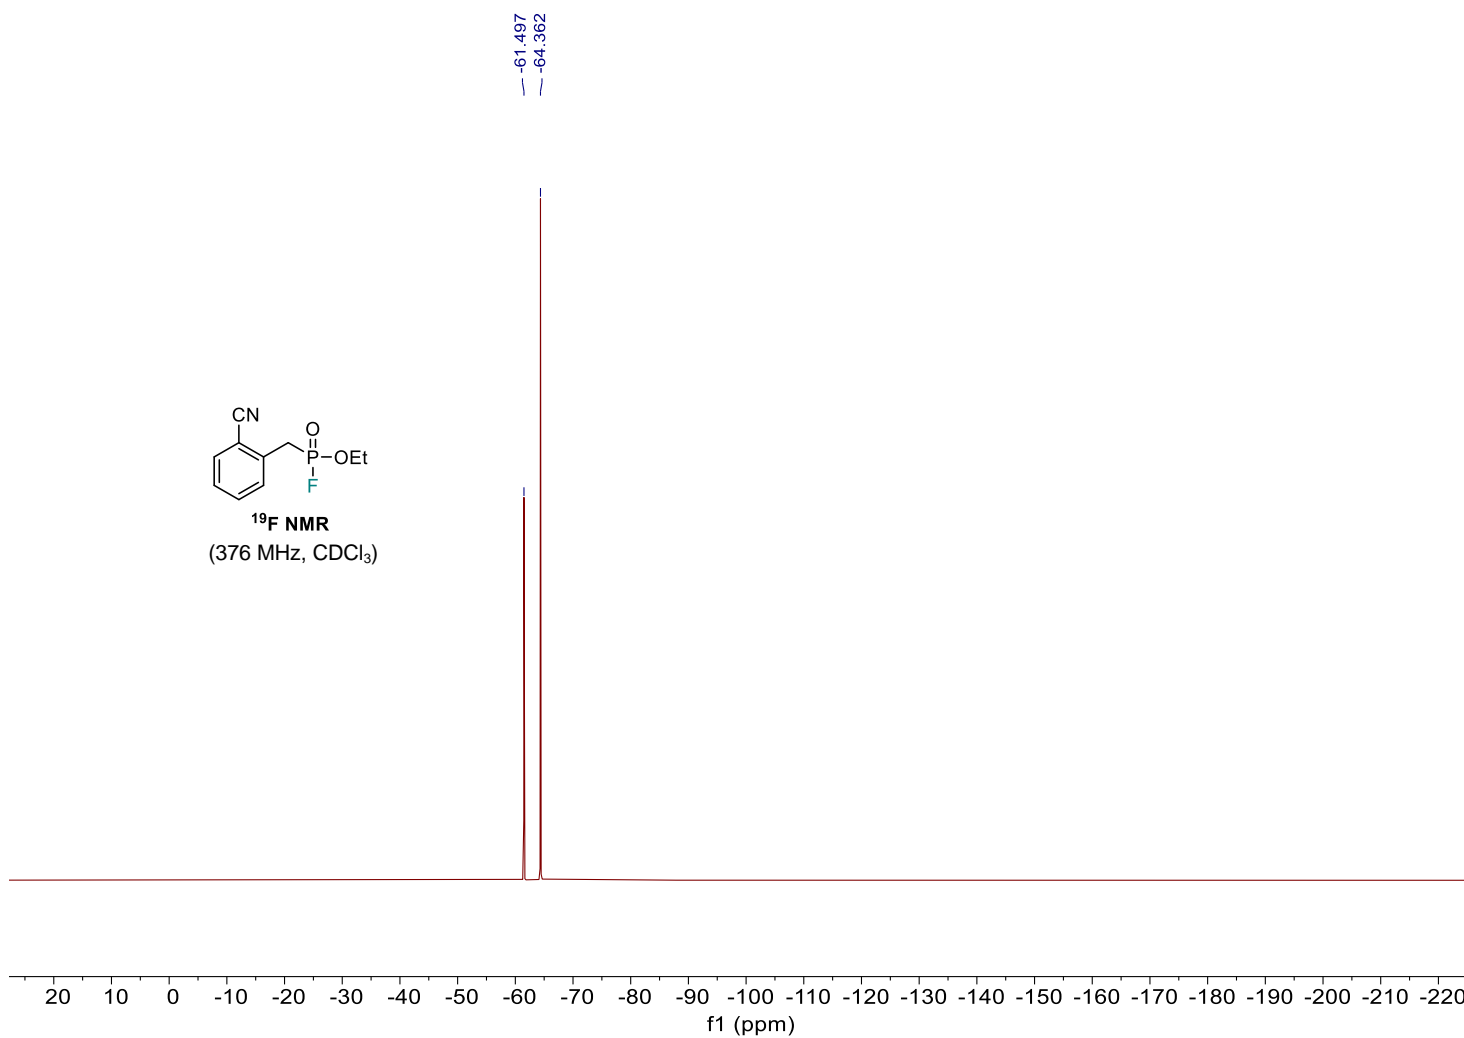



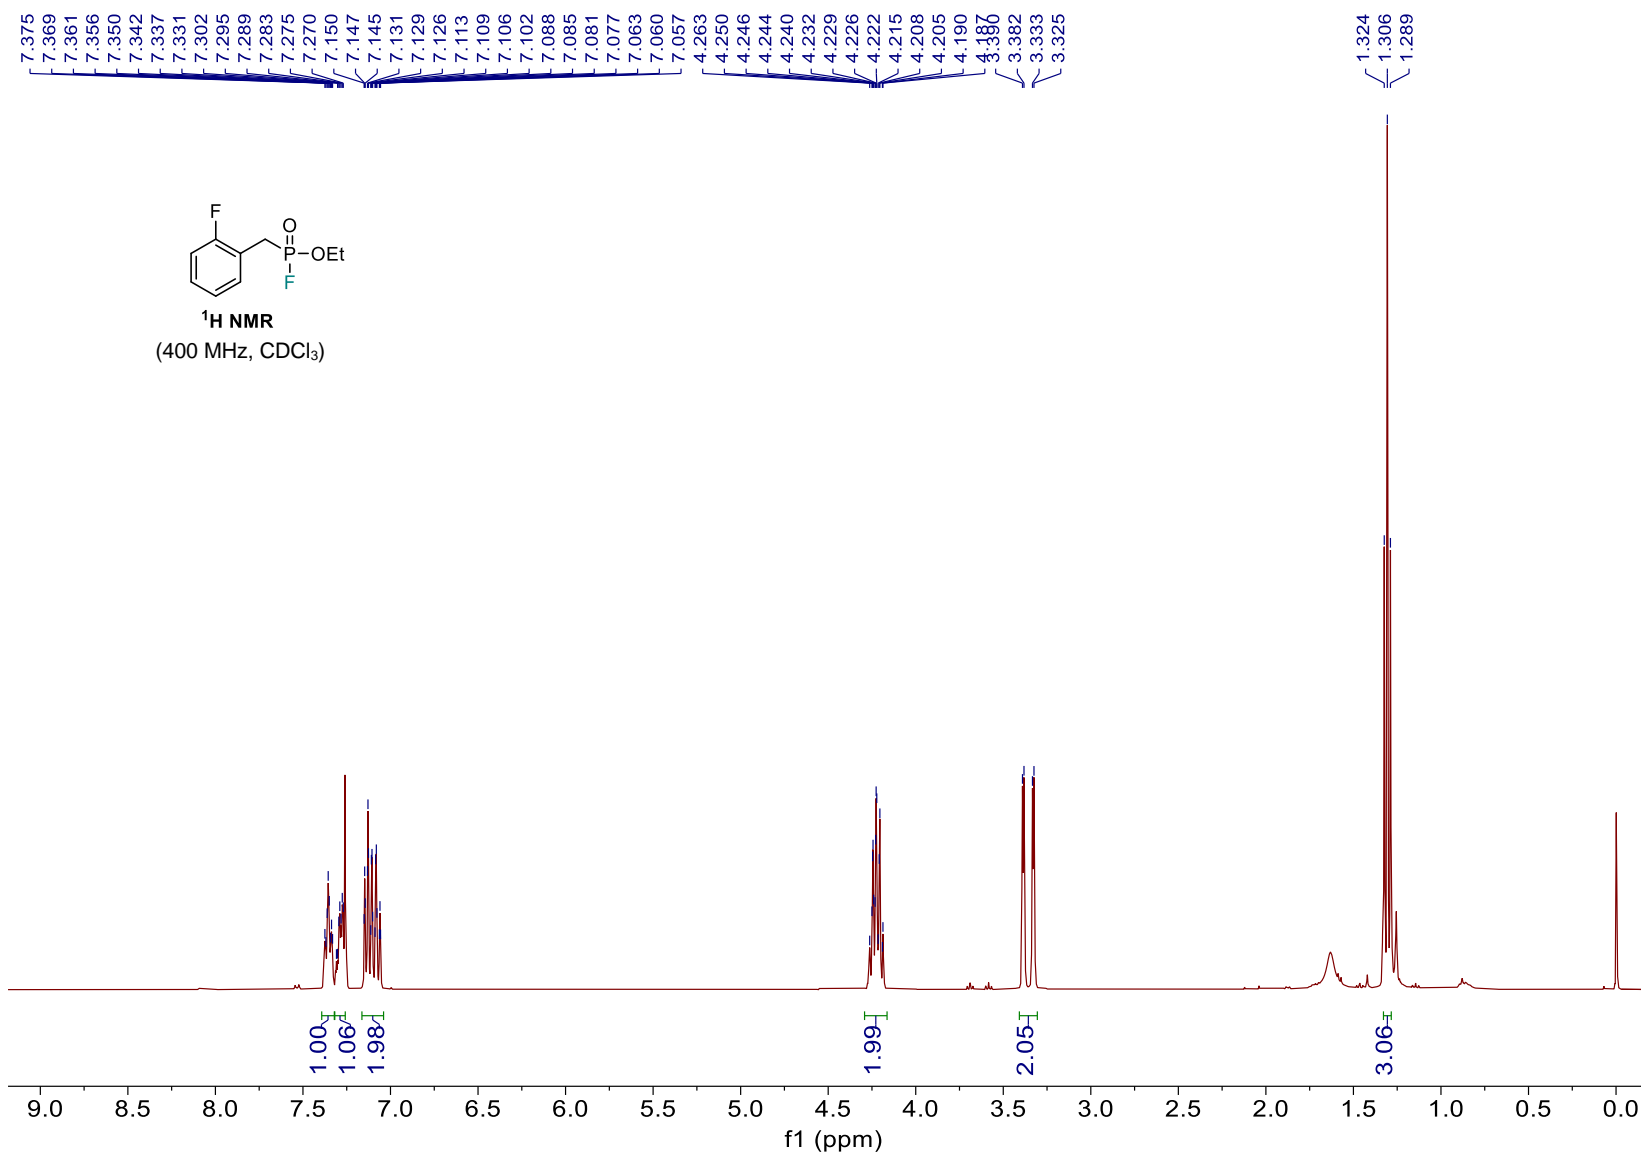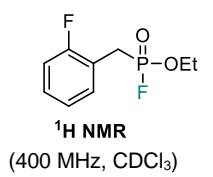

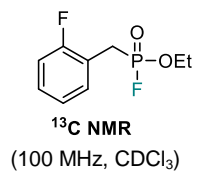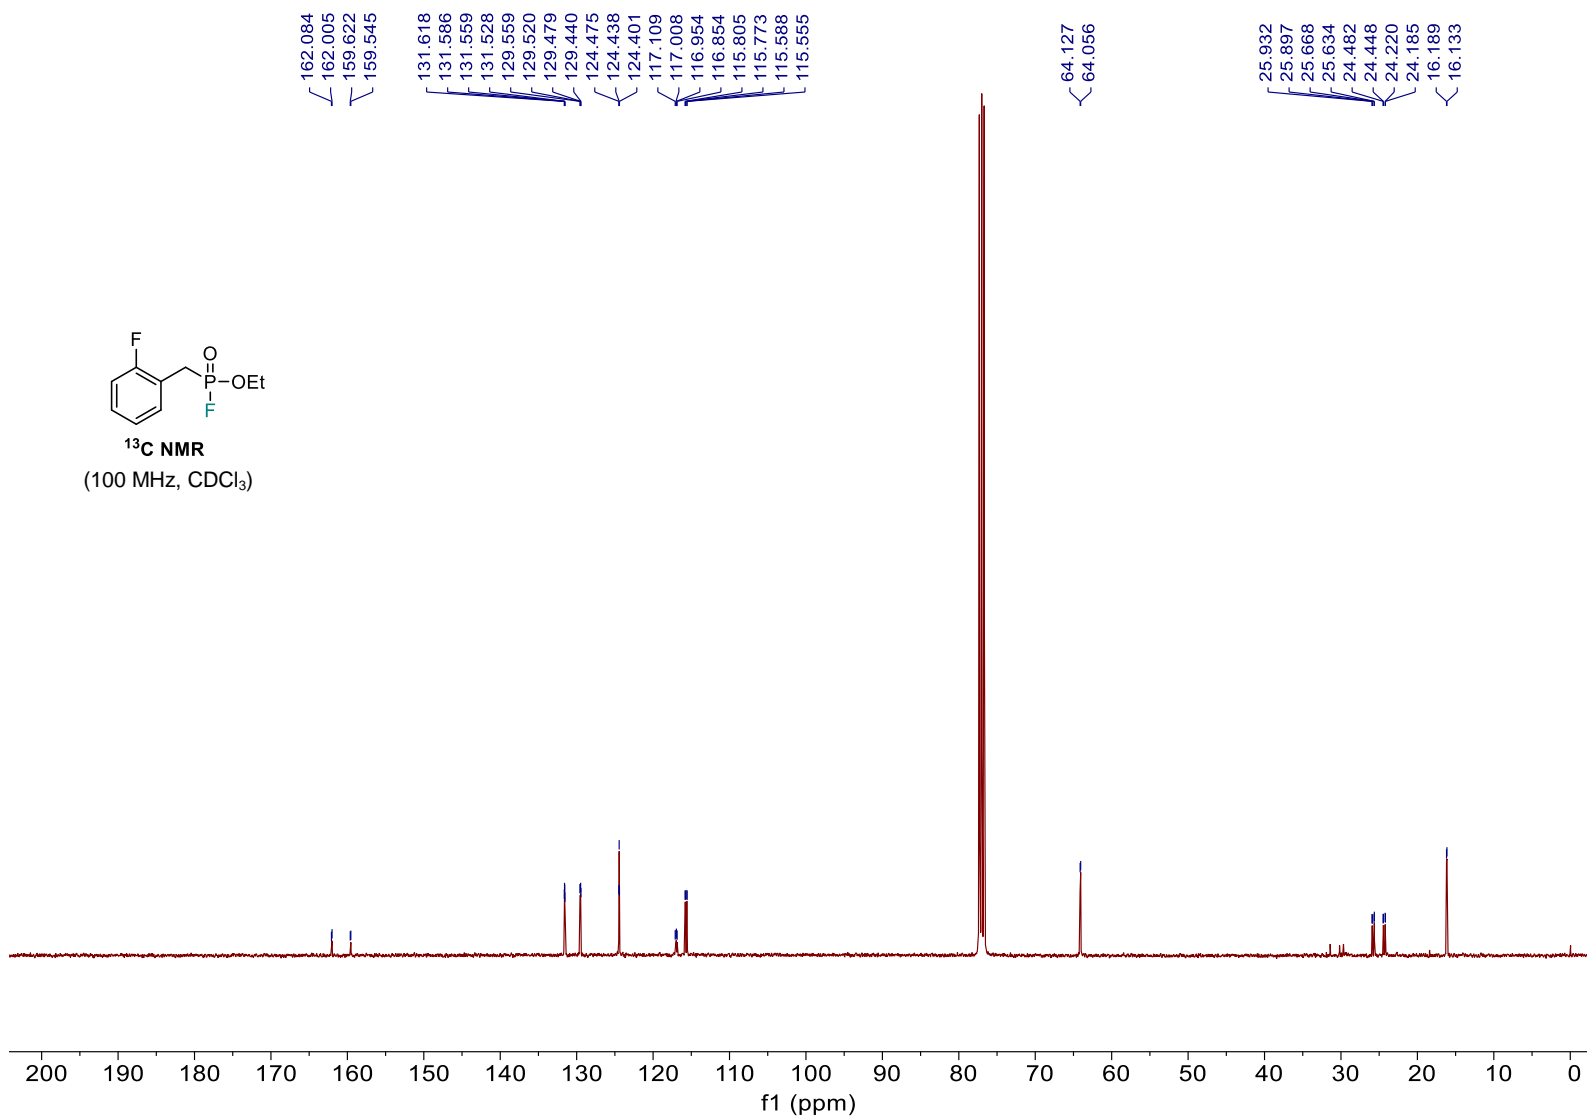

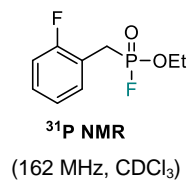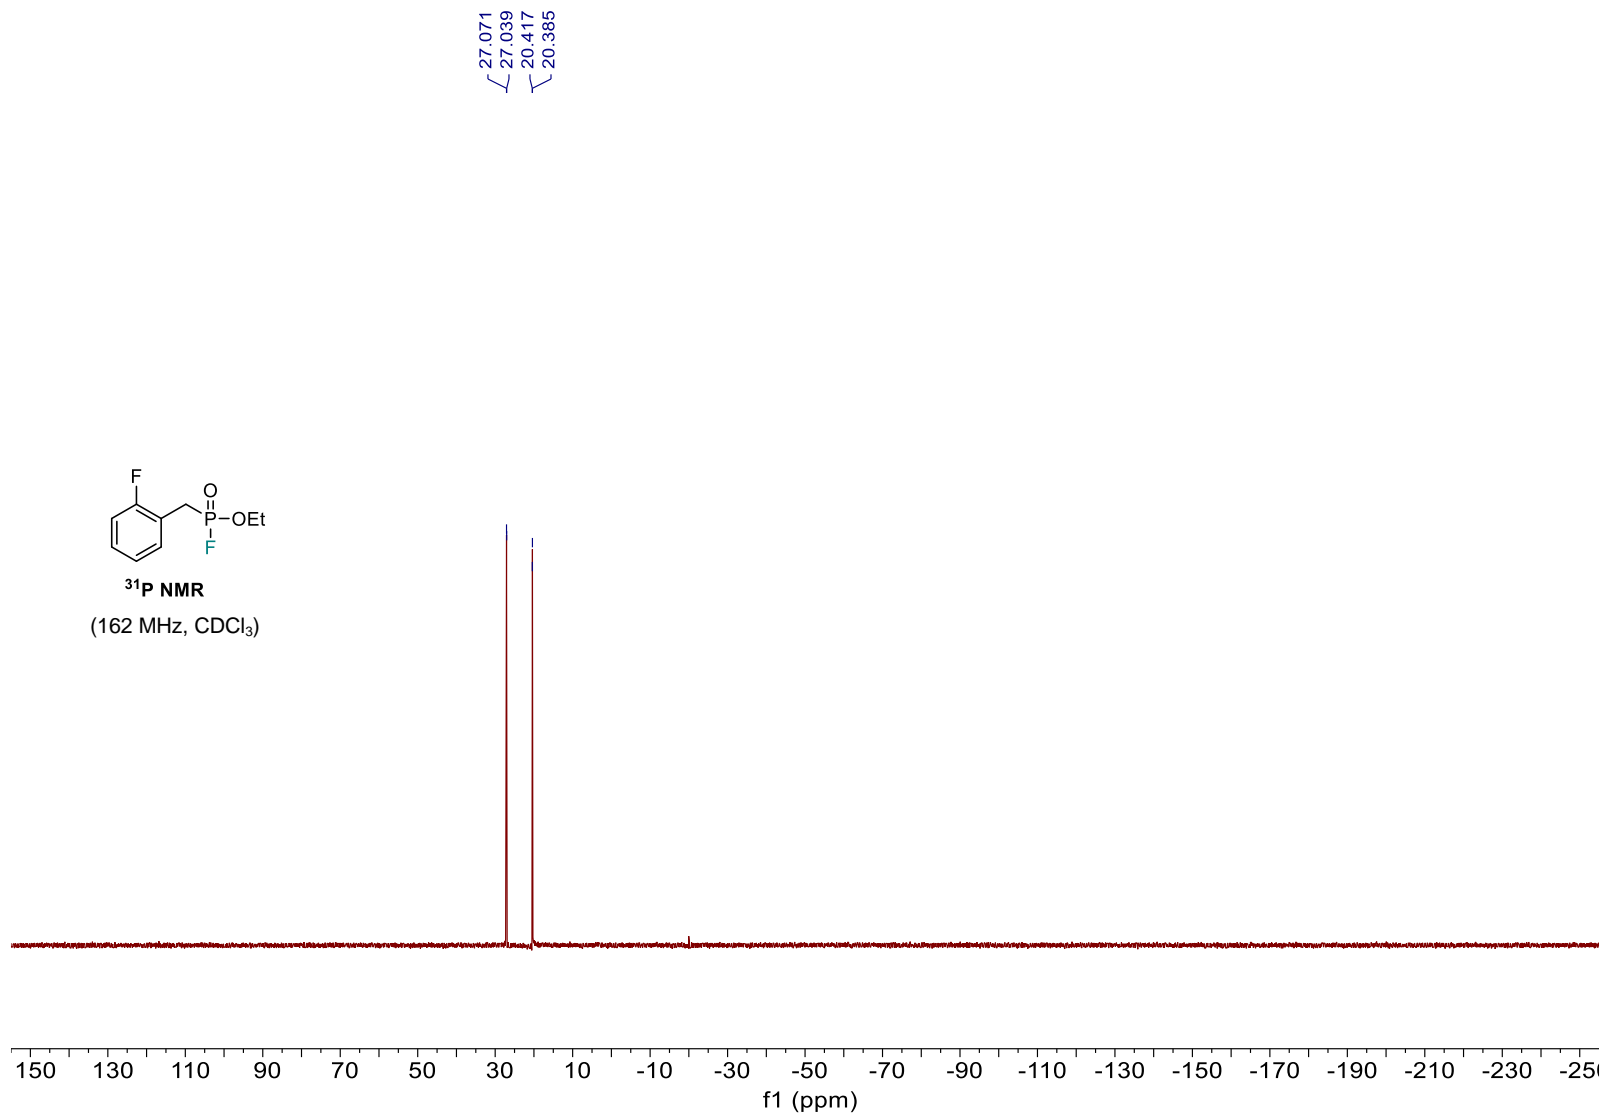

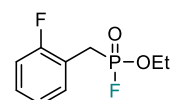

**<sup>19</sup>F NMR**  
(376 MHz, CDCl<sub>3</sub>)

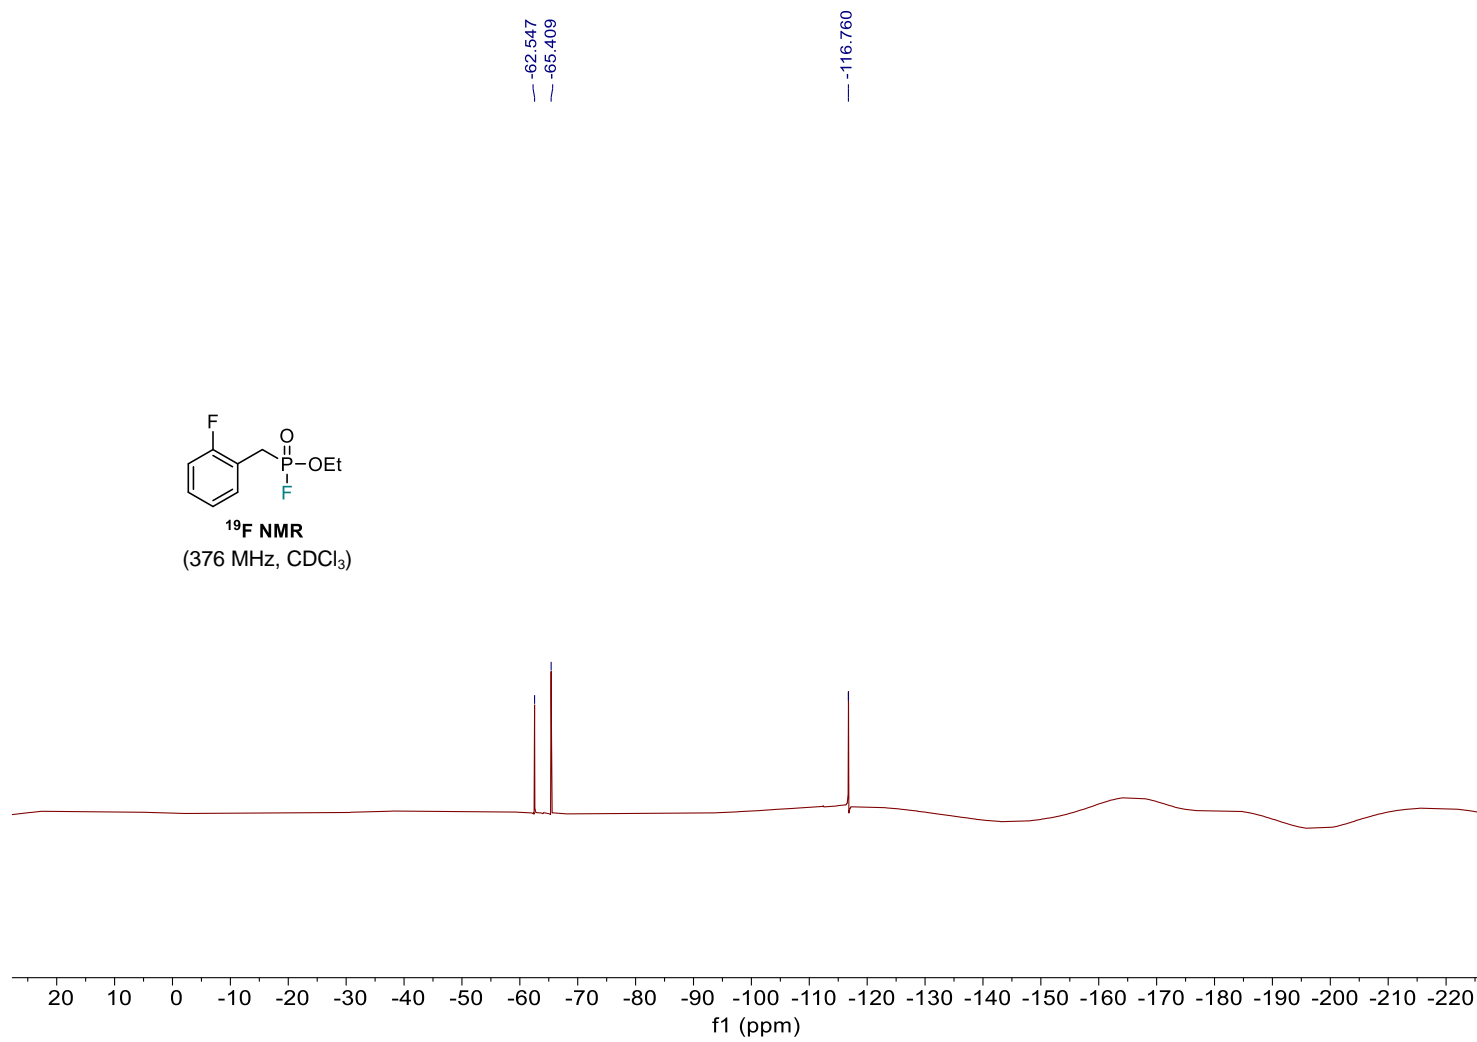

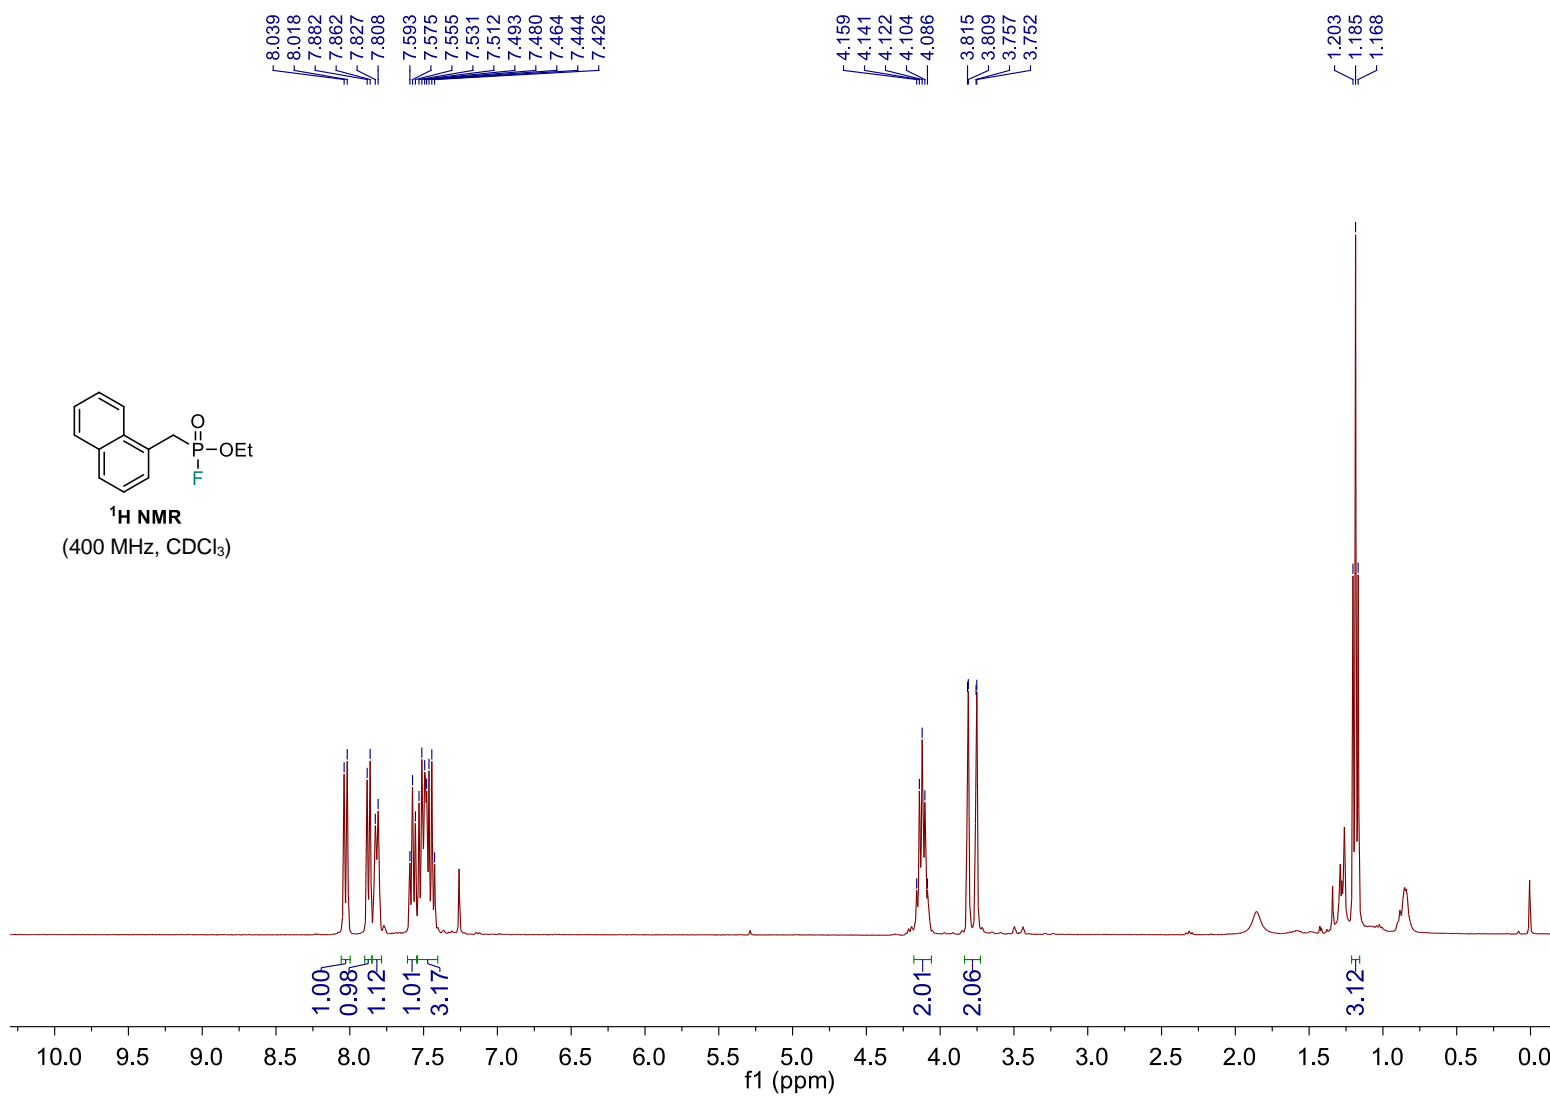

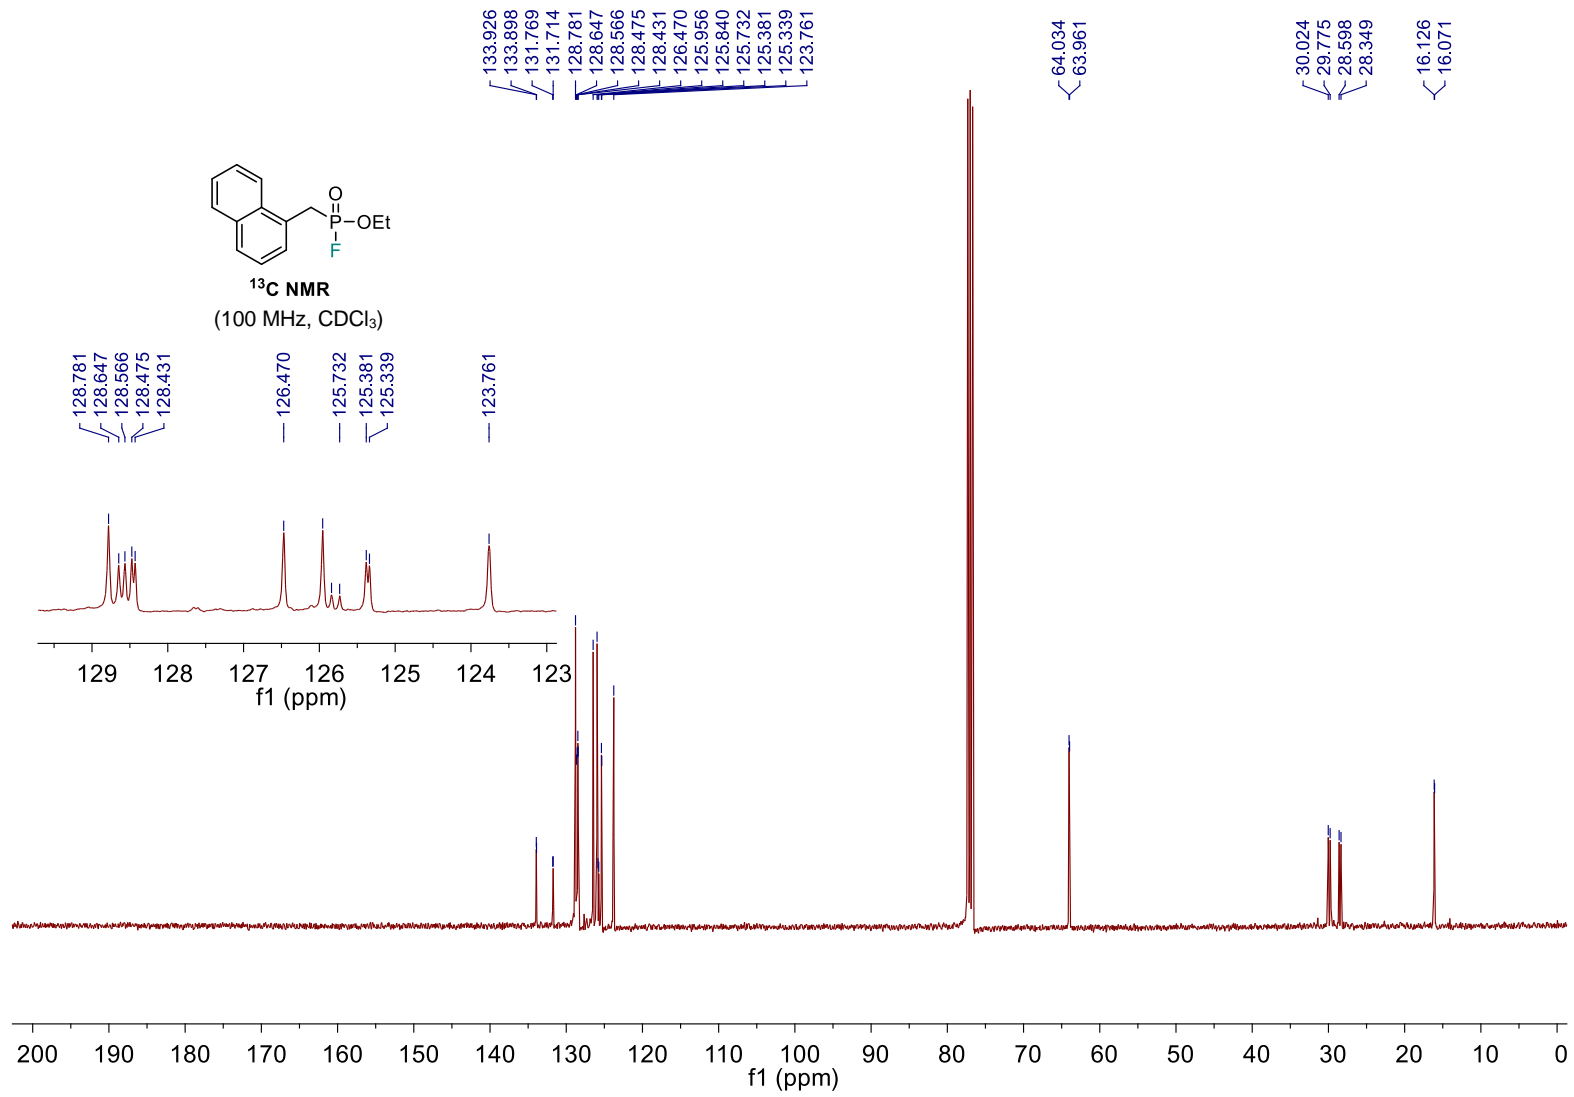

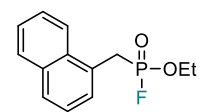

**<sup>31</sup>P NMR**  
(162 MHz, CDCl<sub>3</sub>)

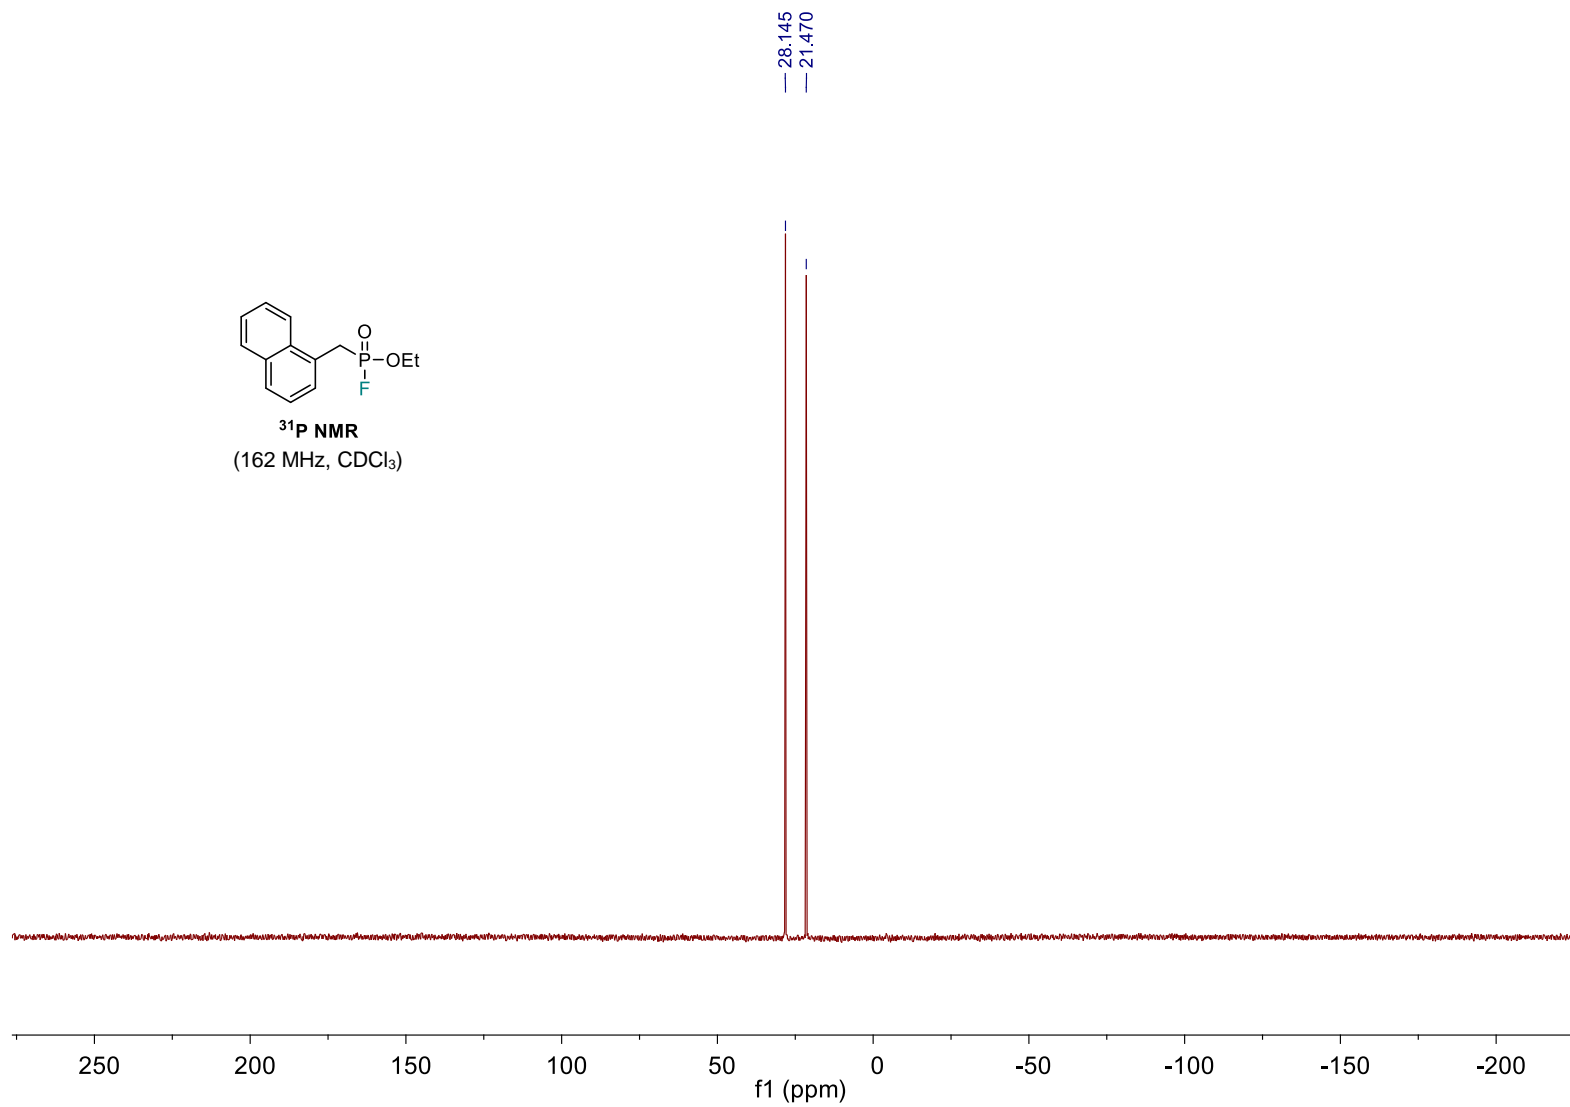

S319

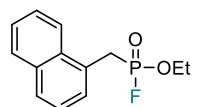

**<sup>19</sup>F NMR**  
(376 MHz, CDCl<sub>3</sub>)

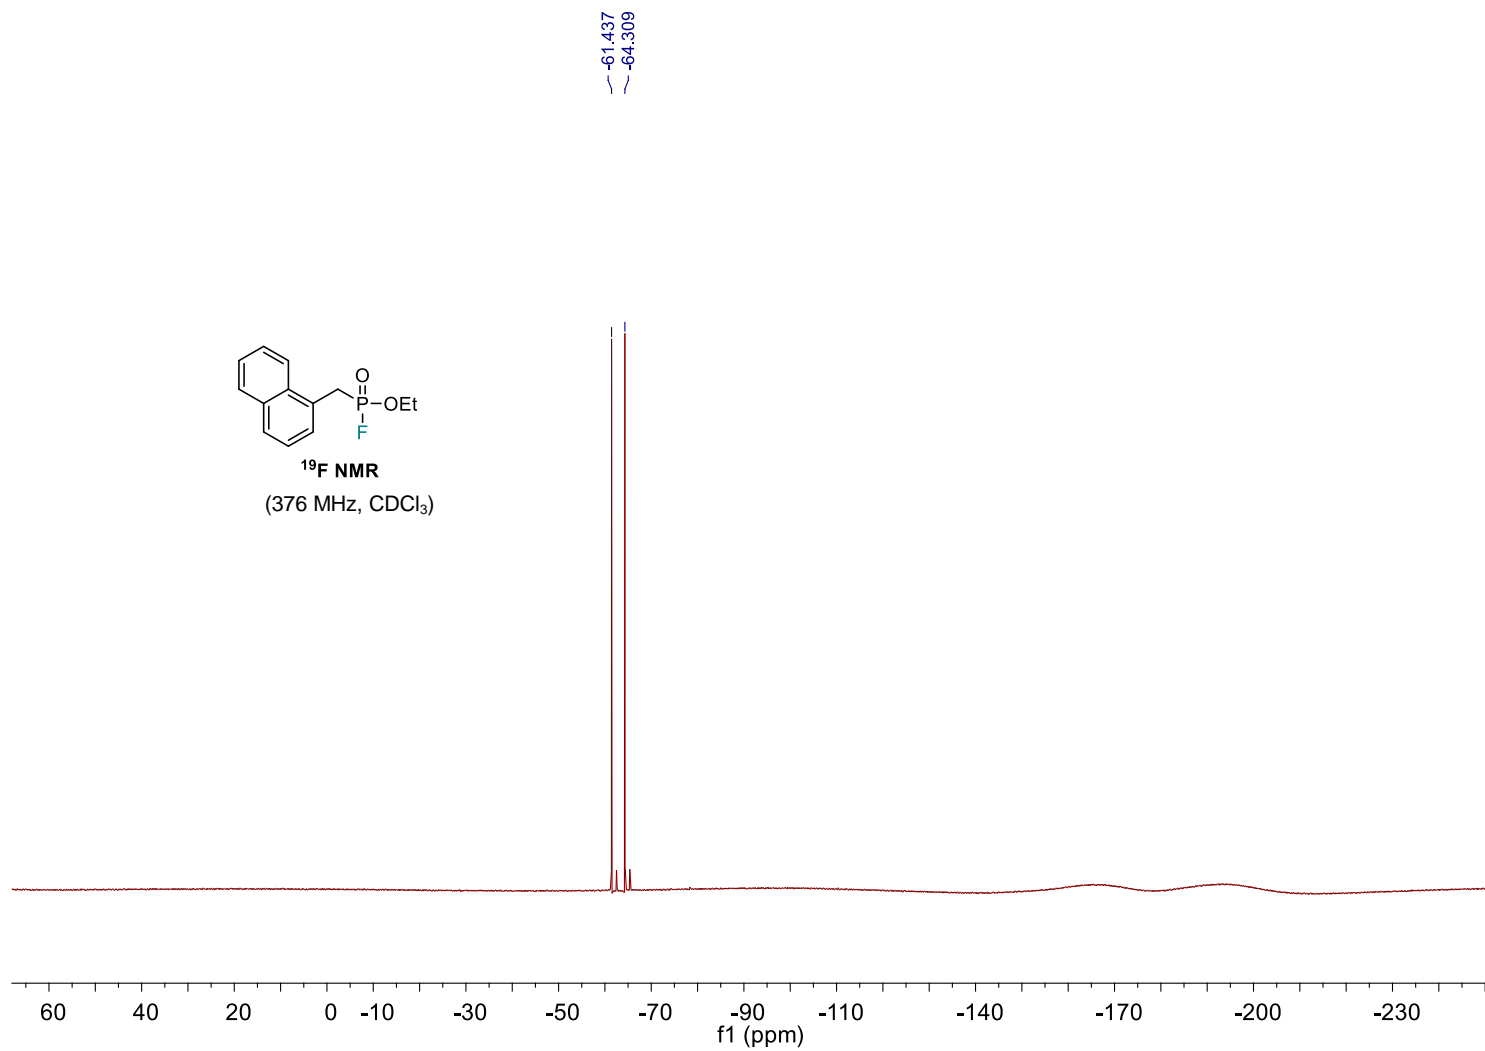



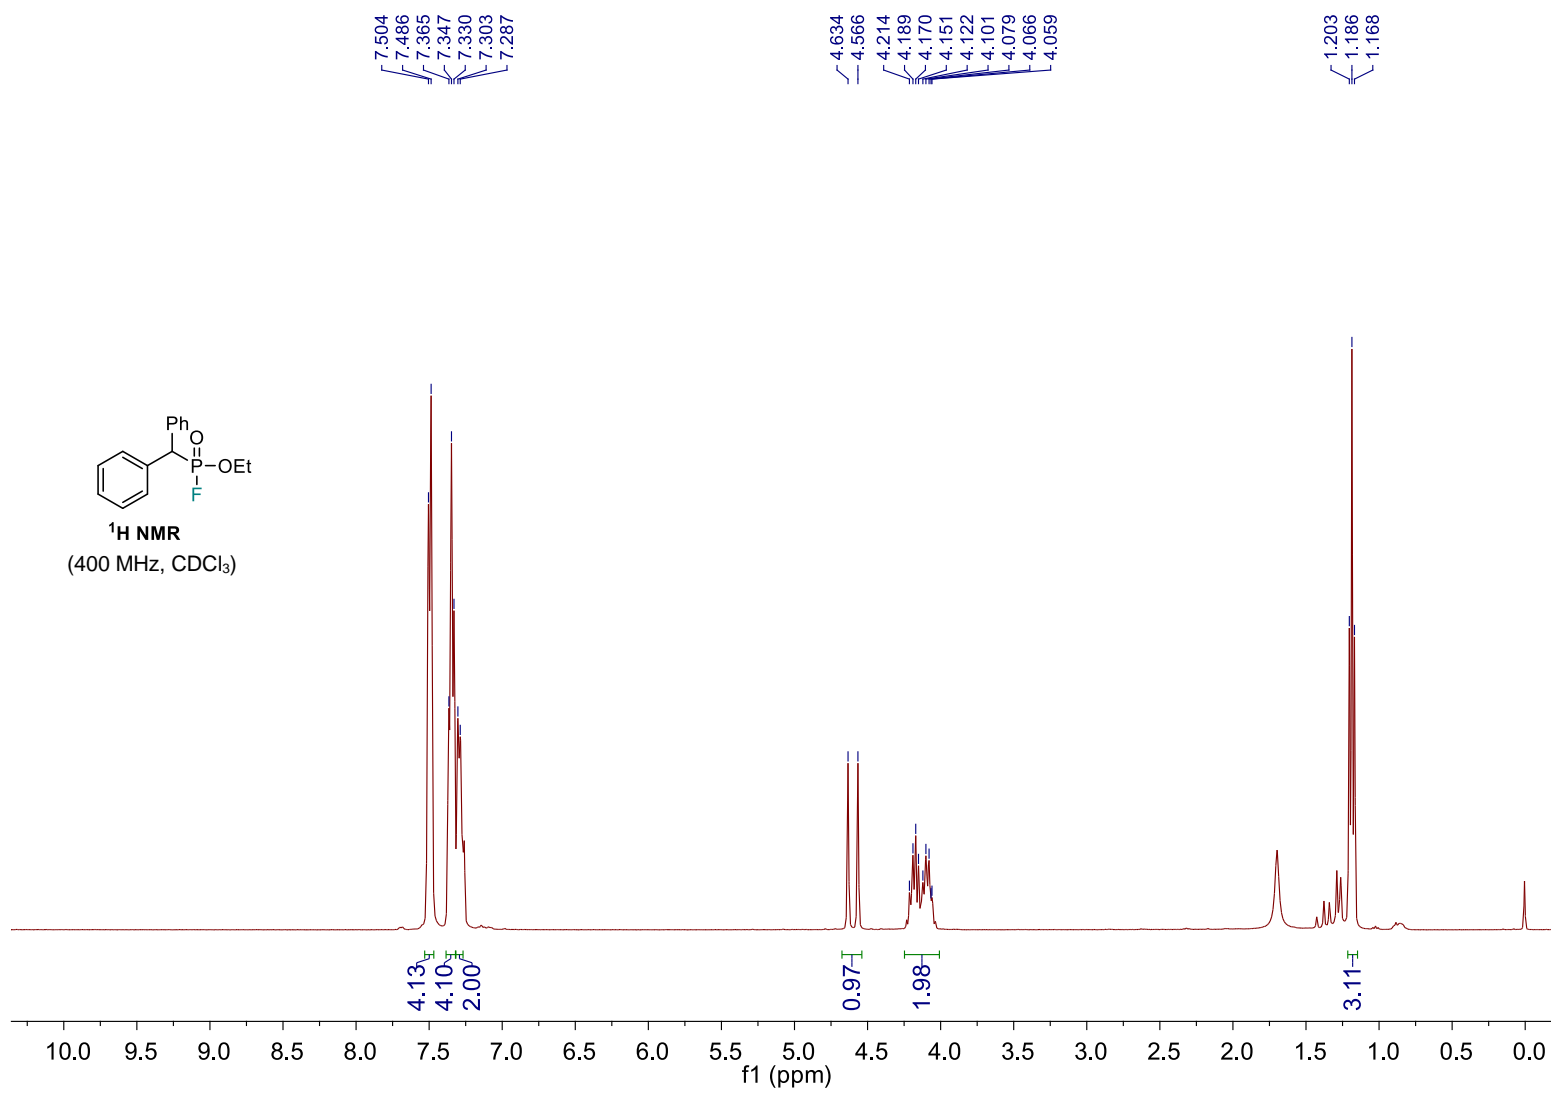

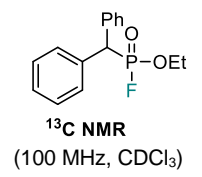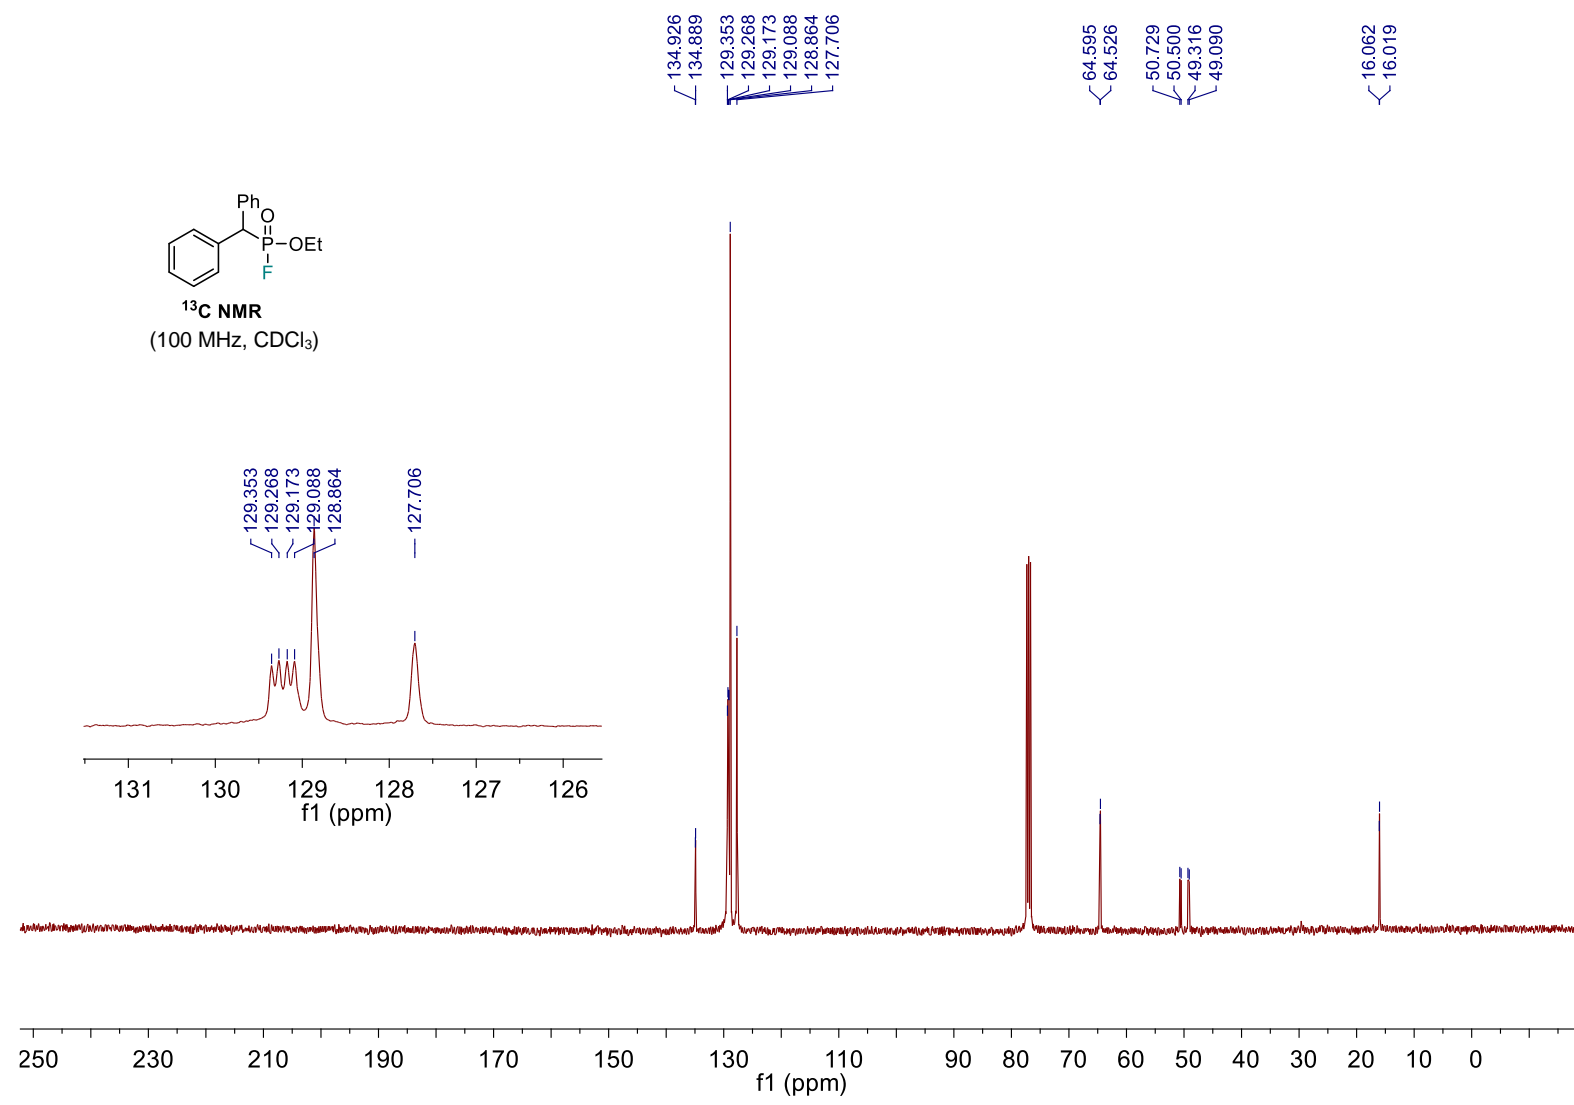

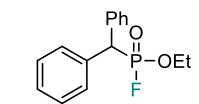

**<sup>31</sup>P NMR**  
(162 MHz, CDCl<sub>3</sub>)

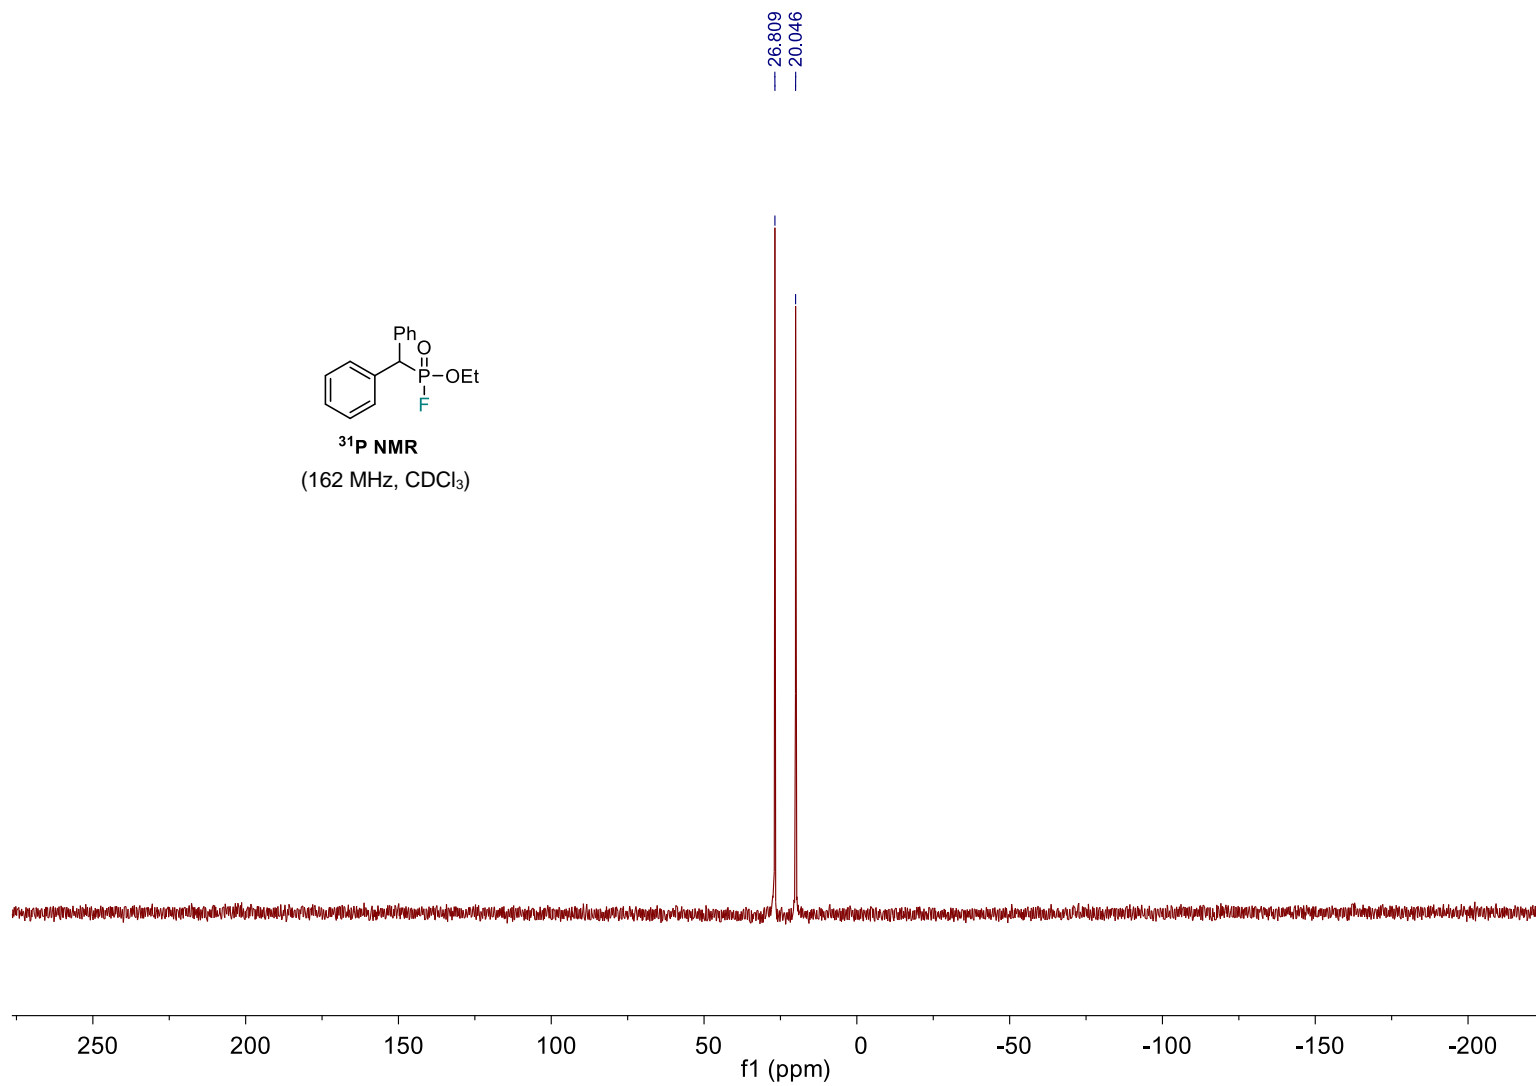

S323

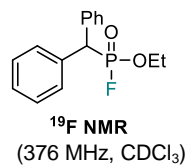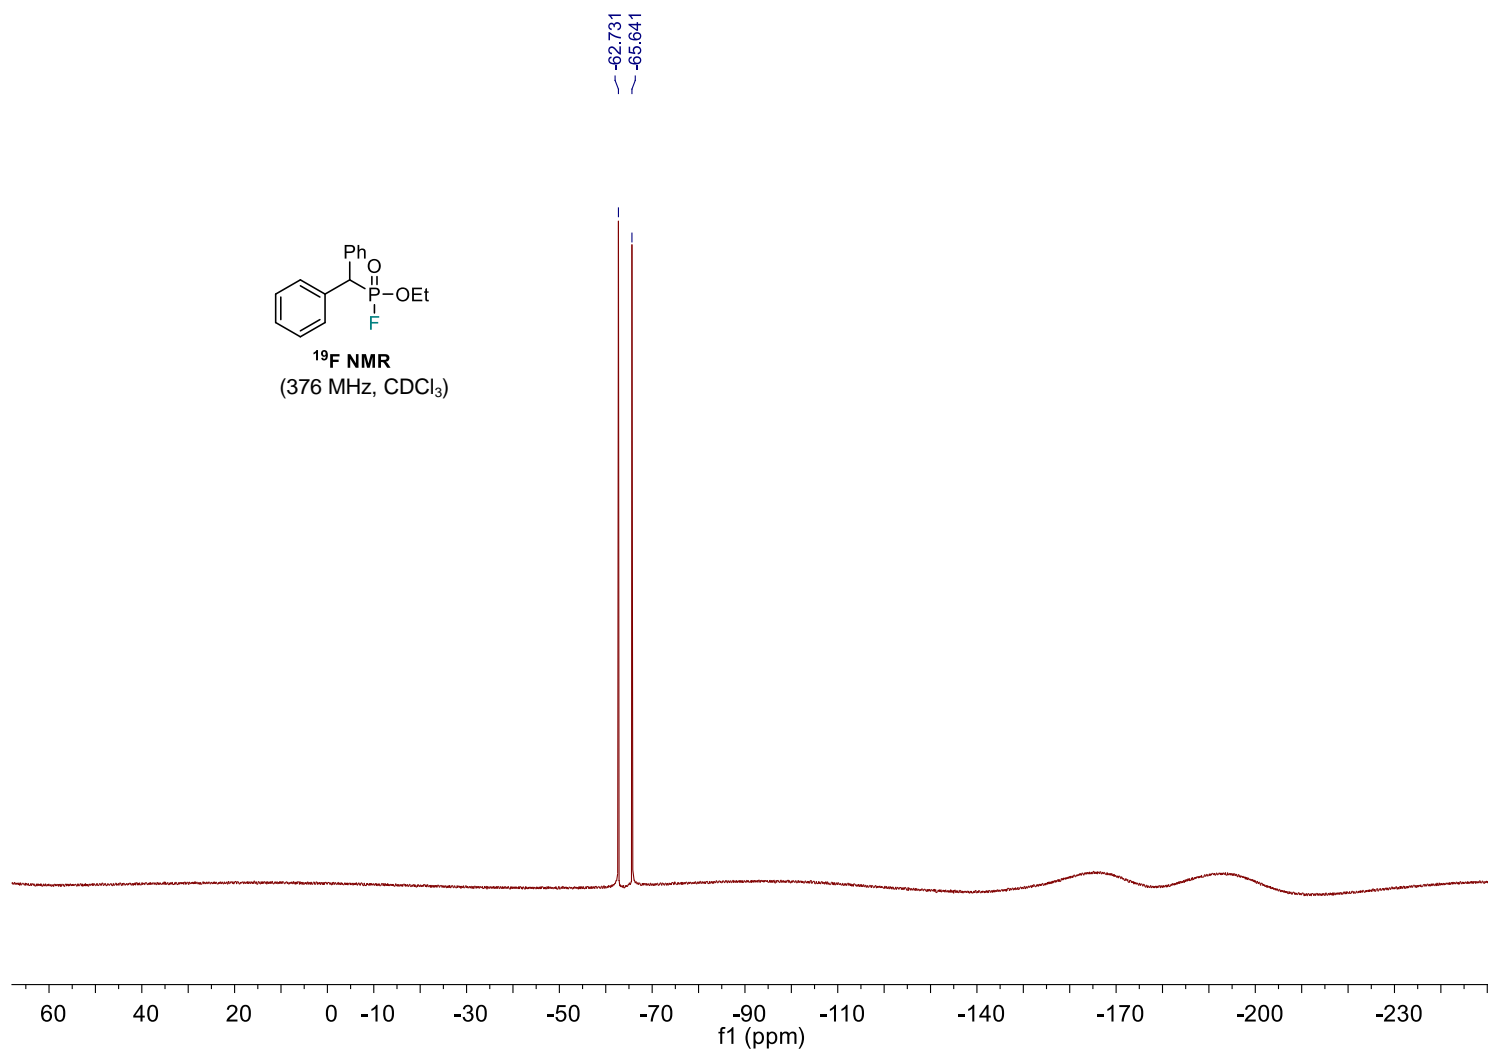



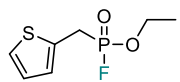

<sup>13</sup>C NMR  
(100 MHz, CDCl<sub>3</sub>)

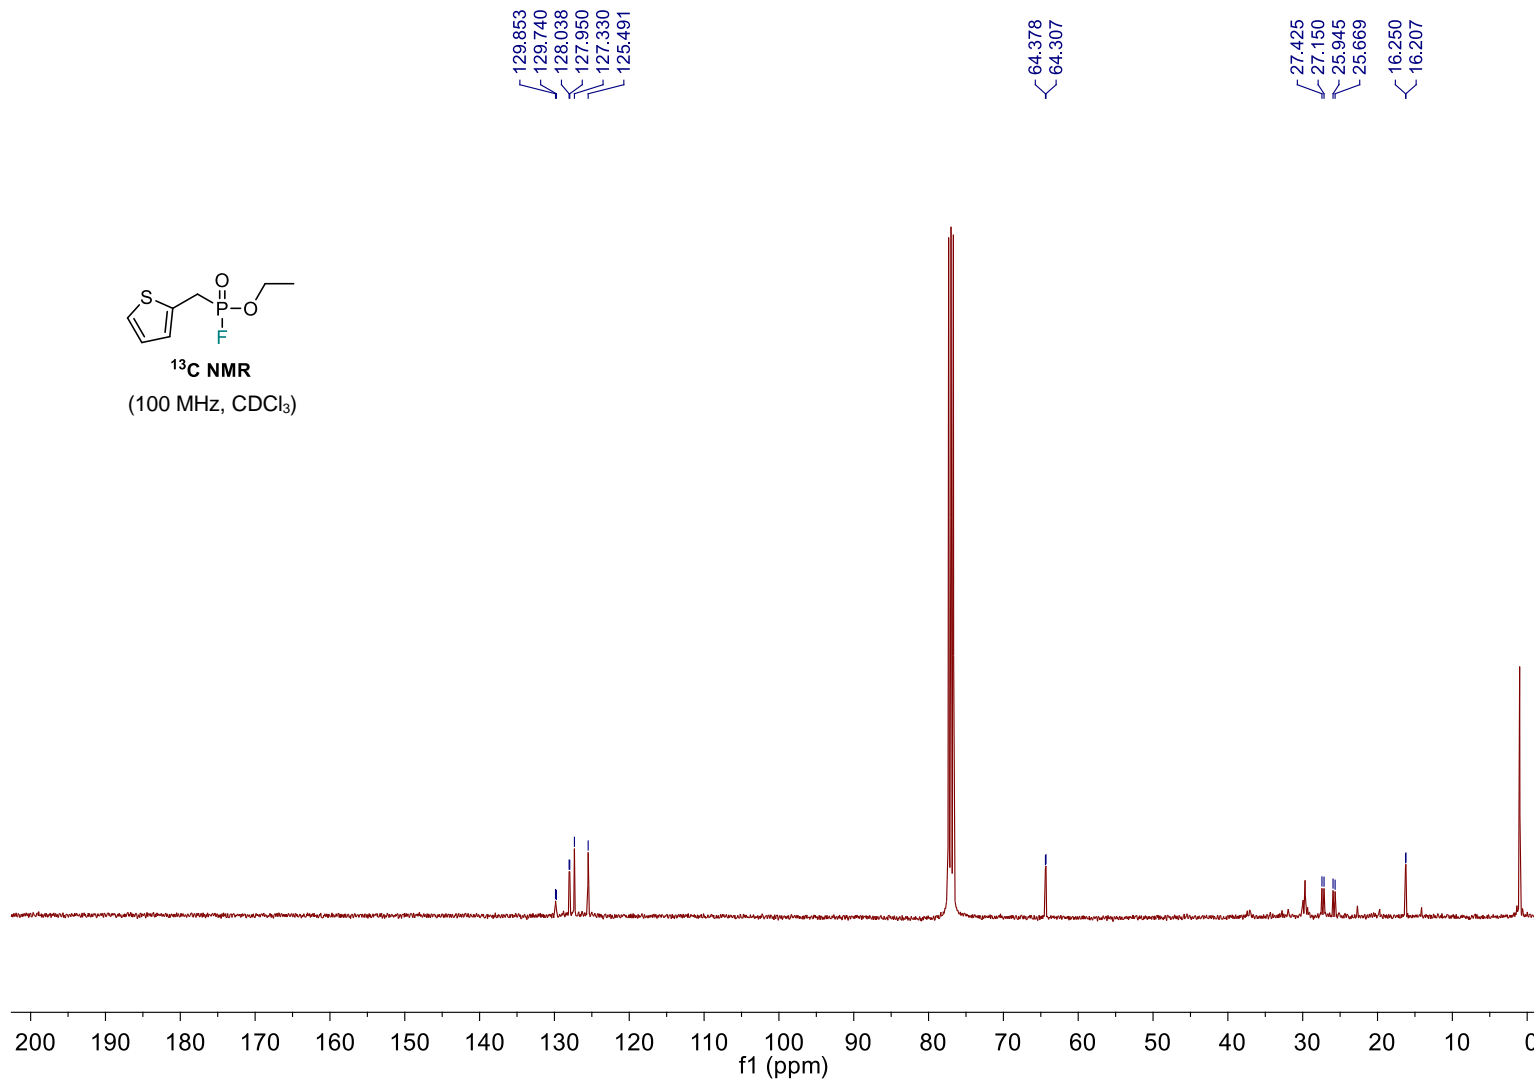

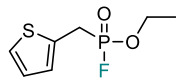

**<sup>31</sup>P NMR**  
(162 MHz, CDCl<sub>3</sub>)

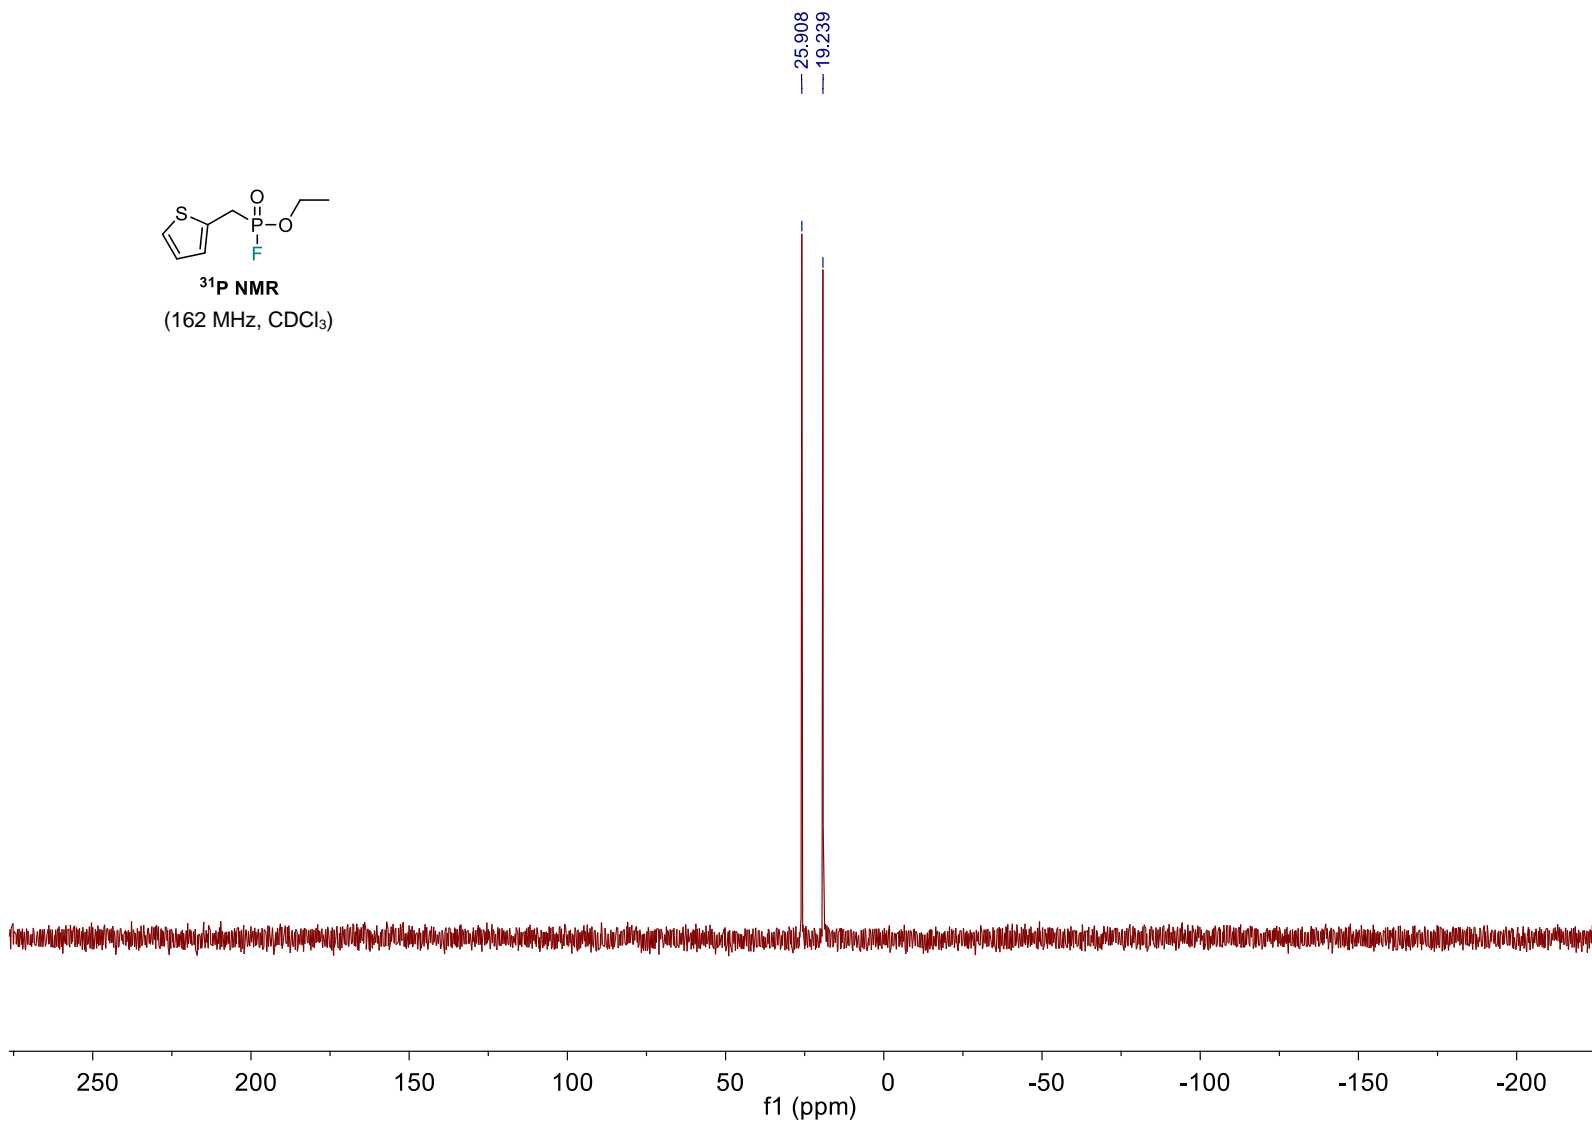

S327

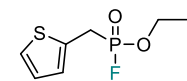

<sup>19</sup>F NMR  
(376 MHz, CDCl<sub>3</sub>)

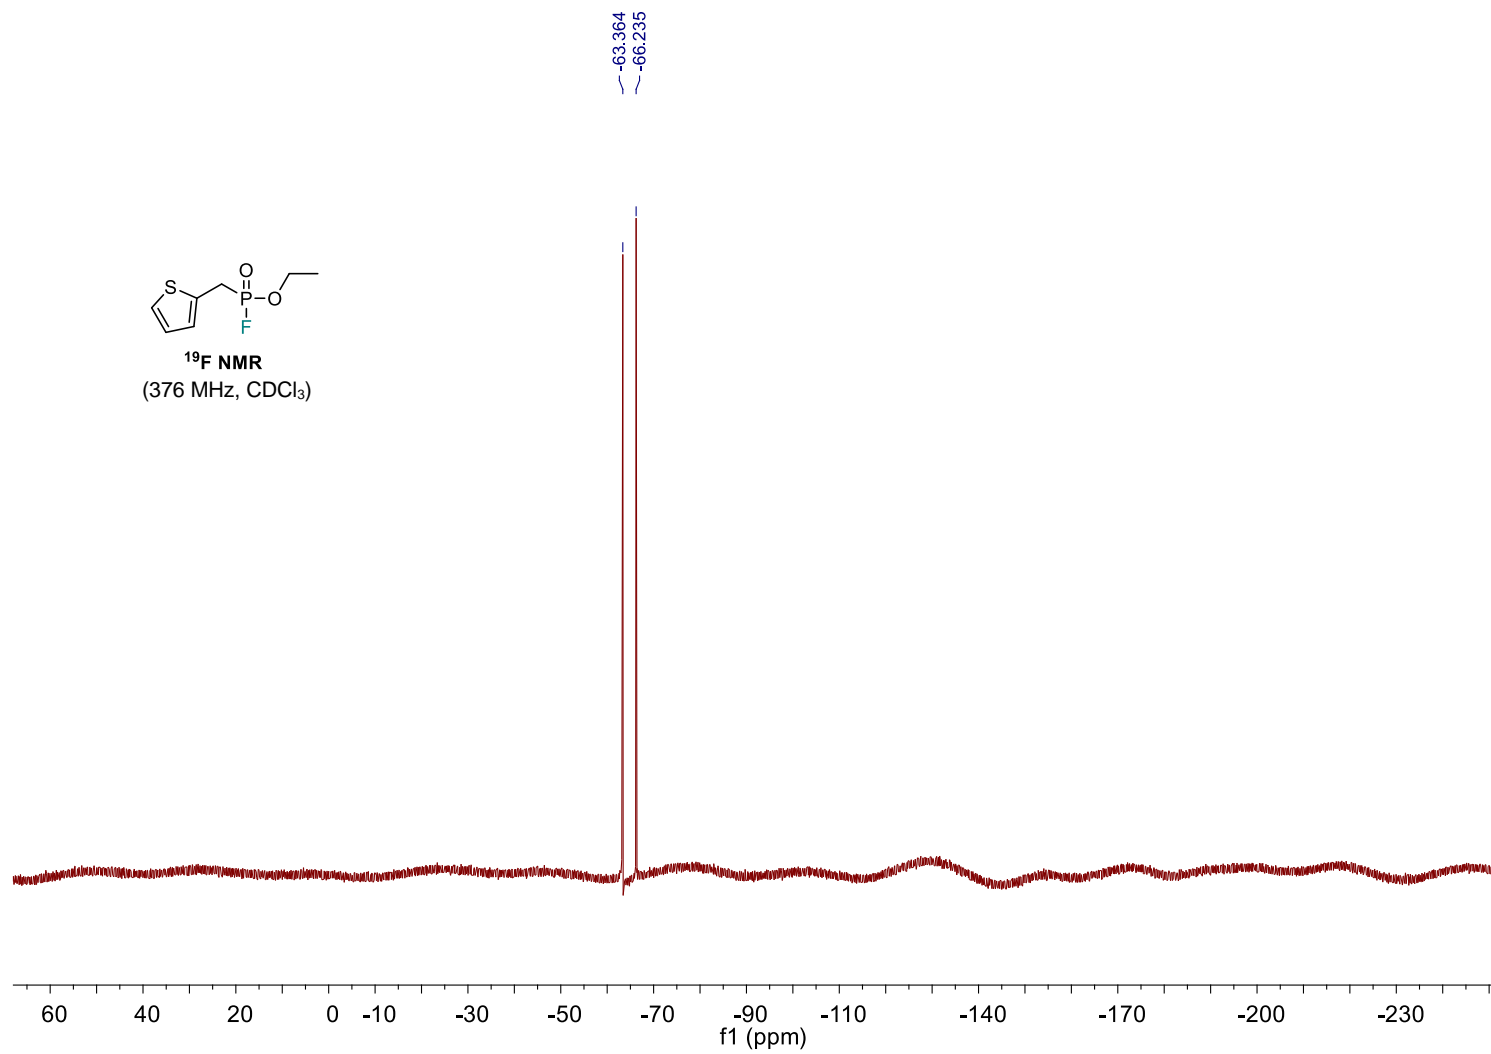



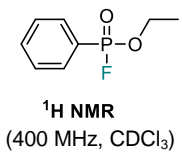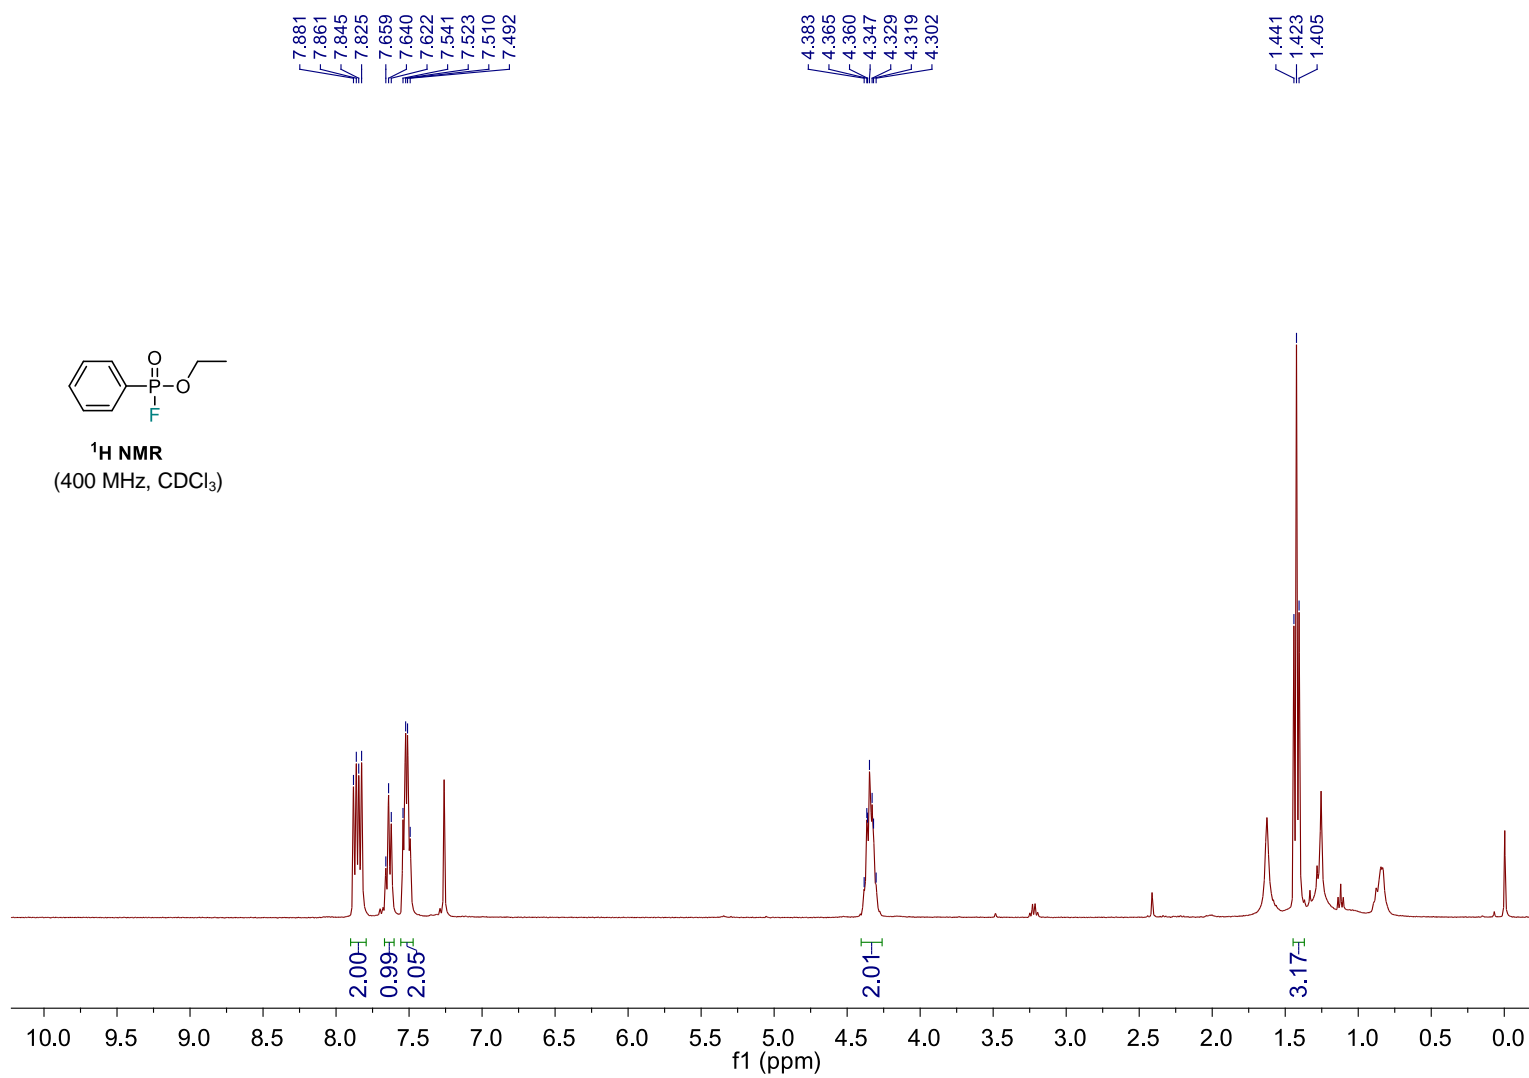

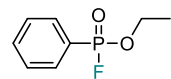

<sup>13</sup>C NMR  
(100 MHz, CDCl<sub>3</sub>)

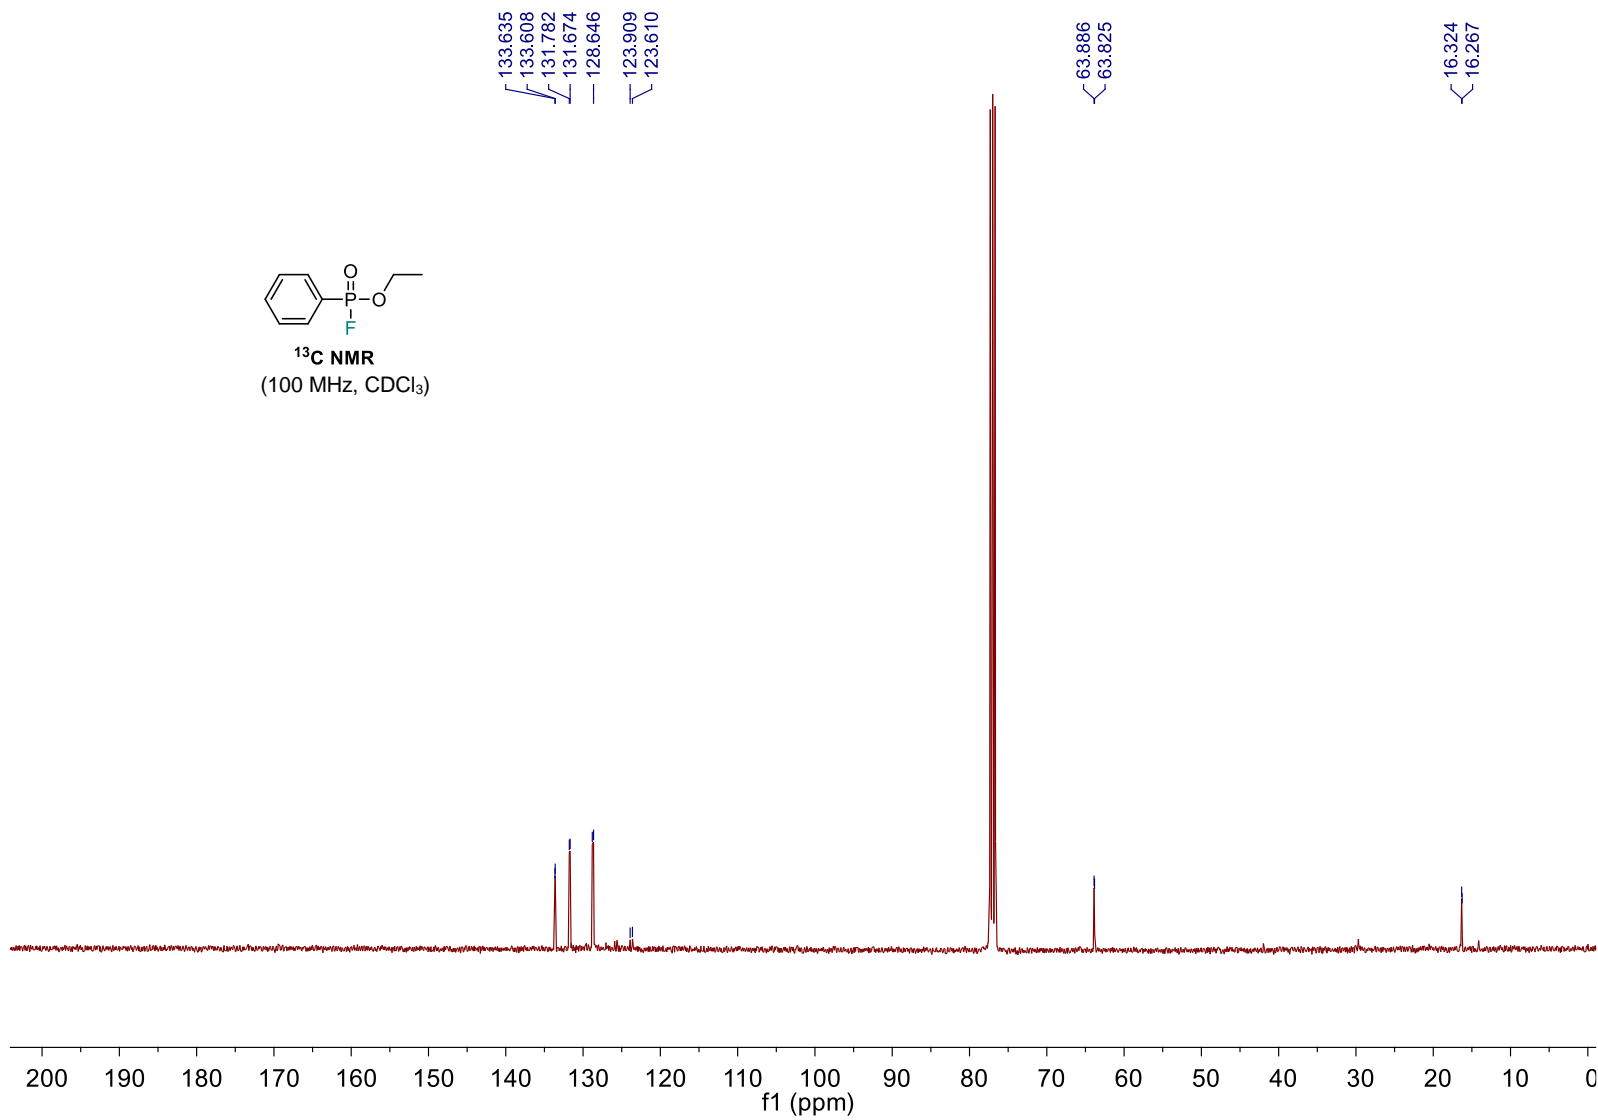

S330

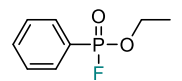

**<sup>31</sup>P NMR**  
(162 MHz, CDCl<sub>3</sub>)

— 20.285  
— 13.846

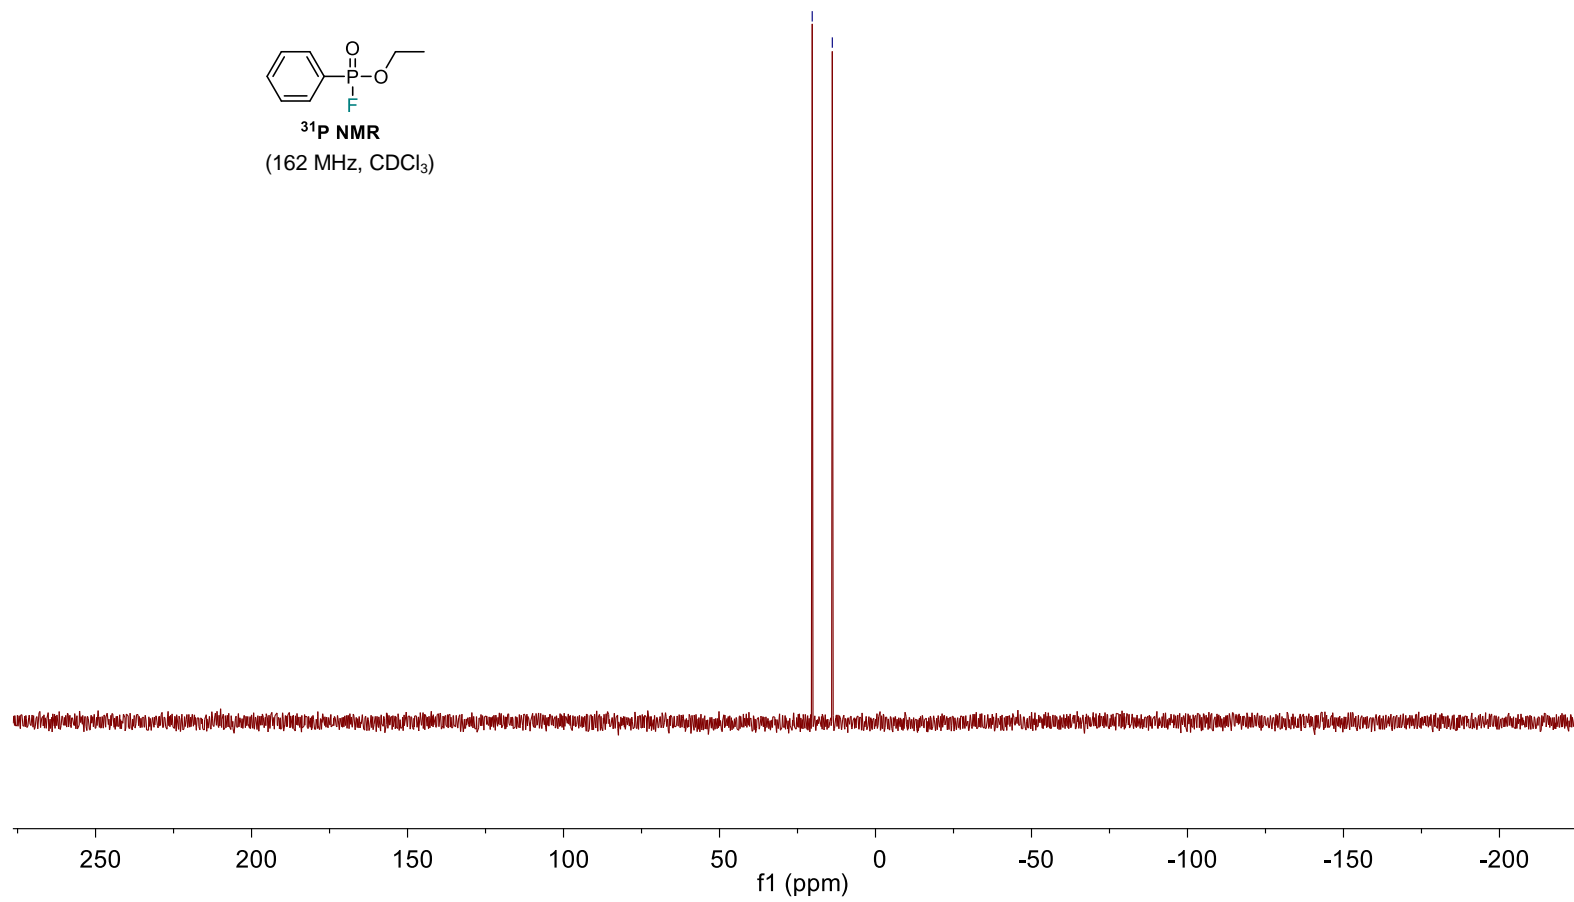

S331

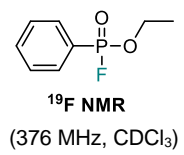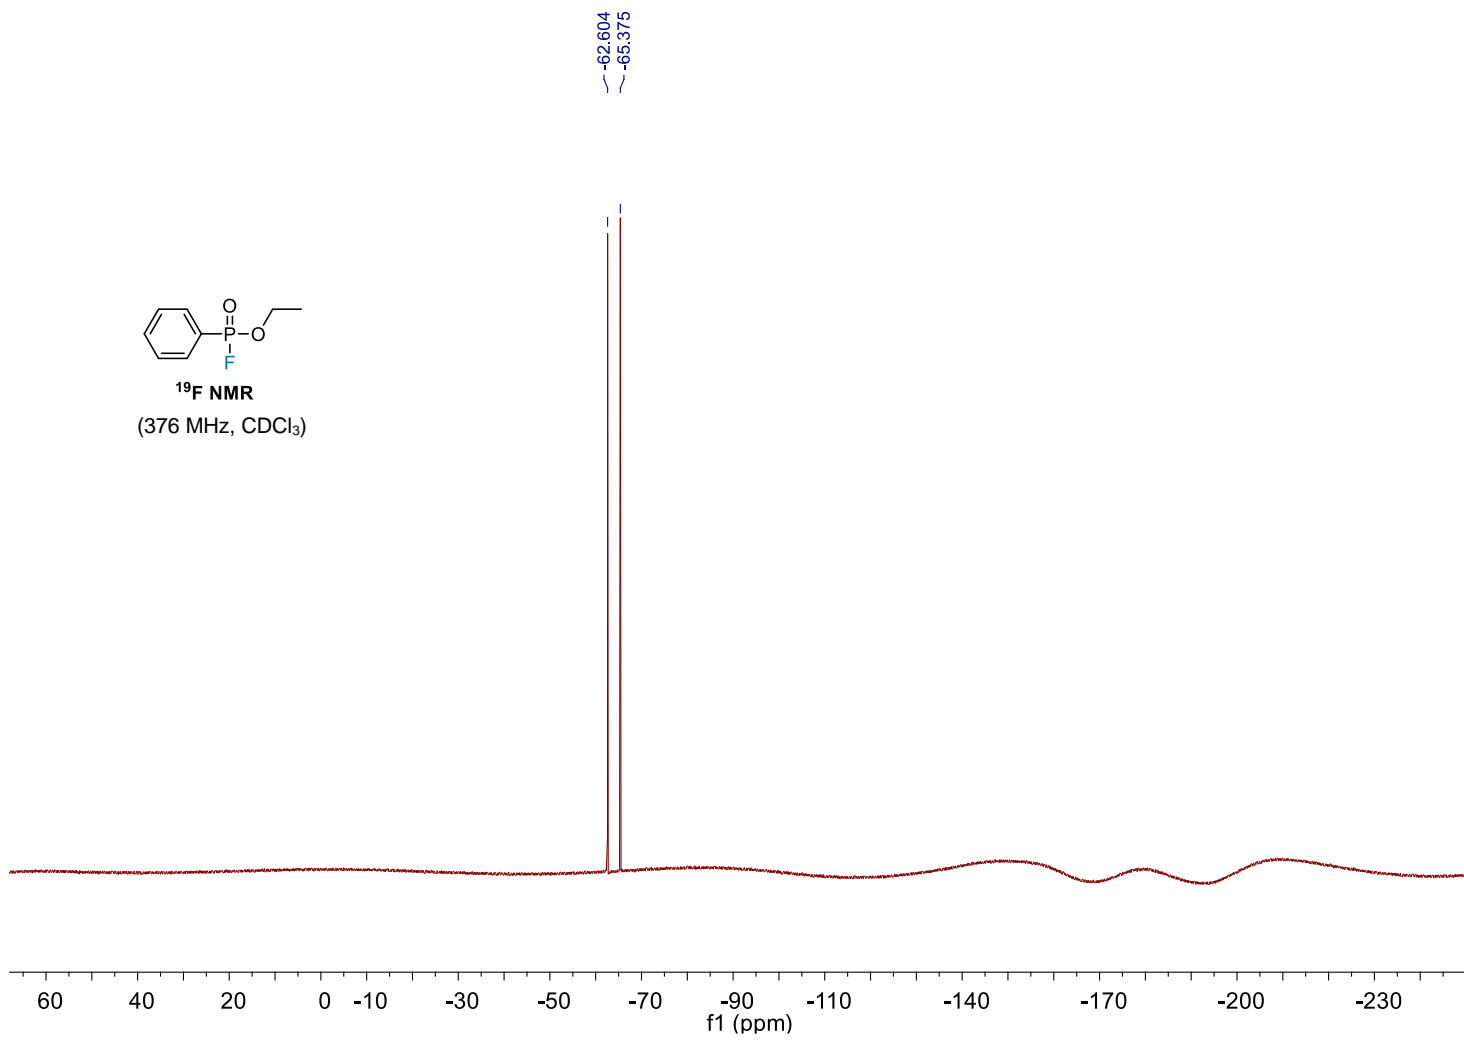

8.785  
8.771  
7.961  
7.948  
7.879  
7.865  
7.839  
7.824  
7.692  
7.680  
7.667  
7.608  
7.595  
7.583

4.392  
4.388  
4.380  
4.376  
4.368  
4.365  
4.363  
4.362  
4.353  
4.350  
4.339  
4.022  
4.018  
3.984  
3.980

1.395  
1.383  
1.372

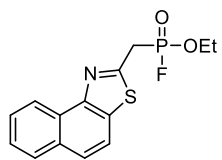

<sup>1</sup>H NMR  
(600 MHz, CDCl<sub>3</sub>)

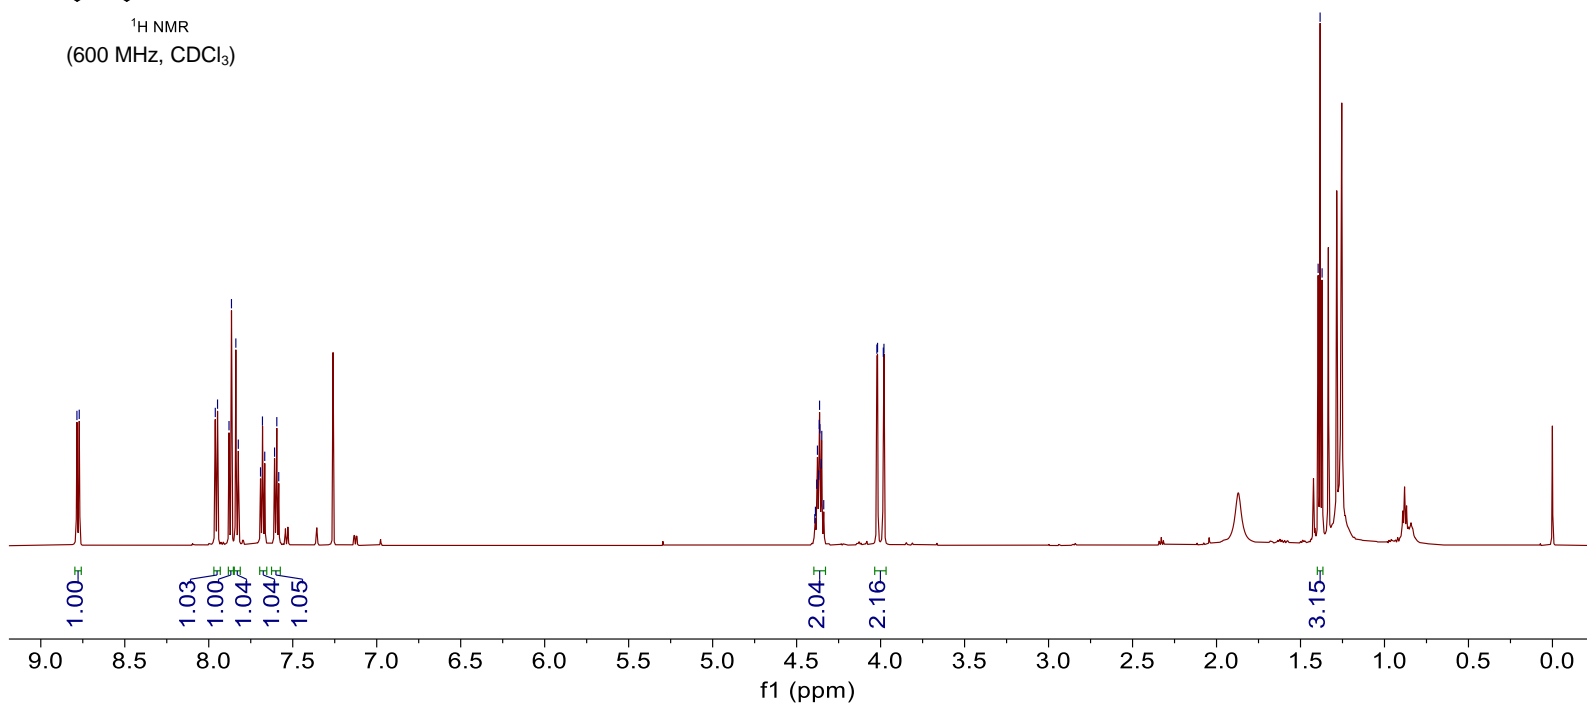

S333

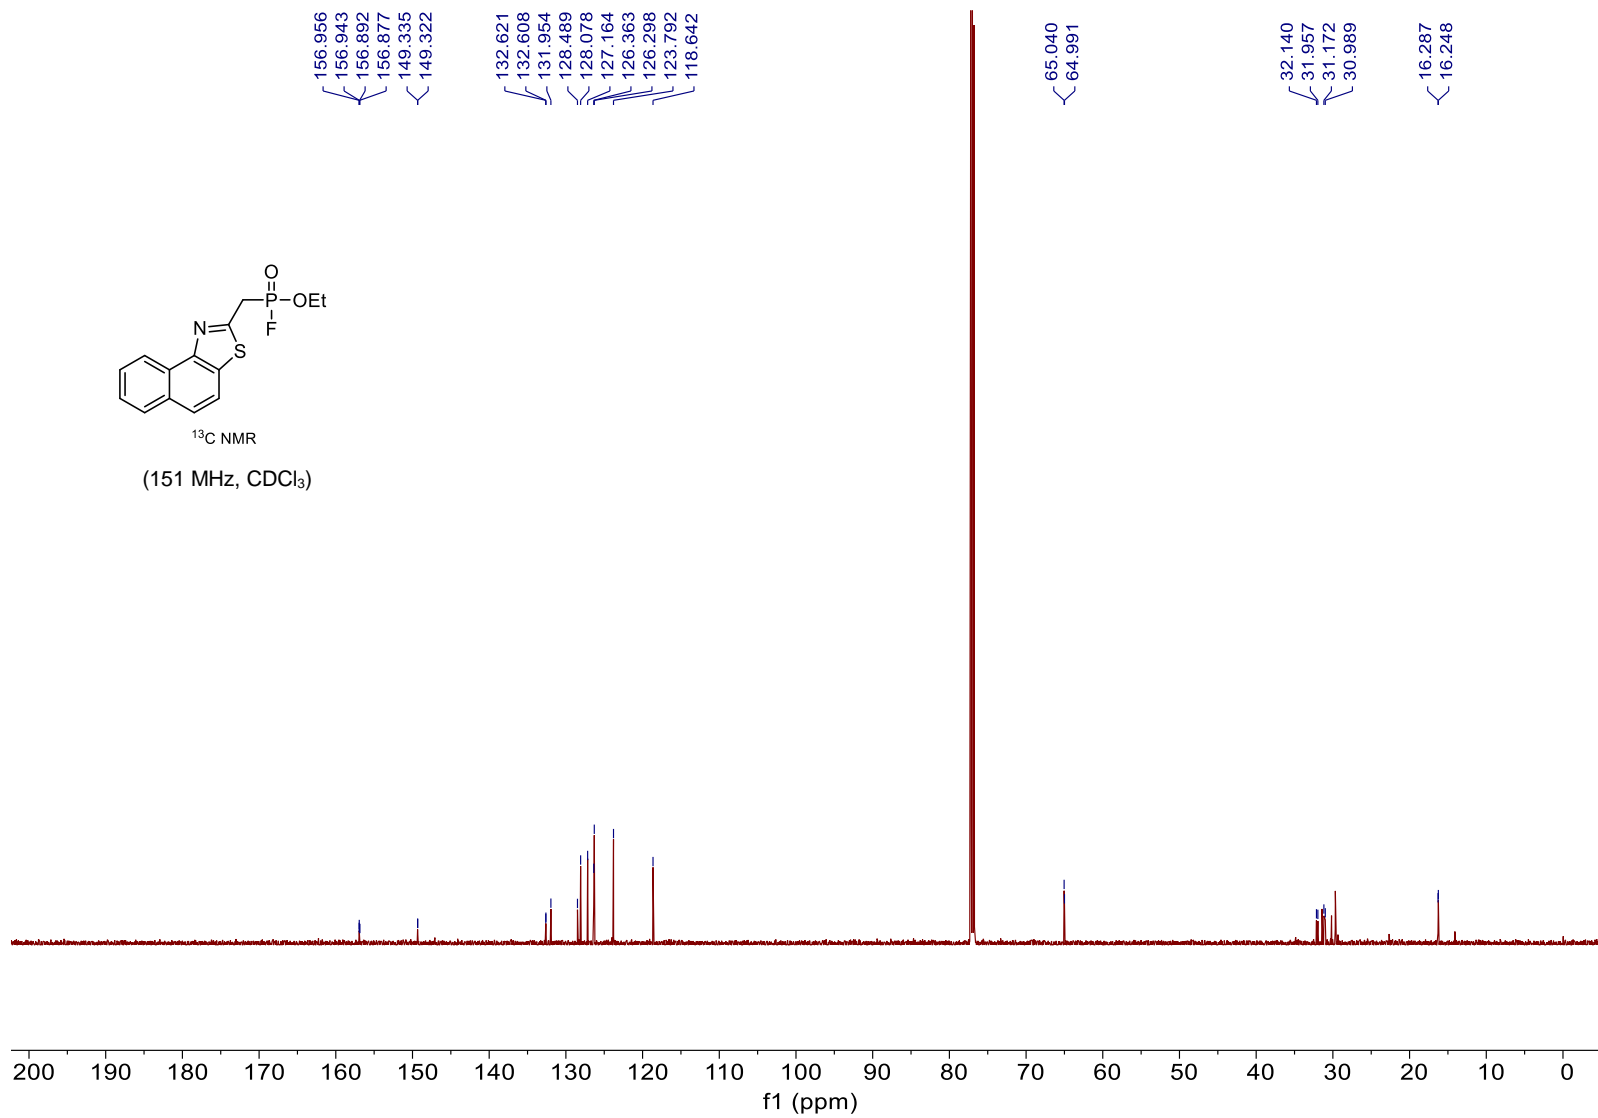

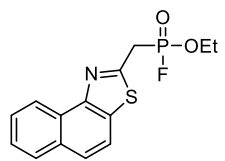

<sup>31</sup>P NMR  
(243 MHz, CDCl<sub>3</sub>)

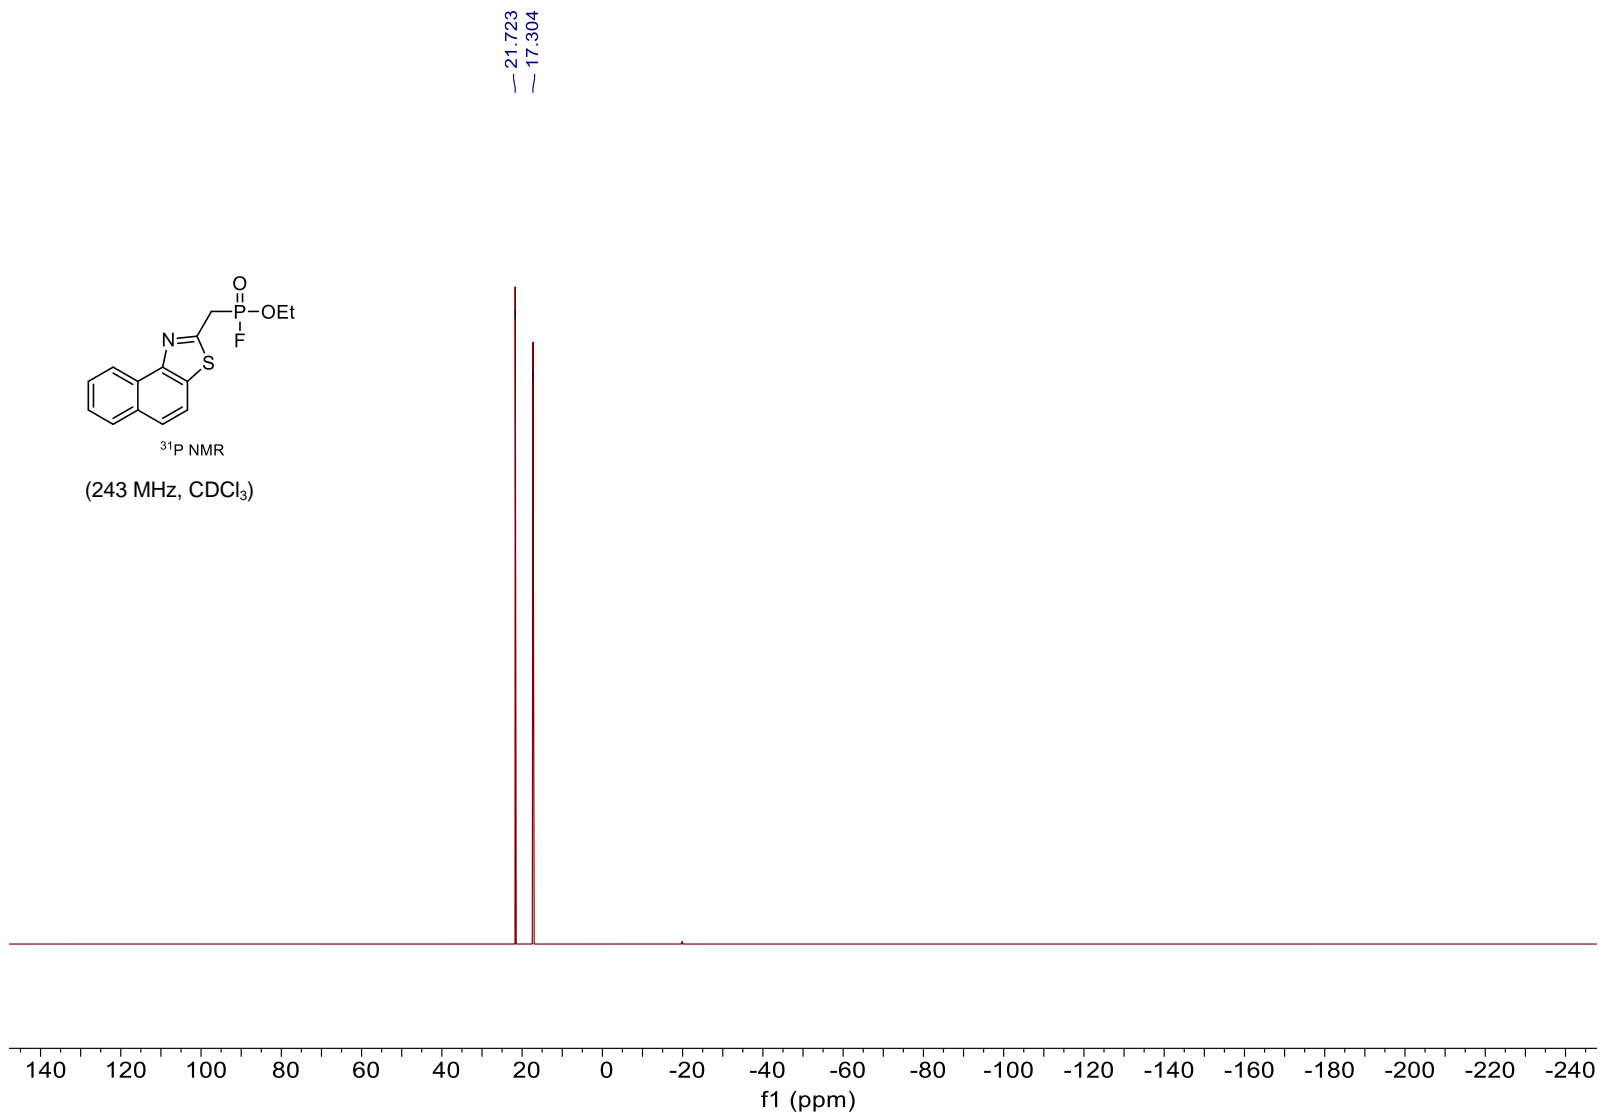

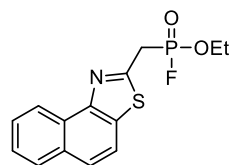

<sup>19</sup>F NMR  
(565 MHz, CDCl<sub>3</sub>)

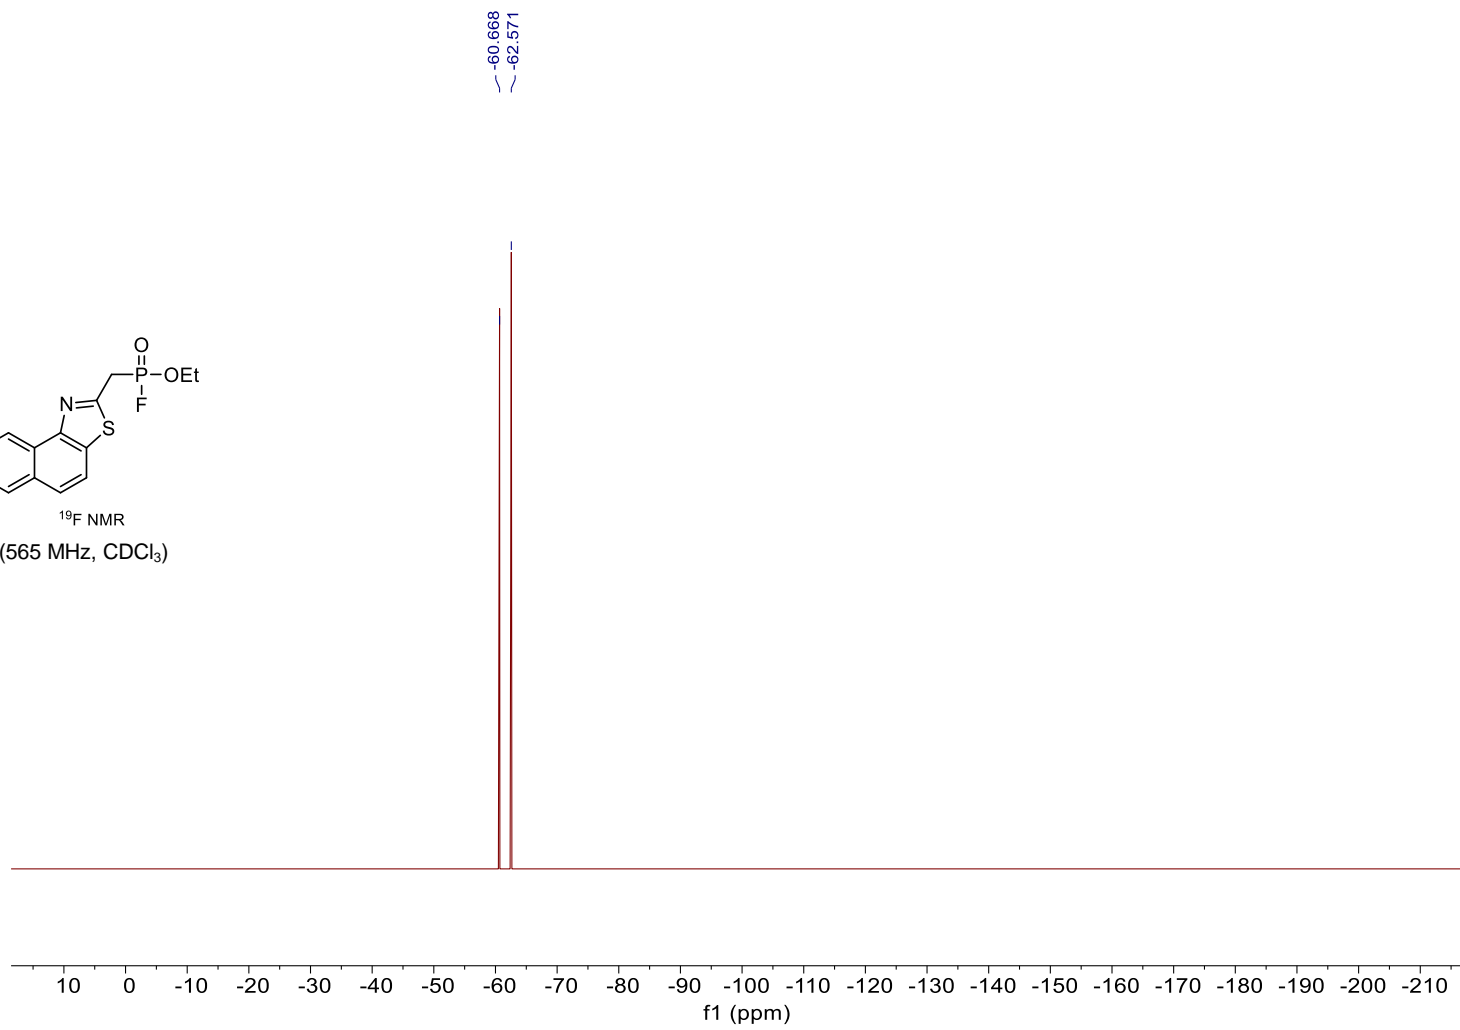



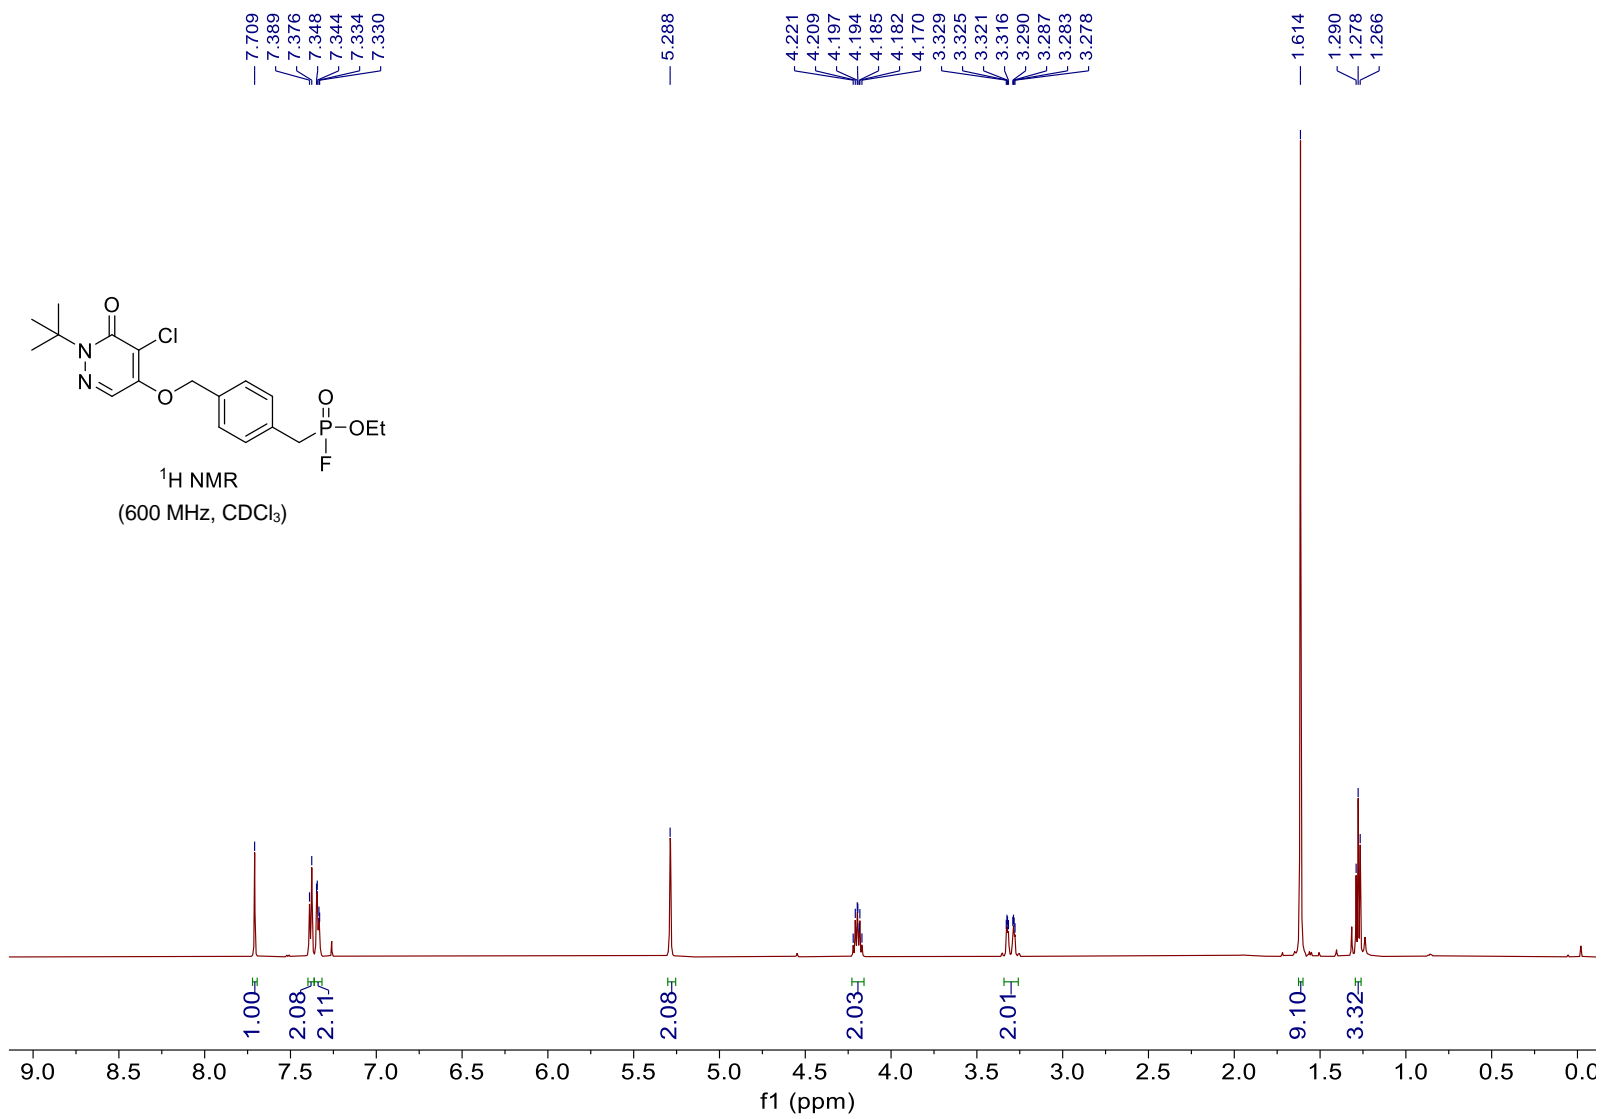

S337

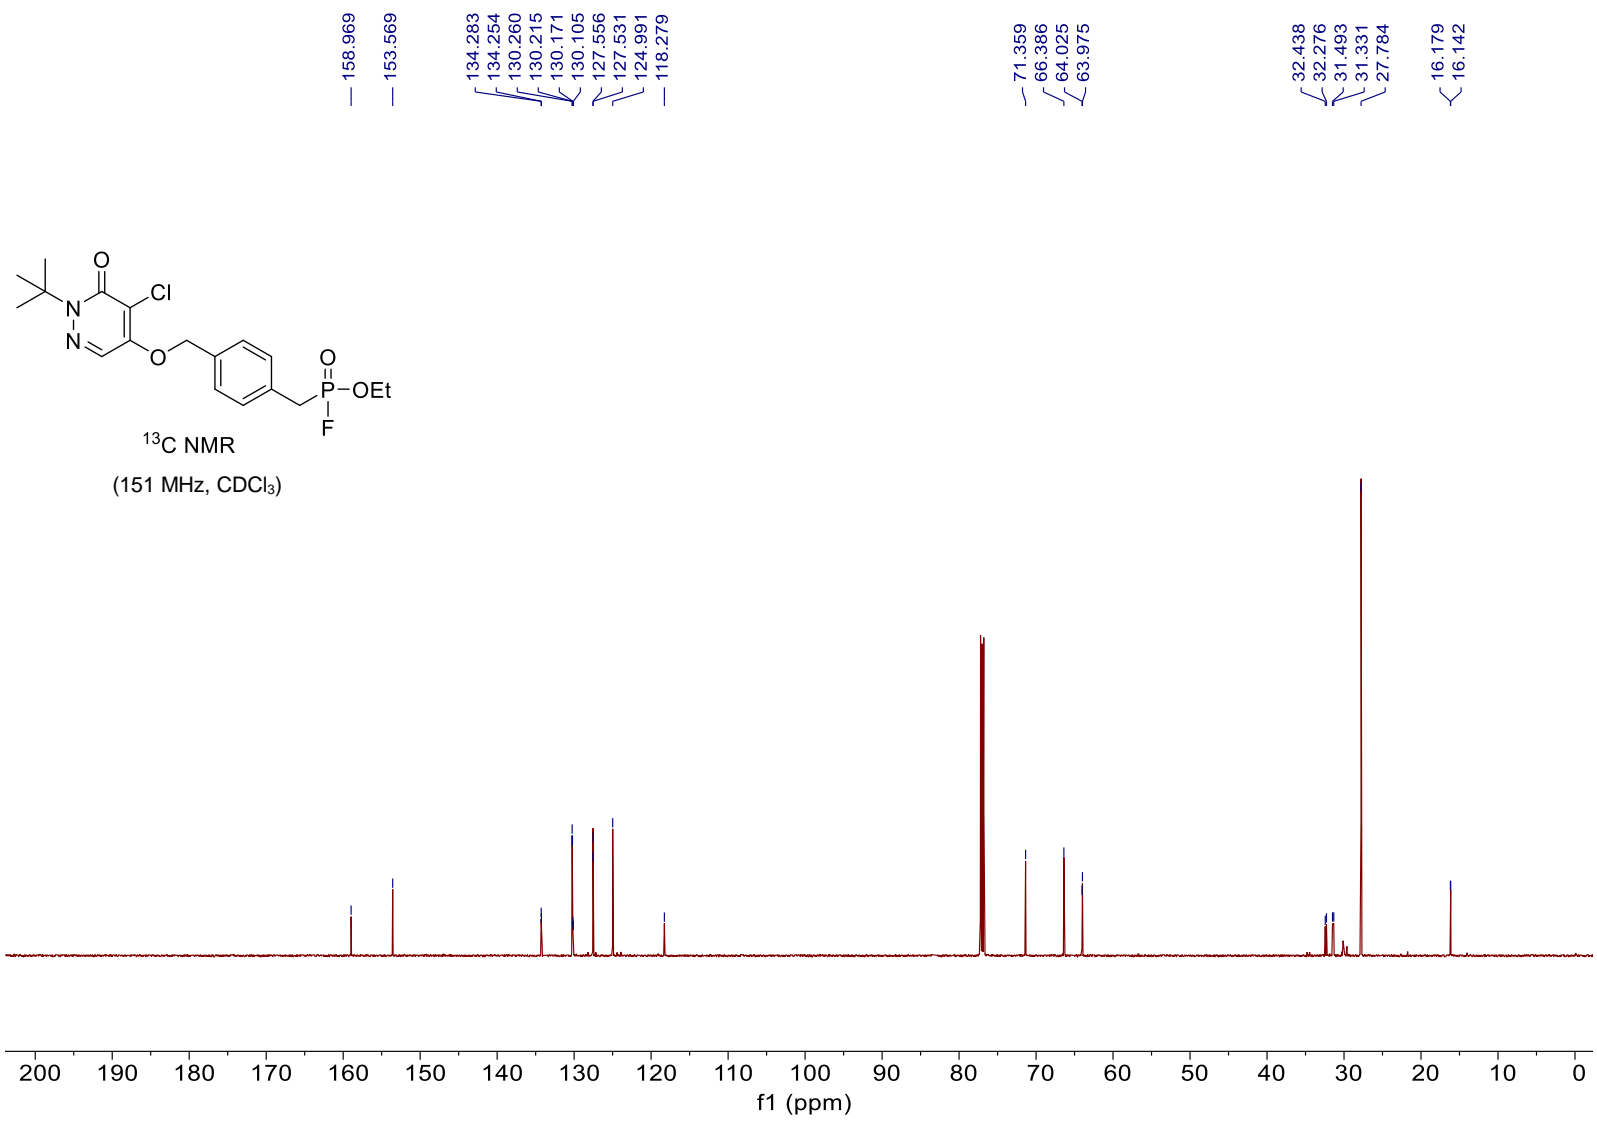

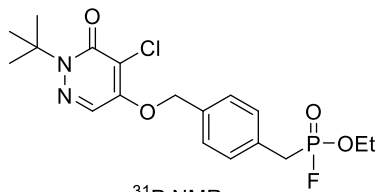

<sup>31</sup>P NMR  
(243 MHz, CDCl<sub>3</sub>)

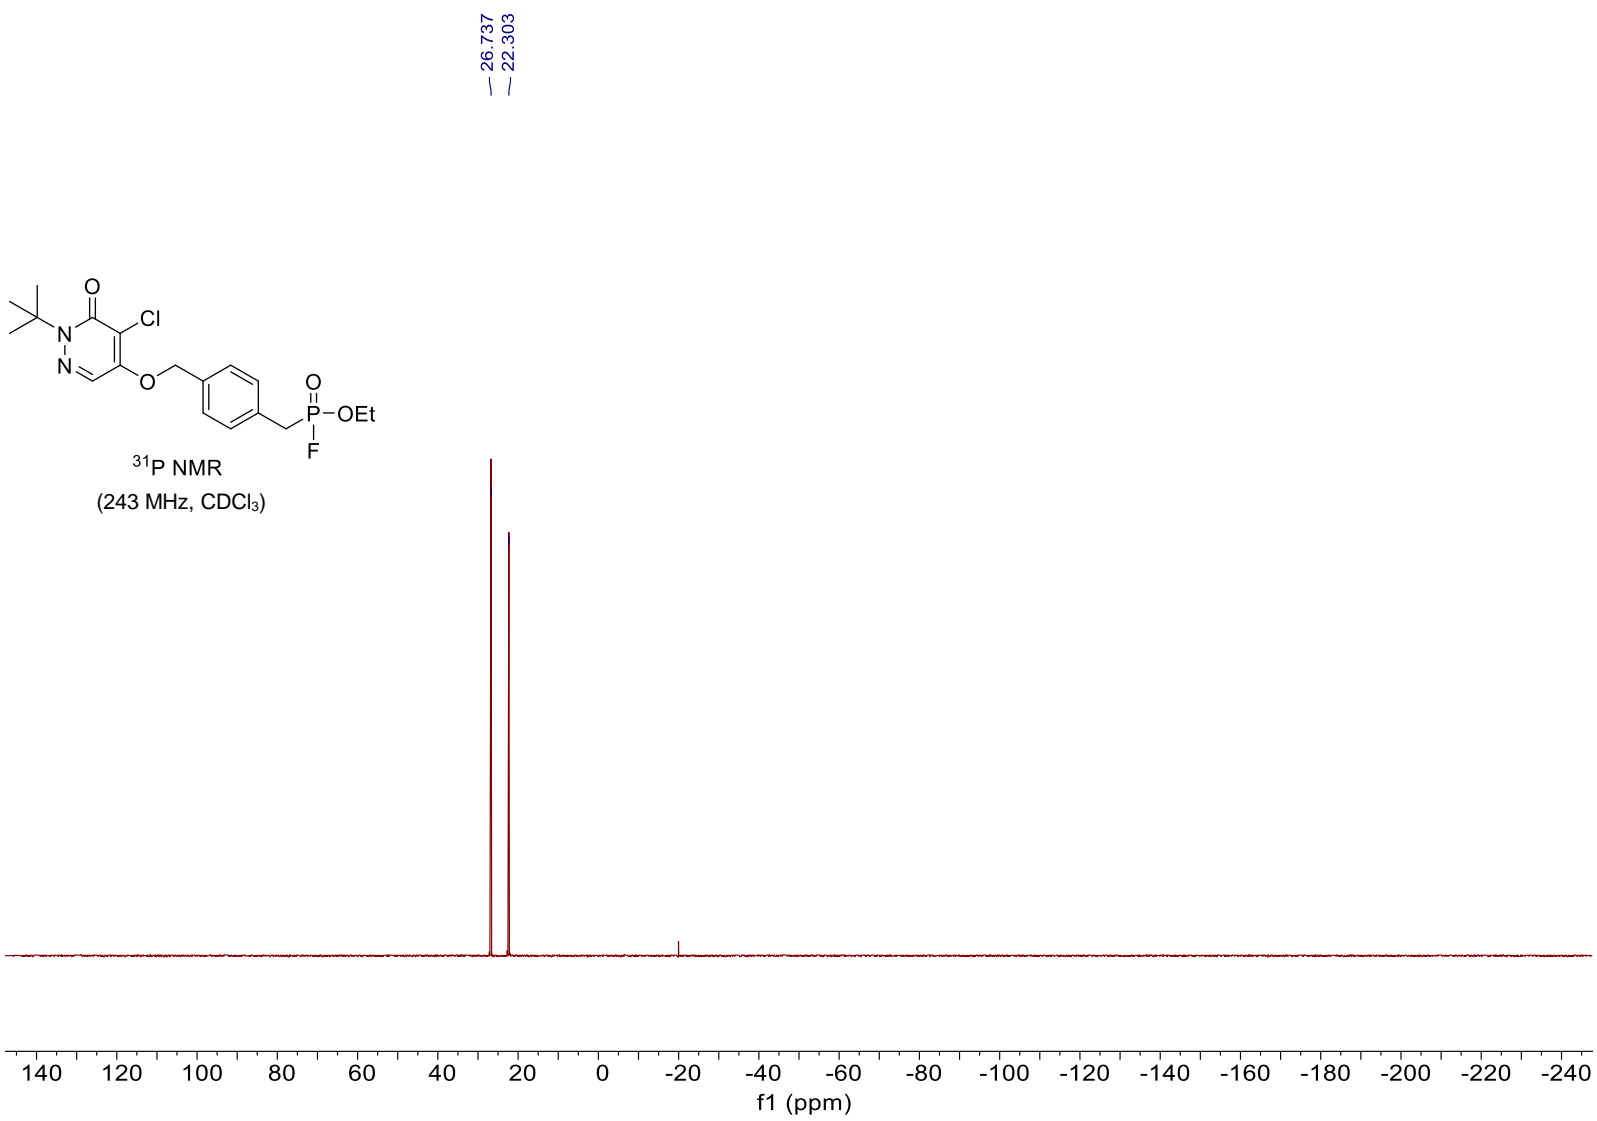

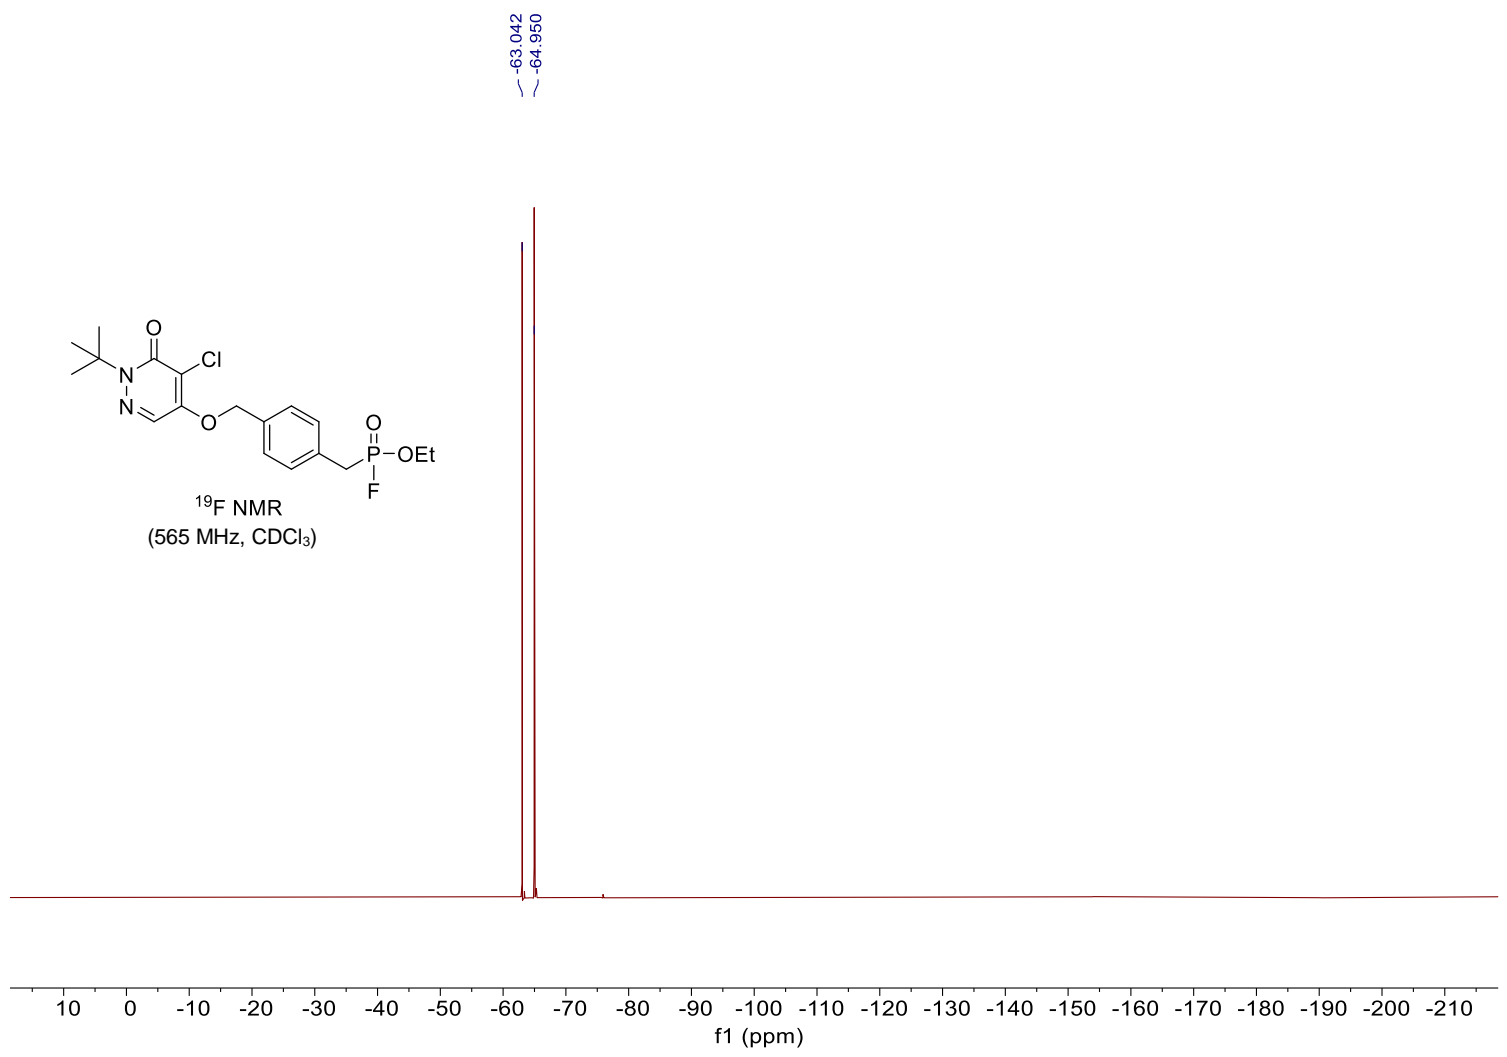

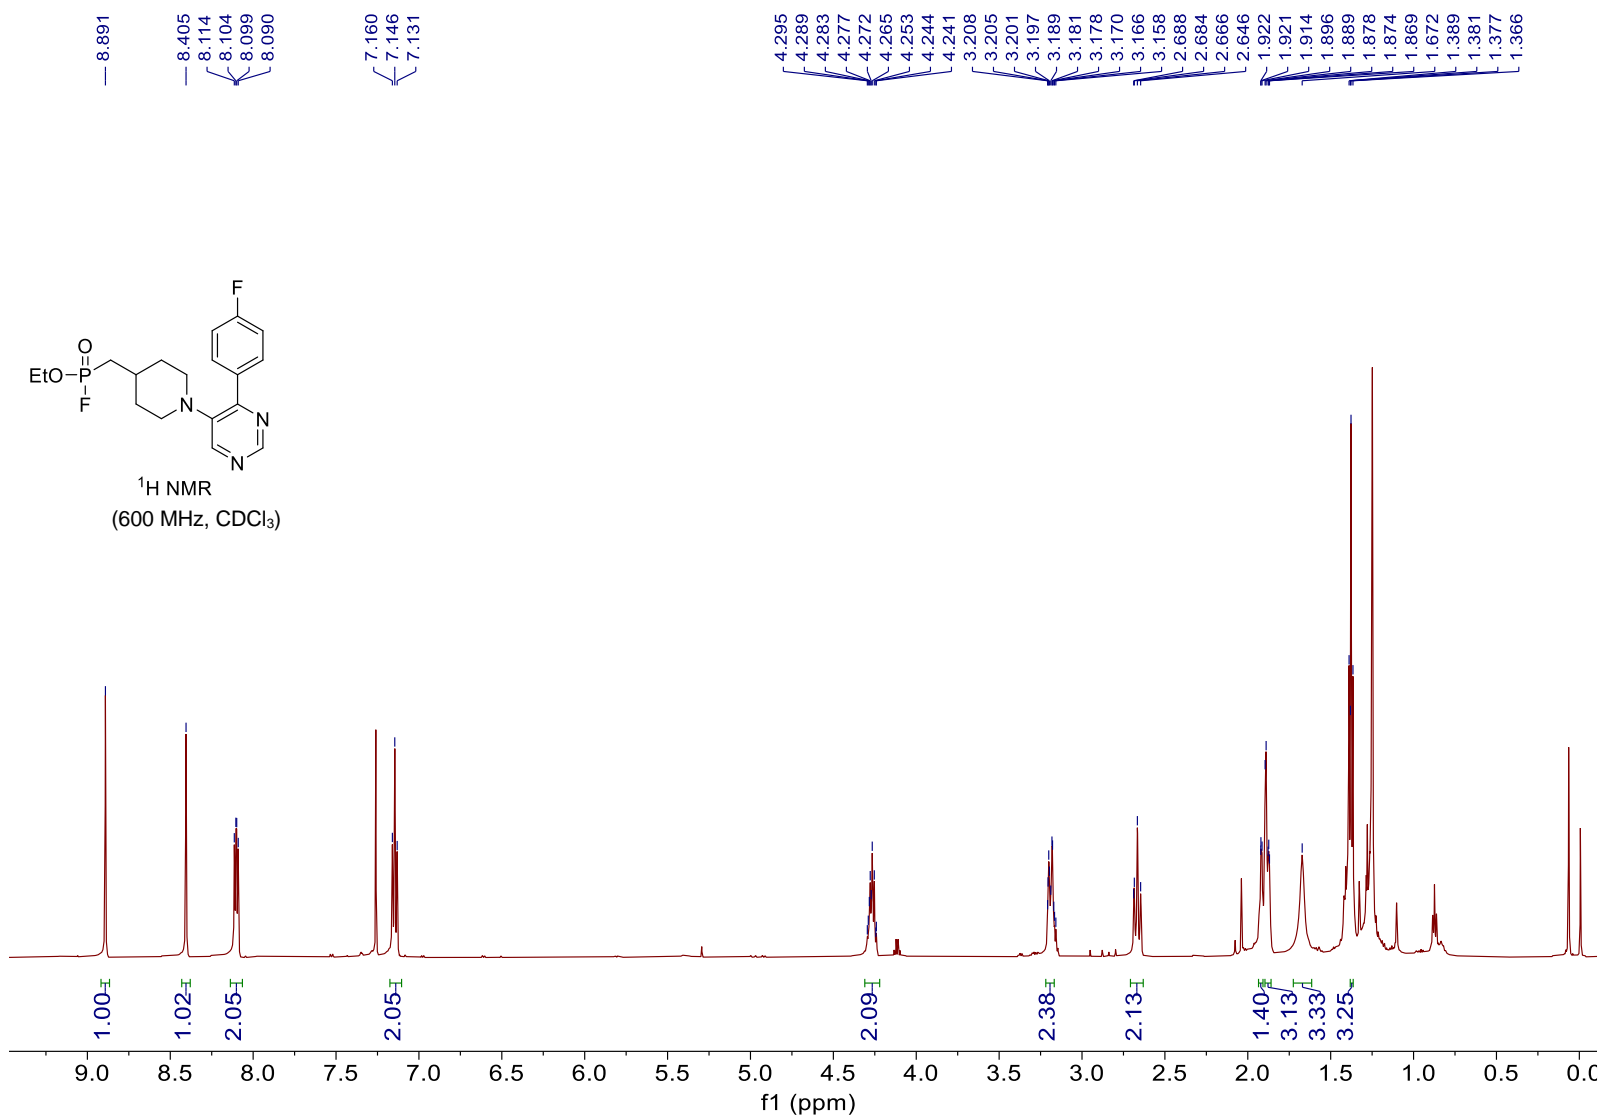

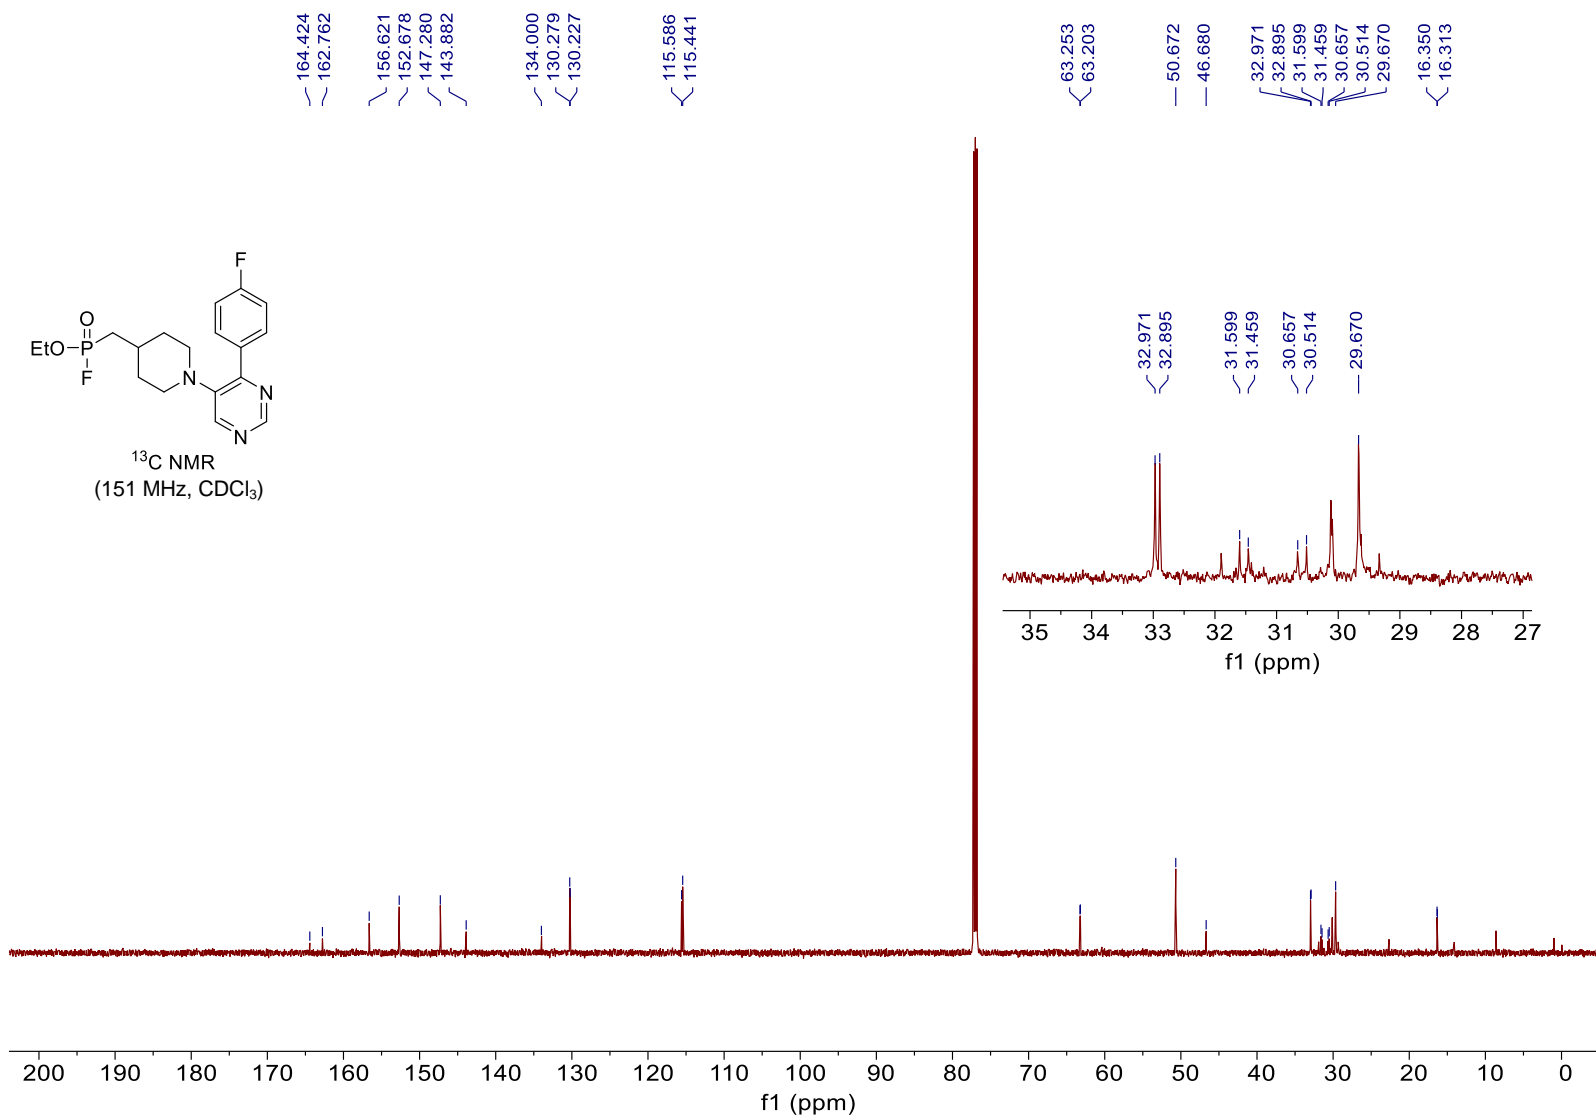

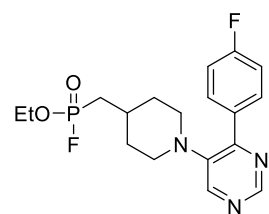

<sup>31</sup>P NMR  
(243 MHz, CDCl<sub>3</sub>)

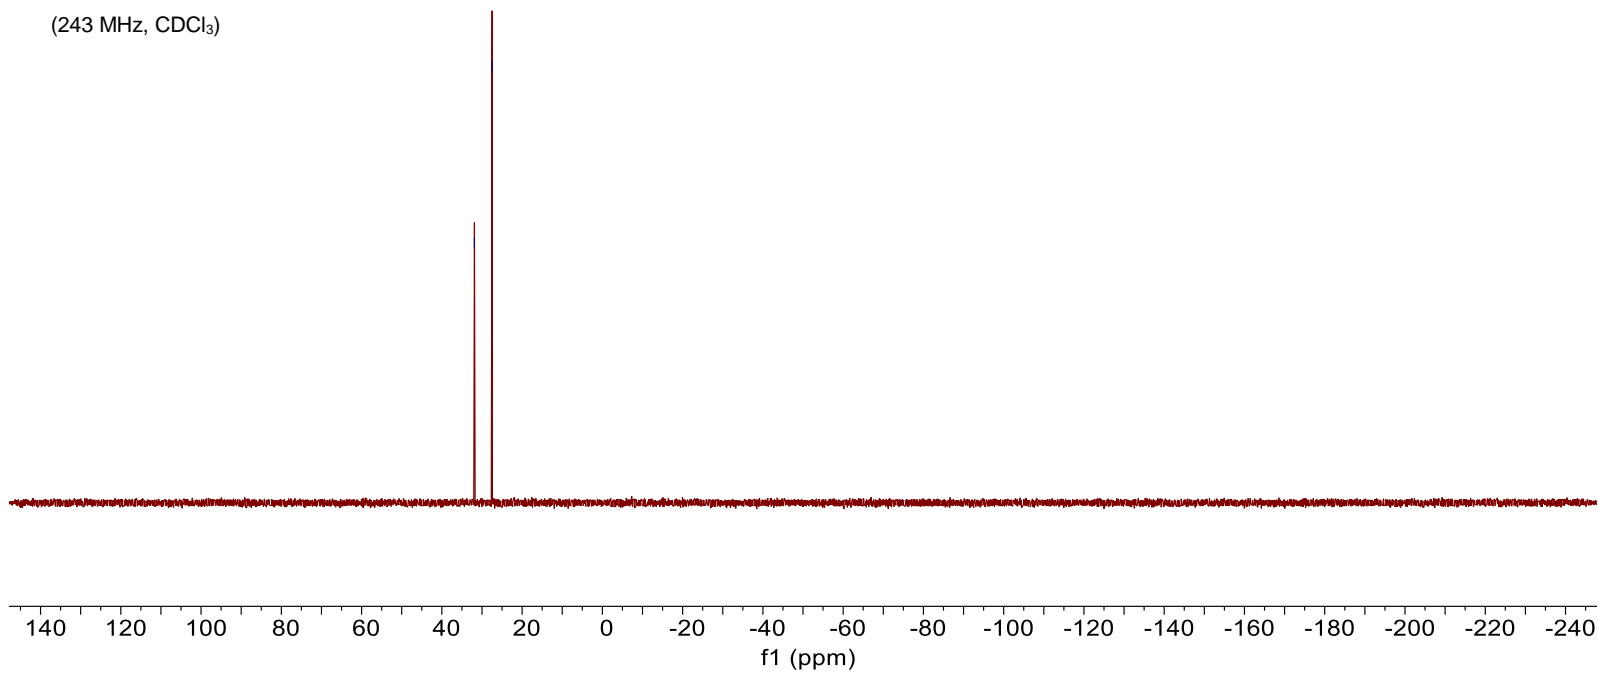

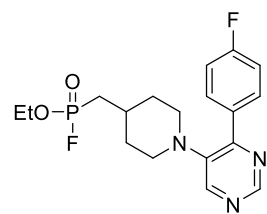

<sup>19</sup>F NMR  
(565 MHz, CDCl<sub>3</sub>)

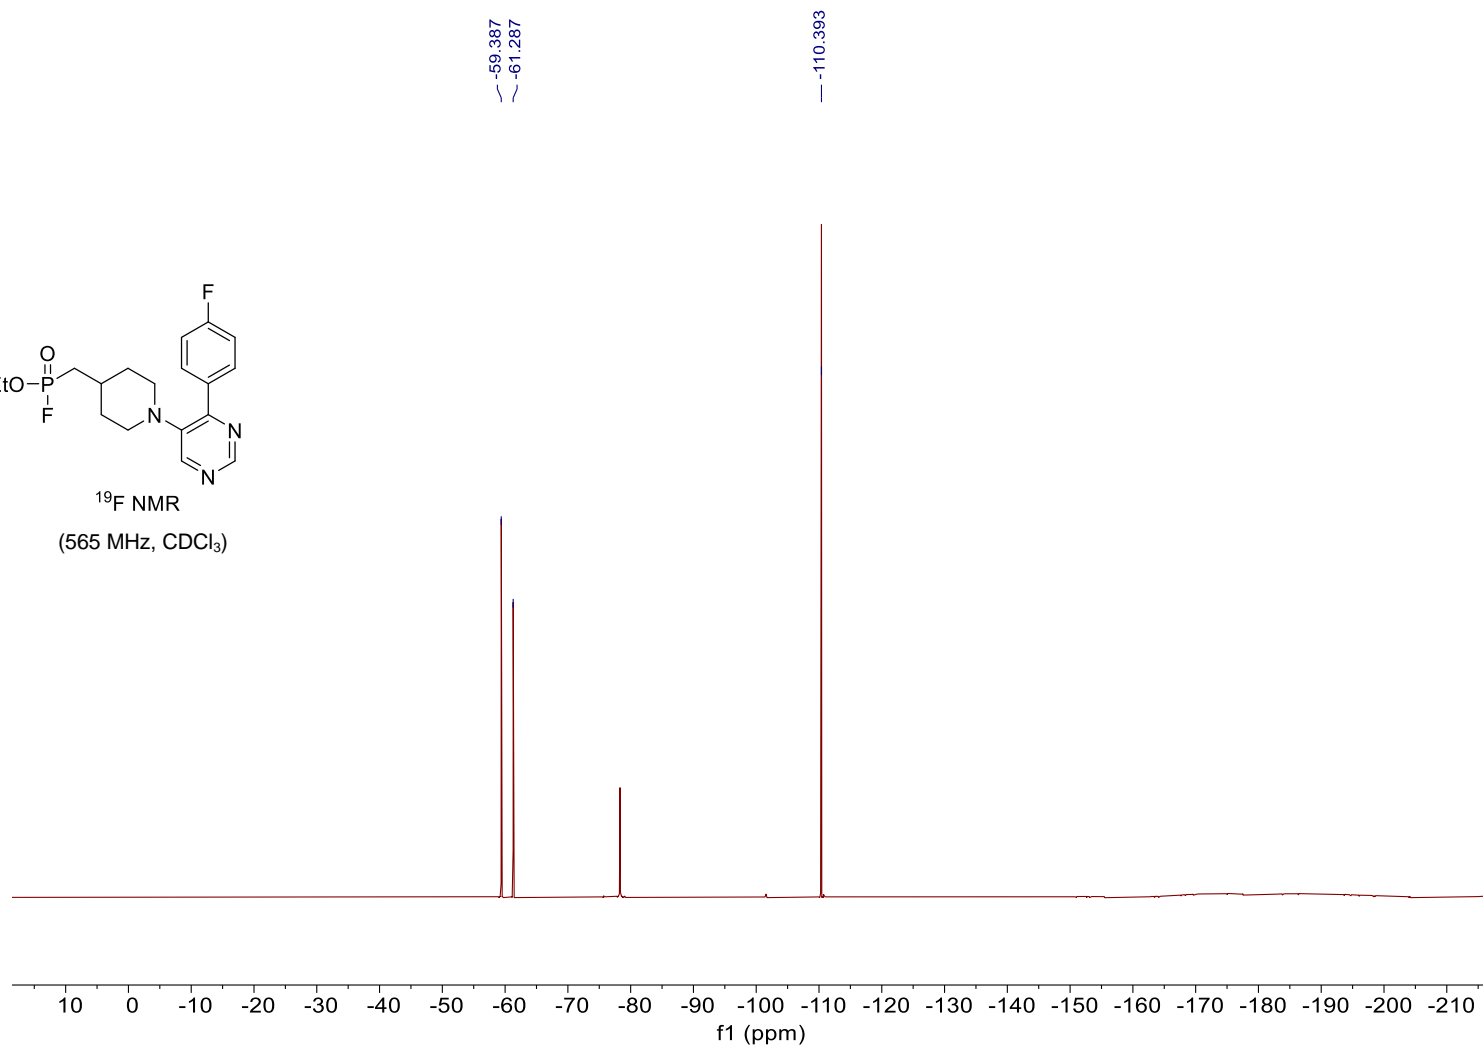



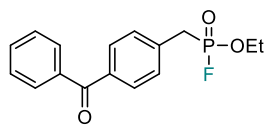

<sup>1</sup>H NMR  
(400 MHz, CDCl<sub>3</sub>)

7.795  
7.775  
7.606  
7.588  
7.571  
7.497  
7.479  
7.460  
7.431  
7.414

4.275  
4.257  
4.237  
4.217  
4.199

3.415  
3.356

1.335  
1.318  
1.300

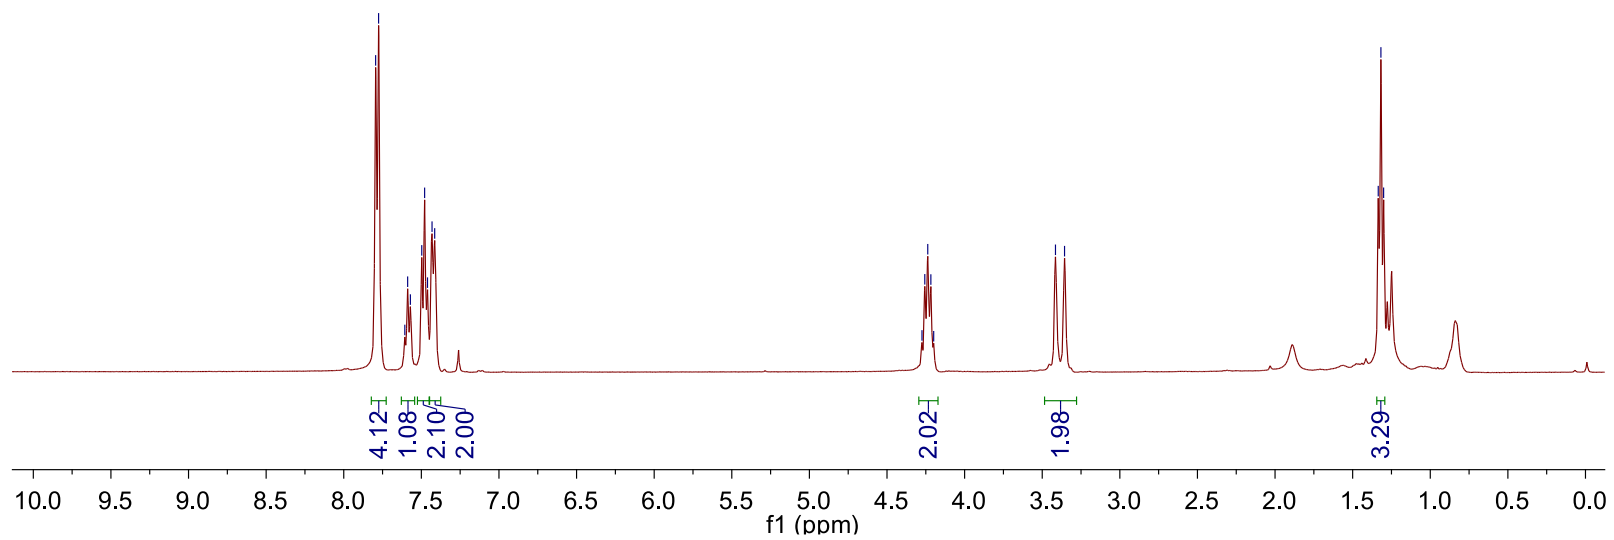

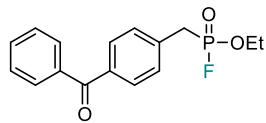

<sup>13</sup>C NMR  
(100 MHz, CDCl<sub>3</sub>)

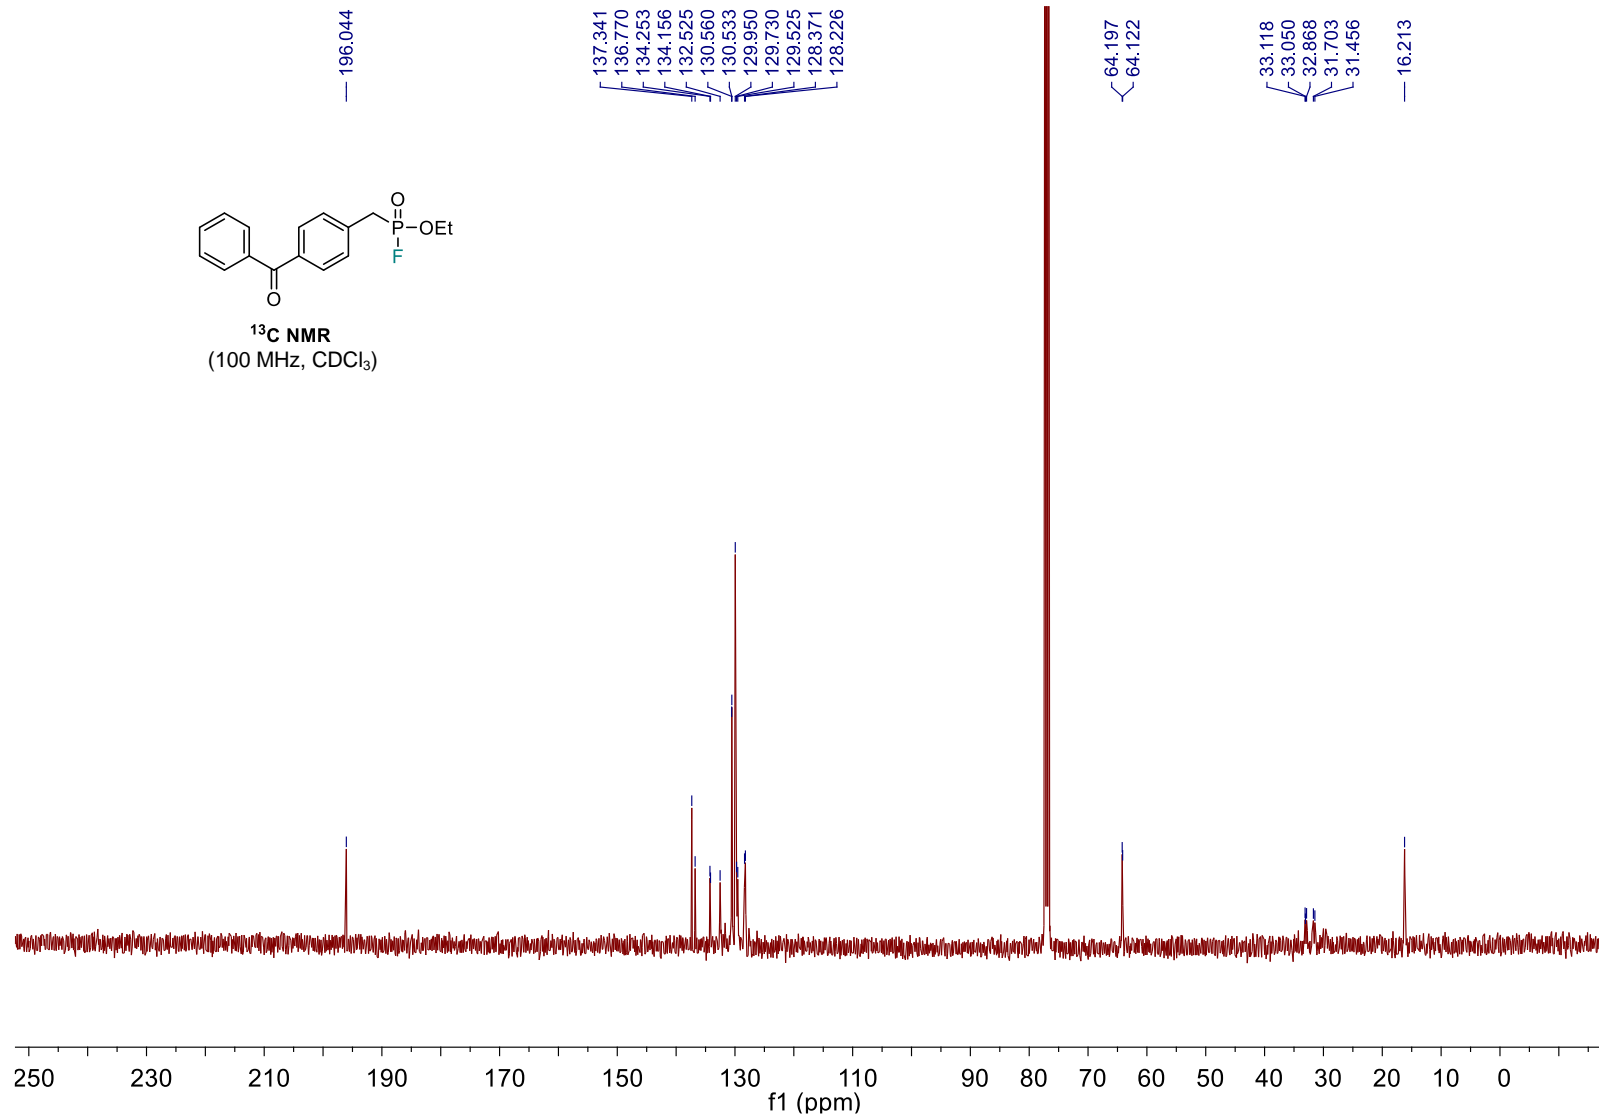

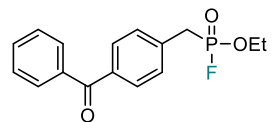

<sup>31</sup>P NMR  
(162 MHz, CDCl<sub>3</sub>)

— 27.125  
— 20.466

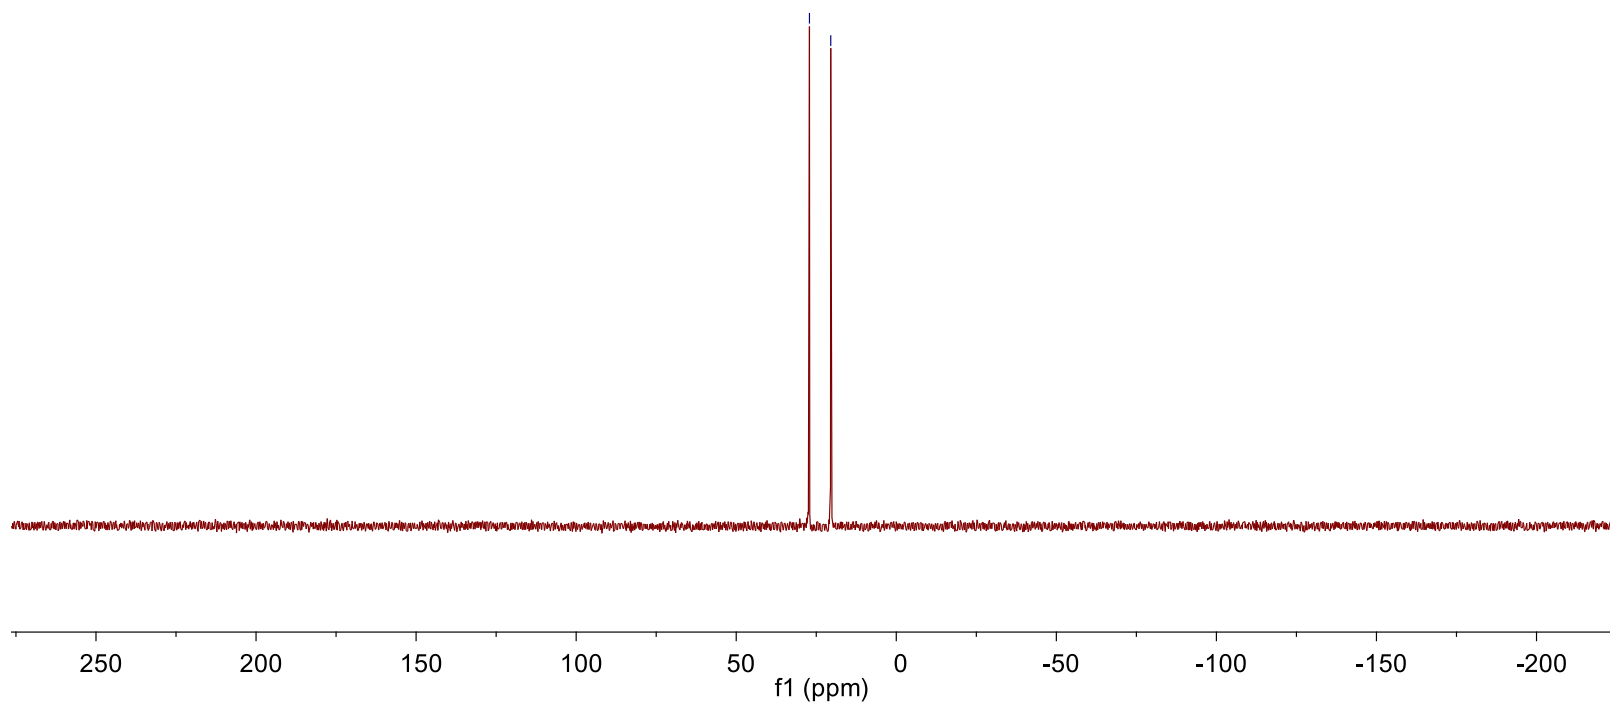

S347

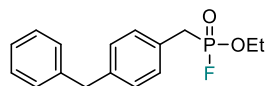

<sup>19</sup>F NMR  
(376 MHz, CDCl<sub>3</sub>)

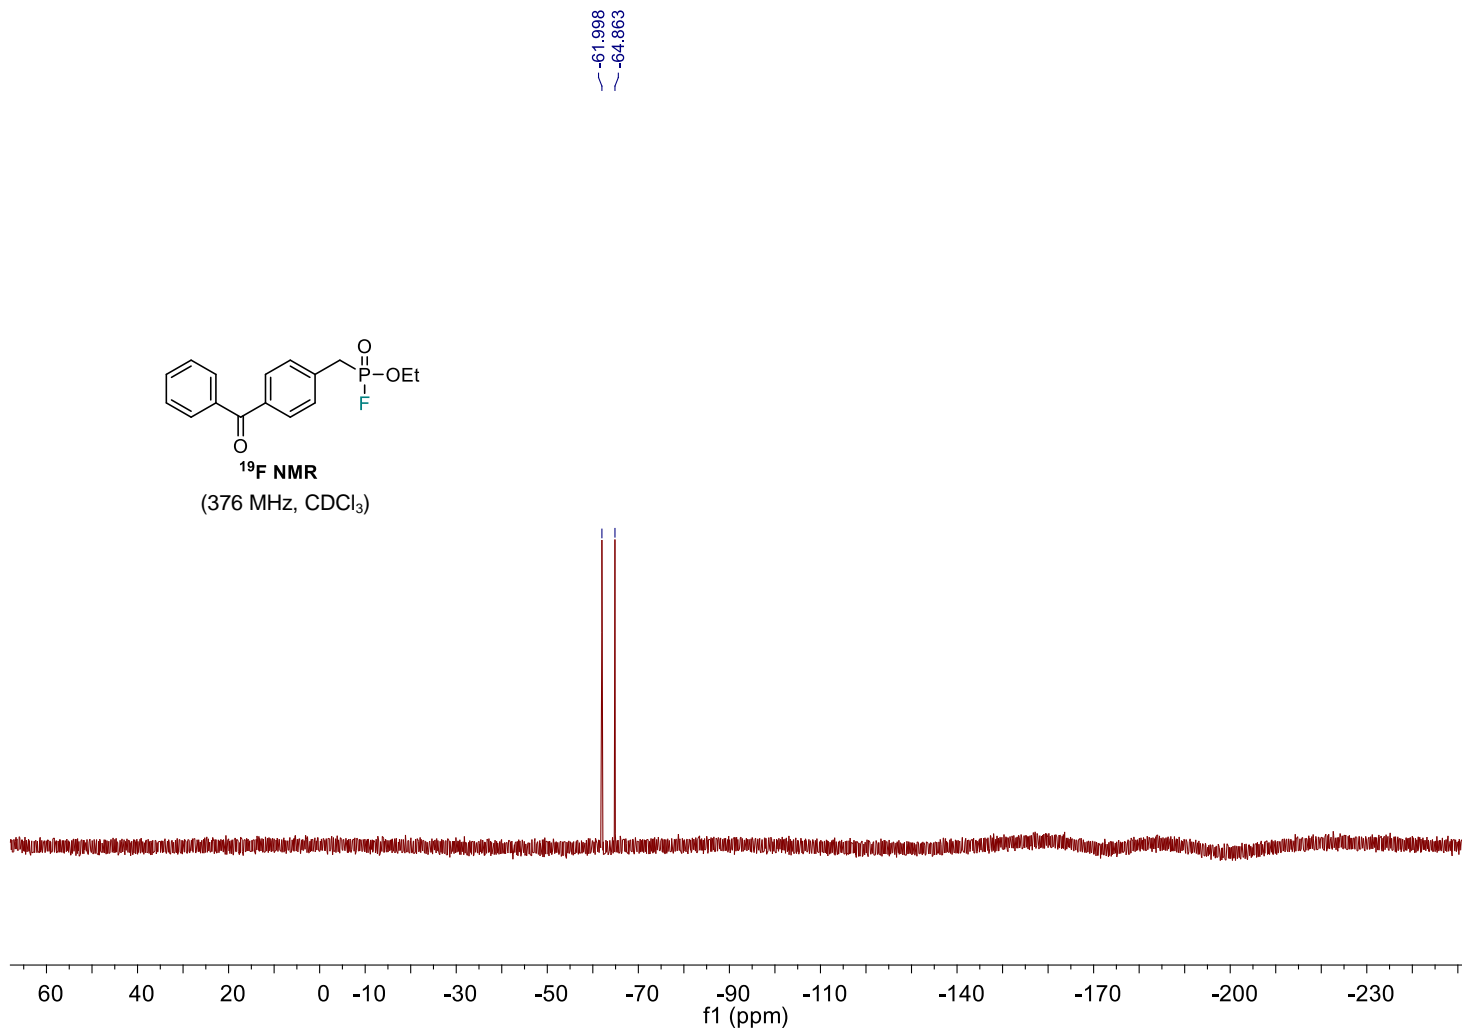

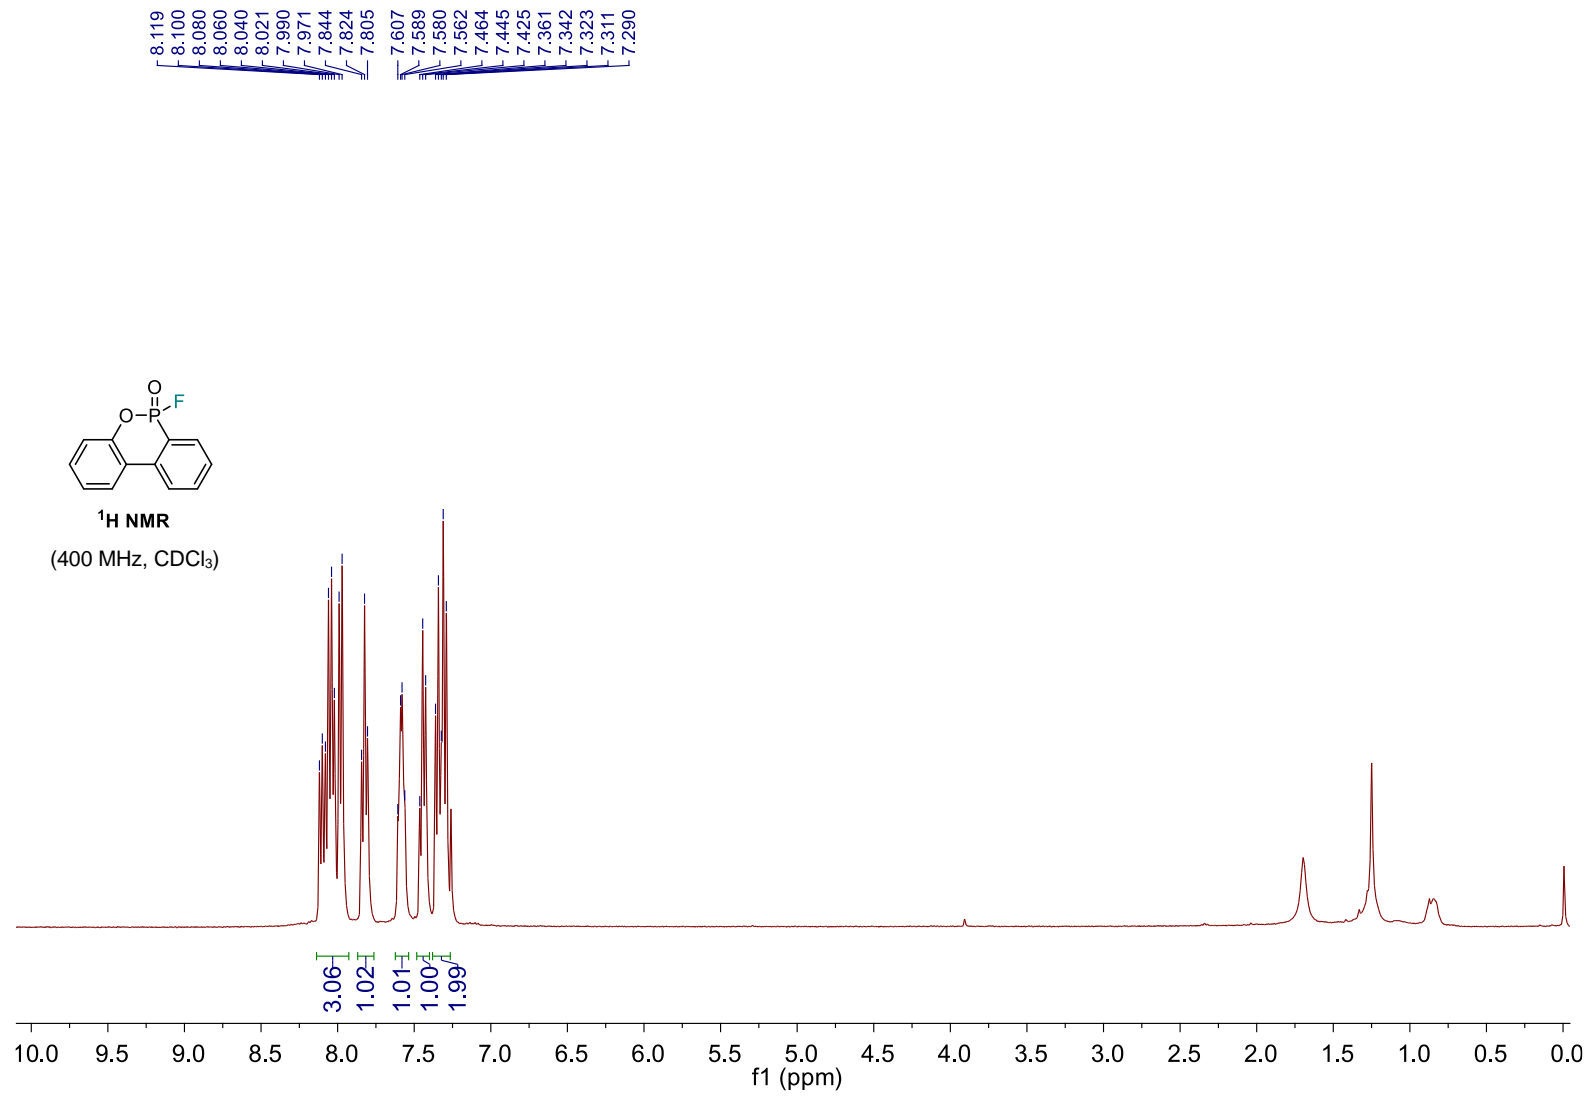

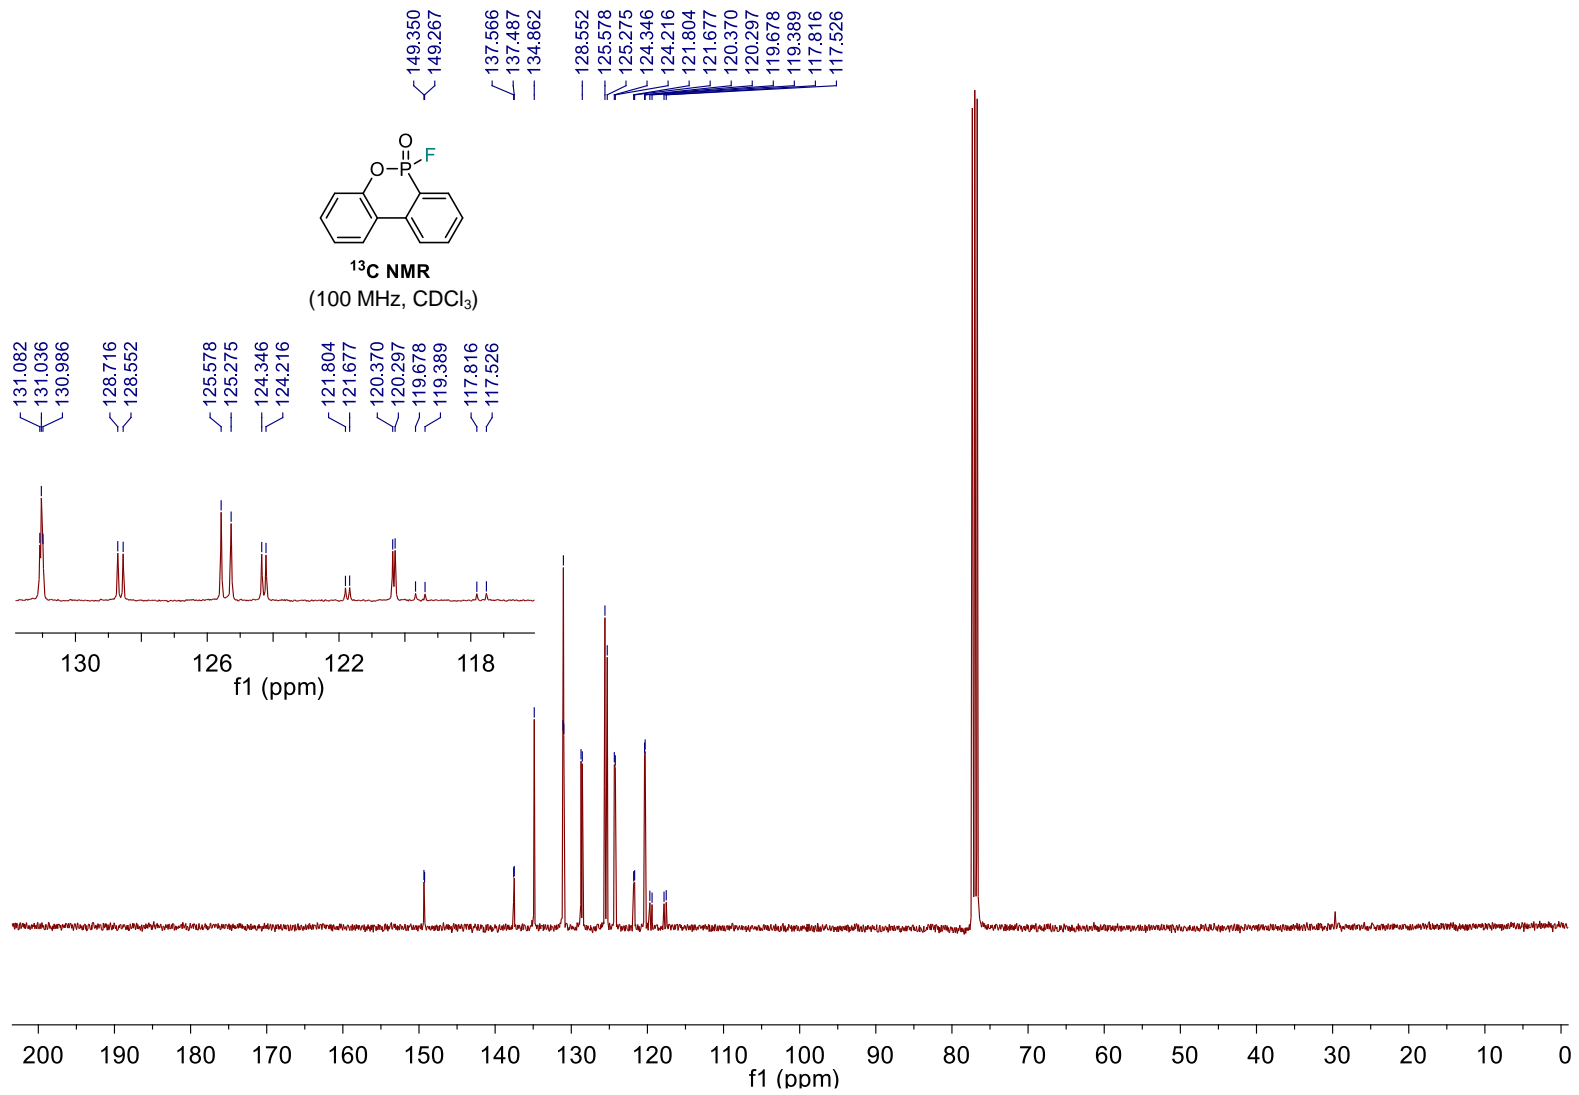

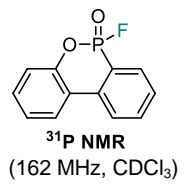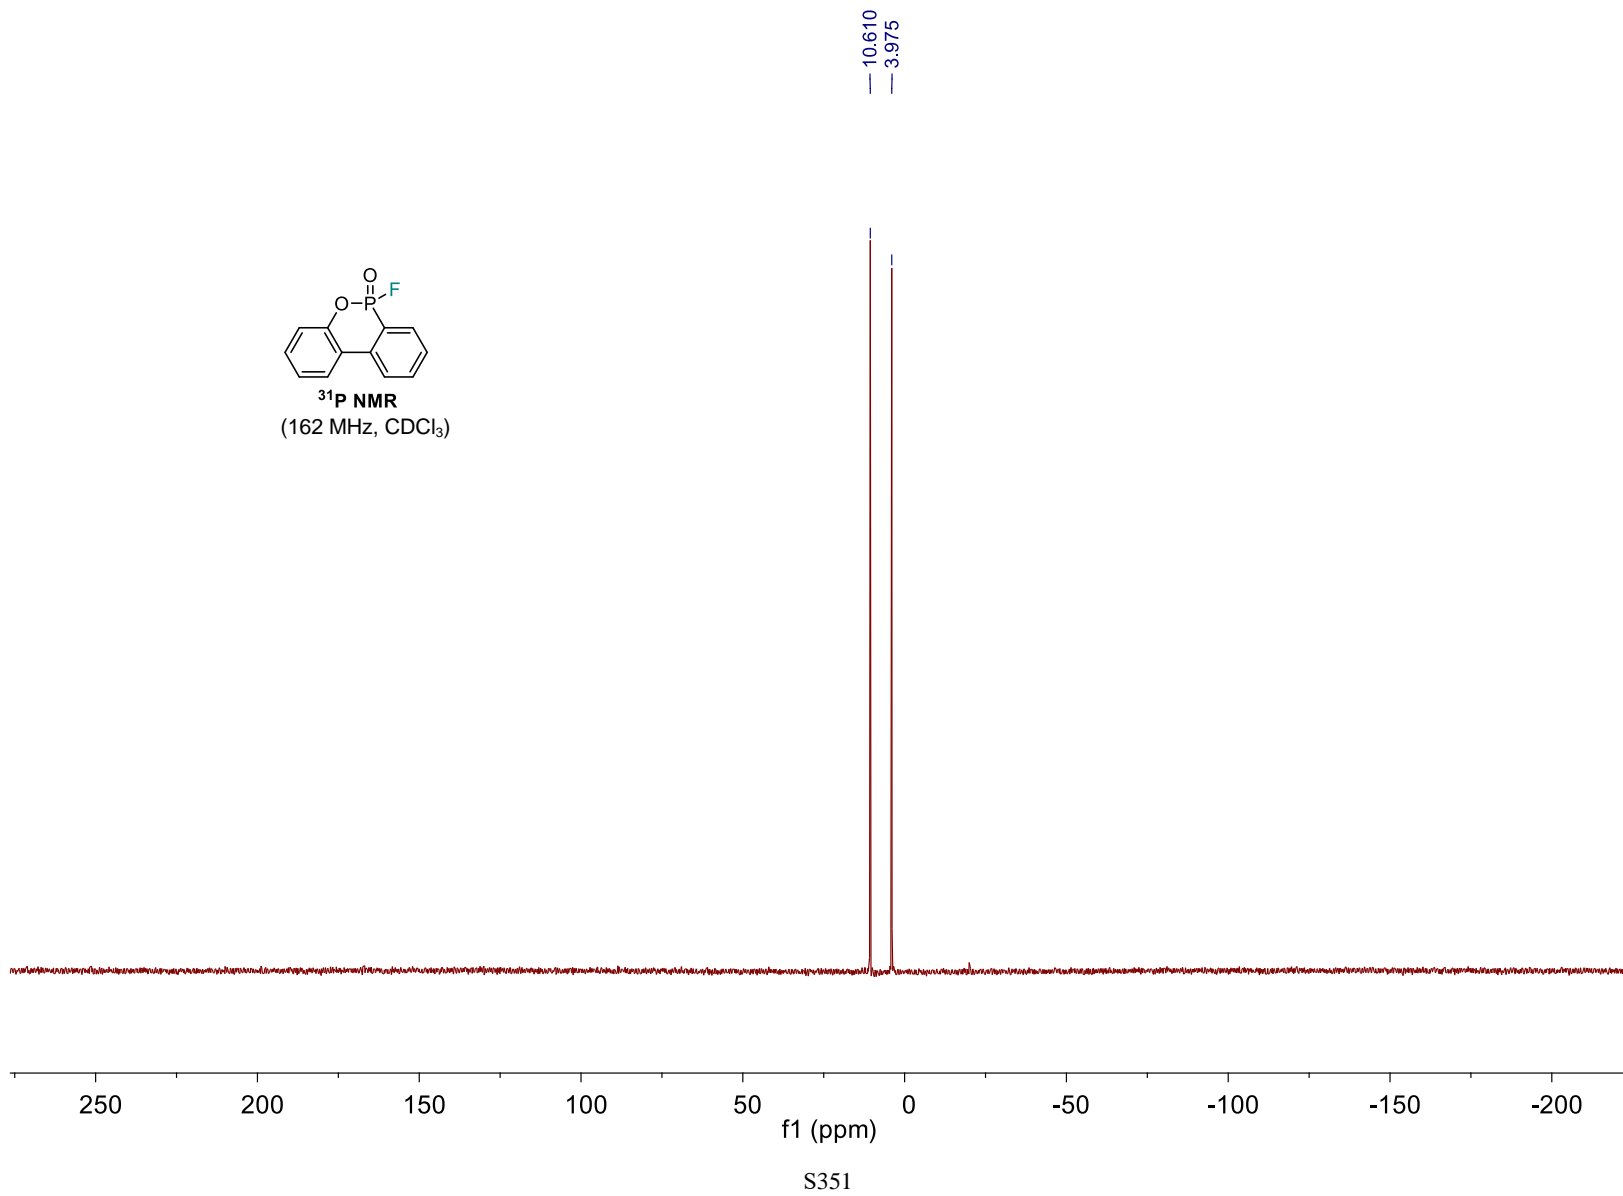

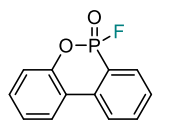

**<sup>19</sup>F NMR**  
(376 MHz, CDCl<sub>3</sub>)

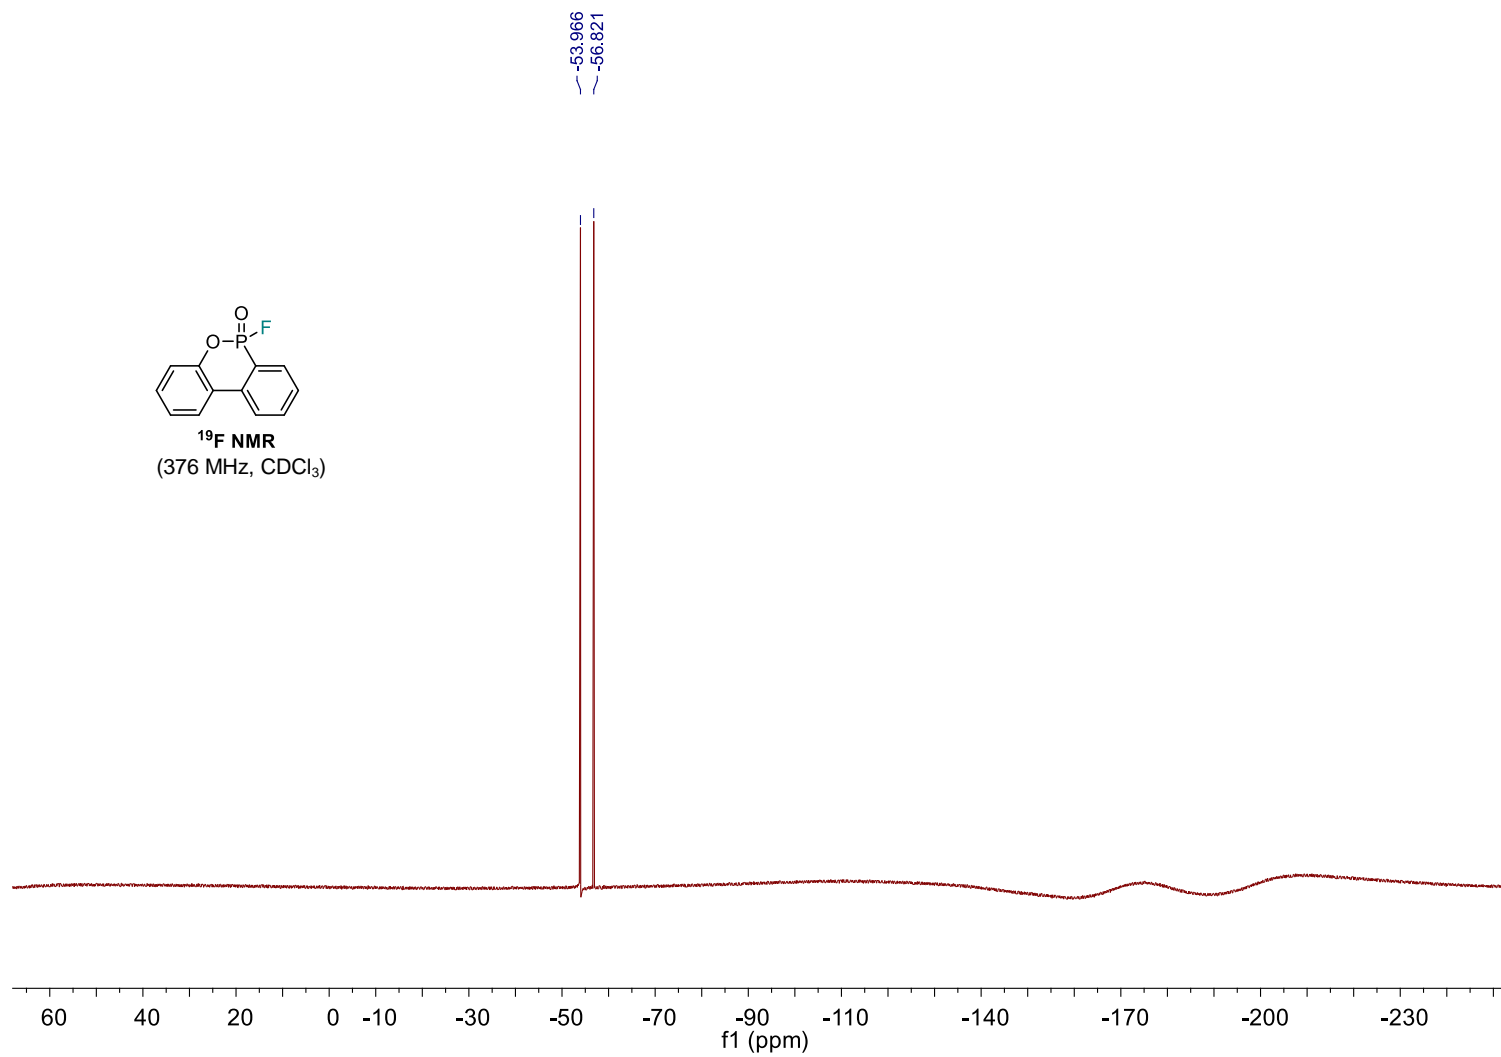



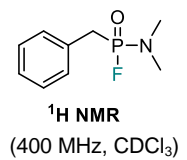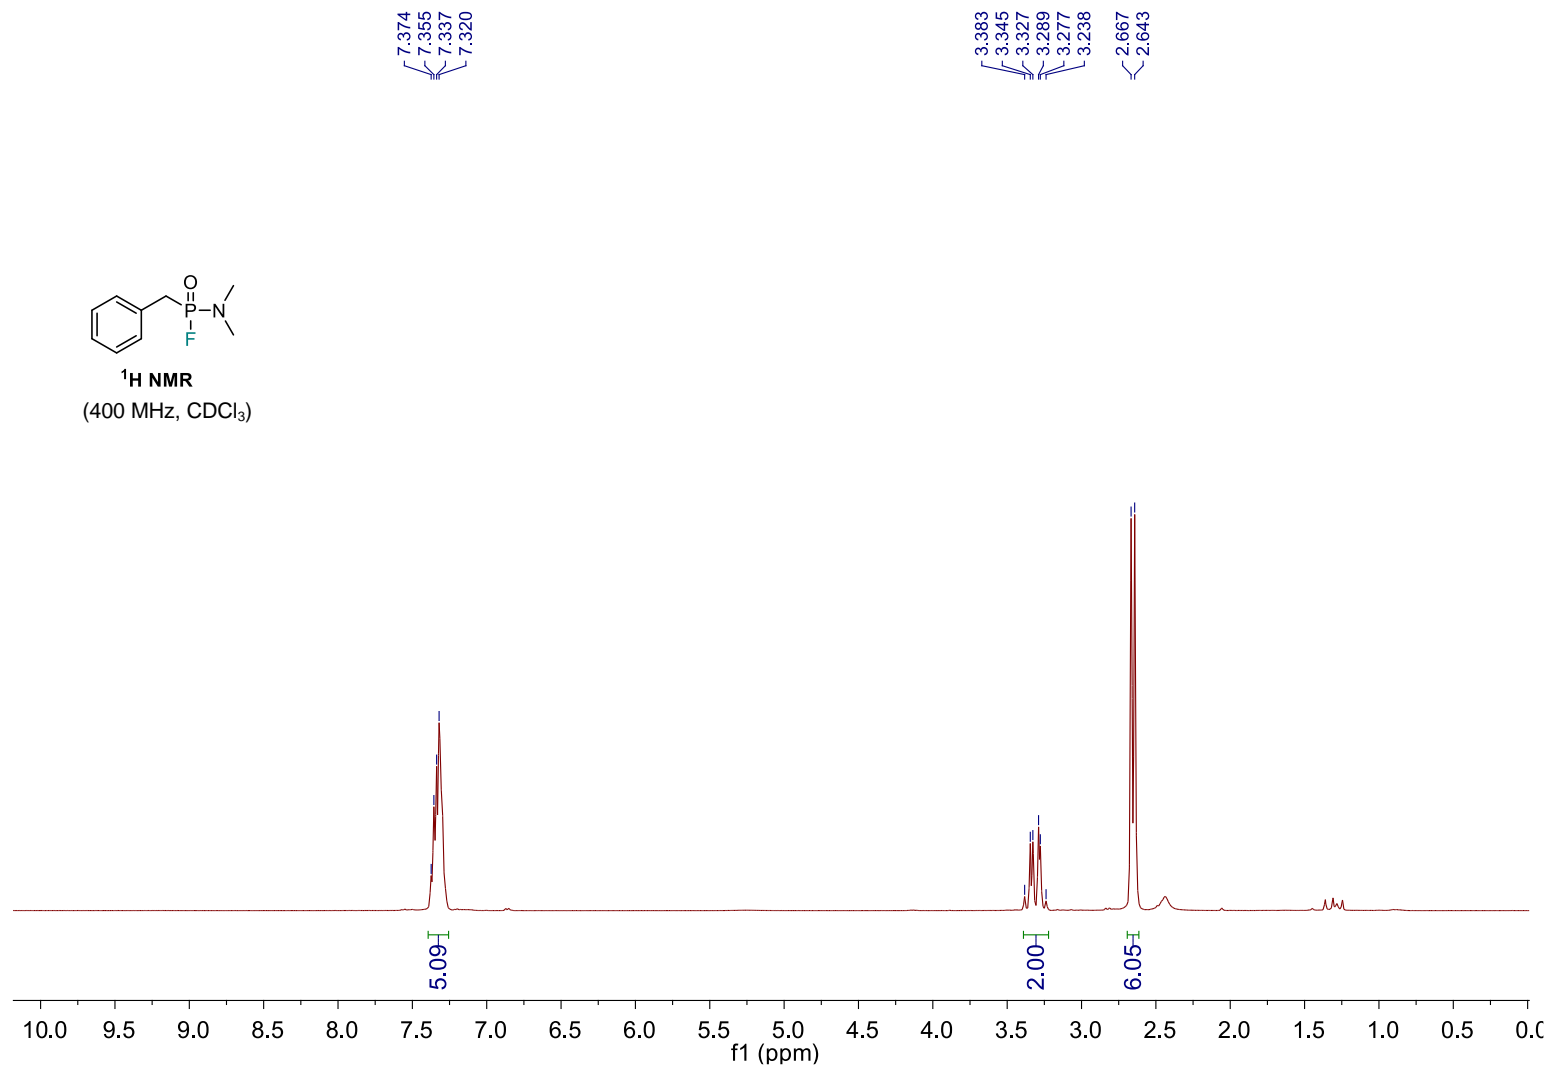

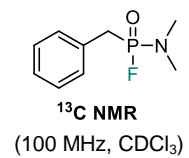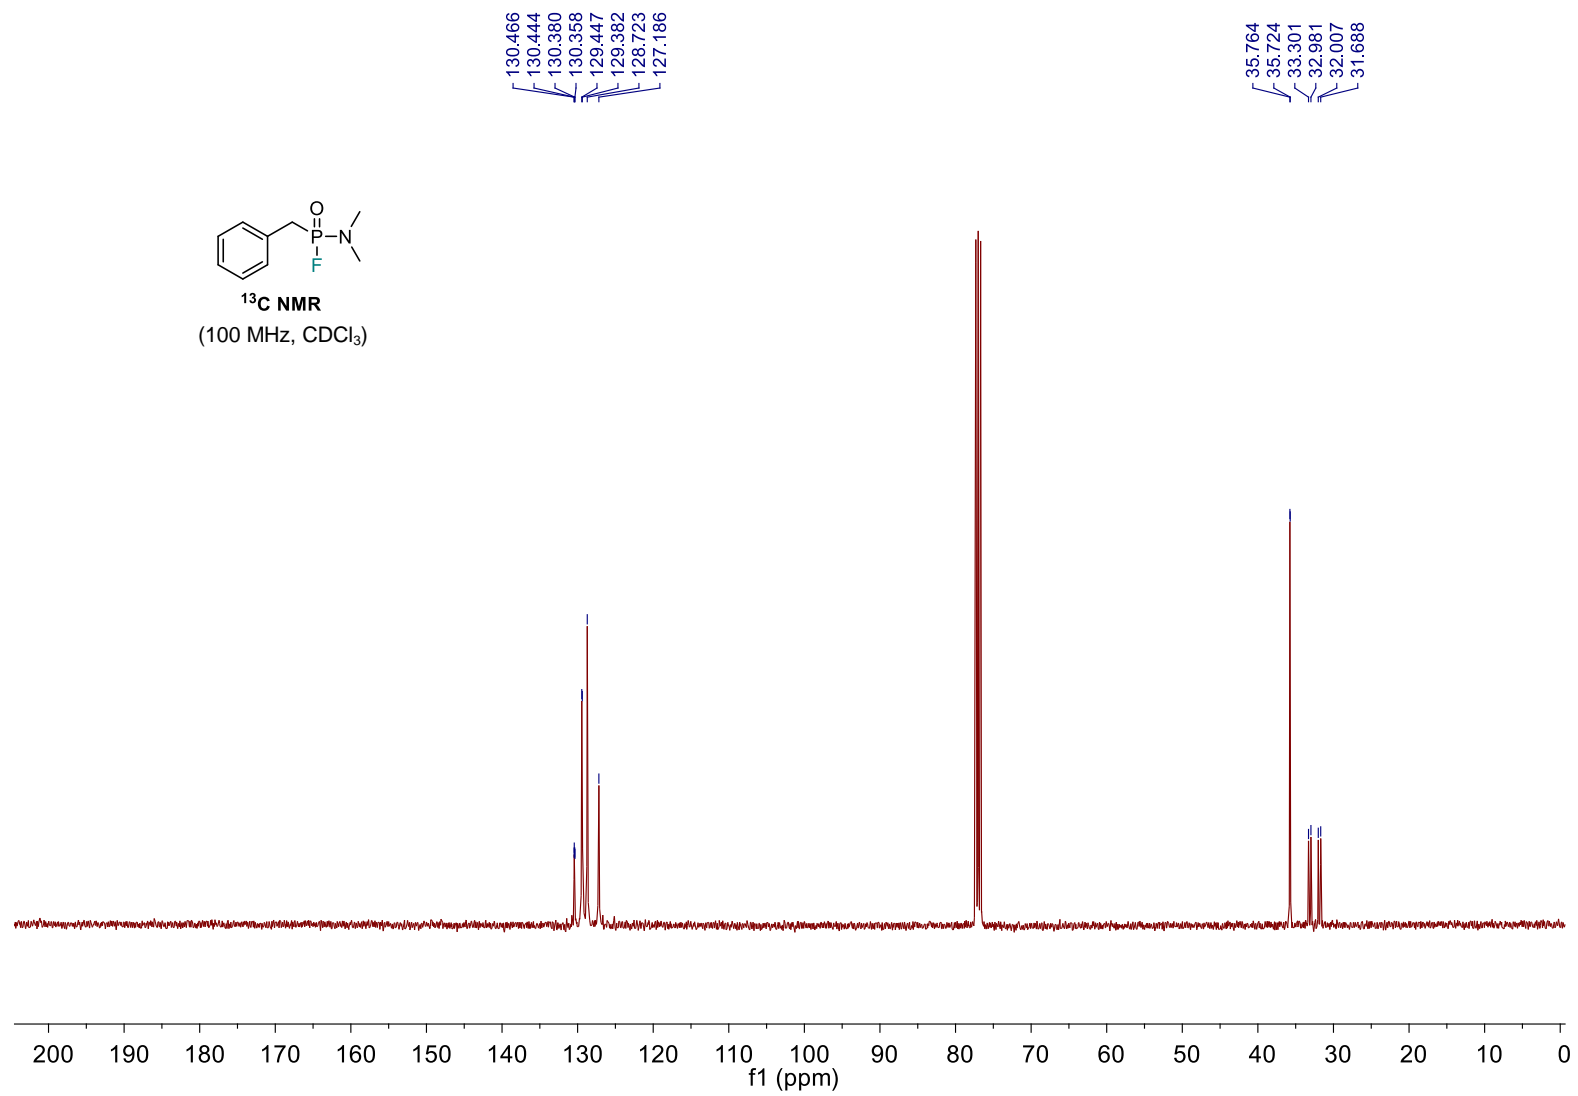

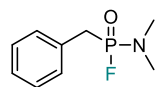

**<sup>31</sup>P NMR**  
(162 MHz, CDCl<sub>3</sub>)

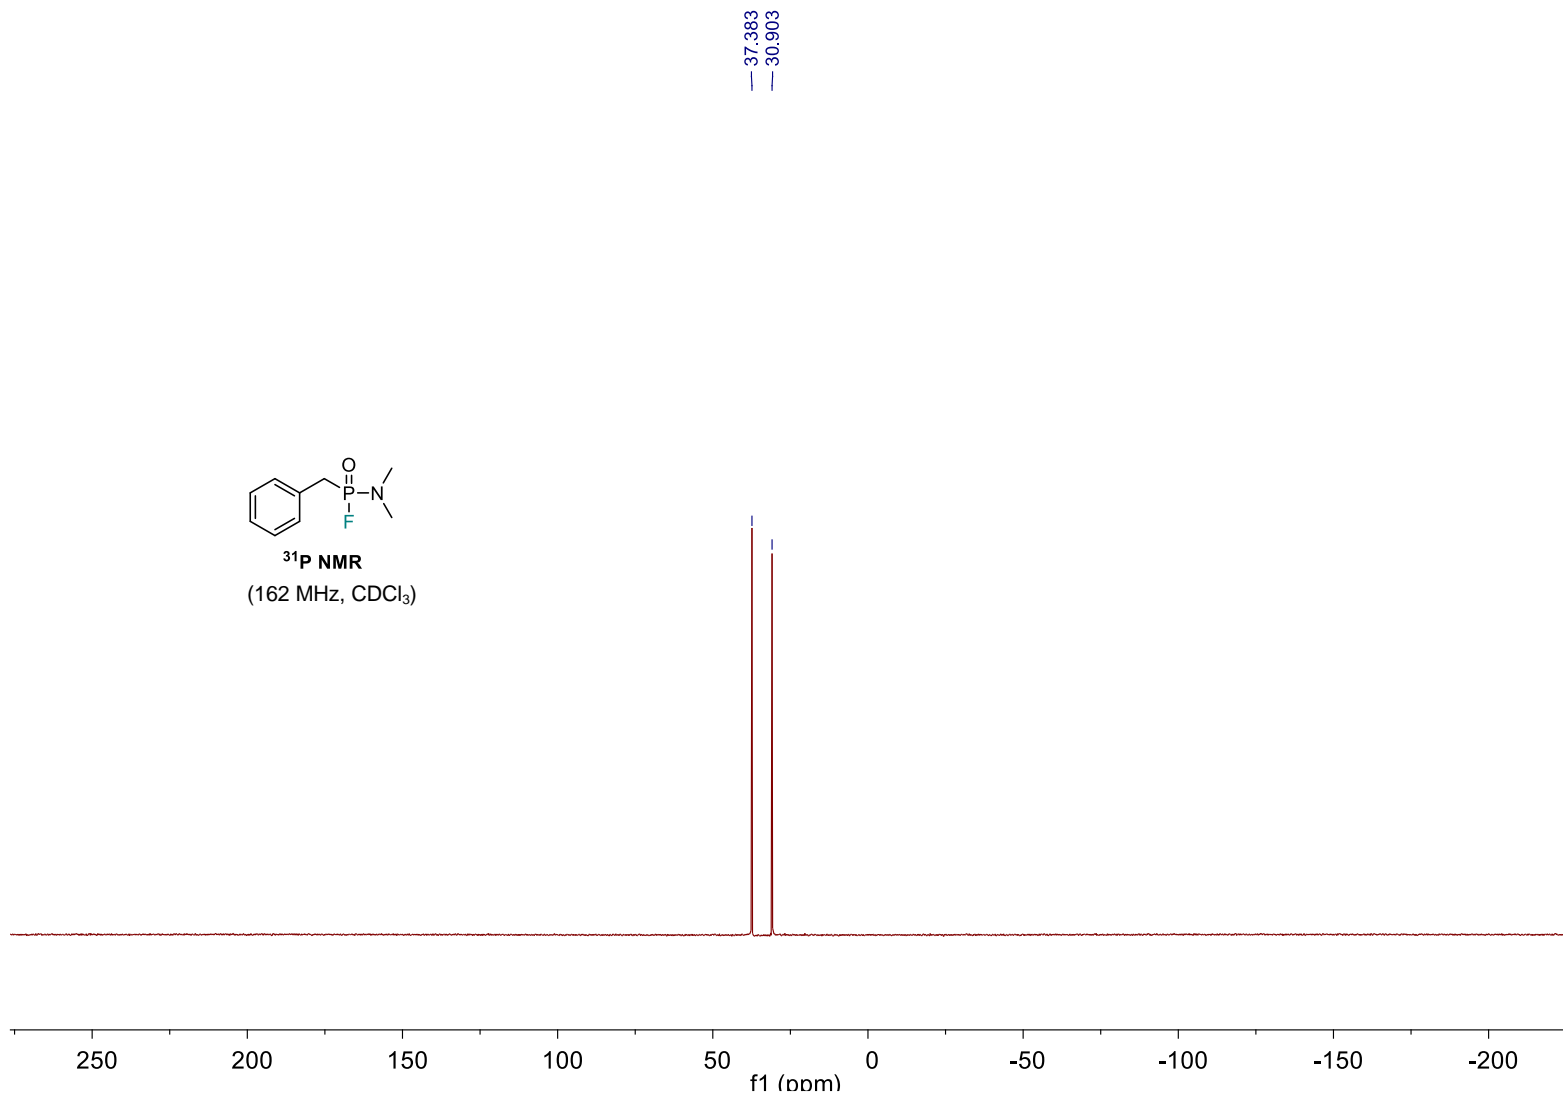

S355

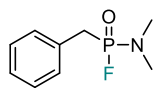

**<sup>19</sup>F NMR**  
(376 MHz, CDCl<sub>3</sub>)

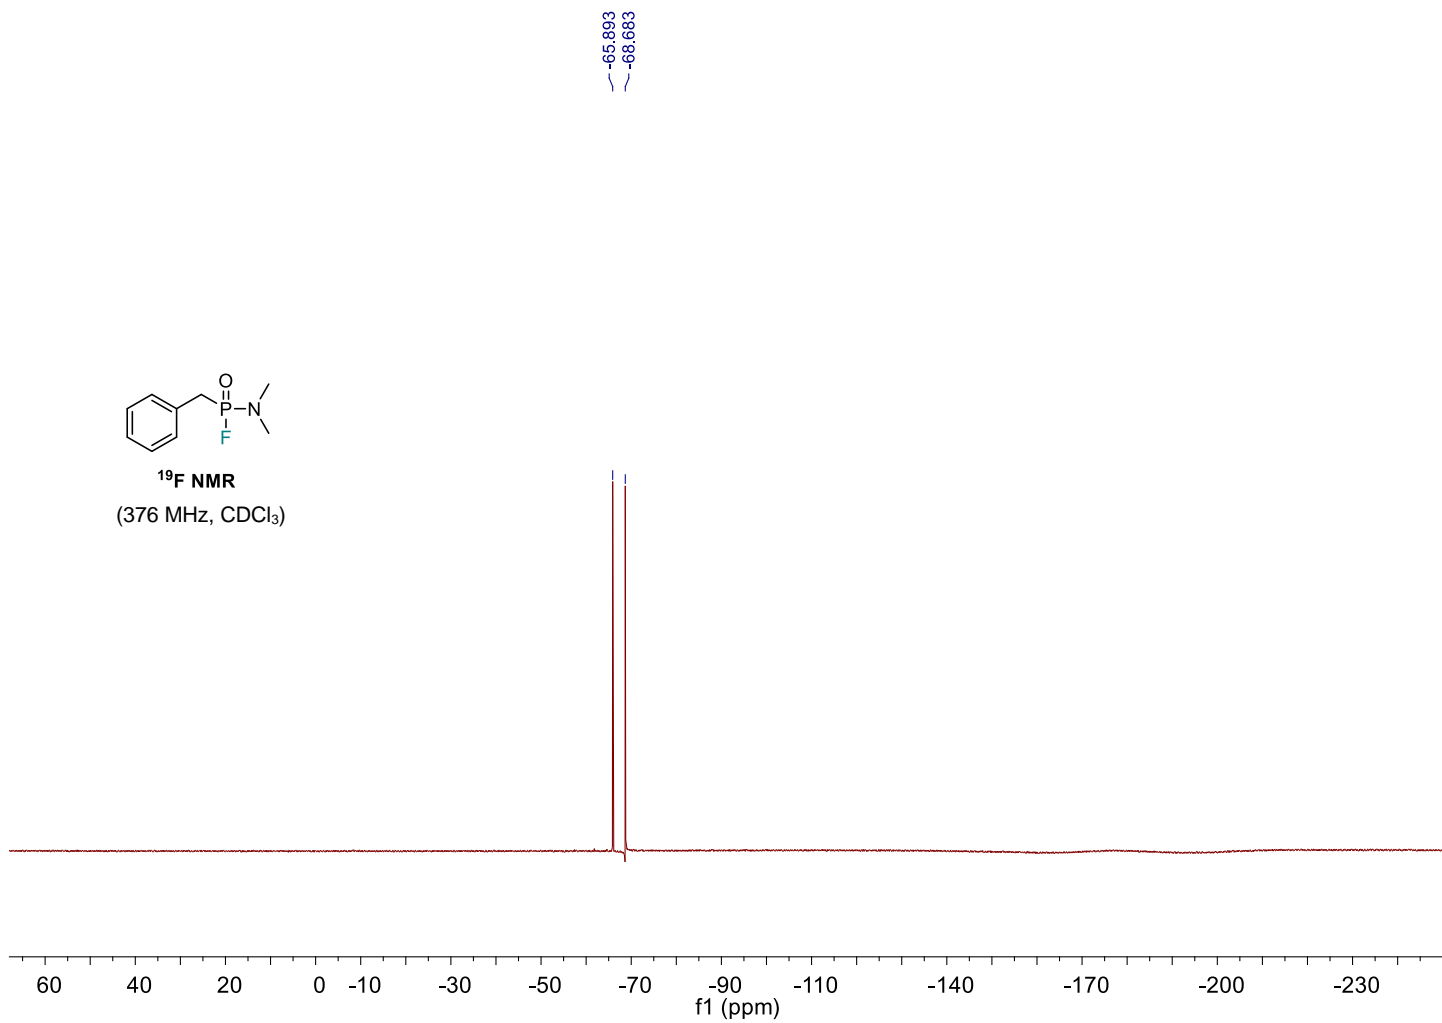

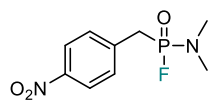

<sup>1</sup>H NMR  
(400 MHz, CDCl<sub>3</sub>)

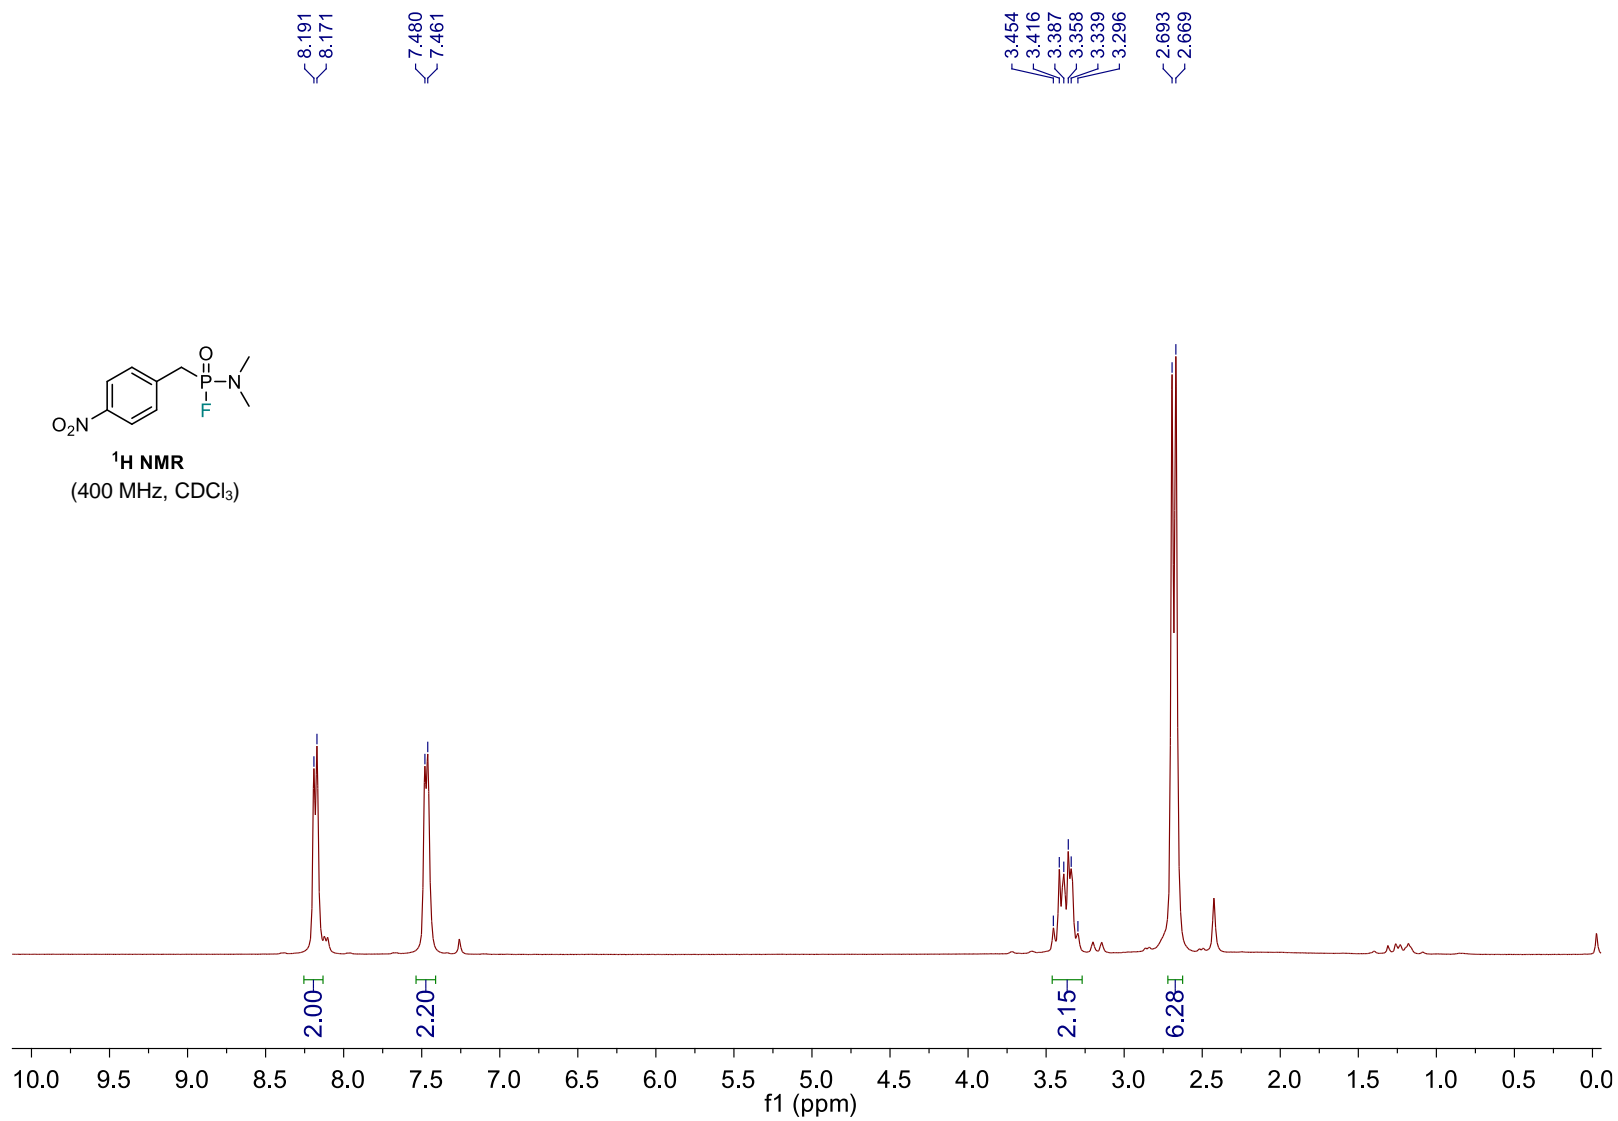

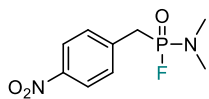

**<sup>13</sup>C NMR**  
(100 MHz, CDCl<sub>3</sub>)

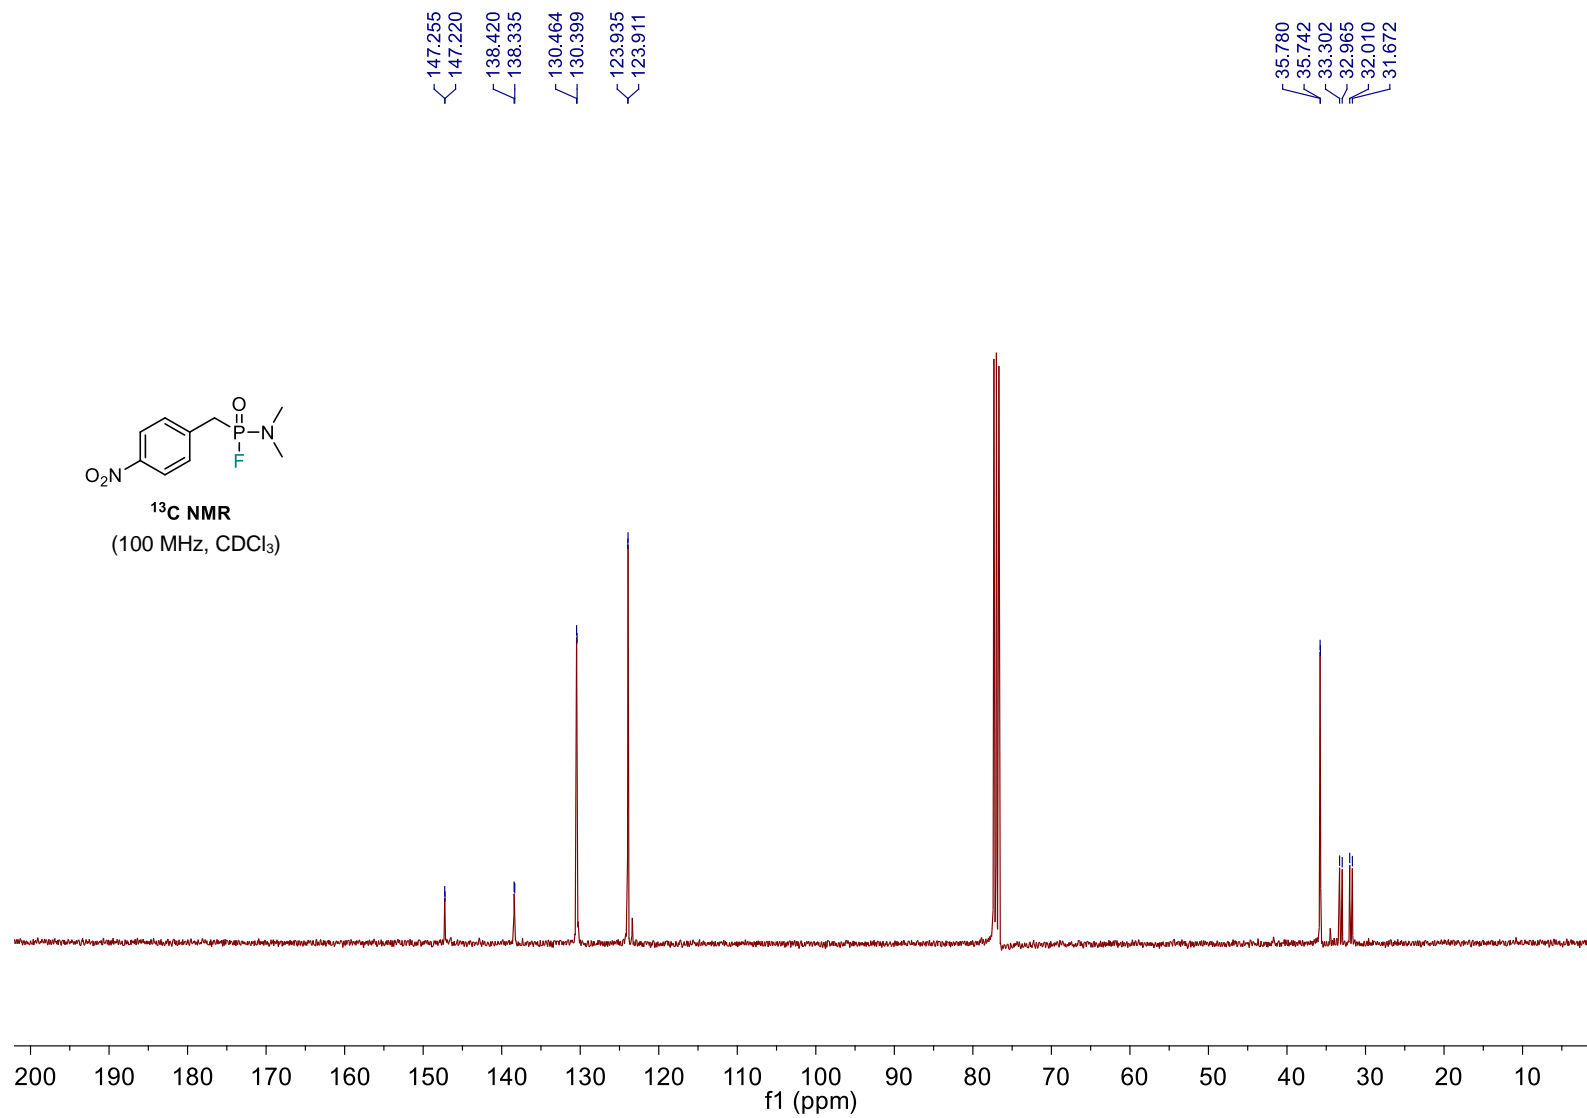

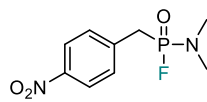

**<sup>31</sup>P NMR**  
(162 MHz, CDCl<sub>3</sub>)

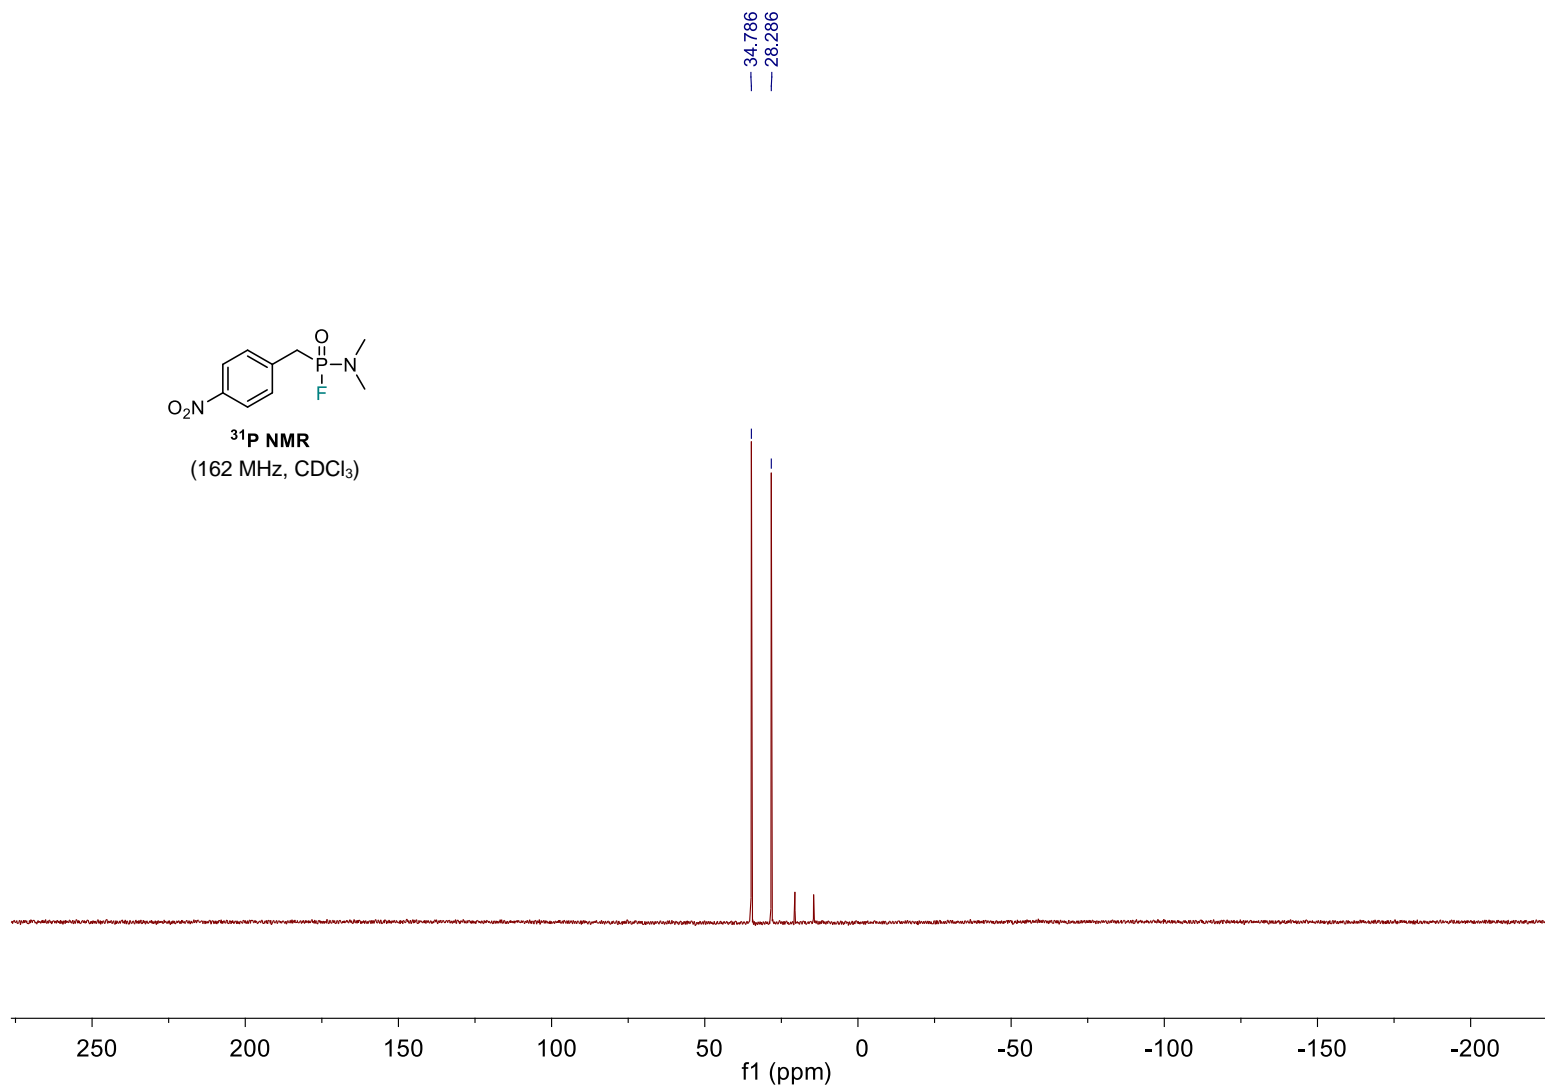

S359

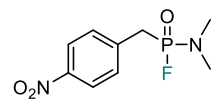

<sup>19</sup>F NMR  
(376 MHz, CDCl<sub>3</sub>)

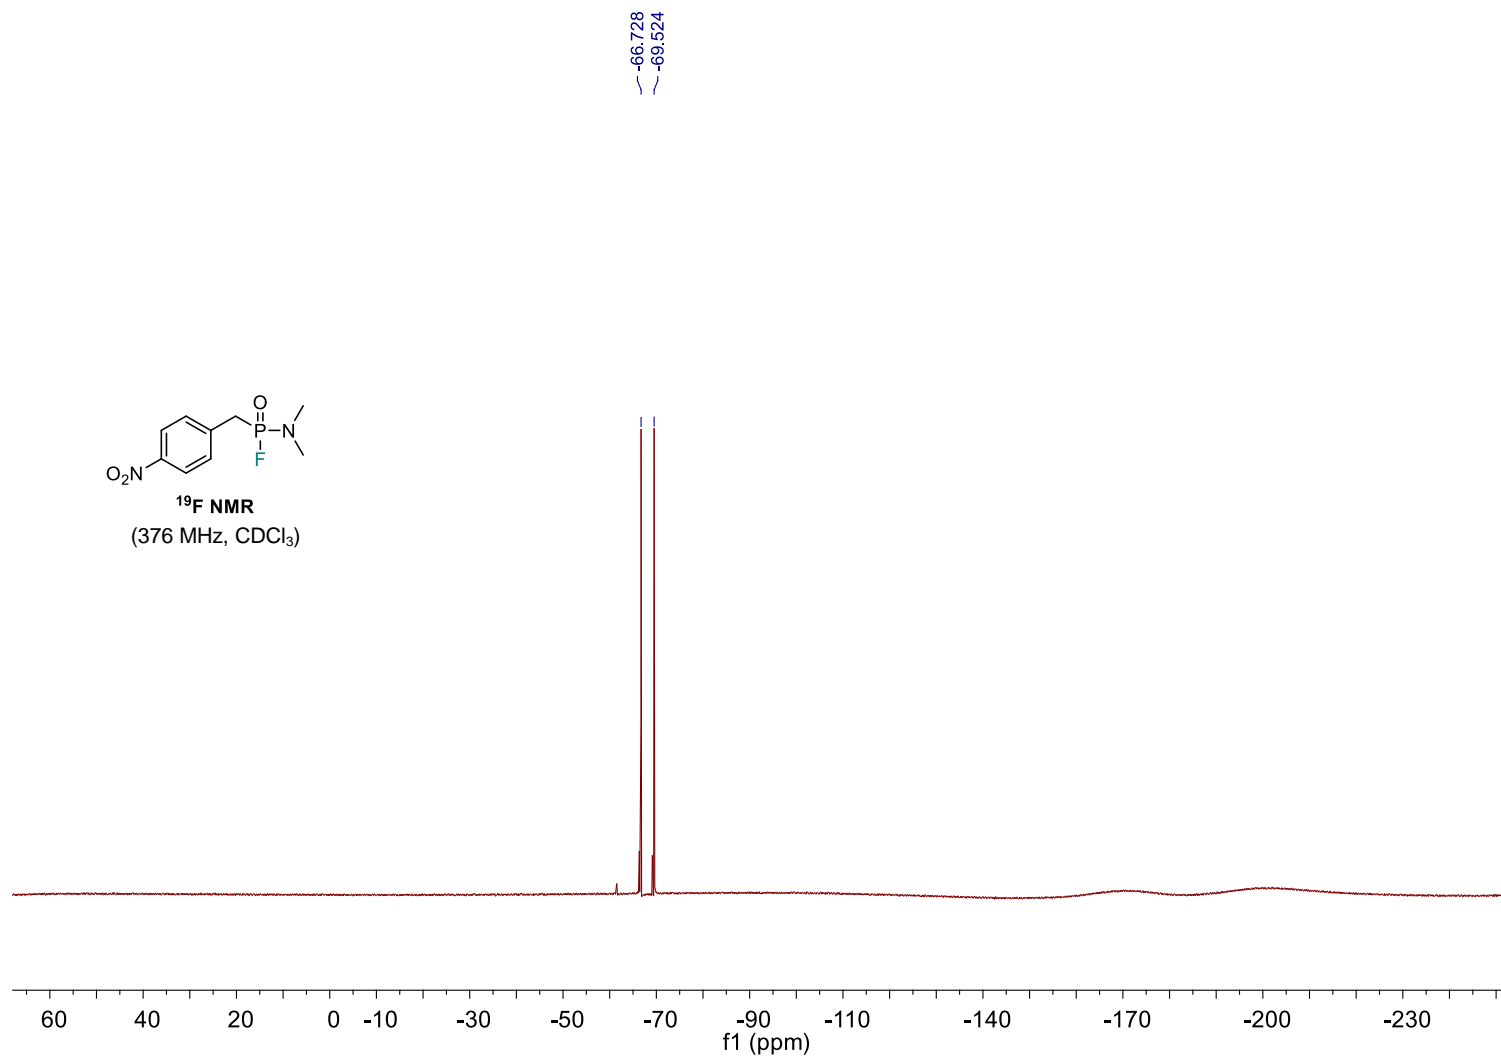

S360



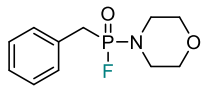

<sup>1</sup>H NMR  
(400 MHz, CDCl<sub>3</sub>)

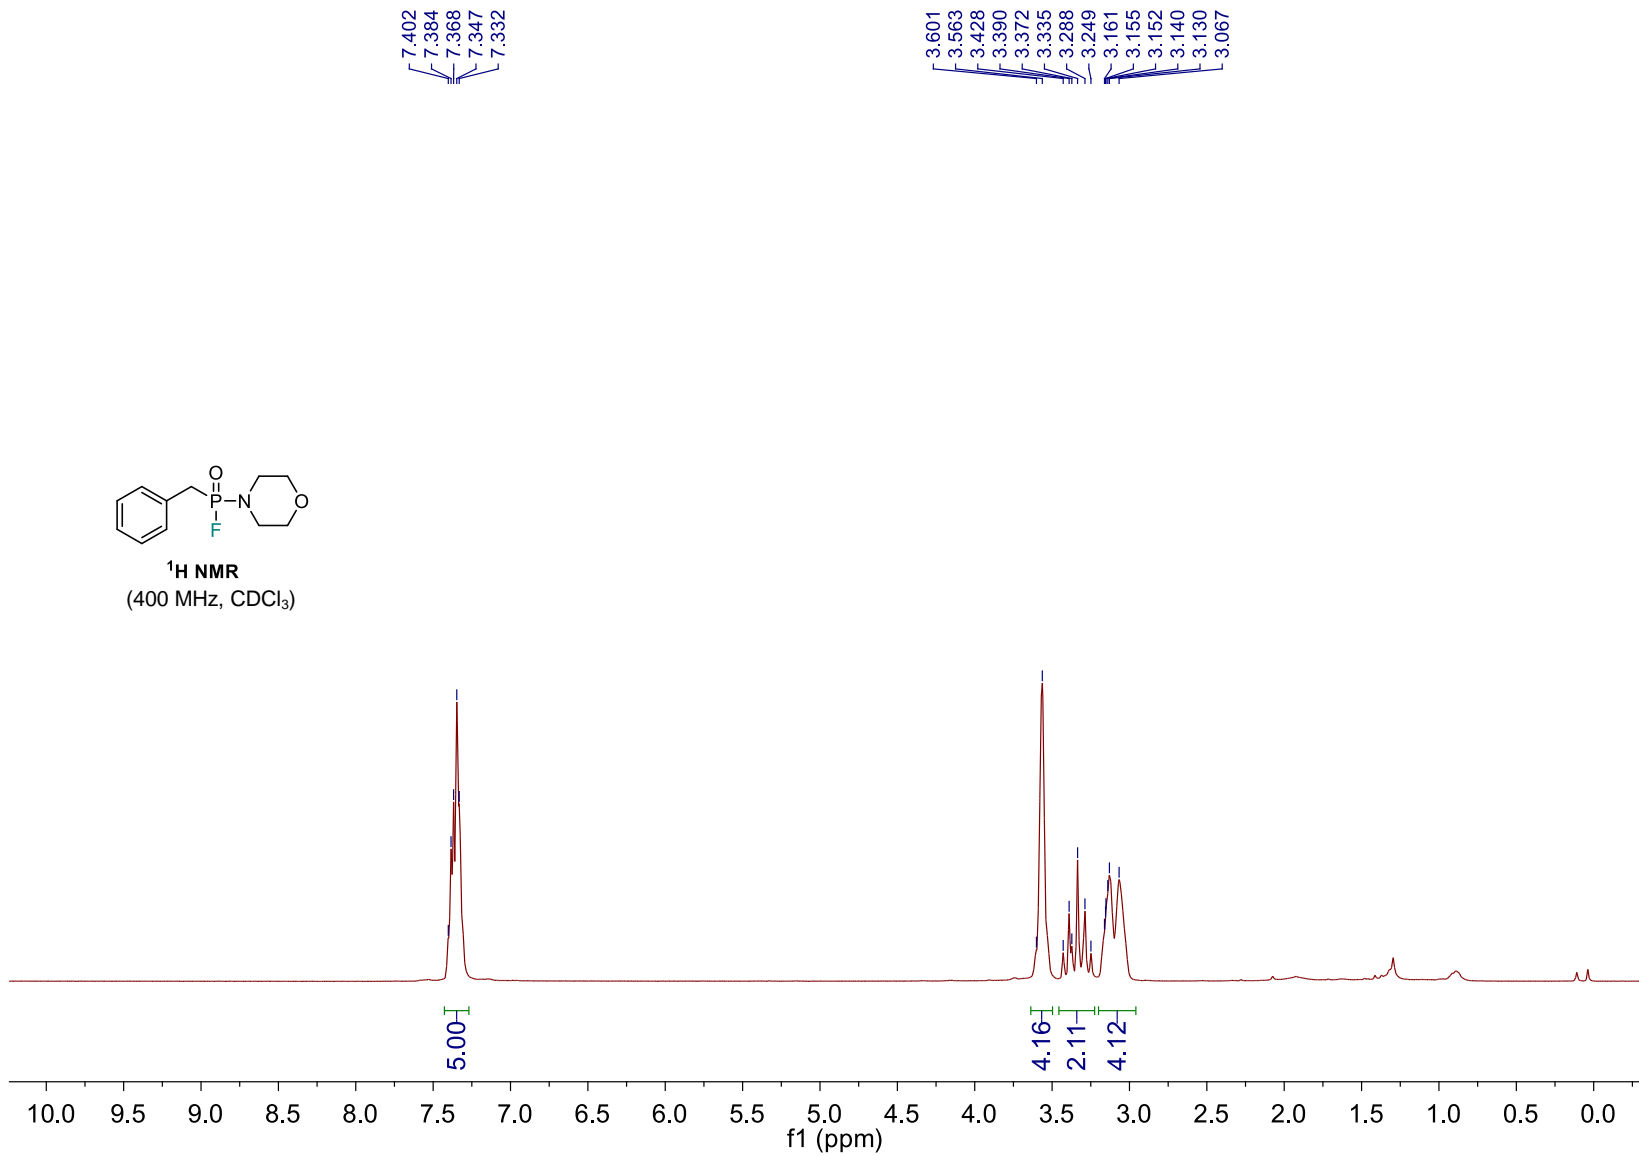

S361

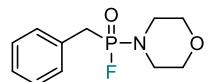

<sup>13</sup>C NMR  
(100 MHz, CDCl<sub>3</sub>)

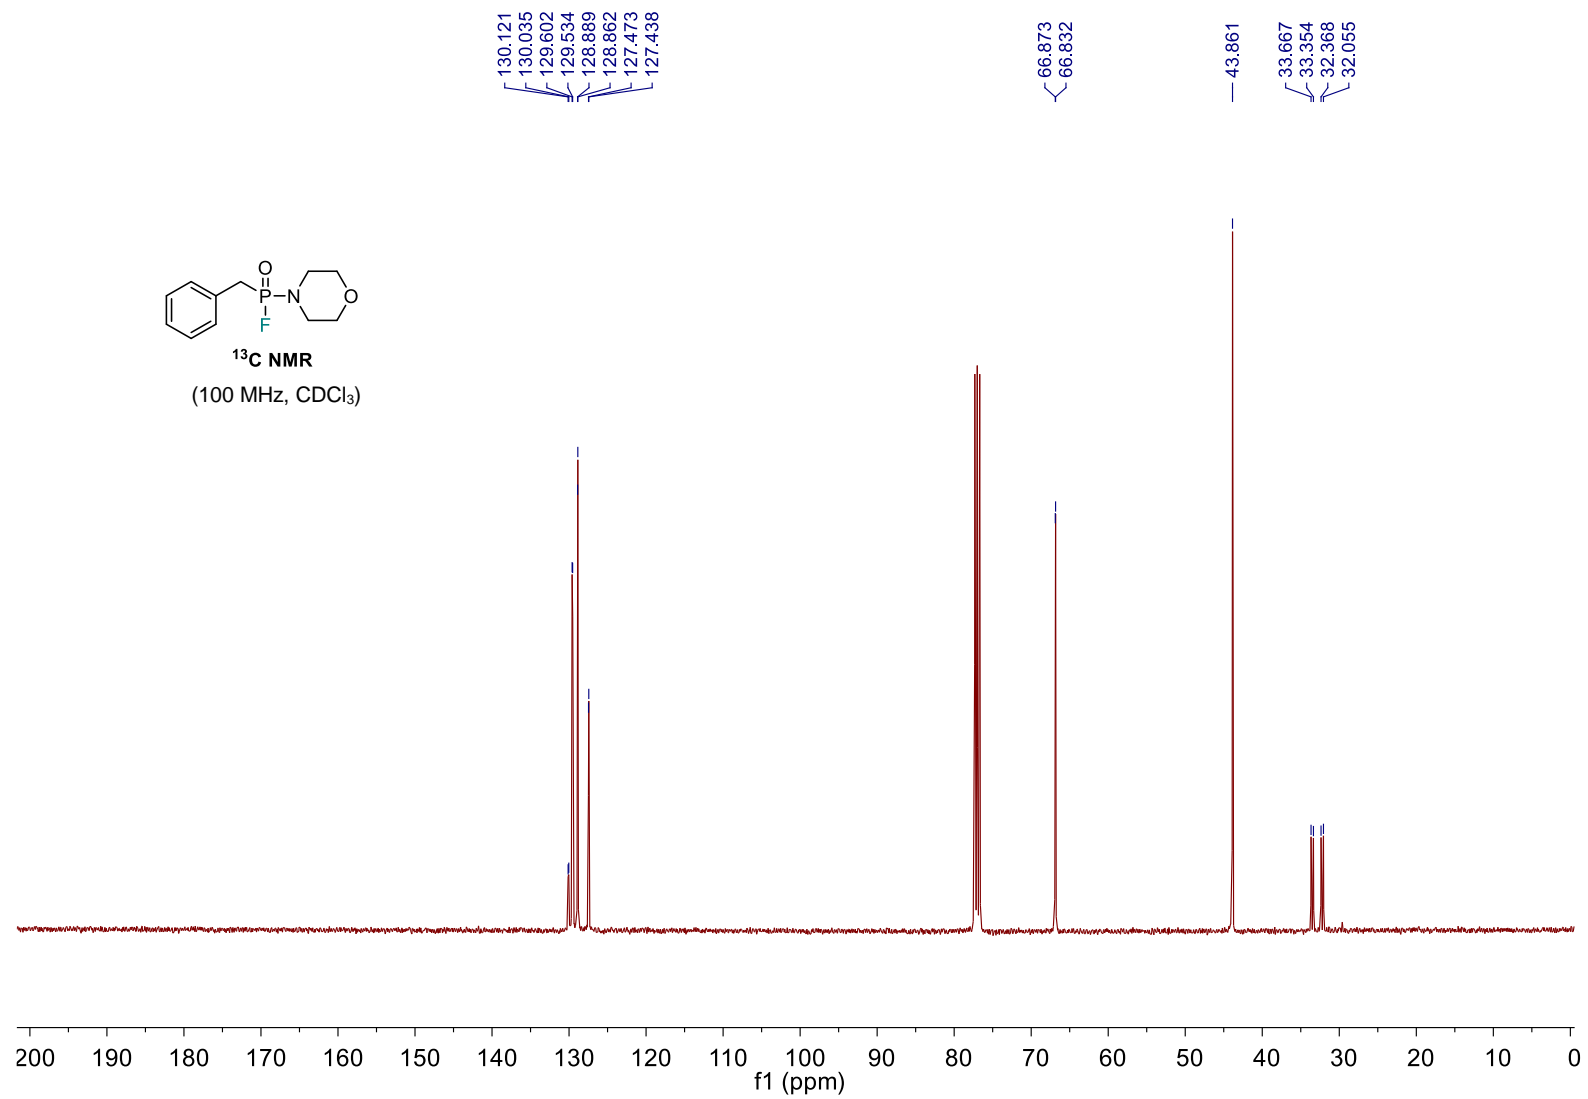

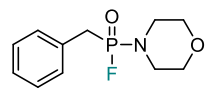

**<sup>31</sup>P NMR**  
(162 MHz, CDCl<sub>3</sub>)

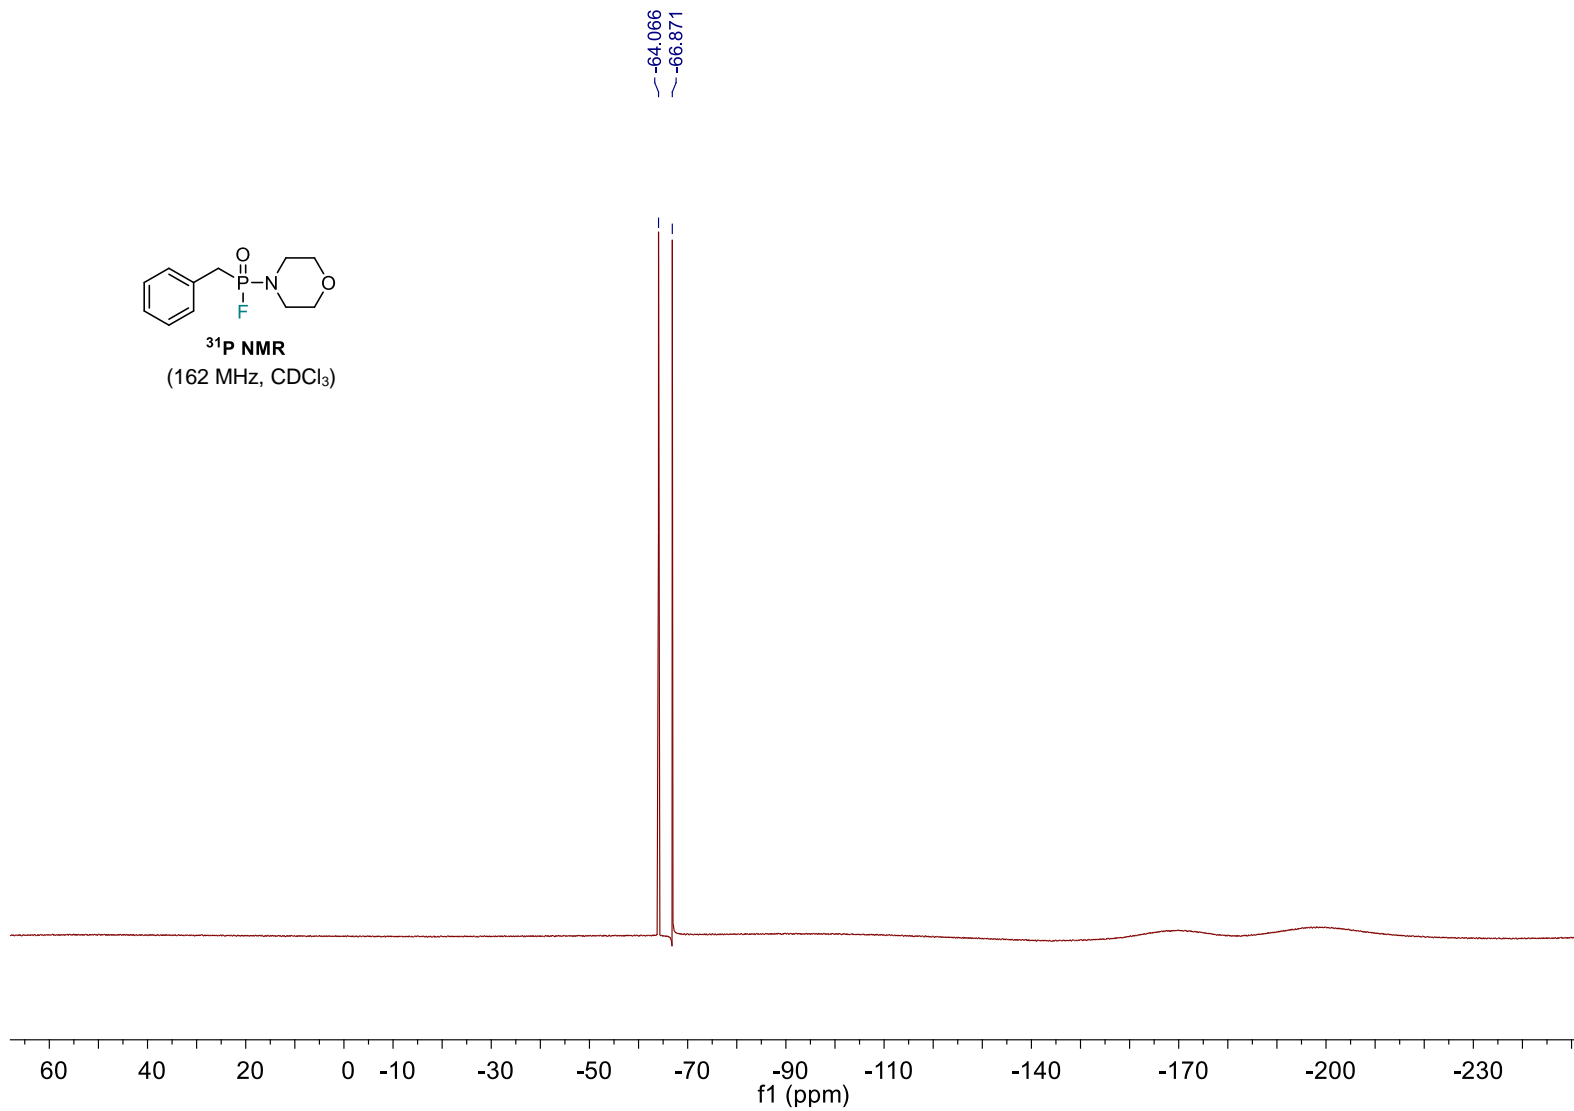

S363

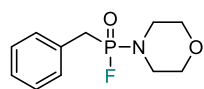

<sup>19</sup>F NMR  
(376 MHz, CDCl<sub>3</sub>)

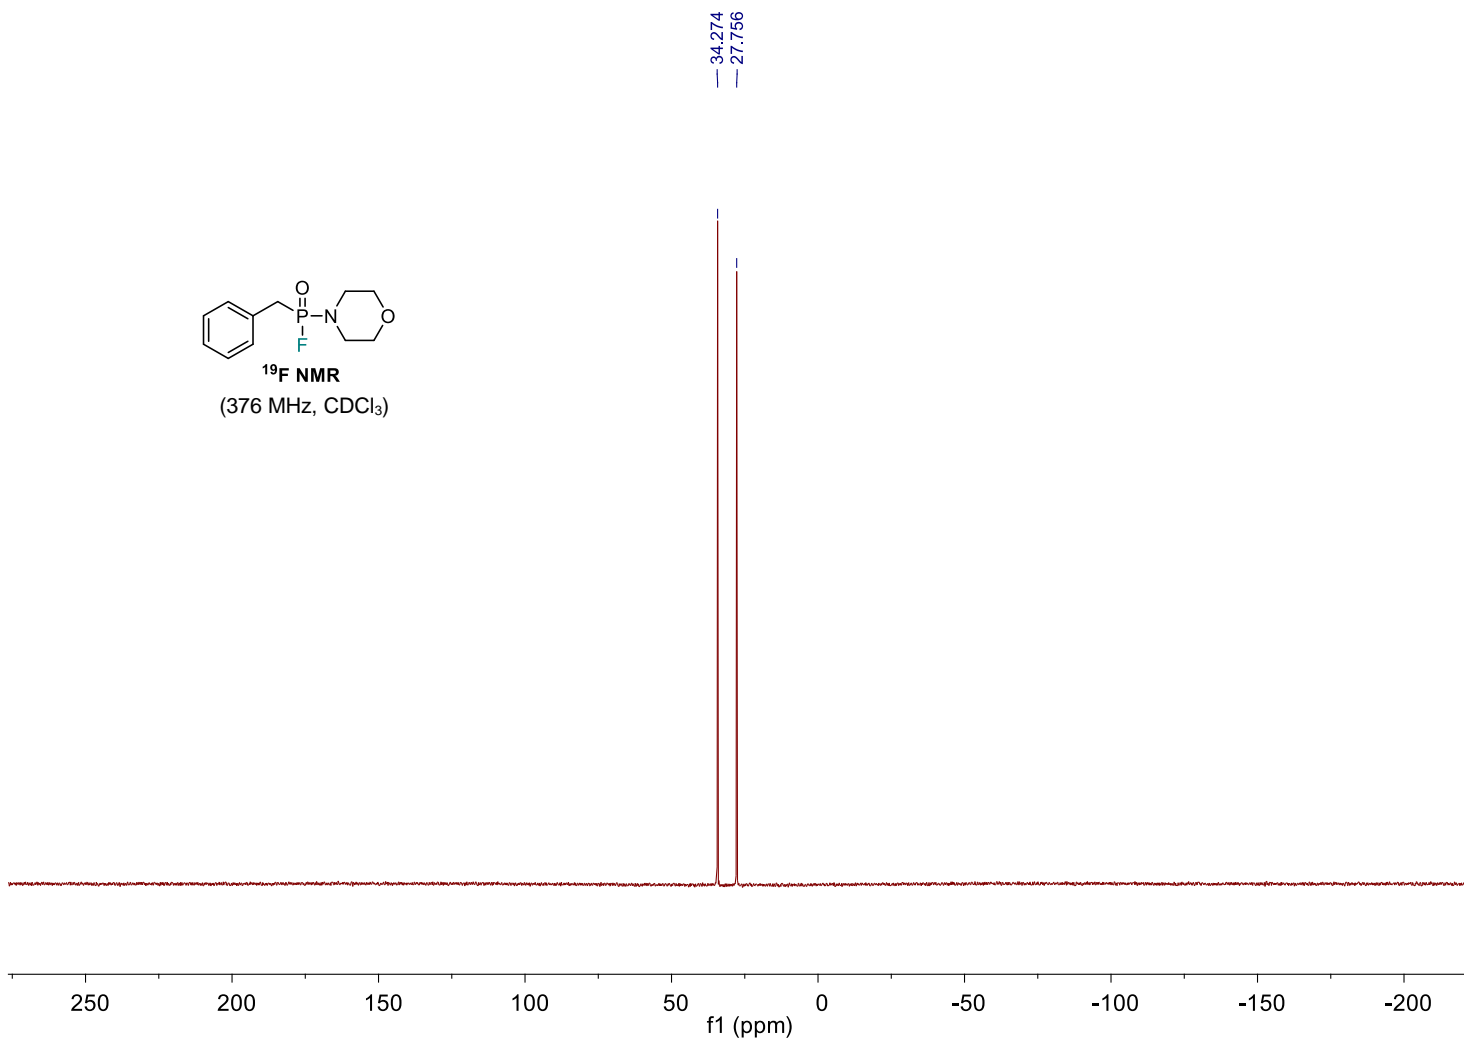

S364

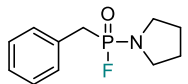

<sup>1</sup>H NMR  
(400 MHz, CDCl<sub>3</sub>)

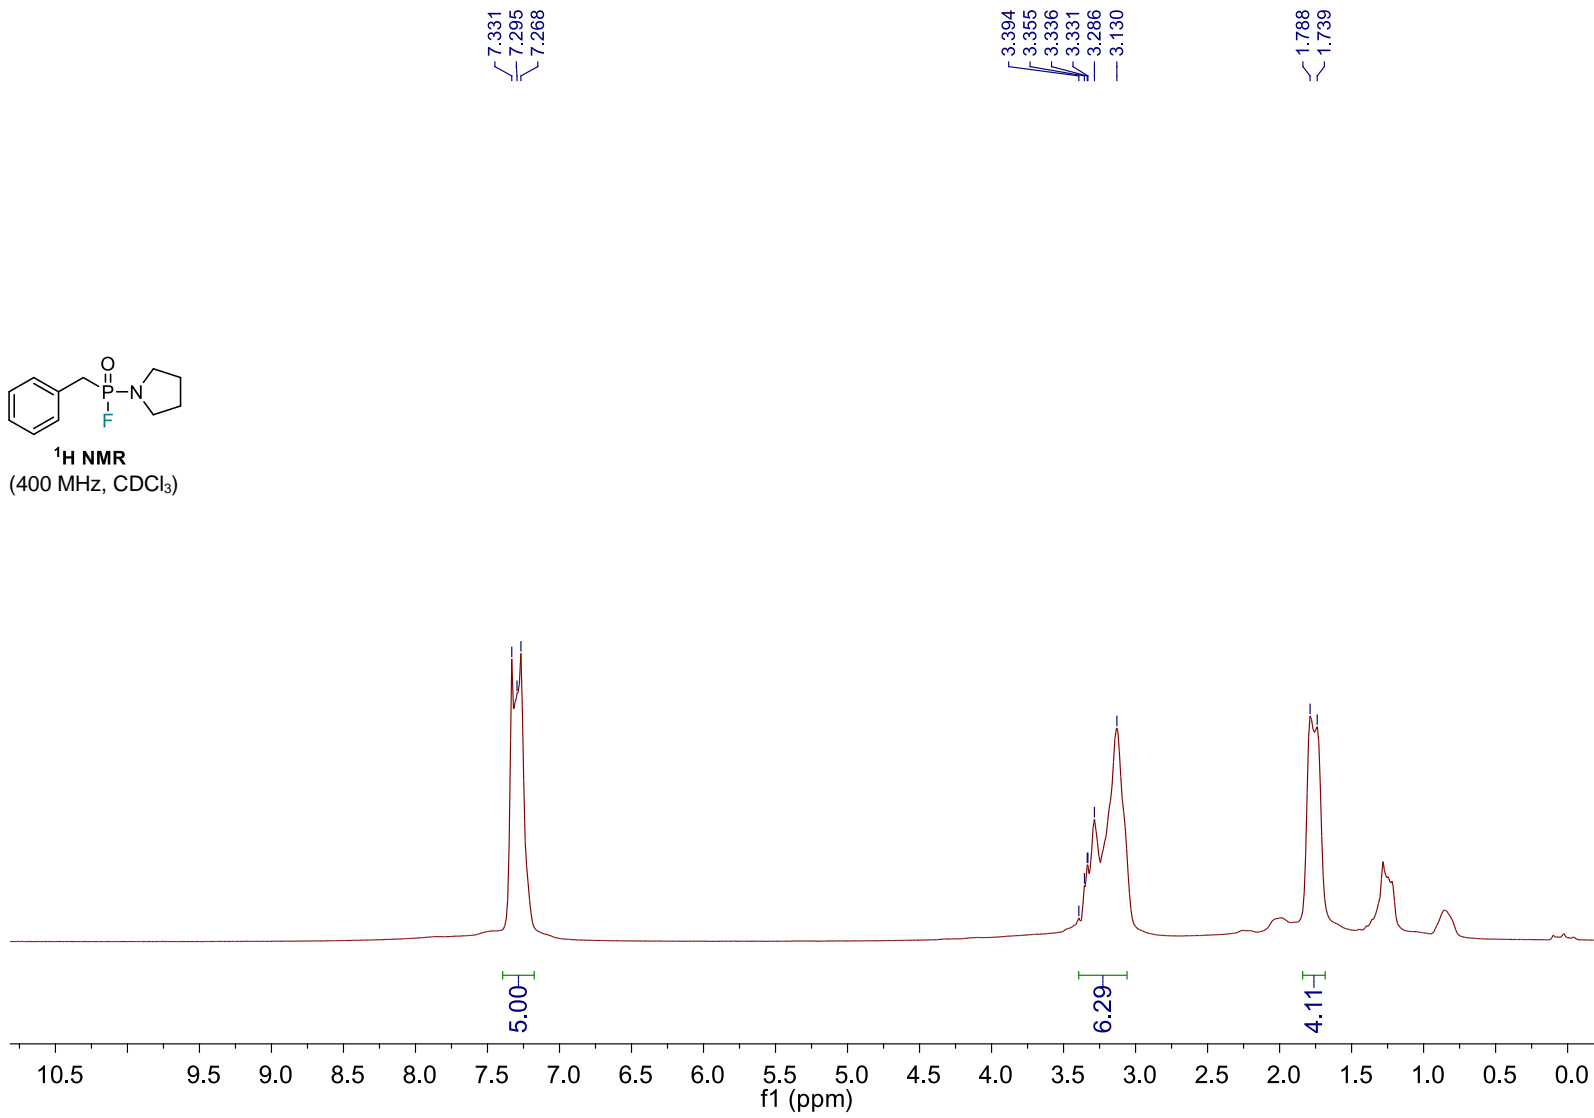

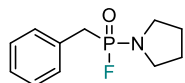

<sup>13</sup>C NMR  
(100 MHz, CDCl<sub>3</sub>)

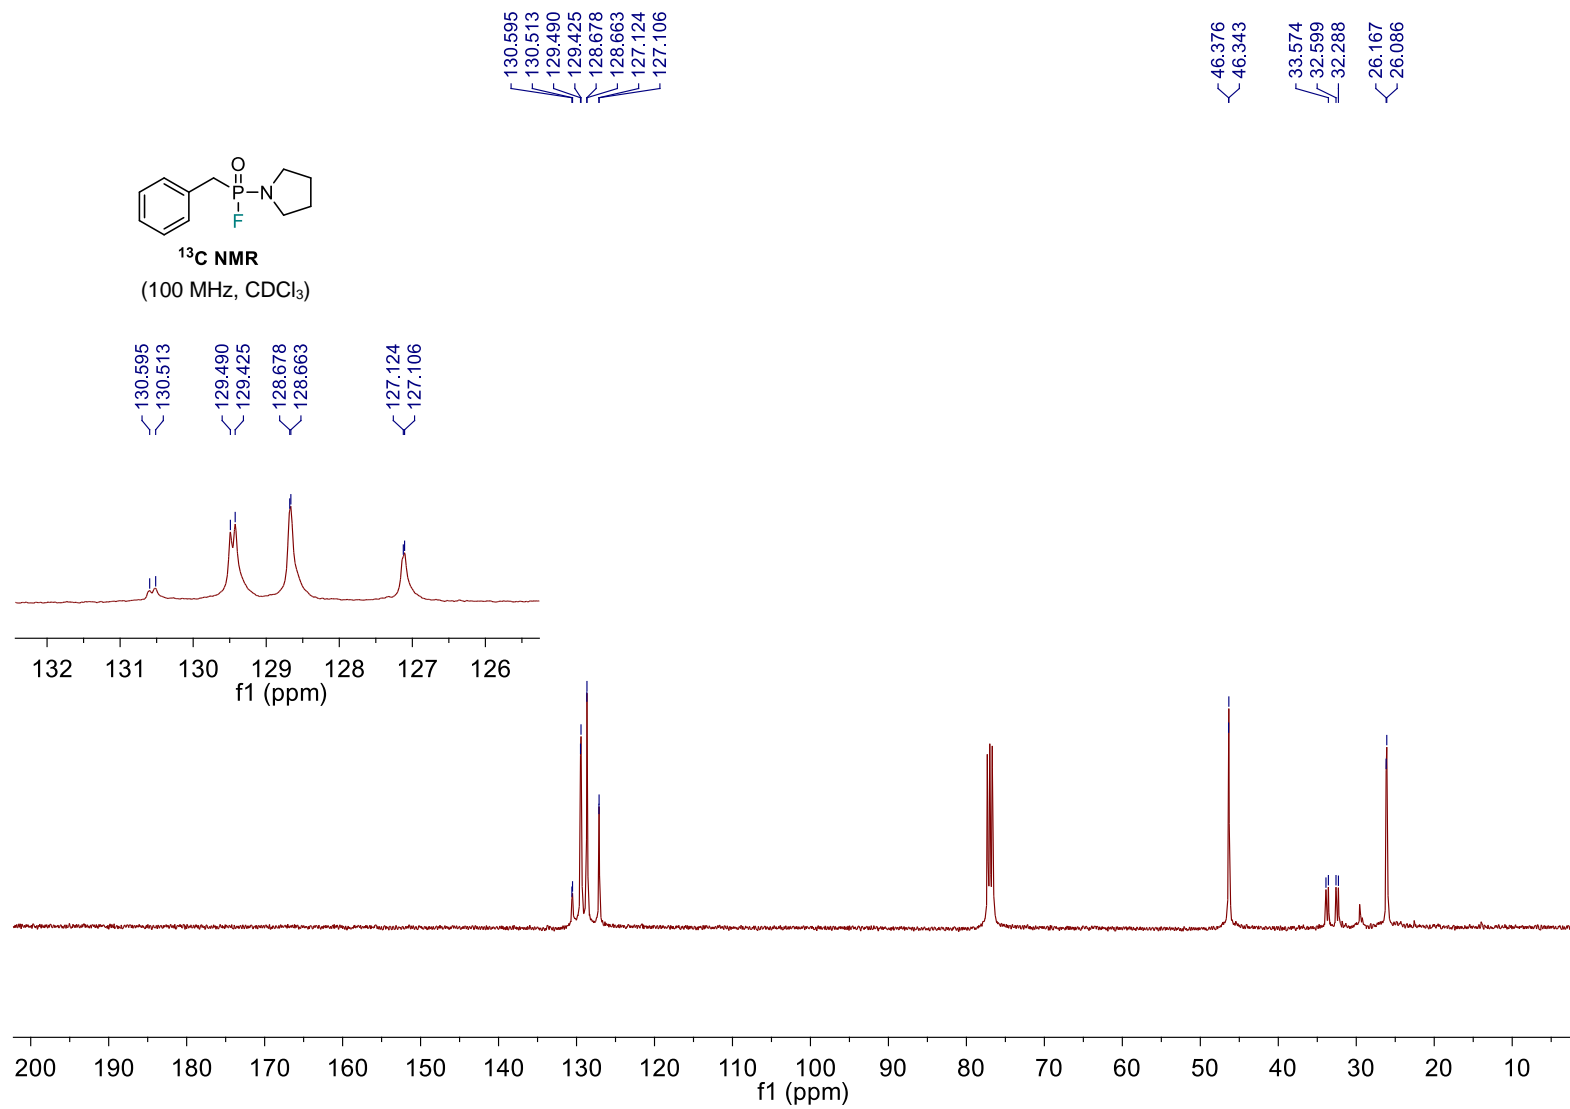

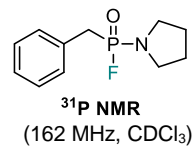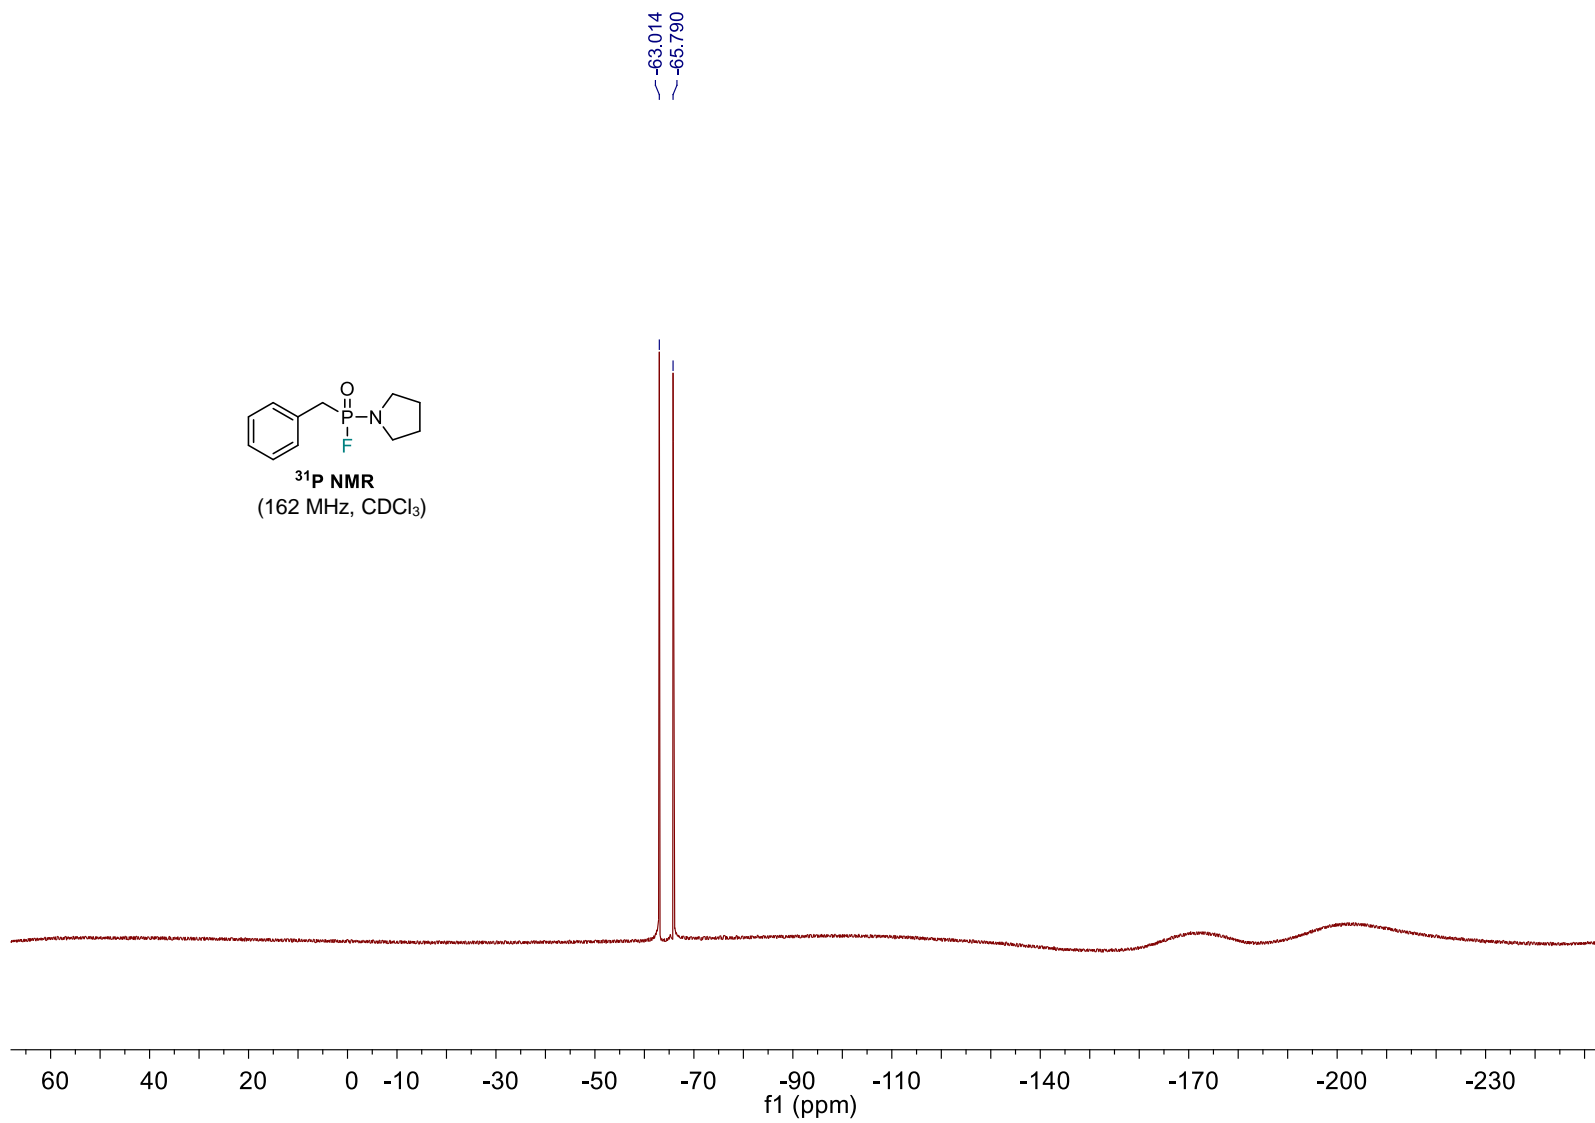

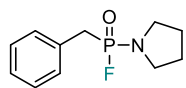

<sup>19</sup>F NMR  
(376 MHz, CDCl<sub>3</sub>)

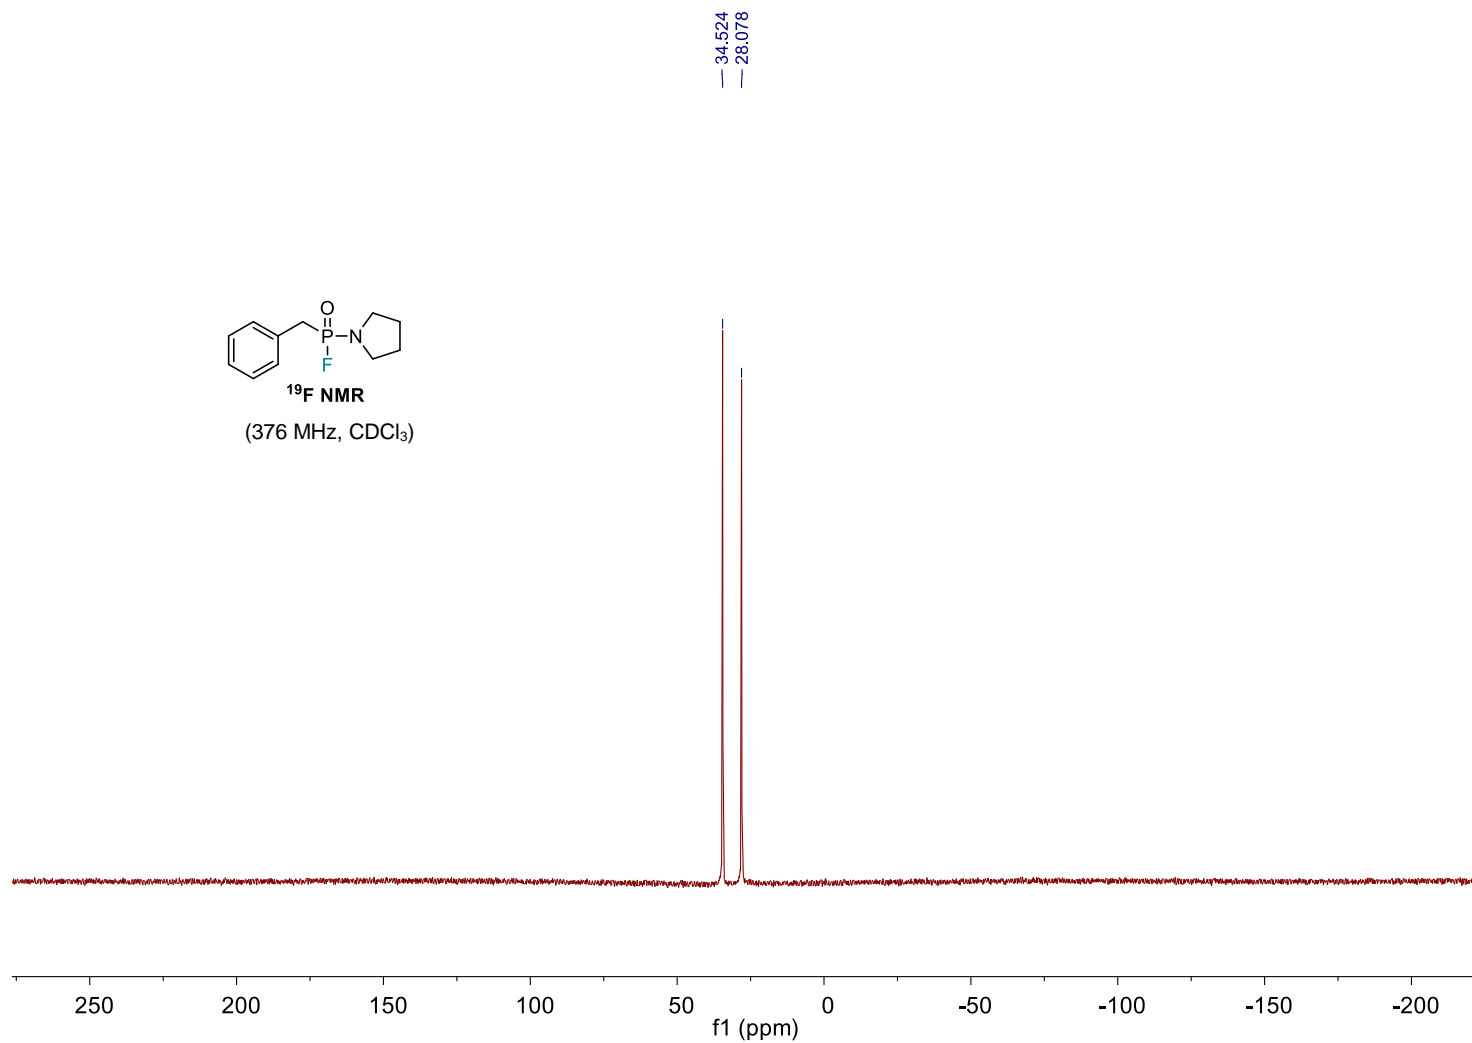

S368



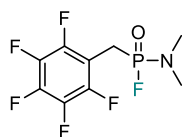

<sup>1</sup>H NMR  
(400 MHz, CDCl<sub>3</sub>)

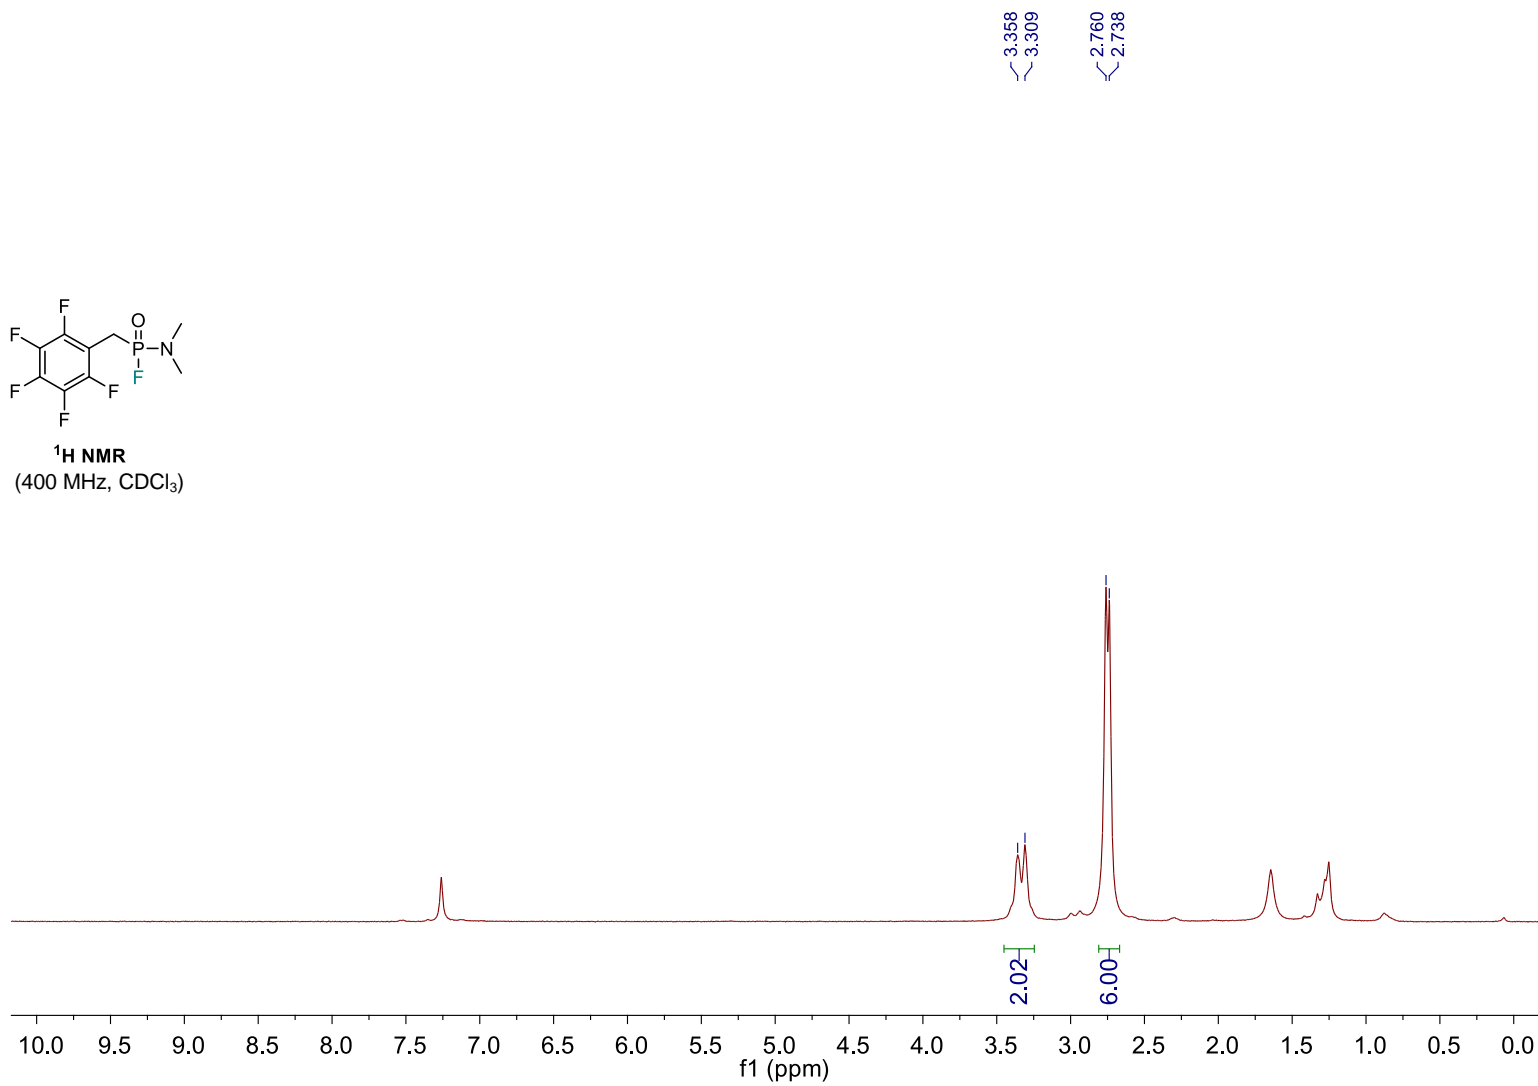

— 179.849

— 146.217  
— 143.717  
— 141.458  
— 138.678

— 106.865  
— 106.721

— 62.554  
— 62.489

— 21.612  
— 20.194  
— 16.133  
— 16.073

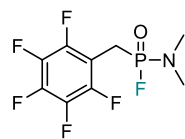

**<sup>13</sup>C NMR**  
(100 MHz, CDCl<sub>3</sub>)

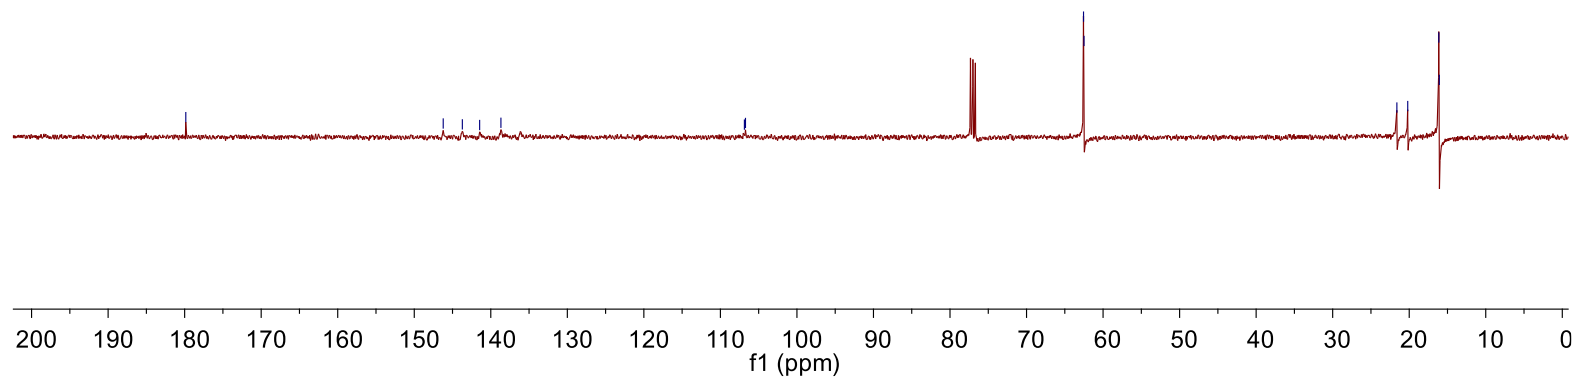

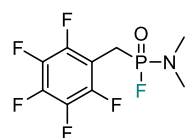

**<sup>31</sup>P NMR**  
(162 MHz, CDCl<sub>3</sub>)

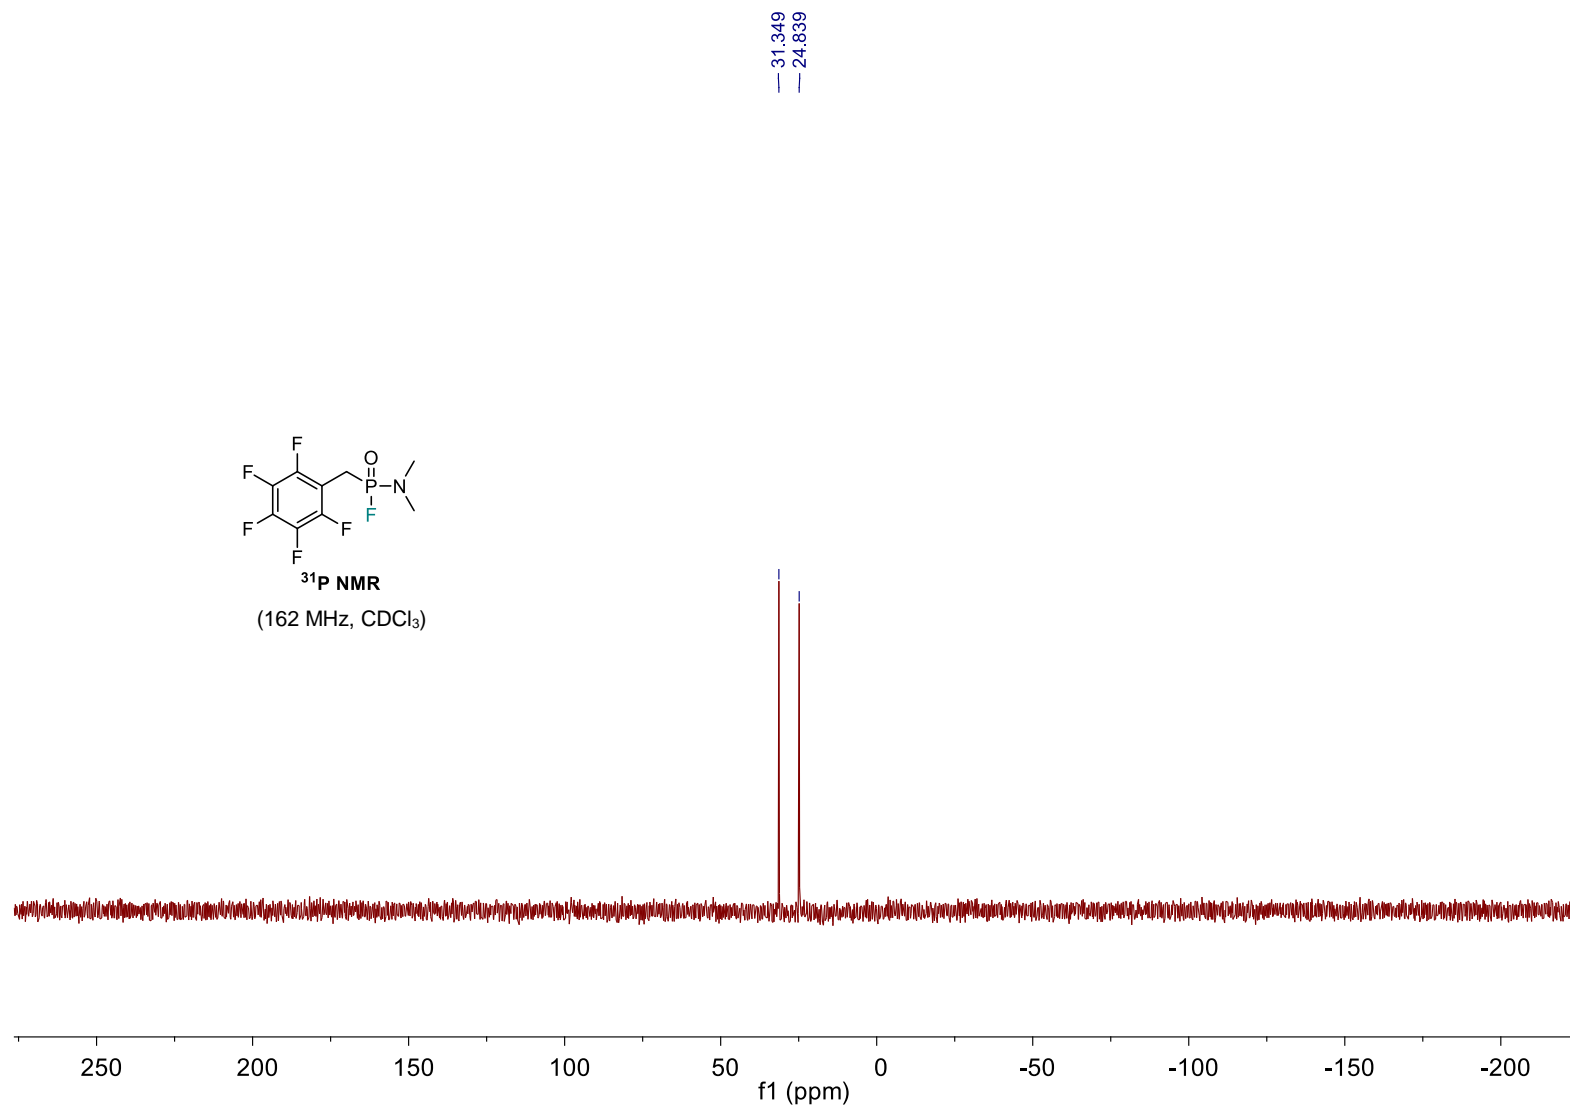

S371

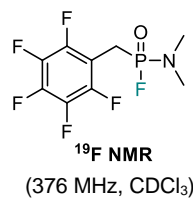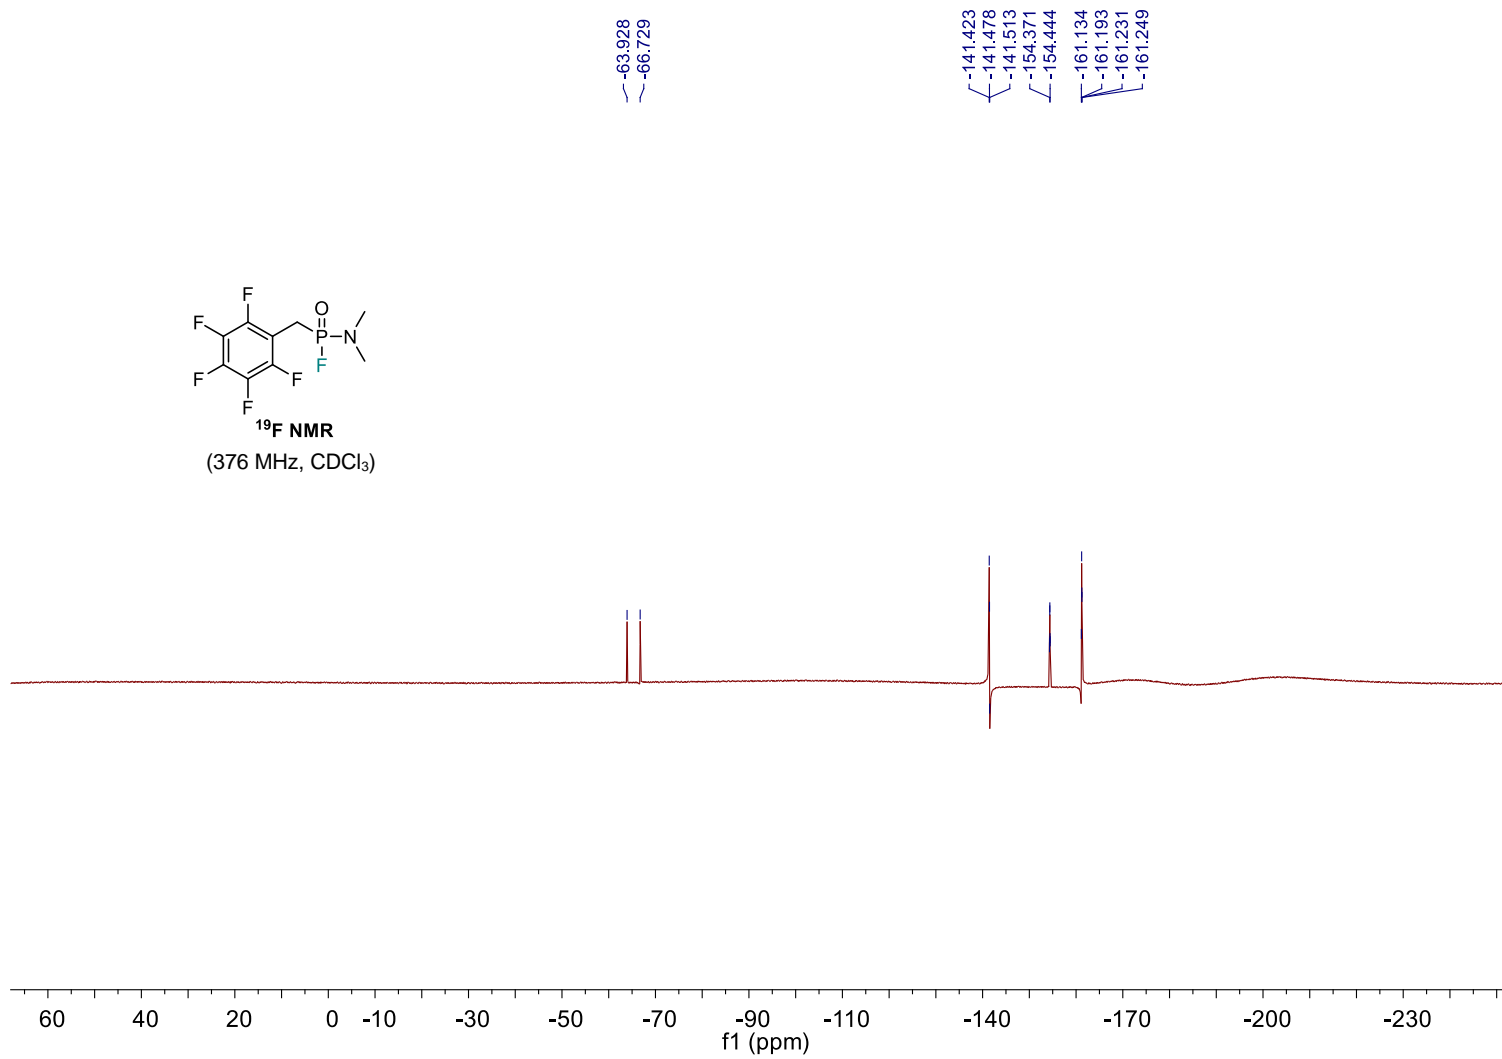

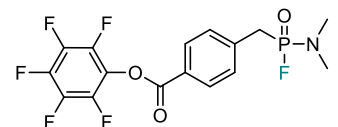

<sup>1</sup>H NMR  
(400 MHz, CDCl<sub>3</sub>)

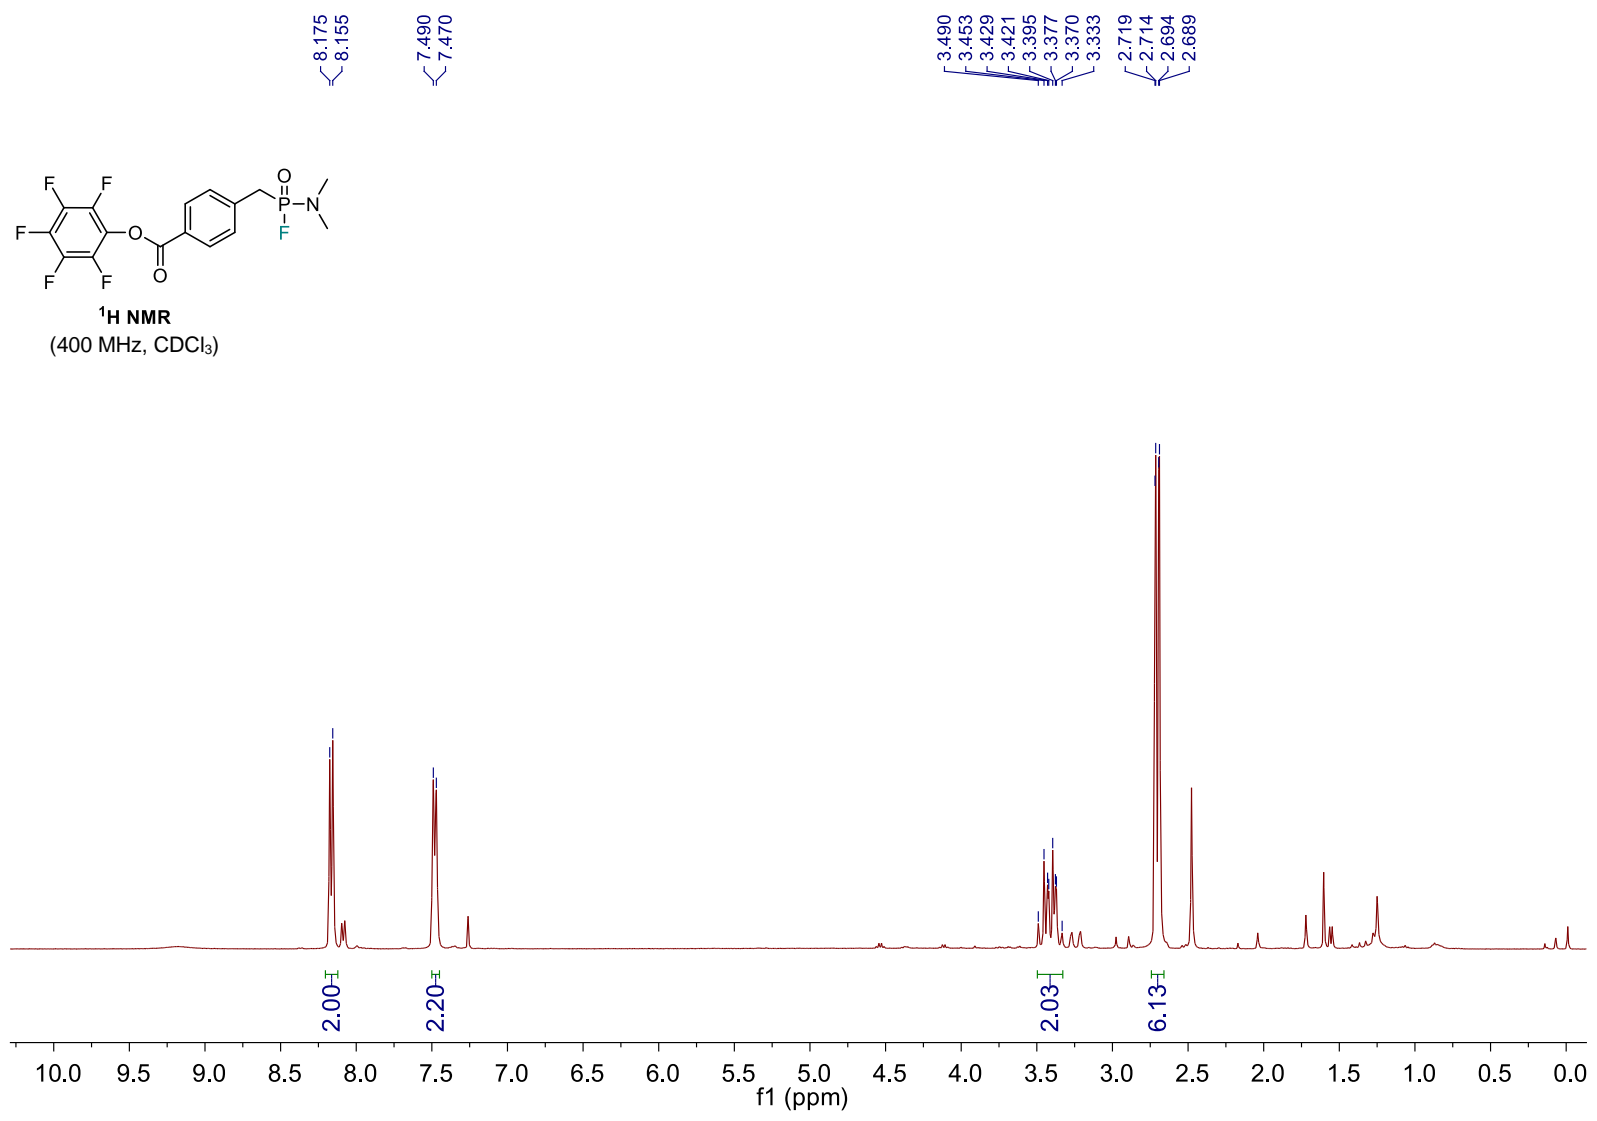

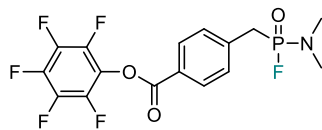

<sup>13</sup>C NMR  
(100 MHz, CDCl<sub>3</sub>)

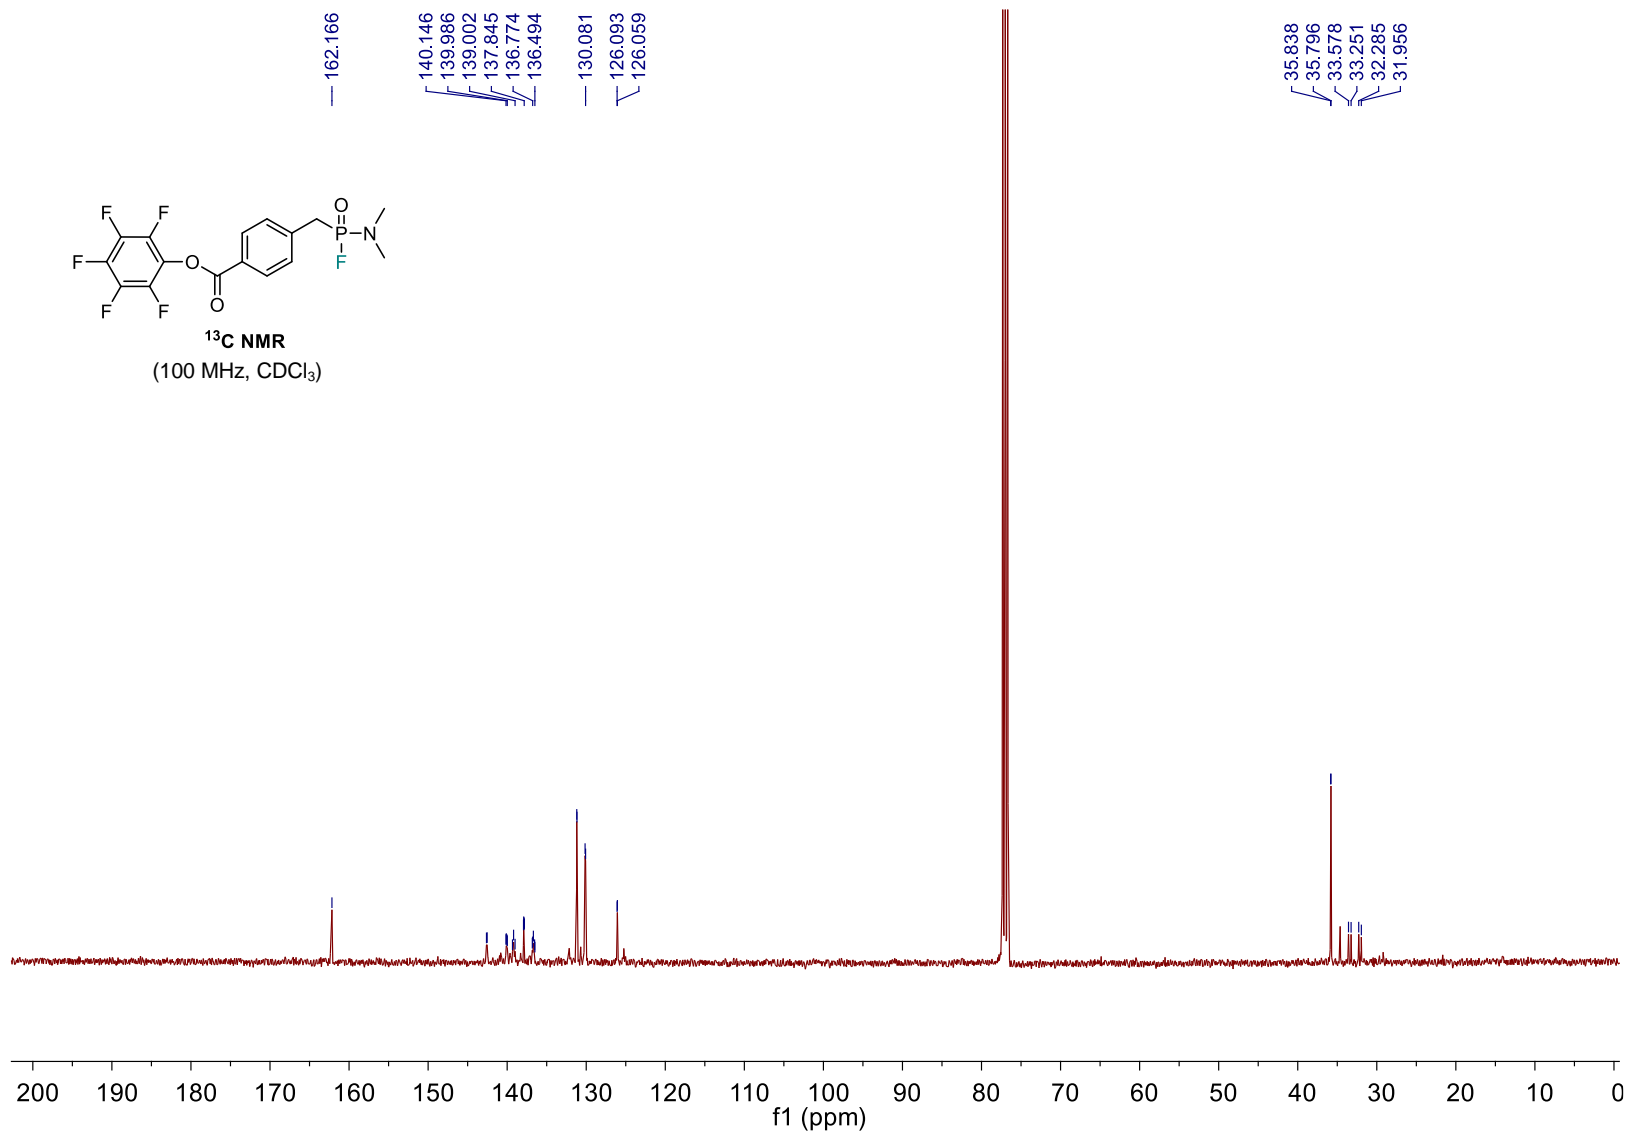

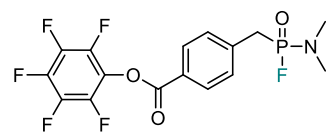

<sup>31</sup>P NMR  
(162 MHz, CDCl<sub>3</sub>)

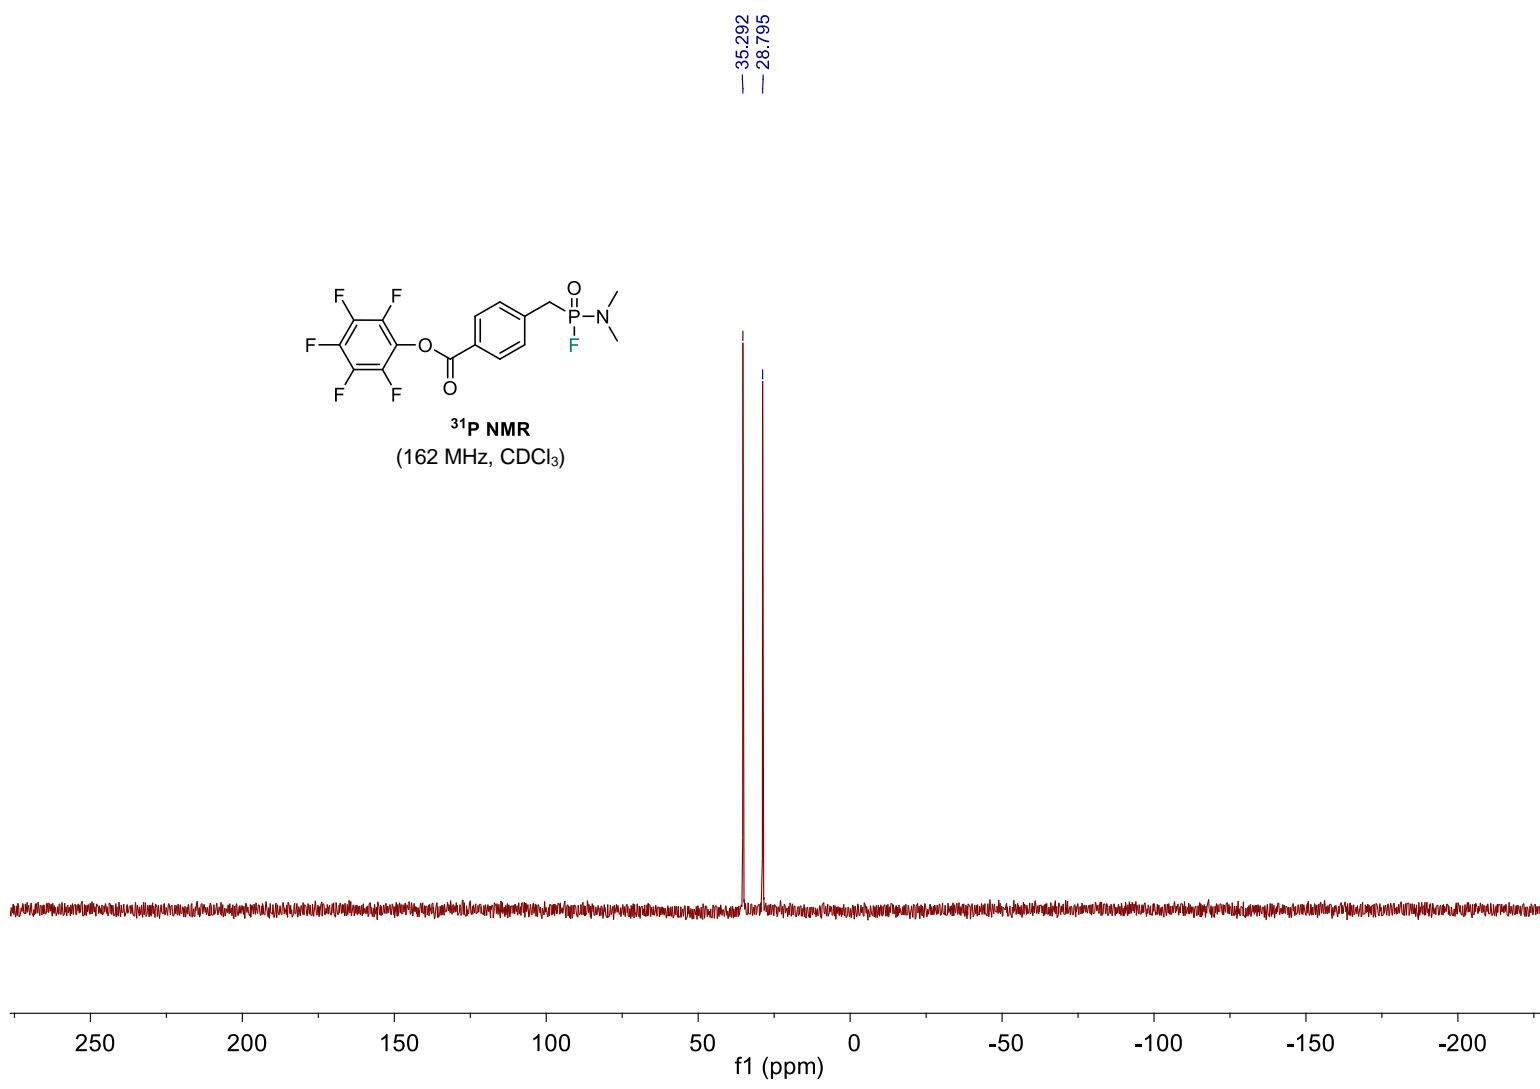

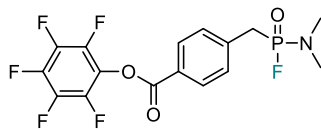

<sup>19</sup>F NMR  
(376 MHz, CDCl<sub>3</sub>)

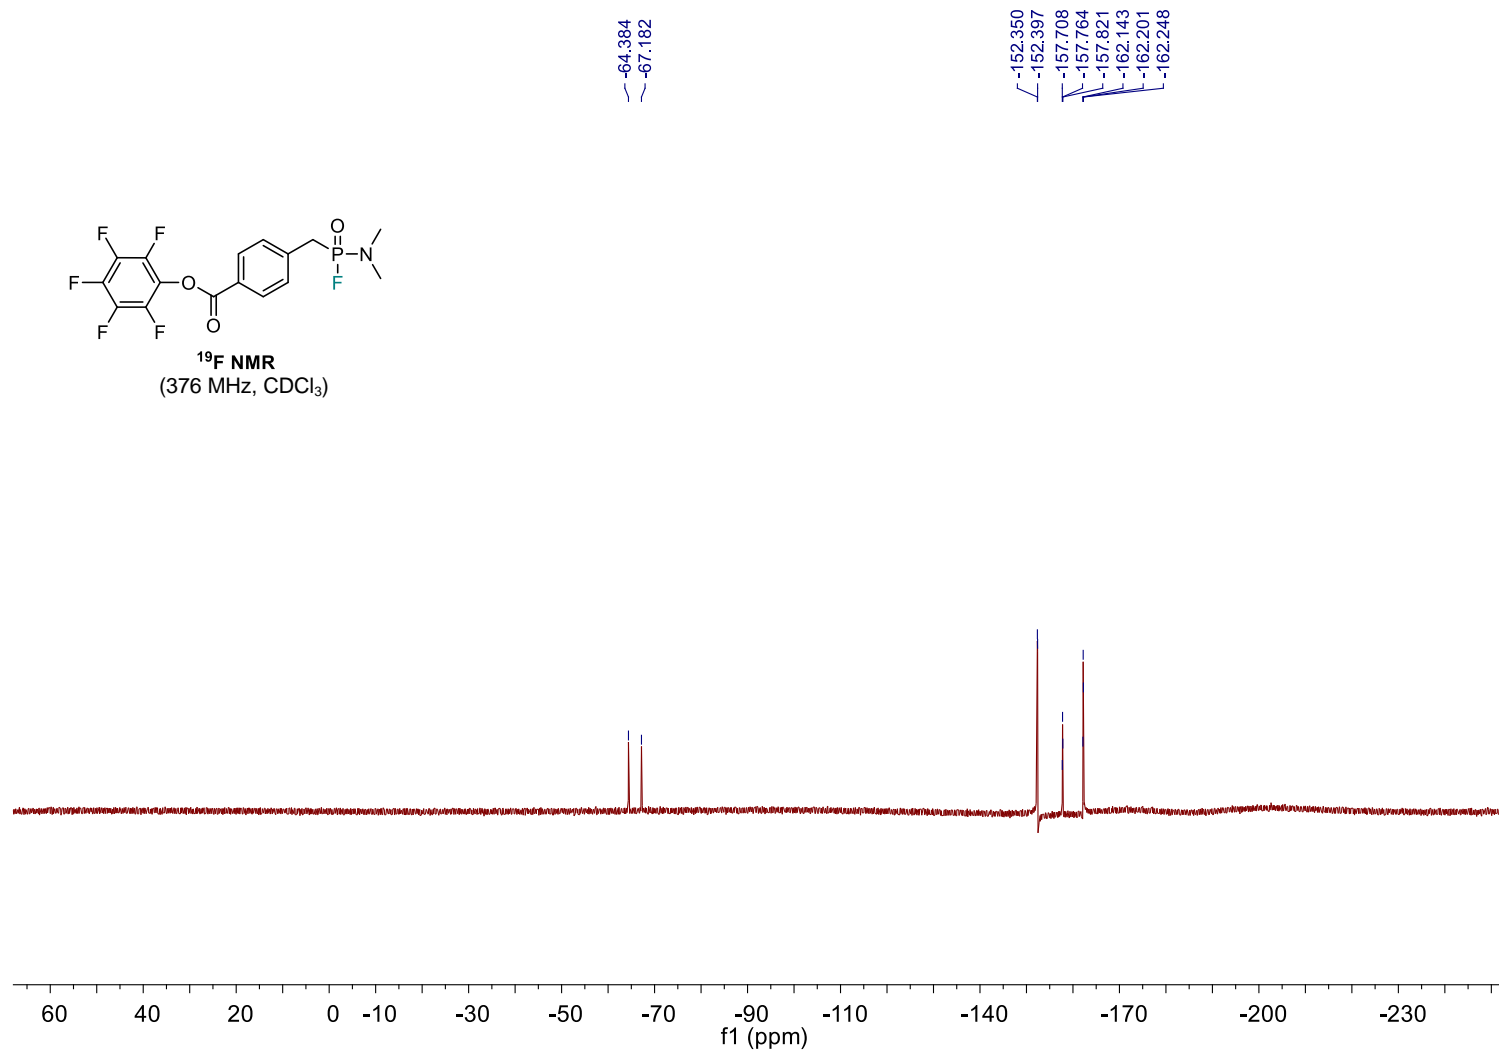



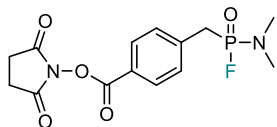

<sup>1</sup>H NMR  
(400 MHz, CDCl<sub>3</sub>)

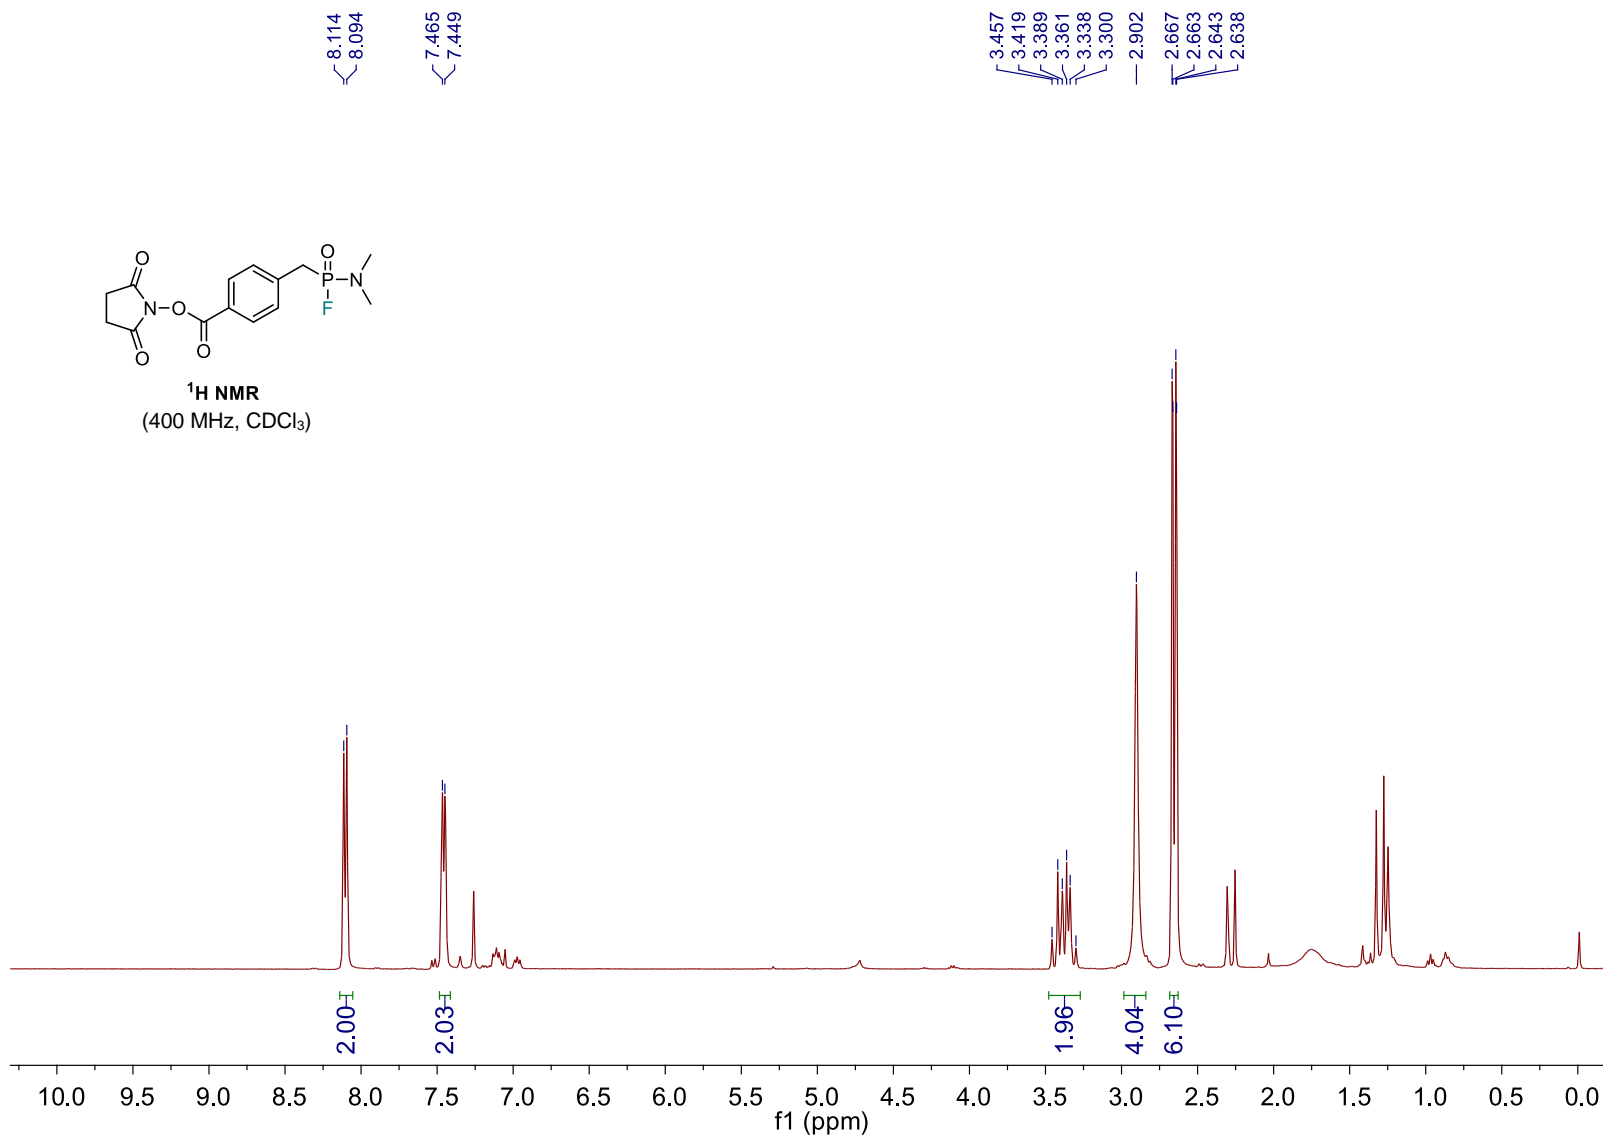

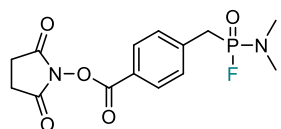

**<sup>13</sup>C NMR**  
(100 MHz, CDCl<sub>3</sub>)

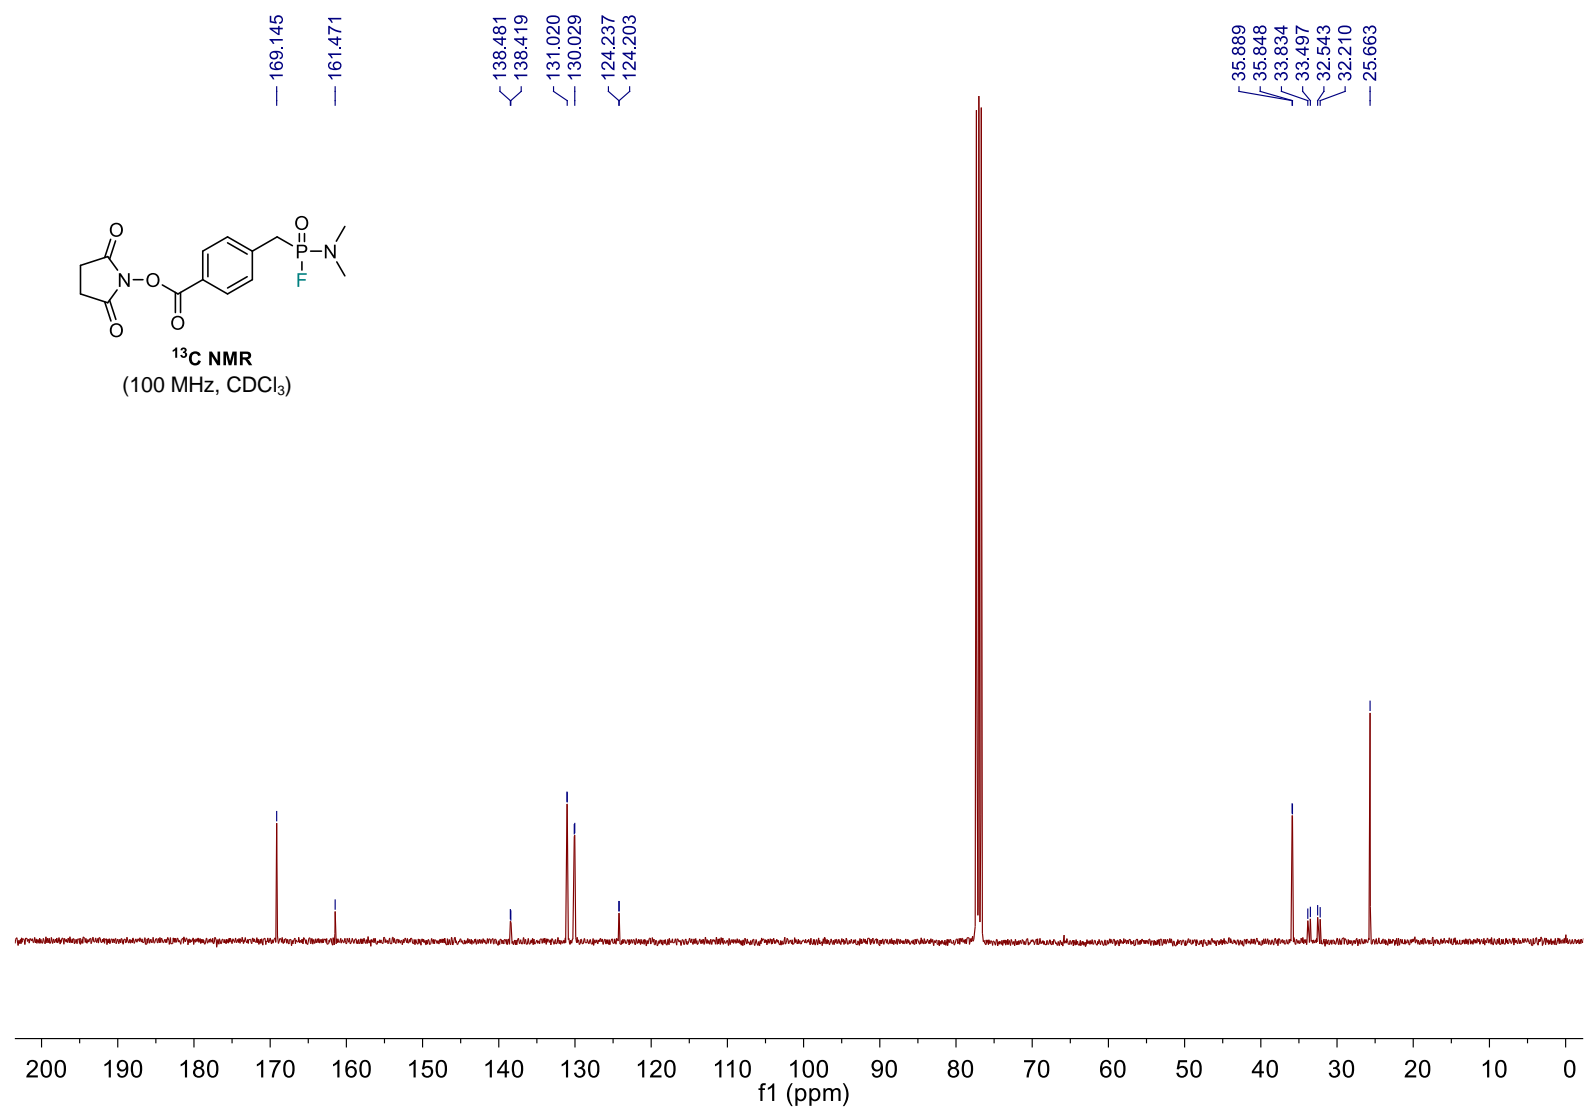

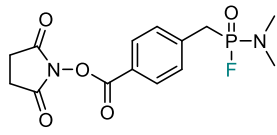

**<sup>31</sup>P NMR**  
(162 MHz, CDCl<sub>3</sub>)

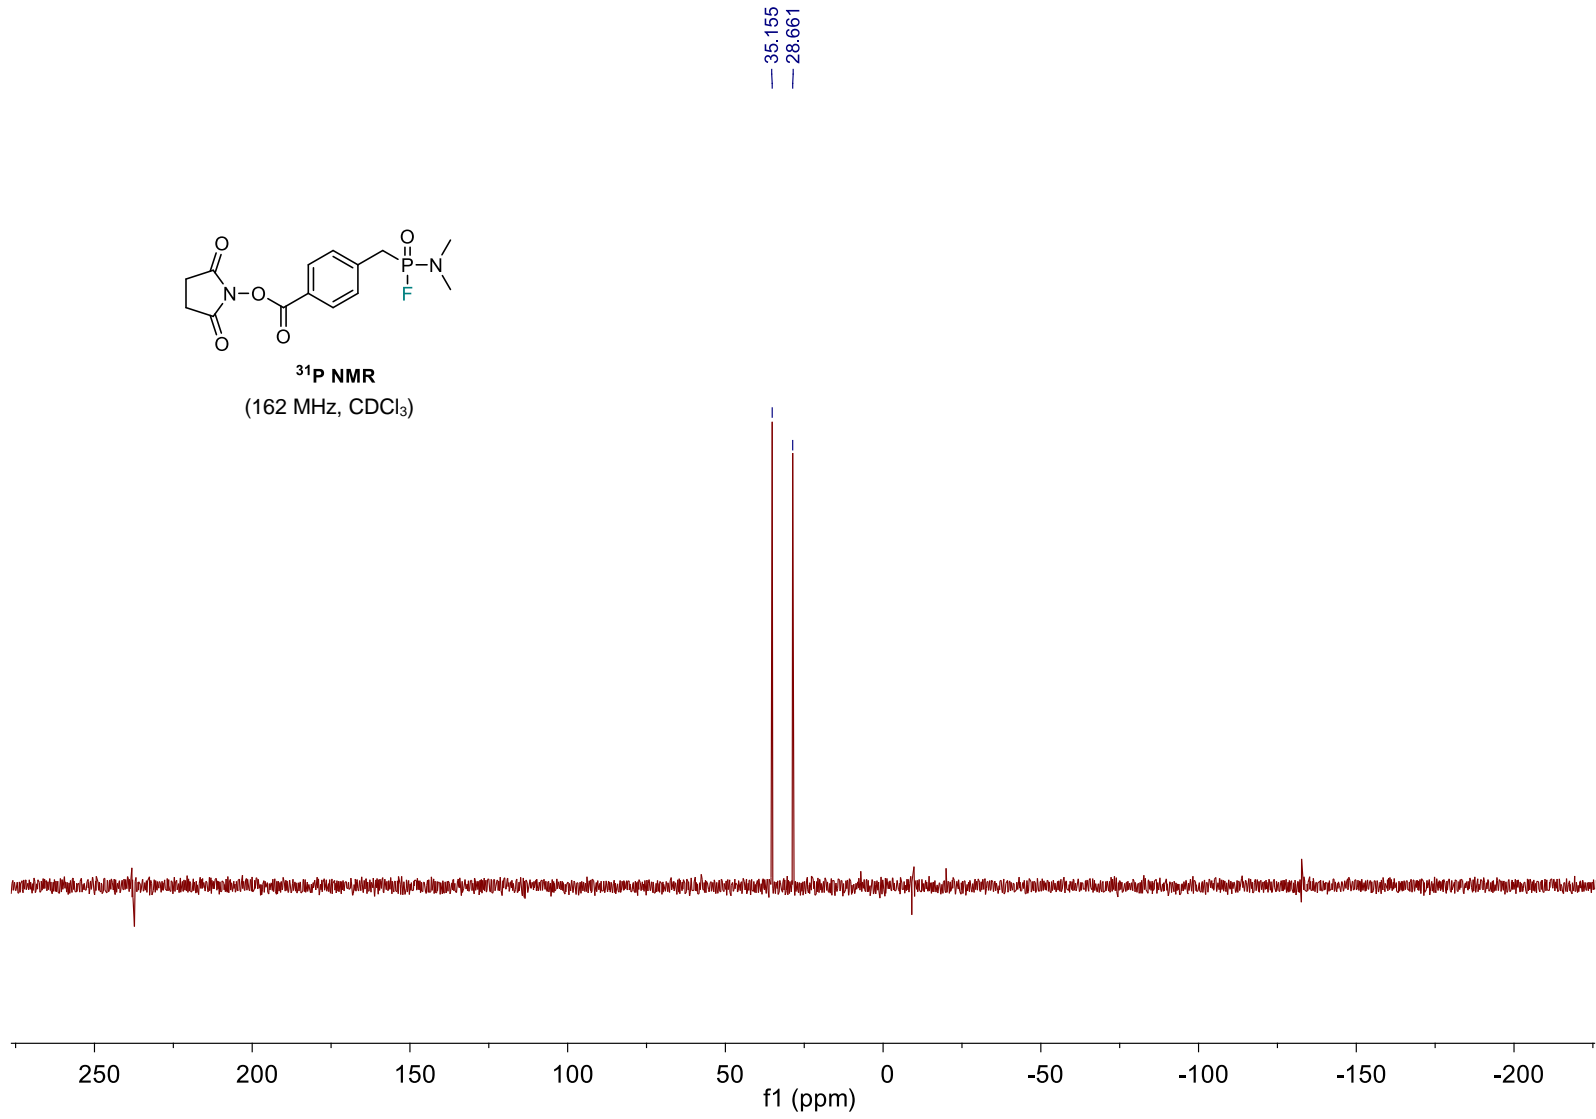

S379

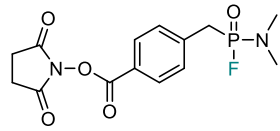

**<sup>19</sup>F NMR**  
(376 MHz, CDCl<sub>3</sub>)

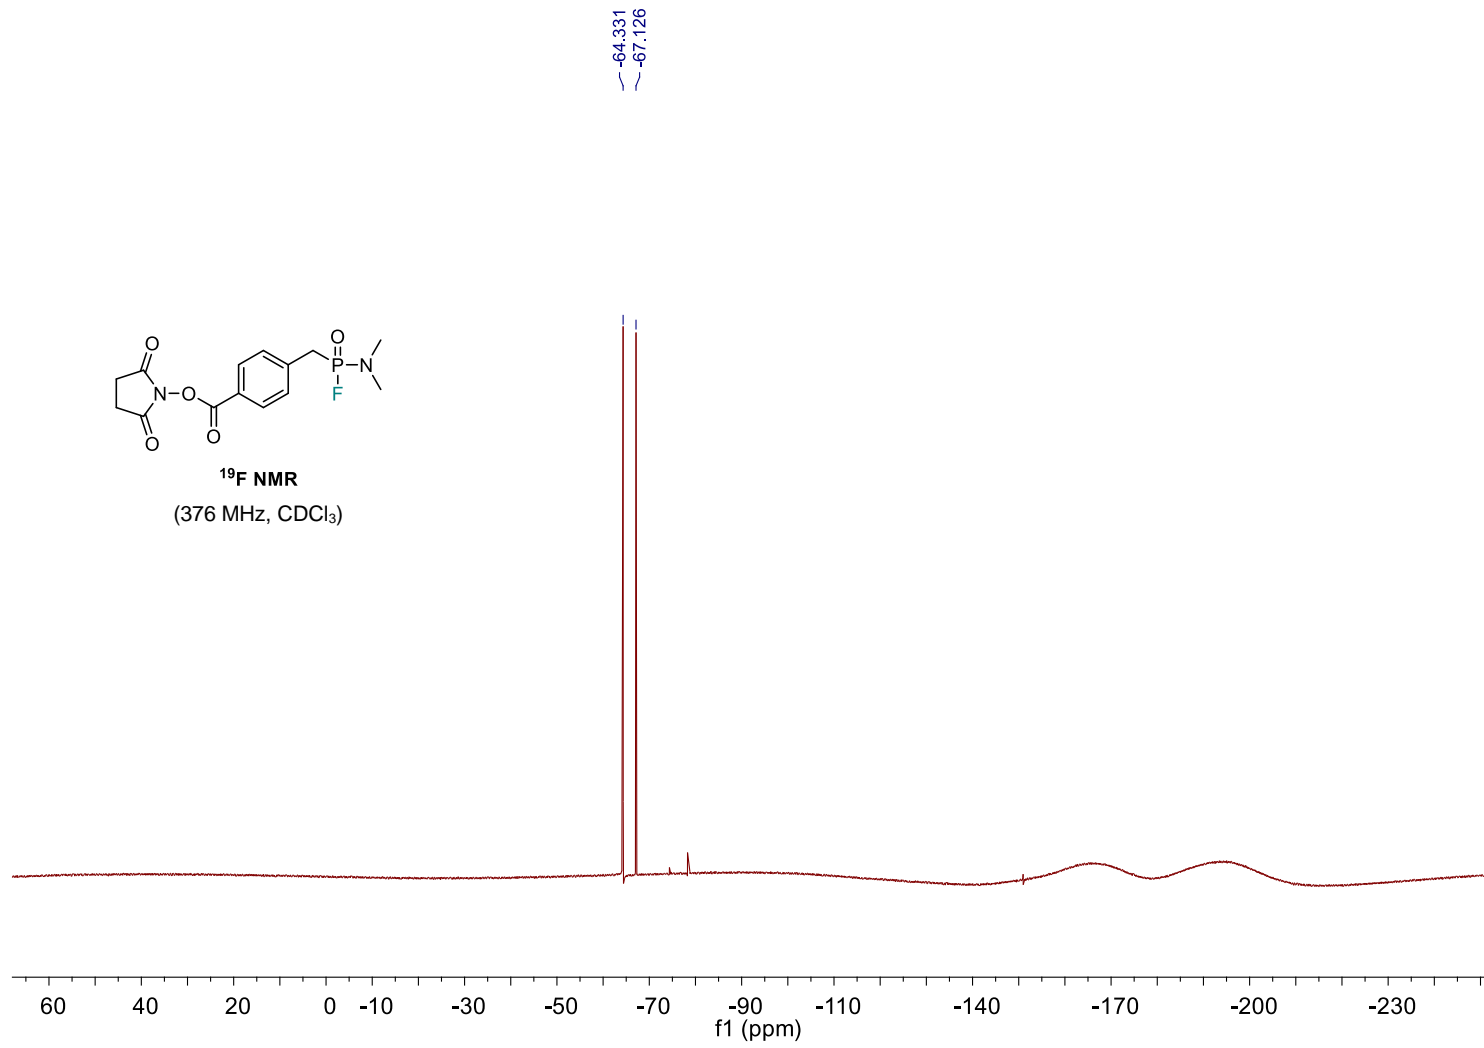

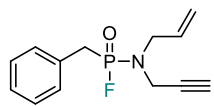

<sup>1</sup>H NMR  
(400 MHz, CDCl<sub>3</sub>)

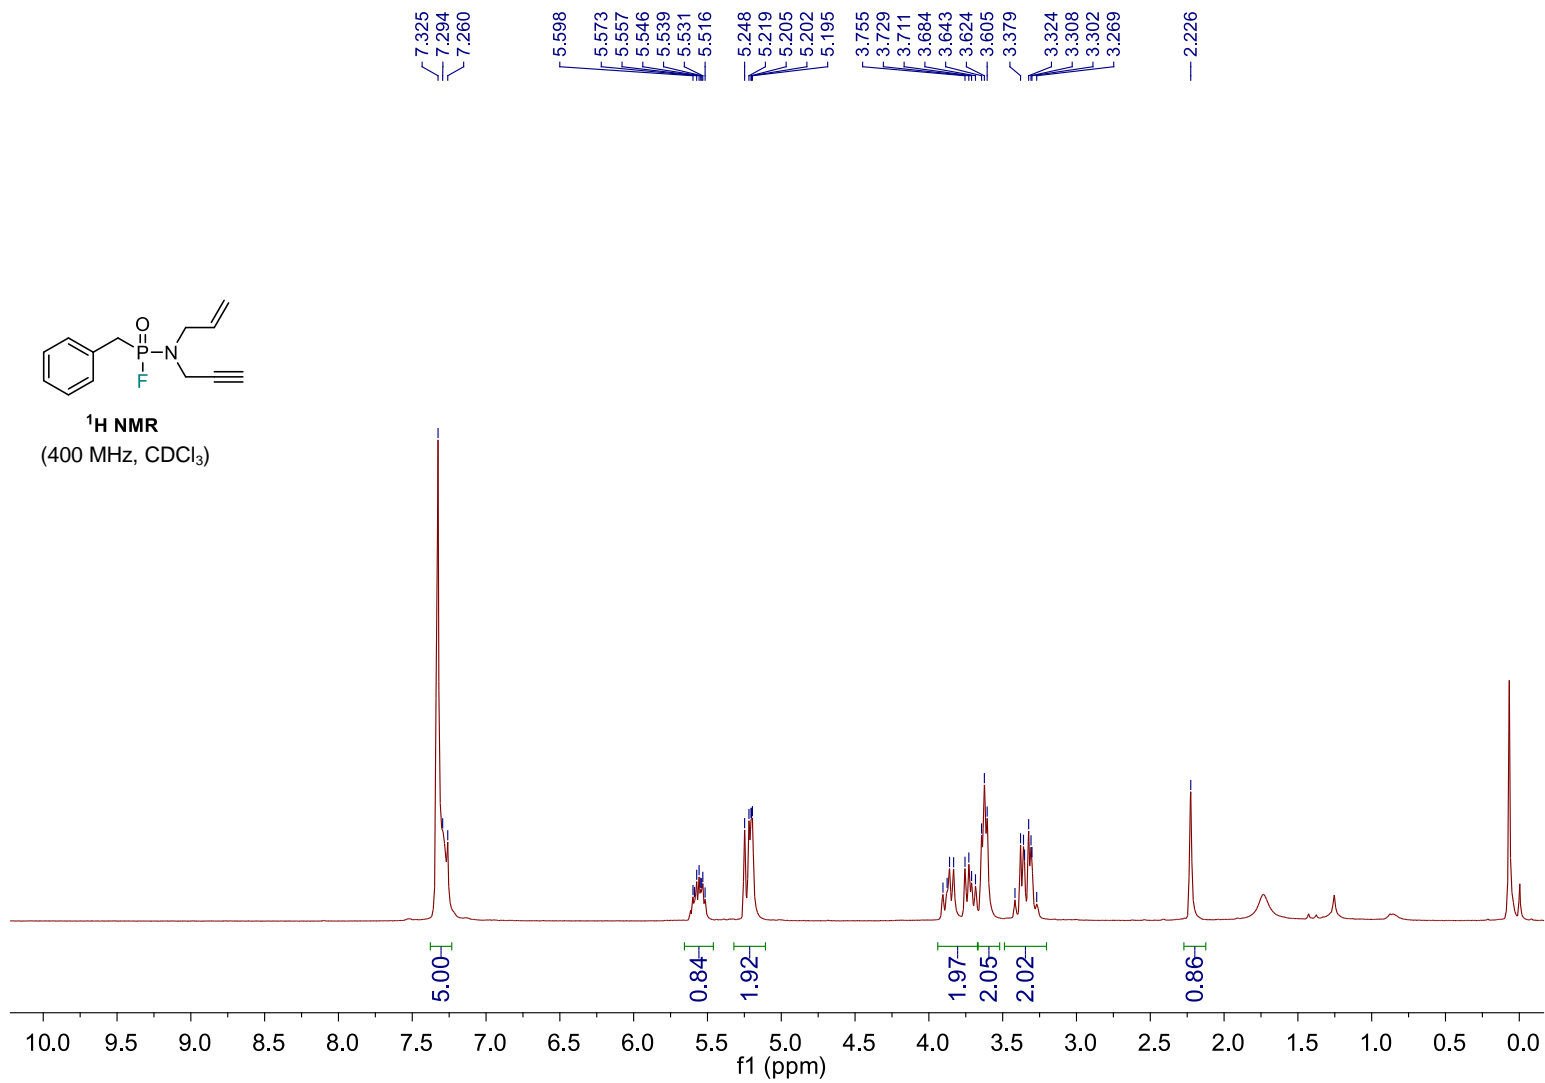

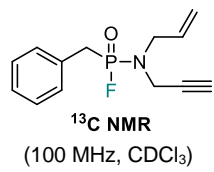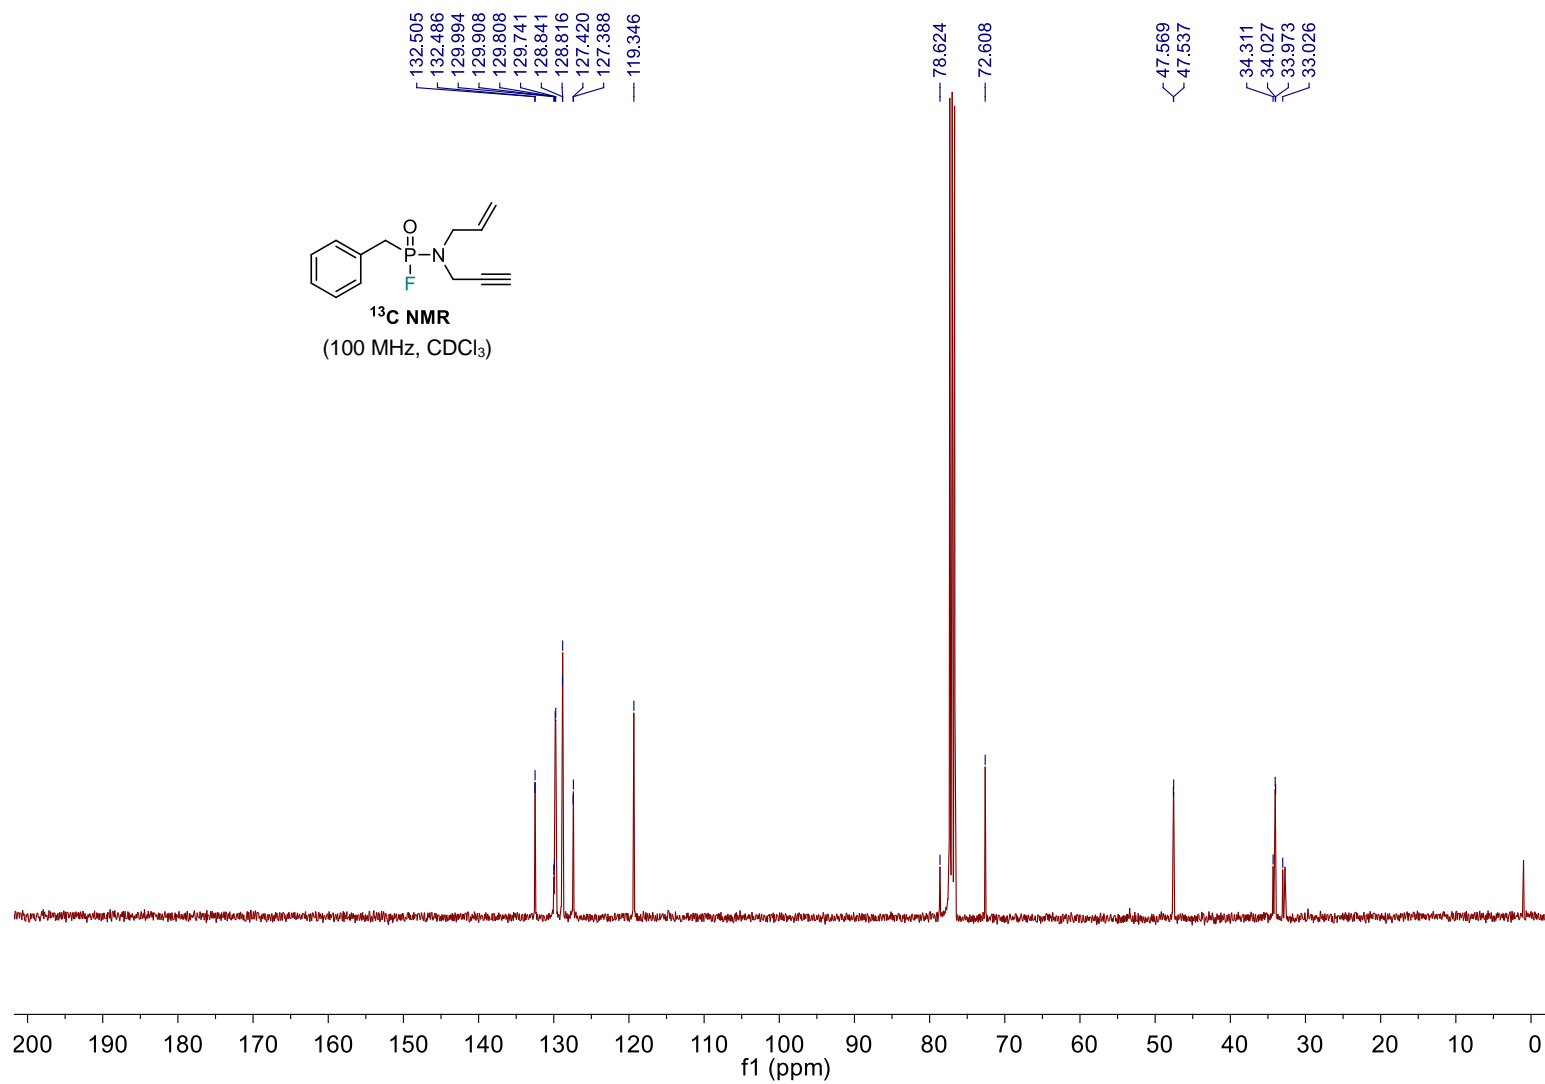

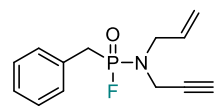

<sup>31</sup>P NMR  
(162 MHz, CDCl<sub>3</sub>)

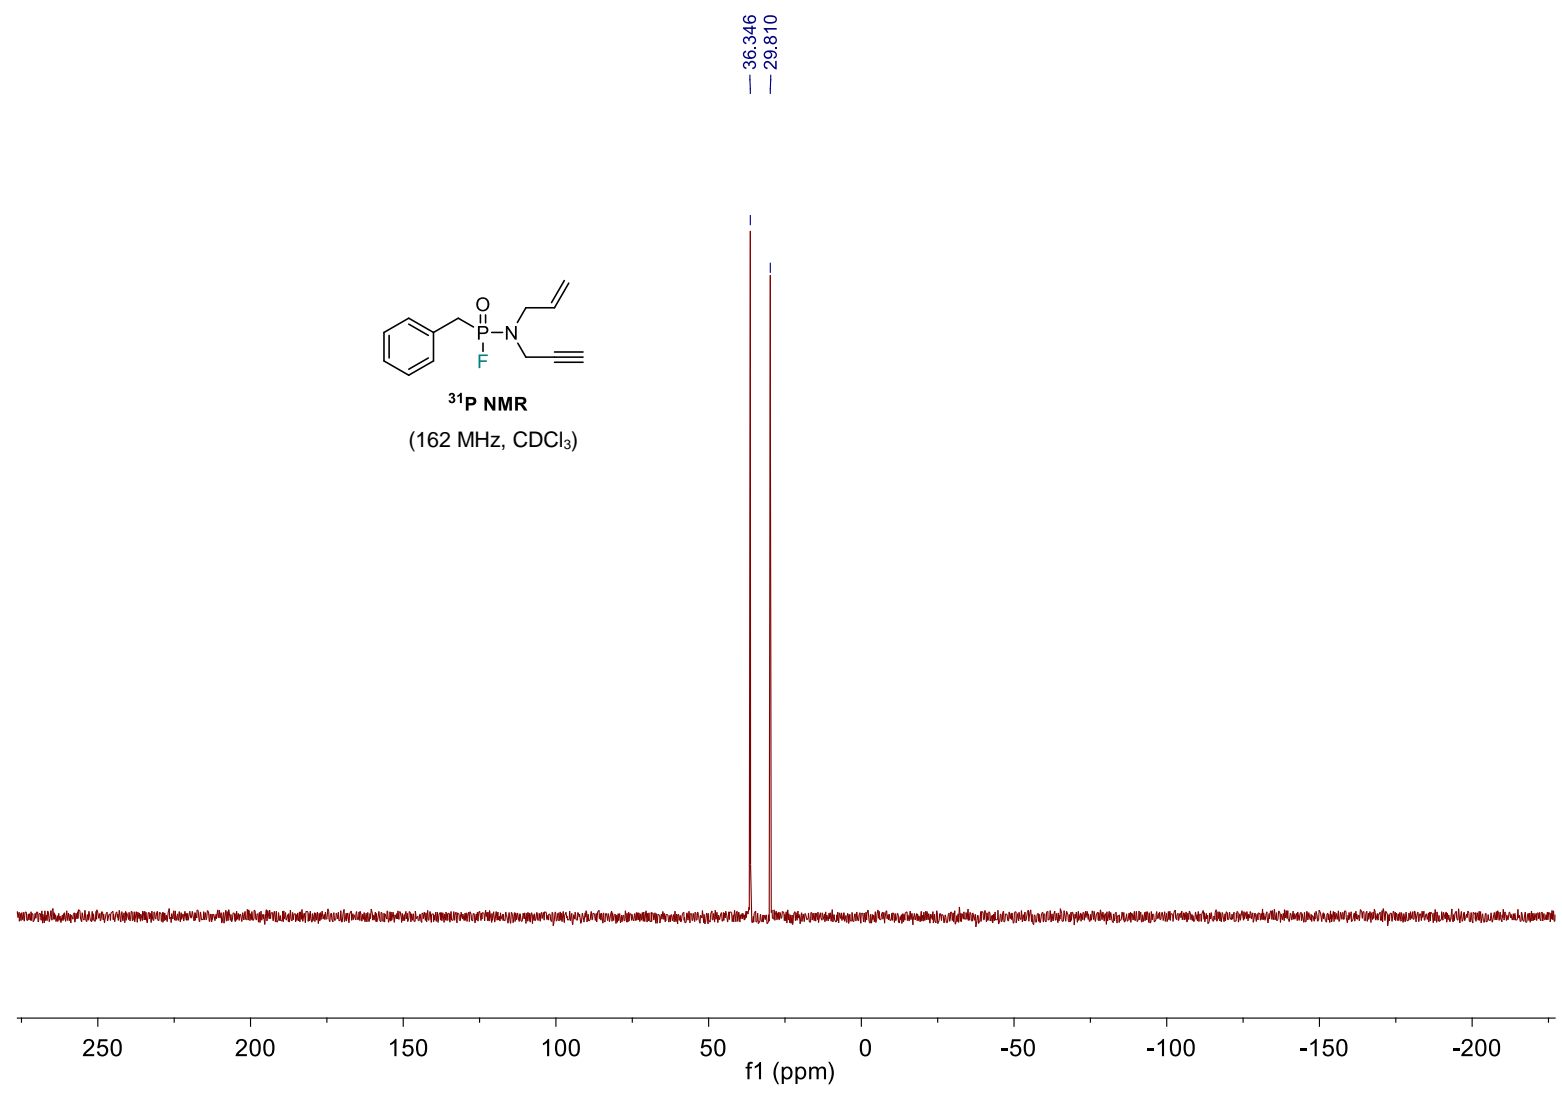

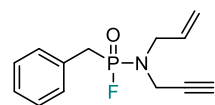

**<sup>19</sup>F NMR**  
(376 MHz, CDCl<sub>3</sub>)

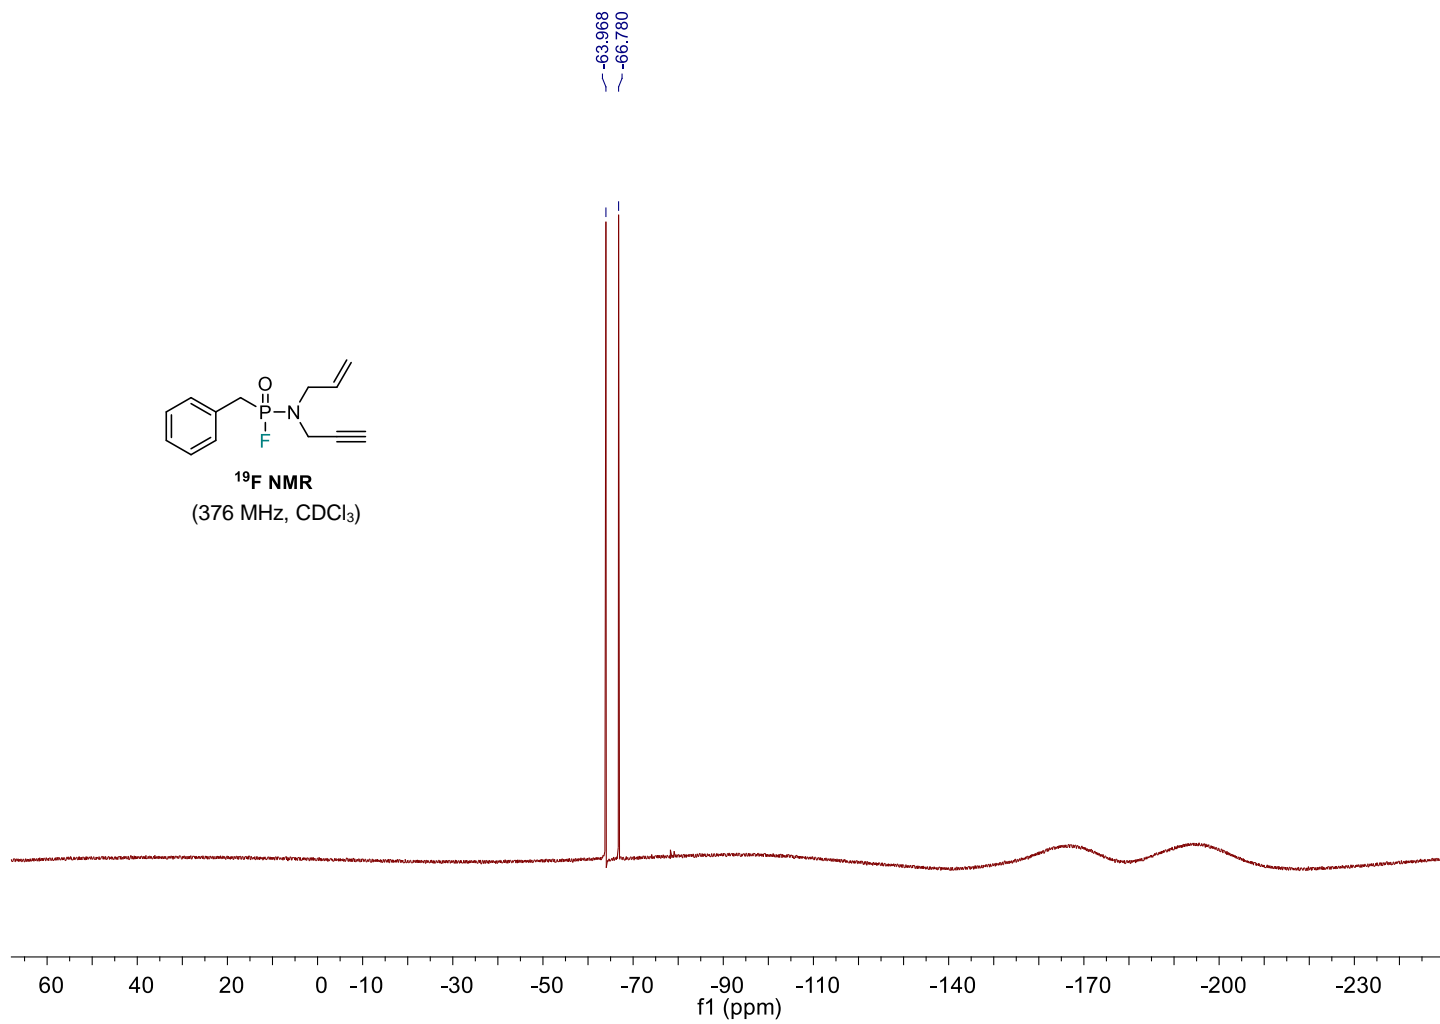



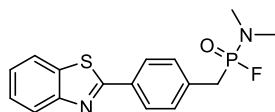

**<sup>1</sup>H NMR**  
(400 MHz, CDCl<sub>3</sub>)

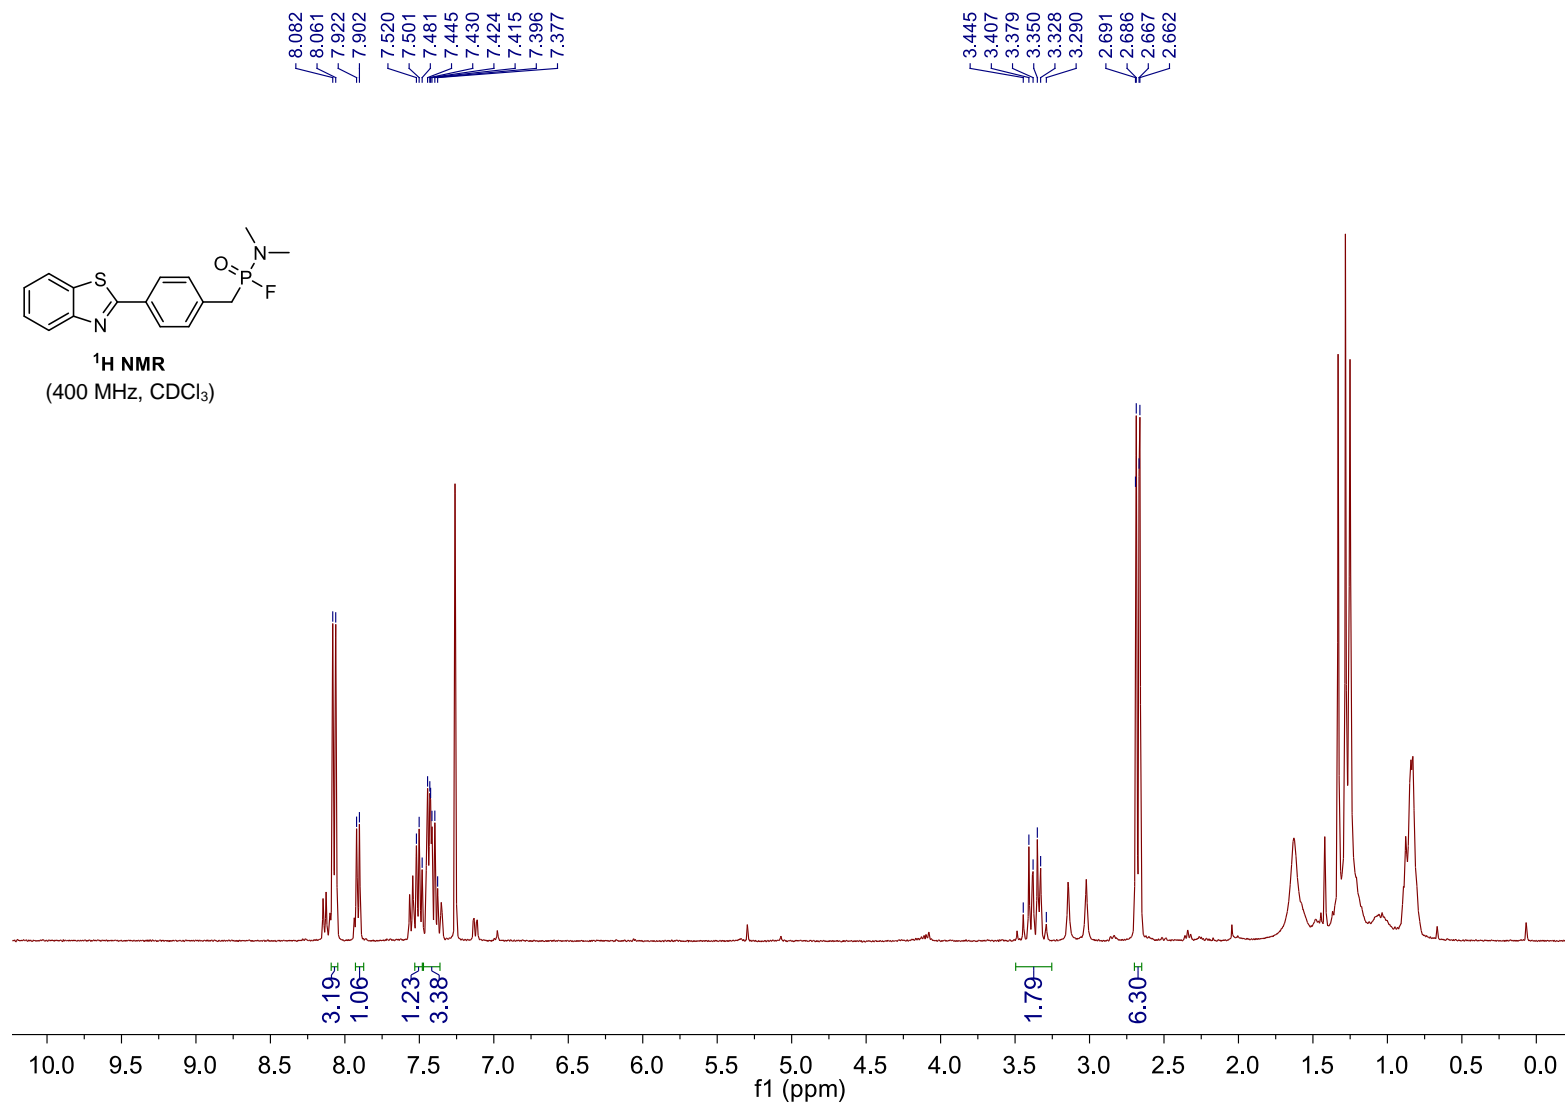

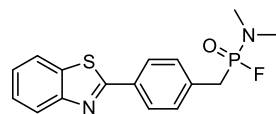

<sup>13</sup>C NMR  
(100 MHz, CDCl<sub>3</sub>)

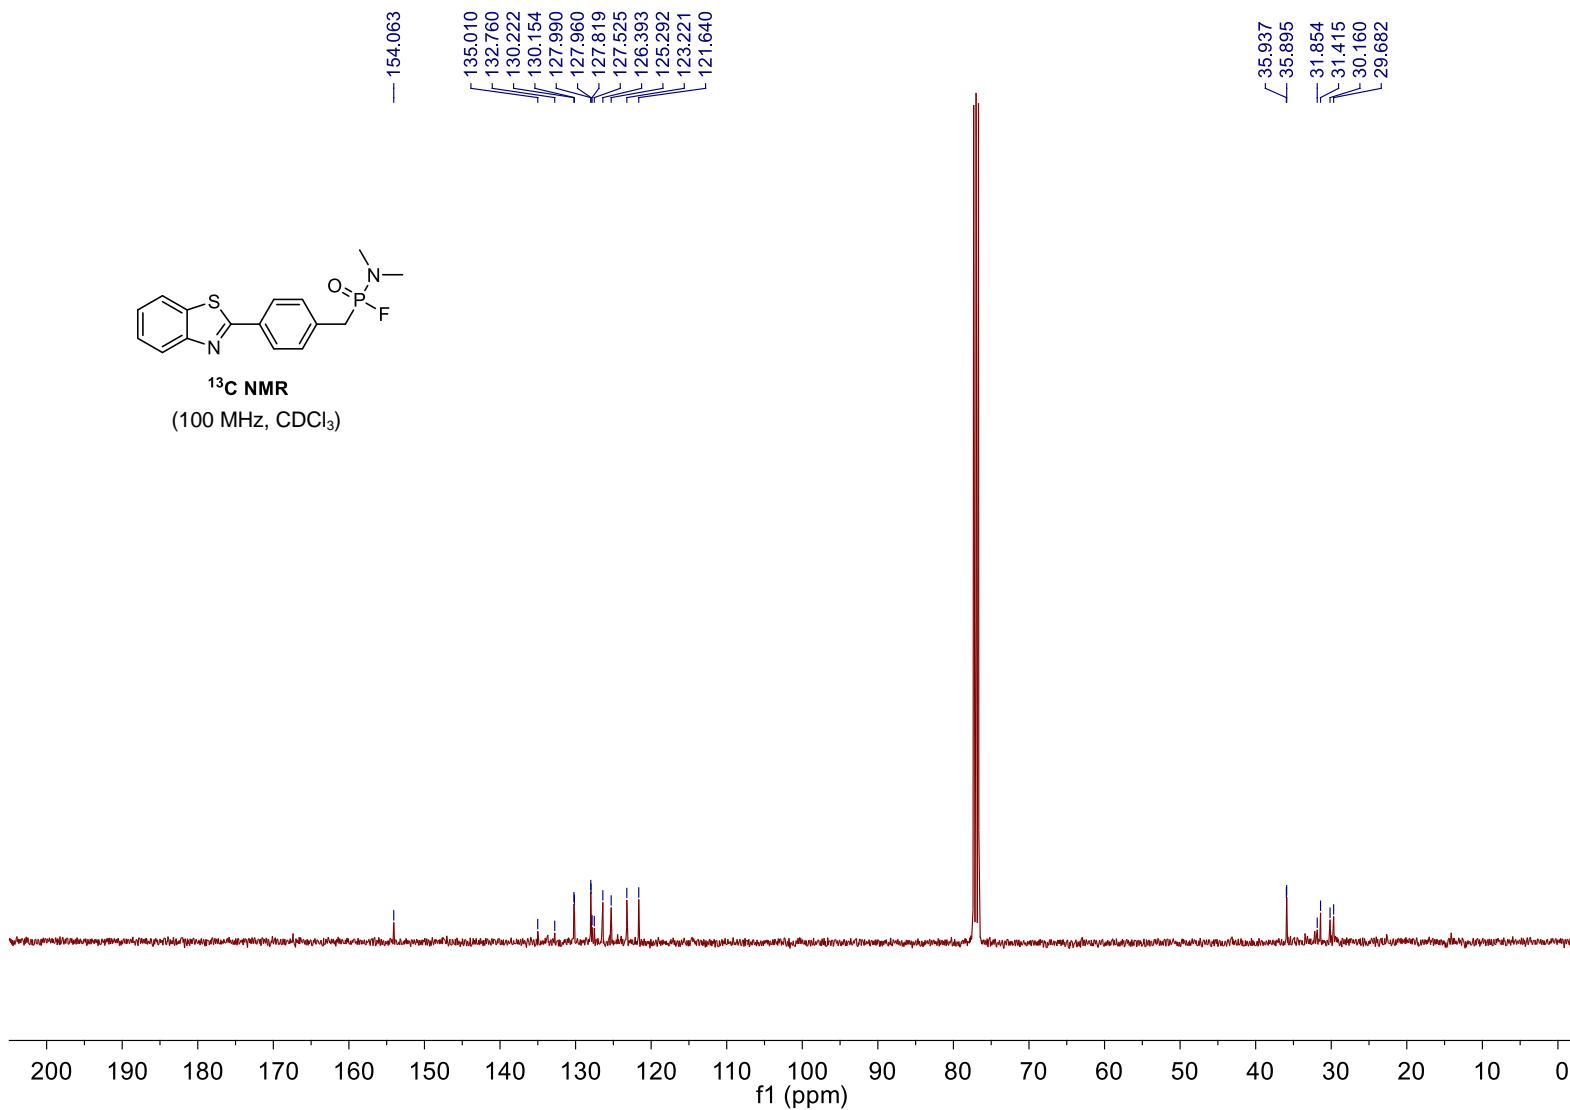

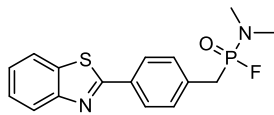

**<sup>31</sup>P NMR**  
(162 MHz, CDCl<sub>3</sub>)

— 36.114  
— 29.619

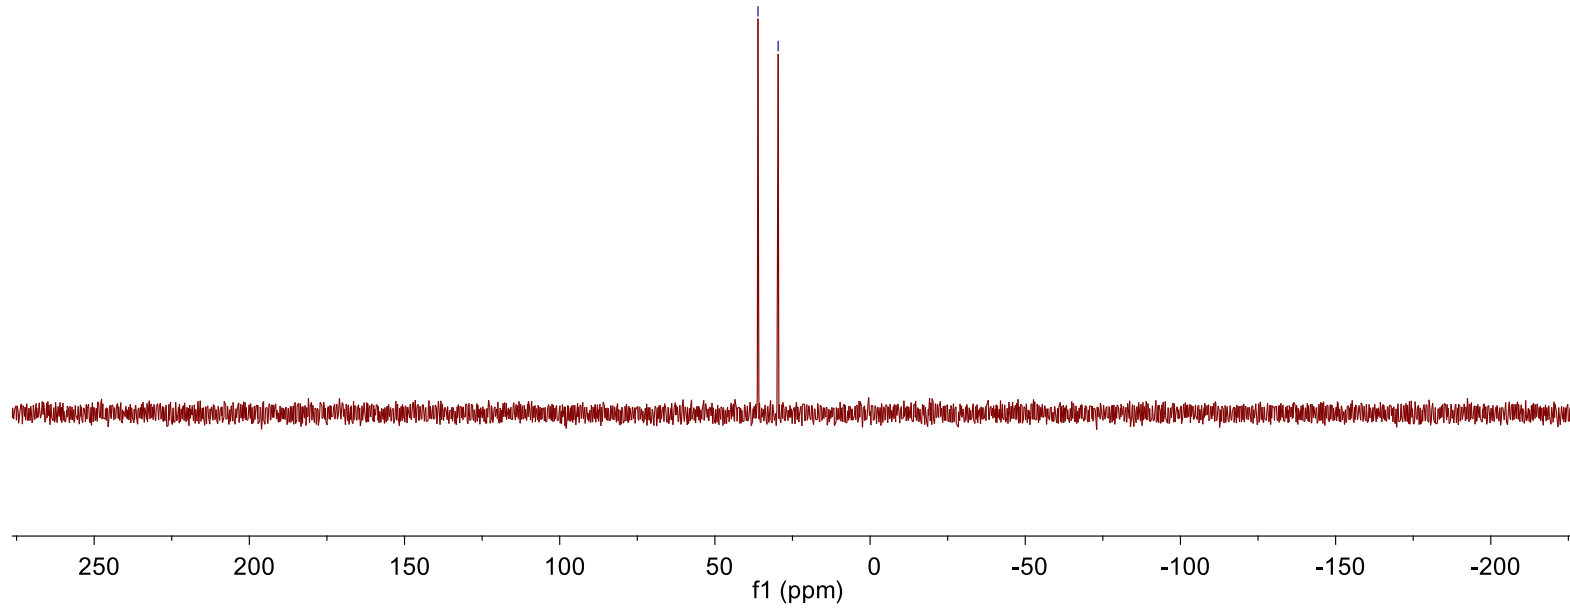

S387

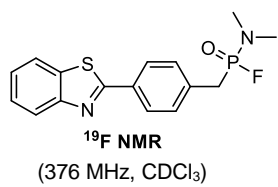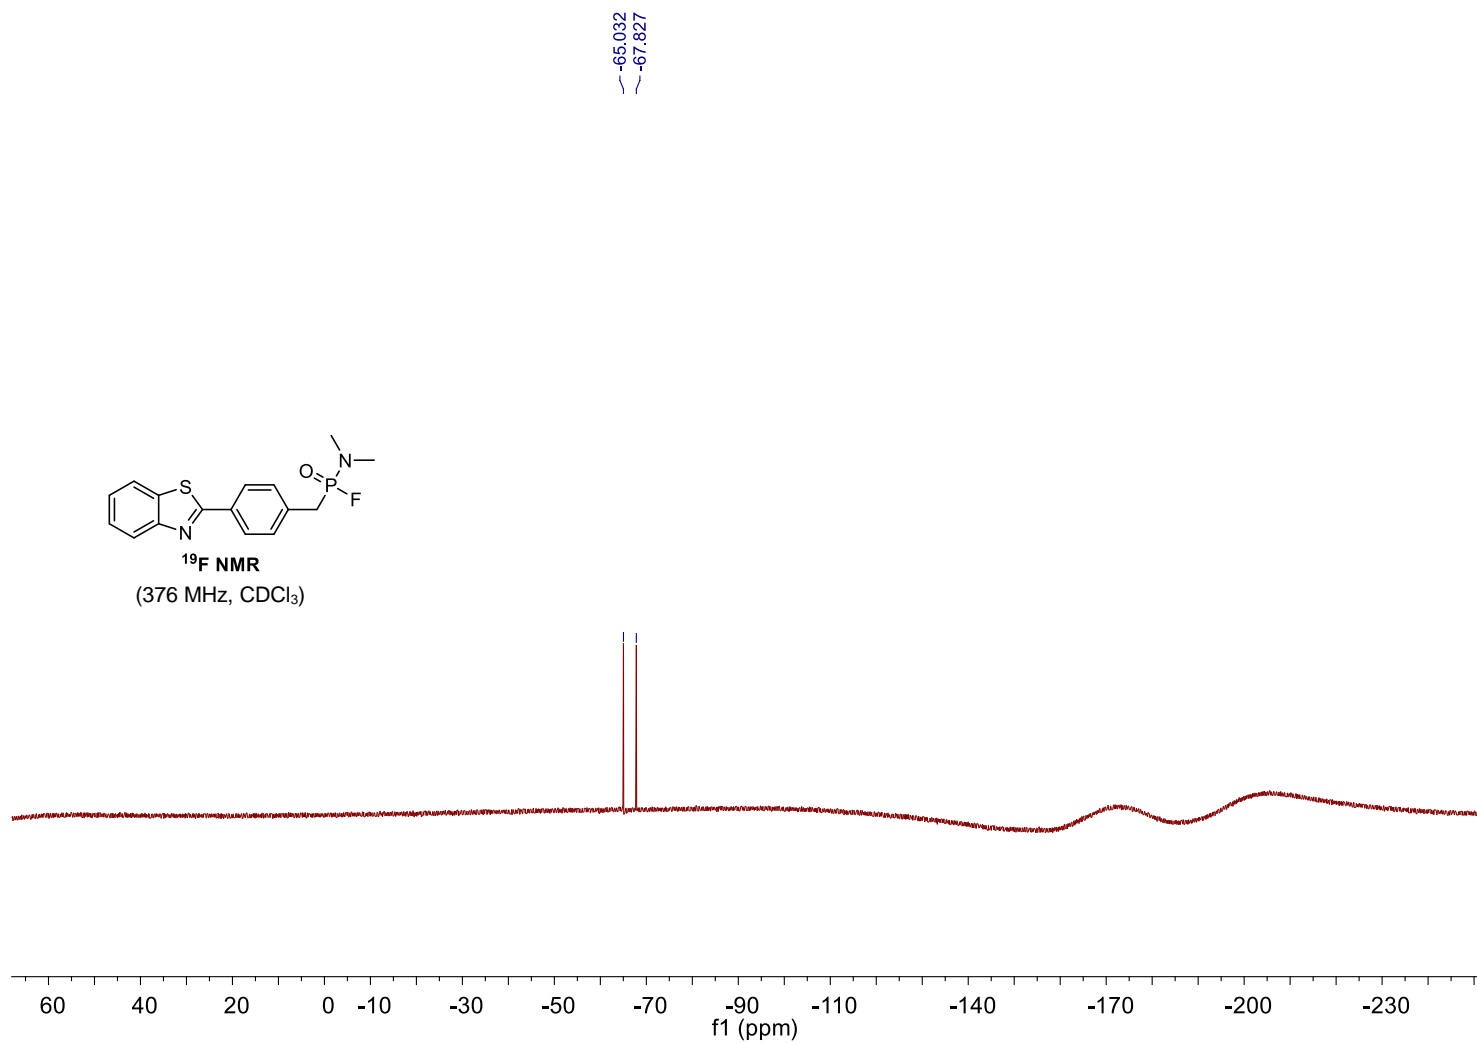

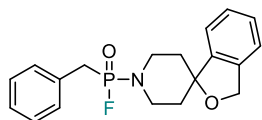

**<sup>1</sup>H NMR**  
(400 MHz, CDCl<sub>3</sub>)

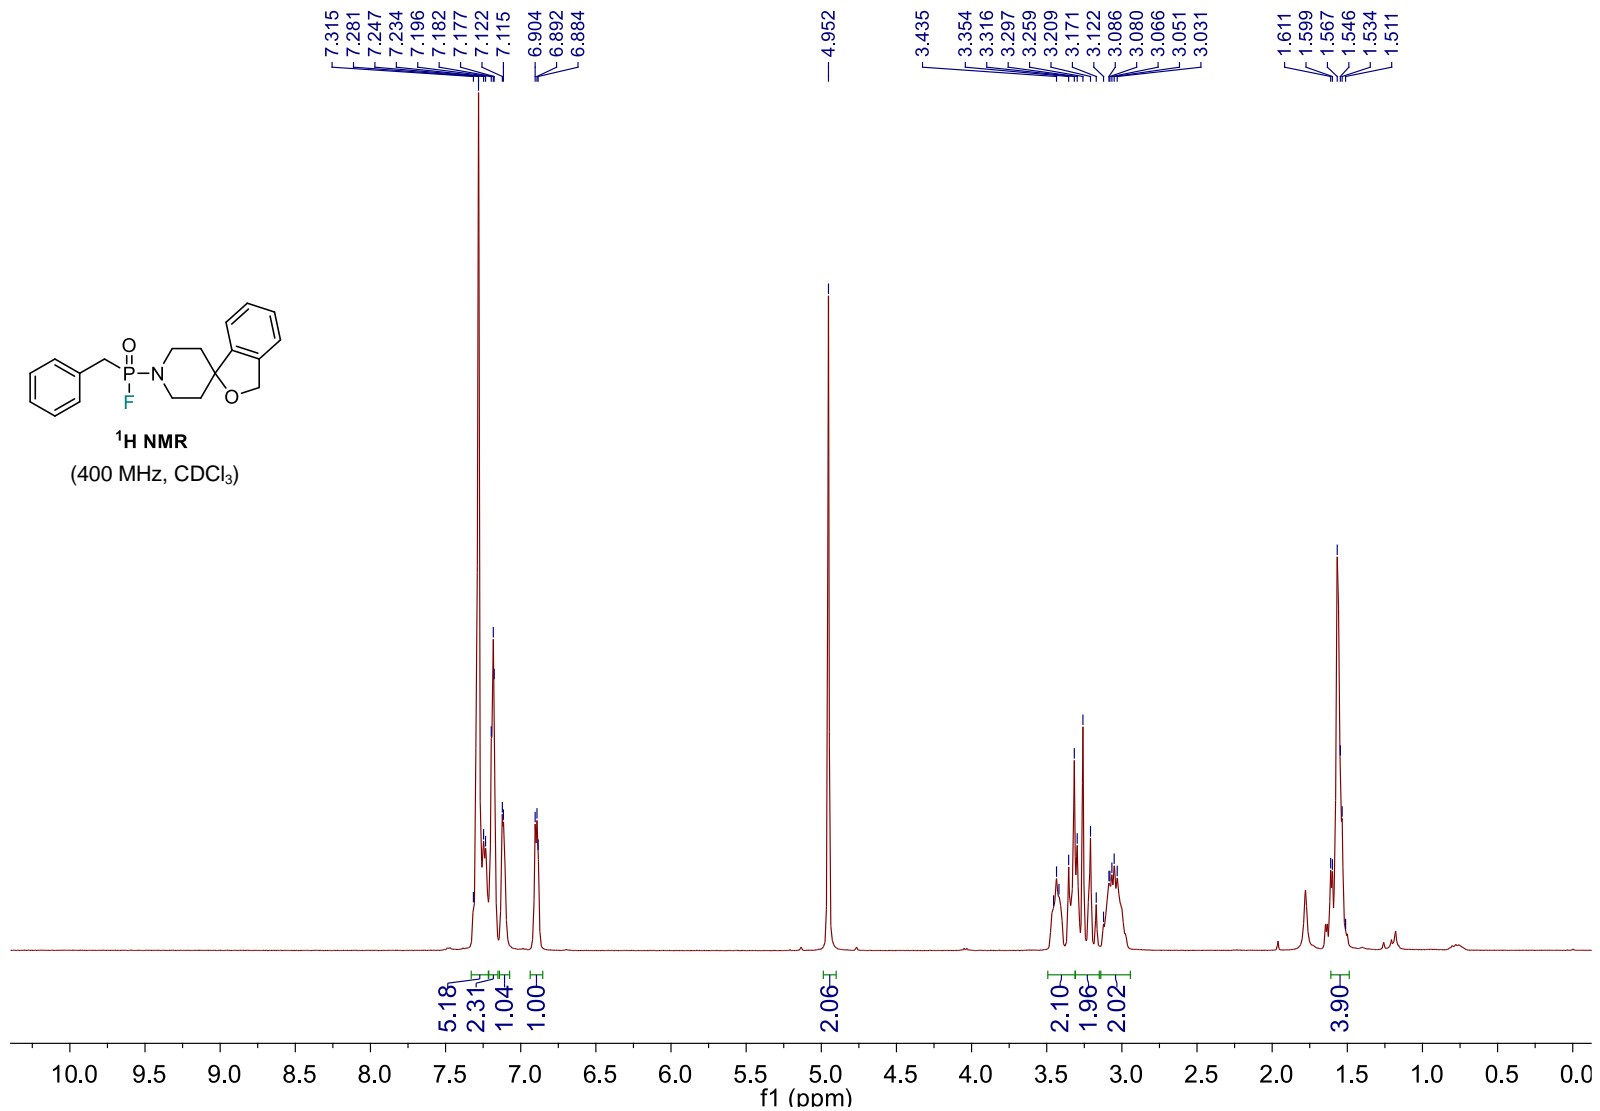

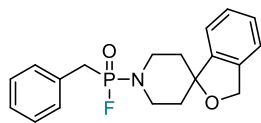

**<sup>13</sup>C NMR**  
(100 MHz, CDCl<sub>3</sub>)

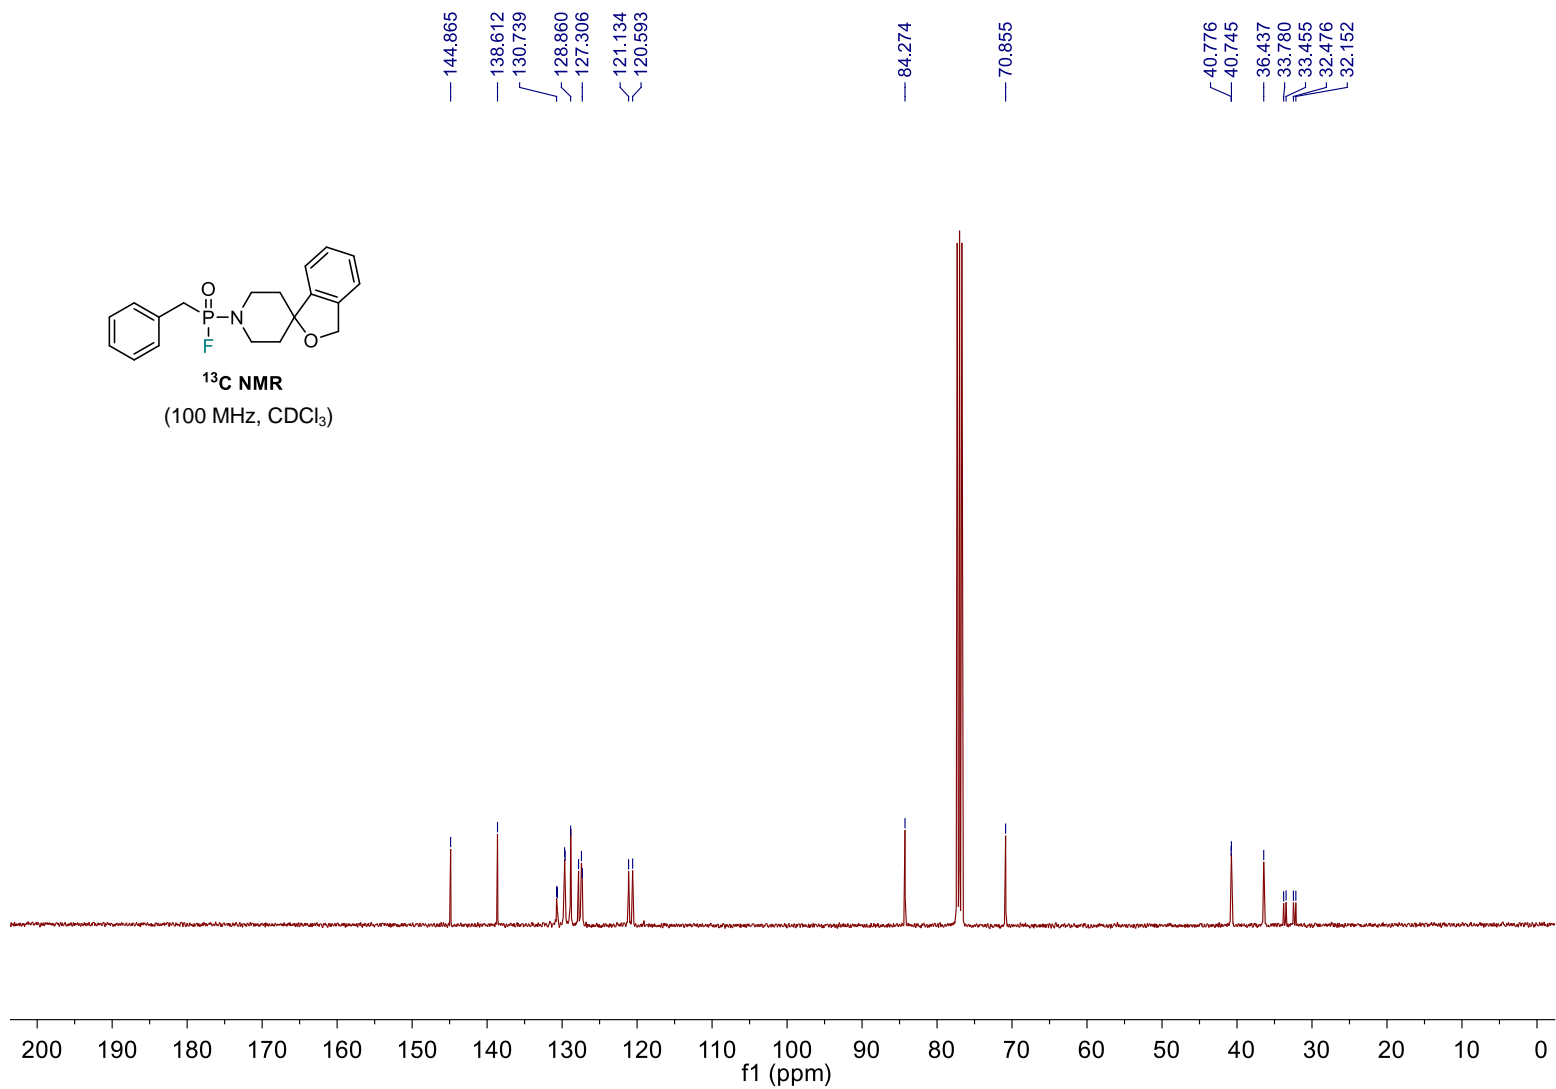

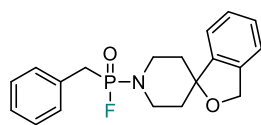

**<sup>31</sup>P NMR**  
(162 MHz, CDCl<sub>3</sub>)

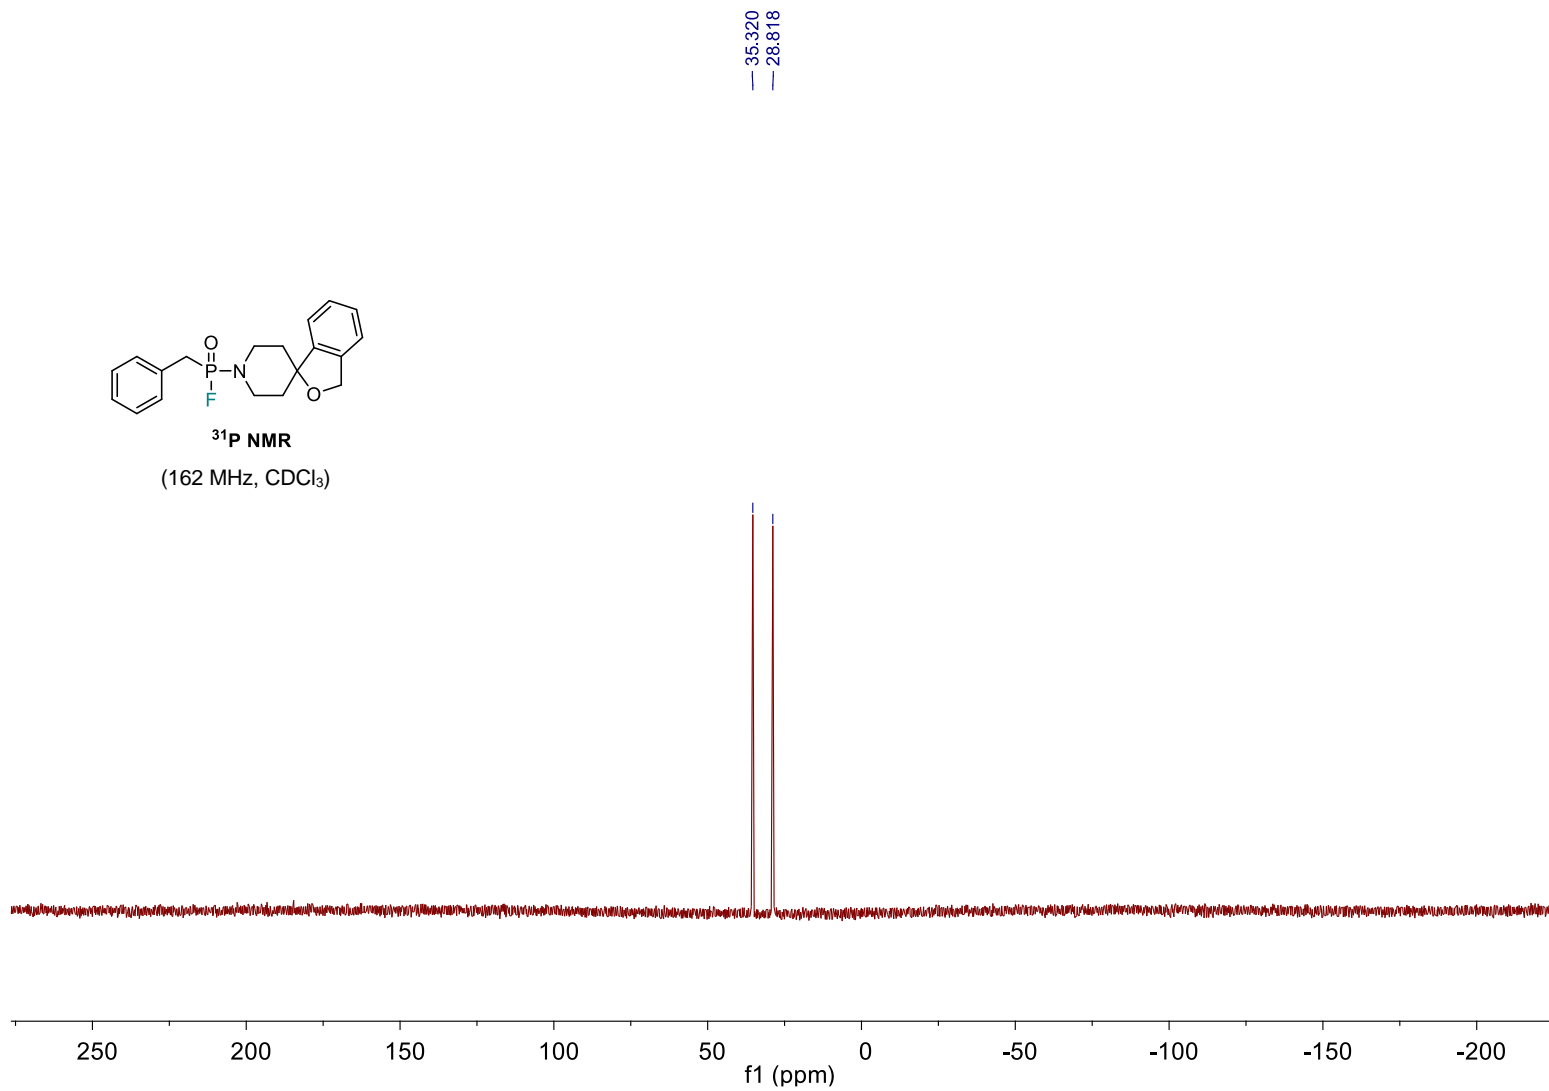

S391

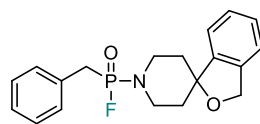

**<sup>19</sup>F NMR**  
(376 MHz, CDCl<sub>3</sub>)

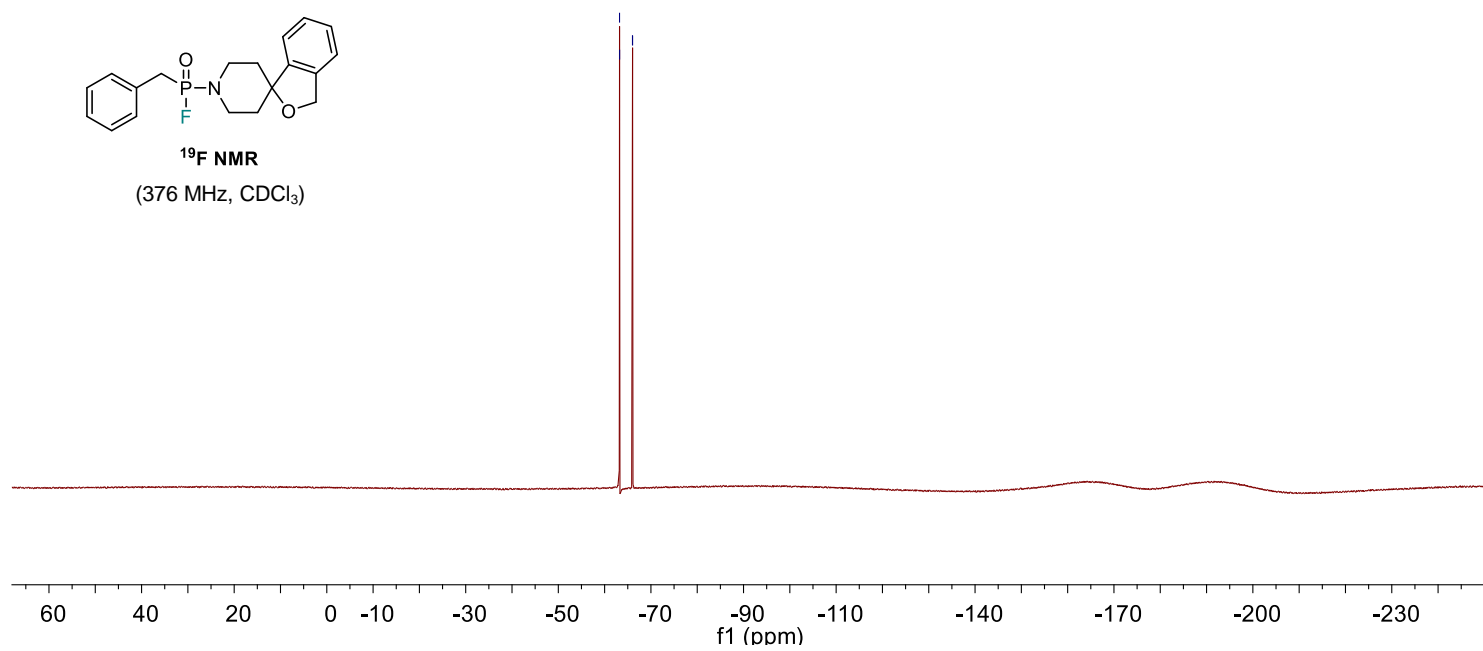



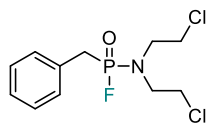

**<sup>1</sup>H NMR**  
(400 MHz, CDCl<sub>3</sub>)

7.376  
7.360  
7.340

3.469  
3.445  
3.359  
3.347  
3.317  
3.307  
3.280  
3.245  
3.225

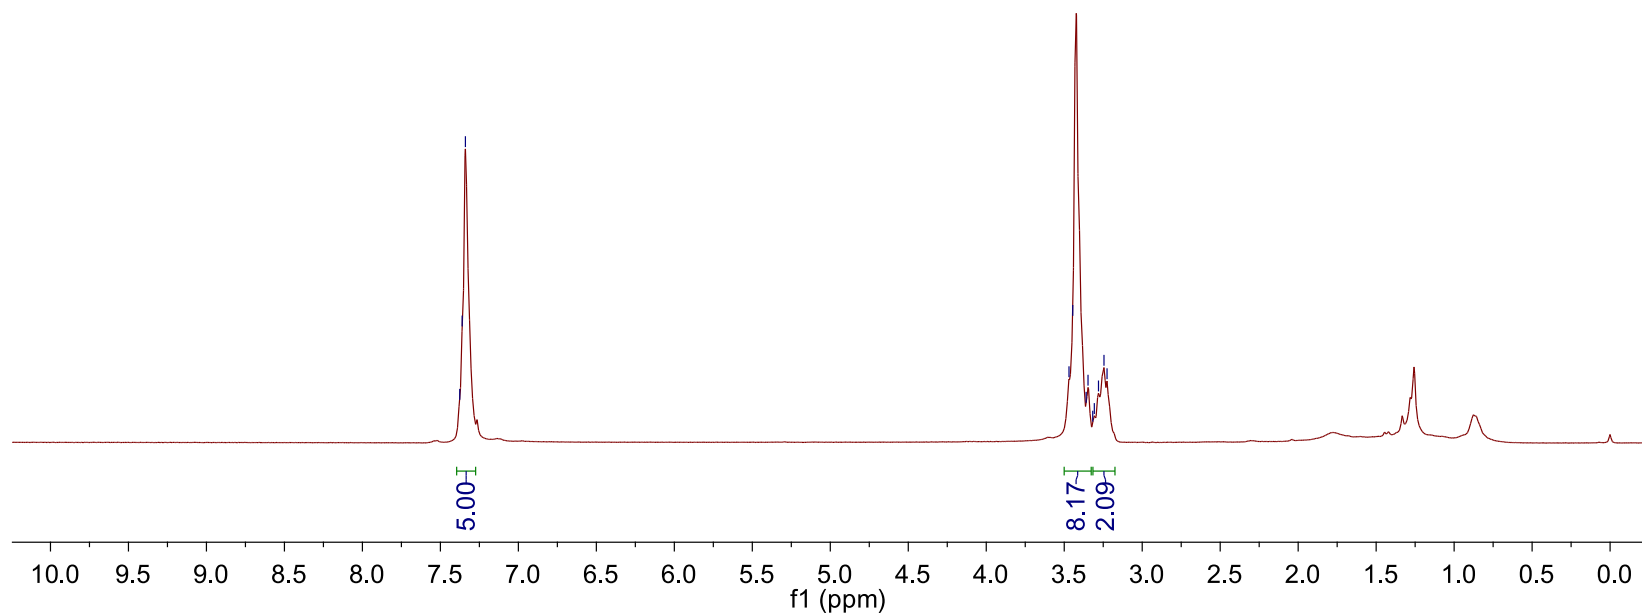

S393

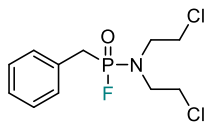

<sup>13</sup>C NMR  
(100 MHz, CDCl<sub>3</sub>)

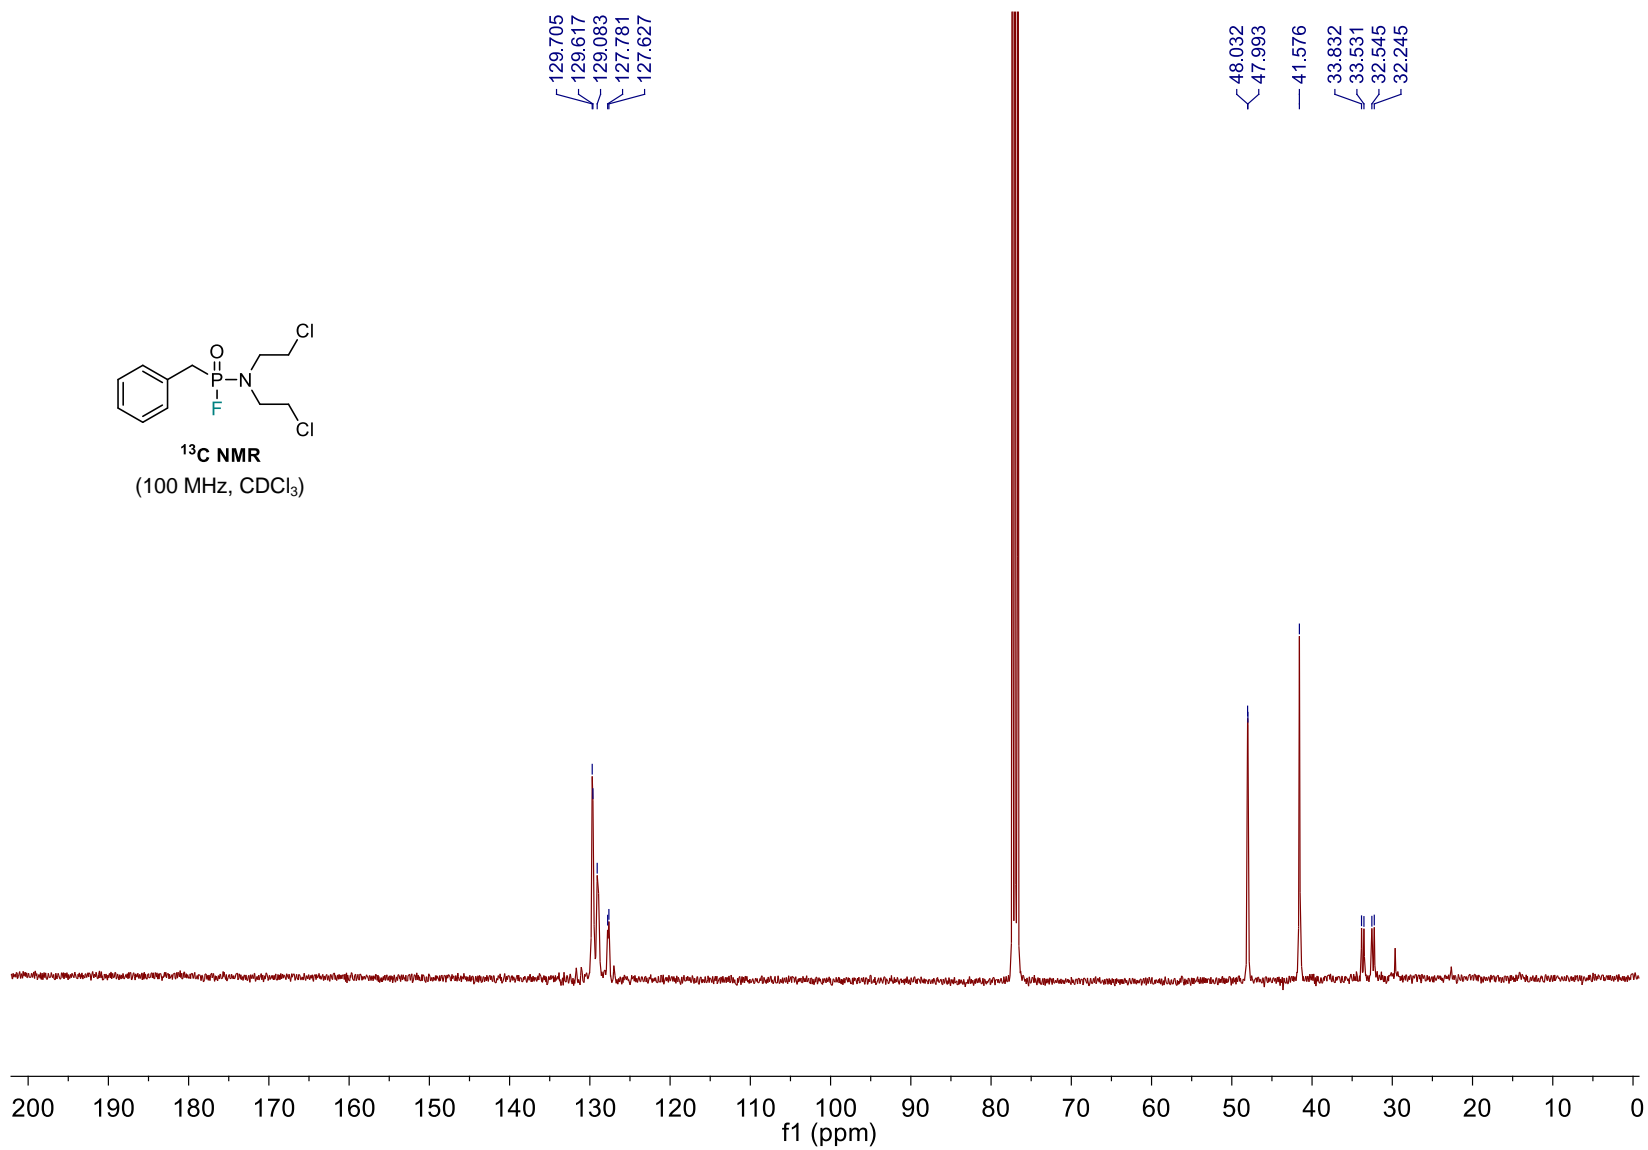

S394

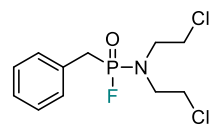

**<sup>31</sup>P NMR**  
(162 MHz, CDCl<sub>3</sub>)

-61.511  
-64.334

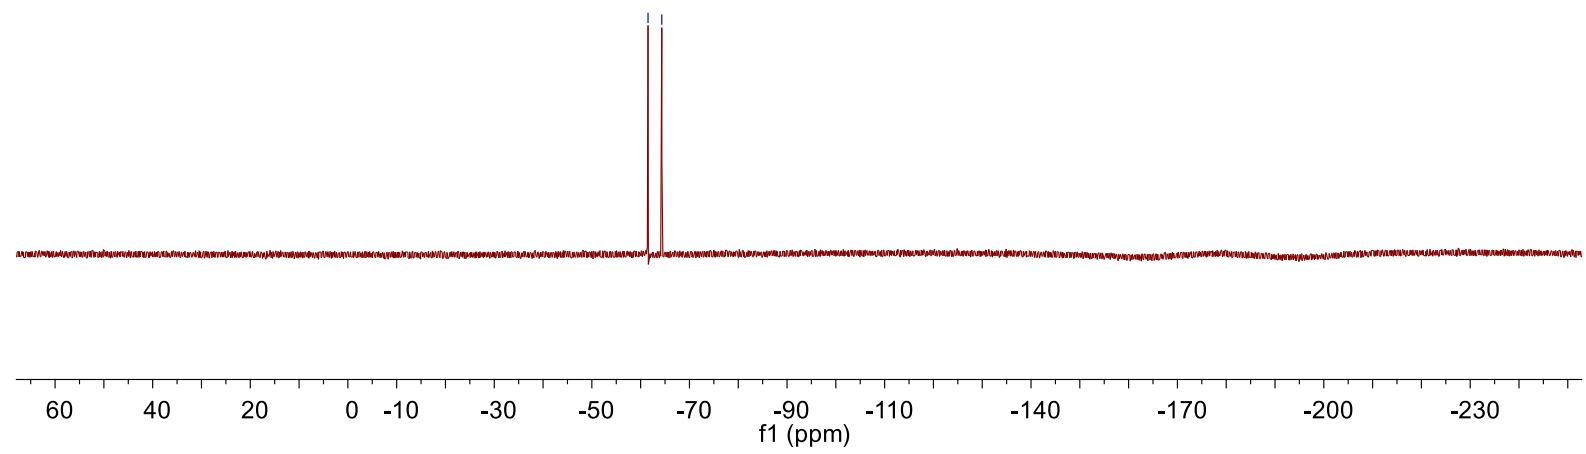

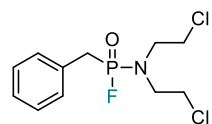

**<sup>19</sup>F NMR**  
(376 MHz, CDCl<sub>3</sub>)

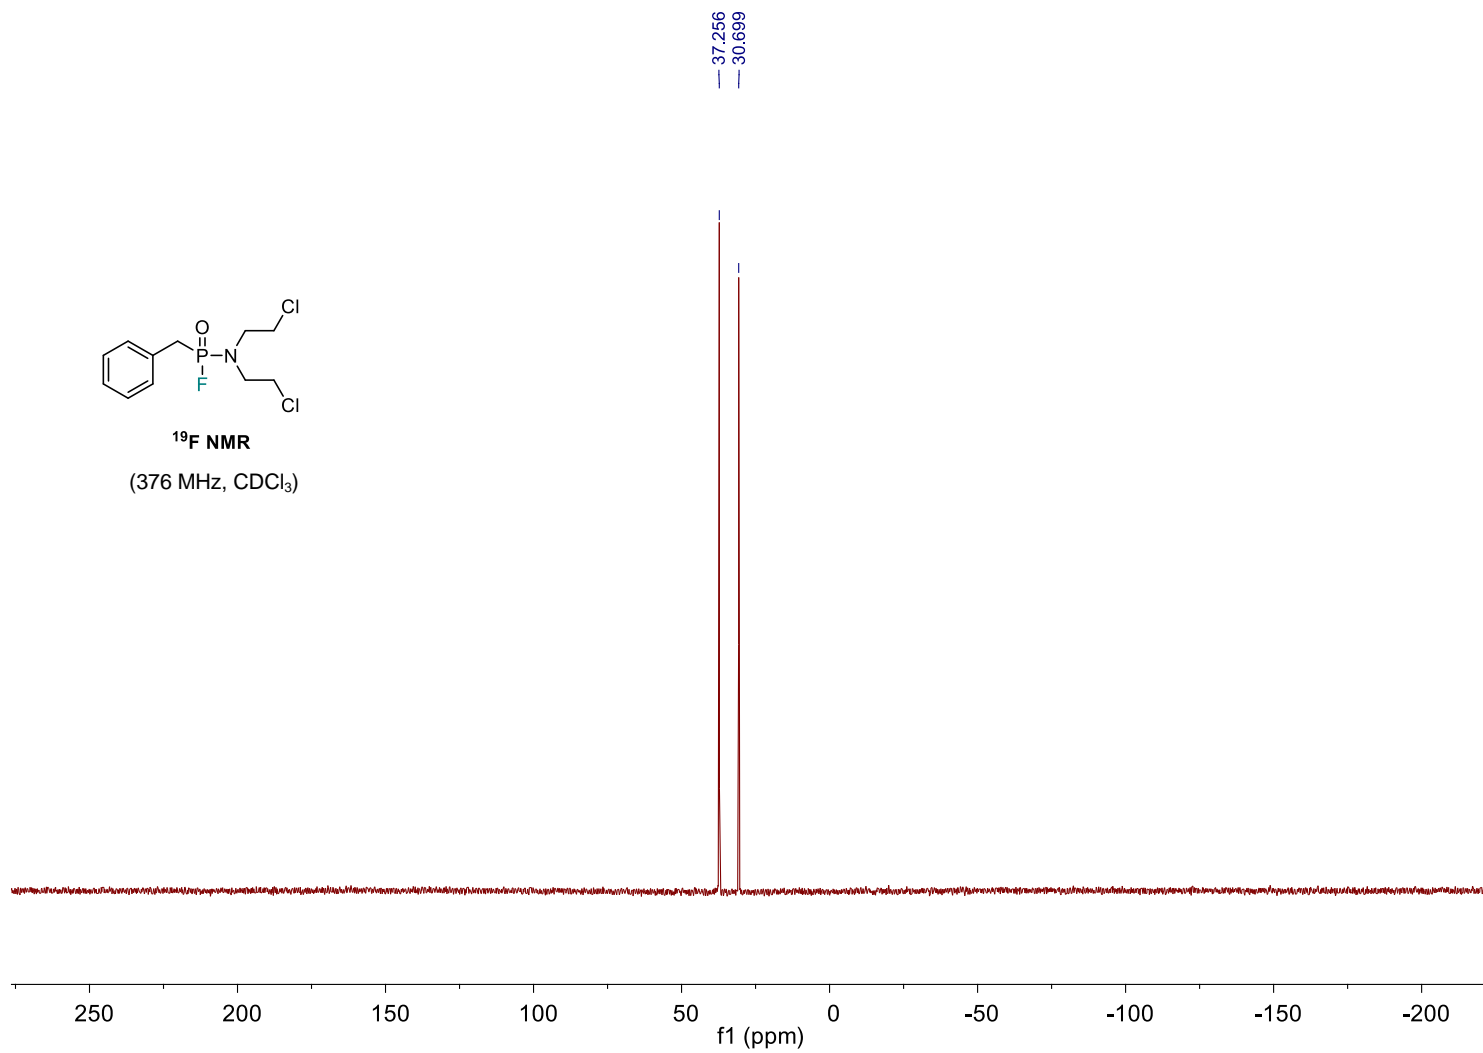

S396

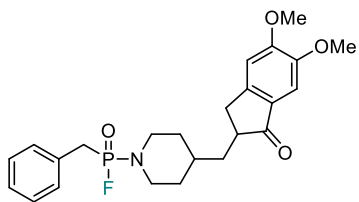

**<sup>1</sup>H NMR**  
(400 MHz, CDCl<sub>3</sub>)

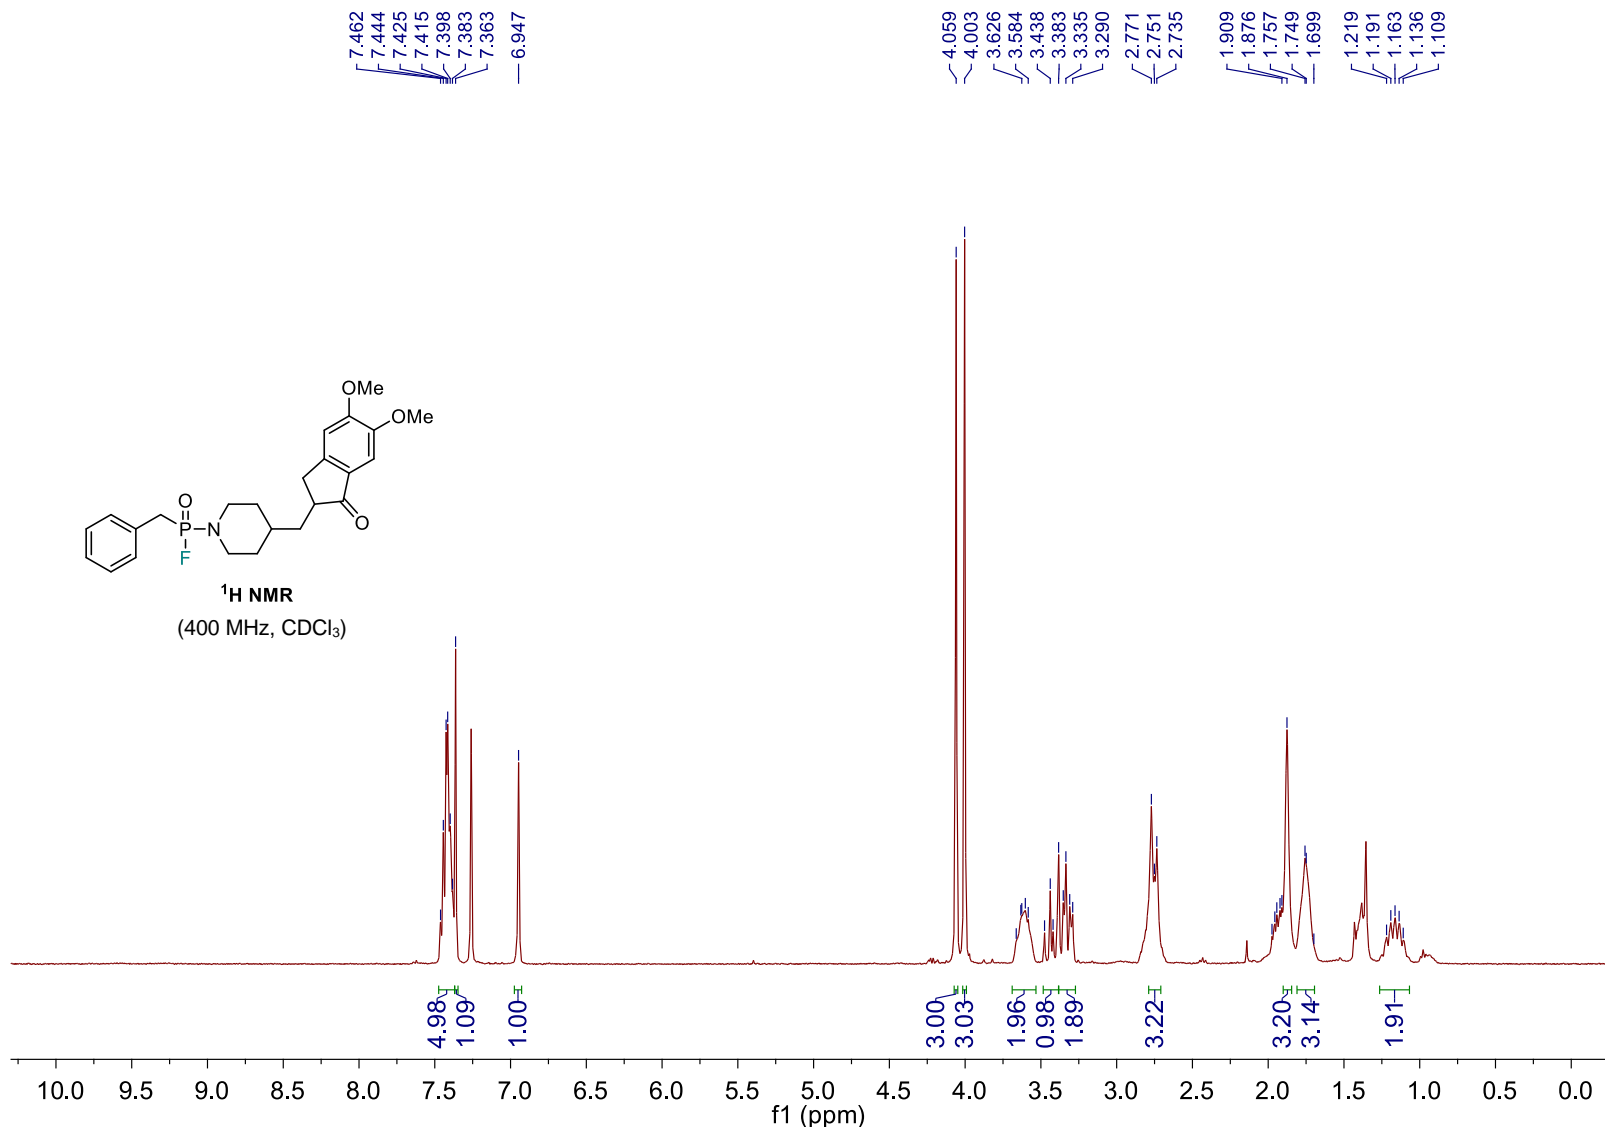

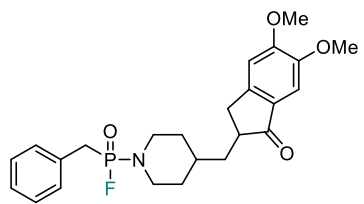

<sup>13</sup>C NMR  
(100 MHz, CDCl<sub>3</sub>)

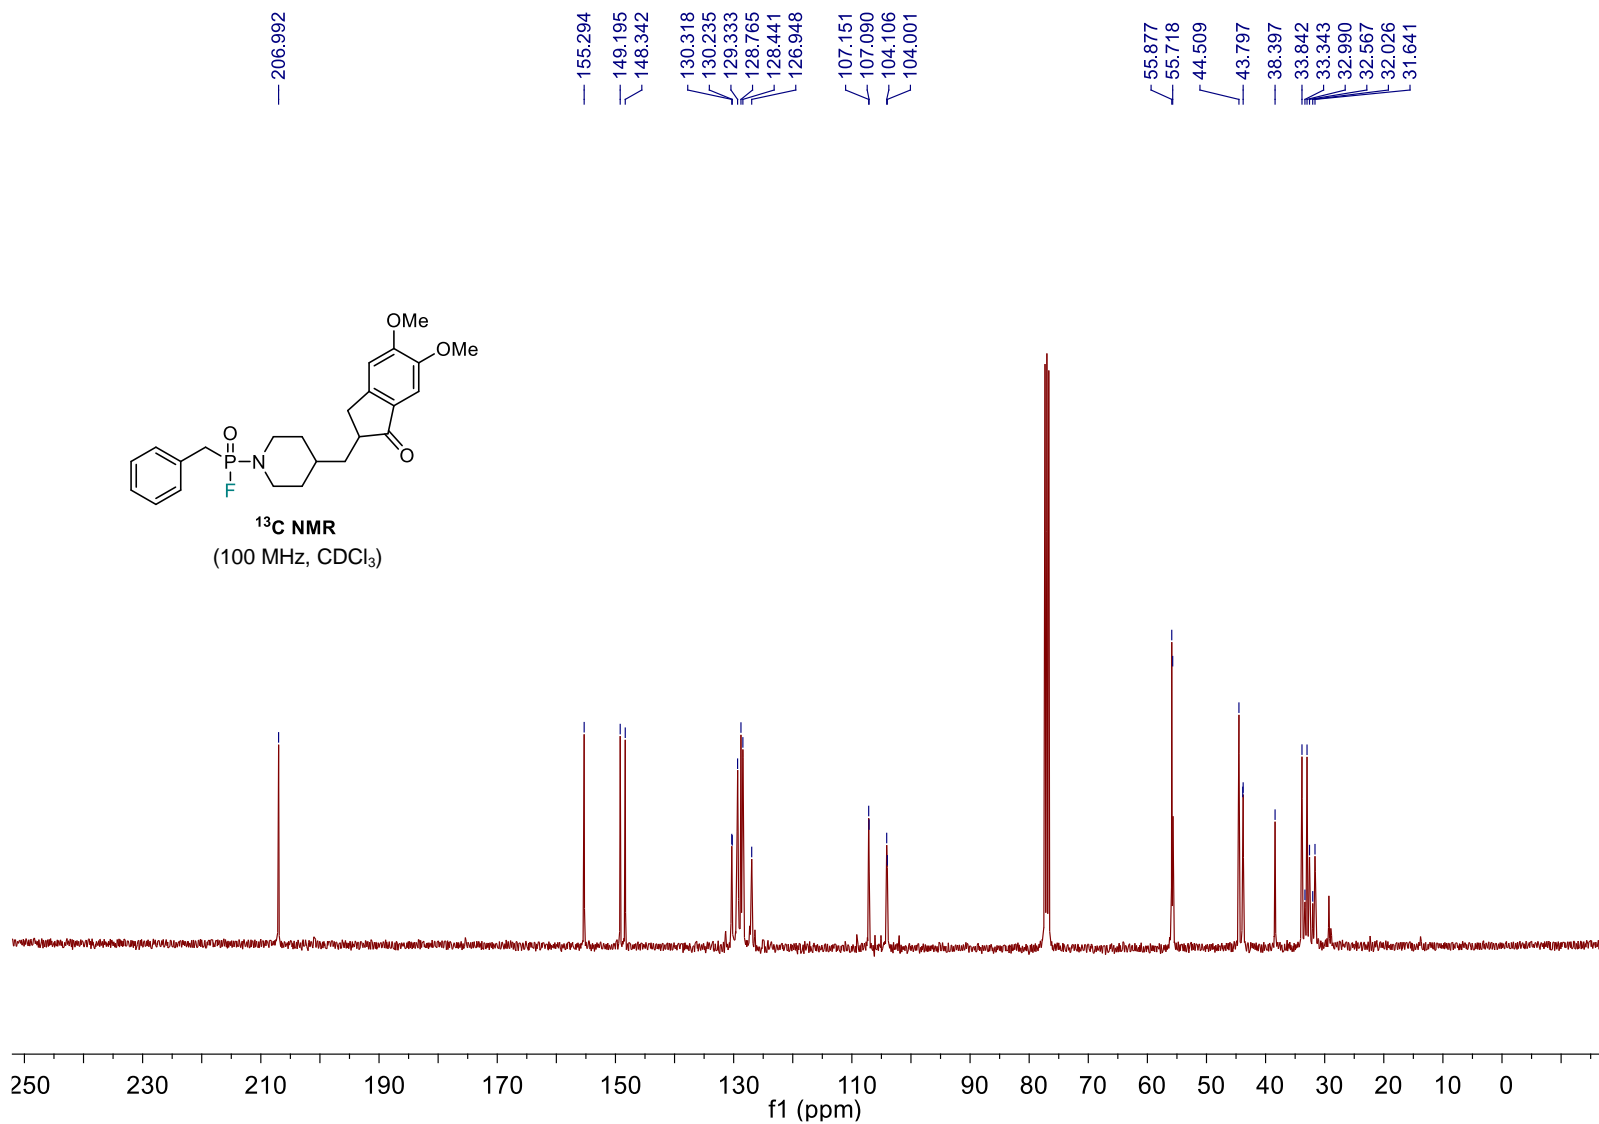

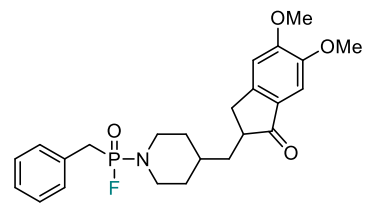

**<sup>31</sup>P NMR**  
(162 MHz, CDCl<sub>3</sub>)

— 35.219  
— 28.717

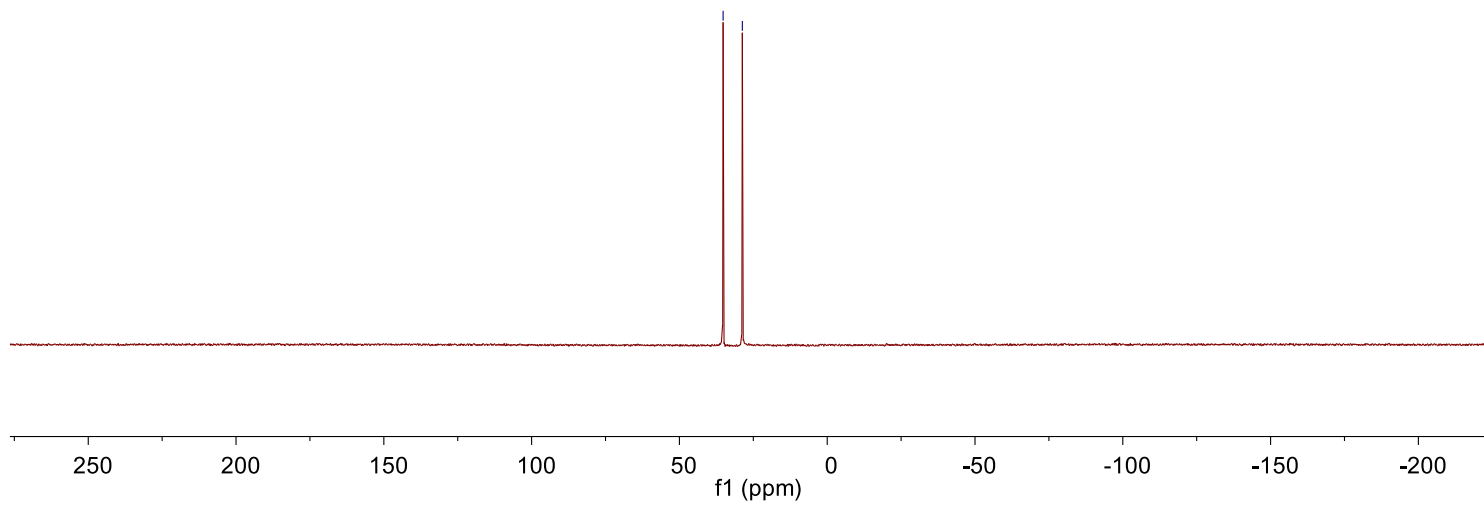

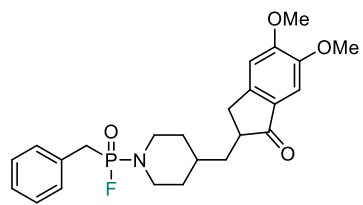

**<sup>19</sup>F NMR**  
(376 MHz, CDCl<sub>3</sub>)

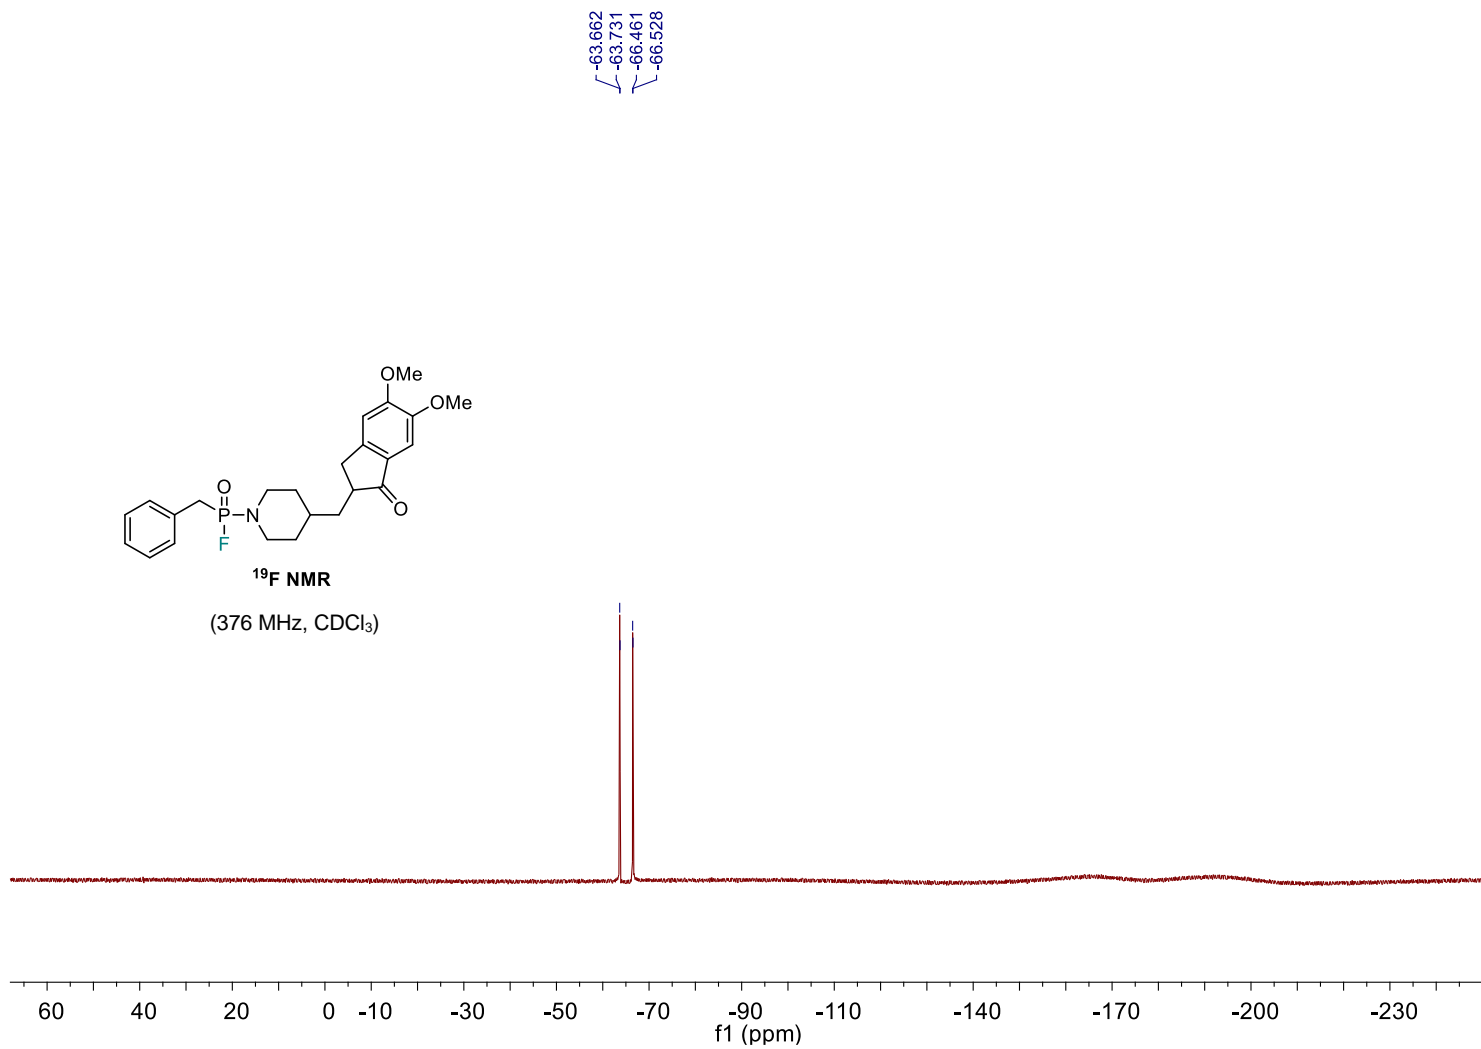



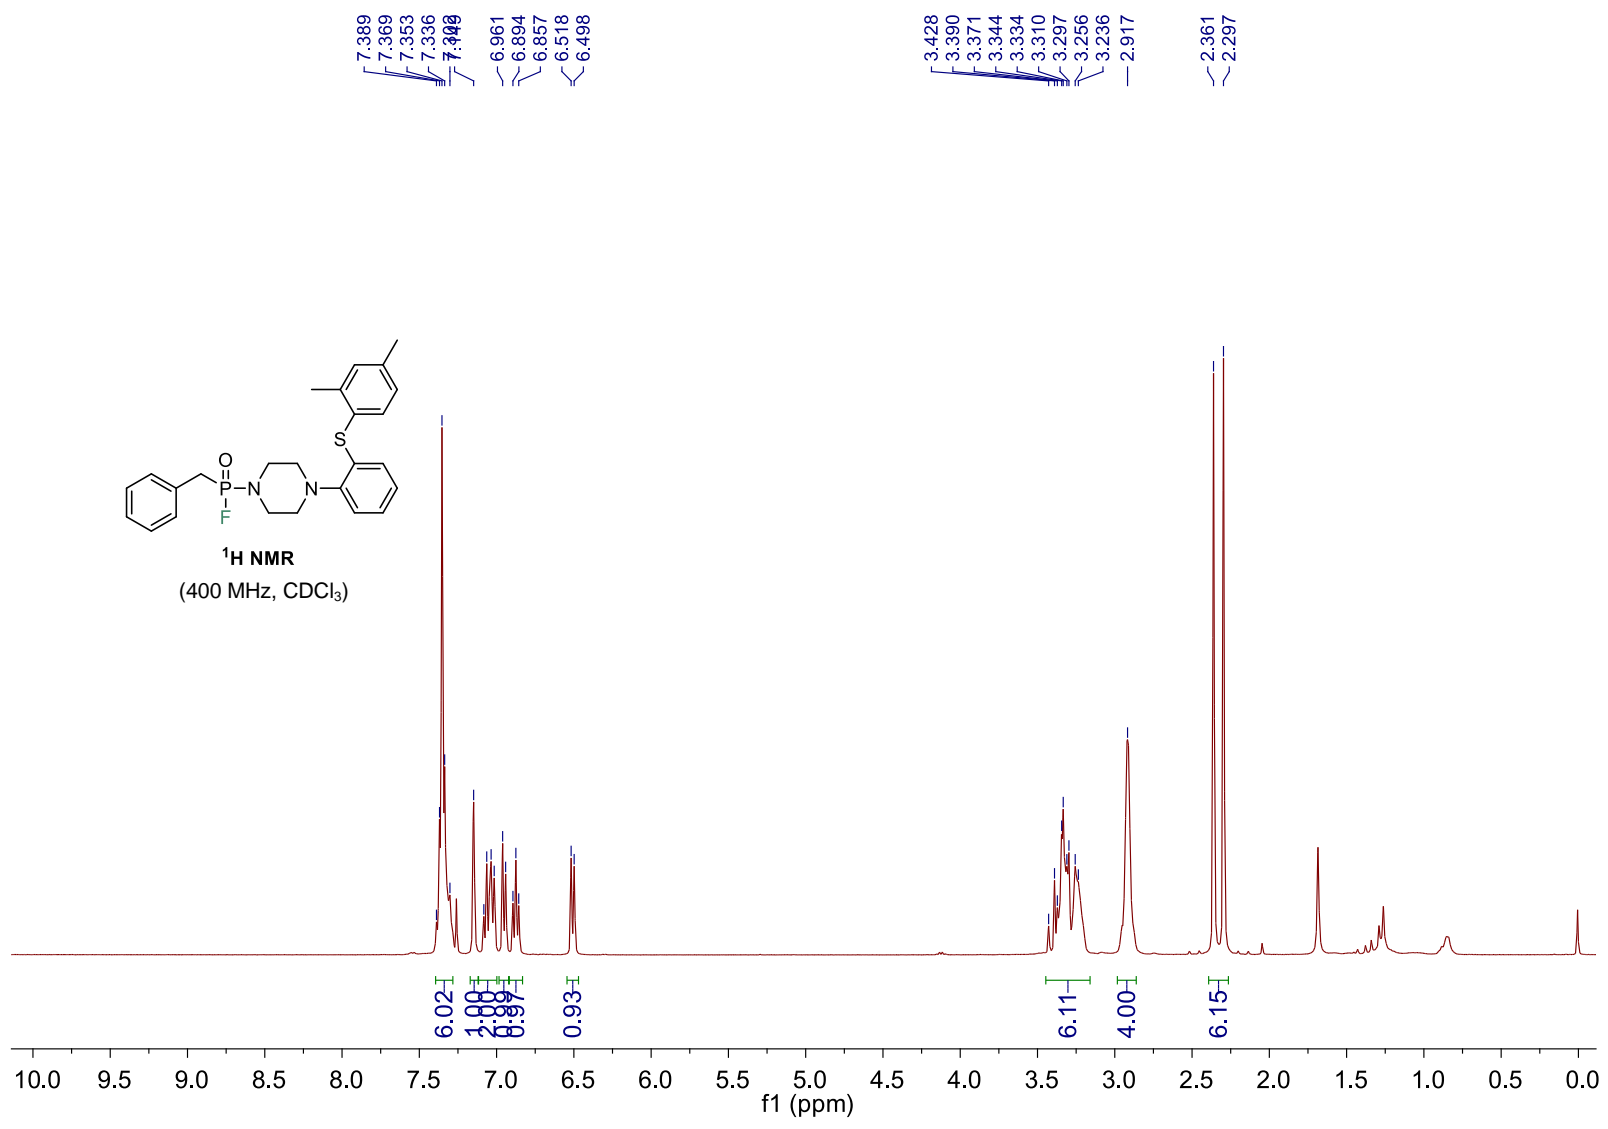

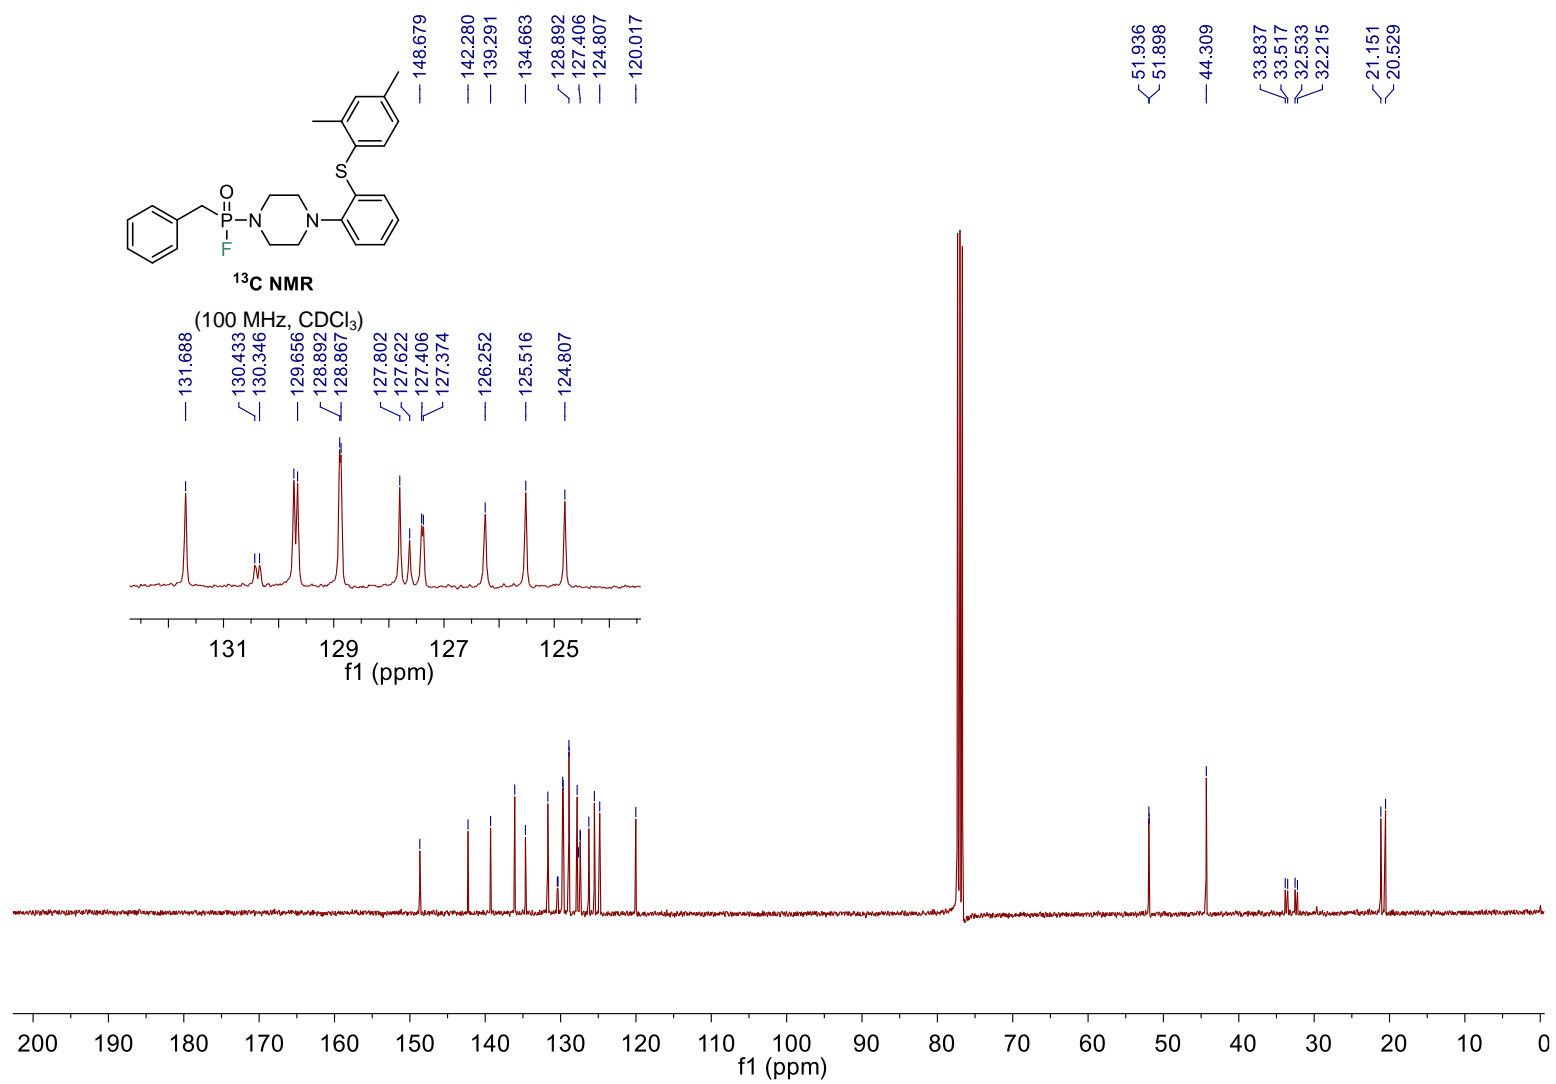

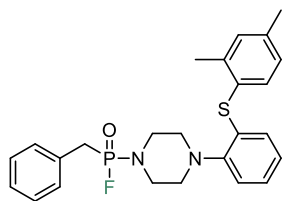

**<sup>31</sup>P NMR**  
(162 MHz, CDCl<sub>3</sub>)

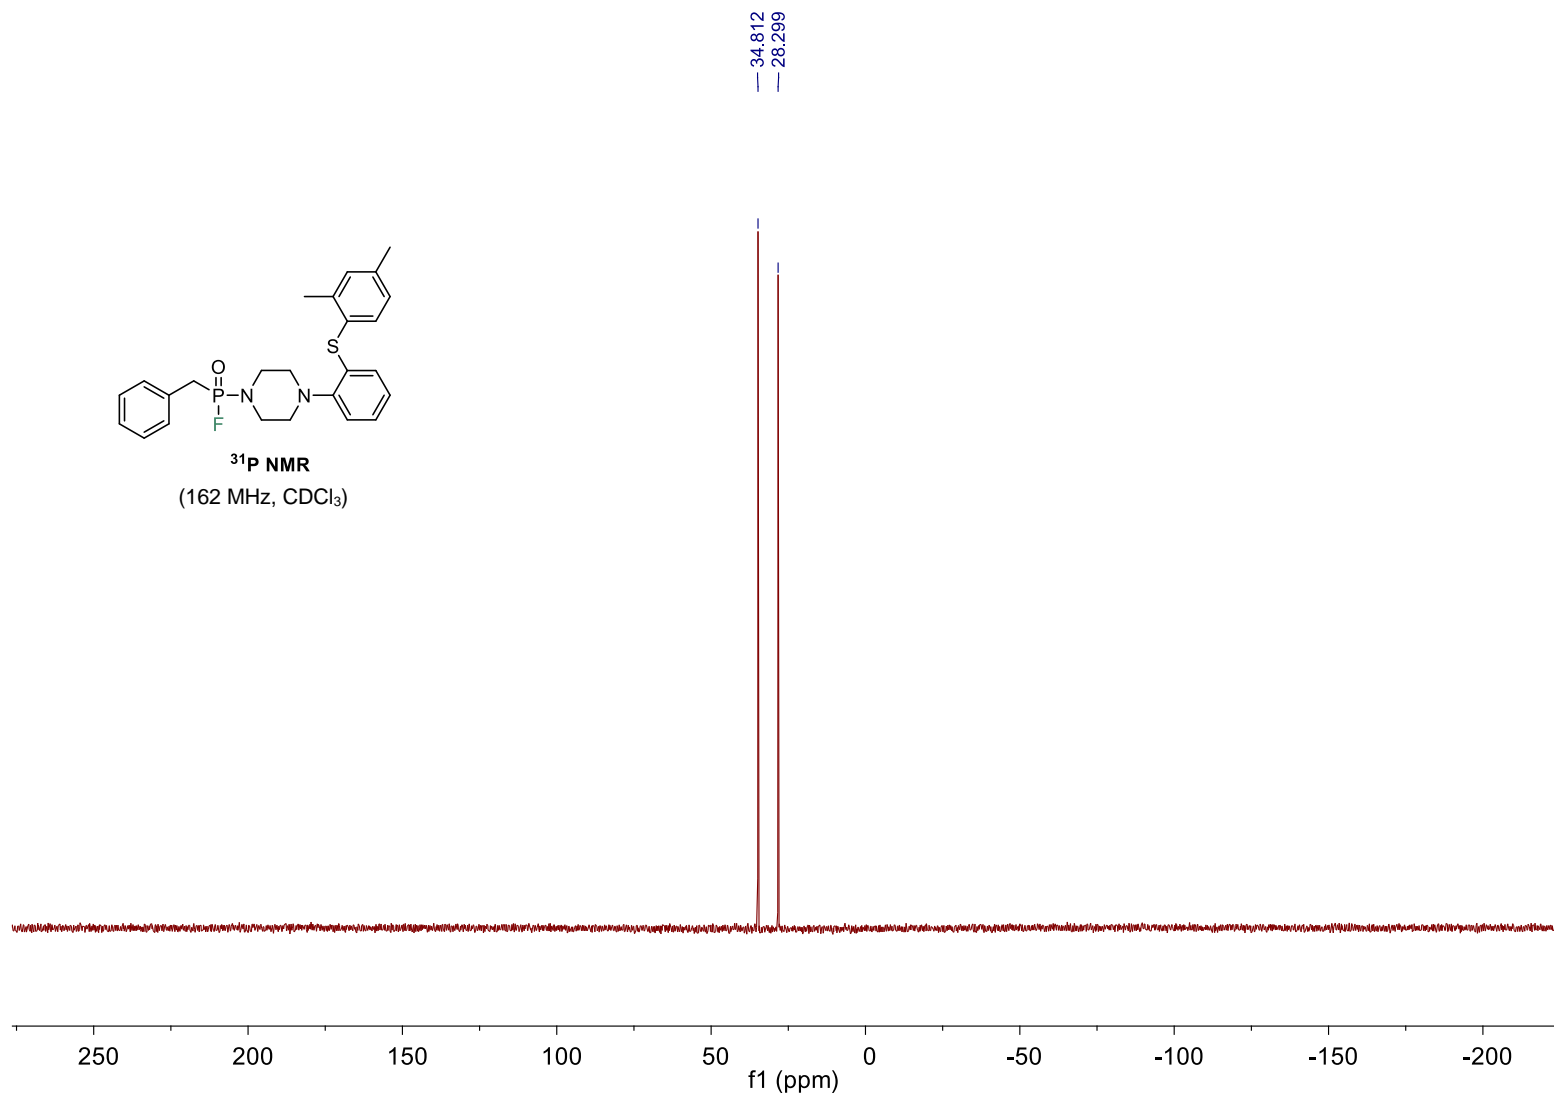

S403

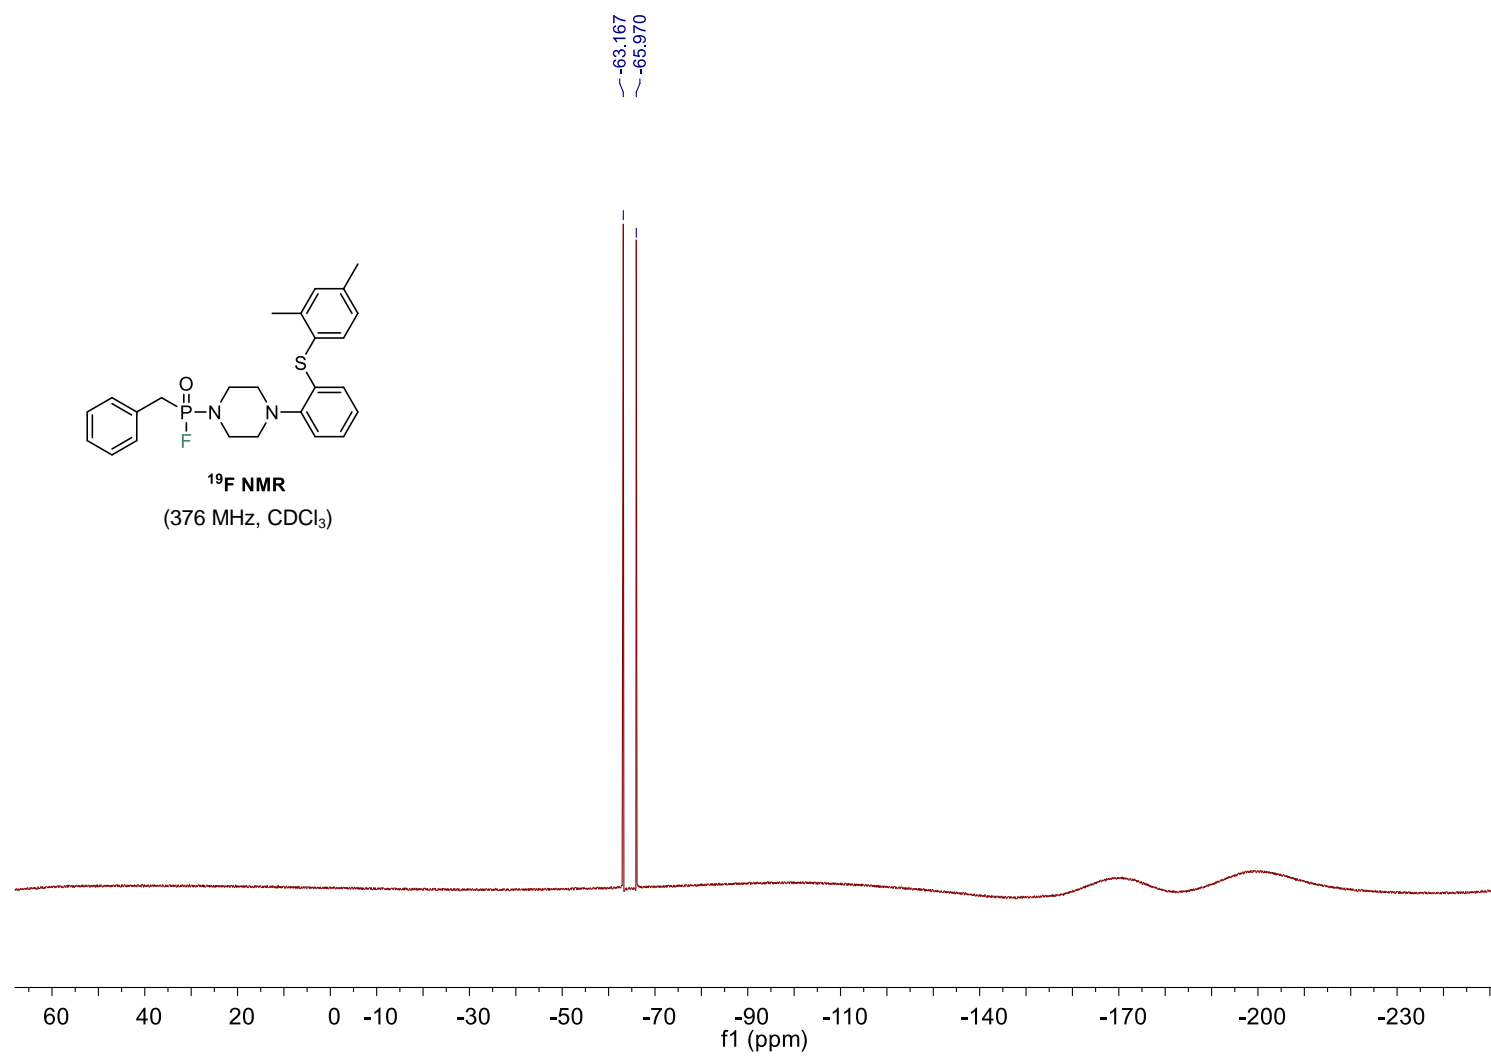

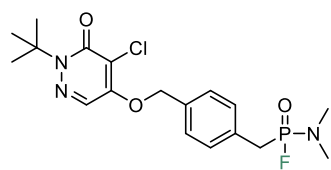

<sup>1</sup>H NMR  
(400 MHz, CDCl<sub>3</sub>)

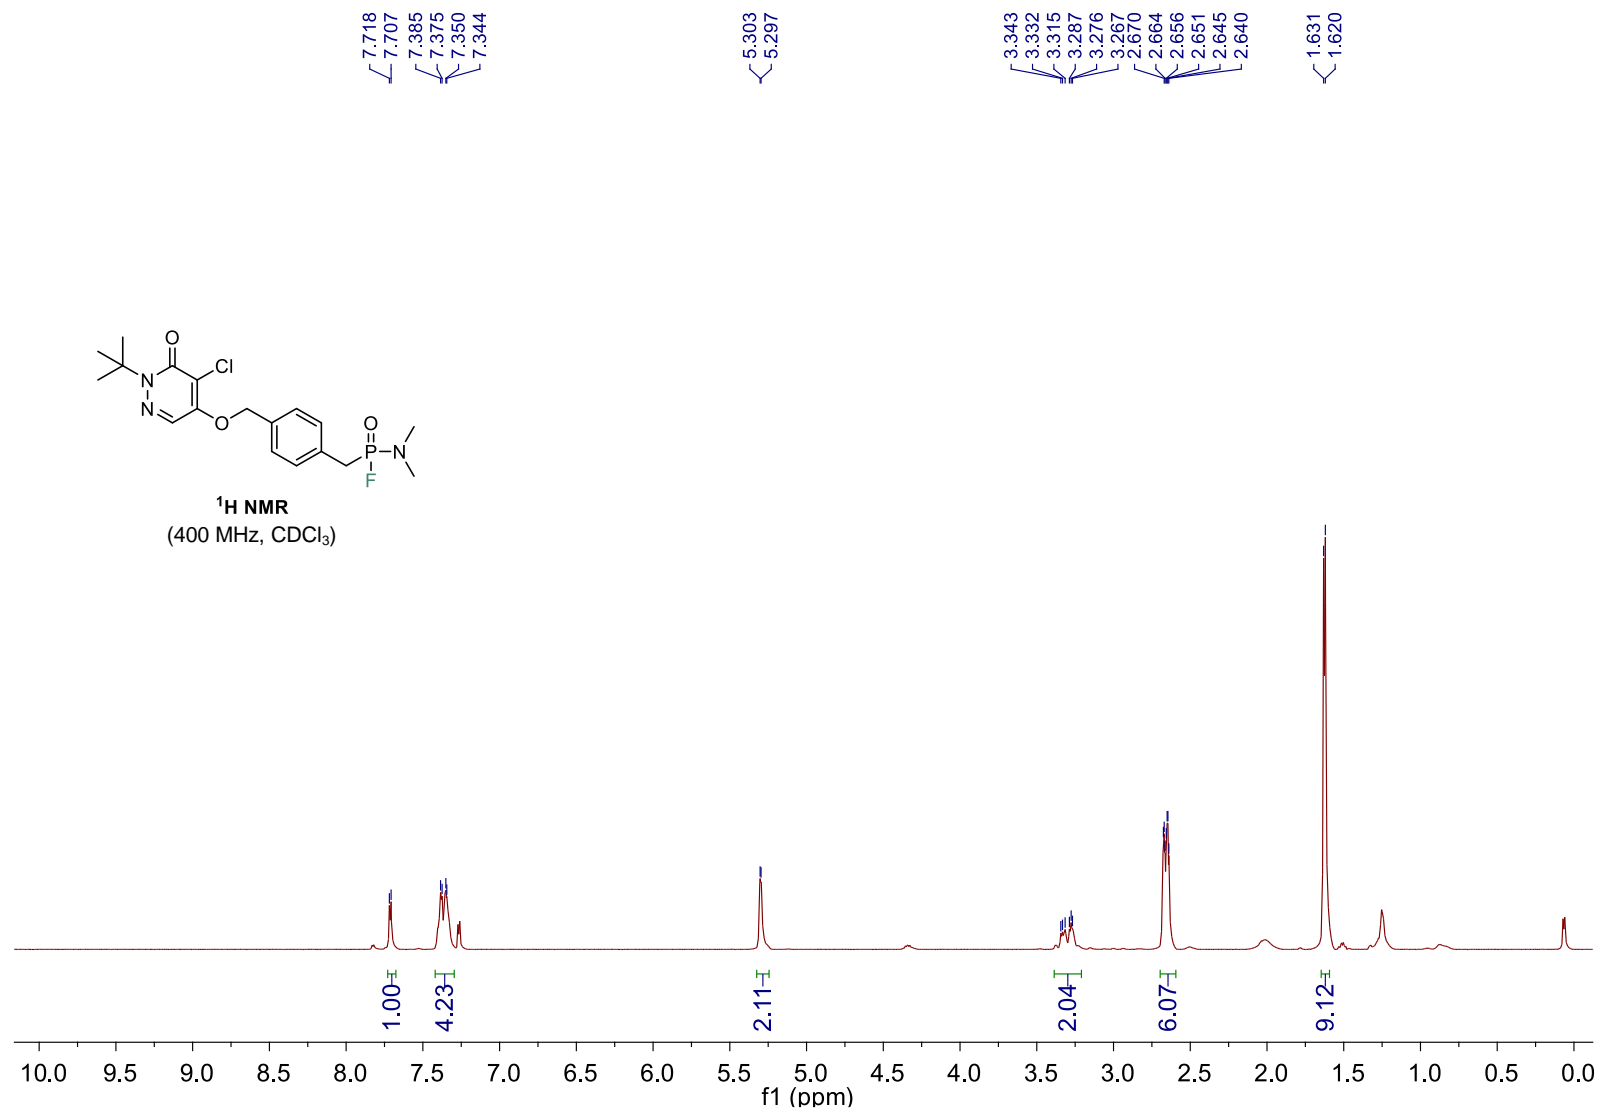

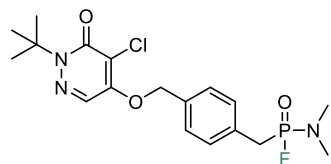

**<sup>13</sup>C NMR**  
(100 MHz, CDCl<sub>3</sub>)

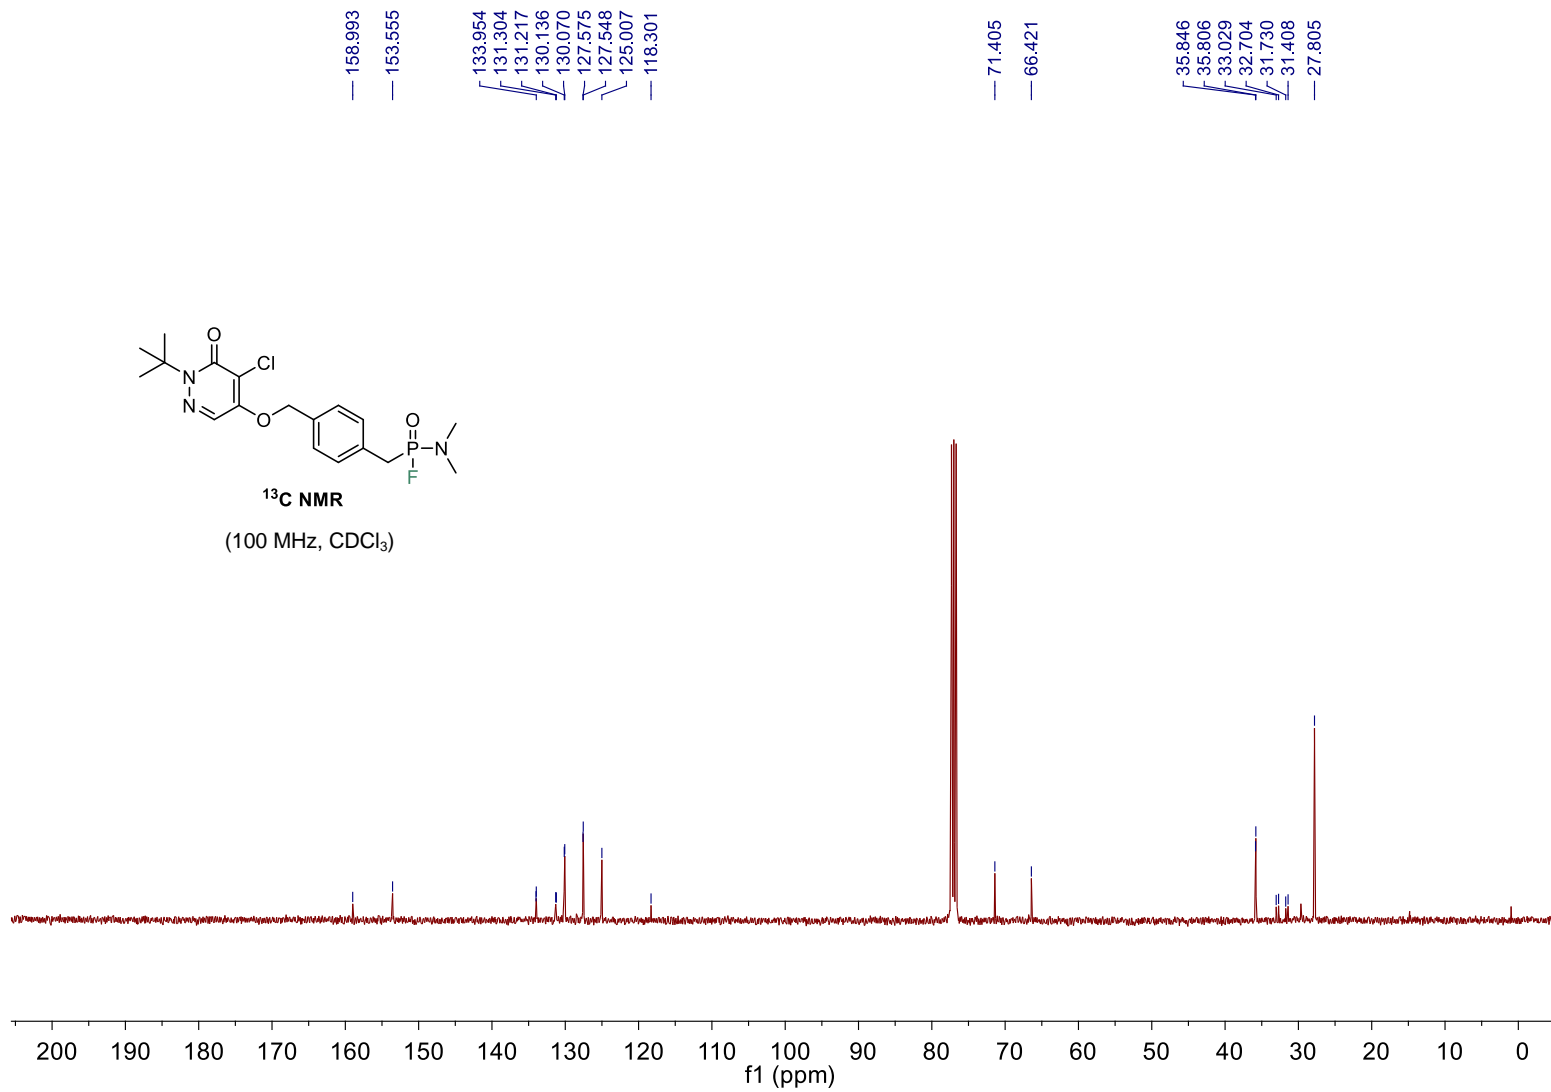

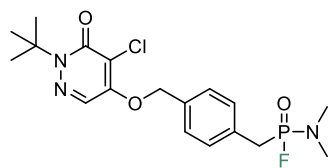

**<sup>31</sup>P NMR**  
(162 MHz, CDCl<sub>3</sub>)

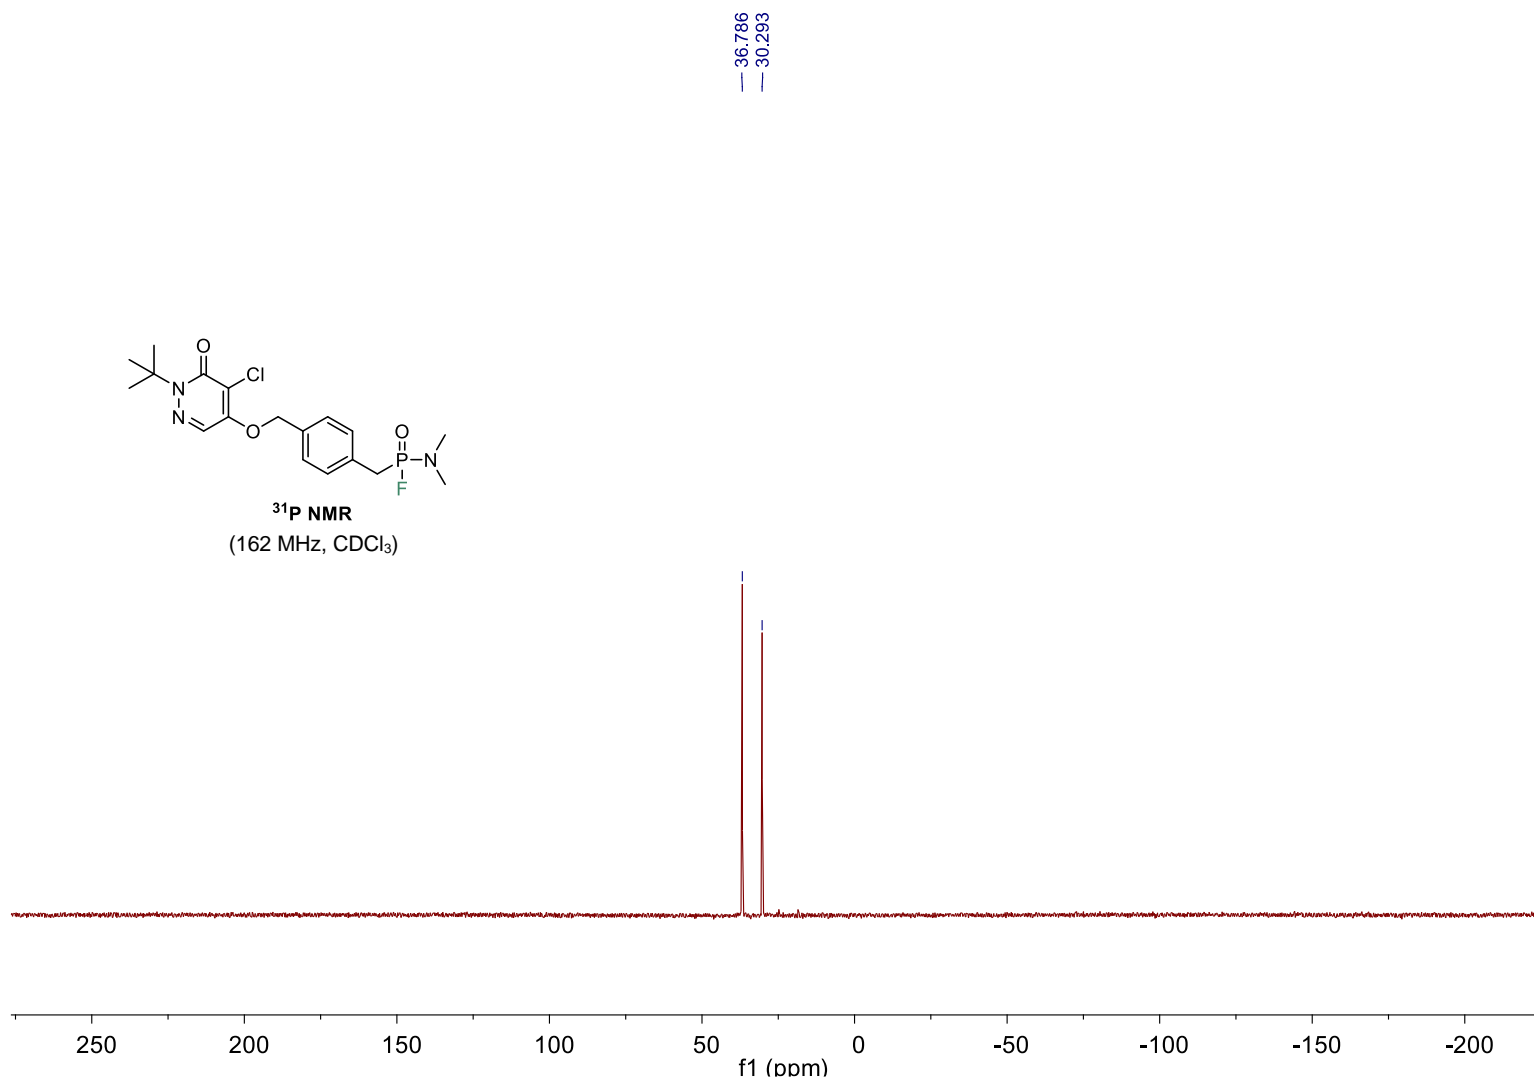

S407

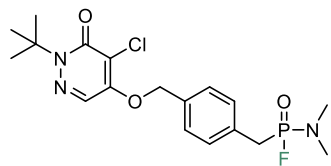

**<sup>19</sup>F NMR**  
(376 MHz, CDCl<sub>3</sub>)

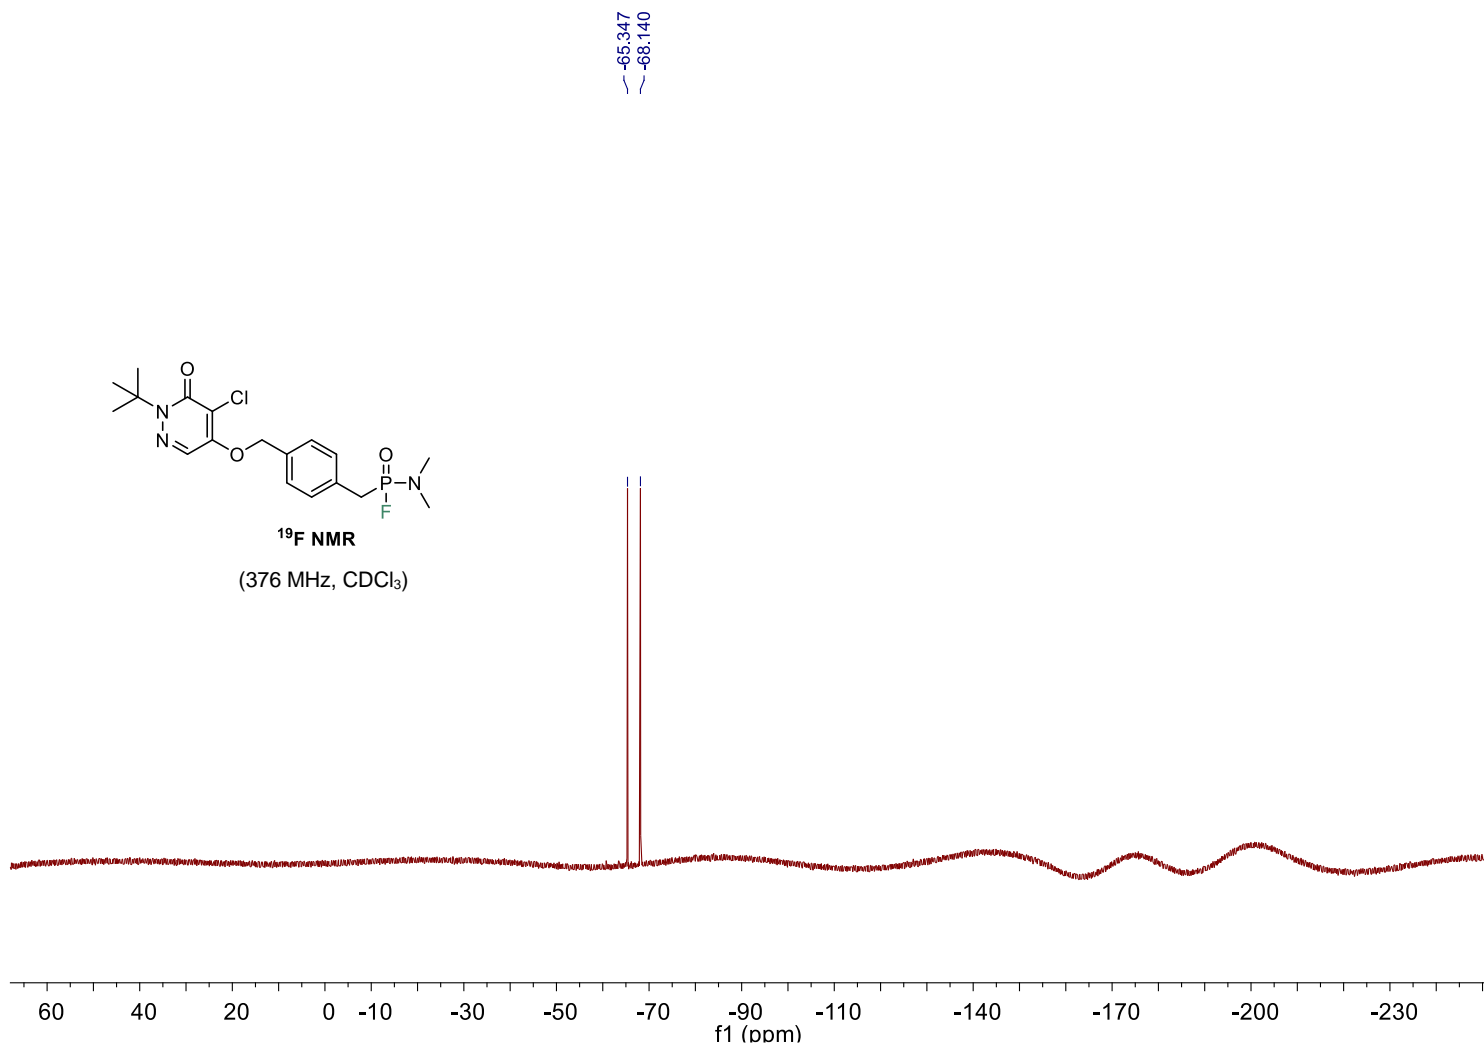



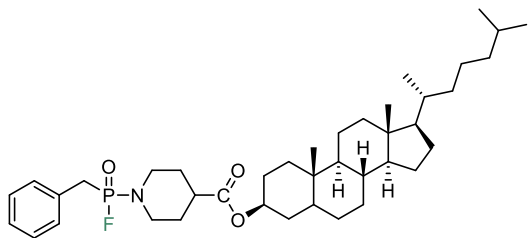

**<sup>1</sup>H NMR**  
(400 MHz, DMSO-*d*<sub>6</sub>)

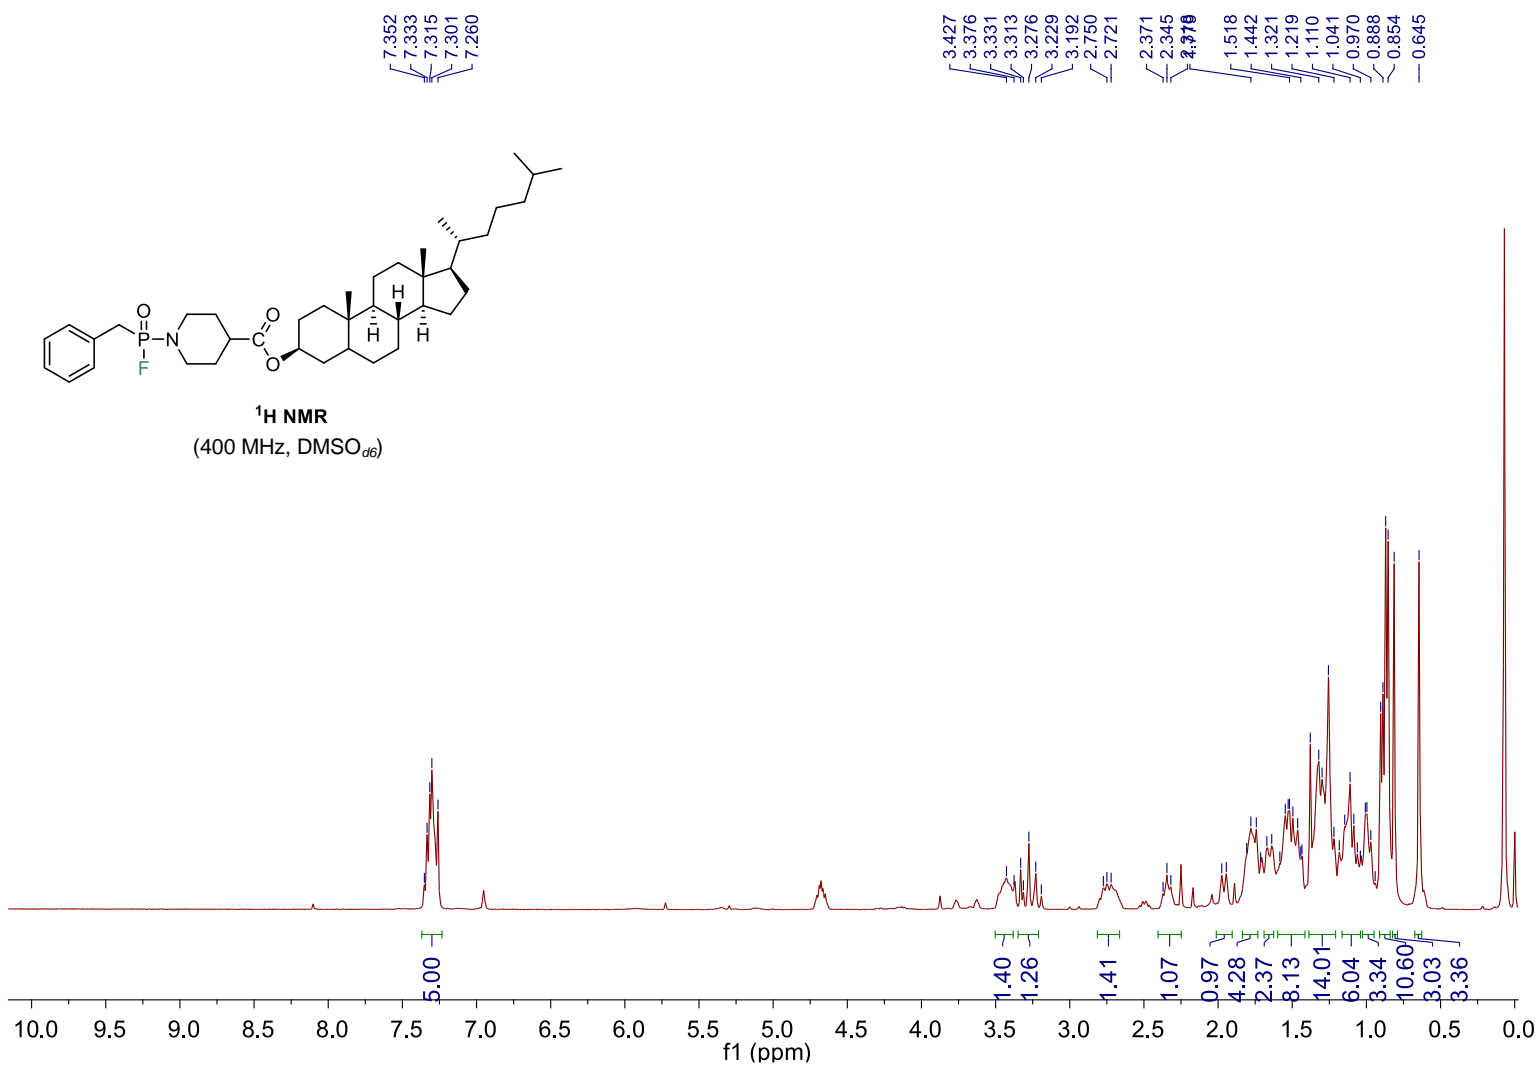

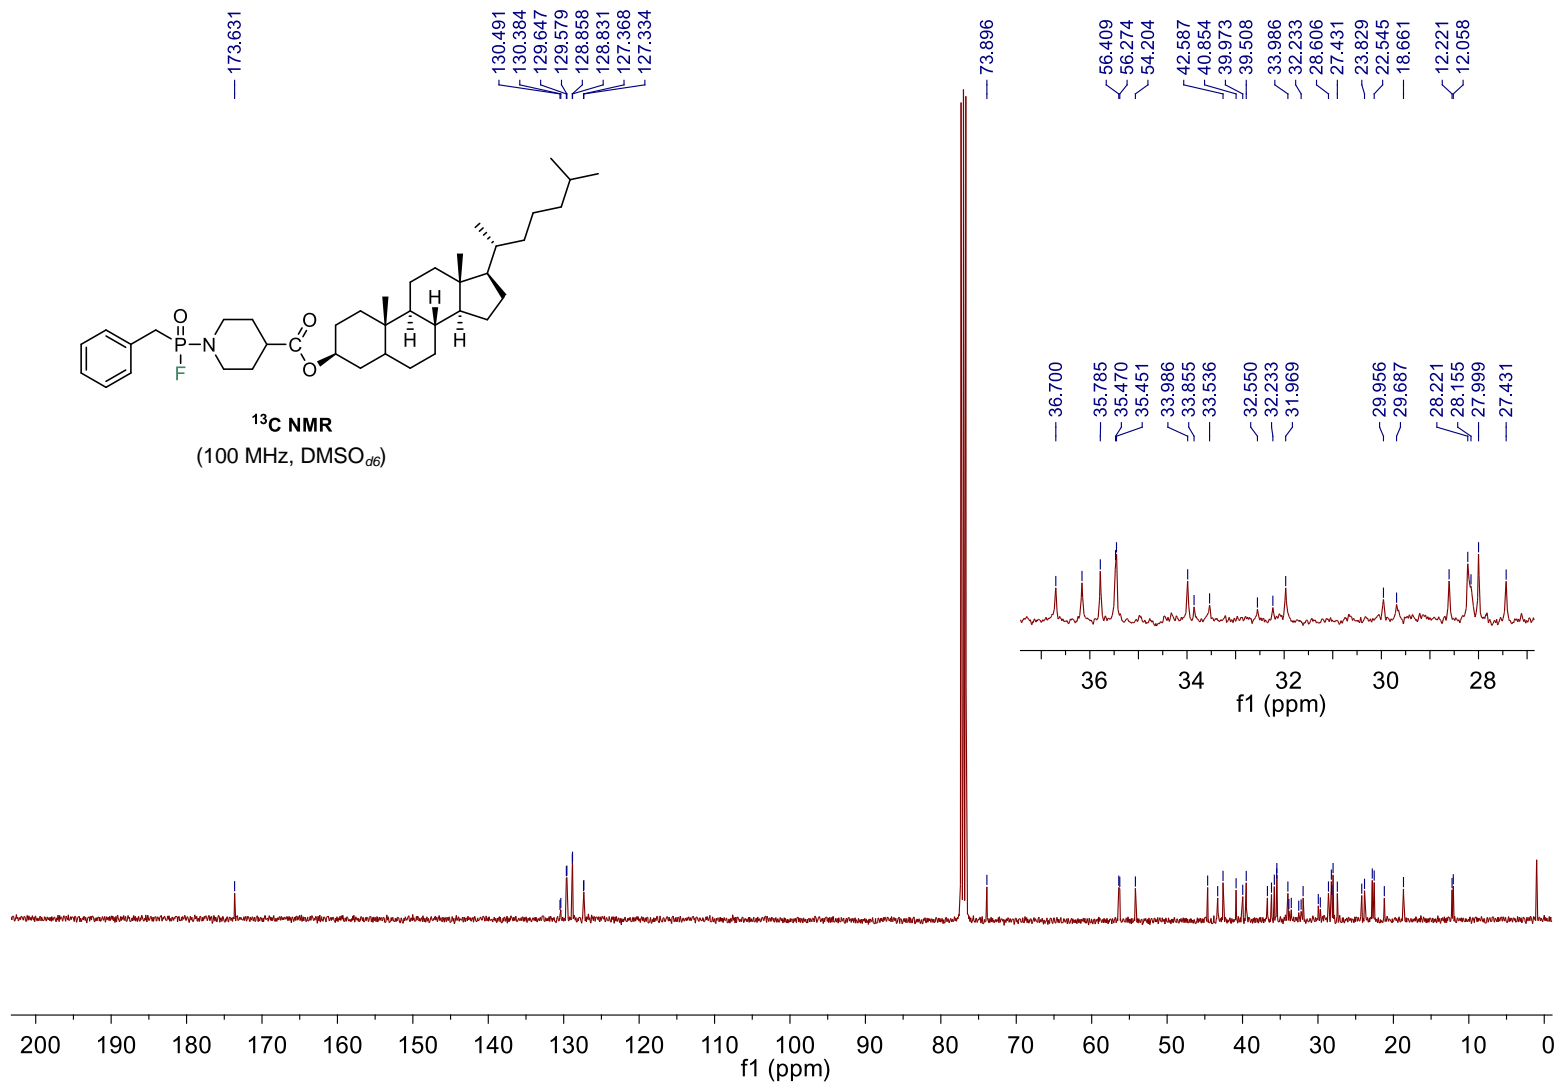

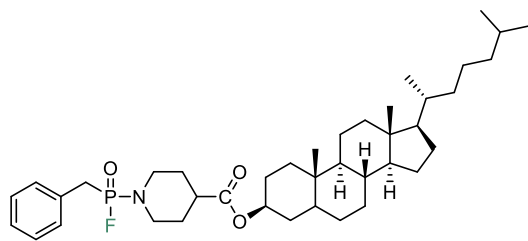

**<sup>31</sup>P NMR**  
(162 MHz, DMSO<sub>d6</sub>)

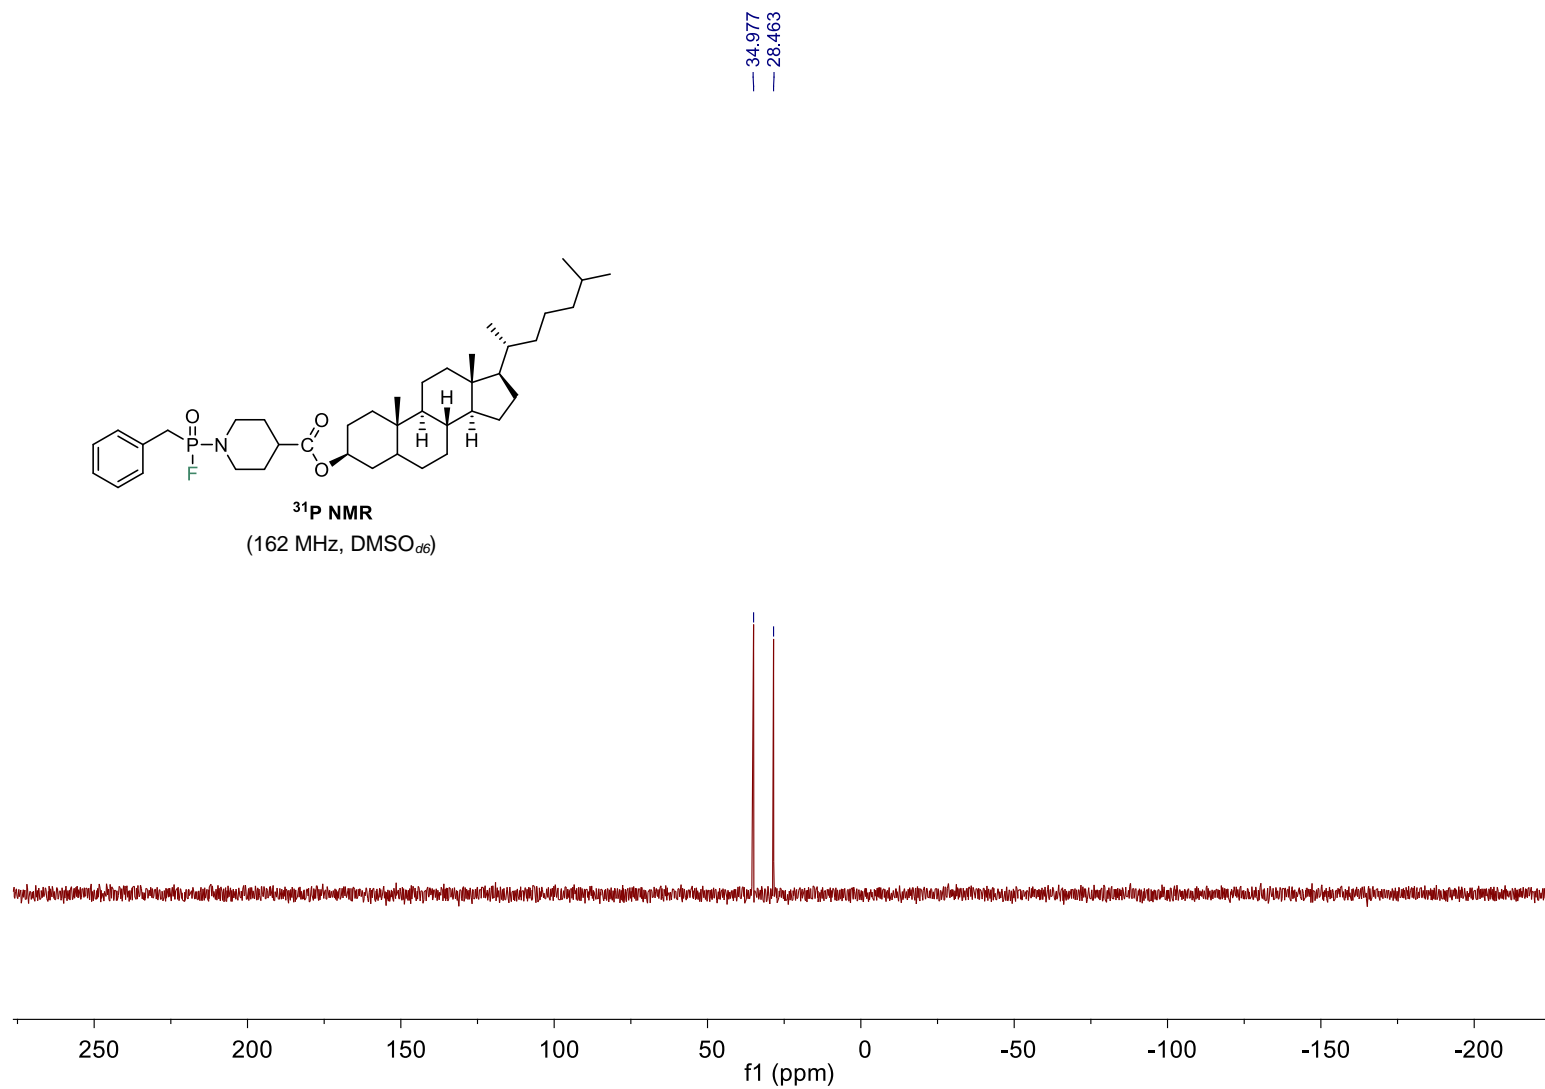

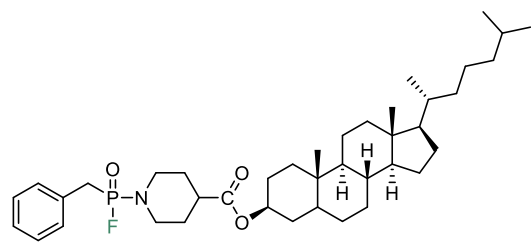

<sup>19</sup>F NMR  
(376 MHz, DMSO<sub>d6</sub>)

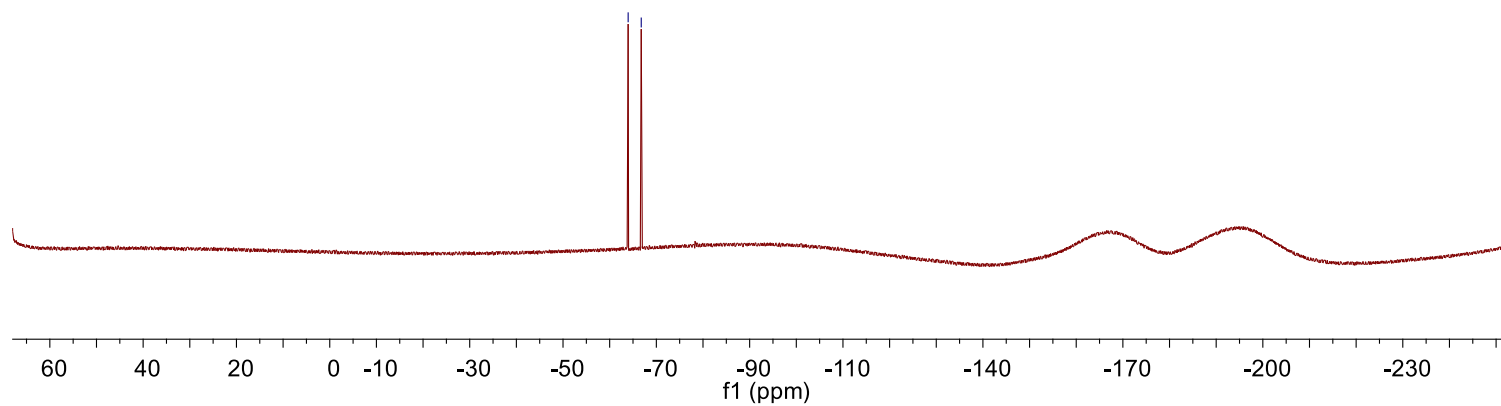

#### 4 Supplementary references

1. Timofey P. Martyanov, Evgeny N. Ushakov et al., Pseudodimeric Complexes of an (18-Crown-6) stilbene with Styryl Dyes Containing an Ammonioalkyl Group: Synthesis, Structure, and Stereospecific [2 + 2] Cross-Photocycloaddition. *J. Org. Chem.* **86**, 3164–3175 (2021).
2. Martín Fañanás-Mastral Ben L. Feringa. Copper-Catalyzed Synthesis of Mixed Alkyl Aryl Phosphonates. *J. Am. Chem. Soc.* **136**, 9894–9897 (2014).
3. Yong-Chul Kim, Sean G. Brown, T. Kendall Harden et al., Structure-Activity Relationships of Pyridoxal Phosphate Derivatives as Potent and Selective Antagonists of P2X1 Receptors. *J. Med. Chem.* **44**, 340–349 (2001).
4. Saied Ghadimi, Ali Asghar Ebrahimi Valmoozi et al., Structure-activity study of phosphoramido acid esters as acetylcholinesterase inhibitors. *Journal of Enzyme Inhibition and Medicinal Chemistry.* **23**, 556–561 (2008).
5. Bart Kesteleyn, Synthesis of Two Naphthoquinone Antibiotics Pentalongin and Psychorubrin. *Synthesis* **11**, 1881–1883 (1999).
6. Ajay Purohit, Heike Radeke, Michael Azure, et al., Synthesis and Biological Evaluation of Pyridazinone Analogues as Potential Cardiac Positron Emission Tomography Tracers. *J. Med. Chem.* **51**, 2954–2970 (2008).
7. Bart Kesteleyn, Synthesis of Two Naphthoquinone Antibiotics Pentalongin and Psychorubrin. *Synthesis* **11**, 1881–1883 (1999).
8. Qi-Wei Li, a Xin-Yue Zhang et al., TFAA/DMSO-Promoted Fluorination of P(O)–H and P(O)–OH Compounds: Compatible Access to Fluorophosphonates and Phosphonofluoridates. *Adv. Synth. Catal.* **364**, 938–946 (2022).
9. Martín Fañanás-Mastral Ben L. Feringa. Copper-Catalyzed Synthesis of Mixed Alkyl Aryl Phosphonates. *J. Am. Chem. Soc.* **136**, 9894–9897 (2014).

10. K. C. Nicolaou, Konstantina C. Fylaktakidou et al., Total Synthesis of popotolidin: Construction of Enantiomerically Pure Fragments. *J. Am. Chem. Soc.* **125**, 15433–15442 (2003).
11. Matthias M. H, Simon A. et al., On the consensus nomenclature rules for radiopharmaceutical chemistry – Reconsideration of radiochemical conversion. *Nucl. Med. Biol.* 93, 19–21 (2021).
12. Chao W, Lei Z, et al., Direct  $^{18}\text{F}$ -Labeling of Biomolecules *via* Spontaneous Site-specific Nucleophilic Substitution by  $\text{F}^-$  on Phosphonate Prostheses. *Org. Lett.*, 23, 11, 4261–4266. (2021).
13. Eberhardt, J., Santos-Martins, D., Tillack, A.F. & Forli, S. AutoDock Vina 1.2.0: New Docking Methods, Expanded Force Field, and Python Bindings. *J Chem Inf Model* 61, 3891–3898 (2021).
14. Trott, O. & Olson, A.J. AutoDock Vina: improving the speed and accuracy of docking with a new scoring function, efficient optimization, and multithreading. *J Comput Chem* 31, 455–461 (2010).
15. Stierand, K.; Maass, P. C.; Rarey, M. Drawing the PDB - Protein-Ligand Complexes in two Dimensions. *Medicinal Chemistry Letters*, 1 (9) 540–545. (2010).
16. S.G. Nekolla, S. Reder, RT et al., Evaluation of the Novel Myocardial Perfusion Positron-Emission Tomography Tracer  $^{18}\text{F}$ -BMS-747158-02: Comparison to  $^{13}\text{N}$ -Ammonia and Validation With Microspheres in a Pig Model. *Circulation* 119, 2333– 2342 (2009).
17. Zhanhong W, Zi-Bo L, et al.,  $^{18}\text{F}$ -labeled mini-PEG spacers RGD dimer ( $^{18}\text{F}$ -FPRGD2): synthesis and microPET imaging of  $\alpha_v\beta_3$  integrin expression. *Eur J Nucl Med Mol Imaging* 34, 1823–1831 (2007).
18. Zhao, Y. & Truhlar, D. G. A new local density functional for main-group thermochemistry, transition metal bonding, thermochemical kinetics, and noncovalent interactions. *J. Chem. Phys.* **125**, 194101–194118 (2006).

19. Scalmani, G. & Frisch, M. J. Continuous surface charge polarizable continuum models of solvation. I. General formalism. *J. Chem. Phys.* **132**, 114110–114125 (2010).
